# Supplementary material for: A split-GAL4 driver line resource for Drosophila neuron types
Source: bioRxiv preprint, doi:10.1101/2024.01.09.574419, version 4 (2024-10-29)
Supplement: Figure 1 - Supplemental File 1 [file 574419_file02.xlsx]

## Sheet: Cell type lines
Line	Adult/ Larval	Main annotator	Lab	Quality	Sex difference	VNC only	Brain only	DOI to cite	First author(s) & year	Janelia Robot ID	Cell types	EM Body IDs	Alias	Genotype
SS00043	Adult	Tanya Wolff	Rubin	1	N	No	No	10.1002/cne.24512	Wolff; 2018	2502208	PFNa		GMR_65B12-x-GMR_30E10	w; 65B12-p65ADZp in attP40; 30E10-ZpGdbd in attP2
SS00078	Adult	Tanya Wolff	Rubin	1	N	No	Yes	10.1002/cne.24512	Wolff; 2018	2502243	PFNd		GMR_16D01-x-GMR_15E01	w; 16D01-p65ADZp in attP40; 15E01-ZpGdbd in attP2
SS00090	Adult	Tanya Wolff	Rubin	1	N	No	Yes	10.1002/cne.24512	Wolff; 2018	2502255	EPG		GMR_19G02-x-GMR_15C03	w; 19G02-p65ADZp in attP40; 15C03-ZpGdbd in attP2
SS00098	Adult	Tanya Wolff	Rubin	1	N	No	No	10.1002/cne.24512	Wolff; 2018	2502263	EPG		GMR_19G02-x-GMR_93G12	w; 19G02-p65ADZp in attP40; 93G12-ZpGdbd in attP2
SS00191	Adult	Tanya Wolff	Rubin	1	N	No	Yes	10.1002/cne.24512	Wolff; 2018	2502356	PFNm_a, PFNm_b, PFNp_a, PFNp_b, PFNp_c, PFNp_d, PFNp_e		GMR_38G07-x-GMR_37H01	w; 38G07-p65ADZp in attP40/CyO; 37H01-ZpGdbd in attP2
SS02191	Adult	Tanya Wolff	Rubin	2	N	No	No	10.1002/cne.24512	Wolff; 2018	3017970	PEG		VT000355-x-VT040589	w; VT000355-p65ADZp in attP40/CyO::Tb-RFP; VT040589-ZpGdbd in attP2/TM6B
SS02195	Adult	Tanya Wolff	Rubin	1	N	No	No	10.1002/cne.24512	Wolff; 2018	3017974	PEcG		VT000355-x-GMR_47A08	w; VT000355-p65ADZp in attP40; 47A08-ZpGdbd in attP2
SS02254	Adult	Tanya Wolff	Rubin	2	N	No	No	10.1002/cne.24512	Wolff; 2018	3018120	EPGt		GMR_15E01-x-VT016114	w; 15E01-p65ADZp in attP40; VT016114-ZpGdbd in attP2
SS02270	Adult	Tanya Wolff	Rubin	2	N	No	No	10.1002/cne.24512	Wolff; 2018	3018136	PFR_a		GMR_30G06-x-GMR_27A10	w; 30G06-p65ADZp in attP40; 27A10-ZpGdbd in attP2
SS02293	Adult	Tanya Wolff	Rubin	2	N	No	No	10.1002/cne.24512	Wolff; 2018	3018159	PFR_a, PFR_b		GMR_41G11-x-VT005534	w; 41G11-p65ADZp in attP40; VT005534-ZpGdbd in attP2
SS02718	Adult	Tanya Wolff	Rubin	1	N	No	Yes	10.1002/cne.24512	Wolff; 2018	3018714	vDeltaA_a, vDeltaA_a, vDeltaA_b, vDeltaA_b		VT005529-x-GMR_83D12	w; VT005529-p65ADZp in attP40; 83D12-ZpGdbd in attP2/TM6B
SS04778	Adult	Tanya Wolff	Rubin	1	N	No	No	10.1002/cne.24512	Wolff; 2018	3021786	IbSpsP		GMR_47G08-x-VT012791	w; 47G08-p65ADZp in attP40/CyO::Tb-RFP; VT012791-ZpGdbd in attP2
SS20046	Adult	Tanya Wolff	Rubin	2	N	No	No	10.1002/cne.24512	Wolff; 2018	3028332	PFGs		VT000355-x-GMR_21E02	w; VT000355-p65ADZp in attP40; 21E02-ZpGdbd in attP2
SS24258	Adult	Tanya Wolff	Rubin	1	N	No	No	10.1002/cne.24512	Wolff; 2018	3029111	AF		VT058568-x-GMR_83D12	w; VT058568-p65ADZp in attP40; 83D12-ZpGdbd in attP2/TM6B
SS25983	Adult	Tanya Wolff	Rubin	2	N	No	No	10.1002/cne.24512	Wolff; 2018	3031576	IbSpsP, IbSpsP		GMR_47G08-x-GMR_26F04	w; 47G08-p65ADZp in attP40/CyO::Tb-RFP; 26F04-ZpGdbd in attP2
SS27853	Adult	Tanya Wolff	Rubin	2	N	No	No	10.1002/cne.24512	Wolff; 2018	3024263	PEG		GMR_33A12-x-VT040589	w; 33A12-p65ADZp in JK22C/CyO::Tb-RFP; VT040589-ZpGdbd in attP2
SS46507	Adult	Tanya Wolff	Rubin	2	Y	No	No	10.1002/cne.24512	Wolff; 2018	3027305	LCNOp		VT040713-x-VT006486	w; VT040713-p65ADZp in attP40; VT006486-ZpGdbd in attP2
SS46512	Adult	Tanya Wolff	Rubin	2	N	No	No	10.1002/cne.24512	Wolff; 2018	3027306	LAL.s-GAi.s-NO1i.b		VT049354-x-VT026669	w; VT049354-p65ADZp in attP40; VT026669-ZpGdbd in attP2
SS46515	Adult	Tanya Wolff	Rubin	2	N	No	No	10.1002/cne.24512	Wolff; 2018	3027292	LAL.s-GAi.s-NO1i.b		VT049354-x-VT006199	w; VT049354-p65ADZp in attP40; VT006199-ZpGdbd in attP2
SS46517	Adult	Tanya Wolff	Rubin	1	N	No	Yes	10.1002/cne.24512	Wolff; 2018	3027309	GLNO		VT037871-x-VT060202	w; VT037871-p65ADZp in attP40/CyO::Tb-RFP; VT060202-ZpGdbd in attP2
SS46525	Adult	Tanya Wolff	Rubin	2	N	No	No	10.1002/cne.24512	Wolff; 2018	3027352	LCNOp		VT000605-x-VT006199	w; VT000605-p65ADZp in attP40; VT006199-ZpGdbd in attP2
SS47384	Adult	Tanya Wolff	Rubin	1	N	No	No	10.1002/cne.24512	Wolff; 2018	3027357	LCNOpm		VT048946-x-VT008882	w; VT048946-p65ADZp in attP40; VT008882-ZpGdbd in attP2
SS47398	Adult	Tanya Wolff	Rubin	3	N	No	No	10.1002/cne.24512	Wolff; 2018	3027345	LNO1		VT020742-x-VT017270	w; VT020742-p65ADZp in attP40; VT017270-ZpGdbd in attP2
SS47405	Adult	Tanya Wolff	Rubin	2	N	No	No	10.1002/cne.24512	Wolff; 2018	3030303	LNO1		VT020742-x-GMR_73E12	w; VT020742-p65ADZp in attP40/CyO::Tb-RFP; 73E12-ZpGdbd in attP2
SS47406	Adult	Tanya Wolff	Rubin	1	N	No	No	10.1002/cne.24512	Wolff; 2018	3027367	LNOa		VT006486-x-VT024603	w; VT006486-p65ADZp in attP40/CyO::Tb-RFP; VT024603-ZpGdbd in attP2
SS47436	Adult	Tanya Wolff	Rubin	2	N	No	No	10.1002/cne.24512	Wolff; 2018	3027373	GLNO		GMR_12G04-x-VT046049	w; 12G04-p65ADZp in attP40; VT046049-ZpGdbd in attP2
SS50447	Adult	Tanya Wolff	Rubin	1	N	No	No	10.1002/cne.24512	Wolff; 2018	3028099	vDeltaA_a		VT008281-x-VT008652	w; VT008281-p65ADZp in attP40; VT008652-ZpGdbd in attP2
SS50498	Adult	Tanya Wolff	Rubin	1	N	No	Yes	10.1002/cne.24512	Wolff; 2018	3028104	SA1_a, Slp-A		GMR_26C06-x-VT017124	w; 26C06-p65ADZp in attP40; VT017124-ZpGdbd in attP2
SS50502	Adult	Tanya Wolff	Rubin	1	N	No	Yes	10.1002/cne.24512	Wolff; 2018	3028119	SA1_a, SA1_c, SA2_a, SA2_b, SA3		GMR_26C06-x-GMR_72A10	w; 26C06-p65ADZp in attP40; 72A10-ZpGdbd in attP2
SS50510	Adult	Tanya Wolff	Rubin	1	N	No	Yes	10.1002/cne.24512	Wolff; 2018	3028105	SA1_b, SA1_c, SA2_a, SA2_b, SA3		GMR_42C09-x-VT017124	w; 42C09-p65ADZp in attP40; VT017124-ZpGdbd in attP2
SS50576	Adult	Tanya Wolff	Rubin	1	N	No	No	10.1002/cne.24512	Wolff; 2018	3030323	EPGt		VT017491-x-GMR_65H10	w[1118]; P{y[+t7.7] w[+mC]=VT017491-p65.AD}attP40; P{y[+t7.7] w[+mC]=R65H10-GAL4.DBD}attP2
SS52244	Adult	Tanya Wolff	Rubin	1	N	No	No	10.1002/cne.24512	Wolff; 2018	3028329	PFNm_a, PFNm_b, PFNp_a, PFNp_b, PFNp_c, PFNp_d, PFNp_e		VT039497-x-GMR_48A11	w; VT039497-p65ADZp in attP40/CyO::Tb-RFP; 48A11-ZpGdbd in attP2
SS52245	Adult	Tanya Wolff	Rubin	1	N	No	Yes	10.1002/cne.24512	Wolff; 2018	3030027	PFNm+p, PFNp+m		VT039497-x-GMR_83D12	w; VT039497-p65ADZp in attP40; 83D12-ZpGdbd in attP2/TM6B
SS52257	Adult	Tanya Wolff	Rubin	1	N	No	No	10.1002/cne.24512	Wolff; 2018	3028324	Delta7		VT043920-x-GMR_24A02	w; VT043920-p65ADZp in attP40; 24A02-ZpGdbd in attP2
SS52313	Adult	Tanya Wolff	Rubin	1	N	No	No	10.1002/cne.24512	Wolff; 2018	3030019	Delta7		GMR_45G06-x-GMR_27G01	w; 45G06-p65ADZp in attP40; 27G01-ZpGdbd in attP2/TM6B
SS52547	Adult	Tanya Wolff	Rubin	2	N	No	No	10.1002/cne.24512	Wolff; 2018	3030291	PFGs		VT000355-x-VT061918	w[1118]; P{y[+t7.7] w[+mC]=VT000355-p65.AD}attP40; P{y[+t7.7] w[+mC]=VT061918-GAL4.DBD}attP2
SS52577	Adult	Tanya Wolff	Rubin	1	N	No	Yes	10.1002/cne.24512	Wolff; 2018	3028433	PFNv		VT063307-x-VT019742	w; VT063307-p65ADZp in attP40; VT019742-ZpGdbd in attp2
SS52578	Adult	Tanya Wolff	Rubin	1	N	No	No	10.1002/cne.24512	Wolff; 2018	3028418	LPsP		VT029577-x-VT038817	w; VT029577-p65ADZp in attP40/CyO::Tb-RFP; VT038817-ZpGdbd in attp2
SS52590	Adult	Tanya Wolff	Rubin	2	N	No	No	10.1002/cne.24512	Wolff; 2018	3028424	PFGs		VT017491-x-VT000355	w; VT017491-p65ADZp in attP40; VT000355-ZpGdbd in attp2
SS52631	Adult	Tanya Wolff	Rubin	2	N	No	No	10.1002/cne.24512	Wolff; 2018	3028450	PFNd		GMR_22G07-x-GMR_55C11	w; ; 22G07-p65ADZp in JK73A, 55C11-ZpGdbd in attp2/TM3
SS52669	Adult	Tanya Wolff	Rubin	1	N	No	No	10.1002/cne.24512	Wolff; 2018	3028449	PFNd		GMR_68A10-x-GMR_75H10	w; 68A10-p65ADZp in attP40/CyO::Tb-RFP; 75H10-ZpGdbd in attp2
SS53161	Adult	Tanya Wolff	Rubin	1	N	No	Yes	10.1002/cne.24512	Wolff; 2018	3028428	PFNv		VT063307-x-VT057247	w; VT063307-p65ADZp in attP40; VT057247-ZpGdbd in attp2/TM6B
SS53185	Adult	Tanya Wolff	Rubin	1	N	No	Yes	10.1002/cne.24512	Wolff; 2018	3029084	PFL1		GMR_11B11-x-VT063731	w; 11B11-p65ADZp in attP40/CyO::Tb-RFP; VT063731-ZpGdbd in attP2
SS54295	Adult	Tanya Wolff	Rubin	1	N	No	Yes	10.1002/cne.24512	Wolff; 2018	3028434	PEN_b(PEN2)		VT026664-x-VT032907	w; VT026664-p65ADZp in attP40; VT032907-ZpGdbd in attp2/TM6B
SS54549	Adult	Gerry Rubin	Rubin	1	N	No	No	10.1002/cne.24512	Wolff; 2018	3029433	PFR_b		GMR_38B06-x-VT027015	w; 38B06-p65ADZp in attP40; VT027015-ZpGdbd in attP2
SS56247	Adult	Tanya Wolff	Rubin	1	N	No	No	10.1002/cne.24512	Wolff; 2018	3031579	P1-9		VT019012-x-VT064562	w; VT019012-p65ADZp in attP40; VT064562-ZpGdbd in attP2/TM6B
MB546B	Adult	Yoshi Aso	Aso	1	N	No	No	10.1016/j.cub.2019.01.009	Jovanic; 2019	2501892	VL1_ilPN	1912789965, 2166133204	GMR_65G01_BB_21-x-GMR_82D04_AV_01	w[1118]; P{y[+t7.7] w[+mC]=R65G01-p65.AD}attP40/CyO, P{w[+mC]=2xTb[1]-RFP}CyO; P{y[+t7.7] w[+mC]=R82D04-GAL4.DBD}attP2
SS01965	Adult	DI	DI	1	N	Not determined	Not determined	10.1016/j.cub.2019.01.009	Jovanic; 2019	3017334	DNa04x2		VT043086-x-VT047755	w[1118]; P{y[+t7.7] w[+mC]=VT043086-p65.AD}attP40; P{y[+t7.7] w[+mC]=VT047755-GAL4.DBD}attP2/TM6B, Tb[1]
SS45512	Adult	Kaiyu Wang	Dickson	2	Y	No	No	10.1016/j.cub.2020.07.083	Wang, Wang; 2020	3026785	Abg_SN		VT043658-x-VT036267	w; VT043658-p65ADZp in attP40; VT036267-ZpGdbd in attP2
SS53459	Adult	Kaiyu Wang	Dickson	2	Y	No	No	10.1016/j.cub.2020.07.083	Wang, Wang; 2020	3028354	pC2l		VT029750-x-GMR_20G10	w; VT029750-p65ADZp in attP40; 20G10-ZpGdbd in attP2/TM6B
SS60797	Adult	Kaiyu Wang	Dickson	1	N	No	No	10.1016/j.cub.2020.07.083	Wang, Wang; 2020	3032626	Abg_MN		GMR_TDC2-x-BJD_dsx	w[1118]; TI{GAL4(DBD)::Zip-}dsx[GAL4(DBD)::Zip-] PBac{y[+mDint2] w[+mC]=Tdc2-p65.AD}VK00027/TM3, Sb[1]
SS61089	Adult	Kaiyu Wang	Dickson	1	Y	No	No	10.1016/j.cub.2020.07.083	Wang, Wang; 2020	3032693	DNp13	887195902	VT038159-x-GMR_20C08	w; 38159-p65ADZp in attP40/CyO; 20C08-ZpGdbd in attP2/TM6B
SS61090	Adult	Kaiyu Wang	Dickson	1	N	No	No	10.1016/j.cub.2020.07.083	Wang, Wang; 2020	3032694	DNp13	887195902	VT038159-x-VT029317	w; 38159-p65ADZp in attP40/CyO; VT029317-ZpGdbd in attP2/TM6B
SS01562	Adult	DI	DI	1	N	No	No	10.1016/j.cub.2022.01.008	Namiki, Ros; 2022	3016861			GMR_42B02-x-VT039465	w[1118]; P{y[+t7.7] w[+mC]=R42B02-p65.AD}attP40; P{y[+t7.7] w[+mC]=VT039465-GAL4.DBD}attP2
SS01563	Adult	DI	DI	2	N	No	No	10.1016/j.cub.2022.01.008	Namiki, Ros; 2022	3016862			GMR_42B02-x-VT058697	w[1118]; P{y[+t7.7] w[+mC]=R42B02-p65.AD}attP40; P{y[+t7.7] w[+mC]=VT058697-GAL4.DBD}attP2
SS01577	Adult	DI	DI	2	N	No	No	10.1016/j.cub.2022.01.008	Namiki, Ros; 2022	3016876			VT039465-x-VT011148	w[1118]; P{y[+t7.7] w[+mC]=VT039465-p65.AD}attP40; P{y[+t7.7] w[+mC]=VT011148-GAL4.DBD}attP2
SS01578	Adult	DI	DI	1	N	No	No	10.1016/j.cub.2022.01.008	Namiki, Ros; 2022	3016877			VT039465-x-VT061933	w; VT039465-p65ADZ in attP40; VT061933-ZpGDBD in attP2
SS02544	Adult	DI	DI	2	N	No	No	10.1016/j.cub.2022.01.008	Namiki, Ros; 2022	3018536			GMR_19G08-x-VT020379	w[1118]; P{y[+t7.7] w[+mC]=R19G08-p65.AD}attP40; P{y[+t7.7] w[+mC]=VT020379-GAL4.DBD}attP2
SS02550	Adult	DI	DI	1	N	No	No	10.1016/j.cub.2022.01.008	Namiki, Ros; 2022	3018542			GMR_42B02-x-VT020379	w[1118]; P{y[+t7.7] w[+mC]=R42B02-p65.AD}attP40; P{y[+t7.7] w[+mC]=VT020379-GAL4.DBD}attP2/TM6B, Tb[1]
SS02551	Adult	DI	DI	1	N	No	No	10.1016/j.cub.2022.01.008	Namiki, Ros; 2022	3018543			GMR_42B02-x-VT025789	w[1118]; P{y[+t7.7] w[+mC]=R42B02-p65.AD}attP40; P{y[+t7.7] w[+mC]=VT025789-GAL4.DBD}attP2
SS02627	Adult	DI	DI	1	N	No	No	10.1016/j.cub.2022.01.008	Namiki, Ros; 2022	3018677			VT042835-x-VT039465	w[1118]; P{y[+t7.7] w[+mC]=VT042835-p65.AD}attP40; P{y[+t7.7] w[+mC]=VT039465-GAL4.DBD}attP2
SS02630	Adult	DI	DI	1	N	No	No	10.1016/j.cub.2022.01.008	Namiki, Ros; 2022	3018680			GMR_19G08-x-VT023750	w[1118]; P{y[+t7.7] w[+mC]=R19G08-p65.AD}attP40; P{y[+t7.7] w[+mC]=VT023750-GAL4.DBD}attP2
SS17963	Adult	Aljoscha Nern	Rubin	1	N	No	No	10.1016/j.cub.2022.06.019	Baker; 2022	3024544	AVLP111 and/or similar, AVLP_pr03		GMR_81C11-x-GMR_72F09	w[1118]; P{y[+t7.7] w[+mC]=R81C11-p65.AD}attP40; P{y[+t7.7] w[+mC]=R72F09-GAL4.DBD}attP2
SS21914	Adult	Aljoscha Nern	Rubin	2	N	No	No	10.1016/j.cub.2022.06.019	Baker; 2022	3023127	AVLP TBD, AVLP_pr04		GMR_52G04-x-GMR_52H01	w[1118]; P{y[+t7.7] w[+mC]=R52G04-p65.AD}attP40; P{y[+t7.7] w[+mC]=R52H01-GAL4.DBD}attP2/TM6B, Tb[+]
SS23281	Adult	Aljoscha Nern	Rubin	2	N	No	No	10.1016/j.cub.2022.06.019	Baker; 2022	3023268	AVLP TBD, AVLP_pr05, AVLP-PN1		VT062612-x-VT026543	w[1118]; P{y[+t7.7] w[+mC]=VT062612-p65.AD}attP40/CyO, P{w[+mC]=2xTb[1]-RFP}CyO; P{y[+t7.7] w[+mC]=VT026543-GAL4.DBD}attP2
SS23627	Adult	Aljoscha Nern	Rubin	1	N	No	Yes	10.1016/j.cub.2022.06.019	Baker; 2022	3023705	AVLP TBD, AVLP_pr06		VT003275-x-VT005539	w[1118]; P{y[+t7.7] w[+mC]=VT003275-p65.AD}attP40; P{y[+t7.7] w[+mC]=VT005539-GAL4.DBD}attP2
SS27953	Adult	Claire McKellar	Dickson	2	N	No	No	10.1016/j.cub.2022.06.019	Baker; 2022	3031430	AVLP_pr09		GMR_95D03-x-GMR_83B04	w[1118]; P{y[+t7.7] w[+mC]=R95D03-p65.AD}attP40; P{y[+t7.7] w[+mC]=R83B04-GAL4.DBD}attP2
SS28822	Adult	Aljoscha Nern	Rubin	1	N	No	No	10.1016/j.cub.2022.06.019	Baker; 2022	3024769	AVLP TBD, AVLP_pr10		VT057295-x-VT019732	w[1118]; P{y[+t7.7] w[+mC]=VT057295-p65.AD}attP40; P{y[+t7.7] w[+mC]=VT019732-GAL4.DBD}attP2
SS29136	Adult	Claire McKellar	Dickson	1	N	No	No	10.1016/j.cub.2022.06.019	Baker; 2022	3031431	AVLP_pr11		GMR_43D07-x-VT019732	w[1118]; P{y[+t7.7] w[+mC]=R43D07-p65.AD}attP40; P{y[+t7.7] w[+mC]=VT019732-GAL4.DBD}attP2
SS35456	Adult	Claire McKellar	Dickson	1	N	No	No	10.1016/j.cub.2022.06.019	Baker; 2022	3031439	AVLP_pr14		VT038216-x-VT005539	w[1118]; P{y[+t7.7] w[+mC]=VT038216-p65.AD}attP40/CyO, P{w[+mC]=2xTb[1]-RFP}CyO; P{y[+t7.7] w[+mC]=VT005539-GAL4.DBD}attP2
SS35471	Adult	Claire McKellar	Dickson	1	N	No	No	10.1016/j.cub.2022.06.019	Baker; 2022	3031442	AVLP_pr15		GMR_24D12-x-GMR_10B02	w[1118]; P{y[+t7.7] w[+mC]=R24D12-p65.AD}attP40; P{y[+t7.7] w[+mC]=R10B02-GAL4.DBD}attP2
SS35484	Adult	Claire McKellar	Dickson	1	N	No	No	10.1016/j.cub.2022.06.019	Baker; 2022	3031444	AVLP_pr16		GMR_28E01-x-GMR_43D07	w[1118]; P{y[+t7.7] w[+mC]=R28E01-p65.AD}attP40/CyO, P{w[+mC]=2xTb[1]-RFP}CyO; P{y[+t7.7] w[+mC]=R43D07-GAL4.DBD}attP2/TM6B, Tb[1]
SS35502	Adult	Claire McKellar	Dickson	1	N	No	Yes	10.1016/j.cub.2022.06.019	Baker; 2022	3031449	AVLP_pr18		GMR_28E01-x-GMR_89G04	w[1118]; P{y[+t7.7] w[+mC]=R28E01-p65.AD}attP40/CyO; P{y[+t7.7] w[+mC]=R89G04-GAL4.DBD}attP2
SS35916	Adult	Claire McKellar	Dickson	1	N	No	No	10.1016/j.cub.2022.06.019	Baker; 2022	3031452	WED_pr02		VT013504-x-GMR_11C07	w[1118]; P{y[+t7.7] w[+mC]=VT013504-p65.AD}attP40; P{y[+t7.7] w[+mC]=R11C07-GAL4.DBD}attP2
SS36960	Adult	Claire McKellar	Dickson	1	N	No	Yes	10.1016/j.cub.2022.06.019	Baker; 2022	3031470	AVLP_pr21		GMR_52E12-x-VT055068	w[1118]; P{y[+t7.7] w[+mC]=R52E12-p65.AD}attP40; P{y[+t7.7] w[+mC]=VT055068-GAL4.DBD}attP2
SS36971	Adult	Claire McKellar	Dickson	2	Y	No	Yes	10.1016/j.cub.2022.06.019	Baker; 2022	3031473	SIP_pr01		GMR_42F06-x-GMR_11A07	w[1118]; P{y[+t7.7] w[+mC]=R42F06-p65.AD}attP40; P{y[+t7.7] w[+mC]=R11A07-GAL4.DBD}attP2/TM6B, Tb[1]
SS38918	Adult	Claire McKellar	Dickson	1	N	No	Yes	10.1016/j.cub.2022.06.019	Baker; 2022	3031479	AVLP_pr23, AV2 [S14]		GMR_11B11-x-GMR_31C03	w[1118]; P{y[+t7.7] w[+mC]=R11B11-p65.AD}attP40; P{y[+t7.7] w[+mC]=R31C03-GAL4.DBD}attP2
SS40316	Adult	Claire McKellar	Dickson	1	N	No	Yes	10.1016/j.cub.2022.06.019	Baker; 2022	3031486	PVLP_pr03		VT023842-x-VT017411	w[1118]; P{y[+t7.7] w[+mC]=VT023842-p65.AD}attP40; P{y[+t7.7] w[+mC]=VT017411-GAL4.DBD}attP2
SS40361	Adult	Claire McKellar	Dickson	1	N	No	Yes	10.1016/j.cub.2022.06.019	Baker; 2022	3031490	AVLP_pr25		VT057295-x-GMR_73H04	w[1118]; P{y[+t7.7] w[+mC]=VT057295-p65.AD}attP40; P{y[+t7.7] w[+mC]=R73H04-GAL4.DBD}attP2/TM6B, Tb[1]
SS40366	Adult	Claire McKellar	Dickson	2	N	No	Yes	10.1016/j.cub.2022.06.019	Baker; 2022	3029064	AVLP_pr26		GMR_65A11-x-VT014480	w[1118]; P{y[+t7.7] w[+mC]=R65A11-p65.AD}attP40; P{y[+t7.7] w[+mC]=VT014480-GAL4.DBD}attP2
SS41704	Adult	Claire McKellar	Dickson	1	N	No	Yes	10.1016/j.cub.2022.06.019	Baker; 2022	3031495	PLP_pr02		GMR_12C04-x-VT029570	w[1118]; P{y[+t7.7] w[+mC]=R12C04-p65.AD}attP40; P{y[+t7.7] w[+mC]=VT029570-GAL4.DBD}attP2
SS41728	Adult	Claire McKellar	Dickson	1	N	No	Yes	10.1016/j.cub.2022.06.019	Baker; 2022	3031494	AVLP_pr31		GMR_11C10-x-VT059438	w[1118]; P{y[+t7.7] w[+mC]=R11C10-p65.AD}attP40/CyO; P{y[+t7.7] w[+mC]=VT059438-GAL4.DBD}attP2
SS41730	Adult	Claire McKellar	Dickson	1	N	No	No	10.1016/j.cub.2022.06.019	Baker; 2022	3031511	AVLP_pr32		VT029570-x-VT059438	w[1118]; P{y[+t7.7] w[+mC]=VT029570-p65.AD}attP40/CyO; P{y[+t7.7] w[+mC]=VT059438-GAL4.DBD}attP2/TM6B, Tb[1]
SS41739	Adult	Claire McKellar	Dickson	1	N	No	Yes	10.1016/j.cub.2022.06.019	Baker; 2022	3031514	SAD_pr01		VT040004-x-VT044105	w[1118]; P{y[+t7.7] w[+mC]=VT040004-p65.AD}attP40/CyO; P{y[+t7.7] w[+mC]=VT044105-GAL4.DBD}attP2
SS43321	Adult	Claire McKellar	Dickson	1	N	No	Yes	10.1016/j.cub.2022.06.019	Baker; 2022	3031506	SAD/AMMC_pr01		VT009665-x-VT063231	w[1118]; P{y[+t7.7] w[+mC]=VT009665-p65.AD}attP40/CyO; P{y[+t7.7] w[+mC]=VT063231-GAL4.DBD}attP2/TM6B, Tb[1]
SS43466	Adult	Claire McKellar	Dickson	1	N	No	Yes	10.1016/j.cub.2022.06.019	Baker; 2022	3031509	SMP_pr01		VT026990-x-GMR_76B06	w[1118]; P{y[+t7.7] w[+mC]=VT026990-p65.AD}attP40; P{y[+t7.7] w[+mC]=R76B06-GAL4.DBD}attP2
SS44510	Adult	Claire McKellar	Dickson	1	N	No	No	10.1016/j.cub.2022.06.019	Baker; 2022	3031515	IB_pr01		VT040592-x-GMR_29F02	w[1118]; P{y[+t7.7] w[+mC]=VT040592-p65.AD}attP40/CyO; P{y[+t7.7] w[+mC]=R29F02-GAL4.DBD}attP2
SS45858	Adult	Claire McKellar	Dickson	1	N	No	No	10.1016/j.cub.2022.06.019	Baker; 2022	3031500	AVLP_pr35		GMR_68A10-x-GMR_21D07	w[1118]; P{y[+t7.7] w[+mC]=R68A10-p65.AD}attP40/CyO; P{y[+t7.7] w[+mC]=R21D07-GAL4.DBD}attP2
SS47261	Adult	Claire McKellar	Dickson	1	N	No	No	10.1016/j.cub.2022.06.019	Baker; 2022	3031504	AVLP_pr36		VT008153-x-VT029570	w[1118]; P{y[+t7.7] w[+mC]=VT008153-p65.AD}attP40/CyO; P{y[+t7.7] w[+mC]=VT029570-GAL4.DBD}attP2/TM6B, Tb[1]
SS47509	Adult	Claire McKellar	Dickson	2	N	No	No	10.1016/j.cub.2022.06.019	Baker; 2022	3031496	AVLP_pr37		GMR_13A08-x-GMR_52F01	w[1118]; P{y[+t7.7] w[+mC]=R13A08-p65.AD}attP40/CyO; P{y[+t7.7] w[+mC]=R52F01-GAL4.DBD}attP2
SS42738	Adult	Kaiyu Wang	Dickson	1	N	No	No	10.1016/j.cub.2024.01.015	Lillvis; 2023	3040579	WN_LN_mixed		VT026999-x-VT018838	w[1118]; P{y[+t7.7] w[+mC]=VT026999-p65.AD}attP40/CyO, P{w[+mC]=2xTb[1]-RFP}CyO; P{y[+t7.7] w[+mC]=VT018838-GAL4.DBD}attP2/TM6B, Tb[1]
SS46542	Adult	Kaiyu Wang	Dickson	1	Y	No	No	10.1016/j.cub.2024.01.015	Lillvis; 2023	3027850	pIP10		VT040556-x-VT040347	w[1118]; P{y[+t7.7] w[+mC]=VT040556-p65.AD}attP40; P{y[+t7.7] w[+mC]=VT040347-GAL4.DBD}attP2
SS50245	Adult	Kaiyu Wang	Dickson	2	N	No	No	10.1016/j.cub.2024.01.015	Lillvis; 2023	3029795	WN_LN_mixed		GMR_77C10-x-GMR_20A03	w[1118]; P{y[+t7.7] w[+mC]=R77C10-p65.AD}attP40; P{y[+t7.7] w[+mC]=R20A03-GAL4.DBD}attP2/TM6B, Tb[1]
SS51755	Adult	Kaiyu Wang	Dickson	1	N	No	No	10.1016/j.cub.2024.01.015	Lillvis; 2023	3029774	AN		VT015971-x-VT015971	w[1118]; P{y[+t7.7] w[+mC]=VT015971-p65.AD}attP40/CyO, P{w[+mC]=2xTb[1]-RFP}CyO; P{y[+t7.7] w[+mC]=VT015971-GAL4.DBD}attP2
SS51772	Adult	Kaiyu Wang	Dickson	2	N	No	No	10.1016/j.cub.2024.01.015	Lillvis; 2023	3029781	WN_LN_mixed		VT042732-x-VT019074	w[1118]; P{y[+t7.7] w[+mC]=VT042732-p65.AD}attP40; P{y[+t7.7] w[+mC]=VT019074-GAL4.DBD}attP2
SS52458	Adult	Kaiyu Wang	Dickson	1	N	Yes	No	10.1016/j.cub.2024.01.015	Lillvis; 2023	3029665	WN_LN_mixed		VT044168-x-VT038817	w[1118]; P{y[+t7.7] w[+mC]=VT044168-p65.AD}attP40/CyO, P{w[+mC]=2xTb[1]-RFP}CyO; P{y[+t7.7] w[+mC]=VT038817-GAL4.DBD}attP2
SS52476	Adult	Kaiyu Wang	Dickson	1	N	No	No	10.1016/j.cub.2024.01.015	Lillvis; 2023	3030106	WN_LN_mixed		VT040560-x-VT032404	w[1118]; P{y[+t7.7] w[+mC]=VT040560-p65.AD}attP40; P{y[+t7.7] w[+mC]=VT032404-GAL4.DBD}attP2
SS52815	Adult	Kaiyu Wang	Dickson	1	Y	Yes	No	10.1016/j.cub.2024.01.015	Lillvis; 2023	3029767	AN		VT014013-x-VT063635	w[1118]; P{y[+t7.7] w[+mC]=VT014013-p65.AD}attP40/CyO, P{w[+mC]=2xTb[1]-RFP}CyO; P{y[+t7.7] w[+mC]=VT063635-GAL4.DBD}attP2
SS52839	Adult	Kaiyu Wang	Dickson	2	N	No	No	10.1016/j.cub.2024.01.015	Lillvis; 2023	3029782	WN_AN		VT017002-x-VT057224	w[1118]; P{y[+t7.7] w[+mC]=VT017002-p65.AD}attP40; P{y[+t7.7] w[+mC]=VT057224-GAL4.DBD}attP2
SS52867	Adult	Kaiyu Wang	Dickson	2	N	No	No	10.1016/j.cub.2024.01.015	Lillvis; 2023	3029703	WN_AN		VT057286-x-VT040359	w[1118]; P{y[+t7.7] w[+mC]=VT057286-p65.AD}attP40; P{y[+t7.7] w[+mC]=VT040359-GAL4.DBD}attP2
SS54706	Adult	Kaiyu Wang	Dickson	2	N	No	No	10.1016/j.cub.2024.01.015	Lillvis; 2023	3030271	WN_LN_mixed		VT019728-x-VT038817	w[1118]; P{y[+t7.7] w[+mC]=VT019728-p65.AD}attP40; P{y[+t7.7] w[+mC]=VT038817-GAL4.DBD}attP2
SS54712	Adult	Kaiyu Wang	Dickson	2	N	No	No	10.1016/j.cub.2024.01.015	Lillvis; 2023	3029970	WN_LN_mixed		VT048828-x-VT043699	w[1118]; P{y[+t7.7] w[+mC]=VT048828-p65.AD}attP40; P{y[+t7.7] w[+mC]=VT043699-GAL4.DBD}attP2
SS54847	Adult	Kaiyu Wang	Dickson	1	N	Yes	No	10.1016/j.cub.2024.01.015	Lillvis; 2023	3030105	WN_LN_mixed		VT026179-x-VT032404	w[1118]; P{y[+t7.7] w[+mC]=VT026179-p65.AD}attP40; P{y[+t7.7] w[+mC]=VT032404-GAL4.DBD}attP2
SS58626	Adult	Kaiyu Wang	Dickson	2	Y	Yes	No	10.1016/j.cub.2024.01.015	Lillvis; 2023	3032328	WN_LN_mixed		VT037491-x-VT019739	w[1118]; P{y[+t7.7] w[+mC]=VT037491-p65.AD}attP40; P{y[+t7.7] w[+mC]=VT019739-GAL4.DBD}attP2
SS59290	Adult	Kaiyu Wang	Dickson	1	Y	No	No	10.1016/j.cub.2024.01.015	Lillvis; 2023	3032408	WN_LN_mixed		VT037491-x-VT057137	w[1118]; P{y[+t7.7] w[+mC]=VT037491-p65.AD}attP40/CyO, P{w[+mC]=2xTb[1]-RFP}CyO; P{y[+t7.7] w[+mC]=VT057137-GAL4.DBD}attP2
SS59830	Adult	Kaiyu Wang	Dickson	1	Y	Yes	No	10.1016/j.cub.2024.01.015	Lillvis; 2023	3032207	WN_LN_mixed		VT059780-x-BJD_dsx	w[1118]; P{y[+t7.7] w[+mC]=VT059780-p65.AD}attP40; TI{GAL4(DBD)::Zip-}dsx[GAL4(DBD)::Zip-]/TM6B, Tb[1]
SS59832	Adult	Kaiyu Wang	Dickson	1	Y	No	No	10.1016/j.cub.2024.01.015	Lillvis; 2023	3032209	WN_LN_mixed		VT042732-x-BJD_dsx	w[1118]; P{y[+t7.7] w[+mC]=VT042732-p65.AD}attP40/CyO, P{w[+mC]=2xTb[1]-RFP}CyO; TI{GAL4(DBD)::Zip-}dsx[GAL4(DBD)::Zip-]/TM6B, Tb[1]
SS59889	Adult	Kaiyu Wang	Dickson	2	Y	No	No	10.1016/j.cub.2024.01.015	Lillvis; 2023	3032266	WN_LN_mixed		VT019896-x-BJD_dsx	w[1118]; P{y[+t7.7] w[+mC]=VT019896-p65.AD}attP40; TI{GAL4(DBD)::Zip-}dsx[GAL4(DBD)::Zip-]/TM6B, Tb[1]
SS64282	Adult	Kaiyu Wang	Dickson	1	N	No	No	10.1016/j.cub.2024.01.015	Lillvis; 2023	3035278	WN_LN_mixed		VT003155-x-VT028153	w[1118]; P{y[+t7.7] w[+mC]=VT003155-p65.AD}attP40; P{y[+t7.7] w[+mC]=VT028153-GAL4.DBD}attP2/TM6B, Tb[1]
SS74735	Adult	Kaiyu Wang	Dickson	1	N	No	No	10.1016/j.cub.2024.01.015	Lillvis; 2023	3040578	WN_LN_mixed		VT043702-x-VT018838	w[1118]; P{y[+t7.7] w[+mC]=VT043702-p65.AD}attP40/CyO; P{y[+t7.7] w[+mC]=VT018838-GAL4.DBD}attP2
SS74757	Adult	Kaiyu Wang	Dickson	2	N	No	No	10.1016/j.cub.2024.01.015	Lillvis; 2023	3040582	WN_LN_mixed		VT026999-x-GMR_21B02	w[1118]; P{y[+t7.7] w[+mC]=VT026999-p65.AD}attP40/CyO; P{y[+t7.7] w[+mC]=R21B02-GAL4.DBD}attP2
SS74760	Adult	Kaiyu Wang	Dickson	1	N	No	No	10.1016/j.cub.2024.01.015	Lillvis; 2023	3040580	WN_LN_mixed		VT026999-x-VT008681	w[1118]; P{y[+t7.7] w[+mC]=VT026999-p65.AD}attP40; P{y[+t7.7] w[+mC]=VT008681-GAL4.DBD}attP2
SS96091	Adult	DI	DI	2	N	No	No	10.1016/j.cub.2024.01.071	Cheong, Boone, Bennett; 2024	3043189	DNp54		VT056359-x-VT002021	w[1118]; P{y[+t7.7] w[+mC]=VT056359-p65.AD}attP40; P{y[+t7.7] w[+mC]=VT002021-GAL4.DBD}attP2/TM6B, Tb[1]
SS00688	Adult	Aljoscha Nern	Rubin	1	N	No	Yes	10.1016/j.neuron.2013.05.024	Tuthill, Nern; 2013	3007598	C3		GMR_26H02-x-GMR_29G11	w[1118]; P{y[+t7.7] w[+mC]=R26H02-p65.AD}attP40/CyO, P{w[+mC]=2xTb[1]-RFP}CyO; P{y[+t7.7] w[+mC]=R29G11-GAL4.DBD}attP2/TM6B, Tb[1]
SS00690	Adult	Aljoscha Nern	Rubin	1	N	No	No	10.1016/j.neuron.2013.05.024	Tuthill, Nern; 2013	3007600	L2		GMR_82F12-x-GMR_75H08	w[1118]; P{y[+t7.7] w[+mC]=R82F12-p65.AD}attP40/CyO; P{y[+t7.7] w[+mC]=R75H08-GAL4.DBD}attP2
SS00692	Adult	Aljoscha Nern	Rubin	1	N	No	No	10.1016/j.neuron.2013.05.024	Tuthill, Nern; 2013	3007602	L5		GMR_64B07-x-GMR_37E10	w[1118]; P{y[+t7.7] w[+mC]=R64B07-p65.AD}attP40; P{y[+t7.7] w[+mC]=R37E10-GAL4.DBD}attP2/TM6B, Tb[1]
SS00695	Adult	Aljoscha Nern	Rubin	2	N	No	No	10.1016/j.neuron.2013.05.024	Tuthill, Nern; 2013	3007605	L3		GMR_59A05-x-GMR_75H07	w[1118]; P{y[+t7.7] w[+mC]=R59A05-p65.AD}attP40; P{y[+t7.7] w[+mC]=R75H07-GAL4.DBD}attP2/TM6B, Tb[1]
SS00696	Adult	Aljoscha Nern	Rubin	2	N	No	No	10.1016/j.neuron.2013.05.024	Tuthill, Nern; 2013	3007606	L3		GMR_64B03-x-GMR_14B07	w[1118]; P{y[+t7.7] w[+mC]=R64B03-p65.AD}attP40/CyO; P{y[+t7.7] w[+mC]=R14B07-GAL4.DBD}attP2
SS00698	Adult	Aljoscha Nern	Rubin	2	N	No	No	10.1016/j.neuron.2013.05.024	Tuthill, Nern; 2013	3007608	Lawf2		GMR_11D03-x-GMR_19C10	w[1118]; P{y[+t7.7] w[+mC]=R11D03-p65.AD}attP40; P{y[+t7.7] w[+mC]=R19C10-GAL4.DBD}attP2
SS00700	Adult	Aljoscha Nern	Rubin	2	N	No	No	10.1016/j.neuron.2013.05.024	Tuthill, Nern; 2013	3007610	T1		GMR_31F10-x-GMR_65D07	w[1118]; P{y[+t7.7] w[+mC]=R31F10-p65.AD}attP40/CyO; P{y[+t7.7] w[+mC]=R65D07-GAL4.DBD}attP2
SS00771	Adult	Aljoscha Nern	Rubin	2	N	No	No	10.1016/j.neuron.2013.05.024	Tuthill, Nern; 2013	3026899	Lawf2		GMR_11D03-x-GMR_61H02	w[1118]; P{y[+t7.7] w[+mC]=R11D03-p65.AD}attP40; P{y[+t7.7] w[+mC]=R61H02-GAL4.DBD}attP2
SS00772	Adult	Aljoscha Nern	Rubin	2	N	No	No	10.1016/j.neuron.2013.05.024	Tuthill, Nern; 2013	3026900	Lawf1		GMR_11G01-x-GMR_17C11	w[1118]; P{y[+t7.7] w[+mC]=R11G01-p65.AD}attP40; P{y[+t7.7] w[+mC]=R17C11-GAL4.DBD}attP2
SS00778	Adult	Aljoscha Nern	Rubin	2	N	No	No	10.1016/j.neuron.2013.05.024	Tuthill, Nern; 2013	3026902	C2		GMR_20C11-x-GMR_25B02	w[1118]; P{y[+t7.7] w[+mC]=R20C11-p65.AD}attP40/CyO; P{y[+t7.7] w[+mC]=R25B02-GAL4.DBD}attP2
SS00779	Adult	Aljoscha Nern	Rubin	1	N	No	No	10.1016/j.neuron.2013.05.024	Tuthill, Nern; 2013	3026903	C2, C3		GMR_20C11-x-GMR_48D11	w[1118]; P{y[+t7.7] w[+mC]=R20C11-p65.AD}attP40/CyO; P{y[+t7.7] w[+mC]=R48D11-GAL4.DBD}attP2
SS00782	Adult	Aljoscha Nern	Rubin	2	N	No	No	10.1016/j.neuron.2013.05.024	Tuthill, Nern; 2013	3026904	L5		GMR_21A05-x-GMR_31H09	w[1118]; P{y[+t7.7] w[+mC]=R21A05-p65.AD}attP40/CyO; P{y[+t7.7] w[+mC]=R31H09-GAL4.DBD}attP2
SS00783	Adult	Aljoscha Nern	Rubin	1	N	No	No	10.1016/j.neuron.2013.05.024	Tuthill, Nern; 2013	3026905	C2		GMR_25B02-x-GMR_48D11	w[1118]; P{y[+t7.7] w[+mC]=R25B02-p65.AD}attP40; P{y[+t7.7] w[+mC]=R48D11-GAL4.DBD}attP2
SS00789	Adult	Aljoscha Nern	Rubin	1	N	No	No	10.1016/j.neuron.2013.05.024	Tuthill, Nern; 2013	3026906	L4		GMR_31C06-x-GMR_34G07	w[1118]; P{y[+t7.7] w[+mC]=R34G07-GAL4.DBD}attP2 P{y[+t7.7] w[+mC]=R31C06-p65.AD}su(Hw)attP2/TM3, Sb[1]
SS00790	Adult	Aljoscha Nern	Rubin	1	N	No	Yes	10.1016/j.neuron.2013.05.024	Tuthill, Nern; 2013	3026907	T1		GMR_31F10-x-GMR_30F10	w[1118]; P{y[+t7.7] w[+mC]=R31F10-p65.AD}attP40; P{y[+t7.7] w[+mC]=R30F10-GAL4.DBD}attP2
SS00792	Adult	Aljoscha Nern	Rubin	2	N	No	No	10.1016/j.neuron.2013.05.024	Tuthill, Nern; 2013	3026908	C3		GMR_35A03-x-GMR_29G11	w[1118]; P{y[+t7.7] w[+mC]=R35A03-p65.AD}attP40; P{y[+t7.7] w[+mC]=R29G11-GAL4.DBD}attP2
SS00797	Adult	Aljoscha Nern	Rubin	2	N	No	No	10.1016/j.neuron.2013.05.024	Tuthill, Nern; 2013	3026909	L1, L2		GMR_48A08-x-GMR_29G11	w[1118]; P{y[+t7.7] w[+mC]=R48A08-p65.AD}attP40/CyO; P{y[+t7.7] w[+mC]=R29G11-GAL4.DBD}attP2
SS00800	Adult	Aljoscha Nern	Rubin	2	N	No	No	10.1016/j.neuron.2013.05.024	Tuthill, Nern; 2013	3026910	Lawf1		GMR_52H01-x-GMR_17C11	w[1118]; P{y[+t7.7] w[+mC]=R52H01-p65.AD}attP40; P{y[+t7.7] w[+mC]=R17C11-GAL4.DBD}attP2
SS00801	Adult	Aljoscha Nern	Rubin	1	N	No	Yes	10.1016/j.neuron.2013.05.024	Tuthill, Nern; 2013	3026911	L1, L2		GMR_53G02-x-GMR_29G11	w[1118]; P{y[+t7.7] w[+mC]=R53G02-p65.AD}attP40/CyO; P{y[+t7.7] w[+mC]=R29G11-GAL4.DBD}attP2
SS00806	Adult	Aljoscha Nern	Rubin	1	N	No	No	10.1016/j.neuron.2013.05.024	Tuthill, Nern; 2013	3026912	L1		GMR_75H09-x-GMR_29G11	w[1118]; P{y[+t7.7] w[+mC]=R75H09-p65.AD}attP40; P{y[+t7.7] w[+mC]=R29G11-GAL4.DBD}attP2
SS00807	Adult	Aljoscha Nern	Rubin	1	N	No	No	10.1016/j.neuron.2013.05.024	Tuthill, Nern; 2013	3026913	Lai		GMR_92A10-x-GMR_66A02	w[1118]; P{y[+t7.7] w[+mC]=R92A10-p65.AD}attP40/CyO; P{y[+t7.7] w[+mC]=R66A02-GAL4.DBD}attP2/TM6B, Tb[1]
SS00808	Adult	Aljoscha Nern	Rubin	2	N	No	No	10.1016/j.neuron.2013.05.024	Tuthill, Nern; 2013	3026914	Lai		GMR_92A10-x-GMR_17D06	w[1118]; P{y[+t7.7] w[+mC]=R92A10-p65.AD}attP40; P{y[+t7.7] w[+mC]=R17D06-GAL4.DBD}attP2
SS51118	Adult	Kaiyu Wang	Dickson	2	N	No	No	10.1016/j.neuron.2014.05.017	Feng, Palfreyman; 2014	3015454	SAG		VT050405-x-VT007068	w; VT050405-p65ADZp in attP40; VT007068-ZpGdbd in attP2/TM6B
SS00300	Adult	Aljoscha Nern	Rubin	2	N	No	No	10.1016/j.neuron.2017.03.010	Strother; 2017	2502507	Tm3		GMR_13E12-x-GMR_59C10	w; 13E12-p65ADZp in attP40; 59C10-ZpGdbd in attP2
SS00313	Adult	Aljoscha Nern	Rubin	2	N	No	No	10.1016/j.neuron.2017.03.010	Strother; 2017	2502520	Tm3		GMR_38C11-x-GMR_59C10	w; 38C11-p65ADZp in attP40/CyO; 59C10-ZpGdbd in attP2
SS00316	Adult	Aljoscha Nern	Rubin	2	N	No	No	10.1016/j.neuron.2017.03.010	Strother; 2017	2502523	Mi4		GMR_48A07-x-GMR_79H02	w; 48A07-p65ADZp in attP40/CyO; 79H02-ZpGdbd in attP2
SS00324	Adult	Aljoscha Nern	Rubin	2	N	No	No	10.1016/j.neuron.2017.03.010	Strother; 2017	2502531	T4, T5		GMR_59E08-x-GMR_42F06	w; 59E08-p65ADZp in attP40; 42F06-ZpGdbd in attP2
SS00809	Adult	Aljoscha Nern	Rubin	1	N	No	No	10.1016/j.neuron.2017.03.010	Strother; 2017	3013454	Mi1		GMR_19F01-x-GMR_71D01	w; 19F01-p65ADZp in attP40; 71D01-ZpGdbd in attP2
SS00955	Adult	Aljoscha Nern	Rubin	2	N	No	No	10.1016/j.neuron.2017.03.010	Strother; 2017	3026915	Mi1		GMR_55C05-x-GMR_71D01	w; 55C05-p65ADZp in attP40; 71D01-ZpGdbd in attP2
SS01019	Adult	Aljoscha Nern	Rubin	2	N	No	No	10.1016/j.neuron.2017.03.010	Strother; 2017	3026916	Mi4		GMR_48A07-x-GMR_13F11	w; 48A07-p65ADZp in attP40; 13F11-ZpGdbd in attP2
SS02430	Adult	Aljoscha Nern	Rubin	2	N	No	No	10.1016/j.neuron.2017.03.010	Strother; 2017	3018381	Mi9		VT044843-x-VT046779	w; VT044843-p65ADZp in attP40; VT046779-ZpGdbd in attP2
SS02432	Adult	Aljoscha Nern	Rubin	2	N	No	No	10.1016/j.neuron.2017.03.010	Strother; 2017	3018383	Mi9		GMR_48A07-x-VT046779	w; 48A07-p65ADZp in attP40/CyO::Tb-RFP; VT046779-ZpGdbd in attP2
SS00356	Adult	Aljoscha Nern	Rubin	2	N	No	No	10.1016/j.neuron.2017.05.036	von Reyn; 2017	3000745	LC4		GMR_47H03-x-GMR_86D05	w[1118]; P{y[+t7.7] w[+mC]=R47H03-p65.AD}attP40; P{y[+t7.7] w[+mC]=R86D05-GAL4.DBD}attP2
SS02232	Adult	Tanya Wolff	Rubin	2	N	No	No	10.1016/j.neuron.2020.08.006	Turner-Evans; 2020	3018098	PEN_b(PEN2)		VT025720-x-VT043143	w; VT025720-p65ADZp in attP40; VT043143-ZpGdbd in attP2
SS62862	Adult	Tanya Wolff	Rubin	1	N	No	No	10.1016/j.neuron.2020.08.006	Turner-Evans; 2020	3034157	PEN_a(PEN1)		VT008135-x-GMR_37F06	w; VT008135-p65ADZp in attP40; 37F06-ZpGdbd in attP2
SS05037	Adult	Aljoscha Nern	Rubin	1	N	No	No	10.1016/j.neuron.2022.02.013	Klapoetke; 2022	3022096	LC21		GMR_85F11-x-GMR_45F08	w[1118]; P{y[+t7.7] w[+mC]=R85F11-p65.AD}attP40; P{y[+t7.7] w[+mC]=R45F08-GAL4.DBD}attP2
SS17689	Adult	Aljoscha Nern	Rubin	1	N	No	No	10.1016/j.neuron.2022.02.013	Klapoetke; 2022	3022209	LC21		GMR_50C03-x-GMR_41C05	w[1118]; P{y[+t7.7] w[+mC]=R50C03-p65.AD}attP40/CyO, P{w[+mC]=2xTb[1]-RFP}CyO; P{y[+t7.7] w[+mC]=R41C05-GAL4.DBD}attP2/TM6B, Tb[1]
OL0047B	Adult	Aljoscha Nern	Rubin	1	N	No	No	10.1038/nature24626	Klapoetke; 2017	2135419	LPLC2		GMR_19G02_XA_21-x-GMR_12E04_XD_01	w[1118]; P{y[+t7.7] w[+mC]=R19G02-p65.AD}attP40; P{y[+t7.7] w[+mC]=R12E04-GAL4.DBD}attP2
SS00810	Adult	Aljoscha Nern	Rubin	1	N	No	No	10.1038/nature24626	Klapoetke; 2017	3013455	T4, T5		GMR_28D05-x-GMR_55H05	w; 28D05-p65ADZp in attP40; 55H05-ZpGdbd in attP2
SS03752	Adult	Aljoscha Nern	Rubin	3	N	No	No	10.1038/nature24626	Klapoetke; 2017	3020275	LPi43		GMR_38G02-x-GMR_24A07	w; 38G02-p65ADZp in attP40/CyO::Tb-RFP; 24A07-ZpGdbd in attP2/TM6B
SS27416	Adult	Ryo Minegishi	Dickson	1	N	No	No	10.1038/s41467-020-19936-x	Feng; 2020	3028370	LBL49, LBL52		GMR_73B05-x-GMR_42H01	w[1118]; P{y[+t7.7] w[+mC]=R73B05-p65.AD}attP40; P{y[+t7.7] w[+mC]=R42H01-GAL4.DBD}attP2
SS32496	Adult	Ryo Minegishi	Dickson	1	N	No	No	10.1038/s41467-020-19936-x	Feng; 2020	3028973	LUL89		GMR_72E10-x-VT049904	w[1118]; P{y[+t7.7] w[+mC]=R72E10-p65.AD}attP40/CyO; P{y[+t7.7] w[+mC]=VT049904-GAL4.DBD}attP2
SS33343	Adult	Ryo Minegishi	Dickson	1	N	Yes	No	10.1038/s41467-020-19936-x	Feng; 2020	3028487	LUL92, LUL93, LUL97, LUL100		VT043924-x-VT044964	w[1118]; P{y[+t7.7] w[+mC]=VT043924-p65.AD}attP40/CyO, P{w[+mC]=2xTb[1]-RFP}CyO; P{y[+t7.7] w[+mC]=VT044964-GAL4.DBD}attP2
SS33510	Adult	Ryo Minegishi	Dickson	1	N	No	No	10.1038/s41467-020-19936-x	Feng; 2020	3028996	LBL9		VT033629-x-VT021799	w[1118]; P{y[+t7.7] w[+mC]=VT033629-p65.AD}attP40/CyO; P{y[+t7.7] w[+mC]=VT021799-GAL4.DBD}attP2
SS33542	Adult	Ryo Minegishi	Dickson	1	N	No	No	10.1038/s41467-020-19936-x	Feng; 2020	3028382	LBL19, LUL89, LUL92, LUL97, LUL100, LUL105		VT044964-x-VT023795	w[1118]; P{y[+t7.7] w[+mC]=VT044964-p65.AD}attP40; P{y[+t7.7] w[+mC]=VT023795-GAL4.DBD}attP2
SS35560	Adult	Ryo Minegishi	Dickson	1	N	No	No	10.1038/s41467-020-19936-x	Feng; 2020	3029036	LBL53, LBL54		GMR_77B09-x-GMR_72C08	w[1118]; P{y[+t7.7] w[+mC]=R77B09-p65.AD}attP40; P{y[+t7.7] w[+mC]=R72C08-GAL4.DBD}attP2
SS36194	Adult	Ryo Minegishi	Dickson	2	N	No	No	10.1038/s41467-020-19936-x	Feng; 2020	3029364	LUL55, LUL145		GMR_92A10-x-VT019902	w; 92A10-p65ADZp in attP40; VT019902-ZpGdbd in attP2
SS39036	Adult	Ryo Minegishi	Dickson	2	N	No	No	10.1038/s41467-020-19936-x	Feng; 2020	3032053	LBA73		VT063303-x-VT063741	w[1118]; P{y[+t7.7] w[+mC]=VT063303-p65.AD}attP40; P{y[+t7.7] w[+mC]=VT063741-GAL4.DBD}attP2
SS43697	Adult	Ryo Minegishi	Dickson	2	N	No	No	10.1038/s41467-020-19936-x	Feng; 2020	3030989	LBL57		GMR_78A01-x-VT009084	w[1118]; P{y[+t7.7] w[+mC]=R78A01-p65.AD}attP40; P{y[+t7.7] w[+mC]=VT009084-GAL4.DBD}attP2
SS44225	Adult	Ryo Minegishi	Dickson	2	N	No	No	10.1038/s41467-020-19936-x	Feng; 2020	3028488	LBI70		VT064563-x-VT000254	w[1118]; P{y[+t7.7] w[+mC]=VT064563-p65.AD}attP40; P{y[+t7.7] w[+mC]=VT000254-GAL4.DBD}attP2
SS44254	Adult	Ryo Minegishi	Dickson	2	N	No	No	10.1038/s41467-020-19936-x	Feng; 2020	3029468	LUL50, LUL55, LUL145		VT065322-x-VT019902	w; VT065322-p65ADZp in attP40; VT019902-ZpGdbd in attP2/TM6B
SS44255	Adult	Ryo Minegishi	Dickson	1	N	Yes	No	10.1038/s41467-020-19936-x	Feng; 2020	3029492	LUL50, LUL145		VT065322-x-GMR_92A10	w[1118]; P{y[+t7.7] w[+mC]=VT065322-p65.AD}attP40; P{y[+t7.7] w[+mC]=R92A10-GAL4.DBD}attP2
SS46225	Adult	Ryo Minegishi	Dickson	1	N	Yes	No	10.1038/s41467-020-19936-x	Feng; 2020	3029443	LBI64		VT005404-x-VT000254	w[1118]; P{y[+t7.7] w[+mC]=VT005404-p65.AD}attP40; P{y[+t7.7] w[+mC]=VT000254-GAL4.DBD}attP2
SS46229	Adult	Ryo Minegishi	Dickson	2	N	No	No	10.1038/s41467-020-19936-x	Feng; 2020	3029427	LBL37, LUL108, LUL152		VT033616-x-VT008473	w[1118]; P{y[+t7.7] w[+mC]=VT033616-p65.AD}attP40; P{y[+t7.7] w[+mC]=VT008473-GAL4.DBD}attP2
SS46233	Adult	Ryo Minegishi	Dickson	2	N	No	No	10.1038/s41467-020-19936-x	Feng; 2020	3029327	LBA29, LUI22, LUI1		VT029814-x-VT028464	w[1118]; P{y[+t7.7] w[+mC]=VT029814-p65.AD}attP40; P{y[+t7.7] w[+mC]=VT028464-GAL4.DBD}attP2
SS46243	Adult	Ryo Minegishi	Dickson	3	N	No	No	10.1038/s41467-020-19936-x	Feng; 2020	3028670	LBL40		VT006480-x-GMR_24A02	w[1118]; P{y[+t7.7] w[+mC]=VT006480-p65.AD}attP40; P{y[+t7.7] w[+mC]=R24A02-GAL4.DBD}attP2/TM6B, Tb[1]
SS46253	Adult	Ryo Minegishi	Dickson	2	N	No	No	10.1038/s41467-020-19936-x	Feng; 2020	3032929	LBL40		GMR_24A02-x-VT006480	w[1118]; P{y[+t7.7] w[+mC]=R24A02-p65.AD}attP40; P{y[+t7.7] w[+mC]=VT006480-GAL4.DBD}attP2
SS46258	Adult	Ryo Minegishi	Dickson	2	N	No	No	10.1038/s41467-020-19936-x	Feng; 2020	3029172	LUL124, LUL152		GMR_31H09-x-VT020829	w[1118]; P{y[+t7.7] w[+mC]=R31H09-p65.AD}JK22C; P{y[+t7.7] w[+mC]=VT020829-GAL4.DBD}attP2
SS46300	Adult	Ryo Minegishi	Dickson	2	N	No	No	10.1038/s41467-020-19936-x	Feng; 2020	3028636	LBI64		VT043146-x-VT000254	w[1118]; P{y[+t7.7] w[+mC]=VT043146-p65.AD}attP40/CyO, P{w[+mC]=2xTb[1]-RFP}CyO; P{y[+t7.7] w[+mC]=VT000254-GAL4.DBD}attP2
SS46669	Adult	Ryo Minegishi	Dickson	2	N	No	No	10.1038/s41467-020-19936-x	Feng; 2020	3029354	LUI15		VT026777-x-VT049125	w; VT026777-p65ADZp in attP40; VT049125-ZpGdbd in attP2
SS46730	Adult	Ryo Minegishi	Dickson	1	N	Yes	No	10.1038/s41467-020-19936-x	Feng; 2020	3029087	LUI12, LUL24		VT037566-x-VT008808	w; VT037566-p65ADZp in attP40; VT008808-ZpGdbd in attP2
SS47847	Adult	Ryo Minegishi	Dickson	1	N	Yes	No	10.1038/s41467-020-19936-x	Feng; 2020	3031743	LUL89		VT058873-x-VT058566	w[1118]; P{y[+t7.7] w[+mC]=VT058873-p65.AD}attP40; P{y[+t7.7] w[+mC]=VT058566-GAL4.DBD}attP2
SS47863	Adult	Ryo Minegishi	Dickson	2	N	No	No	10.1038/s41467-020-19936-x	Feng; 2020	3029100	LUL89		GMR_15D08-x-GMR_72E10	w[1118]; P{y[+t7.7] w[+mC]=R15D08-p65.AD}attP40; P{y[+t7.7] w[+mC]=R72E10-GAL4.DBD}attP2
SS47921	Adult	Ryo Minegishi	Dickson	1	N	Yes	No	10.1038/s41467-020-19936-x	Feng; 2020	3031857	LBL40		VT021418-x-GMR_24A02	w[1118]; P{y[+t7.7] w[+mC]=VT021418-p65.AD}attP40/CyO, P{w[+mC]=2xTb[1]-RFP}CyO; P{y[+t7.7] w[+mC]=R24A02-GAL4.DBD}attP2
SS47938	Adult	Ryo Minegishi	Dickson	1	N	Yes	No	10.1038/s41467-020-19936-x	Feng; 2020	3031808	LBL40		GMR_24A02-x-VT021418	w[1118]; P{y[+t7.7] w[+mC]=R24A02-p65.AD}attP40; P{y[+t7.7] w[+mC]=VT021418-GAL4.DBD}attP2
SS48376	Adult	Ryo Minegishi	Dickson	1	N	No	No	10.1038/s41467-020-19936-x	Feng; 2020	3031821	LUL24		VT008808-x-VT048646	w[1118]; P{y[+t7.7] w[+mC]=VT008808-p65.AD}attP40; P{y[+t7.7] w[+mC]=VT048646-GAL4.DBD}attP2
SS48718	Adult	Ryo Minegishi	Dickson	1	N	Yes	No	10.1038/s41467-020-19936-x	Feng; 2020	3031834	LBI70		GMR_75B10-x-GMR_94E11	w[1118]; P{y[+t7.7] w[+mC]=R75B10-p65.AD}attP40; P{y[+t7.7] w[+mC]=R94E11-GAL4.DBD}attP2/TM6B, Tb[1]
SS50974	Adult	Ryo Minegishi	Dickson	1	N	Yes	No	10.1038/s41467-020-19936-x	Feng; 2020	3030474	LUL130		VT062245-x-VT050105	w[1118]; P{y[+t7.7] w[+mC]=VT062245-p65.AD}attP40/CyO, P{w[+mC]=2xTb[1]-RFP}CyO; P{y[+t7.7] w[+mC]=VT050105-GAL4.DBD}attP2
SS50975	Adult	Ryo Minegishi	Dickson	1	N	Yes	No	10.1038/s41467-020-19936-x	Feng; 2020	3030470	LUL130		VT062245-x-VT021374	w[1118]; P{y[+t7.7] w[+mC]=VT062245-p65.AD}attP40; P{y[+t7.7] w[+mC]=VT021374-GAL4.DBD}attP2
SS50995	Adult	Ryo Minegishi	Dickson	2	N	No	No	10.1038/s41467-020-19936-x	Feng; 2020	3030468	LBL9		GMR_24A02-x-VT000360	w[1118]; P{y[+t7.7] w[+mC]=R24A02-p65.AD}attP40; P{y[+t7.7] w[+mC]=VT000360-GAL4.DBD}attP2
SS50996	Adult	Ryo Minegishi	Dickson	2	N	No	No	10.1038/s41467-020-19936-x	Feng; 2020	3030479	MN		GMR_31H05-x-VT011123	w[1118]; P{y[+t7.7] w[+mC]=R31H05-p65.AD}attP40; P{y[+t7.7] w[+mC]=VT011123-GAL4.DBD}attP2
SS51817	Adult	Ryo Minegishi	Dickson	1	N	Yes	No	10.1038/s41467-020-19936-x	Feng; 2020	3031421	LUL130		VT024602-x-VT021374	w[1118]; P{y[+t7.7] w[+mC]=VT024602-p65.AD}attP40; P{y[+t7.7] w[+mC]=VT021374-GAL4.DBD}attP2
SS51843	Adult	Ryo Minegishi	Dickson	4	N	No	No	10.1038/s41467-020-19936-x	Feng; 2020	3031812	LBI62, LBL40, LUI2		VT021418-x-VT012717	w[1118]; P{y[+t7.7] w[+mC]=VT021418-p65.AD}attP40; P{y[+t7.7] w[+mC]=VT012717-GAL4.DBD}attP2
SS51877	Adult	Ryo Minegishi	Dickson	2	N	No	No	10.1038/s41467-020-19936-x	Feng; 2020	3031825	LUL24		GMR_23G01-x-VT037810	w[1118]; P{y[+t7.7] w[+mC]=R23G01-p65.AD}attP40; P{y[+t7.7] w[+mC]=VT037810-GAL4.DBD}attP2
SS51891	Adult	Ryo Minegishi	Dickson	2	N	No	No	10.1038/s41467-020-19936-x	Feng; 2020	3031824	LUL24		GMR_28F07-x-VT008808	w; 28F07-p65ADZp in attP40/CyO::Tb-RFP; VT008808-ZpGdbd in attP2
SS51895	Adult	Ryo Minegishi	Dickson	1	N	Yes	No	10.1038/s41467-020-19936-x	Feng; 2020	3031823	LUI22, LUL174		GMR_47A08-x-VT029814	w[1118]; P{y[+t7.7] w[+mC]=R47A08-p65.AD}JK22C; P{y[+t7.7] w[+mC]=VT029814-GAL4.DBD}attP2/TM6B, Tb[1]
SS51907	Adult	Ryo Minegishi	Dickson	1	N	No	No	10.1038/s41467-020-19936-x	Feng; 2020	3031809	LBL40		GMR_70E04-x-VT021418	w[1118]; P{y[+t7.7] w[+mC]=R70E04-p65.AD}attP40; P{y[+t7.7] w[+mC]=VT021418-GAL4.DBD}attP2
SS53029	Adult	Ryo Minegishi	Dickson	2	N	No	No	10.1038/s41467-020-19936-x	Feng; 2020	3034258	LBL22, LUI4		GMR_24E12-x-VT019345	w[1118]; P{y[+t7.7] w[+mC]=R24E12-p65.AD}attP40; P{y[+t7.7] w[+mC]=VT019345-GAL4.DBD}attP2
SS53030	Adult	Ryo Minegishi	Dickson	2	N	No	No	10.1038/s41467-020-19936-x	Feng; 2020	3034259	LBL22, LBL41		GMR_24E12-x-VT048146	w[1118]; P{y[+t7.7] w[+mC]=R24E12-p65.AD}attP40; P{y[+t7.7] w[+mC]=VT048146-GAL4.DBD}attP2
SS53050	Adult	Ryo Minegishi	Dickson	1	N	No	No	10.1038/s41467-020-19936-x	Feng; 2020	3034264	MN		GMR_81A04-x-GMR_81A06	w[1118]; P{y[+t7.7] w[+mC]=R81A04-p65.AD}attP40; P{y[+t7.7] w[+mC]=R81A06-GAL4.DBD}attP2
SS53903	Adult	Ryo Minegishi	Dickson	2	N	No	No	10.1038/s41467-020-19936-x	Feng; 2020	3034247	LBL22		VT002081-x-VT019345	w[1118]; P{y[+t7.7] w[+mC]=VT002081-p65.AD}attP40/CyO, P{w[+mC]=2xTb[1]-RFP}CyO; P{y[+t7.7] w[+mC]=VT019345-GAL4.DBD}attP2
SS57939	Adult	Ryo Minegishi	Dickson	1	N	Yes	No	10.1038/s41467-020-19936-x	Feng; 2020	3032063	LUI22		VT029814-x-VT049340	w[1118]; P{y[+t7.7] w[+mC]=VT029814-p65.AD}attP40; P{y[+t7.7] w[+mC]=VT049340-GAL4.DBD}attP2
SS57941	Adult	Ryo Minegishi	Dickson	1	N	No	No	10.1038/s41467-020-19936-x	Feng; 2020	3032060	LBA39, LUL62		VT049362-x-VT021374	w[1118]; P{y[+t7.7] w[+mC]=VT049362-p65.AD}attP40; P{y[+t7.7] w[+mC]=VT021374-GAL4.DBD}attP2
SS57954	Adult	Ryo Minegishi	Dickson	2	N	No	No	10.1038/s41467-020-19936-x	Feng; 2020	3032049	LUI22		VT029814-x-VT025717	w[1118]; P{y[+t7.7] w[+mC]=VT029814-p65.AD}attP40; P{y[+t7.7] w[+mC]=VT025717-GAL4.DBD}attP2
SS57955	Adult	Ryo Minegishi	Dickson	1	N	Yes	No	10.1038/s41467-020-19936-x	Feng; 2020	3032050	LUI22		VT019307-x-VT025717	w[1118]; P{y[+t7.7] w[+mC]=VT019307-p65.AD}attP40; P{y[+t7.7] w[+mC]=VT025717-GAL4.DBD}attP2
SS57977	Adult	Ryo Minegishi	Dickson	2	N	No	No	10.1038/s41467-020-19936-x	Feng; 2020	3032059	LUL24		VT062633-x-VT008808	w[1118]; P{y[+t7.7] w[+mC]=VT062633-p65.AD}attP40/CyO, P{w[+mC]=2xTb[1]-RFP}CyO; P{y[+t7.7] w[+mC]=VT008808-GAL4.DBD}attP2
SS58000	Adult	Ryo Minegishi	Dickson	2	N	No	No	10.1038/s41467-020-19936-x	Feng; 2020	3032074	LUL24		VT062633-x-GMR_28F07	w[1118]; P{y[+t7.7] w[+mC]=VT062633-p65.AD}attP40/CyO, P{w[+mC]=2xTb[1]-RFP}CyO; P{y[+t7.7] w[+mC]=R28F07-GAL4.DBD}attP2
SS58002	Adult	Ryo Minegishi	Dickson	2	N	No	No	10.1038/s41467-020-19936-x	Feng; 2020	3032069	LBL37, LUL152		VT045608-x-GMR_70B03	w[1118]; P{y[+t7.7] w[+mC]=VT045608-p65.AD}attP40; P{y[+t7.7] w[+mC]=R70B03-GAL4.DBD}attP2
SS58005	Adult	Ryo Minegishi	Dickson	2	N	No	No	10.1038/s41467-020-19936-x	Feng; 2020	3032070	LUL151, LUL152		VT036874-x-GMR_70B03	w[1118]; P{y[+t7.7] w[+mC]=VT036874-p65.AD}attP40; P{y[+t7.7] w[+mC]=R70B03-GAL4.DBD}attP2/TM6B, Tb[1]
SS58006	Adult	Ryo Minegishi	Dickson	2	N	No	No	10.1038/s41467-020-19936-x	Feng; 2020	3032076	LUL55, LUL145		VT019902-x-GMR_72D01	w[1118]; P{y[+t7.7] w[+mC]=VT019902-p65.AD}attP40; P{y[+t7.7] w[+mC]=R72D01-GAL4.DBD}attP2
SS59209	Adult	Ryo Minegishi	Dickson	1	N	No	No	10.1038/s41467-020-19936-x	Feng; 2020	3034165	LBA22, LBI64		VT041421-x-VT000254	w[1118]; P{y[+t7.7] w[+mC]=VT041421-p65.AD}attP40/CyO, P{2xTb[1]-RFP}CyO; P{y[+t7.7] w[+mC]=VT000254-GAL4.DBD}attP2
SS59225	Adult	Ryo Minegishi	Dickson	1	N	No	No	10.1038/s41467-020-19936-x	Feng; 2020	3034174	LBI65, LBI66		VT006545-x-GMR_29G03	w[1118]; P{y[+t7.7] w[+mC]=VT006545-p65.AD}attP40; P{y[+t7.7] w[+mC]=R29G03-GAL4.DBD}attP2
SS59229	Adult	Ryo Minegishi	Dickson	1	N	No	No	10.1038/s41467-020-19936-x	Feng; 2020	3034190	LBL34		VT033282-x-GMR_75H07	w[1118]; P{y[+t7.7] w[+mC]=VT033282-p65.AD}attP40; P{y[+t7.7] w[+mC]=R75H07-GAL4.DBD}attP2
SS59230	Adult	Ryo Minegishi	Dickson	1	N	No	No	10.1038/s41467-020-19936-x	Feng; 2020	3035835	LBI58, LBL34, LBL51		VT012719-x-GMR_75H07	w[1118]; P{y[+t7.7] w[+mC]=VT012719-p65.AD}attP40; P{y[+t7.7] w[+mC]=R75H07-GAL4.DBD}attP2
SS60232	Adult	Ryo Minegishi	Dickson	2	N	No	No	10.1038/s41467-020-19936-x	Feng; 2020	3036733	LUL130, LUL163, LUL173		VT006555-x-VT002075	w[1118]; P{y[+t7.7] w[+mC]=VT006555-p65.AD}attP40; P{y[+t7.7] w[+mC]=VT002075-GAL4.DBD}attP2/TM6B, Tb[1]
SS60234	Adult	Ryo Minegishi	Dickson	1	N	Yes	No	10.1038/s41467-020-19936-x	Feng; 2020	3034179	LUL112, LUL173		VT006555-x-VT050105	w[1118]; P{y[+t7.7] w[+mC]=VT006555-p65.AD}attP40; P{y[+t7.7] w[+mC]=VT050105-GAL4.DBD}attP2
SS60585	Adult	Ryo Minegishi	Dickson	1	N	No	No	10.1038/s41467-020-19936-x	Feng; 2020	3034173	LBL57		VT001497-x-VT049903	w[1118]; P{y[+t7.7] w[+mC]=VT001497-p65.AD}attP40; P{y[+t7.7] w[+mC]=VT049903-GAL4.DBD}attP2
SS62148	Adult	Ryo Minegishi	Dickson	2	N	No	No	10.1038/s41467-020-19936-x	Feng; 2020	3035797	LUA28-3		VT026993-x-VT044492	w[1118]; P{y[+t7.7] w[+mC]=VT026993-p65.AD}attP40; P{y[+t7.7] w[+mC]=VT044492-GAL4.DBD}attP2
SS62883	Adult	Ryo Minegishi	Dickson	1	N	No	No	10.1038/s41467-020-19936-x	Feng; 2020	3034176	LUA27		VT002223-x-VT004419	w[1118]; P{y[+t7.7] w[+mC]=VT002223-p65.AD}attP40; P{y[+t7.7] w[+mC]=VT004419-GAL4.DBD}attP2
SS63843	Adult	Ryo Minegishi	Dickson	2	N	No	No	10.1038/s41467-020-19936-x	Feng; 2020	3035840	LUI22		VT019307-x-GMR_50C03	w[1118]; P{y[+t7.7] w[+mC]=VT019307-p65.AD}attP40; P{y[+t7.7] w[+mC]=R50C03-GAL4.DBD}attP2
SS64165	Adult	Ryo Minegishi	Dickson	1	N	No	No	10.1038/s41467-020-19936-x	Feng; 2020	3035837	LUA27		VT002223-x-GMR_21E02	w[1118]; P{y[+t7.7] w[+mC]=VT002223-p65.AD}attP40; P{y[+t7.7] w[+mC]=R21E02-GAL4.DBD}attP2
SS64167	Adult	Ryo Minegishi	Dickson	2	N	No	No	10.1038/s41467-020-19936-x	Feng; 2020	3035843	LBA34, LBA68		GMR_78A04-x-GMR_24B11	w[1118]; P{y[+t7.7] w[+mC]=R78A04-p65.AD}attP40; P{y[+t7.7] w[+mC]=R24B11-GAL4.DBD}attP2
SS64172	Adult	Ryo Minegishi	Dickson	3	N	No	No	10.1038/s41467-020-19936-x	Feng; 2020	3035822	MF17		VT044843-x-VT008808	w[1118]; P{y[+t7.7] w[+mC]=VT044843-p65.AD}attP40; P{y[+t7.7] w[+mC]=VT008808-GAL4.DBD}attP2
SS64179	Adult	Ryo Minegishi	Dickson	1	N	No	No	10.1038/s41467-020-19936-x	Feng; 2020	3035844	LBA68		VT056808-x-GMR_24B11	w[1118]; P{y[+t7.7] w[+mC]=VT056808-p65.AD}attP40; P{y[+t7.7] w[+mC]=R24B11-GAL4.DBD}attP2
SS64188	Adult	Ryo Minegishi	Dickson	1	N	No	No	10.1038/s41467-020-19936-x	Feng; 2020	3035819	LBA25, LUI21		VT058545-x-VT016278	w[1118]; P{y[+t7.7] w[+mC]=VT058545-p65.AD}attP40; P{y[+t7.7] w[+mC]=VT016278-GAL4.DBD}attP2
SS64190	Adult	Ryo Minegishi	Dickson	2	N	No	No	10.1038/s41467-020-19936-x	Feng; 2020	3035802	LUL130, LUL141, LUL175		VT009674-x-VT021842	w[1118]; P{y[+t7.7] w[+mC]=VT009674-p65.AD}attP40/CyO, P{w[+mC]=2xTb[1]-RFP}CyO; P{y[+t7.7] w[+mC]=VT021842-GAL4.DBD}attP2
SS64214	Adult	Ryo Minegishi	Dickson	2	N	No	No	10.1038/s41467-020-19936-x	Feng; 2020	3035829	LBA34, LBA68		GMR_24B11-x-GMR_78A04	w[1118]; P{y[+t7.7] w[+mC]=R24B11-p65.AD}attP40; P{y[+t7.7] w[+mC]=R78A04-GAL4.DBD}attP2
SS64225	Adult	Ryo Minegishi	Dickson	1	N	Yes	No	10.1038/s41467-020-19936-x	Feng; 2020	3035821	LUI21, LUL18		GMR_19D12-x-VT058545	w[1118]; P{y[+t7.7] w[+mC]=R19D12-p65.AD}attP40; P{y[+t7.7] w[+mC]=VT058545-GAL4.DBD}attP2
SS64234	Adult	Ryo Minegishi	Dickson	2	N	No	No	10.1038/s41467-020-19936-x	Feng; 2020	3035792	LBI32		VT008808-x-VT002042	w[1118]; P{y[+t7.7] w[+mC]=VT008808-p65.AD}attP40; P{y[+t7.7] w[+mC]=VT002042-GAL4.DBD}attP2
SS65706	Adult	Ryo Minegishi	Dickson	1	N	No	No	10.1038/s41467-020-19936-x	Feng; 2020	3036564	LBI60, LBI72		VT024647-x-VT049344	w[1118]; P{y[+t7.7] w[+mC]=VT024647-p65.AD}attP40; P{y[+t7.7] w[+mC]=VT049344-GAL4.DBD}attP2
SS65713	Adult	Ryo Minegishi	Dickson	1	N	Yes	No	10.1038/s41467-020-19936-x	Feng; 2020	3036562	LBI60		VT045636-x-VT024647	w[1118]; P{y[+t7.7] w[+mC]=VT045636-p65.AD}attP40; P{y[+t7.7] w[+mC]=VT024647-GAL4.DBD}attP2
SS67323	Adult	Ryo Minegishi	Dickson	2	N	No	No	10.1038/s41467-020-19936-x	Feng; 2020	3036596	LUI15		VT014336-x-GMR_20F06	w[1118]; P{y[+t7.7] w[+mC]=VT014336-p65.AD}attP40/CyO, P{w[+mC]=2xTb[1]-RFP}CyO; P{y[+t7.7] w[+mC]=R20F06-GAL4.DBD}attP2
SS67324	Adult	Ryo Minegishi	Dickson	2	Y	No	No	10.1038/s41467-020-19936-x	Feng; 2020	3036533	LUI15		VT014336-x-GMR_81A06	w[1118]; P{y[+t7.7] w[+mC]=VT014336-p65.AD}attP40; P{y[+t7.7] w[+mC]=R81A06-GAL4.DBD}attP2
SS67354	Adult	Ryo Minegishi	Dickson	2	N	No	No	10.1038/s41467-020-19936-x	Feng; 2020	3036569	LBI60		VT040713-x-VT045636	w[1118]; P{y[+t7.7] w[+mC]=VT040713-p65.AD}attP40; P{y[+t7.7] w[+mC]=VT045636-GAL4.DBD}attP2/TM6, Tb[1]
SS67423	Adult	Ryo Minegishi	Dickson	1	N	Yes	No	10.1038/s41467-020-19936-x	Feng; 2020	3036534	LUI15		GMR_20F06-x-GMR_81A06	w[1118]; P{y[+t7.7] w[+mC]=R20F06-p65.AD}attP40; P{y[+t7.7] w[+mC]=R81A06-GAL4.DBD}attP2
SS67463	Adult	Ryo Minegishi	Dickson	2	N	No	No	10.1038/s41467-020-19936-x	Feng; 2020	3036599	MF28		GMR_59F08-x-GMR_45E06	w[1118]; P{y[+t7.7] w[+mC]=R59F08-p65.AD}attP40; P{y[+t7.7] w[+mC]=R45E06-GAL4.DBD}attP2/TM6B, Tb[1]
SS67466	Adult	Ryo Minegishi	Dickson	2	N	No	No	10.1038/s41467-020-19936-x	Feng; 2020	3036526	LBI70		GMR_65E11-x-VT000353	w[1118]; P{y[+t7.7] w[+mC]=R65E11-p65.AD}attP40; P{y[+t7.7] w[+mC]=VT000353-GAL4.DBD}attP2
SS67472	Adult	Ryo Minegishi	Dickson	2	N	No	No	10.1038/s41467-020-19936-x	Feng; 2020	3036550	LUI15		GMR_82F02-x-VT049125	w[1118]; P{y[+t7.7] w[+mC]=R82F02-p65.AD}attP40; P{y[+t7.7] w[+mC]=VT049125-GAL4.DBD}attP2
SS67878	Adult	Ryo Minegishi	Dickson	2	N	No	No	10.1038/s41467-020-19936-x	Feng; 2020	3036736	MF19		VT001608-x-VT014554	w[1118]; P{y[+t7.7] w[+mC]=VT001608-p65.AD}attP40/CyO, P{w[+mC]=2xTb[1]-RFP}CyO; P{y[+t7.7] w[+mC]=VT014554-GAL4.DBD}attP2
SS67907	Adult	Ryo Minegishi	Dickson	2	N	No	No	10.1038/s41467-020-19936-x	Feng; 2020	3036724	MF18		VT039419-x-VT014974	w[1118]; P{y[+t7.7] w[+mC]=VT039419-p65.AD}attP40; P{y[+t7.7] w[+mC]=VT014974-GAL4.DBD}attP2
SS03696	Adult	Aljoscha Nern	Rubin	2	N	No	No	10.1038/s41467-023-43566-8	Longden; 2023	3020219	L1		GMR_40F12-x-VT027316	w[1118]; P{y[+t7.7] w[+mC]=R40F12-p65.AD}attP40/CyO, P{w[+mC]=2xTb[1]-RFP}CyO; P{y[+t7.7] w[+mC]=VT027316-GAL4.DBD}attP2
SS01491	Adult	Kaiyu Wang	Dickson	1	N	No	No	10.1038/s41586-020-2055-9	Wang, Wang; 2020	3016790	pC1		VT002064-x-VT008469	w; VT002064-p65ADZp in attP40; VT008469-ZpGdbd in attP2/TM6B
SS35666	Adult	Kaiyu Wang	Dickson	1	N	No	No	10.1038/s41586-020-2055-9	Wang, Wang; 2020	3025829	oviDN		VT026873-x-VT040574	w; VT026873-p65ADZp in attP40; VT040574-ZpGdbd in attP2/TM6B
SS46540	Adult	Kaiyu Wang	Dickson	1	Y	No	No	10.1038/s41586-020-2055-9	Wang, Wang; 2020	3038944	oviDN		VT050660-x-VT028160	w; VT050660-p65ADZp in attP40; VT028160-ZpGdbd in attP2
SS49443	Adult	Kaiyu Wang	Dickson	2	N	No	No	10.1038/s41586-020-2055-9	Wang, Wang; 2020	3035323	oviEN		VT034612-x-VT050229	w; 34612-p65ADZp in attP40/CyO; VT050229-ZpGdbd in attP2/TM6B
SS50910	Adult	Kaiyu Wang	Dickson	2	Y	No	No	10.1038/s41586-020-2055-9	Wang, Wang; 2020	3027887	SPSN		VT058873-x-VT003280	w; 58873-p65ADZp in attP40/CyO; VT003280-ZpGdbd in attP2/TM6B
SS59911	Adult	Kaiyu Wang	Dickson	1	Y	No	No	10.1038/s41586-020-2055-9	Wang, Wang; 2020	3032288	pC1		VT002064-x-BJD_dsx	w; VT002064-p65ADZp in attP2, dsx-ZpGdbd/TM6B
SS65422	Adult	Kaiyu Wang	Dickson	2	N	No	No	10.1038/s41586-020-2055-9	Wang, Wang; 2020	3035317	oviIN	423101189, 485934965	GMR_68A10-x-VT010054	w; 68A10-p65ADZp in attP40/CyO; VT010054-ZpGdbd in attP2/TM6B
SS65423	Adult	Kaiyu Wang	Dickson	2	N	No	No	10.1038/s41586-020-2055-9	Wang, Wang; 2020	3035318	oviIN	423101189, 485934965	VT026347-x-VT026035	w; 26347-p65ADZp in attP40/CyO; VT026035-ZpGdbd in attP2/TM6B
SS65426	Adult	Kaiyu Wang	Dickson	2	N	No	No	10.1038/s41586-020-2055-9	Wang, Wang; 2020	3035321	oviIN	423101189, 485934965	VT043086-x-VT034612	w; 43086-p65ADZp in attP40/CyO; VT034612-ZpGdbd in attP2/TM6B
SS50200	Adult	Kaiyu Wang	Dickson	2	Y	No	No	10.1038/s41586-020-2972-7	Wang, Wang; 2021	3028340	vpoDN	5813057864	GMR_31D07-x-GMR_52F12	w; 31D07-p65ADZp in attP40/CyO; 52F12-ZpGdbd in attP2
SS50795	Adult	Kaiyu Wang	Dickson	1	Y	No	No	10.1038/s41586-020-2972-7	Wang, Wang; 2021	3028346	vpoDN	5813057864	VT045670-x-GMR_52F12	w; 45670-p65ADZp in attP40/CyO; 52F12-ZpGdbd in attP2
SS50911	Adult	Kaiyu Wang	Dickson	3	Y	No	No	10.1038/s41586-020-2972-7	Wang, Wang; 2021	3027888	SPSN		VT058873-x-VT033490	w; VT058873-p65ADZp in attP40; VT033490-ZpGdbd in attP2
SS57877	Adult	Kaiyu Wang	Dickson	2	N	No	No	10.1038/s41586-020-2972-7	Wang, Wang; 2021	3030964	vpoIN		VT058716-x-VT008473	w; VT058716-p65ADZp in attP40/CyO::Tb-RFP; VT008473-ZpGdbd in attP2/TM6B
SS57878	Adult	Kaiyu Wang	Dickson	2	N	No	No	10.1038/s41586-020-2972-7	Wang, Wang; 2021	3030965	vpoIN		GMR_12D09-x-VT008473	w; 12D09-p65ADZp in attP40; VT008473-ZpGdbd in attP2
SS60199	Adult	Kaiyu Wang	Dickson	2	N	No	No	10.1038/s41586-020-2972-7	Wang, Wang; 2021	3032512	vpoEN	1570922129, 5813027266	VT017181-x-VT002215	w; 17181-p65ADZp in attP40/CyO; VT002215-ZpGdbd in attP2/TM6B
SS60200	Adult	Kaiyu Wang	Dickson	1	Y	No	Yes	10.1038/s41586-020-2972-7	Wang, Wang; 2021	3032513	vpoEN	1570922129, 5813027266	VT017181-x-VT006537	w; 17181-p65ADZp in attP40/CyO; VT006537-ZpGdbd in attP2/TM6B
SS45323	Adult	Kaiyu Wang	Dickson	2	N	No	No	10.1038/s41586-023-06271-6	Vijayan; 2023	3030083	SEZ_LN, aSP17?		VT019330-x-VT016254	w[1118]; P{y[+t7.7] w[+mC]=VT019330-p65.AD}attP40/CyO; P{y[+t7.7] w[+mC]=VT016254-GAL4.DBD}attP2
SS69505	Adult	Kaiyu Wang	Dickson	2	N	No	No	10.1038/s41586-023-06271-6	Vijayan; 2023	3037631	pMP_PN		VT008474-x-VT005534	w[1118]; P{y[+t7.7] w[+mC]=VT008474-p65.AD}attP40; P{y[+t7.7] w[+mC]=VT005534-GAL4.DBD}attP2
SS66162	Adult	DI	DI	1	N	No	No	10.1038/s41586-024-07222-5	Gorko; 2024	3037175	NMN		GMR_71D08-x-VT026771	w[1118]; P{y[+t7.7] w[+mC]=R71D08-p65.AD}attP40; P{y[+t7.7] w[+mC]=VT026771-GAL4.DBD}attP2
SS66192	Adult	DI	DI	2	N	No	No	10.1038/s41586-024-07222-5	Gorko; 2024	3037187	NMN		GMR_14D05-x-VT019720	w[1118]; P{y[+t7.7] w[+mC]=R14D05-p65.AD}attP40; P{y[+t7.7] w[+mC]=VT019720-GAL4.DBD}attP2/TM6B, Tb[1]
SS66201	Adult	DI	DI	2	N	No	No	10.1038/s41586-024-07222-5	Gorko; 2024	3037188	NMN		GMR_14D05-x-VT019723	w[1118]; P{y[+t7.7] w[+mC]=R14D05-p65.AD}attP40/CyO, P{w[+mC]=2xTb[1]-RFP}CyO; P{y[+t7.7] w[+mC]=VT019723-GAL4.DBD}attP2/TM6B, Tb[1]
SS59453	Adult	Gerry Rubin	Rubin	1	Y	No	No	10.1101/2021.07.23.453511	Mais; 2021	3032430	pC1e	514850616	GMR_60G04-x-GMR_35C10	w[1118]; P{y[+t7.7] w[+mC]=R60G04-p65.AD}attP40; P{y[+t7.7] w[+mC]=R35C10-GAL4.DBD}attP2
SS01010	Adult	Aljoscha Nern	Rubin	2	N	No	No	10.1101/2022.12.14.520178	Zhao; 2022	NA	H2		GMR_32A11-x-GMR_81E05	w; 32A11-p65ADZp in attP40; 81E05-ZpGdbd in attP2
SS25478	Adult	Erica Ehrhardt	DI	1	N	No	No	10.1101/2023.05.31.542897	Ehrhardt, Whitehead; 2023	3028630	HUL012 16A	159206	VT025966-x-VT013121	w[1118]; P{y[+t7.7] w[+mC]=VT025966-p65.AD}attP40; P{y[+t7.7] w[+mC]=VT013121-GAL4.DBD}attP2
SS25482	Adult	Erica Ehrhardt	DI	1	N	No	No	10.1101/2023.05.31.542897	Ehrhardt, Whitehead; 2023	3028847	WBL006 18B	15292	VT044959-x-VT049281	w[1118]; P{y[+t7.7] w[+mC]=VT044959-p65.AD}attP40; P{y[+t7.7] w[+mC]=VT049281-GAL4.DBD}attP2/TM6B, Tb[1]
SS25500	Adult	Erica Ehrhardt	DI	1	N	Yes	No	10.1101/2023.05.31.542897	Ehrhardt, Whitehead; 2023	3028854	HUL011 16A, HUL012 16A	25908, 159206	VT058688-x-VT018834	w[1118]; P{y[+t7.7] w[+mC]=VT058688-p65.AD}attP40; P{y[+t7.7] w[+mC]=VT018834-GAL4.DBD}attP2/TM6B, Tb[1]
SS25502	Adult	Erica Ehrhardt	DI	2	N	No	No	10.1101/2023.05.31.542897	Ehrhardt, Whitehead; 2023	3028459	HUL002 2A, HUL005 2A, HUL006 2A	19838, 28854, 30628	VT026761-x-VT026338	w[1118]; P{y[+t7.7] w[+mC]=VT026761-p65.AD}attP40; P{y[+t7.7] w[+mC]=VT026338-GAL4.DBD}attP2
SS25511	Adult	Erica Ehrhardt	DI	1	N	No	No	10.1101/2023.05.31.542897	Ehrhardt, Whitehead; 2023	3028858	WUL006 11B	30748	VT032906-x-VT026663	w[1118]; P{y[+t7.7] w[+mC]=VT032906-p65.AD}attP40; P{y[+t7.7] w[+mC]=VT026663-GAL4.DBD}attP2
SS25521	Adult	Erica Ehrhardt	DI	2	N	No	No	10.1101/2023.05.31.542897	Ehrhardt, Whitehead; 2023	3028859	WBI001 19B, WBI002 19B	15626, 18477	VT060731-x-VT033912	w[1118]; P{y[+t7.7] w[+mC]=VT060731-p65.AD}attP40; P{y[+t7.7] w[+mC]=VT033912-GAL4.DBD}attP2
SS25532	Adult	Erica Ehrhardt	DI	1	N	Yes	No	10.1101/2023.05.31.542897	Ehrhardt, Whitehead; 2023	3028864	hDVMN, hi1 MN, hi2 MN	14322, 17022, 16222	VT025783-x-VT041692	w[1118]; P{y[+t7.7] w[+mC]=VT025783-p65.AD}attP40/CyO; P{y[+t7.7] w[+mC]=VT041692-GAL4.DBD}attP2
SS25553	Adult	Erica Ehrhardt	DI	2	N	No	No	10.1101/2023.05.31.542897	Ehrhardt, Whitehead; 2023	3028869	NBI008 6B, NBI009 6B, WBI011 6A	153964, 24082, 17089	VT008133-x-VT044655	w[1118]; P{y[+t7.7] w[+mC]=VT008133-p65.AD}attP40; P{y[+t7.7] w[+mC]=VT044655-GAL4.DBD}attP2
SS28361	Adult	Erica Ehrhardt	DI	1	N	No	No	10.1101/2023.05.31.542897	Ehrhardt, Whitehead; 2023	3028889	C2BI004 7B	21129	VT037863-x-GMR_17A10	w[1118]; P{y[+t7.7] w[+mC]=VT037863-p65.AD}attP40; P{y[+t7.7] w[+mC]=R17A10-GAL4.DBD}attP2
SS29535	Adult	Jim Truman	Truman	2	N	No	No	10.1101/2023.05.31.542897	Ehrhardt, Whitehead; 2023	3027682	HBI011 8B, HBI012 08B	24221, 25288	VT044650-x-GMR_83A11	w[1118]; P{y[+t7.7] w[+mC]=VT044650-p65.AD}attP40; P{y[+t7.7] w[+mC]=R83A11-GAL4.DBD}attP2
SS29600	Adult	Erica Ehrhardt	DI	2	N	No	No	10.1101/2023.05.31.542897	Ehrhardt, Whitehead; 2023	3028898	WBI021	21755	VT007746-x-VT024620	w[1118]; P{y[+t7.7] w[+mC]=VT007746-p65.AD}attP40; P{y[+t7.7] w[+mC]=VT024620-GAL4.DBD}attP2
SS29602	Adult	Erica Ehrhardt	DI	1	N	No	No	10.1101/2023.05.31.542897	Ehrhardt, Whitehead; 2023	3028899	HBI018 3B, HBI019 3B, HBI020 3B	10251, 10183, 10668	VT014014-x-VT037825	w[1118]; P{y[+t7.7] w[+mC]=VT014014-p65.AD}attP40/CyO; P{y[+t7.7] w[+mC]=VT037825-GAL4.DBD}attP2
SS29871	Adult	Erica Ehrhardt	DI	1	N	Yes	No	10.1101/2023.05.31.542897	Ehrhardt, Whitehead; 2023	3028461	WUI004, WBI021	15856, 21755	GMR_24F06-x-GMR_22B12	w[1118]; P{y[+t7.7] w[+mC]=R24F06-p65.AD}attP40/CyO, P{w[+mC]=2xTb[1]-RFP}CyO; P{y[+t7.7] w[+mC]=R22B12-GAL4.DBD}attP2
SS30330	Adult	Erica Ehrhardt	DI	2	N	No	No	10.1101/2023.05.31.542897	Ehrhardt, Whitehead; 2023	3028917	NBI003 6A, NBI004 6A	154367, 22994	VT014604-x-GMR_37H01	w[1118]; P{y[+t7.7] w[+mC]=VT014604-p65.AD}attP40; P{y[+t7.7] w[+mC]=R37H01-GAL4.DBD}attP2
SS30816	Adult	Jim Truman	Truman	1	N	Yes	No	10.1101/2023.05.31.542897	Ehrhardt, Whitehead; 2023	3025352	C2BL001 0A, C2BL002 0A, 19B	21011, 20938	VT031084-x-VT040003	w[1118]; P{y[+t7.7] w[+mC]=VT031084-p65.AD}attP40/CyO, P{w[+mC]=2xTb[1]-RFP}CyO; P{y[+t7.7] w[+mC]=VT040003-GAL4.DBD}attP2
SS31246	Adult	Erica Ehrhardt	DI	1	N	No	No	10.1101/2023.05.31.542897	Ehrhardt, Whitehead; 2023	3028562	HBI014 19B	27381	VT038171-x-VT021780	w[1118]; P{y[+t7.7] w[+mC]=VT038171-p65.AD}attP40; P{y[+t7.7] w[+mC]=VT021780-GAL4.DBD}attP2
SS31259	Adult	Erica Ehrhardt	DI	1	N	Yes	No	10.1101/2023.05.31.542897	Ehrhardt, Whitehead; 2023	3026299	WBL030 3B, WBI018 11B, WBI019 11B	16142, 20190, 18653	VT008182-x-VT022091	w[1118]; P{y[+t7.7] w[+mC]=VT008182-p65.AD}attP40; P{y[+t7.7] w[+mC]=VT022091-GAL4.DBD}attP2
SS31263	Adult	Erica Ehrhardt	DI	2	N	Yes	No	10.1101/2023.05.31.542897	Ehrhardt, Whitehead; 2023	3030760	WBL006 18B, WBL007 18B	15292, 13645	VT026387-x-VT030598	w[1118]; P{y[+t7.7] w[+mC]=VT026387-p65.AD}attP40/CyO, P{w[+mC]=2xTb[1]-RFP}CyO; P{y[+t7.7] w[+mC]=VT030598-GAL4.DBD}attP2
SS31274	Adult	Erica Ehrhardt	DI	2	N	No	No	10.1101/2023.05.31.542897	Ehrhardt, Whitehead; 2023	3028933	HUL011 16A, HUL012 16A	25908, 159206	VT025966-x-VT043137	w[1118]; P{y[+t7.7] w[+mC]=VT025966-p65.AD}attP40; P{y[+t7.7] w[+mC]=VT043137-GAL4.DBD}attP2/TM6B, Tb[1]
SS31289	Adult	Erica Ehrhardt	DI	2	N	No	No	10.1101/2023.05.31.542897	Ehrhardt, Whitehead; 2023	3029157	C2BI008 7B, C2BI009 7B	21813, 21493	GMR_34H12-x-VT016461	w[1118]; P{y[+t7.7] w[+mC]=R34H12-p65.AD}attP40/CyO, P{w[+mC]=2xTb[1]-RFP}CyO; P{y[+t7.7] w[+mC]=VT016461-GAL4.DBD}attP2
SS31290	Adult	Erica Ehrhardt	DI	2	N	No	No	10.1101/2023.05.31.542897	Ehrhardt, Whitehead; 2023	3030800	C2BI006 7B, C2BI008 7B, C2BI009 7B, C2BI010 7B	23748, 21813, 21493, 22311	GMR_34H12-x-GMR_77H08	w[1118]; P{y[+t7.7] w[+mC]=R34H12-p65.AD}attP40/CyO, P{w[+mC]=2xTb[1]-RFP}CyO; P{y[+t7.7] w[+mC]=R77H08-GAL4.DBD}attP2/TM6B, Tb[1]
SS31309	Adult	Erica Ehrhardt	DI	2	N	No	No	10.1101/2023.05.31.542897	Ehrhardt, Whitehead; 2023	3028377	WBL006 18B, WBL007 18B, NBI007 6A	15292, 13645, 37267	GMR_72G07-x-VT044959	w[1118]; P{y[+t7.7] w[+mC]=R72G07-p65.AD}attP40; P{y[+t7.7] w[+mC]=VT044959-GAL4.DBD}attP2
SS31541	Adult	Erica Ehrhardt	DI	2	N	No	No	10.1101/2023.05.31.542897	Ehrhardt, Whitehead; 2023	3028390	DLMNs, DVMNs	10589, 10014, 10088, 10592, 10892, 14898, 38723486729, 10733, 15098, 162114, 11776	VT025783-x-VT021842	w[1118]; P{y[+t7.7] w[+mC]=VT025783-p65.AD}attP40; P{y[+t7.7] w[+mC]=VT021842-GAL4.DBD}attP2
SS31899	Adult	Jim Truman	Truman	1	N	No	No	10.1101/2023.05.31.542897	Ehrhardt, Whitehead; 2023	3027687	NBI002 07B	24473	GMR_26H04-x-GMR_46A10	w[1118]; P{y[+t7.7] w[+mC]=R26H04-p65.AD}attP40; P{y[+t7.7] w[+mC]=R46A10-GAL4.DBD}attP2
SS31950	Adult	Erica Ehrhardt	DI	1	N	No	No	10.1101/2023.05.31.542897	Ehrhardt, Whitehead; 2023	3028396	DLMNs, DVMNs	10589, 10014, 10088, 10592, 10892, 14898, 38723486729, 10733, 15098, 162114, 11776	VT014607-x-GMR_11D09	w[1118]; P{y[+t7.7] w[+mC]=VT014607-p65.AD}attP40; P{y[+t7.7] w[+mC]=R11D09-GAL4.DBD}attP2
SS31997	Adult	DI	DI	1	N	Yes	No	10.1101/2023.05.31.542897	Ehrhardt, Whitehead; 2023	3025427	Power muscle motor neuron population		GMR_22A12-x-VT014607	w[1118]; P{y[+t7.7] w[+mC]=R22A12-p65.AD}attP40; P{y[+t7.7] w[+mC]=VT014607-GAL4.DBD}attP2
SS32023	Adult	Erica Ehrhardt	DI	2	N	No	No	10.1101/2023.05.31.542897	Ehrhardt, Whitehead; 2023	3028401	hg1 MN	10011	GMR_91C05-x-GMR_75F02	w[1118]; P{y[+t7.7] w[+mC]=R91C05-p65.AD}attP40/CyO, P{w[+mC]=2xTb[1]-RFP}CyO; P{y[+t7.7] w[+mC]=R75F02-GAL4.DBD}attP2
SS32377	Adult	Erica Ehrhardt	DI	1	N	Yes	No	10.1101/2023.05.31.542897	Ehrhardt, Whitehead; 2023	3028654	HBI015 19B	18282	VT040003-x-VT019902	w[1118]; P{y[+t7.7] w[+mC]=VT040003-p65.AD}attP40; P{y[+t7.7] w[+mC]=VT019902-GAL4.DBD}attP2
SS32400	Adult	Erica Ehrhardt	DI	2	N	No	No	10.1101/2023.05.31.542897	Ehrhardt, Whitehead; 2023	3028961	NBI003 6A, NBI004 6A	154367, 22994	VT014604-x-VT034622	w[1118]; P{y[+t7.7] w[+mC]=VT014604-p65.AD}attP40; P{y[+t7.7] w[+mC]=VT034622-GAL4.DBD}attP2
SS33409	Adult	Erica Ehrhardt	DI	1	N	No	No	10.1101/2023.05.31.542897	Ehrhardt, Whitehead; 2023	3028463	WUL003 11B, WUL004 11B, WUL005 11B, WUL006 11B	163051, 28381, 26369, 30748	VT050238-x-VT043015	w[1118]; P{y[+t7.7] w[+mC]=VT050238-p65.AD}attP40/CyO; P{y[+t7.7] w[+mC]=VT043015-GAL4.DBD}attP2
SS33437	Adult	Erica Ehrhardt	DI	1	N	Yes	No	10.1101/2023.05.31.542897	Ehrhardt, Whitehead; 2023	3026300	WBI001 19B, WBI002 19B	15626, 18477	VT060731-x-VT019730	w[1118]; P{y[+t7.7] w[+mC]=VT060731-p65.AD}attP40; P{y[+t7.7] w[+mC]=VT019730-GAL4.DBD}attP2
SS33489	Adult	Erica Ehrhardt	DI	2	N	Yes	No	10.1101/2023.05.31.542897	Ehrhardt, Whitehead; 2023	3028992	XBI001 5B	25508	GMR_22B12-x-GMR_26C06	w[1118]; P{y[+t7.7] w[+mC]=R22B12-p65.AD}attP40/CyO; P{y[+t7.7] w[+mC]=R26C06-GAL4.DBD}attP2
SS34781	Adult	Erica Ehrhardt	DI	1	N	Yes	No	10.1101/2023.05.31.542897	Ehrhardt, Whitehead; 2023	3025861	i2 MN	10145	GMR_74F04-x-GMR_42H07	w; 74F04-p65ADZp in attP40; 42H07-ZpGdbd in attP2/TM6B
SS34789	Adult	Erica Ehrhardt	DI	2	N	No	No	10.1101/2023.05.31.542897	Ehrhardt, Whitehead; 2023	3025867	leg MN		VT064565-x-GMR_73C03	w[1118]; P{y[+t7.7] w[+mC]=VT064565-p65.AD}attP40; P{y[+t7.7] w[+mC]=R73C03-GAL4.DBD}attP2/TM6B, Tb[1]
SS36076	Adult	Erica Ehrhardt	DI	2	N	No	No	10.1101/2023.05.31.542897	Ehrhardt, Whitehead; 2023	3029044	tp1 MN, hi2 MN	10778, 16222	VT008277-x-VT005002	w[1118]; P{y[+t7.7] w[+mC]=VT008277-p65.AD}attP40; P{y[+t7.7] w[+mC]=VT005002-GAL4.DBD}attP2
SS36094	Adult	Ryo Minegishi	Dickson	2	N	No	No	10.1101/2023.05.31.542897	Ehrhardt, Whitehead; 2023	3030753	LBI10		GMR_48D11-x-VT019771	w[1118]; P{y[+t7.7] w[+mC]=R48D11-p65.AD}attP40; P{y[+t7.7] w[+mC]=VT019771-GAL4.DBD}attP2
SS37231	Adult	Erica Ehrhardt	DI	1	N	Yes	No	10.1101/2023.05.31.542897	Ehrhardt, Whitehead; 2023	3026052	hi1 MN, hi2 MN	17022, 16222	GMR_11C05-x-GMR_58H05	w[1118]; P{y[+t7.7] w[+mC]=R11C05-p65.AD}attP40; P{y[+t7.7] w[+mC]=R58H05-GAL4.DBD}attP2
SS37233	Adult	Erica Ehrhardt	DI	1	N	Yes	No	10.1101/2023.05.31.542897	Ehrhardt, Whitehead; 2023	3026042	WBL034 19B, WBL035 19B, WBL038 19B	14625, 22530, 23462	GMR_12E04-x-VT046011	w[1118]; P{y[+t7.7] w[+mC]=R12E04-p65.AD}attP40; P{y[+t7.7] w[+mC]=VT046011-GAL4.DBD}attP2
SS37246	Adult	Erica Ehrhardt	DI	1	N	No	No	10.1101/2023.05.31.542897	Ehrhardt, Whitehead; 2023	3026050	i2 MN	10145	GMR_23C02-x-GMR_42H07	w[1118]; P{y[+t7.7] w[+mC]=R23C02-p65.AD}attP40; P{y[+t7.7] w[+mC]=R42H07-GAL4.DBD}attP2/TM6B, Tb[1]
SS37252	Adult	Erica Ehrhardt	DI	1	N	Yes	No	10.1101/2023.05.31.542897	Ehrhardt, Whitehead; 2023	3026041	hg2 MN, hg3 MN	12927, 10130	GMR_25C08-x-VT043701	w[1118]; P{y[+t7.7] w[+mC]=R25C08-p65.AD}attP40; P{y[+t7.7] w[+mC]=VT043701-GAL4.DBD}attP2
SS37253	Adult	Erica Ehrhardt	DI	1	N	Yes	No	10.1101/2023.05.31.542897	Ehrhardt, Whitehead; 2023	3026043	hg2 MN, hg3 MN, hDVMN, hi1 MN, T2VUM3	12927, 10931, 14322, 17022, 11919	GMR_25C08-x-VT021379	w; 25C08-p65ADZp in attP40; VT021379-ZpGdbd in attP2
SS37262	Adult	Erica Ehrhardt	DI	2	N	No	No	10.1101/2023.05.31.542897	Ehrhardt, Whitehead; 2023	3026044	leg local interneuron		GMR_33H04-x-VT055068	w[1118]; P{y[+t7.7] w[+mC]=R33H04-p65.AD}attP40; P{y[+t7.7] w[+mC]=VT055068-GAL4.DBD}attP2
SS37296	Adult	Erica Ehrhardt	DI	1	N	No	No	10.1101/2023.05.31.542897	Ehrhardt, Whitehead; 2023	3026049	leg ascending neuron		GMR_42B09-x-GMR_18H03	w[1118]; P{y[+t7.7] w[+mC]=R42B09-p65.AD}attP40; P{y[+t7.7] w[+mC]=R18H03-GAL4.DBD}attP2
SS37306	Adult	Erica Ehrhardt	DI	4	N	Yes	No	10.1101/2023.05.31.542897	Ehrhardt, Whitehead; 2023	3026048	WBL024 3B, WBI016 3B	24632, 160309	GMR_64C05-x-GMR_12E04	w[1118]; P{y[+t7.7] w[+mC]=R12E04-GAL4.DBD}attP2 PBac{y[+mDint2] w[+mC]=R64C05-p65.AD}VK00027
SS37984	Adult	Erica Ehrhardt	DI	2	N	No	No	10.1101/2023.05.31.542897	Ehrhardt, Whitehead; 2023	3030791	WBI001 19B	15626	VT037805-x-GMR_37E07	w[1118]; P{y[+t7.7] w[+mC]=VT037805-p65.AD}attP40; P{y[+t7.7] w[+mC]=R37E07-GAL4.DBD}attP2
SS40449	Adult	Jim Truman	Truman	1	N	No	No	10.1101/2023.05.31.542897	Ehrhardt, Whitehead; 2023	3027301	12A		VT029592-x-VT016254	w[1118]; P{y[+t7.7] w[+mC]=VT029592-p65.AD}attP40; P{y[+t7.7] w[+mC]=VT016254-GAL4.DBD}attP2
SS40456	Adult	Erica Ehrhardt	DI	1	N	Yes	No	10.1101/2023.05.31.542897	Ehrhardt, Whitehead; 2023	3029165	WUI006 6B, WUI008 6B, WUI009 6B	21505, 18559, 21009	GMR_22E12-x-VT063559	w[1118]; P{y[+t7.7] w[+mC]=R22E12-p65.AD}attP40; P{y[+t7.7] w[+mC]=VT063559-GAL4.DBD}attP2
SS40778	Adult	Erica Ehrhardt	DI	4	N	Yes	No	10.1101/2023.05.31.542897	Ehrhardt, Whitehead; 2023	3026597	WBL035 19B, WBL038 19B	22530, 23462	VT060731-x-VT043294	w[1118]; P{y[+t7.7] w[+mC]=VT060731-p65.AD}attP40; P{y[+t7.7] w[+mC]=VT043294-GAL4.DBD}attP2
SS40782	Adult	Erica Ehrhardt	DI	2	N	No	No	10.1101/2023.05.31.542897	Ehrhardt, Whitehead; 2023	3026612	WBL001 18B, WBI002 19B	15505, 18477	VT060731-x-GMR_73C07	w[1118]; P{y[+t7.7] w[+mC]=VT060731-p65.AD}attP40; P{y[+t7.7] w[+mC]=R73C07-GAL4.DBD}attP2
SS40851	Adult	Erica Ehrhardt	DI	4	N	No	No	10.1101/2023.05.31.542897	Ehrhardt, Whitehead; 2023	3026632	hb1 MN, hb2 MN	24257, 49582	VT016988-x-GMR_39E01	w[1118]; P{y[+t7.7] w[+mC]=VT016988-p65.AD}attP40; P{y[+t7.7] w[+mC]=R39E01-GAL4.DBD}attP2/TM6B, Tb[1]
SS40865	Adult	Erica Ehrhardt	DI	3	N	No	No	10.1101/2023.05.31.542897	Ehrhardt, Whitehead; 2023	3026599	leg sensory		GMR_91C05-x-VT042001	w[1118]; P{y[+t7.7] w[+mC]=R91C05-p65.AD}attP40/CyO, P{w[+mC]=2xTb[1]-RFP}CyO; P{y[+t7.7] w[+mC]=VT042001-GAL4.DBD}attP2/TM6B, Tb[1]
SS40867	Adult	Erica Ehrhardt	DI	1	N	Yes	No	10.1101/2023.05.31.542897	Ehrhardt, Whitehead; 2023	3026610	T2VUM1 0B, T2VUM2 0B, T2VUM3 0B, T2VUM4 0B	10597, 11900, 11919, 12395	GMR_TDC2-x-VT027316	w[1118]; P{y[+t7.7] w[+mC]=Tdc2-p65.AD}attP40; P{y[+t7.7] w[+mC]=VT027316-GAL4.DBD}attP2
SS40868	Adult	Erica Ehrhardt	DI	1	N	Yes	No	10.1101/2023.05.31.542897	Ehrhardt, Whitehead; 2023	3026629	T2VUM1 0B, T2VUM3 0B	10597, 11919	GMR_TDC2-x-GMR_25C01	w[1118]; P{y[+t7.7] w[+mC]=Tdc2-p65.AD}attP40; P{y[+t7.7] w[+mC]=R25C01-GAL4.DBD}attP2
SS40980	Adult	Erica Ehrhardt	DI	1	N	No	No	10.1101/2023.05.31.542897	Ehrhardt, Whitehead; 2023	3026638	b1 MN, iii1 MN, iii3 MN	10017, 10129, 10287	VT057058-x-GMR_47F01	w[1118]; P{y[+t7.7] w[+mC]=VT057058-p65.AD}attP40; P{y[+t7.7] w[+mC]=R47F01-GAL4.DBD}attP2
SS41027	Adult	Erica Ehrhardt	DI	1	N	Yes	No	10.1101/2023.05.31.542897	Ehrhardt, Whitehead; 2023	3026367	tt MN, b2 MN, i1 MN, iii4 MN	10110, 10064, 10115, 13365	GMR_33F10-x-GMR_75F02	w[1118]; P{y[+t7.7] w[+mC]=R33F10-p65.AD}attP40; P{y[+t7.7] w[+mC]=R75F02-GAL4.DBD}attP2
SS41034	Adult	Erica Ehrhardt	DI	1	N	No	No	10.1101/2023.05.31.542897	Ehrhardt, Whitehead; 2023	3026352	leg sensory		GMR_38A10-x-GMR_12G01	w[1118]; P{y[+t7.7] w[+mC]=R38A10-p65.AD}attP40; P{y[+t7.7] w[+mC]=R12G01-GAL4.DBD}attP2
SS41039	Adult	Erica Ehrhardt	DI	2	N	No	No	10.1101/2023.05.31.542897	Ehrhardt, Whitehead; 2023	3026613	i1 MN, C2BI003 7B	10115, 18297	GMR_38D03-x-GMR_93E02	w[1118]; P{y[+t7.7] w[+mC]=R38D03-p65.AD}attP40; P{y[+t7.7] w[+mC]=R93E02-GAL4.DBD}attP2
SS41041	Adult	Erica Ehrhardt	DI	2	N	No	No	10.1101/2023.05.31.542897	Ehrhardt, Whitehead; 2023	3026354	HUL001 2A	152403	GMR_41A07-x-GMR_12G01	w[1118]; P{y[+t7.7] w[+mC]=R41A07-p65.AD}attP40; P{y[+t7.7] w[+mC]=R12G01-GAL4.DBD}attP2
SS41052	Adult	Erica Ehrhardt	DI	2	Y	No	No	10.1101/2023.05.31.542897	Ehrhardt, Whitehead; 2023	3026634	tp1 MN	10778	GMR_52E06-x-GMR_39G05	w; 52E06-p65ADZp in attP40; 39G05-ZpGDBD in attP2
SS41068	Adult	Erica Ehrhardt	DI	1	N	Yes	No	10.1101/2023.05.31.542897	Ehrhardt, Whitehead; 2023	3026335	DVMNs	38723486729, 10733, 15098, 162114, 11776	GMR_70B07-x-GMR_74D06	w[1118]; P{y[+t7.7] w[+mC]=R70B07-p65.AD}attP40; P{y[+t7.7] w[+mC]=R74D06-GAL4.DBD}attP2
SS41075	Adult	Yoshi Aso	Aso	1	N	Yes	No	10.1101/2023.05.31.542897	Ehrhardt, Whitehead; 2023	3026344			GMR_93E02-x-GMR_22A12	w[1118]; P{y[+t7.7] w[+mC]=R93E02-p65.AD}attP40/CyO, P{w[+mC]=2xTb[1]-RFP}CyO; P{y[+t7.7] w[+mC]=R22A12-GAL4.DBD}attP2
SS42050	Adult	Erica Ehrhardt	DI	2	N	No	No	10.1101/2023.05.31.542897	Ehrhardt, Whitehead; 2023	3028626	HBI015 19B, HBI016	18282, 25115	VT040003-x-VT048635	w[1118]; P{y[+t7.7] w[+mC]=VT040003-p65.AD}attP40; P{y[+t7.7] w[+mC]=VT048635-GAL4.DBD}attP2
SS42079	Adult	Erica Ehrhardt	DI	1	N	Yes	No	10.1101/2023.05.31.542897	Ehrhardt, Whitehead; 2023	3029374	NBI010 6A, NBI011 6A, NBI012 6A	21092, 18804, 26184	GMR_96A08-x-GMR_79E01	w[1118]; P{y[+t7.7] w[+mC]=R96A08-p65.AD}attP40; P{y[+t7.7] w[+mC]=R79E01-GAL4.DBD}attP2
SS42385	Adult	Erica Ehrhardt	DI	1	N	Yes	No	10.1101/2023.05.31.542897	Ehrhardt, Whitehead; 2023	3026822	T2VUM2 0B, T2VUM3 0B, T2VUM4 0B	11900, 11919, 12395	VT014349-x-GMR_11C01	w[1118]; P{y[+t7.7] w[+mC]=VT014349-p65.AD}attP40; P{y[+t7.7] w[+mC]=R11C01-GAL4.DBD}attP2
SS42438	Adult	Kaiyu Wang	Dickson	1	N	Yes	No	10.1101/2023.05.31.542897	Ehrhardt, Whitehead; 2023	3026835	WUL011 17A, WUL012 17A, WBL014 17A, WBL016 17A, WBL018 17A, WBL020 17A, WBI013 17A	167001, 14309, 12742, 13229, 12520, 10817, 12056	GMR_22H01_XA_21-x-GMR_21B02	w[1118]; P{y[+t7.7] w[+mC]=R22H01-p65.AD}attP40; P{y[+t7.7] w[+mC]=R21B02-GAL4.DBD}attP2
SS42439	Adult	Erica Ehrhardt	DI	1	N	Yes	No	10.1101/2023.05.31.542897	Ehrhardt, Whitehead; 2023	3026823	WUL007 17A, WUL012 17A, WBL015 17A, WBL019 17A	14661, 14309, 11302, 12207	GMR_22H01_XA_21-x-GMR_95F12	w[1118]; P{y[+t7.7] w[+mC]=R22H01-p65.AD}attP40; P{y[+t7.7] w[+mC]=R95F12-GAL4.DBD}attP2
SS42442	Adult	Erica Ehrhardt	DI	2	N	No	No	10.1101/2023.05.31.542897	Ehrhardt, Whitehead; 2023	3029207	WUL008 17A, WUL009 17A, WBL014 17A	16009, 15754, 12742	GMR_23B09-x-GMR_21B02	w[1118]; P{y[+t7.7] w[+mC]=VT003476-p65.AD}attP40; P{y[+t7.7] w[+mC]=R19E06-GAL4.DBD}attP2
SS42446	Adult	Erica Ehrhardt	DI	1	N	Yes	No	10.1101/2023.05.31.542897	Ehrhardt, Whitehead; 2023	3026828	WBI005 6A, WBI006 6A, WBI007 6A, WBI009 6A	158479, 26231, 13756, 154996	GMR_26B04_BB_21-x-GMR_39H12	w[1118]; P{y[+t7.7] w[+mC]=R26B04-p65.AD}attP40; P{y[+t7.7] w[+mC]=R39H12-GAL4.DBD}attP2
SS42447	Adult	Erica Ehrhardt	DI	1	N	Yes	No	10.1101/2023.05.31.542897	Ehrhardt, Whitehead; 2023	3026821	WBL021 6B, WUI006 6B, WUI008 6B, WUI009 6B	22821, 21505, 18559, 21009	GMR_26B04_BB_21-x-GMR_76H04	w[1118]; P{y[+t7.7] w[+mC]=R26B04-p65.AD}attP40; P{y[+t7.7] w[+mC]=R76H04-GAL4.DBD}attP2
SS42464	Adult	Erica Ehrhardt	DI	1	N	Yes	No	10.1101/2023.05.31.542897	Ehrhardt, Whitehead; 2023	3026810	tp2 MN, C2BI006 7B, C2BI007 7B, C2BI009 7B	10766, 23748, 24211, 21493	GMR_41G04_BB_21-x-VT014480	w[1118]; P{y[+t7.7] w[+mC]=R41G04-p65.AD}attP40; P{y[+t7.7] w[+mC]=VT014480-GAL4.DBD}attP2
SS42465	Adult	Erica Ehrhardt	DI	1	N	Yes	No	10.1101/2023.05.31.542897	Ehrhardt, Whitehead; 2023	3026817	WBL001 18B, WBL003 18B, WBL005 18B, WBL010 12A, WBL011 12A	15505, 19834, 13479, 18452, 20452	GMR_41G04_BB_21-x-VT050239	w[1118]; P{y[+t7.7] w[+mC]=R41G04-p65.AD}attP40; P{y[+t7.7] w[+mC]=VT050239-GAL4.DBD}attP2
SS42475	Adult	Erica Ehrhardt	DI	4	N	Yes	No	10.1101/2023.05.31.542897	Ehrhardt, Whitehead; 2023	3026808	XBI002 0A, C2BI005 7B	21089, 23779	GMR_64E06_XA_21-x-VT014480	w[1118]; P{y[+t7.7] w[+mC]=R64E06-p65.AD}attP40; P{y[+t7.7] w[+mC]=VT014480-GAL4.DBD}attP2
SS42493	Adult	Erica Ehrhardt	DI	1	N	No	No	10.1101/2023.05.31.542897	Ehrhardt, Whitehead; 2023	3026816	HBI015 19B	18282	GMR_92A09_XA_21-x-VT031084	w[1118]; P{y[+t7.7] w[+mC]=R92A09-p65.AD}attP40; P{y[+t7.7] w[+mC]=VT031084-GAL4.DBD}attP2
SS42498	Adult	Erica Ehrhardt	DI	2	N	No	No	10.1101/2023.05.31.542897	Ehrhardt, Whitehead; 2023	3026834	WUL007 17A, WUL008 17A, WUL010 17A, WUL012 17A, WBL014 17A	14661, 16009, 16664, 14309, 12742	GMR_95F12_BB_21-x-GMR_21B02	w[1118]; P{y[+t7.7] w[+mC]=R95F12-p65.AD}attP40; P{y[+t7.7] w[+mC]=R21B02-GAL4.DBD}attP2
SS42499	Adult	Erica Ehrhardt	DI	1	N	Yes	No	10.1101/2023.05.31.542897	Ehrhardt, Whitehead; 2023	3026826	C2BI005 7B, WBI012 3B, HBI003	23779, 26518, 24372	GMR_9F12_XA_21-x-GMR_87G07	w; 09F12-p65ADZp in attP40; 87G07-ZpGdbd in attP2
SS43546	Adult	Erica Ehrhardt	DI	2	N	Yes	No	10.1101/2023.05.31.542897	Ehrhardt, Whitehead; 2023	3029170	XBL001 18B	11915	GMR_48A03-x-VT063560	w[1118]; P{y[+t7.7] w[+mC]=R48A03-p65.AD}attP40; P{y[+t7.7] w[+mC]=VT063560-GAL4.DBD}attP2
SS43979	Adult	Erica Ehrhardt	DI	4	N	Yes	No	10.1101/2023.05.31.542897	Ehrhardt, Whitehead; 2023	3027064	HBI003	166363	VT025783-x-GMR_33E06	w[1118]; P{y[+t7.7] w[+mC]=VT025783-p65.AD}attP40; P{y[+t7.7] w[+mC]=R33E06-GAL4.DBD}attP2
SS44002	Adult	Erica Ehrhardt	DI	1	N	Yes	No	10.1101/2023.05.31.542897	Ehrhardt, Whitehead; 2023	3027079	WBL031 3B, WBL032 3B, HBI006 8B	10042, 13557, 25470	VT008182-x-GMR_31E10	w[1118]; P{y[+t7.7] w[+mC]=VT008182-p65.AD}attP40; P{y[+t7.7] w[+mC]=R31E10-GAL4.DBD}attP2
SS44003	Adult	Erica Ehrhardt	DI	1	N	Yes	No	10.1101/2023.05.31.542897	Ehrhardt, Whitehead; 2023	3027060	WBL030 3B, WBL031 3B, WBL032 3B, WBI018 11B, WBI019 11B	16142, 10042, 13557, 20190, 16248	VT008182-x-GMR_38A07	w[1118]; P{y[+t7.7] w[+mC]=VT008182-p65.AD}attP40; P{y[+t7.7] w[+mC]=R38A07-GAL4.DBD}attP2
SS44005	Adult	Jim Truman	Truman	1	N	Yes	No	10.1101/2023.05.31.542897	Ehrhardt, Whitehead; 2023	3027058	WBI018 11B	20190	VT008182-x-GMR_94H03	w[1118]; P{y[+t7.7] w[+mC]=VT008182-p65.AD}attP40; P{y[+t7.7] w[+mC]=R94H03-GAL4.DBD}attP2
SS44009	Adult	Jim Truman	Truman	2	N	No	No	10.1101/2023.05.31.542897	Ehrhardt, Whitehead; 2023	3027296	03B		VT026034-x-VT033050	w[1118]; P{y[+t7.7] w[+mC]=VT026034-p65.AD}attP40; P{y[+t7.7] w[+mC]=VT033050-GAL4.DBD}attP2/TM6B, Tb[1]
SS44028	Adult	Erica Ehrhardt	DI	1	N	Yes	Yes	10.1101/2023.05.31.542897	Ehrhardt, Whitehead; 2023	3027071	leg ascending neuron		VT040354-x-GMR_26B07	w[1118]; P{y[+t7.7] w[+mC]=VT040354-p65.AD}attP40; P{y[+t7.7] w[+mC]=R26B07-GAL4.DBD}attP2
SS44034	Adult	Erica Ehrhardt	DI	1	N	Yes	No	10.1101/2023.05.31.542897	Ehrhardt, Whitehead; 2023	3027054	leg intersegmental neuron		GMR_13E04-x-VT026842	w[1118]; P{y[+t7.7] w[+mC]=R13E04-p65.AD}attP40; P{y[+t7.7] w[+mC]=VT026842-GAL4.DBD}attP2
SS44039	Adult	Erica Ehrhardt	DI	1	N	Yes	No	10.1101/2023.05.31.542897	Ehrhardt, Whitehead; 2023	3027033	DLMNs	10589, 10014, 10088, 10592, 10892	GMR_14E09-x-VT021842	w[1118]; P{y[+t7.7] w[+mC]=VT021842-GAL4.DBD}attP2 P{y[+t7.7] w[+mC]=R14E09-p65.AD}su(Hw)attP1
SS44046	Adult	Erica Ehrhardt	DI	1	N	Yes	No	10.1101/2023.05.31.542897	Ehrhardt, Whitehead; 2023	3027068	leg local interneuron		GMR_18H03-x-GMR_52E12	w[1118]; P{y[+t7.7] w[+mC]=R18H03-p65.AD}attP40; P{y[+t7.7] w[+mC]=R52E12-GAL4.DBD}attP2
SS44051	Adult	Erica Ehrhardt	DI	1	N	Yes	No	10.1101/2023.05.31.542897	Ehrhardt, Whitehead; 2023	3027069	WBI018 11B, WBI019 11B	20190, 18653	GMR_20C03-x-GMR_28H03	w[1118]; P{y[+t7.7] w[+mC]=R20C03-p65.AD}attP40; P{y[+t7.7] w[+mC]=R28H03-GAL4.DBD}attP2
SS44054	Adult	Erica Ehrhardt	DI	4	N	No	No	10.1101/2023.05.31.542897	Ehrhardt, Whitehead; 2023	3027081	HBI020 3B	10668	GMR_23B05-x-VT042757	w[1118]; P{y[+t7.7] w[+mC]=VT042757-GAL4.DBD}attP2 PBac{y[+mDint2] w[+mC]=R23B05-p65.AD}VK00027/TM3, Sb[1]
SS44081	Adult	DI	DI	1	N	Yes	No	10.1101/2023.05.31.542897	Ehrhardt, Whitehead; 2023	3027085	primary sensory, leg sensory		GMR_84H05-x-GMR_13E04	w[1118]; P{y[+t7.7] w[+mC]=R13E04-GAL4.DBD}attP2 PBac{y[+mDint2] w[+mC]=R84H05-p65.AD}VK00027
SS44276	Adult	Erica Ehrhardt	DI	2	N	No	No	10.1101/2023.05.31.542897	Ehrhardt, Whitehead; 2023	3028669	HBI013 6A	152354	VT050112-x-GMR_85H06	w[1118]; P{y[+t7.7] w[+mC]=VT050112-p65.AD}attP40; P{y[+t7.7] w[+mC]=R85H06-GAL4.DBD}attP2
SS44314	Adult	Erica Ehrhardt	DI	2	N	No	No	10.1101/2023.05.31.542897	Ehrhardt, Whitehead; 2023	3029164	NUL001 2A, WUL001 2A, WUL002 2A, HUL002 2A	18136, 23475, 24480, 19838	GMR_50G08-x-VT039458	w[1118]; P{y[+t7.7] w[+mC]=R50G08-p65.AD}attP40; P{y[+t7.7] w[+mC]=VT039458-GAL4.DBD}attP2
SS45385	Adult	Erica Ehrhardt	DI	1	N	No	No	10.1101/2023.05.31.542897	Ehrhardt, Whitehead; 2023	3028623	WBI003 6A, WBI004 6A, WBI007 6A, WBI010 6A, WBI011 6A	16826, 16630, 13756, 39497, 17089	VT004417-x-VT014709	w[1118]; P{y[+t7.7] w[+mC]=VT004417-p65.AD}attP40; P{y[+t7.7] w[+mC]=VT014709-GAL4.DBD}attP2
SS45607	Adult	Erica Ehrhardt	DI	1	N	Yes	No	10.1101/2023.05.31.542897	Ehrhardt, Whitehead; 2023	3030797	WBL001 18B, WBL005 18B, WBL007 18B	15505, 13479, 13645	GMR_23E04-x-GMR_83A12	w[1118]; P{y[+t7.7] w[+mC]=R23E04-p65.AD}JK22C; P{y[+t7.7] w[+mC]=R83A12-GAL4.DBD}attP2
SS45611	Adult	Erica Ehrhardt	DI	1	N	Yes	No	10.1101/2023.05.31.542897	Ehrhardt, Whitehead; 2023	3030446	HBL001 6B	16313	GMR_72E10-x-VT000629	w[1118]; P{y[+t7.7] w[+mC]=R72E10-p65.AD}attP40; P{y[+t7.7] w[+mC]=VT000629-GAL4.DBD}attP2
SS45766	Adult	DI	DI	1	N	Yes	No	10.1101/2023.05.31.542897	Ehrhardt, Whitehead; 2023	3027320	T2VUM1 0B, T2VUM2 0B, T2VUM3 0B	10597, 11900, 11919	VT056770-x-GMR_11C01	w[1118]; P{y[+t7.7] w[+mC]=VT056770-p65.AD}attP40; P{y[+t7.7] w[+mC]=R11C01-GAL4.DBD}attP2
SS45772	Adult	DI	DI	4	N	No	No	10.1101/2023.05.31.542897	Ehrhardt, Whitehead; 2023	3027336	tt MN, b2 MN, i2 MN	10110, 10064, 10145	VT004417-x-GMR_75F02	w[1118]; P{y[+t7.7] w[+mC]=VT004417-p65.AD}attP40; P{y[+t7.7] w[+mC]=R75F02-GAL4.DBD}attP2
SS45779	Adult	DI	DI	1	N	Yes	No	10.1101/2023.05.31.542897	Ehrhardt, Whitehead; 2023	3027337	WMN (mnb2?)b3 MN, iii3 MN, iii4 MN, hg1 MN	10055, 100725, 10123	VT042734-x-GMR_75F02	w[1118]; P{y[+t7.7] w[+mC]=VT042734-p65.AD}attP40; P{y[+t7.7] w[+mC]=R75F02-GAL4.DBD}attP2
SS45782	Adult	DI	DI	2	N	No	No	10.1101/2023.05.31.542897	Ehrhardt, Whitehead; 2023	3027310	i2 MN	10145	VT045575-x-VT007752	w[1118]; P{y[+t7.7] w[+mC]=VT045575-p65.AD}attP40; P{y[+t7.7] w[+mC]=VT007752-GAL4.DBD}attP2
SS45830	Adult	DI	DI	1	N	Yes	No	10.1101/2023.05.31.542897	Ehrhardt, Whitehead; 2023	3027330	T2LFN, WBL002 18B	17245	GMR_78B06-x-GMR_67E03	w[1118]; P{y[+t7.7] w[+mC]=R78B06-p65.AD}attP40; P{y[+t7.7] w[+mC]=R67E03-GAL4.DBD}attP2
SS45843	Adult	DI	DI	1	N	Yes	No	10.1101/2023.05.31.542897	Ehrhardt, Whitehead; 2023	3027464	T2LFNb, WBL002 18B, WBL003 18B, WBL005 18B	17245, 19834, 13479	GMR_95F12-x-GMR_59F02	w[1118]; P{y[+t7.7] w[+mC]=R95F12-p65.AD}attP40; P{y[+t7.7] w[+mC]=R59F02-GAL4.DBD}attP2
SS46260	Adult	Erica Ehrhardt	DI	1	N	Yes	No	10.1101/2023.05.31.542897	Ehrhardt, Whitehead; 2023	3029378	HUI003 17A, HUI004 17A, HUI005 17A	19710, 23127, 18798	GMR_81C11-x-GMR_54H10	w[1118]; P{y[+t7.7] w[+mC]=R81C11-p65.AD}attP40; P{y[+t7.7] w[+mC]=R54H10-GAL4.DBD}attP2
SS46295	Adult	Erica Ehrhardt	DI	1	N	No	No	10.1101/2023.05.31.542897	Ehrhardt, Whitehead; 2023	3028591	WBI014 0A	25798	VT046018-x-GMR_76G11	w[1118]; P{y[+t7.7] w[+mC]=VT046018-p65.AD}attP40; P{y[+t7.7] w[+mC]=R76G11-GAL4.DBD}attP2
SS46645	Adult	Erica Ehrhardt	DI	2	N	No	No	10.1101/2023.05.31.542897	Ehrhardt, Whitehead; 2023	3028504	T2VUM2 0B	11900	VT064569-x-VT056770	w[1118]; P{y[+t7.7] w[+mC]=VT064569-p65.AD}attP40; P{y[+t7.7] w[+mC]=VT056770-GAL4.DBD}attP2
SS46675	Adult	Erica Ehrhardt	DI	1	N	Yes	No	10.1101/2023.05.31.542897	Ehrhardt, Whitehead; 2023	3029169	WBL015 17A, WBL017 17A, WBL018 17A	11302, 11032, 12520	GMR_22H01-x-VT008681	w[1118]; P{y[+t7.7] w[+mC]=R22H01-p65.AD}attP40; P{y[+t7.7] w[+mC]=VT008681-GAL4.DBD}attP2
SS46725	Adult	Erica Ehrhardt	DI	2	N	No	No	10.1101/2023.05.31.542897	Ehrhardt, Whitehead; 2023	3030451	WBL008	27768	VT004417-x-VT028869	w[1118]; P{y[+t7.7] w[+mC]=VT004417-p65.AD}attP40; P{y[+t7.7] w[+mC]=VT028869-GAL4.DBD}attP2
SS47120	Adult	Erica Ehrhardt	DI	2	N	No	No	10.1101/2023.05.31.542897	Ehrhardt, Whitehead; 2023	3027732	tp2 MN	10766	VT021762-x-VT042475	w[1118]; P{y[+t7.7] w[+mC]=VT021762-p65.AD}attP40; P{y[+t7.7] w[+mC]=VT042475-GAL4.DBD}attP2/TM6B, Tb[1]
SS47125	Adult	Erica Ehrhardt	DI	1	N	No	No	10.1101/2023.05.31.542897	Ehrhardt, Whitehead; 2023	3027744	tt MN	10110	VT025786-x-GMR_75F02	w[1118]; P{y[+t7.7] w[+mC]=VT025786-p65.AD}attP40; P{y[+t7.7] w[+mC]=R75F02-GAL4.DBD}attP2
SS47152	Adult	Erica Ehrhardt	DI	2	N	No	No	10.1101/2023.05.31.542897	Ehrhardt, Whitehead; 2023	3027735	ps1 MN	10204	VT008474-x-VT006486	w[1118]; P{y[+t7.7] w[+mC]=VT008474-p65.AD}attP40; P{y[+t7.7] w[+mC]=VT006486-GAL4.DBD}attP2
SS47160	Adult	Erica Ehrhardt	DI	1	N	No	No	10.1101/2023.05.31.542897	Ehrhardt, Whitehead; 2023	3027745	b2 MN, b3 MN, iii4 MN, hg1 MN, hg3 MN	10064, 10067, 13665, 10011, 10931	VT042734-x-GMR_10A12	w[1118]; P{y[+t7.7] w[+mC]=VT042734-p65.AD}attP40; P{y[+t7.7] w[+mC]=R10A12-GAL4.DBD}attP2/TM6B, Tb[1]
SS47192	Adult	Jim Truman	Truman	2	N	No	No	10.1101/2023.05.31.542897	Ehrhardt, Whitehead; 2023	3031754	WUL016 3B, WBL033 3B, 12A	22846, 10507	GMR_44D02-x-GMR_23B05	w[1118]; P{y[+t7.7] w[+mC]=R44D02-p65.AD}attP40; P{y[+t7.7] w[+mC]=R23B05-GAL4.DBD}attP2
SS47195	Adult	Erica Ehrhardt	DI	2	N	No	No	10.1101/2023.05.31.542897	Ehrhardt, Whitehead; 2023	3027736	hi1 MN, hb1 MN, hb2 MN	17022, 24257, 49582	GMR_44F09-x-VT046289	w[1118]; P{y[+t7.7] w[+mC]=R44F09-p65.AD}attP40; P{y[+t7.7] w[+mC]=VT046289-GAL4.DBD}attP2
SS47200	Adult	Erica Ehrhardt	DI	1	N	Yes	No	10.1101/2023.05.31.542897	Ehrhardt, Whitehead; 2023	3027742	WBL012 6B, XBI002 0A	15946, 21089	GMR_50G08-x-GMR_23B05	w[1118]; P{y[+t7.7] w[+mC]=R50G08-p65.AD}attP40; P{y[+t7.7] w[+mC]=R23B05-GAL4.DBD}attP2/TM6B, Tb[1]
SS47204	Adult	Erica Ehrhardt	DI	1	N	Yes	No	10.1101/2023.05.31.542897	Ehrhardt, Whitehead; 2023	3027731	prosternal sensory, HBI007 8B	10611	GMR_67B01-x-VT013654	w[1118]; P{y[+t7.7] w[+mC]=R67B01-p65.AD}attP40; P{y[+t7.7] w[+mC]=VT013654-GAL4.DBD}attP2
SS47214	Adult	Erica Ehrhardt	DI	2	N	No	No	10.1101/2023.05.31.542897	Ehrhardt, Whitehead; 2023	3027746	HBI004 8B, HBI006 8B, HBI007 8B	12947, 25470, 10611	GMR_75D06-x-GMR_67B01	w[1118]; P{y[+t7.7] w[+mC]=R75D06-p65.AD}attP40; P{y[+t7.7] w[+mC]=R67B01-GAL4.DBD}attP2/TM6B, Tb[1]
SS47215	Adult	Erica Ehrhardt	DI	2	N	No	No	10.1101/2023.05.31.542897	Ehrhardt, Whitehead; 2023	3027740	HBI005 8B, HBI006 8B, HBI007 8B, HBI009 8B, HBI019 3B	18055, 25470, 10611, 19386, 10183	GMR_75D06-x-GMR_75F06	w[1118]; P{y[+t7.7] w[+mC]=R75D06-p65.AD}attP40; P{y[+t7.7] w[+mC]=R75F06-GAL4.DBD}attP2
SS47219	Adult	Erica Ehrhardt	DI	1	N	Yes	No	10.1101/2023.05.31.542897	Ehrhardt, Whitehead; 2023	3027733	WBL030 3B, WBI018 11B, WBI019 11B	16142, 20190, 16248	GMR_92B11-x-VT063559	w[1118]; P{y[+t7.7] w[+mC]=VT063559-GAL4.DBD}attP2 PBac{y[+mDint2] w[+mC]=R92B11-p65.AD}VK00027
SS47222	Adult	Erica Ehrhardt	DI	1	N	Yes	No	10.1101/2023.05.31.542897	Ehrhardt, Whitehead; 2023	3027738	WBL030 3B, WBI018 11B, WBI019 11B	16142, 20190, 16248	GMR_92B11-x-GMR_38A07	w[1118]; P{y[+t7.7] w[+mC]=R38A07-GAL4.DBD}attP2 PBac{y[+mDint2] w[+mC]=R92B11-p65.AD}VK00027
SS48204	Adult	Erica Ehrhardt	DI	1	N	No	No	10.1101/2023.05.31.542897	Ehrhardt, Whitehead; 2023	3027811	WBI005 6A, WBI006 6A, WBI007 6A, WBI008 6A, WBI010 6A, WBI011 6A	29817, 28684, 13756, 26231, 39497, 17089	VT048835-x-GMR_85F12	w[1118]; P{y[+t7.7] w[+mC]=VT048835-p65.AD}attP40/CyO, P{w[+mC]=2xTb[1]-RFP}CyO; P{y[+t7.7] w[+mC]=R85F12-GAL4.DBD}attP2/TM6B, Tb[1]
SS48215	Adult	Jim Truman	Truman	1	N	Yes	No	10.1101/2023.05.31.542897	Ehrhardt, Whitehead; 2023	3027805	WUL013 11B, WUL014 11B	17679, 15175	VT006486-x-GMR_23B05	w[1118]; P{y[+t7.7] w[+mC]=VT006486-p65.AD}attP40/CyO, P{w[+mC]=2xTb[1]-RFP}CyO; P{y[+t7.7] w[+mC]=R23B05-GAL4.DBD}attP2
SS48221	Adult	DI	DI	1	N	No	No	10.1101/2023.05.31.542897	Ehrhardt, Whitehead; 2023	3027684	DNx01, ascending neuron, HBI019 3B	10183	VT007170-x-GMR_55H04	w[1118]; P{y[+t7.7] w[+mC]=VT007170-p65.AD}attP40; P{y[+t7.7] w[+mC]=R55H04-GAL4.DBD}attP2
SS48240	Adult	Erica Ehrhardt	DI	1	N	Yes	No	10.1101/2023.05.31.542897	Ehrhardt, Whitehead; 2023	3028393	abdominal MN		VT013670-x-VT001597	w[1118]; P{y[+t7.7] w[+mC]=VT013670-p65.AD}attP40; P{y[+t7.7] w[+mC]=VT001597-GAL4.DBD}attP2
SS48247	Adult	Erica Ehrhardt	DI	1	N	Yes	No	10.1101/2023.05.31.542897	Ehrhardt, Whitehead; 2023	3027777	abdominal MN		VT013670-x-VT014340	w[1118]; P{y[+t7.7] w[+mC]=VT013670-p65.AD}attP40; P{y[+t7.7] w[+mC]=VT014340-GAL4.DBD}attP2/TM6B, Tb[1]
SS48268	Adult	Erica Ehrhardt	DI	1	N	Yes	No	10.1101/2023.05.31.542897	Ehrhardt, Whitehead; 2023	3029287	T2VPM1 2A, WUL015 3B, WUL016 3B, WBL030 3B, WBL032 3B	15493, 20763, 22846, 16142, 13557	GMR_23B05-x-VT041298	w[1118]; P{y[+t7.7] w[+mC]=VT041298-GAL4.DBD}attP2 PBac{y[+mDint2] w[+mC]=R23B05-p65.AD}VK00027
SS48272	Adult	Jim Truman	Truman	2	N	No	No	10.1101/2023.05.31.542897	Ehrhardt, Whitehead; 2023	3027783	WBL009 12A, WBL010 12A, WBL011 12A	26736, 18452, 20452	GMR_26A08-x-VT041298	w[1118]; P{y[+t7.7] w[+mC]=R26A08-p65.AD}attP40; P{y[+t7.7] w[+mC]=VT041298-GAL4.DBD}attP2
SS48287	Adult	DI	DI	1	N	Yes	No	10.1101/2023.05.31.542897	Ehrhardt, Whitehead; 2023	3027767	primary sensory, prosternal sensory		GMR_50G08-x-VT042001	w[1118]; P{y[+t7.7] w[+mC]=R50G08-p65.AD}attP40; P{y[+t7.7] w[+mC]=VT042001-GAL4.DBD}attP2
SS48305	Adult	Erica Ehrhardt	DI	4	N	No	No	10.1101/2023.05.31.542897	Ehrhardt, Whitehead; 2023	3027796	leg bilateral interneuron		GMR_92H07-x-GMR_52B02	w[1118]; P{y[+t7.7] w[+mC]=R92H07-p65.AD}attP40; P{y[+t7.7] w[+mC]=R52B02-GAL4.DBD}attP2
SS48619	Adult	Erica Ehrhardt	DI	1	N	No	No	10.1101/2023.05.31.542897	Ehrhardt, Whitehead; 2023	3029463	NUI002 11B	15125	VT045281-x-VT030541	w[1118]; P{y[+t7.7] w[+mC]=VT045281-p65.AD}attP40/CyO, P{2xTb[1]-RFP}CyO; P{y[+t7.7] w[+mC]=VT030541-GAL4.DBD}attP2
SS48709	Adult	Erica Ehrhardt	DI	1	N	Yes	No	10.1101/2023.05.31.542897	Ehrhardt, Whitehead; 2023	3031865	HUI002 17A, HUI004 17A, HUI005 17A	35906, 23127, 18798	GMR_65D05-x-GMR_44H01	w[1118]; P{y[+t7.7] w[+mC]=R65D05-p65.AD}attP40; P{y[+t7.7] w[+mC]=R44H01-GAL4.DBD}attP2
SS49039	Adult	Erica Ehrhardt	DI	1	Y	No	No	10.1101/2023.05.31.542897	Ehrhardt, Whitehead; 2023	3027965	hg3 MN	10931	VT042734-x-GMR_25C08	w[1118]; P{y[+t7.7] w[+mC]=VT042734-p65.AD}attP40; P{y[+t7.7] w[+mC]=R25C08-GAL4.DBD}attP2
SS49041	Adult	DI	DI	1	N	Yes	No	10.1101/2023.05.31.542897	Ehrhardt, Whitehead; 2023	3027957	WUL004 11B, WUL005 11B, WBL034 19B, WBL037 19B	28381, 26369, 14625, 14502	VT043294-x-VT013947	w[1118]; P{y[+t7.7] w[+mC]=VT043294-p65.AD}attP40; P{y[+t7.7] w[+mC]=VT013947-GAL4.DBD}attP2
SS49042	Adult	Erica Ehrhardt	DI	1	N	Yes	No	10.1101/2023.05.31.542897	Ehrhardt, Whitehead; 2023	3027959	WUL003 11B, WUL005 11B	163051, 26369	VT043294-x-VT043015	w[1118]; P{y[+t7.7] w[+mC]=VT043294-p65.AD}attP40; P{y[+t7.7] w[+mC]=VT043015-GAL4.DBD}attP2
SS49125	Adult	Erica Ehrhardt	DI	1	N	No	No	10.1101/2023.05.31.542897	Ehrhardt, Whitehead; 2023	3031818	HUL010 3B	16244	GMR_48A03-x-VT021731	w[1118]; P{y[+t7.7] w[+mC]=R48A03-p65.AD}attP40; P{y[+t7.7] w[+mC]=VT021731-GAL4.DBD}attP2/TM6B, Tb[1]
SS49766	Adult	Erica Ehrhardt	DI	1	N	Yes	No	10.1101/2023.05.31.542897	Ehrhardt, Whitehead; 2023	3028039	WUL012 17A, WBL013 17A	14309, 16116	VT050238-x-VT018838	w[1118]; P{y[+t7.7] w[+mC]=VT050238-p65.AD}attP40; P{y[+t7.7] w[+mC]=VT018838-GAL4.DBD}attP2
SS49777	Adult	Erica Ehrhardt	DI	1	N	No	No	10.1101/2023.05.31.542897	Ehrhardt, Whitehead; 2023	3028044	PSI 18B, HBI001 18B, HBI002	11654, 16223, 23062	VT012768-x-GMR_75F06	w[1118]; P{y[+t7.7] w[+mC]=VT012768-p65.AD}attP40; P{y[+t7.7] w[+mC]=R75F06-GAL4.DBD}attP2
SS49778	Adult	Erica Ehrhardt	DI	1	N	Yes	No	10.1101/2023.05.31.542897	Ehrhardt, Whitehead; 2023	3028006	WUI001 3B, WUI002 3B	158944, 23027	VT029814-x-VT043294	w[1118]; P{y[+t7.7] w[+mC]=VT029814-p65.AD}attP40; P{y[+t7.7] w[+mC]=VT043294-GAL4.DBD}attP2
SS49779	Adult	Jim Truman	Truman	1	N	Yes	No	10.1101/2023.05.31.542897	Ehrhardt, Whitehead; 2023	3028041	WBL022 3B, WUI005 3B, WBI015 3B, WBI016 03B	25342, 14089, 17024, 160309	VT029814-x-GMR_27A05	w[1118]; P{y[+t7.7] w[+mC]=VT029814-p65.AD}attP40; P{y[+t7.7] w[+mC]=R27A05-GAL4.DBD}attP2
SS49784	Adult	Erica Ehrhardt	DI	1	N	Yes	No	10.1101/2023.05.31.542897	Ehrhardt, Whitehead; 2023	3028037	C2BI001 7B, C2BI002 7B, C2BI003 7B, C2BI009 7B	14155, 16544, 18297, 21493	VT013947-x-VT063216	w[1118]; P{y[+t7.7] w[+mC]=VT013947-p65.AD}attP40; P{y[+t7.7] w[+mC]=VT063216-GAL4.DBD}attP2/TM6B, Tb[+]
SS49797	Adult	Erica Ehrhardt	DI	1	N	Yes	No	10.1101/2023.05.31.542897	Ehrhardt, Whitehead; 2023	3028008	DLMNs, DVMNs	169914, 14898, 38723486729, 10733, 15783	VT004196-x-GMR_74D06	w[1118]; P{y[+t7.7] w[+mC]=VT004196-p65.AD}attP40/CyO, P{w[+mC]=2xTb[1]-RFP}CyO; P{y[+t7.7] w[+mC]=R74D06-GAL4.DBD}attP2
SS49799	Adult	Jim Truman	Truman	1	N	Yes	No	10.1101/2023.05.31.542897	Ehrhardt, Whitehead; 2023	3028045	WBL012 6B, WUI010 06B	15946, 29817	VT008691-x-GMR_37E06	w[1118]; P{y[+t7.7] w[+mC]=VT008691-p65.AD}attP40; P{y[+t7.7] w[+mC]=R37E06-GAL4.DBD}attP2/TM6B, Tb[1]
SS49800	Adult	Erica Ehrhardt	DI	1	N	Yes	No	10.1101/2023.05.31.542897	Ehrhardt, Whitehead; 2023	3028007	WUL005 11B, WUI001 3B, WUI002 3B, WUI011 3B, WUI012 3B	26369, 158944, 23027, 23732, 21110	VT043294-x-VT029814	w[1118]; P{y[+t7.7] w[+mC]=VT043294-p65.AD}attP40; P{y[+t7.7] w[+mC]=VT029814-GAL4.DBD}attP2
SS49802	Adult	Erica Ehrhardt	DI	1	N	Yes	No	10.1101/2023.05.31.542897	Ehrhardt, Whitehead; 2023	3028013	WBI017 11B, WBI019 11B	13743, 16248	VT043294-x-GMR_24F10	w[1118]; P{y[+t7.7] w[+mC]=VT043294-p65.AD}attP40; P{y[+t7.7] w[+mC]=R24F10-GAL4.DBD}attP2
SS49806	Adult	Erica Ehrhardt	DI	2	N	No	No	10.1101/2023.05.31.542897	Ehrhardt, Whitehead; 2023	3028046	b3 MN, hg1 MN, HBI017 3B	10067, 10011, 10244	VT025789-x-GMR_14A02	w[1118]; P{y[+t7.7] w[+mC]=VT025789-p65.AD}attP40/CyO, P{w[+mC]=2xTb[1]-RFP}CyO; P{y[+t7.7] w[+mC]=R14A02-GAL4.DBD}attP2
SS49807	Adult	Erica Ehrhardt	DI	1	N	No	No	10.1101/2023.05.31.542897	Ehrhardt, Whitehead; 2023	3028005	NBI005 6A, WUI002 3B, WUI003 3B	23878, 23027, 163396	VT017249-x-VT043294	w[1118]; P{y[+t7.7] w[+mC]=VT017249-p65.AD}attP40/CyO, P{w[+mC]=2xTb[1]-RFP}CyO; P{y[+t7.7] w[+mC]=VT043294-GAL4.DBD}attP2
SS49809	Adult	Jim Truman	Truman	2	N	No	No	10.1101/2023.05.31.542897	Ehrhardt, Whitehead; 2023	3028038	PSI 18B	11654	GMR_10B11-x-VT012768	w[1118]; P{y[+t7.7] w[+mC]=R10B11-p65.AD}attP40; P{y[+t7.7] w[+mC]=VT012768-GAL4.DBD}attP2
SS49810	Adult	Jim Truman	Truman	1	N	No	No	10.1101/2023.05.31.542897	Ehrhardt, Whitehead; 2023	3028040	PSI 18B	11654	GMR_10B11-x-VT049105	w[1118]; P{y[+t7.7] w[+mC]=R10B11-p65.AD}attP40; P{y[+t7.7] w[+mC]=VT049105-GAL4.DBD}attP2
SS49812	Adult	Erica Ehrhardt	DI	1	N	Yes	No	10.1101/2023.05.31.542897	Ehrhardt, Whitehead; 2023	3028010	PSI 18B	11654	GMR_10B11-x-GMR_13C08	w[1118]; P{y[+t7.7] w[+mC]=R10B11-p65.AD}attP40; P{y[+t7.7] w[+mC]=R13C08-GAL4.DBD}attP2
SS49853	Adult	DI	DI	2	N	No	No	10.1101/2023.05.31.542897	Ehrhardt, Whitehead; 2023	3029839	HBI008 8B, HBI010 8B	13915, 15850	GMR_72B05-x-GMR_59H05	w[1118]; P{y[+t7.7] w[+mC]=R72B05-p65.AD}attP40; P{y[+t7.7] w[+mC]=R59H05-GAL4.DBD}attP2
SS49861	Adult	Erica Ehrhardt	DI	2	N	No	No	10.1101/2023.05.31.542897	Ehrhardt, Whitehead; 2023	3029907	leg local interneuron		GMR_93E02-x-VT026839	w[1118]; P{y[+t7.7] w[+mC]=R93E02-p65.AD}attP40/CyO, P{2xTb[1]-RFP}CyO; P{y[+t7.7] w[+mC]=VT026839-GAL4.DBD}attP2
SS51508	Adult	Erica Ehrhardt	DI	1	N	No	No	10.1101/2023.05.31.542897	Ehrhardt, Whitehead; 2023	3028399	A1VUM1	15253	VT013670-x-GMR_24E06	w[1118]; P{y[+t7.7] w[+mC]=VT013670-p65.AD}attP40; P{y[+t7.7] w[+mC]=R24E06-GAL4.DBD}attP2
SS51524	Adult	Erica Ehrhardt	DI	1	N	Yes	No	10.1101/2023.05.31.542897	Ehrhardt, Whitehead; 2023	3029871	hDVMN	14322	GMR_45G01-x-VT044982	w[1118]; P{y[+t7.7] w[+mC]=R45G01-p65.AD}attP40; P{y[+t7.7] w[+mC]=VT044982-GAL4.DBD}attP2
SS51528	Adult	Erica Ehrhardt	DI	1	Y	No	No	10.1101/2023.05.31.542897	Ehrhardt, Whitehead; 2023	3028394	tpN MN	11294	GMR_73C04-x-GMR_60A06	w[1118] P{y[+t7.7] w[+mC]=R73C04-p65.AD}su(Hw)attP8; P{y[+t7.7] w[+mC]=R60A06-GAL4.DBD}attP2
SS51531	Adult	Erica Ehrhardt	DI	2	N	No	No	10.1101/2023.05.31.542897	Ehrhardt, Whitehead; 2023	3028391	HUI001 17A, HUI003 17A	16223, 24372	GMR_74H07-x-VT021842	w[1118]; P{y[+t7.7] w[+mC]=R74H07-p65.AD}attP40/CyO, P{w[+mC]=2xTb[1]-RFP}CyO; P{y[+t7.7] w[+mC]=VT021842-GAL4.DBD}attP2
SS51830	Adult	Erica Ehrhardt	DI	1	N	Yes	No	10.1101/2023.05.31.542897	Ehrhardt, Whitehead; 2023	3031742	WBL024 3B, WBI016 3B	24632, 160309	VT019307-x-VT029814	w[1118]; P{y[+t7.7] w[+mC]=VT019307-p65.AD}attP40; P{y[+t7.7] w[+mC]=VT029814-GAL4.DBD}attP2
SS52389	Adult	Jim Truman	Truman	2	N	No	No	10.1101/2023.05.31.542897	Ehrhardt, Whitehead; 2023	3029057	WBL025 3B, WBL026 3B, WBL027 3B, WBL028 3B, WBL029 03B	30134, 25039, 26016, 19125, 159799	VT029740-x-GMR_76H04	w[1118]; P{y[+t7.7] w[+mC]=VT029740-p65.AD}attP40; P{y[+t7.7] w[+mC]=R76H04-GAL4.DBD}attP2
SS52392	Adult	Erica Ehrhardt	DI	1	N	No	No	10.1101/2023.05.31.542897	Ehrhardt, Whitehead; 2023	3029830	C2BI001 7B, C2BI003 7B, C2BI006 7B, C2BI007 7B, C2BI010 7B	14155, 18297, 23748, 24211, 22311	VT027323-x-VT045153	w[1118]; P{y[+t7.7] w[+mC]=VT027323-p65.AD}attP40/CyO, P{w[+mC]=2xTb[1]-RFP}CyO; P{y[+t7.7] w[+mC]=VT045153-GAL4.DBD}attP2/TM6B, Tb[1]
SS52395	Adult	Erica Ehrhardt	DI	2	N	No	No	10.1101/2023.05.31.542897	Ehrhardt, Whitehead; 2023	3029829	hg2 MN	12927	VT004417-x-VT045153	w[1118]; P{y[+t7.7] w[+mC]=VT004417-p65.AD}attP40/CyO, P{2xTb[1]-RFP}CyO; P{y[+t7.7] w[+mC]=VT045153-GAL4.DBD}attP2
SS52404	Adult	Erica Ehrhardt	DI	1	N	Yes	No	10.1101/2023.05.31.542897	Ehrhardt, Whitehead; 2023	3029053	hg1 MN	10011	VT042734-x-VT043701	w[1118]; P{y[+t7.7] w[+mC]=VT042734-p65.AD}attP40; P{y[+t7.7] w[+mC]=VT043701-GAL4.DBD}attP2
SS53421	Adult	DI	DI	2	N	No	No	10.1101/2023.05.31.542897	Ehrhardt, Whitehead; 2023	3029847	WN-IN (cross), WUL017 6B, WUI006 6B, WUI007 6B, WUI008 6B, WUI009 6B	22753, 21505, 23610, 18559, 21009	GMR_22E12-x-GMR_58F02	w[1118]; P{y[+t7.7] w[+mC]=R22E12-p65.AD}attP40; P{y[+t7.7] w[+mC]=R58F02-GAL4.DBD}attP2
SS53435	Adult	DI	DI	1	N	Yes	No	10.1101/2023.05.31.542897	Ehrhardt, Whitehead; 2023	3030254	bilateral local interneuron, leg bilateral interneuron		GMR_69H11-x-GMR_85G10	w[1118]; P{y[+t7.7] w[+mC]=R69H11-p65.AD}attP40; P{y[+t7.7] w[+mC]=R85G10-GAL4.DBD}attP2
SS53438	Adult	Erica Ehrhardt	DI	1	N	No	No	10.1101/2023.05.31.542897	Ehrhardt, Whitehead; 2023	3029835	i2 MN	10145	GMR_75C10-x-VT031567	w[1118]; P{y[+t7.7] w[+mC]=R75C10-p65.AD}attP40; P{y[+t7.7] w[+mC]=VT031567-GAL4.DBD}attP2
SS54445	Adult	Erica Ehrhardt	DI	2	N	No	No	10.1101/2023.05.31.542897	Ehrhardt, Whitehead; 2023	3029939	WBL012 6B, WUI004	15946, 15856	VT061927-x-GMR_37E06	w[1118]; P{y[+t7.7] w[+mC]=VT061927-p65.AD}attP40; P{y[+t7.7] w[+mC]=R37E06-GAL4.DBD}attP2
SS54480	Adult	Jim Truman	Truman	1	N	Yes	No	10.1101/2023.05.31.542897	Ehrhardt, Whitehead; 2023	3029932	NUI001 6B, NBI003 6A, NBI004 6A, NBI007 06A	22272, 154367, 22994, 37267	VT014604-x-GMR_93B07	w[1118]; P{y[+t7.7] w[+mC]=VT014604-p65.AD}attP40; P{y[+t7.7] w[+mC]=R93B07-GAL4.DBD}attP2
SS54495	Adult	Erica Ehrhardt	DI	1	N	No	No	10.1101/2023.05.31.542897	Ehrhardt, Whitehead; 2023	3029912	NUI001 6B, NBI006 6A, NBI007 6A, NBI008 6B, NBI009 6B	22272, 24899, 37267, 153964, 24082	GMR_46C02-x-VT008133	w[1118]; P{y[+t7.7] w[+mC]=VT008133-GAL4.DBD}attP2 PBac{y[+mDint2] w[+mC]=R46C02-p65.AD}VK00027
SS54506	Adult	Erica Ehrhardt	DI	2	N	Yes	No	10.1101/2023.05.31.542897	Ehrhardt, Whitehead; 2023	3029937	HUL001 2A, HUL002 2A, HUL003 2A, HUL004 2A, HUL005 2A, HUL007 2A, HUL008 2A, HUL009 2A	152403, 19838, 33104, 32073, 28854, 34691, 35192, 19990	GMR_50G08-x-GMR_59D07	w[1118]; P{y[+t7.7] w[+mC]=R50G08-p65.AD}attP40; P{y[+t7.7] w[+mC]=R59D07-GAL4.DBD}attP2
SS60603	Adult	Erica Ehrhardt	DI	1	N	No	No	10.1101/2023.05.31.542897	Ehrhardt, Whitehead; 2023	3034237	NBI001 7B, XBI001 5B, C2BI005 7B	19649, 25508, 23779	VT026771-x-VT019749	w[1118]; P{y[+t7.7] w[+mC]=VT026771-p65.AD}attP40; P{y[+t7.7] w[+mC]=VT019749-GAL4.DBD}attP2/TM6B, Tb[1]
SS55961	Adult	DI	DI	1	N	No	No	10.1101/2023.06.07.543976	Cheong, Eichler, Stuerner; 2023	3030577	DNp33		VT025934-x-GMR_64G02	w[1118]; P{y[+t7.7] w[+mC]=VT025934-p65.AD}attP40; P{y[+t7.7] w[+mC]=R64G02-GAL4.DBD}attP2
SS56145	Adult	DI	DI	1	N	No	No	10.1101/2023.06.07.543976	Cheong, Eichler, Stuerner; 2023	3030992	DNg80		VT049978-x-VT050669	w[1118]; P{y[+t7.7] w[+mC]=VT049978-p65.AD}attP40; P{y[+t7.7] w[+mC]=VT050669-GAL4.DBD}attP2
SS57807	Adult	DI	DI	1	N	No	No	10.1101/2023.06.07.543976	Cheong, Eichler, Stuerner; 2023	3031981	DNp42		GMR_32A04-x-VT033636	w[1118]; P{y[+t7.7] w[+mC]=R32A04-p65.AD}attP40; P{y[+t7.7] w[+mC]=VT033636-GAL4.DBD}attP2
SS63295	Adult	DI	DI	1	N	No	No	10.1101/2023.06.07.543976	Cheong, Eichler, Stuerner; 2023	3036267	New DNg (GNG-T2L)		VT043662-x-VT047418	w[1118]; P{y[+t7.7] w[+mC]=VT043662-p65.AD}attP40; P{y[+t7.7] w[+mC]=VT047418-GAL4.DBD}attP2/TM6B, Tb[1]
SS63715	Adult	DI	DI	1	N	No	No	10.1101/2023.06.07.543976	Cheong, Eichler, Stuerner; 2023	3036271	DNa01x2		GMR_14F03-x-VT002081	w[1118]; P{y[+t7.7] w[+mC]=R14F03-p65.AD}attP40; P{y[+t7.7] w[+mC]=VT002081-GAL4.DBD}attP2/TM6B, Tb[1]
SS64688	Adult	DI	DI	2	N	No	No	10.1101/2023.06.07.543976	Cheong, Eichler, Stuerner; 2023	3036263	DNp44		GMR_23C02-x-VT024643	w[1118]; P{y[+t7.7] w[+mC]=R23C02-p65.AD}attP40; P{y[+t7.7] w[+mC]=VT024643-GAL4.DBD}attP2
SS67109	Adult	DI	DI	1	N	No	No	10.1101/2023.06.07.543976	Cheong, Eichler, Stuerner; 2023	3036644	DNg52		VT050112-x-VT046828	w[1118]; P{y[+t7.7] w[+mC]=VT050112-p65.AD}attP40/CyO, P{w[+mC]=2xTb[1]-RFP}CyO; P{y[+t7.7] w[+mC]=VT046828-GAL4.DBD}attP2
SS67148	Adult	DI	DI	1	N	No	No	10.1101/2023.06.07.543976	Cheong, Eichler, Stuerner; 2023	3036659	DNg50		GMR_85F12-x-VT034404	w[1118]; P{y[+t7.7] w[+mC]=R85F12-p65.AD}attP40; P{y[+t7.7] w[+mC]=VT034404-GAL4.DBD}attP2
SS83628	Adult	DI	DI	1	N	No	No	10.1101/2023.06.07.543976	Cheong, Eichler, Stuerner; 2023	3041180	DNp08		VT010664-x-GMR_91A11	w[1118]; P{y[+t7.7] w[+mC]=VT010664-p65.AD}attP40/CyO, P{w[+mC]=2xTb[1]-RFP}CyO; P{y[+t7.7] w[+mC]=R91A11-GAL4.DBD}attP2
SS85917	Adult	DI	DI	1	N	No	No	10.1101/2023.06.07.543976	Cheong, Eichler, Stuerner; 2023	3041511	DNg69		GMR_29B04-x-VT025957	w[1118]; P{y[+t7.7] w[+mC]=R29B04-p65.AD}attP40; P{y[+t7.7] w[+mC]=VT025957-GAL4.DBD}attP2
SS93763	Adult	DI	DI	2	N	No	No	10.1101/2023.06.07.543976	Cheong, Eichler, Stuerner; 2023	3042804	DNg93		GMR_11B03-x-VT008534	w[1118]; P{y[+t7.7] w[+mC]=R11B03-p65.AD}attP40/CyO, P{w[+mC]=2xTb[1]-RFP}CyO; P{y[+t7.7] w[+mC]=VT008534-GAL4.DBD}attP2
SS02406	Adult	Aljoscha Nern	Rubin	2	N	No	No	10.1101/2023.06.21.546024	Isaacson; 2023	3018357	LLPC1		VT048351-x-VT044492	w[1118]; P{y[+t7.7] w[+mC]=VT048351-p65.AD}attP40; P{y[+t7.7] w[+mC]=VT044492-GAL4.DBD}attP2/TM6B, Tb[1]
SS02407	Adult	Aljoscha Nern	Rubin	1	N	No	No	10.1101/2023.06.21.546024	Isaacson; 2023	3018358	LLPC1		VT057342-x-VT044492	w[1118]; P{y[+t7.7] w[+mC]=VT057342-p65.AD}attP40/CyO, P{w[+mC]=2xTb[1]-RFP}CyO; P{y[+t7.7] w[+mC]=VT044492-GAL4.DBD}attP2/TM6B, Tb[1]
SS02422	Adult	Aljoscha Nern	Rubin	2	N	No	No	10.1101/2023.06.21.546024	Isaacson; 2023	3018373	LLPC2, LLPC3		VT046081-x-VT029598	w[1118]; P{y[+t7.7] w[+mC]=VT046081-p65.AD}attP40; P{y[+t7.7] w[+mC]=VT029598-GAL4.DBD}attP2
SS02436	Adult	Aljoscha Nern	Rubin	2	N	No	No	10.1101/2023.06.21.546024	Isaacson; 2023	3018387	LLPC2, LLPC3		VT029598-x-VT046081	w[1118]; P{y[+t7.7] w[+mC]=VT029598-p65.AD}attP40; P{y[+t7.7] w[+mC]=VT046081-GAL4.DBD}attP2
SS25868	Adult	Aljoscha Nern	Rubin	2	N	No	No	10.1101/2023.06.21.546024	Isaacson; 2023	3024361	LPC2		VT032900-x-VT016114	w[1118]; P{y[+t7.7] w[+mC]=VT032900-p65.AD}attP40; P{y[+t7.7] w[+mC]=VT016114-GAL4.DBD}attP2
SS34215	Adult	Aljoscha Nern	Rubin	1	N	No	No	10.1101/2023.06.21.546024	Isaacson; 2023	3025522	PLP249		VT002033-x-GMR_78A06	w[1118]; P{y[+t7.7] w[+mC]=VT002033-p65.AD}attP40/CyO, P{2xTb[1]-RFP}CyO; P{y[+t7.7] w[+mC]=R78A06-GAL4.DBD}attP2
MB048B	Adult	Yoshi Aso	Aso	2	N	No	No	10.7554/eLife.94168	Shuai; 2024	2135098	VP3, _vPN	663432544	GMR_59F08_BB_21-x-GMR_14E09_AV_01	w[1118]; P{y[+t7.7] w[+mC]=R59F08-p65.AD}attP40/CyO; P{y[+t7.7] w[+mC]=R14E09-GAL4.DBD}attP2
MB116B	Adult	Yoshi Aso	Aso	1	N	Not determined	Not determined	10.7554/eLife.94168	Shuai; 2024	2135164			GMR_10E06_BB_21-x-GMR_35B12_AV_01	w[1118]; P{y[+t7.7] w[+mC]=R10E06-p65.AD}attP40/CyO, P{w[+mC]=2xTb[1]-RFP}CyO; P{y[+t7.7] w[+mC]=R35B12-GAL4.DBD}attP2/TM6B, Tb[1]
MB155B	Adult	Yoshi Aso	Aso	2	N	No	No	10.7554/eLife.94168	Shuai; 2024	2135203	LHAV4e7_b	606444098, 731919293, 1042572999	GMR_24E06_BB_21-x-GMR_30H02_AV_01	w[1118]; P{y[+t7.7] w[+mC]=R24E06-p65.AD}attP40; P{y[+t7.7] w[+mC]=R30H02-GAL4.DBD}attP2/TM6B, Tb[1]
MB203B	Adult	Yoshi Aso	Aso	1	N	No	No	10.7554/eLife.94168	Shuai; 2024	2135251	MBON15-like, MBON16, MBON17, MBON17-like	457175171, 579916831 673366098 5812981264 5812981543	GMR_71D08_BB_21-x-GMR_24H08_AV_01	w[1118]; P{y[+t7.7] w[+mC]=R71D08-p65.AD}attP40/CyO; P{y[+t7.7] w[+mC]=R24H08-GAL4.DBD}attP2
MB206B	Adult	Yoshi Aso	Aso	1	N	No	No	10.7554/eLife.94168	Shuai; 2024	2135254	MBON16, MBON17, MBON17-like	673366098, 5812981264, 5812981543	GMR_71D08_BB_21-x-GMR_53F03_AV_01	w[1118]; P{y[+t7.7] w[+mC]=R71D08-p65.AD}attP40/CyO; P{y[+t7.7] w[+mC]=R53F03-GAL4.DBD}attP2
MB246A	Adult	Yoshi Aso	Aso	2	Y	No	No	10.7554/eLife.94168	Shuai; 2024	2135294			GMR_TDC2_BB_11-x-GMR_30H02_AV_01	w[1118] P{y[+t7.7] w[+mC]=Tdc2-p65.AD}su(Hw)attP8; P{y[+t7.7] w[+mC]=R30H02-GAL4.DBD}attP2/TM6B, Tb[1]
MB252C	Adult	Yoshi Aso	Aso	2	N	No	No	10.7554/eLife.94168	Shuai; 2024	2135300			GMR_20C11_BB_04-x-GMR_21G01_AV_01	w[1118]; P{y[+t7.7] w[+mC]=R21G01-GAL4.DBD}attP2 PBac{y[+mDint2] w[+mC]=R20C11-p65.AD}VK00027
MB302B	Adult	Yoshi Aso	Aso	3	N	No	No	10.7554/eLife.94168	Shuai; 2024	2135350	PPL103	1048172314, 5813022424	GMR_73F07_BB_21-x-GMR_30E11_AV_01	w[1118]; P{y[+t7.7] w[+mC]=R73F07-p65.AD}attP40; P{y[+t7.7] w[+mC]=R30E11-GAL4.DBD}attP2
MB408B	Adult	Yoshi Aso	Aso	2	N	No	No	10.7554/eLife.94168	Shuai; 2024	2501749	HRN_VP1l, TRN_VP1m, ORN_VL1	1977898840, 1977898894, 2039623367, 2101685376, 2133060479, 5813000247 1979263232, 2009274786, 2009274855, 2009611617, 2009611976, 2009612004 2138849727, 2169198172, 2169198190, 2169538985, 2197158842, 2197158864, …	GMR_24H02_BB_21-x-GMR_43C10_AV_01	w[1118]; P{y[+t7.7] w[+mC]=R24H02-p65.AD}attP40/CyO; P{y[+t7.7] w[+mC]=R43C10-GAL4.DBD}attP2
MB485B	Adult	Yoshi Aso	Aso	2	N	No	No	10.7554/eLife.94168	Shuai; 2024	2501827	DL3_lPN, VM4_lvPN	1609542060, 1609883245, 1640568102 726207450, 1850024931	GMR_48H12_BB_21-x-GMR_37E06_AV_01	w[1118]; P{y[+t7.7] w[+mC]=R48H12-p65.AD}attP40/CyO; P{y[+t7.7] w[+mC]=R37E06-GAL4.DBD}attP2
MB563B	Adult	Yoshi Aso	Aso	2	N	No	No	10.7554/eLife.94168	Shuai; 2024	2501913	ORN_VL1, ORN_VL2p	2138849727, 2169198172, 2169198190, 2169538985, 2197158842, 2197158864, … 1697285129, 1948172360, 1948512982, 1948513200, 1979206640, 1979547954, …	GMR_81D09_BB_21-x-GMR_38E07_AV_01	w[1118]; P{y[+t7.7] w[+mC]=R81D09-p65.AD}attP40; P{y[+t7.7] w[+mC]=R38E07-GAL4.DBD}attP2/TM6B, Tb[1]
MB618B	Adult	Yoshi Aso	Aso	1	N	No	No	10.7554/eLife.94168	Shuai; 2024	2502491	MBON15-like, MBON17, MBON17-like	457175171, 579916831 5812981264 5812981543	GMR_65B09_BB_21-x-GMR_53B06_AV_01	w[1118]; P{y[+t7.7] w[+mC]=R65B09-p65.AD}attP40; P{y[+t7.7] w[+mC]=R53B06-GAL4.DBD}attP2/TM6B, Tb[1]
MB623C	Adult	Yoshi Aso	Aso	2	N	No	No	10.7554/eLife.94168	Shuai; 2024	3033397			GMR_13F02_BB_04-x-BJD_128G09_AV_01	w[1118]; P{y[+t7.7] w[+mC]=VT058937-GAL4.DBD}attP2, PBac{y[+mDint2] w[+mC]=R13F02-p65.AD}VK00027
SS00445	Adult	Yoshi Aso	Aso	1	N	No	No	10.7554/eLife.94168	Shuai; 2024	2501956	ORN_VA7l	2042027880, 2044786251, 2106467925, 2106472221, 2106817517, 2137161409, …	GMR_10G02-x-GMR_24A01	w[1118]; P{y[+t7.7] w[+mC]=R10G02-p65.AD}attP40; P{y[+t7.7] w[+mC]=R24A01-GAL4.DBD}attP2
SS00447	Adult	Yoshi Aso	Aso	1	N	No	Yes	10.7554/eLife.94168	Shuai; 2024	2501958	l-LNv	1884625521, 2065745704, 5813001741, 5813026773	GMR_10H10-x-GMR_25A08	w[1118]; P{y[+t7.7] w[+mC]=R10H10-p65.AD}attP40/CyO; P{y[+t7.7] w[+mC]=R25A08-GAL4.DBD}attP2
SS00455	Adult	Yoshi Aso	Aso	1	N	No	Yes	10.7554/eLife.94168	Shuai; 2024	2501966	SAD058, SAD066	1813900946, 1813901048, 1813901059 1844914014, 2127949176	GMR_12E07_XA_21-x-GMR_74F07_XD_01	w[1118]; P{y[+t7.7] w[+mC]=R12E07-p65.AD}attP40/CyO; P{y[+t7.7] w[+mC]=R74F07-GAL4.DBD}attP2
SS00459	Adult	Yoshi Aso	Aso	2	N	No	No	10.7554/eLife.94168	Shuai; 2024	2501970	v2LN40	1728294045, 1728294318, 1852754119, 1887837668, 1888860914, 1947188040, 1947192569	GMR_14B07-x-GMR_94D12	w[1118]; P{y[+t7.7] w[+mC]=R14B07-p65.AD}attP40; P{y[+t7.7] w[+mC]=R94D12-GAL4.DBD}attP2/TM6B, Tb[1]
SS00470	Adult	Yoshi Aso	Aso	1	N	No	No	10.7554/eLife.94168	Shuai; 2024	2501981	DNES2, DNES3	295063181, 5813067334 418645869	GMR_16E11-x-GMR_18G01	w[1118]; P{y[+t7.7] w[+mC]=R16E11-p65.AD}attP40; P{y[+t7.7] w[+mC]=R18G01-GAL4.DBD}attP2/TM6B, Tb[1]
SS00486	Adult	Yoshi Aso	Aso	1	N	No	No	10.7554/eLife.94168	Shuai; 2024	2501997	M_smPNm1	763730414	GMR_24C04-x-GMR_47A11	w[1118]; P{y[+t7.7] w[+mC]=R24C04-p65.AD}attP40; P{y[+t7.7] w[+mC]=R47A11-GAL4.DBD}attP2
SS00502	Adult	Yoshi Aso	Aso	2	N	No	No	10.7554/eLife.94168	Shuai; 2024	2502014	LHPV5a2	573670049, 579576294, 696432315, 727838223	GMR_25B07-x-GMR_45F12	w[1118]; P{y[+t7.7] w[+mC]=R25B07-p65.AD}attP40/CyO; P{y[+t7.7] w[+mC]=R45F12-GAL4.DBD}attP2
SS00503	Adult	Yoshi Aso	Aso	2	N	No	No	10.7554/eLife.94168	Shuai; 2024	2502015	HRN_VP1l	1977898840, 1977898894, 2039623367, 2101685376, 2133060479, 5813000247	GMR_25B07-x-GMR_51D04	w[1118]; P{y[+t7.7] w[+mC]=R25B07-p65.AD}attP40; P{y[+t7.7] w[+mC]=R51D04-GAL4.DBD}attP2
SS00525	Adult	Yoshi Aso	Aso	2	N	No	No	10.7554/eLife.94168	Shuai; 2024	2502038	ORN_V	2200228723, 2200228767, 2200228798, 2200569724, 2230926964, 2230931053, …	GMR_30H02-x-GMR_33E02	w[1118]; P{y[+t7.7] w[+mC]=R33E02-GAL4.DBD}attP2 PBac{y[+mDint2] w[+mC]=R30H02-p65.AD}VK00027
SS00532	Adult	Yoshi Aso	Aso	1	N	No	No	10.7554/eLife.94168	Shuai; 2024	2502045	DNES1	513447083, 574834955, 603477954, 603478303, 5812980506	GMR_31F03-x-GMR_56B05	w[1118]; P{y[+t7.7] w[+mC]=R56B05-GAL4.DBD}attP2 PBac{y[+mDint2] w[+mC]=R31F03-p65.AD}VK00027
SS00550	Adult	Yoshi Aso	Aso	1	Y	No	Yes	10.7554/eLife.94168	Shuai; 2024	2502066			GMR_37A12-x-GMR_27H08	w[1118]; P{y[+t7.7] w[+mC]=R37A12-p65.AD}attP40; P{y[+t7.7] w[+mC]=R27H08-GAL4.DBD}attP2
SS00560	Adult	Yoshi Aso	Aso	1	N	No	Yes	10.7554/eLife.94168	Shuai; 2024	2502076	HRN_VP1l, HRN_VP4, ORN_VL2p	1977898840, 1977898894, 2039623367, 2101685376, 2133060479, 5813000247 1758664692, 1790027507, 1790027663, 1790027860, 1821053937, 1821054097, … 1697285129, 1948172360, 1948512982, 1948513200, 1979206640, 1979547954, …	GMR_38E07_XA_21-x-GMR_51D04_XD_01	w[1118]; P{y[+t7.7] w[+mC]=R38E07-p65.AD}attP40; P{y[+t7.7] w[+mC]=R51D04-GAL4.DBD}attP2/TM6B, Tb[1]
SS00589	Adult	Yoshi Aso	Aso	2	N	No	No	10.7554/eLife.94168	Shuai; 2024	2502106	aSP28_TBD	572801466, 982446156, 5813013228	GMR_50H07-x-GMR_80B04	w[1118]; P{y[+t7.7] w[+mC]=R50H07-p65.AD}attP40; P{y[+t7.7] w[+mC]=R80B04-GAL4.DBD}attP2
SS00603	Adult	Yoshi Aso	Aso	1	N	No	No	10.7554/eLife.94168	Shuai; 2024	2502120			GMR_55F02_XA_21-x-GMR_34A03_XD_01	w[1118]; P{y[+t7.7] w[+mC]=R55F02-p65.AD}attP40/CyO; P{y[+t7.7] w[+mC]=R34A03-GAL4.DBD}attP2
SS00612	Adult	Yoshi Aso	Aso	2	N	No	No	10.7554/eLife.94168	Shuai; 2024	2502129			GMR_60A10-x-GMR_95H02	w; 60A10-p65ADZp in attP40; 95H02-ZpGdbd in attP2/TM2
SS01090	Adult	Yoshi Aso	Aso	2	N	No	No	10.7554/eLife.94168	Shuai; 2024	3016125			VT001606-x-VT030609	w[1118]; P{y[+t7.7] w[+mC]=VT001606-p65.AD}attP40; P{y[+t7.7] w[+mC]=VT030609-GAL4.DBD}attP2
SS01100	Adult	Yoshi Aso	Aso	2	N	No	No	10.7554/eLife.94168	Shuai; 2024	3016135	VP1m, VP5_ilPN, VP1d_il2PN	1944502935, 2069648663 1639234609, 1639243580	VT058568-x-VT026020	w[1118]; P{y[+t7.7] w[+mC]=VT058568-p65.AD}attP40; P{y[+t7.7] w[+mC]=VT026020-GAL4.DBD}attP2
SS01108	Adult	Yoshi Aso	Aso	2	N	No	No	10.7554/eLife.94168	Shuai; 2024	3016143	VA1d_vPN, M_vPNml85, M_vPNml88, M_vPNml89	1888524453 603349484, 635407942 634379734 481268653, 1694850602, 1819326555	VT039458-x-VT015830	w[1118]; P{y[+t7.7] w[+mC]=VT039458-p65.AD}attP40; P{y[+t7.7] w[+mC]=VT015830-GAL4.DBD}attP2
SS01111	Adult	Yoshi Aso	Aso	3	N	No	No	10.7554/eLife.94168	Shuai; 2024	3016146			VT048942-x-VT014097	w[1118]; P{y[+t7.7] w[+mC]=VT048942-p65.AD}attP40; P{y[+t7.7] w[+mC]=VT014097-GAL4.DBD}attP2
SS01127	Adult	Yoshi Aso	Aso	1	N	No	No	10.7554/eLife.94168	Shuai; 2024	3016162	MBON03	487925037, 612738462	GMR_14C08-x-VT065306	w[1118]; P{y[+t7.7] w[+mC]=R14C08-p65.AD}attP40; P{y[+t7.7] w[+mC]=VT065306-GAL4.DBD}attP2
SS01132	Adult	Yoshi Aso	Aso	1	N	No	Yes	10.7554/eLife.94168	Shuai; 2024	3016167	VM7d_adPN, VM7v_adPN	913650065, 913650068, 1851393805, 5813050727, 5813057542, 693479072, 820545761, 913650164, 1889253763	GMR_19G08_BB_03-x-BJD_115F09_AV_01	w[1118]; P{y[+t7.7] w[+mC]=VT033006-GAL4.DBD}attP2 P{y[+t7.7] w[+mC]=R19G08-p65.AD}su(Hw)attP1
SS01147	Adult	Yoshi Aso	Aso	1	N	No	Yes	10.7554/eLife.94168	Shuai; 2024	3016182	DL3_lPN	1609542060, 1609883245, 1640568102	GMR_26B04-x-VT033006	w[1118]; P{y[+t7.7] w[+mC]=R26B04-p65.AD}attP40/CyO, P{w[+mC]=2xTb[1]-RFP}CyO; P{y[+t7.7] w[+mC]=VT033006-GAL4.DBD}attP2/TM6B, Tb[1]
SS01154	Adult	Yoshi Aso	Aso	2	N	No	No	10.7554/eLife.94168	Shuai; 2024	3016189			GMR_33E02_XA_21-x-BJD_112E04_AV_01	w[1118]; P{y[+t7.7] w[+mC]=R33E02-p65.AD}attP40; P{y[+t7.7] w[+mC]=VT007770-GAL4.DBD}attP2
SS01160	Adult	Yoshi Aso	Aso	2	N	No	No	10.7554/eLife.94168	Shuai; 2024	3016195			GMR_41C05_BB_21-x-BJD_114G04_AV_01	w[1118]; P{y[+t7.7] w[+mC]=R41C05-p65.AD}attP40; P{y[+t7.7] w[+mC]=VT058568-GAL4.DBD}attP2
SS01168	Adult	Yoshi Aso	Aso	2	N	No	No	10.7554/eLife.94168	Shuai; 2024	3016203	M_vPNml84	605050789, 729544359, 760250272, 791298858	GMR_49F09-x-VT013594	w[1118]; P{y[+t7.7] w[+mC]=R49F09-p65.AD}attP40; P{y[+t7.7] w[+mC]=VT013594-GAL4.DBD}attP2
SS01171	Adult	Yoshi Aso	Aso	1	N	No	No	10.7554/eLife.94168	Shuai; 2024	3016206	VL2a_vPN, M_vPNml67	948834414, 1889883818, 5813077810, 761938645, 1037518512	GMR_49F09-x-VT050157	w[1118]; P{y[+t7.7] w[+mC]=R49F09-p65.AD}attP40; P{y[+t7.7] w[+mC]=VT050157-GAL4.DBD}attP2/TM6B, Tb[1]
SS01188	Adult	Yoshi Aso	Aso	2	N	No	No	10.7554/eLife.94168	Shuai; 2024	3016223	MBON05		GMR_53C03-x-VT043788	w[1118]; P{y[+t7.7] w[+mC]=R53C03-p65.AD}attP40; P{y[+t7.7] w[+mC]=VT043788-GAL4.DBD}attP2
SS01189	Adult	Yoshi Aso	Aso	1	N	No	No	10.7554/eLife.94168	Shuai; 2024	3016224	DA1_lPN	722817260, 754534424, 754538881, 1734350788, 1734350908, 1765040289, 5813039315	GMR_54A11-x-VT033006	w[1118]; P{y[+t7.7] w[+mC]=R54A11-p65.AD}attP40; P{y[+t7.7] w[+mC]=VT033006-GAL4.DBD}attP2
SS01196	Adult	Yoshi Aso	Aso	2	N	No	No	10.7554/eLife.94168	Shuai; 2024	3016231	VL2a_vPN, VL2p_vPN, DP1m_vPN	948834414, 1889883818, 5813077810, 824353701, 635048729	GMR_67A12-x-VT058720	w[1118]; P{y[+t7.7] w[+mC]=R67A12-p65.AD}attP40; P{y[+t7.7] w[+mC]=VT058720-GAL4.DBD}attP2
SS01197	Adult	Yoshi Aso	Aso	1	N	No	No	10.7554/eLife.94168	Shuai; 2024	3016232	M_vPNml89	481268653, 1694850602, 1819326555	GMR_67A12-x-VT015830	w[1118]; P{y[+t7.7] w[+mC]=R67A12-p65.AD}attP40; P{y[+t7.7] w[+mC]=VT015830-GAL4.DBD}attP2
SS01199	Adult	Yoshi Aso	Aso	1	N	No	Yes	10.7554/eLife.94168	Shuai; 2024	3016234	DA1_lPN, DM2_lPN	722817260, 754534424, 754538881, 1734350788, 1734350908, 1765040289, 5813039315 630714299, 5813050013, 5813054061, 5901222910	GMR_72C11_BB_04-x-BJD_115F09_AV_01	w[1118]; P{y[+t7.7] w[+mC]=VT033006-GAL4.DBD}attP2 PBac{y[+mDint2] w[+mC]=R72C11-p65.AD}VK00027
SS01202	Adult	Yoshi Aso	Aso	1	N	No	No	10.7554/eLife.94168	Shuai; 2024	3016237	M_vPNml56, M_vPNml58	667823920, 634707780, 636418270, 5813034081	GMR_76G04-x-VT058720	w[1118]; P{y[+t7.7] w[+mC]=R76G04-p65.AD}attP40; P{y[+t7.7] w[+mC]=VT058720-GAL4.DBD}attP2
SS01203	Adult	Yoshi Aso	Aso	2	N	No	No	10.7554/eLife.94168	Shuai; 2024	3016238	CRE051, CRE052, CRE053, CRE054	581678043, 673085197, 706840303, 5812982924, 612703762, 643739027, 674100160, 736173896, 672006007, 700321894, 829598814, 830634936, 862671913, 922354084, 5813033196, 5813082459	GMR_80G12-x-VT047171	w; 80G12-p65ADZp in attP40/CyO,Tb; VT047171-ZpGdbd in attP2
SS01208	Adult	Yoshi Aso	Aso	1	N	No	No	10.7554/eLife.94168	Shuai; 2024	3016243	OA-VPM4, MBDLaxon1_TBD (672598344)	767473384, 672598344	GMR_95A10-x-VT019391	w[1118]; P{y[+t7.7] w[+mC]=R95A10-p65.AD}attP40; P{y[+t7.7] w[+mC]=VT019391-GAL4.DBD}attP2
SS01210	Adult	Yoshi Aso	Aso	2	N	No	No	10.7554/eLife.94168	Shuai; 2024	3016245	OA-VPM4, OA-VUMa2	767473384, 638481581, 1670265016	GMR_TDC2-x-VT019841	w[1118]; P{y[+t7.7] w[+mC]=Tdc2-p65.AD}attP40; P{y[+t7.7] w[+mC]=VT019841-GAL4.DBD}attP2
SS01216	Adult	Yoshi Aso	Aso	2	N	No	No	10.7554/eLife.94168	Shuai; 2024	3016251			GMR_TDC2-x-VT046247	w[1118]; P{y[+t7.7] w[+mC]=Tdc2-p65.AD}attP40; P{y[+t7.7] w[+mC]=VT046247-GAL4.DBD}attP2
SS01217	Adult	Yoshi Aso	Aso	2	N	No	No	10.7554/eLife.94168	Shuai; 2024	3016252	OA-VPM3, OA-VPM4, OA-VUMa2	329566174, 5813061260 767473384 638481581, 1670265016	GMR_TDC2-x-VT039419	w[1118]; P{y[+t7.7] w[+mC]=Tdc2-p65.AD}attP40/CyO, P{w[+mC]=2xTb[1]-RFP}CyO; P{y[+t7.7] w[+mC]=VT039419-GAL4.DBD}attP2
SS01241	Adult	Yoshi Aso	Aso	2	N	No	No	10.7554/eLife.94168	Shuai; 2024	3016276	DPM	425276848, 5813105172	VT064246-x-GMR_13F04	w[1118]; P{y[+t7.7] w[+mC]=VT064246-p65.AD}attP40; P{y[+t7.7] w[+mC]=R13F04-GAL4.DBD}attP2/TM6B, Tb[1]
SS01262	Adult	Yoshi Aso	Aso	1	N	No	No	10.7554/eLife.94168	Shuai; 2024	3016297	M_lvPNm25, M_lvPNm26, M_lvPNm27, M_lvPNm28, M_lvPNm29, M_lvPNm30, M_lvPNm32	639276164, 1411784734 1730656082, 5812995328 1670973150 1670969304 1672293837 5813079228 329599710	VT029592-x-GMR_19B06	w[1118]; P{y[+t7.7] w[+mC]=VT029592-p65.AD}attP40; P{y[+t7.7] w[+mC]=R19B06-GAL4.DBD}attP2
SS01269	Adult	Yoshi Aso	Aso	1	N	No	Yes	10.7554/eLife.94168	Shuai; 2024	3016304	DL1_adPN	1484850301, 1670079387, 1700937093, 1700946301	VT033006-x-GMR_20G07	w[1118]; P{y[+t7.7] w[+mC]=VT033006-p65.AD}attP40; P{y[+t7.7] w[+mC]=R20G07-GAL4.DBD}attP2
SS01298	Adult	Yoshi Aso	Aso	2	N	No	No	10.7554/eLife.94168	Shuai; 2024	3016333	MBON16, MBON17	673366098, 5812981264	VT037580-x-GMR_24H08	w[1118]; P{y[+t7.7] w[+mC]=VT037580-p65.AD}attP40; P{y[+t7.7] w[+mC]=R24H08-GAL4.DBD}attP2/TM6B, Tb[1]
SS01308	Adult	Yoshi Aso	Aso	2	N	No	No	10.7554/eLife.94168	Shuai; 2024	3016343	MBON01	612371421, 673509195	VT050240-x-GMR_27G01	w[1118]; P{y[+t7.7] w[+mC]=VT050240-p65.AD}attP40; P{y[+t7.7] w[+mC]=R27G01-GAL4.DBD}attP2/TM6B, Tb[1]
SS01318	Adult	Yoshi Aso	Aso	1	N	No	No	10.7554/eLife.94168	Shuai; 2024	3016353	VM4_lvPN	726207450, 1850024931	VT033006-x-GMR_33H11	w[1118]; P{y[+t7.7] w[+mC]=VT033006-p65.AD}attP40; P{y[+t7.7] w[+mC]=R33H11-GAL4.DBD}attP2
SS01388	Adult	Yoshi Aso	Aso	1	N	No	No	10.7554/eLife.94168	Shuai; 2024	3016423	MBON22	985131499, 5813042659	VT063192-x-GMR_64F07	w[1118]; P{y[+t7.7] w[+mC]=VT063192-p65.AD}attP40; P{y[+t7.7] w[+mC]=R64F07-GAL4.DBD}attP2/TM6B, Tb[1]
SS01390	Adult	Yoshi Aso	Aso	1	N	No	No	10.7554/eLife.94168	Shuai; 2024	3016425	VA1d_adPN, VM4_lvPN	850375847, 1851061177, 5813055162, 726207450, 1850024931	VT033006-x-GMR_65D07	w[1118]; P{y[+t7.7] w[+mC]=VT033006-p65.AD}attP40; P{y[+t7.7] w[+mC]=R65D07-GAL4.DBD}attP2
SS01391	Adult	Yoshi Aso	Aso	2	N	No	No	10.7554/eLife.94168	Shuai; 2024	3016426	DA1_lPN, DL3_lPN, VM4_lvPN	722817260, 754534424, 754538881, 1734350788, 1734350908, 1765040289, 5813039315 1609542060, 1609883245, 1640568102 726207450, 1850024931	VT033006-x-GMR_66B02	w[1118]; P{y[+t7.7] w[+mC]=VT033006-p65.AD}attP40; P{y[+t7.7] w[+mC]=R66B02-GAL4.DBD}attP2
SS01396	Adult	Yoshi Aso	Aso	1	N	No	No	10.7554/eLife.94168	Shuai; 2024	3016431	MBON18, MBON28	457196444, 5813020828 457196643	VT007770-x-GMR_71D08	w[1118]; P{y[+t7.7] w[+mC]=VT007770-p65.AD}attP40; P{y[+t7.7] w[+mC]=R71D08-GAL4.DBD}attP2/TM6B, Tb[1]
SS01427	Adult	Yoshi Aso	Aso	2	N	No	No	10.7554/eLife.94168	Shuai; 2024	3016462	OA-VPM4	767473384	VT019391-x-GMR_TDC2	w[1118]; P{y[+t7.7] w[+mC]=VT019391-p65.AD}attP40; P{y[+t7.7] w[+mC]=Tdc2-GAL4.DBD}attP2/TM6B, Tb[1]
SS01828	Adult	Yoshi Aso	Aso	2	N	No	No	10.7554/eLife.94168	Shuai; 2024	3017155	PS104, VP3+_vPN	1501074095, 1501074228, 1501074253 663432544	BJD_115B03_BB_21-x-BJD_123G12_AV_01	w[1118]; P{y[+t7.7] w[+mC]=VT065322-p65.AD}attP40; P{y[+t7.7] w[+mC]=VT048884-GAL4.DBD}attP2
SS01845	Adult	Yoshi Aso	Aso	1	N	No	No	10.7554/eLife.94168	Shuai; 2024	3017172	M_vPNml60, M_vPNml61, M_vPNml62	5812983053, 975457916, 976830572 1039237469, 1070613107 947513805	BJD_123D08_BB_21-x-BJD_105F10_AV_01	w[1118]; P{y[+t7.7] w[+mC]=VT015830-p65.AD}attP40; P{y[+t7.7] w[+mC]=VT057245-GAL4.DBD}attP2
SS01850	Adult	Yoshi Aso	Aso	1	N	No	No	10.7554/eLife.94168	Shuai; 2024	3017177	VL2a_vPN	948834414, 1889883818, 5813077810	GMR_24H08_XA_21-x-BJD_105F10_AV_01	w[1118]; P{y[+t7.7] w[+mC]=R24H08-p65.AD}attP40; P{y[+t7.7] w[+mC]=VT057245-GAL4.DBD}attP2
SS01854	Adult	Yoshi Aso	Aso	2	N	No	No	10.7554/eLife.94168	Shuai; 2024	3017181	VL2a_vPN, VL2p_vPN	948834414, 1889883818, 5813077810, 824353701	GMR_45F05_BB_21-x-BJD_105F10_AV_01	w[1118]; P{y[+t7.7] w[+mC]=R45F05-p65.AD}attP40; P{y[+t7.7] w[+mC]=VT057245-GAL4.DBD}attP2
SS01868	Adult	Yoshi Aso	Aso	1	N	No	Yes	10.7554/eLife.94168	Shuai; 2024	3017226	VL2p_vPN	824353701	GMR_76G04-x-VT057245	w[1118]; P{y[+t7.7] w[+mC]=R76G04-p65.AD}attP40; P{y[+t7.7] w[+mC]=VT057245-GAL4.DBD}attP2
SS02052	Adult	Yoshi Aso	Aso	2	N	No	No	10.7554/eLife.94168	Shuai; 2024	3017421	SAD077, SAD078, TBD (1622191254)	944249308, 975289165, 1099073905, 1130458829, 1005624122, 2000792054, 2247336031, 1622191254	GMR_12C04_XA_21-x-GMR_14B03_AV_01	w[1118]; P{y[+t7.7] w[+mC]=R12C04-p65.AD}attP40; P{y[+t7.7] w[+mC]=R14B03-GAL4.DBD}attP2
SS12089	Adult	Yoshi Aso	Aso	1	N	No	Yes	10.7554/eLife.94168	Shuai; 2024	3028822	PVLP004, PVLP007, PVLP008_a	858838467, 889194759, 889531496, 949904655, 1073354203, 1073354472, 1073694558, 1293688646, 1720333334, 5813058416, 5813062942, 5813110223, 581262846, 644001906, 736748242, 737093692, 737093754, 798132291, 5813057854, 519909788, 674687388, 828826327, 858838262, 889535602, 5813026724	VT018764-x-GMR_18C12	w[1118]; P{y[+t7.7] w[+mC]=VT018764-p65.AD}attP40; P{y[+t7.7] w[+mC]=R18C12-GAL4.DBD}attP2
SS16659	Adult	Yoshi Aso	Aso	1	N	No	Yes	10.7554/eLife.94168	Shuai; 2024	3024080	LHAD1c2	424776680, 424780893, 424781115, 425121959, 551298257	GMR_65D05-x-GMR_66B12	w[1118]; P{y[+t7.7] w[+mC]=R65D05-p65.AD}attP40; P{y[+t7.7] w[+mC]=R66B12-GAL4.DBD}attP2
SS25297	Adult	Yoshi Aso	Aso	1	N	No	No	10.7554/eLife.94168	Shuai; 2024	3024417	CL357, CL358, MeVC27, OLVC4	511686666, 5813078595 1070332560, 5813070050	GMR_10D10-x-GMR_70C05	w[1118]; P{y[+t7.7] w[+mC]=R10D10-p65.AD}attP40; P{y[+t7.7] w[+mC]=R70C05-GAL4.DBD}attP2
SS32193	Adult	Yoshi Aso	Aso	1	N	No	No	10.7554/eLife.94168	Shuai; 2024	3026956	M_l2PNl22	1793403571	VT043241-x-GMR_86A05	w[1118]; P{y[+t7.7] w[+mC]=VT043241-p65.AD}attP40; P{y[+t7.7] w[+mC]=R86A05-GAL4.DBD}attP2
SS32194	Adult	Yoshi Aso	Aso	2	N	No	No	10.7554/eLife.94168	Shuai; 2024	3026957	SLP374	420221276	VT046099-x-GMR_48F07	w[1118]; P{y[+t7.7] w[+mC]=VT046099-p65.AD}attP40/CyO; P{y[+t7.7] w[+mC]=R48F07-GAL4.DBD}attP2
SS32205	Adult	Yoshi Aso	Aso	1	N	No	Yes	10.7554/eLife.94168	Shuai; 2024	3026967	DL1_adPN, D_adPN	1484850301, 1670079387, 1700937093, 1700946301 1536947502, 1671076884, 5812994744, 5813038889, 5813055184	VT033006-x-GMR_14A02	w[1118]; P{y[+t7.7] w[+mC]=VT033006-p65.AD}attP40/CyO; P{y[+t7.7] w[+mC]=R14A02-GAL4.DBD}attP2/TM6B, Tb[1]
SS32226	Adult	Yoshi Aso	Aso	1	N	No	No	10.7554/eLife.94168	Shuai; 2024	3025277	SIP041, SIP044, SIP050, SMP210	640281116, 701327912 456152222, 456152258 422401750, 547888586 510278853, 540972196, 675119034	VT008485-x-VT040847	w[1118]; P{y[+t7.7] w[+mC]=VT008485-p65.AD}attP40; P{y[+t7.7] w[+mC]=VT040847-GAL4.DBD}attP2
SS32228	Adult	Yoshi Aso	Aso	2	N	No	No	10.7554/eLife.94168	Shuai; 2024	3026986	SMP146	268731005, 299289811	VT040004-x-VT020600	w[1118]; P{y[+t7.7] w[+mC]=VT040004-p65.AD}attP40; P{y[+t7.7] w[+mC]=VT020600-GAL4.DBD}attP2
SS32229	Adult	Yoshi Aso	Aso	1	N	No	No	10.7554/eLife.94168	Shuai; 2024	3026987	VP5, VP3_l2PN	2065197353	VT019428-x-GMR_87F12	w[1118]; P{y[+t7.7] w[+mC]=VT019428-p65.AD}attP40; P{y[+t7.7] w[+mC]=R87F12-GAL4.DBD}attP2
SS32233	Adult	Yoshi Aso	Aso	2	N	No	No	10.7554/eLife.94168	Shuai; 2024	3026991			VT050734-x-GMR_87D09	w[1118]; P{y[+t7.7] w[+mC]=VT050734-p65.AD}attP40; P{y[+t7.7] w[+mC]=R87D09-GAL4.DBD}attP2
SS32235	Adult	Yoshi Aso	Aso	1	N	No	Yes	10.7554/eLife.94168	Shuai; 2024	3026992	SMP591	454822542, 487212916, 514833145, 5813011133, 5813033443	GMR_10D10-x-VT045235	w[1118]; P{y[+t7.7] w[+mC]=R10D10-p65.AD}attP40/CyO; P{y[+t7.7] w[+mC]=VT045235-GAL4.DBD}attP2/TM6B, Tb[1]
SS32256	Adult	Gerry Rubin	Rubin	2	N	No	No	10.7554/eLife.94168	Shuai; 2024	3027007	unknown cell type		GMR_29E04-x-VT013618	w[1118]; P{y[+t7.7] w[+mC]=R29E04-p65.AD}attP40/CyO; P{y[+t7.7] w[+mC]=VT013618-GAL4.DBD}attP2
SS32259	Adult	Yoshi Aso	Aso	2	N	No	No	10.7554/eLife.94168	Shuai; 2024	3027009	5-HTPMPD01	297230760, 297908801	GMR_46C02-x-GMR_13F04	w[1118]; P{y[+t7.7] w[+mC]=R46C02-p65.AD}attP40/CyO; P{y[+t7.7] w[+mC]=R13F04-GAL4.DBD}attP2/TM6B, Tb[1]
SS32261	Adult	Gerry Rubin	Rubin	1	N	No	No	10.7554/eLife.94168	Shuai; 2024	3027011	olfactory PN		GMR_47F09-x-VT033006	w[1118]; P{y[+t7.7] w[+mC]=R47F09-p65.AD}attP40; P{y[+t7.7] w[+mC]=VT033006-GAL4.DBD}attP2
SS32274	Adult	Gerry Rubin	Rubin	1	N	No	No	10.7554/eLife.94168	Shuai; 2024	3027021	olfactory PN		GMR_73F07-x-VT033006	w[1118]; P{y[+t7.7] w[+mC]=R73F07-p65.AD}attP40; P{y[+t7.7] w[+mC]=VT033006-GAL4.DBD}attP2
SS33905	Adult	Yoshi Aso	Aso	1	N	No	No	10.7554/eLife.94168	Shuai; 2024	3025254	DSKMP3	327937328, 328559607	VT033047-x-VT003236	w[1118]; P{y[+t7.7] w[+mC]=VT033047-p65.AD}attP40; P{y[+t7.7] w[+mC]=VT003236-GAL4.DBD}attP2
SS33908	Adult	Yoshi Aso	Aso	3	N	No	No	10.7554/eLife.94168	Shuai; 2024	3027031			VT034628-x-GMR_71G01	w[1118]; P{y[+t7.7] w[+mC]=VT034628-p65.AD}attP40/CyO; P{y[+t7.7] w[+mC]=R71G01-GAL4.DBD}attP2
SS33915	Adult	Yoshi Aso	Aso	1	N	No	No	10.7554/eLife.94168	Shuai; 2024	3025270	VP1m, _lvPN	663787020, 664814903	VT037537-x-VT007764	w[1118]; P{y[+t7.7] w[+mC]=VT037537-p65.AD}attP40; P{y[+t7.7] w[+mC]=VT007764-GAL4.DBD}attP2
SS33917	Adult	Yoshi Aso	Aso	1	N	No	No	10.7554/eLife.94168	Shuai; 2024	3025283			VT007746-x-GMR_64A11	w[1118]; P{y[+t7.7] w[+mC]=VT007746-p65.AD}attP40; P{y[+t7.7] w[+mC]=R64A11-GAL4.DBD}attP2
SS33919	Adult	Yoshi Aso	Aso	2	N	No	No	10.7554/eLife.94168	Shuai; 2024	3027022			VT050734-x-VT026019	w[1118]; P{y[+t7.7] w[+mC]=VT050734-p65.AD}attP40; P{y[+t7.7] w[+mC]=VT026019-GAL4.DBD}attP2/TM6C, Tb[1]
SS33920	Adult	Yoshi Aso	Aso	1	N	No	No	10.7554/eLife.94168	Shuai; 2024	3027023	l2LN23	2069647778, 2069648213	VT047885-x-GMR_23C06	w[1118]; P{y[+t7.7] w[+mC]=VT047885-p65.AD}attP40/CyO; P{y[+t7.7] w[+mC]=R23C06-GAL4.DBD}attP2/TM6B, Tb[1]
SS35043	Adult	Yoshi Aso	Aso	1	N	No	Yes	10.7554/eLife.94168	Shuai; 2024	3026357	VC3l_adPN, VC4_adPN, VM5d_adPN, VM5v_adPN, D_adPN	693125078, 1914823337, 5813000276 754854077, 788306724, 5813055147 1006258344, 1547273567, 1693577325, 1856259388, 1888572074, 1914140664, 1914823414, 5813024712 1887971628, 2010992546, 5813034571 1536947502, 1671076884, 5812994744, 5813038889, 5813055184	GMR_42D01-x-GMR_54F05	w[1118]; P{y[+t7.7] w[+mC]=R42D01-p65.AD}attP40; P{y[+t7.7] w[+mC]=R54F05-GAL4.DBD}attP2/TM6B, Tb[1]
SS35094	Adult	Yoshi Aso	Aso	1	N	No	Yes	10.7554/eLife.94168	Shuai; 2024	3026368	VA1d_adPN	850375847, 1851061177, 5813055162	GMR_80A09-x-GMR_82E08	w[1118]; P{y[+t7.7] w[+mC]=R80A09-p65.AD}attP40; P{y[+t7.7] w[+mC]=R82E08-GAL4.DBD}attP2
SS35224	Adult	Yoshi Aso	Aso	2	N	No	No	10.7554/eLife.94168	Shuai; 2024	3025245	AN_TBD (2131597754), AN_TBD (2225755564), AN_TBD (1197455268), AN_TBD (1290222901)	2131597754 2225755564 1197455268 1290222901	GMR_41C05-x-VT018700	w[1118]; P{y[+t7.7] w[+mC]=R41C05-p65.AD}attP40; P{y[+t7.7] w[+mC]=VT018700-GAL4.DBD}attP2
SS35225	Adult	Yoshi Aso	Aso	2	N	No	No	10.7554/eLife.94168	Shuai; 2024	3025246	AN_TBD (1197455013), AN_TBD (1197455268), AN_TBD (1414724312)	1197455013 1197455268 1414724312	GMR_41C05-x-VT018700	w[1118]; P{y[+t7.7] w[+mC]=VT018700-GAL4.DBD}attP2 P{y[+t7.7] w[+mC]=R41C05-p65.AD}JK73A/TM3, Sb[1]
SS35227	Adult	Yoshi Aso	Aso	2	N	No	No	10.7554/eLife.94168	Shuai; 2024	3025249			GMR_41C05-x-VT050663	w[1118]; P{y[+t7.7] w[+mC]=R41C05-p65.AD}attP40; P{y[+t7.7] w[+mC]=VT050663-GAL4.DBD}attP2
SS35230	Adult	Yoshi Aso	Aso	2	Y	No	No	10.7554/eLife.94168	Shuai; 2024	3025252			GMR_41C05-x-VT050247	w[1118]; P{y[+t7.7] w[+mC]=VT050247-GAL4.DBD}attP2 P{y[+t7.7] w[+mC]=R41C05-p65.AD}JK73A/TM3, Sb[1]
SS35234	Adult	Yoshi Aso	Aso	2	N	No	No	10.7554/eLife.94168	Shuai; 2024	3025257			GMR_41C05-x-VT040047	w[1118]; P{y[+t7.7] w[+mC]=R41C05-p65.AD}attP40; P{y[+t7.7] w[+mC]=VT040047-GAL4.DBD}attP2
SS35236	Adult	Yoshi Aso	Aso	2	N	No	No	10.7554/eLife.94168	Shuai; 2024	3025260			GMR_41C05-x-VT032912	w[1118]; P{y[+t7.7] w[+mC]=R41C05-p65.AD}attP40; P{y[+t7.7] w[+mC]=VT032912-GAL4.DBD}attP2
SS35241	Adult	Yoshi Aso	Aso	2	N	No	No	10.7554/eLife.94168	Shuai; 2024	3025265			GMR_41C05-x-VT002043	w[1118]; P{y[+t7.7] w[+mC]=R41C05-p65.AD}attP40; P{y[+t7.7] w[+mC]=VT002043-GAL4.DBD}attP2
SS35248	Adult	Yoshi Aso	Aso	2	N	No	No	10.7554/eLife.94168	Shuai; 2024	3025275			GMR_41C05-x-VT014099	w[1118]; P{y[+t7.7] w[+mC]=R41C05-p65.AD}attP40; P{y[+t7.7] w[+mC]=VT014099-GAL4.DBD}attP2/TM6B, Tb[1]
SS35253	Adult	Yoshi Aso	Aso	2	N	No	No	10.7554/eLife.94168	Shuai; 2024	3025281			GMR_41C05-x-VT042832	w[1118]; P{y[+t7.7] w[+mC]=R41C05-p65.AD}attP40; P{y[+t7.7] w[+mC]=VT042832-GAL4.DBD}attP2
SS35256	Adult	Yoshi Aso	Aso	1	N	No	No	10.7554/eLife.94168	Shuai; 2024	3025288	AN_TBD (1505123111)	1505123111	GMR_41C05-x-GMR_79C11	w[1118]; P{y[+t7.7] w[+mC]=R41C05-p65.AD}attP40; P{y[+t7.7] w[+mC]=R79C11-GAL4.DBD}attP2
SS35317	Adult	Yoshi Aso	Aso	1	N	No	No	10.7554/eLife.94168	Shuai; 2024	3031434			VT007746-x-VT002042	w[1118]; P{y[+t7.7] w[+mC]=VT007746-p65.AD}attP40; P{y[+t7.7] w[+mC]=VT002042-GAL4.DBD}attP2/TM6B, Tb[1]
SS39617	Adult	Yoshi Aso	Aso	2	Y	No	No	10.7554/eLife.94168	Shuai; 2024	3028674	AVLP569, CL313	1292022825, 1351679002 1135160387, 1167882816, 1260655256, 1351674644, 5813067886	GMR_20G10-x-GMR_11F12	w[1118]; P{y[+t7.7] w[+mC]=R20G10-p65.AD}attP40; P{y[+t7.7] w[+mC]=R11F12-GAL4.DBD}attP2
SS45229	Adult	Yoshi Aso	Aso	2	N	No	No	10.7554/eLife.94168	Shuai; 2024	3027043	M_spPN5t10, LAL183	731690040, 1733370882 915105102, 5813078438	VT061711-x-VT019398	w[1118]; P{y[+t7.7] w[+mC]=VT061711-p65.AD}attP40; P{y[+t7.7] w[+mC]=VT019398-GAL4.DBD}attP2
SS45231	Adult	Yoshi Aso	Aso	1	N	No	No	10.7554/eLife.94168	Shuai; 2024	3036955	VES037, SMP108	919206921, 1284852376, 1875962033, 298258513, 361445621	VT026646-x-VT026846	w[1118]; P{y[+t7.7] w[+mC]=VT026646-p65.AD}attP40/CyO, P{w[+mC]=2xTb[1]-RFP}CyO; P{y[+t7.7] w[+mC]=VT026846-GAL4.DBD}attP2
SS48335	Adult	Yoshi Aso	Aso	2	N	No	No	10.7554/eLife.94168	Shuai; 2024	3028826			VT008882-x-GMR_68C01	w[1118]; P{y[+t7.7] w[+mC]=VT008882-p65.AD}attP40; P{y[+t7.7] w[+mC]=R68C01-GAL4.DBD}attP2
SS48336	Adult	Yoshi Aso	Aso	2	N	No	No	10.7554/eLife.94168	Shuai; 2024	3028540			VT008646-x-GMR_49C12	w[1118]; P{y[+t7.7] w[+mC]=VT008646-p65.AD}attP40/CyO, P{w[+mC]=2xTb[1]-RFP}CyO; P{y[+t7.7] w[+mC]=R49C12-GAL4.DBD}attP2
SS48339	Adult	Yoshi Aso	Aso	2	N	No	No	10.7554/eLife.94168	Shuai; 2024	3028815	TBD (1416796844)	1416796844	VT021853-x-GMR_10G03	w[1118]; P{y[+t7.7] w[+mC]=VT021853-p65.AD}attP40; P{y[+t7.7] w[+mC]=R10G03-GAL4.DBD}attP2
SS48598	Adult	Yoshi Aso	Aso	2	N	No	No	10.7554/eLife.94168	Shuai; 2024	3028829	PI1_c	206555682, 270322941, 301037686, 331411807, 5813026416, 5813061389	VT026024-x-GMR_30H05	w[1118]; P{y[+t7.7] w[+mC]=VT026024-p65.AD}attP40; P{y[+t7.7] w[+mC]=R30H05-GAL4.DBD}attP2
SS48777	Adult	Yoshi Aso	Aso	1	Y	No	Yes	10.7554/eLife.94168	Shuai; 2024	3028534	aIPg1, aIPg2, aIPg3, aIPg4	707854989, 707858790, 707863263, 1138212774 645456880, 676479156, 1882009576, 5813022814, 5813035694 768590452, 5813098975 861251038, 5813068484	VT043699-x-VT064565	w[1118]; P{y[+t7.7] w[+mC]=VT043699-p65.AD}attP40/CyO, P{w[+mC]=2xTb[1]-RFP}CyO; P{y[+t7.7] w[+mC]=VT064565-GAL4.DBD}attP2
SS48784	Adult	Yoshi Aso	Aso	1	N	No	No	10.7554/eLife.94168	Shuai; 2024	3029553			VT045661-x-VT044178	w[1118]; P{y[+t7.7] w[+mC]=VT045661-p65.AD}attP40; P{y[+t7.7] w[+mC]=VT044178-GAL4.DBD}attP2
SS48787	Adult	Yoshi Aso	Aso	1	N	No	No	10.7554/eLife.94168	Shuai; 2024	3028536			VT046776-x-VT029814	w[1118]; P{y[+t7.7] w[+mC]=VT046776-p65.AD}attP40; P{y[+t7.7] w[+mC]=VT029814-GAL4.DBD}attP2
SS48788	Adult	Yoshi Aso	Aso	1	N	No	No	10.7554/eLife.94168	Shuai; 2024	3029542	TBD (1253230158)	1253230158	VT048843-x-VT019079	w[1118]; P{y[+t7.7] w[+mC]=VT048843-p65.AD}attP40; P{y[+t7.7] w[+mC]=VT019079-GAL4.DBD}attP2
SS48794	Adult	Yoshi Aso	Aso	2	N	No	No	10.7554/eLife.94168	Shuai; 2024	3028537	OA-VUMa2	638481581, 1670265016	VT025925-x-VT058566	w[1118]; P{y[+t7.7] w[+mC]=VT025925-p65.AD}attP40/CyO, P{w[+mC]=2xTb[1]-RFP}CyO; P{y[+t7.7] w[+mC]=VT058566-GAL4.DBD}attP2
SS48834	Adult	Yoshi Aso	Aso	1	N	No	Yes	10.7554/eLife.94168	Shuai; 2024	3028817	PVLP004	858838467, 889194759, 889531496, 949904655, 1073354203, 1073354472, …	VT008474-x-GMR_53G06	w[1118]; P{y[+t7.7] w[+mC]=VT008474-p65.AD}attP40; P{y[+t7.7] w[+mC]=R53G06-GAL4.DBD}attP2
SS48866	Adult	Yoshi Aso	Aso	2	N	No	No	10.7554/eLife.94168	Shuai; 2024	3028818	PVLP004, PVLP006	858838467, 889194759, 889531496, 949904655, 1073354203, 1073354472, …, 1073691439, 5813048443	GMR_25A01-x-GMR_53G06	w[1118]; P{y[+t7.7] w[+mC]=R25A01-p65.AD}attP40/CyO, P{w[+mC]=2xTb[1]-RFP}CyO; P{y[+t7.7] w[+mC]=R53G06-GAL4.DBD}attP2/TM6B, Tb[1]
SS48892	Adult	Yoshi Aso	Aso	2	N	No	No	10.7554/eLife.94168	Shuai; 2024	3028804	CL003	549175510	GMR_73H08-x-VT019731	w[1118]; P{y[+t7.7] w[+mC]=R73H08-p65.AD}attP40; P{y[+t7.7] w[+mC]=VT019731-GAL4.DBD}attP2
SS48918	Adult	Yoshi Aso	Aso	2	N	No	No	10.7554/eLife.94168	Shuai; 2024	3029533			VT008646-x-VT025604	w[1118]; P{y[+t7.7] w[+mC]=VT008646-p65.AD}attP40/CyO, P{w[+mC]=2xTb[1]-RFP}CyO; P{y[+t7.7] w[+mC]=VT025604-GAL4.DBD}attP2
SS49267	Adult	Yoshi Aso	Aso	1	N	No	No	10.7554/eLife.94168	Shuai; 2024	3029600	AN_TBD (1044330963)	1044330963	VT000771-x-GMR_71A10	w[1118]; P{y[+t7.7] w[+mC]=VT000771-p65.AD}attP40; P{y[+t7.7] w[+mC]=R71A10-GAL4.DBD}attP2
SS49298	Adult	Yoshi Aso	Aso	2	N	No	No	10.7554/eLife.94168	Shuai; 2024	3028798	VC3l_adPN, VM5d_adPN, VM5v_adPN, VM4_lvPN	693125078, 1914823337, 5813000276, 1006258344, 1547273567, 1693577325, 1856259388, 1888572074, 1914140664, 1914823414, 5813024712, 1887971628, 2010992546, 5813034571, 726207450, 1850024931	VT033006-x-VT040053	w[1118]; P{y[+t7.7] w[+mC]=VT033006-p65.AD}attP40; P{y[+t7.7] w[+mC]=VT040053-GAL4.DBD}attP2
SS49300	Adult	Yoshi Aso	Aso	1	N	No	No	10.7554/eLife.94168	Shuai; 2024	3029564	AN_TBD (5813047188)	5813047188	VT065317-x-VT061918	w[1118]; P{y[+t7.7] w[+mC]=VT065317-p65.AD}attP40; P{y[+t7.7] w[+mC]=VT061918-GAL4.DBD}attP2
SS49304	Adult	Yoshi Aso	Aso	1	N	No	No	10.7554/eLife.94168	Shuai; 2024	3028619	M_lPNm11A	819993149, 1630734360, 5813044177	GMR_22C06-x-VT040552	w[1118]; P{y[+t7.7] w[+mC]=R22C06-p65.AD}attP40; P{y[+t7.7] w[+mC]=VT040552-GAL4.DBD}attP2
SS49306	Adult	Yoshi Aso	Aso	1	N	No	Yes	10.7554/eLife.94168	Shuai; 2024	3028629	DM5_lPN	635416407, 697485362, 5901195610	GMR_22C06-x-VT033006	w[1118]; P{y[+t7.7] w[+mC]=R22C06-p65.AD}attP40; P{y[+t7.7] w[+mC]=VT033006-GAL4.DBD}attP2/TM6B, Tb[1]
SS49345	Adult	Yoshi Aso	Aso	1	N	No	No	10.7554/eLife.94168	Shuai; 2024	3028824	Z_vPNml1, AVLP447	792364888, 761325477	GMR_48A03-x-GMR_85F12	w[1118]; P{y[+t7.7] w[+mC]=R48A03-p65.AD}attP40; P{y[+t7.7] w[+mC]=R85F12-GAL4.DBD}attP2
SS49352	Adult	Yoshi Aso	Aso	1	N	No	No	10.7554/eLife.94168	Shuai; 2024	3028830	mAL3B	578189223, 610571450, 668876945, 703351975, 5812980330	GMR_52F01-x-GMR_70H11	w[1118]; P{y[+t7.7] w[+mC]=R52F01-p65.AD}attP40; P{y[+t7.7] w[+mC]=R70H11-GAL4.DBD}attP2/TM6B, Tb[1]
SS49755	Adult	Yoshi Aso	Aso	1	N	No	No	10.7554/eLife.94168	Shuai; 2024	3028811			GMR_56B05-x-GMR_84B09	w[1118]; P{y[+t7.7] w[+mC]=R56B05-p65.AD}attP40; P{y[+t7.7] w[+mC]=R84B09-GAL4.DBD}attP2
SS49868	Adult	Yoshi Aso	Aso	2	N	No	No	10.7554/eLife.94168	Shuai; 2024	3028809	AVLP462	1413744837, 1445112287, 1753195131	VT008650-x-VT036781	w[1118]; P{y[+t7.7] w[+mC]=VT008650-p65.AD}attP40; P{y[+t7.7] w[+mC]=VT036781-GAL4.DBD}attP2
SS49882	Adult	Yoshi Aso	Aso	2	N	No	No	10.7554/eLife.94168	Shuai; 2024	3028558	VES019, LAL098	1502532477, 1720088459 1728942250	VT039475-x-VT045661	w[1118]; P{y[+t7.7] w[+mC]=VT039475-p65.AD}attP40; P{y[+t7.7] w[+mC]=VT045661-GAL4.DBD}attP2
SS49890	Adult	Yoshi Aso	Aso	1	N	No	No	10.7554/eLife.94168	Shuai; 2024	3029574	AN_TBD (1750733958), AN_TBD (1782447437)	1750733958 1782447437	VT002218-x-GMR_54H04	w[1118]; P{y[+t7.7] w[+mC]=VT002218-p65.AD}attP40; P{y[+t7.7] w[+mC]=R54H04-GAL4.DBD}attP2
SS49896	Adult	Yoshi Aso	Aso	2	N	No	No	10.7554/eLife.94168	Shuai; 2024	3028543	SMP319, SMP320	542691005, 5812981228 417908800, 479637825, 480987689, 512014262, 5812981506, 5813021225	GMR_26C06-x-VT021379	w[1118]; P{y[+t7.7] w[+mC]=VT021379-GAL4.DBD}attP2 PBac{y[+mDint2] w[+mC]=R26C06-p65.AD}VK00027
SS67219	Adult	Yoshi Aso	Aso	2	N	No	No	10.7554/eLife.94168	Shuai; 2024	3036476			VT007746-x-VT063301	w[1118]; P{y[+t7.7] w[+mC]=VT007746-p65.AD}attP40; P{y[+t7.7] w[+mC]=VT063301-GAL4.DBD}attP2
SS67221	Adult	Yoshi Aso	Aso	1	N	No	No	10.7554/eLife.94168	Shuai; 2024	3036477	SMP108	298258513, 361445621	VT026646-x-VT019911	w[1118]; P{y[+t7.7] w[+mC]=VT026646-p65.AD}attP40; P{y[+t7.7] w[+mC]=VT019911-GAL4.DBD}attP2
SS67238	Adult	Yoshi Aso	Aso	1	N	No	Yes	10.7554/eLife.94168	Shuai; 2024	3036483			VT007746-x-VT027738	w[1118]; P{y[+t7.7] w[+mC]=VT007746-p65.AD}attP40; P{y[+t7.7] w[+mC]=VT027738-GAL4.DBD}attP2
SS67241	Adult	Yoshi Aso	Aso	1	N	No	No	10.7554/eLife.94168	Shuai; 2024	3036485	PVLP049, WED047	1445743278, 1479134215 1411314129, 1753112545, 1753117041	VT026646-x-GMR_51H04	w[1118]; P{y[+t7.7] w[+mC]=VT026646-p65.AD}attP40; P{y[+t7.7] w[+mC]=R51H04-GAL4.DBD}attP2
SS67248	Adult	Yoshi Aso	Aso	2	Y	No	No	10.7554/eLife.94168	Shuai; 2024	3036487			VT025965-x-GMR_64A11	w[1118]; P{y[+t7.7] w[+mC]=VT025965-p65.AD}attP40; P{y[+t7.7] w[+mC]=R64A11-GAL4.DBD}attP2
SS67254	Adult	Yoshi Aso	Aso	2	N	No	No	10.7554/eLife.94168	Shuai; 2024	3036490			VT038816-x-GMR_66B12	w[1118]; P{y[+t7.7] w[+mC]=VT038816-p65.AD}attP40/CyO, P{w[+mC]=2xTb[1]-RFP}CyO; P{y[+t7.7] w[+mC]=R66B12-GAL4.DBD}attP2
SS68128	Adult	Yoshi Aso	Aso	1	N	No	Yes	10.7554/eLife.94168	Shuai; 2024	3036961			VT045617-x-GMR_66B12	w[1118]; P{y[+t7.7] w[+mC]=VT045617-p65.AD}attP40; P{y[+t7.7] w[+mC]=R66B12-GAL4.DBD}attP2
SS68135	Adult	Yoshi Aso	Aso	1	N	No	Yes	10.7554/eLife.94168	Shuai; 2024	3036962			VT057342-x-GMR_66B12	w[1118]; P{y[+t7.7] w[+mC]=VT057342-p65.AD}attP40/CyO, P{w[+mC]=2xTb[1]-RFP}CyO; P{y[+t7.7] w[+mC]=R66B12-GAL4.DBD}attP2
SS68157	Adult	Yoshi Aso	Aso	1	N	No	No	10.7554/eLife.94168	Shuai; 2024	3036960			GMR_26D04-x-GMR_64A11	w[1118]; P{y[+t7.7] w[+mC]=R26D04-p65.AD}attP40; P{y[+t7.7] w[+mC]=R64A11-GAL4.DBD}attP2
SS68158	Adult	Yoshi Aso	Aso	1	N	No	No	10.7554/eLife.94168	Shuai; 2024	3036967			GMR_26D04-x-GMR_66B12	w[1118]; P{y[+t7.7] w[+mC]=R26D04-p65.AD}attP40; P{y[+t7.7] w[+mC]=R66B12-GAL4.DBD}attP2/TM6B, Tb[1]
SS69402	Adult	Yoshi Aso	Aso	1	N	No	No	10.7554/eLife.94168	Shuai; 2024	3036718			VT007746-x-GMR_64A11	w[1118]; P{y[+t7.7] w[+mC]=R64A11-GAL4.DBD}JK22C P{y[+t7.7] w[+mC]=VT007746-p65.AD}attP40
SS69945	Adult	Yoshi Aso	Aso	2	N	No	No	10.7554/eLife.94168	Shuai; 2024	3037247	SMP549	329566197, 455229034	VT038816-x-GMR_53G12	w[1118]; P{y[+t7.7] w[+mC]=VT038816-p65.AD}attP40; P{y[+t7.7] w[+mC]=R53G12-GAL4.DBD}attP2
SS69962	Adult	Yoshi Aso	Aso	1	N	No	No	10.7554/eLife.94168	Shuai; 2024	3037246	SLP363	294428266	VT014554-x-GMR_12E09	w[1118]; P{y[+t7.7] w[+mC]=VT014554-p65.AD}attP40; P{y[+t7.7] w[+mC]=R12E09-GAL4.DBD}attP2
SS69977	Adult	Yoshi Aso	Aso	2	N	No	No	10.7554/eLife.94168	Shuai; 2024	3037229			VT025717-x-VT014554	w[1118]; P{y[+t7.7] w[+mC]=VT025717-p65.AD}attP40; P{y[+t7.7] w[+mC]=VT014554-GAL4.DBD}attP2
SS69983	Adult	Yoshi Aso	Aso	1	N	No	No	10.7554/eLife.94168	Shuai; 2024	3037242			VT025717-x-GMR_51H04	w[1118]; P{y[+t7.7] w[+mC]=VT025717-p65.AD}attP40; P{y[+t7.7] w[+mC]=R51H04-GAL4.DBD}attP2
SS70173	Adult	Yoshi Aso	Aso	1	N	No	No	10.7554/eLife.94168	Shuai; 2024	3037248	SMP424	386877197, 510676580	VT011311-x-GMR_53G12	w[1118]; P{y[+t7.7] w[+mC]=VT011311-p65.AD}attP40; P{y[+t7.7] w[+mC]=R53G12-GAL4.DBD}attP2
SS70178	Adult	Yoshi Aso	Aso	1	N	No	No	10.7554/eLife.94168	Shuai; 2024	3037240	SLP388, SLP440	297917459, 298258611 328870472	VT040698-x-VT038816	w[1118]; P{y[+t7.7] w[+mC]=VT040698-p65.AD}attP40; P{y[+t7.7] w[+mC]=VT038816-GAL4.DBD}attP2
SS70217	Adult	Yoshi Aso	Aso	2	Y	No	No	10.7554/eLife.94168	Shuai; 2024	3037224	MBDLaxon2_TBD (516943720)	516943720	VT009855-x-VT014718	w[1118]; P{y[+t7.7] w[+mC]=VT009855-p65.AD}attP40; P{y[+t7.7] w[+mC]=VT014718-GAL4.DBD}attP2
SS81024	Adult	Yoshi Aso	Aso	2	N	No	No	10.7554/eLife.94168	Shuai; 2024	3040670	MBDLaxon1_TBD (482071823)	482071823	GMR_24A02-x-GMR_21F07	w[1118]; P{y[+t7.7] w[+mC]=R24A02-p65.AD}attP40/CyO, P{w[+mC]=2xTb[1]-RFP}CyO; P{y[+t7.7] w[+mC]=R21F07-GAL4.DBD}attP2/TM6B, Tb[1]
SS81027	Adult	Yoshi Aso	Aso	1	N	No	No	10.7554/eLife.94168	Shuai; 2024	3040671	LHPV6a1	480590337, 480594756, 480599437, 480945354, 481627444, 511625768, 511626068, 511626286, 511966731, 543684107, 574468840, 758154573, 5813012322, 5813039907	GMR_78B06-x-VT037023	w[1118]; P{y[+t7.7] w[+mC]=R78B06-p65.AD}attP40; P{y[+t7.7] w[+mC]=VT037023-GAL4.DBD}attP2
SS81054	Adult	Yoshi Aso	Aso	2	N	No	No	10.7554/eLife.94168	Shuai; 2024	3040678	SMP084, SMP106	297917363, 297925608, 331774819, 392130578 519957346, 550318785, 550651224, 551333454, 551666144, 551669824, 583024065, 583024625, 5812980299	GMR_33H04-x-VT038787	w[1118]; P{y[+t7.7] w[+mC]=R33H04-p65.AD}attP40; P{y[+t7.7] w[+mC]=VT038787-GAL4.DBD}attP2
SS81068	Adult	Yoshi Aso	Aso	1	N	No	No	10.7554/eLife.94168	Shuai; 2024	3040685	OA-VPM3	329566174, 5813061260	VT008176-x-VT058566	w[1118]; P{y[+t7.7] w[+mC]=VT008176-p65.AD}attP40/CyO, P{w[+mC]=2xTb[1]-RFP}CyO; P{y[+t7.7] w[+mC]=VT058566-GAL4.DBD}attP2
SS81072	Adult	Yoshi Aso	Aso	1	N	No	No	10.7554/eLife.94168	Shuai; 2024	3040688			GMR_26D04-x-VT057342	w[1118]; P{y[+t7.7] w[+mC]=R26D04-p65.AD}attP40; P{y[+t7.7] w[+mC]=VT057342-GAL4.DBD}attP2
SS81122	Adult	Yoshi Aso	Aso	1	N	No	No	10.7554/eLife.94168	Shuai; 2024	3040692	SLP391	298612190	VT028320-x-GMR_37G12	w[1118]; P{y[+t7.7] w[+mC]=VT028320-p65.AD}attP40; P{y[+t7.7] w[+mC]=R37G12-GAL4.DBD}attP2
SS81138	Adult	Yoshi Aso	Aso	1	N	No	No	10.7554/eLife.94168	Shuai; 2024	3040695	SMP496	542410481	GMR_37G12-x-GMR_50C10	w[1118]; P{y[+t7.7] w[+mC]=R37G12-p65.AD}attP40; P{y[+t7.7] w[+mC]=R50C10-GAL4.DBD}attP2
SS82405	Adult	Yoshi Aso	Aso	2	N	No	No	10.7554/eLife.94168	Shuai; 2024	3041092	SMP350	266873591, 296199026, 327937494	VT008974-x-GMR_48E02	w[1118]; P{y[+t7.7] w[+mC]=VT008974-p65.AD}attP40; P{y[+t7.7] w[+mC]=R48E02-GAL4.DBD}attP2
SS82503	Adult	Yoshi Aso	Aso	1	N	No	No	10.7554/eLife.94168	Shuai; 2024	3041103	LHAD1b3	451382570, 455828904, 5813047019	GMR_64A11-x-GMR_65G11	w[1118]; P{y[+t7.7] w[+mC]=R64A11-p65.AD}JK22C; P{y[+t7.7] w[+mC]=R65G11-GAL4.DBD}attP2
SS83861	Adult	Yoshi Aso	Aso	1	N	No	No	10.7554/eLife.94168	Shuai; 2024	3041079	SIP049	449209971, 578914626, 642693620	VT045636-x-VT008485	w[1118]; P{y[+t7.7] w[+mC]=VT045636-p65.AD}attP40/CyO, P{w[+mC]=2xTb[1]-RFP}CyO; P{y[+t7.7] w[+mC]=VT008485-GAL4.DBD}attP2/TM6B, Tb[1]
SS83894	Adult	Yoshi Aso	Aso	1	N	No	Yes	10.7554/eLife.94168	Shuai; 2024	3041086	SIP065	330320065, 5813021235	VT057255-x-VT032906	w[1118]; P{y[+t7.7] w[+mC]=VT057255-p65.AD}attP40; P{y[+t7.7] w[+mC]=VT032906-GAL4.DBD}attP2
SS83956	Adult	Yoshi Aso	Aso	2	N	No	No	10.7554/eLife.94168	Shuai; 2024	3041093			GMR_65E11-x-GMR_27G01	w[1118]; P{y[+t7.7] w[+mC]=R65E11-p65.AD}attP40; P{y[+t7.7] w[+mC]=R27G01-GAL4.DBD}attP2/TM6B, Tb[1]
SS85348	Adult	Yoshi Aso	Aso	2	N	No	No	10.7554/eLife.94168	Shuai; 2024	3041552	CRE055	673362451, 796836697, 797187575, 798908816, 800273538, 829593966, 5813011840, 5813094619	VT027273-x-VT043925	w[1118]; P{y[+t7.7] w[+mC]=VT027273-p65.AD}attP40; P{y[+t7.7] w[+mC]=VT043925-GAL4.DBD}attP2
SS85535	Adult	Yoshi Aso	Aso	1	N	No	No	10.7554/eLife.94168	Shuai; 2024	3041577	SMP212	702692200, 893338749, 5813058310	GMR_58G11-x-GMR_49A06	w[1118]; P{y[+t7.7] w[+mC]=R58G11-p65.AD}attP40; P{y[+t7.7] w[+mC]=R49A06-GAL4.DBD}attP2
SS85568	Adult	Yoshi Aso	Aso	2	N	No	No	10.7554/eLife.94168	Shuai; 2024	3041581	CL193, CL194	388280200, 418970123, 450005014 388280249, 388280610, 418970095	VT043925-x-GMR_23F02	w[1118]; P{y[+t7.7] w[+mC]=VT043925-p65.AD}attP40; P{y[+t7.7] w[+mC]=R23F02-GAL4.DBD}attP2
SS85572	Adult	Yoshi Aso	Aso	2	N	No	No	10.7554/eLife.94168	Shuai; 2024	3041583	LHMB1	5813020988	VT020713-x-GMR_32B12	w[1118]; P{y[+t7.7] w[+mC]=VT020713-p65.AD}attP40; P{y[+t7.7] w[+mC]=R32B12-GAL4.DBD}attP2
SS86025	Adult	Yoshi Aso	Aso	1	N	No	Yes	10.7554/eLife.94168	Shuai; 2024	3041419	VL1_vPN	757556799	VT040712-x-VT012760	w[1118]; P{y[+t7.7] w[+mC]=VT040712-p65.AD}attP40; P{y[+t7.7] w[+mC]=VT012760-GAL4.DBD}attP2
SS87416	Adult	Yoshi Aso	Aso	2	N	No	No	10.7554/eLife.94168	Shuai; 2024	3041556	SLP457	326119769, 792692885	GMR_54G09-x-VT012410	w[1118]; P{y[+t7.7] w[+mC]=R54G09-p65.AD}attP40; P{y[+t7.7] w[+mC]=VT012410-GAL4.DBD}attP2
SS88901	Adult	Yoshi Aso	Aso	1	N	No	No	10.7554/eLife.94168	Shuai; 2024	3042192	LHPV6q1	787563949, 5813047683	VT023793-x-VT024643	w[1118]; P{y[+t7.7] w[+mC]=VT023793-p65.AD}attP40; P{y[+t7.7] w[+mC]=VT024643-GAL4.DBD}attP2
SS88938	Adult	Yoshi Aso	Aso	1	N	No	No	10.7554/eLife.94168	Shuai; 2024	3042194			VT064563-x-VT033285	w[1118]; P{y[+t7.7] w[+mC]=VT064563-p65.AD}attP40; P{y[+t7.7] w[+mC]=VT033285-GAL4.DBD}attP2
SS89005	Adult	Yoshi Aso	Aso	1	N	No	No	10.7554/eLife.94168	Shuai; 2024	3042200			VT013612-x-GMR_24C08	w[1118]; P{y[+t7.7] w[+mC]=VT013612-p65.AD}attP40; P{y[+t7.7] w[+mC]=R24C08-GAL4.DBD}attP2
SS02082	Adult	Aljoscha Nern	Rubin	1	N	No	No	10.1101/2023.10.16.562634	Zhao; 2023	3017712	MeVPLp2		VT043284-x-VT000926	w[1118]; P{y[+t7.7] w[+mC]=VT043284-p65.AD}attP40; P{y[+t7.7] w[+mC]=VT000926-GAL4.DBD}attP2
SS53141	Adult	Aljoscha Nern	Rubin	1	N	No	No	10.1101/2023.10.16.562634	Zhao; 2023	3030075	LPi2b		GMR_91C05-x-VT049130	w[1118]; P{y[+t7.7] w[+mC]=R91C05-p65.AD}attP40/CyO, P{w[+mC]=2xTb[1]-RFP}CyO; P{y[+t7.7] w[+mC]=VT049130-GAL4.DBD}attP2/TM6B, Tb[1]
SS00336	Adult	Aljoscha Nern	Rubin	2	N	No	No	10.1101/2023.11.29.569241	Garner, Kind; 2023	2502543	MeTu2a		GMR_91C12-x-GMR_65H03	w[1118]; P{y[+t7.7] w[+mC]=R91C12-p65.AD}attP40; P{y[+t7.7] w[+mC]=R65H03-GAL4.DBD}attP2
SS00385	Adult	Aljoscha Nern	Rubin	1	N	No	No	10.1101/2023.11.29.569241	Garner, Kind; 2023	3000774	MeTu1		GMR_84F07-x-GMR_70E04	w[1118]; P{y[+t7.7] w[+mC]=R84F07-p65.AD}attP40; P{y[+t7.7] w[+mC]=R70E04-GAL4.DBD}attP2
SS03719	Adult	Aljoscha Nern	Rubin	1	N	No	No	10.1101/2023.11.29.569241	Garner, Kind; 2023	3020242	MeTu4		VT025797-x-VT008678	w[1118]; P{y[+t7.7] w[+mC]=VT025797-p65.AD}attP40; P{y[+t7.7] w[+mC]=VT008678-GAL4.DBD}attP2
SS03744	Adult	Aljoscha Nern	Rubin	2	N	No	No	10.1101/2023.11.29.569241	Garner, Kind; 2023	3020267	MeTu2b		VT016285-x-VT059699	w[1118]; P{y[+t7.7] w[+mC]=VT016285-p65.AD}attP40; P{y[+t7.7] w[+mC]=VT059699-GAL4.DBD}attP2
SS23880	Adult	Aljoscha Nern	Rubin	1	N	No	Yes	10.1101/2023.11.29.569241	Garner, Kind; 2023	3023731	MeTu4d		VT014974-x-GMR_68A08	w[1118]; P{y[+t7.7] w[+mC]=VT014974-p65.AD}attP40/CyO, P{w[+mC]=2xTb[1]-RFP}CyO; P{y[+t7.7] w[+mC]=R68A08-GAL4.DBD}attP2
SS00029	Adult	Tanya Wolff	Rubin	3	0	No	No	10.1101/2024.01.09.574419	Meissner; 2024	2502194			GMR_38G07-x-GMR_15D05	w[1118]; P{y[+t7.7] w[+mC]=R38G07-p65.AD}attP40/CyO; P{y[+t7.7] w[+mC]=R15D05-GAL4.DBD}attP2
SS01475	Adult	Kaiyu Wang	Dickson	2	N	No	No	10.1101/2024.01.09.574419	Meissner; 2024	3016674			VT029591-x-VT040973	w[1118]; P{y[+t7.7] w[+mC]=VT029591-p65.AD}attP40; P{y[+t7.7] w[+mC]=VT040973-GAL4.DBD}attP2
SS01506	Adult	Kaiyu Wang	Dickson	1	N	No	No	10.1101/2024.01.09.574419	Meissner; 2024	3016805			VT038210-x-VT026992	w[1118]; P{y[+t7.7] w[+mC]=VT038210-p65.AD}attP40/CyO, P{w[+mC]=2xTb[1]-RFP}CyO; P{y[+t7.7] w[+mC]=VT026992-GAL4.DBD}attP2/TM6B, Tb[1]
SS01516	Adult	Kaiyu Wang	Dickson	1	Y	No	Yes	10.1101/2024.01.09.574419	Meissner; 2024	3016815			VT050239-x-VT028277	w[1118]; P{y[+t7.7] w[+mC]=VT050239-p65.AD}attP40; P{y[+t7.7] w[+mC]=VT028277-GAL4.DBD}attP2
SS01539	Adult	Barry Dickson	Dickson	1	Y	No	No	10.1101/2024.01.09.574419	Meissner; 2024	3016838			GMR_71G01-x-VT054805	w[1118]; P{y[+t7.7] w[+mC]=R71G01-p65.AD}attP40; P{y[+t7.7] w[+mC]=VT054805-GAL4.DBD}attP2
SS02050	Adult	Aljoscha Nern	Rubin	2	N	No	No	10.1101/2024.01.09.574419	Meissner; 2024	3017419	PVLP085/086 or similar		GMR_21C01-x-GMR_70B08	w[1118]; P{y[+t7.7] w[+mC]=R21C01-p65.AD}attP40/CyO, P{w[+mC]=2xTb[1]-RFP}CyO; P{y[+t7.7] w[+mC]=R70B08-GAL4.DBD}attP2
SS02057	Adult	Aljoscha Nern	Rubin	1	N	No	No	10.1101/2024.01.09.574419	Meissner; 2024	3017426	PVLP037 or similar		GMR_21B12-x-GMR_17H01	w[1118]; P{y[+t7.7] w[+mC]=R21B12-p65.AD}attP40; P{y[+t7.7] w[+mC]=R17H01-GAL4.DBD}attP2
SS02058	Adult	Aljoscha Nern	Rubin	1	N	No	Yes	10.1101/2024.01.09.574419	Meissner; 2024	3017427	PLP036		GMR_21B12-x-GMR_27E07	w[1118]; P{y[+t7.7] w[+mC]=R21B12-p65.AD}attP40; P{y[+t7.7] w[+mC]=R27E07-GAL4.DBD}attP2
SS02072	Adult	Aljoscha Nern	Rubin	1	N	No	No	10.1101/2024.01.09.574419	Meissner; 2024	3017441	PVLP007 (LC16g1)		GMR_18C12-x-VT013605	w[1118]; P{y[+t7.7] w[+mC]=R18C12-p65.AD}attP40/CyO, P{w[+mC]=2xTb[1]-RFP}CyO; P{y[+t7.7] w[+mC]=VT013605-GAL4.DBD}attP2
SS02347	Adult	Aljoscha Nern	Rubin	1	N	No	Yes	10.1101/2024.01.09.574419	Meissner; 2024	3018249	PVLP007 (LC16g1)		VT046799-x-GMR_18C12	w[1118]; P{y[+t7.7] w[+mC]=VT046799-p65.AD}attP40; P{y[+t7.7] w[+mC]=R18C12-GAL4.DBD}attP2
SS02512	Adult	Barry Dickson	Dickson	2	N	No	No	10.1101/2024.01.09.574419	Meissner; 2024	3018490			VT040012-x-GMR_35D04	w[1118]; P{y[+t7.7] w[+mC]=VT040012-p65.AD}attP40/CyO, P{w[+mC]=2xTb[1]-RFP}CyO; P{y[+t7.7] w[+mC]=R35D04-GAL4.DBD}attP2
SS02950	Adult	Tanya Wolff	Rubin	2	N	No	No	10.1101/2024.01.09.574419	Meissner; 2024	3019024	vDH+ct		GMR_33C05-x-GMR_72G07	w[1118]; P{y[+t7.7] w[+mC]=R33C05-p65.AD}attP40; P{y[+t7.7] w[+mC]=R72G07-GAL4.DBD}attP2
SS02996	Adult	Barry Dickson	Dickson	1	N	No	No	10.1101/2024.01.09.574419	Meissner; 2024	3019192			VT049125-x-GMR_38B09	w[1118]; P{y[+t7.7] w[+mC]=VT049125-p65.AD}attP40; P{y[+t7.7] w[+mC]=R38B09-GAL4.DBD}attP2
SS03049	Adult	Kaiyu Wang	Dickson	1	N	No	Yes	10.1101/2024.01.09.574419	Meissner; 2024	3019247			VT057053-x-VT026992	w[1118]; P{y[+t7.7] w[+mC]=VT057053-p65.AD}attP40; P{y[+t7.7] w[+mC]=VT026992-GAL4.DBD}attP2
SS03103	Adult	Barry Dickson	Dickson	1	N	No	No	10.1101/2024.01.09.574419	Meissner; 2024	3019301			GMR_31H10-x-VT025718	w[1118]; P{y[+t7.7] w[+mC]=R31H10-p65.AD}attP40; P{y[+t7.7] w[+mC]=VT025718-GAL4.DBD}attP2/TM6B, Tb[1]
SS03112	Adult	Barry Dickson	Dickson	1	N	No	Yes	10.1101/2024.01.09.574419	Meissner; 2024	3019310			GMR_45D07-x-VT027804	w[1118]; P{y[+t7.7] w[+mC]=R45D07-p65.AD}attP40/CyO, P{w[+mC]=2xTb[1]-RFP}CyO; P{y[+t7.7] w[+mC]=VT027804-GAL4.DBD}attP2
SS03283	Adult	Kaiyu Wang	Dickson	1	N	No	No	10.1101/2024.01.09.574419	Meissner; 2024	3019634			VT019018-x-GMR_19F09	w[1118]; P{y[+t7.7] w[+mC]=VT019018-p65.AD}attP40; P{y[+t7.7] w[+mC]=R19F09-GAL4.DBD}attP2
SS03326	Adult	Barry Dickson	Dickson	1	N	No	Yes	10.1101/2024.01.09.574419	Meissner; 2024	3019677			VT059450-x-GMR_47D05	w[1118]; P{y[+t7.7] w[+mC]=VT059450-p65.AD}attP40/CyO, P{w[+mC]=2xTb[1]-RFP}CyO; P{y[+t7.7] w[+mC]=R47D05-GAL4.DBD}attP2
SS03365	Adult	Barry Dickson	Dickson	1	N	No	No	10.1101/2024.01.09.574419	Meissner; 2024	3019716			VT048418-x-GMR_17B02	w[1118]; P{y[+t7.7] w[+mC]=VT048418-p65.AD}attP40/CyO, P{w[+mC]=2xTb[1]-RFP}CyO; P{y[+t7.7] w[+mC]=R17B02-GAL4.DBD}attP2
SS03558	Adult	Barry Dickson	Dickson	1	N	No	No	10.1101/2024.01.09.574419	Meissner; 2024	3020054			VT056375-x-VT025805	w[1118]; P{y[+t7.7] w[+mC]=VT056375-p65.AD}attP40; P{y[+t7.7] w[+mC]=VT025805-GAL4.DBD}attP2/TM6B, Tb[1]
SS03563	Adult	Barry Dickson	Dickson	1	N	No	No	10.1101/2024.01.09.574419	Meissner; 2024	3020059			VT056375-x-VT000767	w[1118]; P{y[+t7.7] w[+mC]=VT056375-p65.AD}attP40; P{y[+t7.7] w[+mC]=VT000767-GAL4.DBD}attP2
SS03573	Adult	Barry Dickson	Dickson	1	N	No	No	10.1101/2024.01.09.574419	Meissner; 2024	3020069			VT044982-x-VT010664	w[1118]; P{y[+t7.7] w[+mC]=VT044982-p65.AD}attP40; P{y[+t7.7] w[+mC]=VT010664-GAL4.DBD}attP2
SS03575	Adult	Barry Dickson	Dickson	1	N	No	No	10.1101/2024.01.09.574419	Meissner; 2024	3020071			VT046081-x-GMR_55C09	w[1118]; P{y[+t7.7] w[+mC]=VT046081-p65.AD}attP40; P{y[+t7.7] w[+mC]=R55C09-GAL4.DBD}attP2
SS03627	Adult	Barry Dickson	Dickson	1	N	No	No	10.1101/2024.01.09.574419	Meissner; 2024	3020123			GMR_94D12-x-GMR_11B07	w[1118]; P{y[+t7.7] w[+mC]=R94D12-p65.AD}attP40/CyO, P{w[+mC]=2xTb[1]-RFP}CyO; P{y[+t7.7] w[+mC]=R11B07-GAL4.DBD}attP2
SS03644	Adult	Aljoscha Nern	Rubin	2	N	No	No	10.1101/2024.01.09.574419	Meissner; 2024	3020140	PLP015		VT008149-x-GMR_22A12	w[1118]; P{y[+t7.7] w[+mC]=VT008149-p65.AD}attP40; P{y[+t7.7] w[+mC]=R22A12-GAL4.DBD}attP2/TM6B, Tb[1]
SS03658	Adult	Aljoscha Nern	Rubin	1	N	No	No	10.1101/2024.01.09.574419	Meissner; 2024	3020154	PLP115		VT027323-x-VT008675	w[1118]; P{y[+t7.7] w[+mC]=VT027323-p65.AD}attP40; P{y[+t7.7] w[+mC]=VT008675-GAL4.DBD}attP2
SS03689	Adult	Aljoscha Nern	Rubin	1	N	No	No	10.1101/2024.01.09.574419	Meissner; 2024	3020212	PVLP098 and/or similar		GMR_22D12-x-GMR_31C03	w[1118]; P{y[+t7.7] w[+mC]=R22D12-p65.AD}attP40; P{y[+t7.7] w[+mC]=R31C03-GAL4.DBD}attP2
SS03704	Adult	Aljoscha Nern	Rubin	2	N	No	No	10.1101/2024.01.09.574419	Meissner; 2024	3020227	LC6g4 (AVLP468)		GMR_72G03-x-GMR_22D12	w[1118]; P{y[+t7.7] w[+mC]=R72G03-p65.AD}attP40; P{y[+t7.7] w[+mC]=R22D12-GAL4.DBD}attP2
SS03737	Adult	Aljoscha Nern	Rubin	2	N	No	No	10.1101/2024.01.09.574419	Meissner; 2024	3020260	PLP115		VT027323-x-GMR_78F07	w[1118]; P{y[+t7.7] w[+mC]=VT027323-p65.AD}attP40; P{y[+t7.7] w[+mC]=R78F07-GAL4.DBD}attP2
SS03765	Adult	Aljoscha Nern	Rubin	1	N	No	No	10.1101/2024.01.09.574419	Meissner; 2024	3020288	PVLP103 or similar		GMR_92A09-x-GMR_82E12	w[1118]; P{y[+t7.7] w[+mC]=R92A09-p65.AD}attP40; P{y[+t7.7] w[+mC]=R82E12-GAL4.DBD}attP2
SS03838	Adult	Aljoscha Nern	Rubin	1	N	No	Yes	10.1101/2024.01.09.574419	Meissner; 2024	3020441	PVLP069		GMR_76E09-x-VT046799	w[1118]; P{y[+t7.7] w[+mC]=R76E09-p65.AD}attP40; P{y[+t7.7] w[+mC]=VT046799-GAL4.DBD}attP2/TM6B, Tb[1]
SS04259	Adult	Gerry Rubin	Rubin	1	N	No	No	10.1101/2024.01.09.574419	Meissner; 2024	3021032	aIPg4		VT043699-x-GMR_28H03	w[1118]; P{y[+t7.7] w[+mC]=VT043699-p65.AD}attP40/CyO, P{w[+mC]=2xTb[1]-RFP}CyO; P{y[+t7.7] w[+mC]=R28H03-GAL4.DBD}attP2/TM6B, Tb[1]
SS04443	Adult	Aljoscha Nern	Rubin	2	N	No	No	10.1101/2024.01.09.574419	Meissner; 2024	3021225	PVLP037 or similar		GMR_17H01-x-GMR_21B12	w[1118]; P{y[+t7.7] w[+mC]=R17H01-p65.AD}attP40/CyO, P{w[+mC]=2xTb[1]-RFP}CyO; P{y[+t7.7] w[+mC]=R21B12-GAL4.DBD}attP2/TM6B, Tb[1]
SS04532	Adult	DI	DI	1	N	No	No	10.1101/2024.01.09.574419	Meissner; 2024	3021407	uLAL-BN		GMR_72H06-x-VT033290	w[1118]; P{y[+t7.7] w[+mC]=R72H06-p65.AD}attP40; P{y[+t7.7] w[+mC]=VT033290-GAL4.DBD}attP2
SS04723	Adult	Jim Truman	Truman	2	N	No	No	10.1101/2024.01.09.574419	Meissner; 2024	3021731	13B		VT046782-x-GMR_30G06	w[1118]; P{y[+t7.7] w[+mC]=VT046782-p65.AD}attP40; P{y[+t7.7] w[+mC]=R30G06-GAL4.DBD}attP2/TM6B, Tb[1]
SS04724	Adult	Jim Truman	Truman	2	N	No	No	10.1101/2024.01.09.574419	Meissner; 2024	3021732	10B		VT050249-x-VT043132	w[1118]; P{y[+t7.7] w[+mC]=VT050249-p65.AD}attP40/CyO; P{y[+t7.7] w[+mC]=VT043132-GAL4.DBD}attP2
SS04726	Adult	Jim Truman	Truman	2	N	No	No	10.1101/2024.01.09.574419	Meissner; 2024	3021734	12B		VT044519-x-VT040346	w[1118]; P{y[+t7.7] w[+mC]=VT044519-p65.AD}attP40; P{y[+t7.7] w[+mC]=VT040346-GAL4.DBD}attP2/TM6B, Tb[1]
SS04728	Adult	Jim Truman	Truman	2	N	No	No	10.1101/2024.01.09.574419	Meissner; 2024	3021736	12B		VT040346-x-VT050658	w[1118]; P{y[+t7.7] w[+mC]=VT040346-p65.AD}attP40; P{y[+t7.7] w[+mC]=VT050658-GAL4.DBD}attP2
SS04730	Adult	Jim Truman	Truman	1	N	Yes	No	10.1101/2024.01.09.574419	Meissner; 2024	3021738	01A		VT058873-x-GMR_73A06	w[1118]; P{y[+t7.7] w[+mC]=VT058873-p65.AD}attP40; P{y[+t7.7] w[+mC]=R73A06-GAL4.DBD}attP2
SS04732	Adult	Jim Truman	Truman	2	N	No	No	10.1101/2024.01.09.574419	Meissner; 2024	3021740	14A		VT064489-x-VT049923	w[1118]; P{y[+t7.7] w[+mC]=VT064489-p65.AD}attP40/CyO, P{w[+mC]=2xTb[1]-RFP}CyO; P{y[+t7.7] w[+mC]=VT049923-GAL4.DBD}attP2
SS04733	Adult	Jim Truman	Truman	2	N	No	No	10.1101/2024.01.09.574419	Meissner; 2024	3021741	14A		VT064489-x-GMR_23C06	w[1118]; P{y[+t7.7] w[+mC]=VT064489-p65.AD}attP40/CyO, P{w[+mC]=2xTb[1]-RFP}CyO; P{y[+t7.7] w[+mC]=R23C06-GAL4.DBD}attP2/TM6B, Tb[1]
SS04736	Adult	Jim Truman	Truman	2	N	No	No	10.1101/2024.01.09.574419	Meissner; 2024	3021744	01B		VT044946-x-GMR_30A10	w[1118]; P{y[+t7.7] w[+mC]=VT044946-p65.AD}attP40; P{y[+t7.7] w[+mC]=R30A10-GAL4.DBD}attP2
SS04738	Adult	Jim Truman	Truman	2	N	No	No	10.1101/2024.01.09.574419	Meissner; 2024	3021746	12B		VT019339-x-VT050658	w[1118]; P{y[+t7.7] w[+mC]=VT019339-p65.AD}attP40; P{y[+t7.7] w[+mC]=VT050658-GAL4.DBD}attP2
SS04739	Adult	Jim Truman	Truman	1	N	No	No	10.1101/2024.01.09.574419	Meissner; 2024	3021747	14A		GMR_34F03-x-VT049923	w[1118]; P{y[+t7.7] w[+mC]=R34F03-p65.AD}attP40; P{y[+t7.7] w[+mC]=VT049923-GAL4.DBD}attP2
SS04741	Adult	Jim Truman	Truman	2	N	No	No	10.1101/2024.01.09.574419	Meissner; 2024	3021749	01A		GMR_54D12-x-GMR_73A06	w[1118]; P{y[+t7.7] w[+mC]=R54D12-p65.AD}attP40; P{y[+t7.7] w[+mC]=R73A06-GAL4.DBD}attP2
SS04742	Adult	Jim Truman	Truman	1	N	Yes	No	10.1101/2024.01.09.574419	Meissner; 2024	3021750	01A		GMR_73B05-x-VT058873	w[1118]; P{y[+t7.7] w[+mC]=R73B05-p65.AD}attP40; P{y[+t7.7] w[+mC]=VT058873-GAL4.DBD}attP2
SS04744	Adult	Jim Truman	Truman	1	N	Yes	No	10.1101/2024.01.09.574419	Meissner; 2024	3021752	01A		GMR_77B09-x-GMR_73A06	w[1118]; P{y[+t7.7] w[+mC]=R77B09-p65.AD}attP40; P{y[+t7.7] w[+mC]=R73A06-GAL4.DBD}attP2
SS04745	Adult	Jim Truman	Truman	2	N	No	No	10.1101/2024.01.09.574419	Meissner; 2024	3021753	23B		GMR_77C10-x-VT050226	w[1118]; P{y[+t7.7] w[+mC]=R77C10-p65.AD}attP40; P{y[+t7.7] w[+mC]=VT050226-GAL4.DBD}attP2
SS04746	Adult	Jim Truman	Truman	1	N	Yes	No	10.1101/2024.01.09.574419	Meissner; 2024	3021754	23B		GMR_77C10-x-VT026010	w[1118]; P{y[+t7.7] w[+mC]=R77C10-p65.AD}attP40; P{y[+t7.7] w[+mC]=VT026010-GAL4.DBD}attP2
SS04747	Adult	Jim Truman	Truman	2	N	No	No	10.1101/2024.01.09.574419	Meissner; 2024	3021755	23B		GMR_77C10-x-VT026655	w[1118]; P{y[+t7.7] w[+mC]=R77C10-p65.AD}attP40; P{y[+t7.7] w[+mC]=VT026655-GAL4.DBD}attP2
SS04748	Adult	Jim Truman	Truman	2	N	No	No	10.1101/2024.01.09.574419	Meissner; 2024	3021756	23B		GMR_77C10-x-GMR_59C10	w[1118]; P{y[+t7.7] w[+mC]=R77C10-p65.AD}attP40; P{y[+t7.7] w[+mC]=R59C10-GAL4.DBD}attP2
SS04749	Adult	Jim Truman	Truman	2	Y	No	No	10.1101/2024.01.09.574419	Meissner; 2024	3021757	23B		GMR_87C08-x-VT026655	w[1118]; P{y[+t7.7] w[+mC]=R87C08-p65.AD}attP40; P{y[+t7.7] w[+mC]=VT026655-GAL4.DBD}attP2
SS04750	Adult	Jim Truman	Truman	1	N	Yes	No	10.1101/2024.01.09.574419	Meissner; 2024	3021758	23B		GMR_87C08-x-GMR_77C10	w[1118]; P{y[+t7.7] w[+mC]=R87C08-p65.AD}attP40; P{y[+t7.7] w[+mC]=R77C10-GAL4.DBD}attP2
SS04751	Adult	Jim Truman	Truman	2	N	No	No	10.1101/2024.01.09.574419	Meissner; 2024	3021759	10B		VT045623-x-VT043132	w[1118]; P{y[+t7.7] w[+mC]=VT045623-p65.AD}attP40; P{y[+t7.7] w[+mC]=VT043132-GAL4.DBD}attP2
SS05018	Adult	Aljoscha Nern	Rubin	1	N	No	Yes	10.1101/2024.01.09.574419	Meissner; 2024	3022077	PVLP/PLP TBD		VT050300-x-VT014013	w[1118]; P{y[+t7.7] w[+mC]=VT050300-p65.AD}attP40; P{y[+t7.7] w[+mC]=VT014013-GAL4.DBD}attP2
SS05024	Adult	Aljoscha Nern	Rubin	2	N	No	Yes	10.1101/2024.01.09.574419	Meissner; 2024	3022083	PLP015		GMR_22A12-x-GMR_93B11	w[1118]; P{y[+t7.7] w[+mC]=R22A12-p65.AD}attP40; P{y[+t7.7] w[+mC]=R93B11-GAL4.DBD}attP2
SS05077	Adult	Jens Goldammer	Rubin	1	N	No	Yes	10.1101/2024.01.09.574419	Meissner; 2024	3039008	WED136, maybe SAD087		GMR_93D09-x-GMR_92H05	w; 93D09-p65ADZp in attP40; 92H05-ZpGdbd in attP2
SS05108	Adult	DI	DI	2	N	No	No	10.1101/2024.01.09.574419	Meissner; 2024	3023053	DNg03x~5		VT039465-x-VT043924	w[1118]; P{y[+t7.7] w[+mC]=VT039465-p65.AD}attP40/CyO, P{w[+mC]=2xTb[1]-RFP}CyO; P{y[+t7.7] w[+mC]=VT043924-GAL4.DBD}attP2
SS11141	Adult	Kaiyu Wang	Dickson	1	Y	No	No	10.1101/2024.01.09.574419	Meissner; 2024	3027853			VT048418-x-VT020610	w[1118]; P{y[+t7.7] w[+mC]=VT048418-p65.AD}attP40/CyO; P{y[+t7.7] w[+mC]=VT020610-GAL4.DBD}attP2/TM6B, Tb[1]
SS12653	Adult	DI	DI	2	N	No	No	10.1101/2024.01.09.574419	Meissner; 2024	3041707	DNp15, DNp19		GMR_26E02-x-VT048635	w[1118]; P{y[+t7.7] w[+mC]=R26E02-p65.AD}attP40/CyO, P{2xTb[1]-RFP}CyO; P{y[+t7.7] w[+mC]=VT048635-GAL4.DBD}attP2
SS13337	Adult	DI	DI	2	N	No	No	10.1101/2024.01.09.574419	Meissner; 2024	3037651	DNg95		GMR_56H08-x-VT027273	w[1118]; P{y[+t7.7] w[+mC]=R56H08-p65.AD}attP40/CyO, P{w[+mC]=2xTb[1]-RFP}CyO; P{y[+t7.7] w[+mC]=VT027273-GAL4.DBD}attP2
SS14728	Adult	Jim Truman	Truman	1	N	No	No	10.1101/2024.01.09.574419	Meissner; 2024	3022870	07B		VT044958-x-VT050273	w[1118]; P{y[+t7.7] w[+mC]=VT044958-p65.AD}attP40; P{y[+t7.7] w[+mC]=VT050273-GAL4.DBD}attP2
SS15829	Adult	Jens Goldammer	Rubin	1	N	No	No	10.1101/2024.01.09.574419	Meissner; 2024	3039032	unknown GNG type 5: 5812999840?, 2055976080?, 1993914947?, 5813077999?, 1870474876?, 5813060278?, 5813078093?		GMR_18A05-x-VT024641	w[1118]; P{y[+t7.7] w[+mC]=R18A05-p65.AD}attP40/CyO; P{y[+t7.7] w[+mC]=VT024641-GAL4.DBD}attP2/TM6, Tb[1]
SS17563	Adult	Aljoscha Nern	Rubin	2	N	No	No	10.1101/2024.01.09.574419	Meissner; 2024	3022184	PLP016		GMR_22A12-x-GMR_65H10	w[1118]; P{y[+t7.7] w[+mC]=R22A12-p65.AD}attP40; P{y[+t7.7] w[+mC]=R65H10-GAL4.DBD}attP2
SS17567	Adult	Aljoscha Nern	Rubin	2	N	No	No	10.1101/2024.01.09.574419	Meissner; 2024	3022189			GMR_22D12-x-GMR_44H01	w[1118]; P{y[+t7.7] w[+mC]=R22D12-p65.AD}attP40; P{y[+t7.7] w[+mC]=R44H01-GAL4.DBD}attP2/TM6B, Tb[1]
SS17568	Adult	Aljoscha Nern	Rubin	1	N	No	Yes	10.1101/2024.01.09.574419	Meissner; 2024	3022190	LC6g4 (AVLP468), faint VPN		GMR_22D12-x-GMR_55C09	w[1118]; P{y[+t7.7] w[+mC]=R22D12-p65.AD}attP40; P{y[+t7.7] w[+mC]=R55C09-GAL4.DBD}attP2
SS17676	Adult	Aljoscha Nern	Rubin	1	N	No	No	10.1101/2024.01.09.574419	Meissner; 2024	3022217	PVLP099 or similar		GMR_42B05-x-GMR_22D12	w; 42B05-p65ADZp in attP40; 22D12-ZpGdbd in attP2/TM6B
SS17768	Adult	Aljoscha Nern	Rubin	1	N	No	No	10.1101/2024.01.09.574419	Meissner; 2024	3022212	PVLP112/113		GMR_72A10-x-VT002042	w[1118]; P{y[+t7.7] w[+mC]=R72A10-p65.AD}attP40; P{y[+t7.7] w[+mC]=VT002042-GAL4.DBD}attP2
SS17786	Adult	Aljoscha Nern	Rubin	1	N	No	Yes	10.1101/2024.01.09.574419	Meissner; 2024	3022202	PVLP069		GMR_76E07-x-VT046799	w[1118]; P{y[+t7.7] w[+mC]=R76E07-p65.AD}attP40; P{y[+t7.7] w[+mC]=VT046799-GAL4.DBD}attP2/TM6B, Tb[1]
SS18018	Adult	Aljoscha Nern	Rubin	1	N	No	No	10.1101/2024.01.09.574419	Meissner; 2024	3022831	PLP219		GMR_81D05-x-VT041832	w[1118]; P{y[+t7.7] w[+mC]=VT041832-GAL4.DBD}attP2 PBac{y[+mDint2] w[+mC]=R81D05-p65.AD}VK00027
SS20257	Adult	Jim Truman	Truman	2	N	No	No	10.1101/2024.01.09.574419	Meissner; 2024	3022888	09A		VT014013-x-GMR_30A10	w[1118]; P{y[+t7.7] w[+mC]=VT014013-p65.AD}attP40/CyO, P{2xTb[1]-RFP}CyO; P{y[+t7.7] w[+mC]=R30A10-GAL4.DBD}attP2
SS20268	Adult	Jim Truman	Truman	1	N	Yes	No	10.1101/2024.01.09.574419	Meissner; 2024	3024006	09A		VT064562-x-VT044946	w[1118]; P{y[+t7.7] w[+mC]=VT064562-p65.AD}attP40; P{y[+t7.7] w[+mC]=VT044946-GAL4.DBD}attP2
SS20301	Adult	Jim Truman	Truman	2	N	No	No	10.1101/2024.01.09.574419	Meissner; 2024	3022902	01A		GMR_73B05-x-VT000629	w[1118]; P{y[+t7.7] w[+mC]=R73B05-p65.AD}attP40; P{y[+t7.7] w[+mC]=VT000629-GAL4.DBD}attP2
SS20733	Adult	Jim Truman	Truman	2	N	No	No	10.1101/2024.01.09.574419	Meissner; 2024	3022885	19A		VT040542-x-GMR_34H05	w[1118]; P{y[+t7.7] w[+mC]=VT040542-p65.AD}attP40/CyO, P{w[+mC]=2xTb[1]-RFP}CyO; P{y[+t7.7] w[+mC]=R34H05-GAL4.DBD}attP2/TM6B, Tb[1]
SS20738	Adult	Jim Truman	Truman	1	N	Yes	No	10.1101/2024.01.09.574419	Meissner; 2024	3022874	19A		VT044964-x-VT044494	w[1118]; P{y[+t7.7] w[+mC]=VT044964-p65.AD}attP40; P{y[+t7.7] w[+mC]=VT044494-GAL4.DBD}attP2
SS20743	Adult	Jim Truman	Truman	1	N	No	No	10.1101/2024.01.09.574419	Meissner; 2024	3022875	19A		VT044964-x-GMR_34H05	w[1118]; P{y[+t7.7] w[+mC]=VT044964-p65.AD}attP40/CyO, P{w[+mC]=2xTb[1]-RFP}CyO; P{y[+t7.7] w[+mC]=R34H05-GAL4.DBD}attP2/TM6B, Tb[1]
SS20745	Adult	Ryo Minegishi	Dickson	1	N	No	No	10.1101/2024.01.09.574419	Meissner; 2024	3028840	LUL89, LUL97		VT044964-x-VT046303	w[1118]; P{y[+t7.7] w[+mC]=VT044964-p65.AD}attP40; P{y[+t7.7] w[+mC]=VT046303-GAL4.DBD}attP2
SS20748	Adult	Jim Truman	Truman	1	N	Yes	No	10.1101/2024.01.09.574419	Meissner; 2024	3022896	19B		GMR_29F08-x-GMR_39H01	w[1118]; P{y[+t7.7] w[+mC]=R29F08-p65.AD}attP40; P{y[+t7.7] w[+mC]=R39H01-GAL4.DBD}attP2
SS20751	Adult	Jim Truman	Truman	1	N	Yes	No	10.1101/2024.01.09.574419	Meissner; 2024	3022898	19A		GMR_32E04-x-GMR_64H06	w[1118]; P{y[+t7.7] w[+mC]=R32E04-p65.AD}attP40; P{y[+t7.7] w[+mC]=R64H06-GAL4.DBD}attP2
SS20752	Adult	Jim Truman	Truman	2	N	No	No	10.1101/2024.01.09.574419	Meissner; 2024	3022876	19A		VT006555-x-GMR_64H06	w; VT006555-p65ADZp in attP40; 64H06-ZpGDBD in attP2
SS20754	Adult	Jim Truman	Truman	2	N	No	No	10.1101/2024.01.09.574419	Meissner; 2024	3022882	19B		VT060731-x-GMR_39H01	w[1118]; P{y[+t7.7] w[+mC]=VT060731-p65.AD}attP40; P{y[+t7.7] w[+mC]=R39H01-GAL4.DBD}attP2
SS20765	Adult	Jim Truman	Truman	1	N	No	No	10.1101/2024.01.09.574419	Meissner; 2024	3022892	05B		GMR_26C06-x-VT016966	w[1118]; P{y[+t7.7] w[+mC]=R26C06-p65.AD}attP40; P{y[+t7.7] w[+mC]=VT016966-GAL4.DBD}attP2
SS20767	Adult	Jim Truman	Truman	2	N	No	No	10.1101/2024.01.09.574419	Meissner; 2024	3022895	19B		GMR_29F08-x-VT063983	w[1118]; P{y[+t7.7] w[+mC]=R29F08-p65.AD}attP40; P{y[+t7.7] w[+mC]=VT063983-GAL4.DBD}attP2
SS20768	Adult	Jim Truman	Truman	2	N	No	No	10.1101/2024.01.09.574419	Meissner; 2024	3022897	07B		GMR_32E04-x-VT006555	w[1118]; P{y[+t7.7] w[+mC]=R32E04-p65.AD}attP40; P{y[+t7.7] w[+mC]=VT006555-GAL4.DBD}attP2/TM6B, Tb[1]
SS20769	Adult	Jim Truman	Truman	1	N	Yes	No	10.1101/2024.01.09.574419	Meissner; 2024	3022880	19B		VT060731-x-VT063983	w[1118]; P{y[+t7.7] w[+mC]=VT060731-p65.AD}attP40; P{y[+t7.7] w[+mC]=VT063983-GAL4.DBD}attP2
SS20770	Adult	Jim Truman	Truman	2	N	No	No	10.1101/2024.01.09.574419	Meissner; 2024	3022887	05B		VT004320-x-VT016966	w; VT004320-p65ADZp in attP40; VT016966-ZpGDBD in attP2
SS20774	Adult	Jim Truman	Truman	2	N	No	No	10.1101/2024.01.09.574419	Meissner; 2024	3022889	06A		VT014709-x-VT004417	w[1118]; P{y[+t7.7] w[+mC]=VT014709-p65.AD}attP40; P{y[+t7.7] w[+mC]=VT004417-GAL4.DBD}attP2
SS20790	Adult	Jim Truman	Truman	2	N	No	No	10.1101/2024.01.09.574419	Meissner; 2024	3027656	08B		GMR_75F06-x-VT047325	w[1118]; P{y[+t7.7] w[+mC]=R75F06-p65.AD}attP40; P{y[+t7.7] w[+mC]=VT047325-GAL4.DBD}attP2/TM6B, Tb[1]
SS20791	Adult	Jim Truman	Truman	1	N	No	No	10.1101/2024.01.09.574419	Meissner; 2024	3022903	08B		GMR_75F06-x-VT058856	w[1118]; P{y[+t7.7] w[+mC]=R75F06-p65.AD}attP40; P{y[+t7.7] w[+mC]=VT058856-GAL4.DBD}attP2
SS20797	Adult	Jim Truman	Truman	1	N	Yes	No	10.1101/2024.01.09.574419	Meissner; 2024	3022908	06A		GMR_80C08-x-VT044982	w[1118]; P{y[+t7.7] w[+mC]=R80C08-p65.AD}attP40; P{y[+t7.7] w[+mC]=VT044982-GAL4.DBD}attP2
SS20806	Adult	Jim Truman	Truman	1	N	No	No	10.1101/2024.01.09.574419	Meissner; 2024	3022871	07B		VT044958-x-VT026140	w; VT044958-p65ADZp in attP40; VT026140-ZpGdbd in attP2
SS20807	Adult	Jim Truman	Truman	1	N	No	No	10.1101/2024.01.09.574419	Meissner; 2024	3022872	07B		VT044958-x-VT027704	w[1118]; P{y[+t7.7] w[+mC]=VT044958-p65.AD}attP40; P{y[+t7.7] w[+mC]=VT027704-GAL4.DBD}attP2
SS20810	Adult	Jim Truman	Truman	2	N	No	No	10.1101/2024.01.09.574419	Meissner; 2024	3024206	07B		VT049923-x-VT020833	w[1118]; P{y[+t7.7] w[+mC]=VT049923-p65.AD}attP40; P{y[+t7.7] w[+mC]=VT020833-GAL4.DBD}attP2
SS20818	Adult	Jim Truman	Truman	1	N	No	No	10.1101/2024.01.09.574419	Meissner; 2024	3022879	10B		VT050249-x-VT043613	w[1118]; P{y[+t7.7] w[+mC]=VT050249-p65.AD}attP40/CyO, P{2xTb[1]-RFP}CyO; P{y[+t7.7] w[+mC]=VT043613-GAL4.DBD}attP2/TM6B, Tb[1]
SS20826	Adult	Jim Truman	Truman	2	N	No	No	10.1101/2024.01.09.574419	Meissner; 2024	3022884	07B		VT029740-x-VT026140	w[1118]; P{y[+t7.7] w[+mC]=VT029740-p65.AD}attP40; P{y[+t7.7] w[+mC]=VT026140-GAL4.DBD}attP2
SS20829	Adult	Jim Truman	Truman	2	N	No	No	10.1101/2024.01.09.574419	Meissner; 2024	3024204	12A		VT025598-x-VT019307	w[1118]; P{y[+t7.7] w[+mC]=VT025598-p65.AD}attP40; P{y[+t7.7] w[+mC]=VT019307-GAL4.DBD}attP2
SS20830	Adult	Jim Truman	Truman	2	N	No	No	10.1101/2024.01.09.574419	Meissner; 2024	3022890	02A		VT025598-x-VT042767	w[1118]; P{y[+t7.7] w[+mC]=VT025598-p65.AD}attP40/CyO, P{2xTb[1]-RFP}CyO; P{y[+t7.7] w[+mC]=VT042767-GAL4.DBD}attP2/TM6B, Tb[1]
SS20834	Adult	Jim Truman	Truman	2	N	No	No	10.1101/2024.01.09.574419	Meissner; 2024	3024203	12A		GMR_22H01-x-GMR_22E06	w[1118]; P{y[+t7.7] w[+mC]=R22H01-p65.AD}attP40; P{y[+t7.7] w[+mC]=R22E06-GAL4.DBD}attP2
SS20846	Adult	Jim Truman	Truman	1	N	Yes	No	10.1101/2024.01.09.574419	Meissner; 2024	3022891	06B		GMR_26B04-x-VT058566	w[1118]; P{y[+t7.7] w[+mC]=R26B04-p65.AD}attP40; P{y[+t7.7] w[+mC]=VT058566-GAL4.DBD}attP2
SS20847	Adult	Jim Truman	Truman	2	N	No	No	10.1101/2024.01.09.574419	Meissner; 2024	3022893	14A		GMR_28A12-x-VT000606	w[1118]; P{y[+t7.7] w[+mC]=R28A12-p65.AD}attP40; P{y[+t7.7] w[+mC]=VT000606-GAL4.DBD}attP2/TM6B, Tb[1]
SS20849	Adult	Jim Truman	Truman	1	N	No	No	10.1101/2024.01.09.574419	Meissner; 2024	3022899	07B		GMR_34H12-x-VT019307	w[1118]; P{y[+t7.7] w[+mC]=R34H12-p65.AD}attP40; P{y[+t7.7] w[+mC]=VT019307-GAL4.DBD}attP2
SS20856	Adult	Jim Truman	Truman	2	N	No	No	10.1101/2024.01.09.574419	Meissner; 2024	3022883	07B		VT019307-x-VT049727	w[1118]; P{y[+t7.7] w[+mC]=VT019307-p65.AD}attP40; P{y[+t7.7] w[+mC]=VT049727-GAL4.DBD}attP2
SS20857	Adult	Jim Truman	Truman	2	N	No	No	10.1101/2024.01.09.574419	Meissner; 2024	3024201	13B		VT032228-x-VT042478	w[1118]; P{y[+t7.7] w[+mC]=VT032228-p65.AD}attP40; P{y[+t7.7] w[+mC]=VT042478-GAL4.DBD}attP2
SS21089	Adult	Jens Goldammer	Rubin	1	N	No	Yes	10.1101/2024.01.09.574419	Meissner; 2024	3023860	ATL031 and ATL032?, IB065 weak		VT036271-x-GMR_26C12	w[1118]; P{y[+t7.7] w[+mC]=VT036271-p65.AD}attP40; P{y[+t7.7] w[+mC]=R26C12-GAL4.DBD}attP2
SS21292	Adult	Aljoscha Nern	Rubin	2	N	No	No	10.1101/2024.01.09.574419	Meissner; 2024	3022823	PVLP TBD		GMR_22A02-x-VT050300	w[1118]; P{y[+t7.7] w[+mC]=R22A02-p65.AD}attP40; P{y[+t7.7] w[+mC]=VT050300-GAL4.DBD}attP2
SS21346	Adult	Barry Dickson	Dickson	1	N	No	No	10.1101/2024.01.09.574419	Meissner; 2024	3022550			VT043068-x-VT054805	w[1118]; P{y[+t7.7] w[+mC]=VT043068-p65.AD}attP40; P{y[+t7.7] w[+mC]=VT054805-GAL4.DBD}attP2
SS21348	Adult	Kaiyu Wang	Dickson	2	N	No	No	10.1101/2024.01.09.574419	Meissner; 2024	3022552			GMR_22D03-x-VT054805	w[1118]; P{y[+t7.7] w[+mC]=R22D03-p65.AD}attP40; P{y[+t7.7] w[+mC]=VT054805-GAL4.DBD}attP2
SS21359	Adult	Jens Goldammer	Rubin	1	N	No	No	10.1101/2024.01.09.574419	Meissner; 2024	3023887	LAL146-LAL151		GMR_37H01-x-GMR_85A07	w[1118]; P{y[+t7.7] w[+mC]=R37H01-p65.AD}attP40/CyO, P{2xTb[1]-RFP}CyO; P{y[+t7.7] w[+mC]=R85A07-GAL4.DBD}attP2
SS21644	Adult	Aljoscha Nern	Rubin	2	N	No	No	10.1101/2024.01.09.574419	Meissner; 2024	3023136	PVLP022/3/4 and/or similar		GMR_91C05-x-GMR_83H07	w[1118]; P{y[+t7.7] w[+mC]=R91C05-p65.AD}attP40/CyO, P{w[+mC]=2xTb[1]-RFP}CyO; P{y[+t7.7] w[+mC]=R83H07-GAL4.DBD}attP2
SS21679	Adult	Jens Goldammer	Rubin	2	N	No	No	10.1101/2024.01.09.574419	Meissner; 2024	3023879	PS052		GMR_25G10-x-VT000254	w[1118]; P{y[+t7.7] w[+mC]=R25G10-p65.AD}attP40/CyO, P{w[+mC]=2xTb[1]-RFP}CyO; P{y[+t7.7] w[+mC]=VT000254-GAL4.DBD}attP2
SS21696	Adult	Kaiyu Wang	Dickson	1	N	No	No	10.1101/2024.01.09.574419	Meissner; 2024	3025012			VT044842-x-VT007396	w[1118]; P{y[+t7.7] w[+mC]=VT044842-p65.AD}attP40; P{y[+t7.7] w[+mC]=VT007396-GAL4.DBD}attP2
SS21963	Adult	Jens Goldammer	Rubin	1	N	No	Yes	10.1101/2024.01.09.574419	Meissner; 2024	3023869	OCG04		VT002026-x-VT000877	w[1118]; P{y[+t7.7] w[+mC]=VT002026-p65.AD}attP40; P{y[+t7.7] w[+mC]=VT000877-GAL4.DBD}attP2
SS21976	Adult	Jens Goldammer	Rubin	1	N	No	Yes	10.1101/2024.01.09.574419	Meissner; 2024	3023907	OCG09		GMR_84E05-x-VT005106	w[1118]; P{y[+t7.7] w[+mC]=R84E05-p65.AD}attP40; P{y[+t7.7] w[+mC]=VT005106-GAL4.DBD}attP2
SS22035	Adult	Jens Goldammer	Rubin	1	N	No	No	10.1101/2024.01.09.574419	Meissner; 2024	3023867	OCG04		VT000877-x-VT028198	w[1118]; P{y[+t7.7] w[+mC]=VT000877-p65.AD}attP40; P{y[+t7.7] w[+mC]=VT028198-GAL4.DBD}attP2
SS22118	Adult	Jens Goldammer	Rubin	2	N	No	No	10.1101/2024.01.09.574419	Meissner; 2024	3023853	VES019-VES023, CL119-CL121, No Names: 1569256602, 1507182930, 1505140214, 1724124614, 1599323719, 1350367449		VT063540-x-VT045661	w[1118]; P{y[+t7.7] w[+mC]=VT063540-p65.AD}attP40; P{y[+t7.7] w[+mC]=VT045661-GAL4.DBD}attP2
SS22293	Adult	Aljoscha Nern	Rubin	1	N	No	Yes	10.1101/2024.01.09.574419	Meissner; 2024	3030095	PLP0008, TuTu		GMR_21D03-x-VT033054	w[1118]; P{y[+t7.7] w[+mC]=R21D03-p65.AD}attP40; P{y[+t7.7] w[+mC]=VT033054-GAL4.DBD}attP2
SS22296	Adult	Aljoscha Nern	Rubin	1	N	No	No	10.1101/2024.01.09.574419	Meissner; 2024	3030088	PLP0008		GMR_21D03-x-VT043166	w[1118]; P{y[+t7.7] w[+mC]=R21D03-p65.AD}attP40; P{y[+t7.7] w[+mC]=VT043166-GAL4.DBD}attP2
SS22437	Adult	Aljoscha Nern	Rubin	2	N	No	No	10.1101/2024.01.09.574419	Meissner; 2024	3023153	PVLP071		VT013594-x-VT002857	w[1118]; P{y[+t7.7] w[+mC]=VT013594-p65.AD}attP40; P{y[+t7.7] w[+mC]=VT002857-GAL4.DBD}attP2
SS22441	Adult	Aljoscha Nern	Rubin	1	N	No	No	10.1101/2024.01.09.574419	Meissner; 2024	3023156	PVLP071		VT056376-x-VT002857	w[1118]; P{y[+t7.7] w[+mC]=VT056376-p65.AD}attP40/CyO, P{2xTb[1]-RFP}CyO; P{y[+t7.7] w[+mC]=VT002857-GAL4.DBD}attP2
SS22505	Adult	Jens Goldammer	Rubin	2	N	No	Yes	10.1101/2024.01.09.574419	Meissner; 2024	3025211	PS159, PS161		VT020825-x-VT026018	w[1118]; P{y[+t7.7] w[+mC]=VT020825-p65.AD}attP40; P{y[+t7.7] w[+mC]=VT026018-GAL4.DBD}attP2
SS23197	Adult	Barry Dickson	Dickson	2	N	No	No	10.1101/2024.01.09.574419	Meissner; 2024	3024002			GMR_64A12-x-GMR_84B09	w[1118]; P{y[+t7.7] w[+mC]=R64A12-p65.AD}attP40; P{y[+t7.7] w[+mC]=R84B09-GAL4.DBD}attP2
SS23540	Adult	Jens Goldammer	Rubin	1	N	No	No	10.1101/2024.01.09.574419	Meissner; 2024	3023906	PS078-PS079, PS077		GMR_79C09-x-GMR_12E04	w[1118]; P{y[+t7.7] w[+mC]=R79C09-p65.AD}attP40; P{y[+t7.7] w[+mC]=R12E04-GAL4.DBD}attP2
SS23556	Adult	Masayoshi Ito	Rubin	2	N	No	No	10.1101/2024.01.09.574419	Meissner; 2024	3024741	SLP405_a, _b, _c		GMR_64F08-x-GMR_49C08	w[1118]; P{y[+t7.7] w[+mC]=R64F08-p65.AD}attP40; P{y[+t7.7] w[+mC]=R49C08-GAL4.DBD}attP2
SS23599	Adult	Jens Goldammer	Rubin	1	N	No	No	10.1101/2024.01.09.574419	Meissner; 2024	3039086	unknown GNG type 2		VT037537-x-GMR_66B07	w[1118]; P{y[+t7.7] w[+mC]=VT037537-p65.AD}attP40; P{y[+t7.7] w[+mC]=R66B07-GAL4.DBD}attP2
SS23691	Adult	Aljoscha Nern	Rubin	2	N	No	No	10.1101/2024.01.09.574419	Meissner; 2024	3023715	PVLP067/68 and/or similar		VT050239-x-VT012790	w[1118]; P{y[+t7.7] w[+mC]=VT050239-p65.AD}attP40; P{y[+t7.7] w[+mC]=VT012790-GAL4.DBD}attP2
SS23720	Adult	Aljoscha Nern	Rubin	1	N	No	Yes	10.1101/2024.01.09.574419	Meissner; 2024	3023724	PVLP067/68 and/or similar		VT012790-x-VT050239	w[1118]; P{y[+t7.7] w[+mC]=VT012790-p65.AD}attP40; P{y[+t7.7] w[+mC]=VT050239-GAL4.DBD}attP2
SS24617	Adult	Masayoshi Ito	Rubin	1	N	No	Yes	10.1101/2024.01.09.574419	Meissner; 2024	3024734	LHPD5b1		VT026655-x-GMR_26C12	w[1118]; P{y[+t7.7] w[+mC]=VT026655-p65.AD}attP40; P{y[+t7.7] w[+mC]=R26C12-GAL4.DBD}attP2
SS24860	Adult	Jens Goldammer	Rubin	2	N	No	No	10.1101/2024.01.09.574419	Meissner; 2024	3023892	CL171		GMR_48F12-x-GMR_48H11	w[1118]; P{y[+t7.7] w[+mC]=R48F12-p65.AD}attP40; P{y[+t7.7] w[+mC]=R48H11-GAL4.DBD}attP2
SS24868	Adult	Jens Goldammer	Rubin	1	N	No	No	10.1101/2024.01.09.574419	Meissner; 2024	3023856	PS043-PS044, SAD005-SAD007		VT043144-x-VT003478	w[1118]; P{y[+t7.7] w[+mC]=VT043144-p65.AD}attP40; P{y[+t7.7] w[+mC]=VT003478-GAL4.DBD}attP2
SS24913	Adult	Masayoshi Ito	Rubin	1	N	No	Yes	10.1101/2024.01.09.574419	Meissner; 2024	3024302			VT034811-x-GMR_78G04	w[1118]; P{y[+t7.7] w[+mC]=VT034811-p65.AD}attP40; P{y[+t7.7] w[+mC]=R78G04-GAL4.DBD}attP2
SS25095	Adult	Aljoscha Nern	Rubin	2	N	No	No	10.1101/2024.01.09.574419	Meissner; 2024	3024226			GMR_20D07-x-VT039959	w[1118]; P{y[+t7.7] w[+mC]=R20D07-p65.AD}attP40/CyO, P{w[+mC]=2xTb[1]-RFP}CyO; P{y[+t7.7] w[+mC]=VT039959-GAL4.DBD}attP2
SS25106	Adult	Aljoscha Nern	Rubin	1	N	No	No	10.1101/2024.01.09.574419	Meissner; 2024	3024231	PVLP097 or similar		GMR_20D07-x-GMR_67B01	w[1118]; P{y[+t7.7] w[+mC]=R20D07-p65.AD}attP40/CyO, P{w[+mC]=2xTb[1]-RFP}CyO; P{y[+t7.7] w[+mC]=R67B01-GAL4.DBD}attP2/TM6B, Tb[1]
SS25165	Adult	Aljoscha Nern	Rubin	1	N	No	Yes	10.1101/2024.01.09.574419	Meissner; 2024	3024251	PLP219		GMR_76B06-x-GMR_81D05	w[1118]; P{y[+t7.7] w[+mC]=R76B06-p65.AD}attP40; P{y[+t7.7] w[+mC]=R81D05-GAL4.DBD}attP2
SS25466	Adult	Ryo Minegishi	Dickson	1	N	No	No	10.1101/2024.01.09.574419	Meissner; 2024	3028844	LBA9, LBI15		VT039624-x-VT043132	w[1118]; P{y[+t7.7] w[+mC]=VT039624-p65.AD}attP40; P{y[+t7.7] w[+mC]=VT043132-GAL4.DBD}attP2
SS25473	Adult	Ryo Minegishi	Dickson	1	N	No	No	10.1101/2024.01.09.574419	Meissner; 2024	3028845	LBI66		VT043084-x-VT061518	w[1118]; P{y[+t7.7] w[+mC]=VT043084-p65.AD}attP40; P{y[+t7.7] w[+mC]=VT061518-GAL4.DBD}attP2
SS25480	Adult	Ryo Minegishi	Dickson	1	N	No	No	10.1101/2024.01.09.574419	Meissner; 2024	3028846	LBI2, LBI6		VT044957-x-VT019728	w[1118]; P{y[+t7.7] w[+mC]=VT044957-p65.AD}attP40/CyO; P{y[+t7.7] w[+mC]=VT019728-GAL4.DBD}attP2
SS25504	Adult	Ryo Minegishi	Dickson	1	N	No	No	10.1101/2024.01.09.574419	Meissner; 2024	3028856	LBI2, LBI6		VT050226-x-VT046808	w[1118]; P{y[+t7.7] w[+mC]=VT050226-p65.AD}attP40; P{y[+t7.7] w[+mC]=VT046808-GAL4.DBD}attP2/TM6B, Tb[1]
SS25516	Adult	Ryo Minegishi	Dickson	2	N	No	No	10.1101/2024.01.09.574419	Meissner; 2024	3028367	LBL23, LBL24, LUI8		VT008537-x-VT055068	w[1118]; P{y[+t7.7] w[+mC]=VT008537-p65.AD}attP40; P{y[+t7.7] w[+mC]=VT055068-GAL4.DBD}attP2
SS25564	Adult	Jim Truman	Truman	1	N	No	No	10.1101/2024.01.09.574419	Meissner; 2024	3024181	12A		VT057294-x-VT009094	w[1118]; P{y[+t7.7] w[+mC]=VT057294-p65.AD}attP40; P{y[+t7.7] w[+mC]=VT009094-GAL4.DBD}attP2
SS25572	Adult	Jim Truman	Truman	2	N	No	No	10.1101/2024.01.09.574419	Meissner; 2024	3024184	06A		VT039769-x-VT005526	w[1118]; P{y[+t7.7] w[+mC]=VT039769-p65.AD}attP40; P{y[+t7.7] w[+mC]=VT005526-GAL4.DBD}attP2
SS25573	Adult	Jim Truman	Truman	2	N	No	No	10.1101/2024.01.09.574419	Meissner; 2024	3024185	06A		VT039769-x-VT008191	w[1118]; P{y[+t7.7] w[+mC]=VT039769-p65.AD}attP40; P{y[+t7.7] w[+mC]=VT008191-GAL4.DBD}attP2
SS25575	Adult	Jim Truman	Truman	2	N	No	No	10.1101/2024.01.09.574419	Meissner; 2024	3024186	08A		VT030297-x-VT040724	w[1118]; P{y[+t7.7] w[+mC]=VT030297-p65.AD}attP40; P{y[+t7.7] w[+mC]=VT040724-GAL4.DBD}attP2
SS25576	Adult	Jim Truman	Truman	2	N	No	No	10.1101/2024.01.09.574419	Meissner; 2024	3024187	08A, 06B		VT030297-x-VT019423	w[1118]; P{y[+t7.7] w[+mC]=VT030297-p65.AD}attP40; P{y[+t7.7] w[+mC]=VT019423-GAL4.DBD}attP2/TM6B, Tb[1]
SS25577	Adult	Jim Truman	Truman	2	N	No	No	10.1101/2024.01.09.574419	Meissner; 2024	3024188	08A		VT039475-x-VT040724	w[1118]; P{y[+t7.7] w[+mC]=VT039475-p65.AD}attP40; P{y[+t7.7] w[+mC]=VT040724-GAL4.DBD}attP2
SS25580	Adult	Jim Truman	Truman	2	N	No	No	10.1101/2024.01.09.574419	Meissner; 2024	3024190	06B		VT004417-x-GMR_86D08	w[1118]; P{y[+t7.7] w[+mC]=VT004417-p65.AD}attP40; P{y[+t7.7] w[+mC]=R86D08-GAL4.DBD}attP2
SS25582	Adult	Jim Truman	Truman	1	N	Yes	No	10.1101/2024.01.09.574419	Meissner; 2024	3024191	12A		GMR_22H01-x-VT009094	w[1118]; P{y[+t7.7] w[+mC]=R22H01-p65.AD}attP40; P{y[+t7.7] w[+mC]=VT009094-GAL4.DBD}attP2
SS25585	Adult	Jim Truman	Truman	2	N	No	No	10.1101/2024.01.09.574419	Meissner; 2024	3024194	18B		GMR_26B06-x-VT027008	w[1118]; P{y[+t7.7] w[+mC]=R26B06-p65.AD}attP40; P{y[+t7.7] w[+mC]=VT027008-GAL4.DBD}attP2
SS25586	Adult	Jim Truman	Truman	2	N	No	No	10.1101/2024.01.09.574419	Meissner; 2024	3024195	18B		GMR_26B06-x-VT064564	w[1118]; P{y[+t7.7] w[+mC]=R26B06-p65.AD}attP40; P{y[+t7.7] w[+mC]=VT064564-GAL4.DBD}attP2
SS25587	Adult	Jim Truman	Truman	1	N	No	No	10.1101/2024.01.09.574419	Meissner; 2024	3024196	18B		GMR_26B06-x-VT061933	w[1118]; P{y[+t7.7] w[+mC]=R26B06-p65.AD}attP40; P{y[+t7.7] w[+mC]=VT061933-GAL4.DBD}attP2
SS25594	Adult	Jim Truman	Truman	2	N	No	No	10.1101/2024.01.09.574419	Meissner; 2024	3024198	02A		GMR_50G08-x-VT008533	w[1118]; P{y[+t7.7] w[+mC]=R50G08-p65.AD}attP40; P{y[+t7.7] w[+mC]=VT008533-GAL4.DBD}attP2
SS25597	Adult	Jim Truman	Truman	1	N	No	No	10.1101/2024.01.09.574419	Meissner; 2024	3024200	19B		GMR_91F05-x-VT060731	w[1118]; P{y[+t7.7] w[+mC]=R91F05-p65.AD}attP40/CyO, P{w[+mC]=2xTb[1]-RFP}CyO; P{y[+t7.7] w[+mC]=VT060731-GAL4.DBD}attP2
SS25733	Adult	Barry Dickson	Dickson	1	N	No	Yes	10.1101/2024.01.09.574419	Meissner; 2024	3024004			GMR_93D10-x-GMR_94D12	w[1118]; P{y[+t7.7] w[+mC]=R93D10-p65.AD}attP40; P{y[+t7.7] w[+mC]=R94D12-GAL4.DBD}attP2
SS25735	Adult	Kaiyu Wang	Dickson	1	N	No	No	10.1101/2024.01.09.574419	Meissner; 2024	3024005			GMR_94D12-x-GMR_93D11	w[1118]; P{y[+t7.7] w[+mC]=R94D12-p65.AD}attP40/CyO, P{w[+mC]=2xTb[1]-RFP}CyO; P{y[+t7.7] w[+mC]=R93D11-GAL4.DBD}attP2
SS25885	Adult	Kaiyu Wang	Dickson	1	N	Yes	No	10.1101/2024.01.09.574419	Meissner; 2024	3031525	VNC		VT031084-x-VT033614	w[1118]; P{y[+t7.7] w[+mC]=VT031084-p65.AD}attP40; P{y[+t7.7] w[+mC]=VT033614-GAL4.DBD}attP2
SS26094	Adult	Masayoshi Ito	Rubin	2	N	No	No	10.1101/2024.01.09.574419	Meissner; 2024	3024334	ATL001		GMR_91D10-x-GMR_77A01	w[1118]; P{y[+t7.7] w[+mC]=R91D10-p65.AD}attP40; P{y[+t7.7] w[+mC]=R77A01-GAL4.DBD}attP2
SS26356	Adult	Masayoshi Ito	Rubin	2	N	No	No	10.1101/2024.01.09.574419	Meissner; 2024	3024306	SLP092?		VT015830-x-GMR_89B12	w[1118]; P{y[+t7.7] w[+mC]=VT015830-p65.AD}attP40; P{y[+t7.7] w[+mC]=R89B12-GAL4.DBD}attP2
SS26358	Adult	Masayoshi Ito	Rubin	1	N	No	Yes	10.1101/2024.01.09.574419	Meissner; 2024	3024305			VT015830-x-VT033463	w[1118]; P{y[+t7.7] w[+mC]=VT015830-p65.AD}attP40; P{y[+t7.7] w[+mC]=VT033463-GAL4.DBD}attP2
SS26371	Adult	Masayoshi Ito	Rubin	1	N	No	Yes	10.1101/2024.01.09.574419	Meissner; 2024	3024299	SLP082		VT046821-x-GMR_82F01	w[1118]; P{y[+t7.7] w[+mC]=VT046821-p65.AD}attP40; P{y[+t7.7] w[+mC]=R82F01-GAL4.DBD}attP2
SS26913	Adult	Jens Goldammer	Rubin	2	N	No	No	10.1101/2024.01.09.574419	Meissner; 2024	3025225	OCG07		GMR_40C02-x-GMR_89A03	w[1118]; P{y[+t7.7] w[+mC]=R40C02-p65.AD}attP40/CyO, P{w[+mC]=2xTb[1]-RFP}CyO; P{y[+t7.7] w[+mC]=R89A03-GAL4.DBD}attP2
SS26926	Adult	Jens Goldammer	Rubin	1	N	No	No	10.1101/2024.01.09.574419	Meissner; 2024	3025218	OCG09		GMR_38H01-x-GMR_58G03	w[1118]; P{y[+t7.7] w[+mC]=R38H01-p65.AD}attP40/CyO, P{w[+mC]=2xTb[1]-RFP}CyO; P{y[+t7.7] w[+mC]=R58G03-GAL4.DBD}attP2/TM6B, Tb[1]
SS26953	Adult	Jim Truman	Truman	2	N	No	No	10.1101/2024.01.09.574419	Meissner; 2024	3024795	20A-22A		VT003849-x-GMR_72E09	w[1118]; P{y[+t7.7] w[+mC]=VT003849-p65.AD}attP40; P{y[+t7.7] w[+mC]=R72E09-GAL4.DBD}attP2
SS26967	Adult	Jim Truman	Truman	2	N	No	No	10.1101/2024.01.09.574419	Meissner; 2024	3024783	06A		GMR_96A08-x-VT039769	w[1118]; P{y[+t7.7] w[+mC]=R96A08-p65.AD}attP40; P{y[+t7.7] w[+mC]=VT039769-GAL4.DBD}attP2
SS26968	Adult	Jim Truman	Truman	2	N	No	No	10.1101/2024.01.09.574419	Meissner; 2024	3024797	20A-22A		GMR_37G12-x-GMR_72E09	w[1118]; P{y[+t7.7] w[+mC]=R37G12-p65.AD}attP40; P{y[+t7.7] w[+mC]=R72E09-GAL4.DBD}attP2
SS26973	Adult	Jim Truman	Truman	2	N	No	No	10.1101/2024.01.09.574419	Meissner; 2024	3024798	20A-22A		GMR_75H10-x-GMR_72E09	w[1118]; P{y[+t7.7] w[+mC]=R75H10-p65.AD}attP40; P{y[+t7.7] w[+mC]=R72E09-GAL4.DBD}attP2
SS26974	Adult	Jim Truman	Truman	2	N	No	No	10.1101/2024.01.09.574419	Meissner; 2024	3024785	20A-22A		GMR_75H10-x-GMR_92A08	w[1118]; P{y[+t7.7] w[+mC]=R75H10-p65.AD}attP40; P{y[+t7.7] w[+mC]=R92A08-GAL4.DBD}attP2
SS26977	Adult	Jim Truman	Truman	2	N	No	No	10.1101/2024.01.09.574419	Meissner; 2024	3024800	21A		GMR_72H09-x-GMR_54B03	w[1118]; P{y[+t7.7] w[+mC]=R72H09-p65.AD}attP40; P{y[+t7.7] w[+mC]=R54B03-GAL4.DBD}attP2/TM6B, Tb[1]
SS27135	Adult	Masayoshi Ito	Rubin	1	N	No	No	10.1101/2024.01.09.574419	Meissner; 2024	3024315	AVLP041?, AVLP042?		GMR_29G03-x-GMR_38E10	w[1118]; P{y[+t7.7] w[+mC]=R29G03-p65.AD}attP40; P{y[+t7.7] w[+mC]=R38E10-GAL4.DBD}attP2
SS27137	Adult	Masayoshi Ito	Rubin	2	N	No	No	10.1101/2024.01.09.574419	Meissner; 2024	3024316			GMR_29G03-x-GMR_87G07	w[1118]; P{y[+t7.7] w[+mC]=R29G03-p65.AD}attP40/CyO, P{w[+mC]=2xTb[1]-RFP}CyO; P{y[+t7.7] w[+mC]=R87G07-GAL4.DBD}attP2
SS27191	Adult	Kaiyu Wang	Dickson	2	N	No	No	10.1101/2024.01.09.574419	Meissner; 2024	3030383			VT025718-x-VT043086	w[1118]; P{y[+t7.7] w[+mC]=VT025718-p65.AD}attP40/CyO, P{w[+mC]=2xTb[1]-RFP}CyO; P{y[+t7.7] w[+mC]=VT043086-GAL4.DBD}attP2
SS27239	Adult	Masayoshi Ito	Rubin	1	N	No	Yes	10.1101/2024.01.09.574419	Meissner; 2024	3024310	CL022		GMR_23G11-x-GMR_30C01	w[1118]; P{y[+t7.7] w[+mC]=R23G11-p65.AD}attP40; P{y[+t7.7] w[+mC]=R30C01-GAL4.DBD}attP2
SS27255	Adult	Masayoshi Ito	Rubin	1	N	No	Yes	10.1101/2024.01.09.574419	Meissner; 2024	3024326			GMR_46F09-x-GMR_77B11	w[1118]; P{y[+t7.7] w[+mC]=R46F09-p65.AD}attP40; P{y[+t7.7] w[+mC]=R77B11-GAL4.DBD}attP2
SS27265	Adult	Jens Goldammer	Rubin	2	N	No	No	10.1101/2024.01.09.574419	Meissner; 2024	3039138	unknown GNG type 1		GMR_60D10-x-GMR_38B11	w[1118]; P{y[+t7.7] w[+mC]=R60D10-p65.AD}attP40; P{y[+t7.7] w[+mC]=R38B11-GAL4.DBD}attP2
SS27422	Adult	Ryo Minegishi	Dickson	1	N	Yes	No	10.1101/2024.01.09.574419	Meissner; 2024	3028460	LUL58		GMR_85C01-x-GMR_12D09	w[1118]; P{y[+t7.7] w[+mC]=R85C01-p65.AD}attP40/CyO, P{w[+mC]=2xTb[1]-RFP}CyO; P{y[+t7.7] w[+mC]=R12D09-GAL4.DBD}attP2/TM6B, Tb[1]
SS27425	Adult	Ryo Minegishi	Dickson	2	N	No	No	10.1101/2024.01.09.574419	Meissner; 2024	3028882	LUL58		GMR_89G04-x-GMR_52E12	w[1118]; P{y[+t7.7] w[+mC]=R89G04-p65.AD}attP40/CyO; P{y[+t7.7] w[+mC]=R52E12-GAL4.DBD}attP2/TM6B, Tb[1]
SS27580	Adult	Masayoshi Ito	Rubin	2	N	No	No	10.1101/2024.01.09.574419	Meissner; 2024	3024969	MBDL		GMR_45F09-x-GMR_70E08	w[1118]; P{y[+t7.7] w[+mC]=R45F09-p65.AD}attP40; P{y[+t7.7] w[+mC]=R70E08-GAL4.DBD}attP2
SS27590	Adult	Masayoshi Ito	Rubin	1	N	No	No	10.1101/2024.01.09.574419	Meissner; 2024	3024944	MBDL		GMR_34E12-x-GMR_53E11	w[1118]; P{y[+t7.7] w[+mC]=R34E12-p65.AD}attP40; P{y[+t7.7] w[+mC]=R53E11-GAL4.DBD}attP2
SS27649	Adult	Jens Goldammer	Rubin	2	N	No	No	10.1101/2024.01.09.574419	Meissner; 2024	3025227	PLP196		GMR_59B10-x-GMR_85F12	w[1118]; P{y[+t7.7] w[+mC]=R59B10-p65.AD}attP40; P{y[+t7.7] w[+mC]=R85F12-GAL4.DBD}attP2
SS27959	Adult	Masayoshi Ito	Rubin	1	N	No	Yes	10.1101/2024.01.09.574419	Meissner; 2024	3024942			GMR_48A08-x-GMR_60F09	w[1118]; P{y[+t7.7] w[+mC]=R48A08-p65.AD}attP40; P{y[+t7.7] w[+mC]=R60F09-GAL4.DBD}attP2
SS27970	Adult	Masayoshi Ito	Rubin	1	N	No	Yes	10.1101/2024.01.09.574419	Meissner; 2024	3024957			GMR_22E07-x-GMR_16B04	w[1118]; P{y[+t7.7] w[+mC]=R22E07-p65.AD}attP40; P{y[+t7.7] w[+mC]=R16B04-GAL4.DBD}attP2
SS27991	Adult	Masayoshi Ito	Rubin	1	Y	No	Yes	10.1101/2024.01.09.574419	Meissner; 2024	3024958			GMR_92E10-x-GMR_16B04	w[1118]; P{y[+t7.7] w[+mC]=R92E10-p65.AD}attP40; P{y[+t7.7] w[+mC]=R16B04-GAL4.DBD}attP2
SS28003	Adult	Ryo Minegishi	Dickson	1	N	No	No	10.1101/2024.01.09.574419	Meissner; 2024	3029274	LBL46, LBL47		GMR_91F05-x-GMR_9C12	w[1118]; P{y[+t7.7] w[+mC]=R91F05-p65.AD}attP40/CyO, P{w[+mC]=2xTb[1]-RFP}CyO; P{y[+t7.7] w[+mC]=R9C12-GAL4.DBD}attP2
SS28010	Adult	Ryo Minegishi	Dickson	1	N	No	No	10.1101/2024.01.09.574419	Meissner; 2024	3028884	LBL49		GMR_70D06-x-GMR_59E04	w[1118]; P{y[+t7.7] w[+mC]=R70D06-p65.AD}attP40; P{y[+t7.7] w[+mC]=R59E04-GAL4.DBD}attP2
SS28035	Adult	Ryo Minegishi	Dickson	1	N	Yes	No	10.1101/2024.01.09.574419	Meissner; 2024	3028888	LBI1		GMR_33C01-x-GMR_70C10	w[1118]; P{y[+t7.7] w[+mC]=R33C01-p65.AD}attP40; P{y[+t7.7] w[+mC]=R70C10-GAL4.DBD}attP2/TM6B, Tb[1]
SS28218	Adult	Jens Goldammer	Rubin	1	N	No	No	10.1101/2024.01.09.574419	Meissner; 2024	3025204	CL128		VT008462-x-VT019073	w[1118]; P{y[+t7.7] w[+mC]=VT008462-p65.AD}attP40; P{y[+t7.7] w[+mC]=VT019073-GAL4.DBD}attP2/TM6B, Tb[1]
SS28428	Adult	Ryo Minegishi	Dickson	2	N	No	No	10.1101/2024.01.09.574419	Meissner; 2024	3028620	unpaired		VT029799-x-VT013605	w[1118]; P{y[+t7.7] w[+mC]=VT029799-p65.AD}attP40; P{y[+t7.7] w[+mC]=VT013605-GAL4.DBD}attP2/TM6B, Tb[1]
SS28453	Adult	Ryo Minegishi	Dickson	2	N	No	No	10.1101/2024.01.09.574419	Meissner; 2024	3028372	LUI6		GMR_52G05-x-GMR_85A03	w[1118]; P{y[+t7.7] w[+mC]=R52G05-p65.AD}attP40; P{y[+t7.7] w[+mC]=R85A03-GAL4.DBD}attP2
SS28598	Adult	Jim Truman	Truman	2	N	No	No	10.1101/2024.01.09.574419	Meissner; 2024	3024802	07B		VT044958-x-GMR_92A11	w[1118]; P{y[+t7.7] w[+mC]=VT044958-p65.AD}attP40; P{y[+t7.7] w[+mC]=R92A11-GAL4.DBD}attP2
SS28630	Adult	Masayoshi Ito	Rubin	1	N	No	Yes	10.1101/2024.01.09.574419	Meissner; 2024	3024961	SMP564		GMR_42E03-x-GMR_45G05	w[1118]; P{y[+t7.7] w[+mC]=R42E03-p65.AD}attP40; P{y[+t7.7] w[+mC]=R45G05-GAL4.DBD}attP2
SS28776	Adult	Masayoshi Ito	Rubin	1	N	No	No	10.1101/2024.01.09.574419	Meissner; 2024	3024966	PI1_a		GMR_18B10-x-GMR_35G08	w[1118]; P{y[+t7.7] w[+mC]=R18B10-p65.AD}attP40; P{y[+t7.7] w[+mC]=R35G08-GAL4.DBD}attP2
SS28784	Adult	Masayoshi Ito	Rubin	1	N	No	Yes	10.1101/2024.01.09.574419	Meissner; 2024	3024972	SMP359_b		GMR_64A12-x-GMR_82F01	w[1118]; P{y[+t7.7] w[+mC]=R64A12-p65.AD}attP40; P{y[+t7.7] w[+mC]=R82F01-GAL4.DBD}attP2
SS28827	Adult	Aljoscha Nern	Rubin	1	N	No	No	10.1101/2024.01.09.574419	Meissner; 2024	3024793	AVLP TBD		VT057295-x-GMR_22C12	w[1118]; P{y[+t7.7] w[+mC]=VT057295-p65.AD}attP40; P{y[+t7.7] w[+mC]=R22C12-GAL4.DBD}attP2/TM6B, Tb[1]
SS28943	Adult	Jim Truman	Truman	2	N	No	No	10.1101/2024.01.09.574419	Meissner; 2024	3024903	10B		VT016127-x-VT000688	w[1118]; P{y[+t7.7] w[+mC]=VT016127-p65.AD}attP40; P{y[+t7.7] w[+mC]=VT000688-GAL4.DBD}attP2
SS28945	Adult	Jim Truman	Truman	2	N	No	No	10.1101/2024.01.09.574419	Meissner; 2024	3024907	00A		VT016127-x-VT063306	w[1118]; P{y[+t7.7] w[+mC]=VT016127-p65.AD}attP40; P{y[+t7.7] w[+mC]=VT063306-GAL4.DBD}attP2/TM6B, Tb[1]
SS28951	Adult	Jim Truman	Truman	2	N	No	No	10.1101/2024.01.09.574419	Meissner; 2024	3024896	06B		VT014712-x-VT046792	w[1118]; P{y[+t7.7] w[+mC]=VT014712-p65.AD}attP40; P{y[+t7.7] w[+mC]=VT046792-GAL4.DBD}attP2
SS28953	Adult	Jim Truman	Truman	2	N	No	No	10.1101/2024.01.09.574419	Meissner; 2024	3024912	06B		VT014712-x-VT045240	w[1118]; P{y[+t7.7] w[+mC]=VT014712-p65.AD}attP40; P{y[+t7.7] w[+mC]=VT045240-GAL4.DBD}attP2
SS28954	Adult	Jim Truman	Truman	2	N	No	No	10.1101/2024.01.09.574419	Meissner; 2024	3024913	06B		VT014712-x-VT008133	w[1118]; P{y[+t7.7] w[+mC]=VT014712-p65.AD}attP40; P{y[+t7.7] w[+mC]=VT008133-GAL4.DBD}attP2
SS28958	Adult	Jim Truman	Truman	2	N	No	No	10.1101/2024.01.09.574419	Meissner; 2024	3024901	09A		VT026324-x-VT047276	w[1118]; P{y[+t7.7] w[+mC]=VT026324-p65.AD}attP40; P{y[+t7.7] w[+mC]=VT047276-GAL4.DBD}attP2
SS28961	Adult	Jim Truman	Truman	2	N	No	No	10.1101/2024.01.09.574419	Meissner; 2024	3024900	09A		VT049362-x-VT047276	w[1118]; P{y[+t7.7] w[+mC]=VT049362-p65.AD}attP40; P{y[+t7.7] w[+mC]=VT047276-GAL4.DBD}attP2
SS28963	Adult	Jim Truman	Truman	1	N	No	No	10.1101/2024.01.09.574419	Meissner; 2024	3024897	09A		VT049362-x-VT026324	w[1118]; P{y[+t7.7] w[+mC]=VT049362-p65.AD}attP40; P{y[+t7.7] w[+mC]=VT026324-GAL4.DBD}attP2
SS28965	Adult	Jim Truman	Truman	2	N	No	No	10.1101/2024.01.09.574419	Meissner; 2024	3024910	00A		VT048865-x-VT063306	w[1118]; P{y[+t7.7] w[+mC]=VT048865-p65.AD}attP40; P{y[+t7.7] w[+mC]=VT063306-GAL4.DBD}attP2/TM6B, Tb[1]
SS28966	Adult	Jim Truman	Truman	2	N	No	No	10.1101/2024.01.09.574419	Meissner; 2024	3024893	09A		VT047276-x-VT040016	w[1118]; P{y[+t7.7] w[+mC]=VT047276-p65.AD}attP40; P{y[+t7.7] w[+mC]=VT040016-GAL4.DBD}attP2
SS28969	Adult	Jim Truman	Truman	2	N	No	No	10.1101/2024.01.09.574419	Meissner; 2024	3024908	06B; MN		VT028447-x-VT063306	w[1118]; P{y[+t7.7] w[+mC]=VT028447-p65.AD}attP40; P{y[+t7.7] w[+mC]=VT063306-GAL4.DBD}attP2/TM6B, Tb[1]
SS28970	Adult	Jim Truman	Truman	2	N	No	No	10.1101/2024.01.09.574419	Meissner; 2024	3024914	06B		VT044655-x-VT057469	w[1118]; P{y[+t7.7] w[+mC]=VT044655-p65.AD}attP40; P{y[+t7.7] w[+mC]=VT057469-GAL4.DBD}attP2
SS28975	Adult	Jim Truman	Truman	2	N	No	No	10.1101/2024.01.09.574419	Meissner; 2024	3024892	09A		VT000360-x-VT040016	w[1118]; P{y[+t7.7] w[+mC]=VT000360-p65.AD}attP40; P{y[+t7.7] w[+mC]=VT040016-GAL4.DBD}attP2
SS28977	Adult	Jim Truman	Truman	1	N	No	No	10.1101/2024.01.09.574419	Meissner; 2024	3024905	09A		GMR_30A10-x-VT044946	w[1118]; P{y[+t7.7] w[+mC]=R30A10-p65.AD}attP40; P{y[+t7.7] w[+mC]=VT044946-GAL4.DBD}attP2
SS28980	Adult	Jim Truman	Truman	1	N	Yes	No	10.1101/2024.01.09.574419	Meissner; 2024	3024906	09A		GMR_52E12-x-VT037862	w[1118]; P{y[+t7.7] w[+mC]=R52E12-p65.AD}attP40; P{y[+t7.7] w[+mC]=VT037862-GAL4.DBD}attP2
SS29118	Adult	Gerry Rubin	Rubin	1	N	No	No	10.1101/2024.01.09.574419	Meissner; 2024	3031720	unknown		GMR_28A08-x-GMR_25C01	w[1118]; P{y[+t7.7] w[+mC]=R28A08-p65.AD}attP40/CyO, P{w[+mC]=2xTb[1]-RFP}CyO; P{y[+t7.7] w[+mC]=R25C01-GAL4.DBD}attP2
SS29144	Adult	Aljoscha Nern	Rubin	1	N	No	No	10.1101/2024.01.09.574419	Meissner; 2024	3024874	AVLP466 or similar		GMR_44H01-x-GMR_45F11	w[1118]; P{y[+t7.7] w[+mC]=R44H01-p65.AD}attP40; P{y[+t7.7] w[+mC]=R45F11-GAL4.DBD}attP2/TM6B, Tb[1]
SS29243	Adult	Gabriella Sterne	Dickson	2	N	No	No	10.1101/2024.01.09.574419	Meissner; 2024	3044405	butterfly		GMR_55C05-x-GMR_65F12	w[1118]; P{y[+t7.7] w[+mC]=R55C05-p65.AD}attP40/CyO; P{y[+t7.7] w[+mC]=R65F12-GAL4.DBD}attP2
SS29258	Adult	Jim Truman	Truman	2	N	No	No	10.1101/2024.01.09.574419	Meissner; 2024	3024891	09A		GMR_17C09-x-VT000767	w[1118]; P{y[+t7.7] w[+mC]=R17C09-p65.AD}attP40; P{y[+t7.7] w[+mC]=VT000767-GAL4.DBD}attP2
SS29276	Adult	Jens Goldammer	Rubin	1	N	No	Yes	10.1101/2024.01.09.574419	Meissner; 2024	3025209	PS108		VT026001-x-VT048854	w[1118]; P{y[+t7.7] w[+mC]=VT026001-p65.AD}attP40/CyO, P{w[+mC]=2xTb[1]-RFP}CyO; P{y[+t7.7] w[+mC]=VT048854-GAL4.DBD}attP2
SS29404	Adult	Aljoscha Nern	Rubin	1	N	No	No	10.1101/2024.01.09.574419	Meissner; 2024	3024872	PVLP024, PVLP025		VT044847-x-GMR_95A11	w[1118]; P{y[+t7.7] w[+mC]=VT044847-p65.AD}attP40; P{y[+t7.7] w[+mC]=R95A11-GAL4.DBD}attP2
SS29662	Adult	Ryo Minegishi	Dickson	1	N	Yes	No	10.1101/2024.01.09.574419	Meissner; 2024	3028374	LBL26, LBL27, LBL28		GMR_85A01-x-VT044168	w[1118]; P{y[+t7.7] w[+mC]=R85A01-p65.AD}attP40; P{y[+t7.7] w[+mC]=VT044168-GAL4.DBD}attP2
SS29675	Adult	Masayoshi Ito	Rubin	1	N	No	No	10.1101/2024.01.09.574419	Meissner; 2024	3025065	CRE054		GMR_38F08-x-GMR_53H03	w[1118]; P{y[+t7.7] w[+mC]=R38F08-p65.AD}attP40/CyO, P{w[+mC]=2xTb[1]-RFP}CyO; P{y[+t7.7] w[+mC]=R53H03-GAL4.DBD}attP2
SS29857	Adult	Ryo Minegishi	Dickson	2	N	No	No	10.1101/2024.01.09.574419	Meissner; 2024	3029368	LBL23		VT019718-x-VT055068	w; VT019718-p65ADZp in attP40; VT055068-ZpGdbd in attP2
SS29882	Adult	Ryo Minegishi	Dickson	1	N	Yes	No	10.1101/2024.01.09.574419	Meissner; 2024	3028910	LUL58		GMR_52E12-x-VT019330	w[1118]; P{y[+t7.7] w[+mC]=R52E12-p65.AD}attP40; P{y[+t7.7] w[+mC]=VT019330-GAL4.DBD}attP2
SS29886	Adult	Ryo Minegishi	Dickson	2	N	No	No	10.1101/2024.01.09.574419	Meissner; 2024	3028912	LUL1		GMR_60G04-x-VT063982	w[1118]; P{y[+t7.7] w[+mC]=R60G04-p65.AD}attP40; P{y[+t7.7] w[+mC]=VT063982-GAL4.DBD}attP2
SS29892	Adult	Ryo Minegishi	Dickson	2	N	No	No	10.1101/2024.01.09.574419	Meissner; 2024	3028913	LBL23, LBL24, LUI8		GMR_67F03-x-VT055068	w[1118]; P{y[+t7.7] w[+mC]=R67F03-p65.AD}attP40/CyO, P{w[+mC]=2xTb[1]-RFP}CyO; P{y[+t7.7] w[+mC]=VT055068-GAL4.DBD}attP2
SS29911	Adult	Jens Goldammer	Rubin	1	N	No	Yes	10.1101/2024.01.09.574419	Meissner; 2024	3025216	PS111		GMR_16E11-x-GMR_20G10	w[1118]; P{y[+t7.7] w[+mC]=R16E11-p65.AD}attP40; P{y[+t7.7] w[+mC]=R20G10-GAL4.DBD}attP2/TM6B, Tb[1]
SS29923	Adult	Jens Goldammer	Rubin	1	N	No	No	10.1101/2024.01.09.574419	Meissner; 2024	3039201	PS217, IB066		GMR_64B07-x-VT028547	w[1118]; P{y[+t7.7] w[+mC]=R64B07-p65.AD}attP40; P{y[+t7.7] w[+mC]=VT028547-GAL4.DBD}attP2/TM6B, Tb[+]
SS30185	Adult	Jim Truman	Truman	2	N	No	No	10.1101/2024.01.09.574419	Meissner; 2024	3024755	06B		GMR_26B04-x-VT018463	w[1118]; P{y[+t7.7] w[+mC]=R26B04-p65.AD}attP40; P{y[+t7.7] w[+mC]=VT018463-GAL4.DBD}attP2
SS30195	Adult	Masayoshi Ito	Rubin	1	N	No	Yes	10.1101/2024.01.09.574419	Meissner; 2024	3025076	SMP588		GMR_10D10-x-GMR_84A12	w[1118]; P{y[+t7.7] w[+mC]=R10D10-p65.AD}attP40; P{y[+t7.7] w[+mC]=R84A12-GAL4.DBD}attP2
SS30198	Adult	Masayoshi Ito	Rubin	2	N	No	No	10.1101/2024.01.09.574419	Meissner; 2024	3025066	SIP003_a?, SIP003_b?		GMR_16C09-x-GMR_19F01	w[1118]; P{y[+t7.7] w[+mC]=R16C09-p65.AD}attP40/CyO, P{w[+mC]=2xTb[1]-RFP}CyO; P{y[+t7.7] w[+mC]=R19F01-GAL4.DBD}attP2
SS30234	Adult	Masayoshi Ito	Rubin	1	N	No	Yes	10.1101/2024.01.09.574419	Meissner; 2024	3025064			GMR_40F04-x-GMR_35G07	w[1118]; P{y[+t7.7] w[+mC]=R40F04-p65.AD}attP40; P{y[+t7.7] w[+mC]=R35G07-GAL4.DBD}attP2
SS30265	Adult	Jens Goldammer	Rubin	1	N	No	No	10.1101/2024.01.09.574419	Meissner; 2024	3025210	PS119-PS122		VT045575-x-VT017683	w[1118]; P{y[+t7.7] w[+mC]=VT045575-p65.AD}attP40; P{y[+t7.7] w[+mC]=VT017683-GAL4.DBD}attP2
SS30784	Adult	Jim Truman	Truman	1	N	No	No	10.1101/2024.01.09.574419	Meissner; 2024	3025360	11B		VT043090-x-VT041432	w[1118]; P{y[+t7.7] w[+mC]=VT043090-p65.AD}attP40; P{y[+t7.7] w[+mC]=VT041432-GAL4.DBD}attP2
SS30787	Adult	Jim Truman	Truman	2	N	No	No	10.1101/2024.01.09.574419	Meissner; 2024	3025357	11B, 18B		VT043090-x-VT018834	w[1118]; P{y[+t7.7] w[+mC]=VT043090-p65.AD}attP40; P{y[+t7.7] w[+mC]=VT018834-GAL4.DBD}attP2/TM6B, Tb[1]
SS30790	Adult	Jim Truman	Truman	2	N	No	No	10.1101/2024.01.09.574419	Meissner; 2024	3025355	03B		VT043090-x-VT032899	w[1118]; P{y[+t7.7] w[+mC]=VT043090-p65.AD}attP40; P{y[+t7.7] w[+mC]=VT032899-GAL4.DBD}attP2
SS30793	Adult	Jim Truman	Truman	1	N	No	No	10.1101/2024.01.09.574419	Meissner; 2024	3025356	03B		VT043090-x-VT064571	w[1118]; P{y[+t7.7] w[+mC]=VT043090-p65.AD}attP40; P{y[+t7.7] w[+mC]=VT064571-GAL4.DBD}attP2
SS30798	Adult	Jim Truman	Truman	2	N	No	No	10.1101/2024.01.09.574419	Meissner; 2024	3025359	16B		VT025966-x-VT018834	w[1118]; P{y[+t7.7] w[+mC]=VT025966-p65.AD}attP40; P{y[+t7.7] w[+mC]=VT018834-GAL4.DBD}attP2/TM6B, Tb[1]
SS30800	Adult	Jim Truman	Truman	1	N	No	No	10.1101/2024.01.09.574419	Meissner; 2024	3025353	03B, 11B		VT007903-x-VT020605	w[1118]; P{y[+t7.7] w[+mC]=VT007903-p65.AD}attP40; P{y[+t7.7] w[+mC]=VT020605-GAL4.DBD}attP2
SS30801	Adult	Jim Truman	Truman	2	N	No	No	10.1101/2024.01.09.574419	Meissner; 2024	3025354	03B		VT007903-x-VT008183	w[1118]; P{y[+t7.7] w[+mC]=VT007903-p65.AD}attP40; P{y[+t7.7] w[+mC]=VT008183-GAL4.DBD}attP2
SS30804	Adult	Jim Truman	Truman	2	N	No	No	10.1101/2024.01.09.574419	Meissner; 2024	3025368	01B		GMR_30A10-x-GMR_55A03	w[1118]; P{y[+t7.7] w[+mC]=R30A10-p65.AD}attP40; P{y[+t7.7] w[+mC]=R55A03-GAL4.DBD}attP2
SS30815	Adult	Jim Truman	Truman	2	N	No	No	10.1101/2024.01.09.574419	Meissner; 2024	3025366	01B		VT044946-x-GMR_58F02	w[1118]; P{y[+t7.7] w[+mC]=VT044946-p65.AD}attP40; P{y[+t7.7] w[+mC]=R58F02-GAL4.DBD}attP2
SS30976	Adult	Jens Goldammer	Rubin	1	N	No	Yes	10.1101/2024.01.09.574419	Meissner; 2024	3039202	PLP156 and similar types		GMR_92D04-x-VT019771	w[1118]; P{y[+t7.7] w[+mC]=R92D04-p65.AD}attP40/CyO; P{y[+t7.7] w[+mC]=VT019771-GAL4.DBD}attP2/TM6B, Tb[1]
SS31266	Adult	DI	DI	1	N	Yes	No	10.1101/2024.01.09.574419	Meissner; 2024	3037659	LT-IN (stop)		VT029592-x-GMR_87D06	w[1118]; P{y[+t7.7] w[+mC]=VT029592-p65.AD}attP40; P{y[+t7.7] w[+mC]=R87D06-GAL4.DBD}attP2
SS31305	Adult	Ryo Minegishi	Dickson	1	N	Yes	No	10.1101/2024.01.09.574419	Meissner; 2024	3031838	LUL14, LUL15, LUL20		GMR_61A01-x-GMR_42B02	w[1118]; P{y[+t7.7] w[+mC]=R61A01-p65.AD}attP40; P{y[+t7.7] w[+mC]=R42B02-GAL4.DBD}attP2
SS31450	Adult	Jens Goldammer	Rubin	1	N	No	No	10.1101/2024.01.09.574419	Meissner; 2024	3039002	OCG01		GMR_82E12-x-VT000877	w[1118]; P{y[+t7.7] w[+mC]=R82E12-p65.AD}attP40/CyO; P{y[+t7.7] w[+mC]=VT000877-GAL4.DBD}attP2
SS31465	Adult	Jim Truman	Truman	2	N	No	No	10.1101/2024.01.09.574419	Meissner; 2024	3027685	07B		GMR_20E07-x-GMR_87G07	w[1118]; P{y[+t7.7] w[+mC]=R20E07-p65.AD}attP40; P{y[+t7.7] w[+mC]=R87G07-GAL4.DBD}attP2
SS31466	Adult	Jim Truman	Truman	2	N	No	No	10.1101/2024.01.09.574419	Meissner; 2024	3027679	02A		GMR_41H07-x-VT026338	w[1118]; P{y[+t7.7] w[+mC]=R41H07-p65.AD}attP40; P{y[+t7.7] w[+mC]=VT026338-GAL4.DBD}attP2
SS31505	Adult	Masayoshi Ito	Rubin	1	N	No	Yes	10.1101/2024.01.09.574419	Meissner; 2024	3025152	ATL028		GMR_48G06-x-VT050157	w[1118]; P{y[+t7.7] w[+mC]=R48G06-p65.AD}attP40; P{y[+t7.7] w[+mC]=VT050157-GAL4.DBD}attP2
SS31522	Adult	Masayoshi Ito	Rubin	2	N	No	No	10.1101/2024.01.09.574419	Meissner; 2024	3031890	CRE093		GMR_89B06-x-GMR_49A06	w[1118]; P{y[+t7.7] w[+mC]=R89B06-p65.AD}attP40; P{y[+t7.7] w[+mC]=R49A06-GAL4.DBD}attP2
SS31523	Adult	Masayoshi Ito	Rubin	1	N	No	No	10.1101/2024.01.09.574419	Meissner; 2024	3025171	SMP474?, SMP475?		GMR_89B06-x-GMR_50B06	w[1118]; P{y[+t7.7] w[+mC]=R89B06-p65.AD}attP40; P{y[+t7.7] w[+mC]=R50B06-GAL4.DBD}attP2
SS31659	Adult	Kaiyu Wang	Dickson	2	N	No	No	10.1101/2024.01.09.574419	Meissner; 2024	3024979			VT063627-x-VT000772	w[1118]; P{y[+t7.7] w[+mC]=VT063627-p65.AD}attP40; P{y[+t7.7] w[+mC]=VT000772-GAL4.DBD}attP2
SS31662	Adult	Kaiyu Wang	Dickson	2	N	No	No	10.1101/2024.01.09.574419	Meissner; 2024	3024982	DN		VT024016-x-VT040348	w[1118]; P{y[+t7.7] w[+mC]=VT024016-p65.AD}attP40; P{y[+t7.7] w[+mC]=VT040348-GAL4.DBD}attP2/TM6B, Tb[1]
SS31664	Adult	Kaiyu Wang	Dickson	1	N	No	Yes	10.1101/2024.01.09.574419	Meissner; 2024	3024984			VT040542-x-VT008825	w[1118]; P{y[+t7.7] w[+mC]=VT040542-p65.AD}attP40; P{y[+t7.7] w[+mC]=VT008825-GAL4.DBD}attP2
SS31670	Adult	Kaiyu Wang	Dickson	1	N	No	Yes	10.1101/2024.01.09.574419	Meissner; 2024	3024990			VT063627-x-VT021842	w[1118]; P{y[+t7.7] w[+mC]=VT063627-p65.AD}attP40; P{y[+t7.7] w[+mC]=VT021842-GAL4.DBD}attP2
SS31694	Adult	Kaiyu Wang	Dickson	2	N	No	No	10.1101/2024.01.09.574419	Meissner; 2024	3025019			VT044842-x-VT014710	w[1118]; P{y[+t7.7] w[+mC]=VT044842-p65.AD}attP40; P{y[+t7.7] w[+mC]=VT014710-GAL4.DBD}attP2
SS31696	Adult	Kaiyu Wang	Dickson	1	N	No	No	10.1101/2024.01.09.574419	Meissner; 2024	3025057			GMR_54D12-x-VT063305	w[1118]; P{y[+t7.7] w[+mC]=R54D12-p65.AD}attP40; P{y[+t7.7] w[+mC]=VT063305-GAL4.DBD}attP2
SS31697	Adult	Kaiyu Wang	Dickson	1	N	No	Yes	10.1101/2024.01.09.574419	Meissner; 2024	3025022			VT063627-x-VT019074	w[1118]; P{y[+t7.7] w[+mC]=VT063627-p65.AD}attP40; P{y[+t7.7] w[+mC]=VT019074-GAL4.DBD}attP2
SS31699	Adult	Kaiyu Wang	Dickson	1	N	No	No	10.1101/2024.01.09.574419	Meissner; 2024	3025024			VT040542-x-VT057364	w[1118]; P{y[+t7.7] w[+mC]=VT040542-p65.AD}attP40; P{y[+t7.7] w[+mC]=VT057364-GAL4.DBD}attP2/TM6B, Tb[1]
SS31700	Adult	Kaiyu Wang	Dickson	2	N	No	No	10.1101/2024.01.09.574419	Meissner; 2024	3025025	DN		VT040348-x-GMR_26B10	w[1118]; P{y[+t7.7] w[+mC]=VT040348-p65.AD}attP40; P{y[+t7.7] w[+mC]=R26B10-GAL4.DBD}attP2
SS31701	Adult	Kaiyu Wang	Dickson	2	N	No	No	10.1101/2024.01.09.574419	Meissner; 2024	3025026	DN		VT040348-x-GMR_11H10	w[1118]; P{y[+t7.7] w[+mC]=VT040348-p65.AD}attP40; P{y[+t7.7] w[+mC]=R11H10-GAL4.DBD}attP2
SS31827	Adult	Masayoshi Ito	Rubin	1	Y	No	Yes	10.1101/2024.01.09.574419	Meissner; 2024	3025170			GMR_25G10-x-GMR_27H01	w[1118]; P{y[+t7.7] w[+mC]=R25G10-p65.AD}attP40; P{y[+t7.7] w[+mC]=R27H01-GAL4.DBD}attP2
SS31829	Adult	Masayoshi Ito	Rubin	1	N	No	Yes	10.1101/2024.01.09.574419	Meissner; 2024	3025186	LPN		GMR_26A08-x-GMR_65D05	w[1118]; P{y[+t7.7] w[+mC]=R26A08-p65.AD}attP40; P{y[+t7.7] w[+mC]=R65D05-GAL4.DBD}attP2
SS31864	Adult	Masayoshi Ito	Rubin	1	N	No	No	10.1101/2024.01.09.574419	Meissner; 2024	3030672	LAL013		GMR_83H09-x-GMR_37G12	w; 83H09-p65ADZp in attP40; 37G12-ZpGdbd in attP2
SS31872	Adult	Ryo Minegishi	Dickson	1	N	Yes	No	10.1101/2024.01.09.574419	Meissner; 2024	3028508	LUL163		VT043084-x-GMR_29G03	w[1118]; P{y[+t7.7] w[+mC]=VT043084-p65.AD}attP40; P{y[+t7.7] w[+mC]=R29G03-GAL4.DBD}attP2
SS31882	Adult	Ryo Minegishi	Dickson	2	N	No	No	10.1101/2024.01.09.574419	Meissner; 2024	3028565	SN_mixed		VT017745-x-VT049896	w[1118]; P{y[+t7.7] w[+mC]=VT017745-p65.AD}attP40; P{y[+t7.7] w[+mC]=VT049896-GAL4.DBD}attP2
SS31884	Adult	Ryo Minegishi	Dickson	1	N	Yes	No	10.1101/2024.01.09.574419	Meissner; 2024	3028574	SN_mixed		VT017745-x-VT029570	w[1118]; P{y[+t7.7] w[+mC]=VT017745-p65.AD}attP40; P{y[+t7.7] w[+mC]=VT029570-GAL4.DBD}attP2
SS31895	Adult	Ryo Minegishi	Dickson	1	N	No	No	10.1101/2024.01.09.574419	Meissner; 2024	3031602	SN_mixed		VT014604-x-VT017745	w[1118]; P{y[+t7.7] w[+mC]=VT014604-p65.AD}attP40; P{y[+t7.7] w[+mC]=VT017745-GAL4.DBD}attP2
SS31935	Adult	DI	DI	1	N	Yes	No	10.1101/2024.01.09.574419	Meissner; 2024	3025432	Power muscle motor neuron population		VT057058-x-GMR_11D09	w[1118]; P{y[+t7.7] w[+mC]=VT057058-p65.AD}attP40; P{y[+t7.7] w[+mC]=R11D09-GAL4.DBD}attP2
SS31986	Adult	DI	DI	2	N	No	No	10.1101/2024.01.09.574419	Meissner; 2024	3027312	n-cHIN, w-cHIN		GMR_18H04-x-VT032828	w[1118]; P{y[+t7.7] w[+mC]=R18H04-p65.AD}attP40; P{y[+t7.7] w[+mC]=VT032828-GAL4.DBD}attP2
SS31999	Adult	DI	DI	1	N	Yes	No	10.1101/2024.01.09.574419	Meissner; 2024	3025430	Power muscle motor neuron population		GMR_22A12-x-GMR_74D06	w[1118]; P{y[+t7.7] w[+mC]=R22A12-p65.AD}attP40; P{y[+t7.7] w[+mC]=R74D06-GAL4.DBD}attP2
SS32008	Adult	DI	DI	1	N	Yes	No	10.1101/2024.01.09.574419	Meissner; 2024	3025431	WN-IN cross		GMR_65H03-x-GMR_76H04	w[1118]; P{y[+t7.7] w[+mC]=R65H03-p65.AD}attP40; P{y[+t7.7] w[+mC]=R76H04-GAL4.DBD}attP2
SS32144	Adult	Masayoshi Ito	Rubin	1	N	No	No	10.1101/2024.01.09.574419	Meissner; 2024	3025182	SMP527		GMR_43E05-x-GMR_38H10	w[1118]; P{y[+t7.7] w[+mC]=R43E05-p65.AD}attP40; P{y[+t7.7] w[+mC]=R38H10-GAL4.DBD}attP2
SS32254	Adult	Gerry Rubin	Rubin	1	N	No	No	10.1101/2024.01.09.574419	Meissner; 2024	3027005	FB4O, P, Q, R, weak vDelta?		GMR_26H05-x-VT049923	w[1118]; P{y[+t7.7] w[+mC]=R26H05-p65.AD}attP40/CyO; P{y[+t7.7] w[+mC]=VT049923-GAL4.DBD}attP2
SS32300	Adult	Ryo Minegishi	Dickson	2	N	No	No	10.1101/2024.01.09.574419	Meissner; 2024	3028505	LUL89		VT049904-x-GMR_72E10	w[1118]; P{y[+t7.7] w[+mC]=VT049904-p65.AD}attP40; P{y[+t7.7] w[+mC]=R72E10-GAL4.DBD}attP2
SS32343	Adult	Ryo Minegishi	Dickson	2	N	No	No	10.1101/2024.01.09.574419	Meissner; 2024	3029437	LBL23		VT044519-x-VT050658	w[1118]; P{y[+t7.7] w[+mC]=VT044519-p65.AD}attP40; P{y[+t7.7] w[+mC]=VT050658-GAL4.DBD}attP2/TM6B, Tb[+]
SS32346	Adult	Ryo Minegishi	Dickson	2	N	No	No	10.1101/2024.01.09.574419	Meissner; 2024	3029454	LUL53		VT003849-x-VT037875	w[1118]; P{y[+t7.7] w[+mC]=VT003849-p65.AD}attP40; P{y[+t7.7] w[+mC]=VT037875-GAL4.DBD}attP2
SS32370	Adult	Ryo Minegishi	Dickson	2	N	No	No	10.1101/2024.01.09.574419	Meissner; 2024	3028598	LBL39		VT058381-x-GMR_89G01	w[1118]; P{y[+t7.7] w[+mC]=VT058381-p65.AD}attP40; P{y[+t7.7] w[+mC]=R89G01-GAL4.DBD}attP2
SS32427	Adult	Ryo Minegishi	Dickson	1	N	Yes	No	10.1101/2024.01.09.574419	Meissner; 2024	3028963	LUL35, LUL40		GMR_10B11-x-VT049923	w[1118]; P{y[+t7.7] w[+mC]=R10B11-p65.AD}attP40; P{y[+t7.7] w[+mC]=VT049923-GAL4.DBD}attP2
SS32454	Adult	Ryo Minegishi	Dickson	1	N	Yes	No	10.1101/2024.01.09.574419	Meissner; 2024	3028966	LBI39, LBI40, LBI41		GMR_35B12-x-VT044959	w[1118]; P{y[+t7.7] w[+mC]=R35B12-p65.AD}attP40/CyO, P{w[+mC]=2xTb[1]-RFP}CyO; P{y[+t7.7] w[+mC]=VT044959-GAL4.DBD}attP2
SS32504	Adult	Ryo Minegishi	Dickson	2	N	No	No	10.1101/2024.01.09.574419	Meissner; 2024	3028975	LBI56, LBI57		GMR_83A11-x-VT056360	w[1118]; P{y[+t7.7] w[+mC]=R83A11-p65.AD}attP40; P{y[+t7.7] w[+mC]=VT056360-GAL4.DBD}attP2/TM6B, Tb[1]
SS32525	Adult	Masayoshi Ito	Rubin	1	N	No	Yes	10.1101/2024.01.09.574419	Meissner; 2024	3025151	AVLP032		GMR_21F01-x-VT001599	w[1118]; P{y[+t7.7] w[+mC]=R21F01-p65.AD}attP40; P{y[+t7.7] w[+mC]=VT001599-GAL4.DBD}attP2
SS32548	Adult	Kaiyu Wang	Dickson	1	N	No	No	10.1101/2024.01.09.574419	Meissner; 2024	3025085			GMR_54D12-x-GMR_82E08	w[1118]; P{y[+t7.7] w[+mC]=R54D12-p65.AD}attP40; P{y[+t7.7] w[+mC]=R82E08-GAL4.DBD}attP2
SS32727	Adult	Ryo Minegishi	Dickson	1	N	No	No	10.1101/2024.01.09.574419	Meissner; 2024	3038305	5HT		VT022236-x-VT025926	w; VT022236-p65ADZp in attP40; VT025926-ZpGdbd in attP2
SS32768	Adult	Masayoshi Ito	Rubin	1	N	No	No	10.1101/2024.01.09.574419	Meissner; 2024	3025180	SMP328, SMP329, SMP330		GMR_50C03-x-GMR_71G01	w[1118]; P{y[+t7.7] w[+mC]=R50C03-p65.AD}attP40/CyO, P{w[+mC]=2xTb[1]-RFP}CyO; P{y[+t7.7] w[+mC]=R71G01-GAL4.DBD}attP2
SS32774	Adult	Masayoshi Ito	Rubin	1	N	No	No	10.1101/2024.01.09.574419	Meissner; 2024	3025181	SMP316_a?, SMP316_b?		GMR_70C11-x-GMR_71G01	w[1118]; P{y[+t7.7] w[+mC]=R70C11-p65.AD}attP40; P{y[+t7.7] w[+mC]=R71G01-GAL4.DBD}attP2
SS32791	Adult	Masayoshi Ito	Rubin	1	N	No	Yes	10.1101/2024.01.09.574419	Meissner; 2024	3025155	CL225?		GMR_51E06-x-VT027934	w[1118]; P{y[+t7.7] w[+mC]=R51E06-p65.AD}attP40/CyO, P{w[+mC]=2xTb[1]-RFP}CyO; P{y[+t7.7] w[+mC]=VT027934-GAL4.DBD}attP2
SS32792	Adult	Masayoshi Ito	Rubin	1	N	No	No	10.1101/2024.01.09.574419	Meissner; 2024	3025166			GMR_55B09-x-GMR_89B12	w[1118]; P{y[+t7.7] w[+mC]=R55B09-p65.AD}attP40/CyO, P{w[+mC]=2xTb[1]-RFP}CyO; P{y[+t7.7] w[+mC]=R89B12-GAL4.DBD}attP2
SS32832	Adult	Jens Goldammer	Rubin	2	N	No	No	10.1101/2024.01.09.574419	Meissner; 2024	3039305	PLP030		VT026342-x-GMR_35F03	w[1118]; P{y[+t7.7] w[+mC]=VT026342-p65.AD}attP40; P{y[+t7.7] w[+mC]=R35F03-GAL4.DBD}attP2
SS32986	Adult	Masayoshi Ito	Rubin	2	N	No	No	10.1101/2024.01.09.574419	Meissner; 2024	3025160		5813021922, 5813070017	VT044650-x-VT049128	w[1118]; P{y[+t7.7] w[+mC]=VT044650-p65.AD}attP40; P{y[+t7.7] w[+mC]=VT049128-GAL4.DBD}attP2
SS33272	Adult	Jens Goldammer	Rubin	1	N	No	Yes	10.1101/2024.01.09.574419	Meissner; 2024	3025652	PS203		VT012719-x-GMR_89A03	w[1118]; P{y[+t7.7] w[+mC]=VT012719-p65.AD}attP40; P{y[+t7.7] w[+mC]=R89A03-GAL4.DBD}attP2
SS33318	Adult	Masayoshi Ito	Rubin	1	N	No	Yes	10.1101/2024.01.09.574419	Meissner; 2024	3025507	CL005?, CL006?		GMR_28E01-x-GMR_28F07	w[1118]; P{y[+t7.7] w[+mC]=R28E01-p65.AD}attP40/CyO, P{2xTb[1]-RFP}CyO; P{y[+t7.7] w[+mC]=R28F07-GAL4.DBD}attP2
SS33368	Adult	Ryo Minegishi	Dickson	1	N	Yes	No	10.1101/2024.01.09.574419	Meissner; 2024	3029179	LUL31		GMR_37G11-x-VT021368	w[1118]; P{y[+t7.7] w[+mC]=R37G11-p65.AD}attP40; P{y[+t7.7] w[+mC]=VT021368-GAL4.DBD}attP2
SS33392	Adult	Jim Truman	Truman	2	N	No	No	10.1101/2024.01.09.574419	Meissner; 2024	3027689	08Bc		GMR_12C07-x-GMR_92B02	w[1118]; P{y[+t7.7] w[+mC]=R12C07-p65.AD}attP40; P{y[+t7.7] w[+mC]=R92B02-GAL4.DBD}attP2/TM6B, Tb[1]
SS33445	Adult	Jim Truman	Truman	2	N	No	No	10.1101/2024.01.09.574419	Meissner; 2024	3027680	18B		VT065320-x-VT046785	w[1118]; P{y[+t7.7] w[+mC]=VT065320-p65.AD}attP40; P{y[+t7.7] w[+mC]=VT046785-GAL4.DBD}attP2/TM6B, Tb[+]
SS33467	Adult	Ryo Minegishi	Dickson	1	N	No	No	10.1101/2024.01.09.574419	Meissner; 2024	3028988	LBI2, LBI6		VT001595-x-GMR_33H10	w[1118]; P{y[+t7.7] w[+mC]=VT001595-p65.AD}attP40; P{y[+t7.7] w[+mC]=R33H10-GAL4.DBD}attP2/TM6B, Tb[1]
SS33496	Adult	Ryo Minegishi	Dickson	1	N	Yes	No	10.1101/2024.01.09.574419	Meissner; 2024	3028993	LBL49		VT026839-x-VT000254	w[1118]; P{y[+t7.7] w[+mC]=VT026839-p65.AD}attP40; P{y[+t7.7] w[+mC]=VT000254-GAL4.DBD}attP2
SS33693	Adult	Jens Goldammer	Rubin	1	N	No	Yes	10.1101/2024.01.09.574419	Meissner; 2024	3025662	OCG08		VT037554-x-GMR_82F01	w[1118]; P{y[+t7.7] w[+mC]=VT037554-p65.AD}attP40; P{y[+t7.7] w[+mC]=R82F01-GAL4.DBD}attP2
SS33694	Adult	Jens Goldammer	Rubin	1	N	No	Yes	10.1101/2024.01.09.574419	Meissner; 2024	3025654	OCG07, OCG08		VT037554-x-GMR_89A03	w[1118]; P{y[+t7.7] w[+mC]=VT037554-p65.AD}attP40; P{y[+t7.7] w[+mC]=R89A03-GAL4.DBD}attP2
SS33707	Adult	Jens Goldammer	Rubin	1	N	No	No	10.1101/2024.01.09.574419	Meissner; 2024	3025639	OCG07, OCG08		VT037553-x-VT057298	w[1118]; P{y[+t7.7] w[+mC]=VT037553-p65.AD}attP40; P{y[+t7.7] w[+mC]=VT057298-GAL4.DBD}attP2
SS33738	Adult	Jens Goldammer	Rubin	1	N	No	Yes	10.1101/2024.01.09.574419	Meissner; 2024	3025663	OCG08		GMR_80A01-x-GMR_82F01	w[1118]; P{y[+t7.7] w[+mC]=R80A01-p65.AD}attP40; P{y[+t7.7] w[+mC]=R82F01-GAL4.DBD}attP2
SS33739	Adult	Jens Goldammer	Rubin	1	N	No	Yes	10.1101/2024.01.09.574419	Meissner; 2024	3025655	OCG07, OCG08		GMR_80A01-x-GMR_89A03	w[1118]; P{y[+t7.7] w[+mC]=R80A01-p65.AD}attP40; P{y[+t7.7] w[+mC]=R89A03-GAL4.DBD}attP2
SS33872	Adult	Barry Dickson	Dickson	2	N	No	No	10.1101/2024.01.09.574419	Meissner; 2024	3025588			GMR_94D12-x-GMR_72H10	w[1118]; P{y[+t7.7] w[+mC]=R94D12-p65.AD}attP40/CyO, P{w[+mC]=2xTb[1]-RFP}CyO; P{y[+t7.7] w[+mC]=R72H10-GAL4.DBD}attP2
SS33983	Adult	Aljoscha Nern	Rubin	1	N	No	No	10.1101/2024.01.09.574419	Meissner; 2024	3025525	PLP163		VT010661-x-VT046828	w[1118]; P{y[+t7.7] w[+mC]=VT010661-p65.AD}attP40; P{y[+t7.7] w[+mC]=VT046828-GAL4.DBD}attP2
SS34154	Adult	Masayoshi Ito	Rubin	1	Y	No	No	10.1101/2024.01.09.574419	Meissner; 2024	3025499	CL123		VT014959-x-GMR_47H07	w[1118]; P{y[+t7.7] w[+mC]=VT014959-p65.AD}attP40; P{y[+t7.7] w[+mC]=R47H07-GAL4.DBD}attP2
SS34167	Adult	Masayoshi Ito	Rubin	1	N	No	No	10.1101/2024.01.09.574419	Meissner; 2024	3025503	IB053, IB054,IB055		GMR_19F01-x-GMR_70C09	w[1118]; P{y[+t7.7] w[+mC]=R19F01-p65.AD}attP40; P{y[+t7.7] w[+mC]=R70C09-GAL4.DBD}attP2
SS34190	Adult	Masayoshi Ito	Rubin	1	N	No	Yes	10.1101/2024.01.09.574419	Meissner; 2024	3025509	LHPV4b1_a?, LHPV4b1_b?		GMR_86F02-x-GMR_52G05	w[1118]; P{y[+t7.7] w[+mC]=R86F02-p65.AD}attP40; P{y[+t7.7] w[+mC]=R52G05-GAL4.DBD}attP2
SS34478	Adult	Ryo Minegishi	Dickson	2	N	No	No	10.1101/2024.01.09.574419	Meissner; 2024	3029436	LBL23		VT050238-x-VT050658	w[1118]; P{y[+t7.7] w[+mC]=VT050238-p65.AD}attP40; P{y[+t7.7] w[+mC]=VT050658-GAL4.DBD}attP2
SS34537	Adult	Ryo Minegishi	Dickson	2	N	No	No	10.1101/2024.01.09.574419	Meissner; 2024	3028608	LBA44, LBI51		VT036302-x-GMR_66B07	w[1118]; P{y[+t7.7] w[+mC]=VT036302-p65.AD}attP40/CyO, P{w[+mC]=2xTb[1]-RFP}CyO; P{y[+t7.7] w[+mC]=R66B07-GAL4.DBD}attP2
SS34547	Adult	Ryo Minegishi	Dickson	2	N	No	No	10.1101/2024.01.09.574419	Meissner; 2024	3028576	LBL39		VT058381-x-VT020829	w[1118]; P{y[+t7.7] w[+mC]=VT058381-p65.AD}attP40; P{y[+t7.7] w[+mC]=VT020829-GAL4.DBD}attP2
SS34614	Adult	Ryo Minegishi	Dickson	1	N	Yes	No	10.1101/2024.01.09.574419	Meissner; 2024	3029110	LBL6, LUL28, LUL29, LUL33		GMR_18G08-x-GMR_21D06	w[1118]; P{y[+t7.7] w[+mC]=R18G08-p65.AD}attP40/CyO, P{w[+mC]=2xTb[1]-RFP}CyO; P{y[+t7.7] w[+mC]=R21D06-GAL4.DBD}attP2
SS34621	Adult	Ryo Minegishi	Dickson	2	N	No	No	10.1101/2024.01.09.574419	Meissner; 2024	3029017	LUL39, LUL41		GMR_20G06-x-VT015971	w[1118]; P{y[+t7.7] w[+mC]=R20G06-p65.AD}attP40; P{y[+t7.7] w[+mC]=VT015971-GAL4.DBD}attP2
SS34663	Adult	Ryo Minegishi	Dickson	2	N	No	No	10.1101/2024.01.09.574419	Meissner; 2024	3029175	LBA9, LBI16, LBI20		GMR_49G12-x-VT029592	w[1118]; P{y[+t7.7] w[+mC]=R49G12-p65.AD}attP40; P{y[+t7.7] w[+mC]=VT029592-GAL4.DBD}attP2
SS34668	Adult	Ryo Minegishi	Dickson	1	N	Yes	No	10.1101/2024.01.09.574419	Meissner; 2024	3029025	LUL15, LUL19		GMR_54H10-x-VT032228	w[1118]; P{y[+t7.7] w[+mC]=R54H10-p65.AD}attP40; P{y[+t7.7] w[+mC]=VT032228-GAL4.DBD}attP2
SS34687	Adult	Ryo Minegishi	Dickson	1	N	Yes	No	10.1101/2024.01.09.574419	Meissner; 2024	3029027	LUL164, LUL165		GMR_69H11-x-GMR_92A10	w[1118]; P{y[+t7.7] w[+mC]=R69H11-p65.AD}attP40/CyO; P{y[+t7.7] w[+mC]=R92A10-GAL4.DBD}attP2
SS34692	Adult	Kaiyu Wang	Dickson	1	N	Yes	No	10.1101/2024.01.09.574419	Meissner; 2024	3027855	VNC_LN		GMR_76E09-x-GMR_26H12	w[1118]; P{y[+t7.7] w[+mC]=R76E09-p65.AD}attP40/CyO; P{y[+t7.7] w[+mC]=R26H12-GAL4.DBD}attP2/TM6B, Tb[1]
SS34701	Adult	Ryo Minegishi	Dickson	1	N	No	No	10.1101/2024.01.09.574419	Meissner; 2024	3029029	LBI14		GMR_91B01-x-VT002063	w; 91B01-p65ADZp in attP40/CyO; VT002063-ZpGDBD in attP2
SS35138	Adult	Masayoshi Ito	Rubin	1	N	No	Yes	10.1101/2024.01.09.574419	Meissner; 2024	3025504	OA-ASM2		GMR_68A10-x-GMR_25B12	w[1118]; P{y[+t7.7] w[+mC]=R68A10-p65.AD}attP40/CyO, P{w[+mC]=2xTb[1]-RFP}CyO; P{y[+t7.7] w[+mC]=R25B12-GAL4.DBD}attP2
SS35196	Adult	Jens Goldammer	Rubin	1	N	No	Yes	10.1101/2024.01.09.574419	Meissner; 2024	3025621	AVLP588, AVLP589		GMR_89A02-x-VT045575	w[1118]; P{y[+t7.7] w[+mC]=R89A02-p65.AD}attP40; P{y[+t7.7] w[+mC]=VT045575-GAL4.DBD}attP2
SS35339	Adult	Masayoshi Ito	Rubin	1	N	No	No	10.1101/2024.01.09.574419	Meissner; 2024	3025845	LHAV4e1_a?, LHAV4e1_b?		GMR_75H08-x-VT057054	w[1118]; P{y[+t7.7] w[+mC]=R75H08-p65.AD}attP40; P{y[+t7.7] w[+mC]=VT057054-GAL4.DBD}attP2
SS35352	Adult	Masayoshi Ito	Rubin	1	N	No	Yes	10.1101/2024.01.09.574419	Meissner; 2024	3025857	CL194		GMR_23F02-x-GMR_18C07	w[1118]; P{y[+t7.7] w[+mC]=R23F02-p65.AD}attP40; P{y[+t7.7] w[+mC]=R18C07-GAL4.DBD}attP2
SS35366	Adult	Masayoshi Ito	Rubin	1	N	No	No	10.1101/2024.01.09.574419	Meissner; 2024	3025834	SLP435		VT016966-x-VT050228	w[1118]; P{y[+t7.7] w[+mC]=VT016966-p65.AD}attP40; P{y[+t7.7] w[+mC]=VT050228-GAL4.DBD}attP2
SS35442	Adult	Claire McKellar	Dickson	1	N	No	No	10.1101/2024.01.09.574419	Meissner; 2024	3031437			GMR_91F05-x-GMR_20G01	w[1118]; P{y[+t7.7] w[+mC]=R91F05-p65.AD}attP40/CyO, P{w[+mC]=2xTb[1]-RFP}CyO; P{y[+t7.7] w[+mC]=R20G01-GAL4.DBD}attP2
SS35605	Adult	Ryo Minegishi	Dickson	2	N	No	No	10.1101/2024.01.09.574419	Meissner; 2024	3029078	LUL139, LUL140, LUL163		VT043138-x-VT029359	w[1118]; P{y[+t7.7] w[+mC]=VT043138-p65.AD}attP40; P{y[+t7.7] w[+mC]=VT029359-GAL4.DBD}attP2
SS35640	Adult	Masayoshi Ito	Rubin	2	N	No	No	10.1101/2024.01.09.574419	Meissner; 2024	3025848	NPFL1-I		VT026999-x-GMR_11C01	w[1118]; P{y[+t7.7] w[+mC]=VT026999-p65.AD}attP40; P{y[+t7.7] w[+mC]=R11C01-GAL4.DBD}attP2
SS35659	Adult	Masayoshi Ito	Rubin	1	N	No	Yes	10.1101/2024.01.09.574419	Meissner; 2024	3025859			GMR_23E07-x-GMR_53A09	w[1118]; P{y[+t7.7] w[+mC]=R23E07-p65.AD}attP40; P{y[+t7.7] w[+mC]=R53A09-GAL4.DBD}attP2/TM6B, Tb[1]
SS35672	Adult	Kaiyu Wang	Dickson	2	N	No	No	10.1101/2024.01.09.574419	Meissner; 2024	3027856			VT042834-x-VT046005	w[1118]; P{y[+t7.7] w[+mC]=VT042834-p65.AD}attP40/CyO; P{y[+t7.7] w[+mC]=VT046005-GAL4.DBD}attP2
SS35674	Adult	Masayoshi Ito	Rubin	1	N	No	Yes	10.1101/2024.01.09.574419	Meissner; 2024	3025831	CL145		GMR_37G11-x-VT000624	w[1118]; P{y[+t7.7] w[+mC]=R37G11-p65.AD}attP40; P{y[+t7.7] w[+mC]=VT000624-GAL4.DBD}attP2
SS35837	Adult	Jens Goldammer	Rubin	2	N	No	No	10.1101/2024.01.09.574419	Meissner; 2024	3025634	PS263		VT040042-x-VT058723	w[1118]; P{y[+t7.7] w[+mC]=VT040042-p65.AD}attP40/CyO, P{w[+mC]=2xTb[1]-RFP}CyO; P{y[+t7.7] w[+mC]=VT058723-GAL4.DBD}attP2
SS35873	Adult	Jens Goldammer	Rubin	1	N	No	No	10.1101/2024.01.09.574419	Meissner; 2024	3025661	PPM1201		VT045642-x-GMR_49C08	w[1118]; P{y[+t7.7] w[+mC]=VT045642-p65.AD}attP40; P{y[+t7.7] w[+mC]=R49C08-GAL4.DBD}attP2
SS35894	Adult	Jens Goldammer	Rubin	1	N	No	No	10.1101/2024.01.09.574419	Meissner; 2024	3025629	WED164		GMR_75H08-x-VT044326	w[1118]; P{y[+t7.7] w[+mC]=R75H08-p65.AD}attP40; P{y[+t7.7] w[+mC]=VT044326-GAL4.DBD}attP2
SS35902	Adult	Masayoshi Ito	Rubin	1	N	No	No	10.1101/2024.01.09.574419	Meissner; 2024	3025864	VES060, VES061	739567785	VT014340-x-GMR_68A08	w[1118]; P{y[+t7.7] w[+mC]=VT014340-p65.AD}attP40; P{y[+t7.7] w[+mC]=R68A08-GAL4.DBD}attP2
SS35906	Adult	Masayoshi Ito	Rubin	2	N	No	No	10.1101/2024.01.09.574419	Meissner; 2024	3026639	CRE063, CRE064		GMR_32F06-x-GMR_83B05	w[1118]; P{y[+t7.7] w[+mC]=R32F06-p65.AD}attP40; P{y[+t7.7] w[+mC]=R83B05-GAL4.DBD}attP2
SS35947	Adult	Claire McKellar	Dickson	1	N	No	No	10.1101/2024.01.09.574419	Meissner; 2024	3031459			VT044969-x-VT012719	w[1118]; P{y[+t7.7] w[+mC]=VT044969-p65.AD}attP40/CyO; P{y[+t7.7] w[+mC]=VT012719-GAL4.DBD}attP2
SS35957	Adult	Jens Goldammer	Rubin	2	N	No	No	10.1101/2024.01.09.574419	Meissner; 2024	3039233	unknown GNG type 3: 5813000371?		GMR_34E09-x-GMR_80B11	w[1118]; P{y[+t7.7] w[+mC]=R34E09-p65.AD}attP40; P{y[+t7.7] w[+mC]=R80B11-GAL4.DBD}attP2/T(2;3)B3, CyO: TM6B, Tb[1]
SS35958	Adult	Masayoshi Ito	Rubin	1	N	No	Yes	10.1101/2024.01.09.574419	Meissner; 2024	3025853			GMR_34E09-x-GMR_95C12	w[1118]; P{y[+t7.7] w[+mC]=R34E09-p65.AD}attP40; P{y[+t7.7] w[+mC]=R95C12-GAL4.DBD}attP2
SS35966	Adult	Masayoshi Ito	Rubin	1	N	No	Yes	10.1101/2024.01.09.574419	Meissner; 2024	3025846	SMP029		GMR_16F08-x-VT024647	w[1118]; P{y[+t7.7] w[+mC]=R16F08-p65.AD}attP40; P{y[+t7.7] w[+mC]=VT024647-GAL4.DBD}attP2
SS35987	Adult	Claire McKellar	Dickson	2	N	No	No	10.1101/2024.01.09.574419	Meissner; 2024	3031460			VT048645-x-GMR_76E07	w[1118]; P{y[+t7.7] w[+mC]=VT048645-p65.AD}attP40/CyO; P{y[+t7.7] w[+mC]=R76E07-GAL4.DBD}attP2
SS36063	Adult	Jim Truman	Truman	2	N	No	No	10.1101/2024.01.09.574419	Meissner; 2024	3027681	13A		VT040724-x-VT040038	w[1118]; P{y[+t7.7] w[+mC]=VT040724-p65.AD}attP40; P{y[+t7.7] w[+mC]=VT040038-GAL4.DBD}attP2/TM6B, Tb[1]
SS36095	Adult	Ryo Minegishi	Dickson	2	N	No	No	10.1101/2024.01.09.574419	Meissner; 2024	3030759	LBI10		GMR_49C08-x-VT028144	w[1118]; P{y[+t7.7] w[+mC]=R49C08-p65.AD}attP40; P{y[+t7.7] w[+mC]=VT028144-GAL4.DBD}attP2
SS36115	Adult	Ryo Minegishi	Dickson	2	N	No	No	10.1101/2024.01.09.574419	Meissner; 2024	3028599	LBI15, LBI16		VT037810-x-GMR_13E04	w[1118]; P{y[+t7.7] w[+mC]=VT037810-p65.AD}attP40; P{y[+t7.7] w[+mC]=R13E04-GAL4.DBD}attP2
SS36116	Adult	Jim Truman	Truman	2	N	No	No	10.1101/2024.01.09.574419	Meissner; 2024	3027686	11A		VT044959-x-GMR_85H06	w[1118]; P{y[+t7.7] w[+mC]=VT044959-p65.AD}attP40; P{y[+t7.7] w[+mC]=R85H06-GAL4.DBD}attP2
SS36134	Adult	Ryo Minegishi	Dickson	1	N	Yes	No	10.1101/2024.01.09.574419	Meissner; 2024	3029230	LBI39, LBI41		GMR_72B05-x-VT044959	w[1118]; P{y[+t7.7] w[+mC]=R72B05-p65.AD}attP40; P{y[+t7.7] w[+mC]=VT044959-GAL4.DBD}attP2
SS36152	Adult	Ryo Minegishi	Dickson	1	N	Yes	No	10.1101/2024.01.09.574419	Meissner; 2024	3030419	LBL46, LBL47		VT015787-x-GMR_38D07	w[1118]; P{y[+t7.7] w[+mC]=VT015787-p65.AD}attP40; P{y[+t7.7] w[+mC]=R38D07-GAL4.DBD}attP2/TM6B, Tb[1]
SS36162	Adult	Ryo Minegishi	Dickson	2	N	No	No	10.1101/2024.01.09.574419	Meissner; 2024	3028604	SN_mixed		VT054815-x-GMR_79F08	w[1118]; P{y[+t7.7] w[+mC]=VT054815-p65.AD}attP40; P{y[+t7.7] w[+mC]=R79F08-GAL4.DBD}attP2
SS36542	Adult	Claire McKellar	Dickson	1	N	No	Yes	10.1101/2024.01.09.574419	Meissner; 2024	3031466			GMR_49C08-x-VT039505	w[1118]; P{y[+t7.7] w[+mC]=R49C08-p65.AD}attP40/CyO; P{y[+t7.7] w[+mC]=VT039505-GAL4.DBD}attP2
SS36583	Adult	Masayoshi Ito	Rubin	1	N	No	No	10.1101/2024.01.09.574419	Meissner; 2024	3025956			GMR_80C08-x-GMR_76G11	w[1118]; P{y[+t7.7] w[+mC]=R80C08-p65.AD}attP40; P{y[+t7.7] w[+mC]=R76G11-GAL4.DBD}attP2
SS36585	Adult	Masayoshi Ito	Rubin	1	N	No	No	10.1101/2024.01.09.574419	Meissner; 2024	3025948			GMR_92B11-x-VT020739	w[1118]; P{y[+t7.7] w[+mC]=R92B11-p65.AD}attP40/CyO, P{w[+mC]=2xTb[1]-RFP}CyO; P{y[+t7.7] w[+mC]=VT020739-GAL4.DBD}attP2
SS36948	Adult	Claire McKellar	Dickson	1	N	No	No	10.1101/2024.01.09.574419	Meissner; 2024	3031468			GMR_52E12-x-VT016116	w[1118]; P{y[+t7.7] w[+mC]=R52E12-p65.AD}attP40/CyO; P{y[+t7.7] w[+mC]=VT016116-GAL4.DBD}attP2
SS36959	Adult	Claire McKellar	Dickson	1	N	No	Yes	10.1101/2024.01.09.574419	Meissner; 2024	3031469			GMR_11B07-x-VT055068	w[1118]; P{y[+t7.7] w[+mC]=R11B07-p65.AD}JK22C; P{y[+t7.7] w[+mC]=VT055068-GAL4.DBD}attP2/TM6B, Tb[1]
SS36986	Adult	Claire McKellar	Dickson	1	N	No	No	10.1101/2024.01.09.574419	Meissner; 2024	3031476			GMR_72G03-x-GMR_82E12	w[1118]; P{y[+t7.7] w[+mC]=R72G03-p65.AD}attP40; P{y[+t7.7] w[+mC]=R82E12-GAL4.DBD}attP2
SS37026	Adult	Jens Goldammer	Rubin	2	N	No	No	10.1101/2024.01.09.574419	Meissner; 2024	3026586		1251511957, 1315382485	VT019758-x-GMR_31F10	w[1118]; P{y[+t7.7] w[+mC]=VT019758-p65.AD}attP40; P{y[+t7.7] w[+mC]=R31F10-GAL4.DBD}attP2
SS37049	Adult	Masayoshi Ito	Rubin	1	N	No	No	10.1101/2024.01.09.574419	Meissner; 2024	3025955	SMP001		GMR_10F08-x-GMR_73H08	w[1118]; P{y[+t7.7] w[+mC]=R10F08-p65.AD}attP40; P{y[+t7.7] w[+mC]=R73H08-GAL4.DBD}attP2
SS37052	Adult	Masayoshi Ito	Rubin	1	N	No	No	10.1101/2024.01.09.574419	Meissner; 2024	3025961	LAL007		GMR_15G09-x-GMR_23G11	w[1118]; P{y[+t7.7] w[+mC]=R15G09-p65.AD}attP40/CyO, P{w[+mC]=2xTb[1]-RFP}CyO; P{y[+t7.7] w[+mC]=R23G11-GAL4.DBD}attP2/TM6B, Tb[1]
SS37057	Adult	Masayoshi Ito	Rubin	1	N	No	No	10.1101/2024.01.09.574419	Meissner; 2024	3025957	SLP389		GMR_22H01-x-GMR_37G12	w[1118]; P{y[+t7.7] w[+mC]=R22H01-p65.AD}attP40; P{y[+t7.7] w[+mC]=R37G12-GAL4.DBD}attP2
SS37072	Adult	Masayoshi Ito	Rubin	1	N	No	No	10.1101/2024.01.09.574419	Meissner; 2024	3025958	AVLP590		GMR_49A01-x-GMR_39H12	w[1118]; P{y[+t7.7] w[+mC]=R49A01-p65.AD}attP40; P{y[+t7.7] w[+mC]=R39H12-GAL4.DBD}attP2
SS37419	Adult	Jens Goldammer	Rubin	1	N	No	Yes	10.1101/2024.01.09.574419	Meissner; 2024	3026565	AVLP584		VT008671-x-GMR_51H05	w[1118]; P{y[+t7.7] w[+mC]=VT008671-p65.AD}attP40/CyO, P{w[+mC]=2xTb[1]-RFP}CyO; P{y[+t7.7] w[+mC]=R51H05-GAL4.DBD}attP2
SS37632	Adult	Ryo Minegishi	Dickson	1	N	Yes	No	10.1101/2024.01.09.574419	Meissner; 2024	3029076	LBL49		GMR_11H10-x-VT015786	w[1118]; P{y[+t7.7] w[+mC]=R11H10-p65.AD}attP40; P{y[+t7.7] w[+mC]=VT015786-GAL4.DBD}attP2/TM6B, Tb[+]
SS37633	Adult	Ryo Minegishi	Dickson	1	N	Yes	No	10.1101/2024.01.09.574419	Meissner; 2024	3029090	LBL48, LBL49		GMR_11H10-x-VT012318	w[1118]; P{y[+t7.7] w[+mC]=R11H10-p65.AD}attP40; P{y[+t7.7] w[+mC]=VT012318-GAL4.DBD}attP2/TM6B, Tb[1]
SS37641	Adult	Jim Truman	Truman	1	N	Yes	No	10.1101/2024.01.09.574419	Meissner; 2024	3027657	12A		VT064563-x-VT009094	w[1118]; P{y[+t7.7] w[+mC]=VT064563-p65.AD}attP40; P{y[+t7.7] w[+mC]=VT009094-GAL4.DBD}attP2
SS37648	Adult	Ryo Minegishi	Dickson	1	N	Yes	No	10.1101/2024.01.09.574419	Meissner; 2024	3029486	LBL14		VT014336-x-GMR_23E04	w[1118]; P{y[+t7.7] w[+mC]=VT014336-p65.AD}attP40; P{y[+t7.7] w[+mC]=R23E04-GAL4.DBD}attP2
SS37659	Adult	Ryo Minegishi	Dickson	2	N	No	No	10.1101/2024.01.09.574419	Meissner; 2024	3029430	LBL26, LBL27, LBL28, LUL106, LUL107, LUL108		VT040346-x-VT002408	w[1118]; P{y[+t7.7] w[+mC]=VT040346-p65.AD}attP40; P{y[+t7.7] w[+mC]=VT002408-GAL4.DBD}attP2
SS37671	Adult	Ryo Minegishi	Dickson	1	N	Yes	No	10.1101/2024.01.09.574419	Meissner; 2024	3028643	LUL17		VT002050-x-VT048874	w[1118]; P{y[+t7.7] w[+mC]=VT002050-p65.AD}attP40; P{y[+t7.7] w[+mC]=VT048874-GAL4.DBD}attP2/TM6B, Tb[1]
SS37685	Adult	Jim Truman	Truman	1	N	No	No	10.1101/2024.01.09.574419	Meissner; 2024	3027660	06A		GMR_86H02-x-VT014709	w[1118]; P{y[+t7.7] w[+mC]=R86H02-p65.AD}attP40; P{y[+t7.7] w[+mC]=VT014709-GAL4.DBD}attP2/TM6B, Tb[1]
SS37714	Adult	Jens Goldammer	Rubin	1	N	No	Yes	10.1101/2024.01.09.574419	Meissner; 2024	3027808	IB060		VT031392-x-GMR_13E12	w[1118]; P{y[+t7.7] w[+mC]=VT031392-p65.AD}attP40; P{y[+t7.7] w[+mC]=R13E12-GAL4.DBD}attP2
SS37773	Adult	Gabriella Sterne	Dickson	1	N	No	No	10.1101/2024.01.09.574419	Meissner; 2024	3044392	trito		VT043788-x-GMR_46A08	w[1118]; P{y[+t7.7] w[+mC]=VT043788-p65.AD}attP40/CyO; P{y[+t7.7] w[+mC]=R46A08-GAL4.DBD}attP2
SS37873	Adult	Masayoshi Ito	Rubin	1	N	No	No	10.1101/2024.01.09.574419	Meissner; 2024	3025933		509945954	GMR_29G03-x-VT045663	w[1118]; P{y[+t7.7] w[+mC]=R29G03-p65.AD}attP40; P{y[+t7.7] w[+mC]=VT045663-GAL4.DBD}attP2
SS38007	Adult	Jim Truman	Truman	1	N	Yes	No	10.1101/2024.01.09.574419	Meissner; 2024	3027676	17A		GMR_22H01-x-VT018838	w[1118]; P{y[+t7.7] w[+mC]=R22H01-p65.AD}attP40/CyO, P{w[+mC]=2xTb[1]-RFP}CyO; P{y[+t7.7] w[+mC]=VT018838-GAL4.DBD}attP2
SS38013	Adult	Ryo Minegishi	Dickson	1	N	Yes	No	10.1101/2024.01.09.574419	Meissner; 2024	3029379	LUL4		GMR_85A07-x-GMR_26E03	w[1118]; P{y[+t7.7] w[+mC]=R85A07-p65.AD}attP40; P{y[+t7.7] w[+mC]=R26E03-GAL4.DBD}attP2
SS38021	Adult	Ryo Minegishi	Dickson	2	N	No	No	10.1101/2024.01.09.574419	Meissner; 2024	3029373	LUL3, LUL5, LUL7		GMR_9D11-x-GMR_85A07	w[1118]; P{y[+t7.7] w[+mC]=R9D11-p65.AD}attP40/CyO, P{w[+mC]=2xTb[1]-RFP}CyO; P{y[+t7.7] w[+mC]=R85A07-GAL4.DBD}attP2/TM6B, Tb[1]
SS38176	Adult	Masayoshi Ito	Rubin	2	N	No	No	10.1101/2024.01.09.574419	Meissner; 2024	3025932	SMP092		VT043158-x-VT008170	w[1118]; P{y[+t7.7] w[+mC]=VT043158-p65.AD}attP40; P{y[+t7.7] w[+mC]=VT008170-GAL4.DBD}attP2
SS38189	Adult	Masayoshi Ito	Rubin	1	N	No	No	10.1101/2024.01.09.574419	Meissner; 2024	3025936	SLP457		GMR_14H09-x-VT036268	w[1118]; P{y[+t7.7] w[+mC]=R14H09-p65.AD}attP40; P{y[+t7.7] w[+mC]=VT036268-GAL4.DBD}attP2
SS38214	Adult	Masayoshi Ito	Rubin	1	N	No	No	10.1101/2024.01.09.574419	Meissner; 2024	3025950			VT025916-x-VT009084	w[1118]; P{y[+t7.7] w[+mC]=VT025916-p65.AD}attP40/CyO, P{w[+mC]=2xTb[1]-RFP}CyO; P{y[+t7.7] w[+mC]=VT009084-GAL4.DBD}attP2/TM6B, Tb[1]
SS38222	Adult	Jens Goldammer	Rubin	1	N	No	No	10.1101/2024.01.09.574419	Meissner; 2024	3039307	CL208		VT027168-x-GMR_61H01	w[1118]; P{y[+t7.7] w[+mC]=VT027168-p65.AD}attP40/CyO; P{y[+t7.7] w[+mC]=R61H01-GAL4.DBD}attP2/TM6B, Tb[1]
SS38223	Adult	Jens Goldammer	Rubin	1	N	No	Yes	10.1101/2024.01.09.574419	Meissner; 2024	3027797	SMP547		VT050229-x-GMR_50B06	w[1118]; P{y[+t7.7] w[+mC]=VT050229-p65.AD}attP40; P{y[+t7.7] w[+mC]=R50B06-GAL4.DBD}attP2
SS38360	Adult	Kaiyu Wang	Dickson	2	Y	No	No	10.1101/2024.01.09.574419	Meissner; 2024	3026781			VT005105-x-VT057364	w[1118]; P{y[+t7.7] w[+mC]=VT005105-p65.AD}attP40; P{y[+t7.7] w[+mC]=VT057364-GAL4.DBD}attP2/TM6B, Tb[1]
SS38361	Adult	Kaiyu Wang	Dickson	1	N	No	No	10.1101/2024.01.09.574419	Meissner; 2024	3027858	VNC		VT005105-x-VT043653	w[1118]; P{y[+t7.7] w[+mC]=VT005105-p65.AD}attP40; P{y[+t7.7] w[+mC]=VT043653-GAL4.DBD}attP2
SS38514	Adult	Jens Goldammer	Rubin	1	N	No	No	10.1101/2024.01.09.574419	Meissner; 2024	3039562	PS145, PS150, PS151, PS152?, PS143, PS149		VT041887-x-GMR_45F03	w[1118]; P{y[+t7.7] w[+mC]=VT041887-p65.AD}attP40; P{y[+t7.7] w[+mC]=R45F03-GAL4.DBD}attP2
SS38644	Adult	Ryo Minegishi	Dickson	1	N	Yes	No	10.1101/2024.01.09.574419	Meissner; 2024	3028478	LUI5		VT015786-x-VT063303	w[1118]; P{y[+t7.7] w[+mC]=VT015786-p65.AD}attP40; P{y[+t7.7] w[+mC]=VT063303-GAL4.DBD}attP2/TM6B, Tb[+]
SS38723	Adult	Ryo Minegishi	Dickson	1	N	Yes	No	10.1101/2024.01.09.574419	Meissner; 2024	3028603	LUL29, LUL31		VT037875-x-GMR_37G11	w[1118]; P{y[+t7.7] w[+mC]=VT037875-p65.AD}attP40; P{y[+t7.7] w[+mC]=R37G11-GAL4.DBD}attP2
SS38727	Adult	Ryo Minegishi	Dickson	2	N	No	No	10.1101/2024.01.09.574419	Meissner; 2024	3028554	LBL37, LUL152		VT039350-x-VT008473	w[1118]; P{y[+t7.7] w[+mC]=VT039350-p65.AD}attP40; P{y[+t7.7] w[+mC]=VT008473-GAL4.DBD}attP2
SS38746	Adult	Ryo Minegishi	Dickson	2	N	No	No	10.1101/2024.01.09.574419	Meissner; 2024	3029072	SN_mixed		VT058688-x-VT050234	w[1118]; P{y[+t7.7] w[+mC]=VT058688-p65.AD}attP40; P{y[+t7.7] w[+mC]=VT050234-GAL4.DBD}attP2
SS38949	Adult	Claire McKellar	Dickson	1	N	No	No	10.1101/2024.01.09.574419	Meissner; 2024	3031493			GMR_11B11-x-VT032162	w[1118]; P{y[+t7.7] w[+mC]=R11B11-p65.AD}attP40; P{y[+t7.7] w[+mC]=VT032162-GAL4.DBD}attP2
SS39089	Adult	Jens Goldammer	Rubin	2	N	No	Yes	10.1101/2024.01.09.574419	Meissner; 2024	3026636	SMP013, TuBu		GMR_23B05-x-GMR_83H09	w[1118]; P{y[+t7.7] w[+mC]=R83H09-GAL4.DBD}attP2 PBac{y[+mDint2] w[+mC]=R23B05-p65.AD}VK00027
SS39106	Adult	Jens Goldammer	Rubin	4	N	No	No	10.1101/2024.01.09.574419	Meissner; 2024	3026589	CRE003, SMP016		GMR_76B02-x-GMR_83H09	w[1118]; P{y[+t7.7] w[+mC]=R76B02-p65.AD}attP40; P{y[+t7.7] w[+mC]=R83H09-GAL4.DBD}attP2
SS39256	Adult	Gerry Rubin	Rubin	1	N	No	Yes	10.1101/2024.01.09.574419	Meissner; 2024	3029381	FB2E, 2H, 2I, 2J		GMR_44A02-x-GMR_12D12	w[1118]; P{y[+t7.7] w[+mC]=R44A02-p65.AD}attP40; P{y[+t7.7] w[+mC]=R12D12-GAL4.DBD}attP2
SS39271	Adult	Jens Goldammer	Rubin	1	N	No	No	10.1101/2024.01.09.574419	Meissner; 2024	3026539	IB097, No Name: 1314351013, 1405991898, IB101 and similar types?		VT019758-x-VT007746	w[1118]; P{y[+t7.7] w[+mC]=VT019758-p65.AD}attP40; P{y[+t7.7] w[+mC]=VT007746-GAL4.DBD}attP2
SS39274	Adult	Jens Goldammer	Rubin	1	N	No	Yes	10.1101/2024.01.09.574419	Meissner; 2024	3026554	ATL016		VT042732-x-VT022284	w[1118]; P{y[+t7.7] w[+mC]=VT042732-p65.AD}attP40; P{y[+t7.7] w[+mC]=VT022284-GAL4.DBD}attP2
SS39299	Adult	Jens Goldammer	Rubin	2	N	No	No	10.1101/2024.01.09.574419	Meissner; 2024	3026537	SMP470		GMR_27H01-x-VT034612	w[1118]; P{y[+t7.7] w[+mC]=R27H01-p65.AD}JK22C; P{y[+t7.7] w[+mC]=VT034612-GAL4.DBD}attP2/TM6B, Tb[1]
SS39319	Adult	Jens Goldammer	Rubin	1	N	No	Yes	10.1101/2024.01.09.574419	Meissner; 2024	3026541	PS243		GMR_85A07-x-VT007746	w[1118]; P{y[+t7.7] w[+mC]=R85A07-p65.AD}attP40; P{y[+t7.7] w[+mC]=VT007746-GAL4.DBD}attP2
SS39322	Adult	Kaiyu Wang	Dickson	2	N	No	No	10.1101/2024.01.09.574419	Meissner; 2024	3026661	AN, Abg_MN		VT032768-x-VT000608	w[1118]; P{y[+t7.7] w[+mC]=VT032768-p65.AD}attP40; P{y[+t7.7] w[+mC]=VT000608-GAL4.DBD}attP2
SS39553	Adult	Jens Goldammer	Rubin	1	N	No	No	10.1101/2024.01.09.574419	Meissner; 2024	3026558	SMP587		VT008149-x-VT056377	w[1118]; P{y[+t7.7] w[+mC]=VT008149-p65.AD}attP40; P{y[+t7.7] w[+mC]=VT056377-GAL4.DBD}attP2/TM6B, Tb[1]
SS39581	Adult	Jens Goldammer	Rubin	1	N	No	No	10.1101/2024.01.09.574419	Meissner; 2024	3039308	PS107, CL201, PS215		GMR_50A04-x-GMR_60G08	w[1118]; P{y[+t7.7] w[+mC]=R50A04-p65.AD}attP40/CyO; P{y[+t7.7] w[+mC]=R60G08-GAL4.DBD}attP2/TM6B, Tb[1]
SS39736	Adult	Aljoscha Nern	Rubin	2	N	No	No	10.1101/2024.01.09.574419	Meissner; 2024	3026303	PVLP003 (LC26g1)		GMR_25D01-x-GMR_20H05	w[1118]; P{y[+t7.7] w[+mC]=R25D01-p65.AD}attP40; P{y[+t7.7] w[+mC]=R20H05-GAL4.DBD}attP2
SS39749	Adult	Jens Goldammer	Rubin	1	N	No	No	10.1101/2024.01.09.574419	Meissner; 2024	3039137	PLP017		GMR_31E06-x-GMR_22A12	w[1118]; P{y[+t7.7] w[+mC]=R31E06-p65.AD}attP40/CyO; P{y[+t7.7] w[+mC]=R22A12-GAL4.DBD}attP2/TM6B, Tb[1]
SS40006	Adult	Jens Goldammer	Rubin	1	N	No	Yes	10.1101/2024.01.09.574419	Meissner; 2024	3026546	PLP009, PLP008		VT003229-x-VT016127	w[1118]; P{y[+t7.7] w[+mC]=VT003229-p65.AD}attP40; P{y[+t7.7] w[+mC]=VT016127-GAL4.DBD}attP2
SS40016	Adult	Jens Goldammer	Rubin	1	N	No	Yes	10.1101/2024.01.09.574419	Meissner; 2024	3026550	SAD077-SAD079, WED098-WED100		VT027934-x-VT002072	w[1118]; P{y[+t7.7] w[+mC]=VT027934-p65.AD}attP40; P{y[+t7.7] w[+mC]=VT002072-GAL4.DBD}attP2/TM6B, Tb[1]
SS40058	Adult	Jens Goldammer	Rubin	1	N	No	Yes	10.1101/2024.01.09.574419	Meissner; 2024	3026578	PS215		GMR_60G08-x-GMR_65A12	w[1118]; P{y[+t7.7] w[+mC]=R60G08-p65.AD}attP40; P{y[+t7.7] w[+mC]=R65A12-GAL4.DBD}attP2
SS40062	Adult	Jens Goldammer	Rubin	2	N	No	Yes	10.1101/2024.01.09.574419	Meissner; 2024	3026562	PS083, LAL094, LAL095		GMR_72H06-x-GMR_79D04	w[1118]; P{y[+t7.7] w[+mC]=R72H06-p65.AD}attP40; P{y[+t7.7] w[+mC]=R79D04-GAL4.DBD}attP2
SS40191	Adult	Masayoshi Ito	Rubin	1	N	No	Yes	10.1101/2024.01.09.574419	Meissner; 2024	3026345			VT045568-x-GMR_28E01	w[1118]; P{y[+t7.7] w[+mC]=VT045568-p65.AD}attP40; P{y[+t7.7] w[+mC]=R28E01-GAL4.DBD}attP2
SS40217	Adult	Masayoshi Ito	Rubin	1	N	No	Yes	10.1101/2024.01.09.574419	Meissner; 2024	3026351			GMR_46C02-x-GMR_77E05	w[1118]; P{y[+t7.7] w[+mC]=R46C02-p65.AD}attP40; P{y[+t7.7] w[+mC]=R77E05-GAL4.DBD}attP2
SS40261	Adult	Jim Truman	Truman	2	N	No	No	10.1101/2024.01.09.574419	Meissner; 2024	3027670	08B		VT048352-x-VT041433	w[1118]; P{y[+t7.7] w[+mC]=VT048352-p65.AD}attP40; P{y[+t7.7] w[+mC]=VT041433-GAL4.DBD}attP2
SS40265	Adult	Jim Truman	Truman	1	N	No	No	10.1101/2024.01.09.574419	Meissner; 2024	3027671	08B		VT063643-x-VT041433	w[1118]; P{y[+t7.7] w[+mC]=VT063643-p65.AD}attP40/CyO; P{y[+t7.7] w[+mC]=VT041433-GAL4.DBD}attP2
SS40272	Adult	Jim Truman	Truman	2	N	No	No	10.1101/2024.01.09.574419	Meissner; 2024	3027675	06A		VT039769-x-VT048645	w[1118]; P{y[+t7.7] w[+mC]=VT039769-p65.AD}attP40; P{y[+t7.7] w[+mC]=VT048645-GAL4.DBD}attP2
SS40274	Adult	Jim Truman	Truman	2	N	No	No	10.1101/2024.01.09.574419	Meissner; 2024	3027655	07B, 08B		VT039769-x-VT036302	w[1118]; P{y[+t7.7] w[+mC]=VT039769-p65.AD}attP40; P{y[+t7.7] w[+mC]=VT036302-GAL4.DBD}attP2
SS40275	Adult	Jim Truman	Truman	1	N	Yes	No	10.1101/2024.01.09.574419	Meissner; 2024	3027683	17A		VT014962-x-GMR_54H10	w[1118]; P{y[+t7.7] w[+mC]=VT014962-p65.AD}attP40; P{y[+t7.7] w[+mC]=R54H10-GAL4.DBD}attP2
SS40279	Adult	Jim Truman	Truman	1	N	Yes	No	10.1101/2024.01.09.574419	Meissner; 2024	3027662	05B		VT044655-x-VT004985	w[1118]; P{y[+t7.7] w[+mC]=VT044655-p65.AD}attP40; P{y[+t7.7] w[+mC]=VT004985-GAL4.DBD}attP2
SS40280	Adult	Jim Truman	Truman	1	N	No	No	10.1101/2024.01.09.574419	Meissner; 2024	3027665	05B		VT044655-x-VT046095	w[1118]; P{y[+t7.7] w[+mC]=VT044655-p65.AD}attP40; P{y[+t7.7] w[+mC]=VT046095-GAL4.DBD}attP2
SS40286	Adult	Jim Truman	Truman	2	N	No	No	10.1101/2024.01.09.574419	Meissner; 2024	3027664	07B		VT027014-x-VT061518	w[1118]; P{y[+t7.7] w[+mC]=VT027014-p65.AD}attP40; P{y[+t7.7] w[+mC]=VT061518-GAL4.DBD}attP2
SS40336	Adult	Claire McKellar	Dickson	2	N	No	No	10.1101/2024.01.09.574419	Meissner; 2024	3031487			VT042834-x-VT040359	w[1118]; P{y[+t7.7] w[+mC]=VT042834-p65.AD}attP40/CyO; P{y[+t7.7] w[+mC]=VT040359-GAL4.DBD}attP2
SS40380	Adult	Claire McKellar	Dickson	1	N	No	Yes	10.1101/2024.01.09.574419	Meissner; 2024	3031491			GMR_51H04-x-VT044850	w; 51H04-p65ADZp in attP40; VT044850-ZpGdbd in attP2
SS40401	Adult	Kaiyu Wang	Dickson	2	N	No	Yes	10.1101/2024.01.09.574419	Meissner; 2024	3026674			VT040005-x-VT038448	w[1118]; P{y[+t7.7] w[+mC]=VT040005-p65.AD}attP40; P{y[+t7.7] w[+mC]=VT038448-GAL4.DBD}attP2
SS40402	Adult	Kaiyu Wang	Dickson	1	N	No	No	10.1101/2024.01.09.574419	Meissner; 2024	3026675	SEZ_LN		VT042834-x-VT038448	w[1118]; P{y[+t7.7] w[+mC]=VT042834-p65.AD}attP40/CyO, P{w[+mC]=2xTb[1]-RFP}CyO; P{y[+t7.7] w[+mC]=VT038448-GAL4.DBD}attP2
SS40414	Adult	Kaiyu Wang	Dickson	1	N	No	No	10.1101/2024.01.09.574419	Meissner; 2024	3026764			VT008657-x-VT009665	w[1118]; P{y[+t7.7] w[+mC]=VT008657-p65.AD}attP40; P{y[+t7.7] w[+mC]=VT009665-GAL4.DBD}attP2
SS40429	Adult	Kaiyu Wang	Dickson	1	Y	No	No	10.1101/2024.01.09.574419	Meissner; 2024	3026688			GMR_47A04-x-VT016277	w[1118]; P{y[+t7.7] w[+mC]=R47A04-p65.AD}attP40; P{y[+t7.7] w[+mC]=VT016277-GAL4.DBD}attP2
SS40645	Adult	Ryo Minegishi	Dickson	1	N	Yes	No	10.1101/2024.01.09.574419	Meissner; 2024	3030801	LBI37, LBI43		GMR_21H09-x-GMR_59F08	w[1118]; P{y[+t7.7] w[+mC]=R21H09-p65.AD}attP40; P{y[+t7.7] w[+mC]=R59F08-GAL4.DBD}attP2
SS40657	Adult	Ryo Minegishi	Dickson	1	N	No	No	10.1101/2024.01.09.574419	Meissner; 2024	3029248	LUL164		GMR_69H11-x-VT038149	w[1118]; P{y[+t7.7] w[+mC]=R69H11-p65.AD}attP40; P{y[+t7.7] w[+mC]=VT038149-GAL4.DBD}attP2
SS40775	Adult	DI	DI	1	N	No	No	10.1101/2024.01.09.574419	Meissner; 2024	3026623	primary sensory		VT014480-x-GMR_12C07	w[1118]; P{y[+t7.7] w[+mC]=R12C07-GAL4.DBD}attP40; P{y[+t7.7] w[+mC]=VT014480-p65.AD}attP2
SS40789	Adult	DI	DI	2	N	No	No	10.1101/2024.01.09.574419	Meissner; 2024	3026637	ascending neuron		VT042001-x-GMR_11A09	w[1118]; P{y[+t7.7] w[+mC]=VT042001-p65.AD}attP40; P{y[+t7.7] w[+mC]=R11A09-GAL4.DBD}attP2/TM6B, Tb[1]
SS40794	Adult	DI	DI	1	N	No	No	10.1101/2024.01.09.574419	Meissner; 2024	3026628	ascending neuron		VT019771-x-GMR_88C07	w[1118]; P{y[+t7.7] w[+mC]=VT019771-p65.AD}attP40; P{y[+t7.7] w[+mC]=R88C07-GAL4.DBD}attP2
SS41506	Adult	Kaiyu Wang	Dickson	2	N	No	No	10.1101/2024.01.09.574419	Meissner; 2024	3026698			VT012639-x-VT008674	w[1118]; P{y[+t7.7] w[+mC]=VT012639-p65.AD}attP40; P{y[+t7.7] w[+mC]=VT008674-GAL4.DBD}attP2
SS41518	Adult	Kaiyu Wang	Dickson	2	N	No	No	10.1101/2024.01.09.574419	Meissner; 2024	3026746			VT062257-x-VT002072	w[1118]; P{y[+t7.7] w[+mC]=VT062257-p65.AD}attP40; P{y[+t7.7] w[+mC]=VT002072-GAL4.DBD}attP2
SS41564	Adult	Ryo Minegishi	Dickson	1	N	Yes	No	10.1101/2024.01.09.574419	Meissner; 2024	3028585	SN_mixed		VT054815-x-VT049481	w[1118]; P{y[+t7.7] w[+mC]=VT054815-p65.AD}attP40; P{y[+t7.7] w[+mC]=VT049481-GAL4.DBD}attP2/TM6B, Tb[1]
SS41570	Adult	Ryo Minegishi	Dickson	1	N	Yes	No	10.1101/2024.01.09.574419	Meissner; 2024	3029335	LBI49, LBI50, LBI65		VT058873-x-VT008170	w[1118]; P{y[+t7.7] w[+mC]=VT058873-p65.AD}attP40; P{y[+t7.7] w[+mC]=VT008170-GAL4.DBD}attP2
SS41581	Adult	Ryo Minegishi	Dickson	1	N	No	No	10.1101/2024.01.09.574419	Meissner; 2024	3030767	SN_mixed		VT016988-x-VT054815	w[1118]; P{y[+t7.7] w[+mC]=VT016988-p65.AD}attP40/CyO, P{w[+mC]=2xTb[1]-RFP}CyO; P{y[+t7.7] w[+mC]=VT054815-GAL4.DBD}attP2/TM6B, Tb[1]
SS41582	Adult	Ryo Minegishi	Dickson	2	N	No	No	10.1101/2024.01.09.574419	Meissner; 2024	3029392	SN_mixed		VT016988-x-GMR_79F08	w[1118]; P{y[+t7.7] w[+mC]=VT016988-p65.AD}attP40; P{y[+t7.7] w[+mC]=R79F08-GAL4.DBD}attP2
SS41584	Adult	Ryo Minegishi	Dickson	2	N	No	No	10.1101/2024.01.09.574419	Meissner; 2024	3029066	LBA9, LBI16		GMR_13E04-x-VT043132	w[1118]; P{y[+t7.7] w[+mC]=R13E04-p65.AD}attP40; P{y[+t7.7] w[+mC]=VT043132-GAL4.DBD}attP2
SS41646	Adult	Masayoshi Ito	Rubin	1	N	No	Yes	10.1101/2024.01.09.574419	Meissner; 2024	3026633	LAL065, LAL066		VT020527-x-GMR_44D05	w[1118]; P{y[+t7.7] w[+mC]=VT020527-p65.AD}attP40; P{y[+t7.7] w[+mC]=R44D05-GAL4.DBD}attP2
SS41752	Adult	Kaiyu Wang	Dickson	2	N	No	No	10.1101/2024.01.09.574419	Meissner; 2024	3030219			VT000454-x-VT025936	w[1118]; P{y[+t7.7] w[+mC]=VT000454-p65.AD}attP40; P{y[+t7.7] w[+mC]=VT025936-GAL4.DBD}attP2
SS41811	Adult	Ryo Minegishi	Dickson	1	N	Yes	No	10.1101/2024.01.09.574419	Meissner; 2024	3029247	LUL66		GMR_52E12-x-VT044649	w[1118]; P{y[+t7.7] w[+mC]=R52E12-p65.AD}attP40; P{y[+t7.7] w[+mC]=VT044649-GAL4.DBD}attP2
SS41835	Adult	Ryo Minegishi	Dickson	1	N	No	No	10.1101/2024.01.09.574419	Meissner; 2024	3029155	LBL8		GMR_19D12-x-VT000767	w[1118]; P{y[+t7.7] w[+mC]=R19D12-p65.AD}attP40; P{y[+t7.7] w[+mC]=VT000767-GAL4.DBD}attP2
SS41862	Adult	Ryo Minegishi	Dickson	2	N	No	No	10.1101/2024.01.09.574419	Meissner; 2024	3029496	LUL66		VT044649-x-GMR_52E12	w[1118]; P{y[+t7.7] w[+mC]=VT044649-p65.AD}attP40; P{y[+t7.7] w[+mC]=R52E12-GAL4.DBD}attP2/TM6B, Tb[1]
SS41947	Adult	Masayoshi Ito	Rubin	1	N	No	Yes	10.1101/2024.01.09.574419	Meissner; 2024	3026640	LAL073		VT043158-x-GMR_51F05	w[1118]; P{y[+t7.7] w[+mC]=VT043158-p65.AD}attP40; P{y[+t7.7] w[+mC]=R51F05-GAL4.DBD}attP2
SS41950	Adult	Masayoshi Ito	Rubin	1	N	No	Yes	10.1101/2024.01.09.574419	Meissner; 2024	3026592	LAL073		VT047755-x-VT034630	w[1118]; P{y[+t7.7] w[+mC]=VT047755-p65.AD}attP40; P{y[+t7.7] w[+mC]=VT034630-GAL4.DBD}attP2
SS41970	Adult	Masayoshi Ito	Rubin	2	N	No	No	10.1101/2024.01.09.574419	Meissner; 2024	3026622	LAL113		VT042810-x-GMR_51G03	w[1118]; P{y[+t7.7] w[+mC]=VT042810-p65.AD}attP40; P{y[+t7.7] w[+mC]=R51G03-GAL4.DBD}attP2
SS42258	Adult	Masayoshi Ito	Rubin	2	N	No	No	10.1101/2024.01.09.574419	Meissner; 2024	3026616	LAL085		VT047747-x-GMR_50A05	w[1118]; P{y[+t7.7] w[+mC]=VT047747-p65.AD}attP40; P{y[+t7.7] w[+mC]=R50A05-GAL4.DBD}attP2
SS42309	Adult	Masayoshi Ito	Rubin	1	N	No	Yes	10.1101/2024.01.09.574419	Meissner; 2024	3026859			GMR_78G06-x-VT017416	w[1118]; P{y[+t7.7] w[+mC]=R78G06-p65.AD}attP40; P{y[+t7.7] w[+mC]=VT017416-GAL4.DBD}attP2
SS42389	Adult	DI	DI	2	N	No	No	10.1101/2024.01.09.574419	Meissner; 2024	3030990	WNM (unpaired)		VT013612-x-GMR_11C01	w[1118]; P{y[+t7.7] w[+mC]=VT013612-p65.AD}attP40; P{y[+t7.7] w[+mC]=R11C01-GAL4.DBD}attP2
SS42406	Adult	DI	DI	1	N	No	No	10.1101/2024.01.09.574419	Meissner; 2024	3026812	primary sensory		VT043294-x-VT063548	w[1118]; P{y[+t7.7] w[+mC]=VT043294-p65.AD}attP40; P{y[+t7.7] w[+mC]=VT063548-GAL4.DBD}attP2
SS42461	Adult	DI	DI	1	N	No	No	10.1101/2024.01.09.574419	Meissner; 2024	3026833	primary sensory		GMR_39E01_XA_21-x-GMR_56B12	w[1118]; P{y[+t7.7] w[+mC]=R39E01-p65.AD}attP40; P{y[+t7.7] w[+mC]=R56B12-GAL4.DBD}attP2
SS42463	Adult	DI	DI	2	N	No	No	10.1101/2024.01.09.574419	Meissner; 2024	3030991	WNM (unpaired)		GMR_41A07-x-GMR_11C01	w[1118]; P{y[+t7.7] w[+mC]=R41A07-p65.AD}attP40; P{y[+t7.7] w[+mC]=R11C01-GAL4.DBD}attP2
SS42486	Adult	DI	DI	1	N	No	No	10.1101/2024.01.09.574419	Meissner; 2024	3026807	ascending neuron		GMR_72G03_BB_21-x-VT048567	w[1118]; P{y[+t7.7] w[+mC]=R72G03-p65.AD}attP40; P{y[+t7.7] w[+mC]=VT048567-GAL4.DBD}attP2
SS42744	Adult	Ryo Minegishi	Dickson	2	N	No	No	10.1101/2024.01.09.574419	Meissner; 2024	3029080	LBI31		GMR_15A01-x-VT044854	w[1118]; P{y[+t7.7] w[+mC]=R15A01-p65.AD}attP40; P{y[+t7.7] w[+mC]=VT044854-GAL4.DBD}attP2/TM6B, Tb[1]
SS42757	Adult	Ryo Minegishi	Dickson	1	N	No	No	10.1101/2024.01.09.574419	Meissner; 2024	3029345			GMR_81D09-x-VT004985	w[1118]; P{y[+t7.7] w[+mC]=R81D09-p65.AD}attP40/CyO, P{w[+mC]=2xTb[1]-RFP}CyO; P{y[+t7.7] w[+mC]=VT004985-GAL4.DBD}attP2
SS42960	Adult	Masayoshi Ito	Rubin	1	N	No	Yes	10.1101/2024.01.09.574419	Meissner; 2024	3026889	AVLP472, LHPV6q1		GMR_23B09-x-GMR_25C01	w[1118]; P{y[+t7.7] w[+mC]=R23B09-p65.AD}attP40; P{y[+t7.7] w[+mC]=R25C01-GAL4.DBD}attP2
SS42965	Adult	Masayoshi Ito	Rubin	2	N	No	No	10.1101/2024.01.09.574419	Meissner; 2024	3026863	WED015		GMR_30E08-x-VT019731	w[1118]; P{y[+t7.7] w[+mC]=R30E08-p65.AD}attP40/CyO, P{w[+mC]=2xTb[1]-RFP}CyO; P{y[+t7.7] w[+mC]=VT019731-GAL4.DBD}attP2
SS42993	Adult	Jens Goldammer	Rubin	1	N	No	Yes	10.1101/2024.01.09.574419	Meissner; 2024	3027813	CL108		VT037491-x-GMR_82D06	w[1118]; P{y[+t7.7] w[+mC]=VT037491-p65.AD}attP40; P{y[+t7.7] w[+mC]=R82D06-GAL4.DBD}attP2/TM6B, Tb[1]
SS43014	Adult	Jens Goldammer	Rubin	1	N	No	No	10.1101/2024.01.09.574419	Meissner; 2024	3027771	SMP048, SMP052		VT055812-x-VT029309	w[1118]; P{y[+t7.7] w[+mC]=VT055812-p65.AD}attP40; P{y[+t7.7] w[+mC]=VT029309-GAL4.DBD}attP2
SS43026	Adult	Jens Goldammer	Rubin	1	N	No	Yes	10.1101/2024.01.09.574419	Meissner; 2024	3027778	PS184, PS272		GMR_45B08-x-VT031084	w[1118]; P{y[+t7.7] w[+mC]=R45B08-p65.AD}attP40; P{y[+t7.7] w[+mC]=VT031084-GAL4.DBD}attP2
SS43399	Adult	Jens Goldammer	Rubin	2	N	No	No	10.1101/2024.01.09.574419	Meissner; 2024	3039156	SMP387		GMR_26C06-x-GMR_50B06	w[1118]; P{y[+t7.7] w[+mC]=R26C06-p65.AD}attP40; P{y[+t7.7] w[+mC]=R50B06-GAL4.DBD}attP2/T(2;3)B3, CyO: TM6B, Tb[1]
SS43425	Adult	Jens Goldammer	Rubin	2	N	No	No	10.1101/2024.01.09.574419	Meissner; 2024	3027768	IB101-IB108		VT007746-x-VT015782	w[1118]; P{y[+t7.7] w[+mC]=VT007746-p65.AD}attP40; P{y[+t7.7] w[+mC]=VT015782-GAL4.DBD}attP2/TM6B, Tb[1]
SS43542	Adult	Ryo Minegishi	Dickson	3	N	No	No	10.1101/2024.01.09.574419	Meissner; 2024	3029186	LUL50, LUL144		GMR_25F10-x-VT046018	w[1118]; P{y[+t7.7] w[+mC]=R25F10-p65.AD}attP40/CyO, P{w[+mC]=2xTb[1]-RFP}CyO; P{y[+t7.7] w[+mC]=VT046018-GAL4.DBD}attP2
SS43574	Adult	Kaiyu Wang	Dickson	2	N	No	No	10.1101/2024.01.09.574419	Meissner; 2024	3029969	WN_LN_mixed		VT043699-x-VT043699	w[1118]; P{y[+t7.7] w[+mC]=VT043699-p65.AD}attP40; P{y[+t7.7] w[+mC]=VT043699-GAL4.DBD}attP2
SS43583	Adult	Kaiyu Wang	Dickson	1	N	No	No	10.1101/2024.01.09.574419	Meissner; 2024	3030003			VT043699-x-VT043059	w[1118]; P{y[+t7.7] w[+mC]=VT043699-p65.AD}attP40/CyO, P{2xTb[1]-RFP}CyO; P{y[+t7.7] w[+mC]=VT043059-GAL4.DBD}attP2
SS43617	Adult	Kaiyu Wang	Dickson	1	N	Yes	No	10.1101/2024.01.09.574419	Meissner; 2024	3030231	VNC_LN		VT026172-x-VT049344	w[1118]; P{y[+t7.7] w[+mC]=VT026172-p65.AD}attP40; P{y[+t7.7] w[+mC]=VT049344-GAL4.DBD}attP2
SS43925	Adult	Masayoshi Ito	Rubin	1	N	No	No	10.1101/2024.01.09.574419	Meissner; 2024	3026881	LHPV2b3		VT027168-x-GMR_44D10	w[1118]; P{y[+t7.7] w[+mC]=VT027168-p65.AD}attP40; P{y[+t7.7] w[+mC]=R44D10-GAL4.DBD}attP2
SS43930	Adult	Masayoshi Ito	Rubin	1	N	No	No	10.1101/2024.01.09.574419	Meissner; 2024	3026893			VT000877-x-GMR_21C09	w[1118]; P{y[+t7.7] w[+mC]=VT000877-p65.AD}attP40; P{y[+t7.7] w[+mC]=R21C09-GAL4.DBD}attP2
SS43937	Adult	Masayoshi Ito	Rubin	1	N	No	Yes	10.1101/2024.01.09.574419	Meissner; 2024	3030676	LHPV2a1_a, LHPV2a1_b, LHPV2a1_c		GMR_17C09-x-GMR_65D07	w[1118]; P{y[+t7.7] w[+mC]=R17C09-p65.AD}attP40; P{y[+t7.7] w[+mC]=R65D07-GAL4.DBD}attP2/TM6B, Tb[+]
SS43943	Adult	Masayoshi Ito	Rubin	1	N	No	Yes	10.1101/2024.01.09.574419	Meissner; 2024	3026879	LHPV2a1_a, LHPV2a1_b, LHPV2a1_c		GMR_46A08-x-GMR_52H12	w[1118]; P{y[+t7.7] w[+mC]=R46A08-p65.AD}attP40; P{y[+t7.7] w[+mC]=R52H12-GAL4.DBD}attP2
SS44000	Adult	DI	DI	2	N	No	No	10.1101/2024.01.09.574419	Meissner; 2024	3027323	HN-WN-IN		VT008182-x-GMR_28E12	w[1118]; P{y[+t7.7] w[+mC]=VT008182-p65.AD}attP40; P{y[+t7.7] w[+mC]=R28E12-GAL4.DBD}attP2
SS44071	Adult	DI	DI	1	N	No	No	10.1101/2024.01.09.574419	Meissner; 2024	3031752	DNg11x2		GMR_34H12-x-GMR_85H06	w[1118]; P{y[+t7.7] w[+mC]=R34H12-p65.AD}attP40; P{y[+t7.7] w[+mC]=R85H06-GAL4.DBD}attP2
SS44233	Adult	Ryo Minegishi	Dickson	2	N	No	No	10.1101/2024.01.09.574419	Meissner; 2024	3029435	LUI7, LUL86		VT037491-x-VT050273	w[1118]; P{y[+t7.7] w[+mC]=VT037491-p65.AD}attP40; P{y[+t7.7] w[+mC]=VT050273-GAL4.DBD}attP2
SS44256	Adult	Ryo Minegishi	Dickson	1	N	No	No	10.1101/2024.01.09.574419	Meissner; 2024	3028573	LBI42		VT018764-x-VT023471	w[1118]; P{y[+t7.7] w[+mC]=VT018764-p65.AD}attP40/CyO, P{w[+mC]=2xTb[1]-RFP}CyO; P{y[+t7.7] w[+mC]=VT023471-GAL4.DBD}attP2
SS44348	Adult	Jens Goldammer	Rubin	2	N	No	No	10.1101/2024.01.09.574419	Meissner; 2024	3027788	VES019-VES021		VT026839-x-GMR_40C08	w[1118]; P{y[+t7.7] w[+mC]=VT026839-p65.AD}attP40; P{y[+t7.7] w[+mC]=R40C08-GAL4.DBD}attP2
SS44399	Adult	Masayoshi Ito	Rubin	1	N	No	No	10.1101/2024.01.09.574419	Meissner; 2024	3026877	CL129		VT002435-x-VT048582	w[1118]; P{y[+t7.7] w[+mC]=VT002435-p65.AD}attP40; P{y[+t7.7] w[+mC]=VT048582-GAL4.DBD}attP2
SS44402	Adult	Masayoshi Ito	Rubin	1	N	No	Yes	10.1101/2024.01.09.574419	Meissner; 2024	3026871	PLP200		VT021792-x-VT041832	w[1118]; P{y[+t7.7] w[+mC]=VT021792-p65.AD}attP40; P{y[+t7.7] w[+mC]=VT041832-GAL4.DBD}attP2
SS44408	Adult	Masayoshi Ito	Rubin	1	Y	No	Yes	10.1101/2024.01.09.574419	Meissner; 2024	3026891	CL062_a? CL062_b?		VT057295-x-GMR_31G11	w[1118]; P{y[+t7.7] w[+mC]=VT057295-p65.AD}attP40; P{y[+t7.7] w[+mC]=R31G11-GAL4.DBD}attP2
SS44414	Adult	Masayoshi Ito	Rubin	1	N	No	Yes	10.1101/2024.01.09.574419	Meissner; 2024	3026856	LHAV7b1		VT051935-x-VT044856	w[1118]; P{y[+t7.7] w[+mC]=VT051935-p65.AD}attP40; P{y[+t7.7] w[+mC]=VT044856-GAL4.DBD}attP2
SS44435	Adult	Masayoshi Ito	Rubin	1	N	No	No	10.1101/2024.01.09.574419	Meissner; 2024	3026870			VT029570-x-VT043653	w[1118]; P{y[+t7.7] w[+mC]=VT029570-p65.AD}attP40; P{y[+t7.7] w[+mC]=VT043653-GAL4.DBD}attP2
SS44443	Adult	Masayoshi Ito	Rubin	1	N	No	Yes	10.1101/2024.01.09.574419	Meissner; 2024	3026869	PVLP102?, PVLP103?, PVLP104?, PLP085?		GMR_12A11-x-VT024647	w[1118]; P{y[+t7.7] w[+mC]=R12A11-p65.AD}attP40; P{y[+t7.7] w[+mC]=VT024647-GAL4.DBD}attP2
SS44448	Adult	Kaiyu Wang	Dickson	1	N	No	No	10.1101/2024.01.09.574419	Meissner; 2024	3032525			GMR_23F02-x-VT043653	w[1118]; P{y[+t7.7] w[+mC]=R23F02-p65.AD}attP40; P{y[+t7.7] w[+mC]=VT043653-GAL4.DBD}attP2
SS44452	Adult	Masayoshi Ito	Rubin	1	N	No	Yes	10.1101/2024.01.09.574419	Meissner; 2024	3026868	PVLP149		GMR_24G01-x-VT024637	w[1118]; P{y[+t7.7] w[+mC]=R24G01-p65.AD}attP40; P{y[+t7.7] w[+mC]=VT024637-GAL4.DBD}attP2
SS44460	Adult	Masayoshi Ito	Rubin	1	N	No	No	10.1101/2024.01.09.574419	Meissner; 2024	3026888	LHPD2a1		GMR_37G11-x-GMR_67F03	w[1118]; P{y[+t7.7] w[+mC]=R37G11-p65.AD}attP40; P{y[+t7.7] w[+mC]=R67F03-GAL4.DBD}attP2
SS44477	Adult	Masayoshi Ito	Rubin	1	N	No	No	10.1101/2024.01.09.574419	Meissner; 2024	3026885	LHPD2a1		GMR_52F01-x-GMR_29F12	w[1118]; P{y[+t7.7] w[+mC]=R52F01-p65.AD}attP40; P{y[+t7.7] w[+mC]=R29F12-GAL4.DBD}attP2
SS44703	Adult	Jens Goldammer	Rubin	1	N	No	No	10.1101/2024.01.09.574419	Meissner; 2024	3027809	PS096_a, PS096_b, PS096_c		VT046052-x-GMR_33C10	w[1118]; P{y[+t7.7] w[+mC]=VT046052-p65.AD}attP40; P{y[+t7.7] w[+mC]=R33C10-GAL4.DBD}attP2
SS44744	Adult	Jens Goldammer	Rubin	1	N	No	Yes	10.1101/2024.01.09.574419	Meissner; 2024	3039265	PS267-PS270, 1128957081, 1159646273, 1128952511, 1345846711, 1996617318, 5813077987, 1996284778, 883514653		GMR_33G07-x-GMR_31H02	w[1118]; P{y[+t7.7] w[+mC]=R33G07-p65.AD}JK22C; P{y[+t7.7] w[+mC]=R31H02-GAL4.DBD}attP2
SS44759	Adult	Jens Goldammer	Rubin	1	N	No	Yes	10.1101/2024.01.09.574419	Meissner; 2024	3027815	VES036		GMR_39B03-x-GMR_73F02	w[1118]; P{y[+t7.7] w[+mC]=R39B03-p65.AD}JK22C; P{y[+t7.7] w[+mC]=R73F02-GAL4.DBD}attP2
SS44764	Adult	Jens Goldammer	Rubin	1	N	No	Yes	10.1101/2024.01.09.574419	Meissner; 2024	3039026	OCG05, OCG06		GMR_47C08-x-GMR_52E11	w[1118]; P{y[+t7.7] w[+mC]=R47C08-p65.AD}attP40/CyO; P{y[+t7.7] w[+mC]=R52E11-GAL4.DBD}attP2/TM6, Tb[1]
SS44794	Adult	Jens Goldammer	Rubin	1	N	No	No	10.1101/2024.01.09.574419	Meissner; 2024	3027776	PLP246		GMR_72H01-x-VT024603	w[1118]; P{y[+t7.7] w[+mC]=R72H01-p65.AD}attP40; P{y[+t7.7] w[+mC]=VT024603-GAL4.DBD}attP2
SS45192	Adult	Jens Goldammer	Rubin	1	N	No	Yes	10.1101/2024.01.09.574419	Meissner; 2024	3027799	PLP246		VT058856-x-GMR_42H01	w[1118]; P{y[+t7.7] w[+mC]=VT058856-p65.AD}attP40; P{y[+t7.7] w[+mC]=R42H01-GAL4.DBD}attP2
SS45221	Adult	Masayoshi Ito	Rubin	1	N	No	Yes	10.1101/2024.01.09.574419	Meissner; 2024	3027051	SMP108		VT018689-x-VT029309	w[1118]; P{y[+t7.7] w[+mC]=VT018689-p65.AD}attP40; P{y[+t7.7] w[+mC]=VT029309-GAL4.DBD}attP2
SS45226	Adult	Masayoshi Ito	Rubin	1	N	No	No	10.1101/2024.01.09.574419	Meissner; 2024	3027072	SMP136		VT044841-x-GMR_65E11	w[1118]; P{y[+t7.7] w[+mC]=VT044841-p65.AD}attP40; P{y[+t7.7] w[+mC]=R65E11-GAL4.DBD}attP2
SS45251	Adult	Masayoshi Ito	Rubin	1	N	No	Yes	10.1101/2024.01.09.574419	Meissner; 2024	3027034	CRE039	613083317, 644148539, 644153089, 739572008, 894551935, 5813054079, 5813054659, 5813123042	VT022004-x-VT045575	w[1118]; P{y[+t7.7] w[+mC]=VT022004-p65.AD}attP40; P{y[+t7.7] w[+mC]=VT045575-GAL4.DBD}attP2
SS45254	Adult	Masayoshi Ito	Rubin	1	N	No	No	10.1101/2024.01.09.574419	Meissner; 2024	3027046	LAL086, LAL087		VT039562-x-VT001597	w[1118]; P{y[+t7.7] w[+mC]=VT039562-p65.AD}attP40; P{y[+t7.7] w[+mC]=VT001597-GAL4.DBD}attP2
SS45308	Adult	Kaiyu Wang	Dickson	2	N	No	No	10.1101/2024.01.09.574419	Meissner; 2024	3030073	pMP (aSP23?)		VT062645-x-VT043690	w[1118]; P{y[+t7.7] w[+mC]=VT062645-p65.AD}attP40; P{y[+t7.7] w[+mC]=VT043690-GAL4.DBD}attP2
SS45310	Adult	Kaiyu Wang	Dickson	2	N	No	No	10.1101/2024.01.09.574419	Meissner; 2024	3029692	pMP, Abg		VT062645-x-VT016254	w[1118]; P{y[+t7.7] w[+mC]=VT062645-p65.AD}attP40; P{y[+t7.7] w[+mC]=VT016254-GAL4.DBD}attP2
SS45327	Adult	Kaiyu Wang	Dickson	1	N	No	Yes	10.1101/2024.01.09.574419	Meissner; 2024	3029713	pMP (aSP23?)		VT019330-x-VT062645	w[1118]; P{y[+t7.7] w[+mC]=VT019330-p65.AD}attP40; P{y[+t7.7] w[+mC]=VT062645-GAL4.DBD}attP2
SS45333	Adult	Kaiyu Wang	Dickson	1	N	No	No	10.1101/2024.01.09.574419	Meissner; 2024	3030217			VT030323-x-VT016254	w[1118]; P{y[+t7.7] w[+mC]=VT030323-p65.AD}attP40/CyO, P{w[+mC]=2xTb[1]-RFP}CyO; P{y[+t7.7] w[+mC]=VT016254-GAL4.DBD}attP2/TM6B, Tb[1]
SS45404	Adult	Ryo Minegishi	Dickson	2	N	No	No	10.1101/2024.01.09.574419	Meissner; 2024	3029341	LBL26, LBL28, LUL108		GMR_85A01-x-VT002408	w[1118]; P{y[+t7.7] w[+mC]=R85A01-p65.AD}attP40; P{y[+t7.7] w[+mC]=VT002408-GAL4.DBD}attP2
SS45406	Adult	Kaiyu Wang	Dickson	1	Y	No	No	10.1101/2024.01.09.574419	Meissner; 2024	3026658	Abg_SN		VT043658-x-VT043284	w[1118]; P{y[+t7.7] w[+mC]=VT043658-p65.AD}attP40; P{y[+t7.7] w[+mC]=VT043284-GAL4.DBD}attP2
SS45413	Adult	Kaiyu Wang	Dickson	2	N	No	No	10.1101/2024.01.09.574419	Meissner; 2024	3026667	Abg_MN		VT032768-x-VT019028	w[1118]; P{y[+t7.7] w[+mC]=VT032768-p65.AD}attP40; P{y[+t7.7] w[+mC]=VT019028-GAL4.DBD}attP2
SS45418	Adult	Kaiyu Wang	Dickson	1	Y	No	Yes	10.1101/2024.01.09.574419	Meissner; 2024	3026672			GMR_47A04-x-VT038448	w[1118]; P{y[+t7.7] w[+mC]=R47A04-p65.AD}attP40; P{y[+t7.7] w[+mC]=VT038448-GAL4.DBD}attP2
SS45421	Adult	Kaiyu Wang	Dickson	1	N	No	Yes	10.1101/2024.01.09.574419	Meissner; 2024	3026677	CC		VT040574-x-VT038817	w[1118]; P{y[+t7.7] w[+mC]=VT040574-p65.AD}attP40; P{y[+t7.7] w[+mC]=VT038817-GAL4.DBD}attP2
SS45422	Adult	Kaiyu Wang	Dickson	1	N	No	No	10.1101/2024.01.09.574419	Meissner; 2024	3026678	CC		GMR_14F03-x-VT038817	w[1118]; P{y[+t7.7] w[+mC]=R14F03-p65.AD}attP40; P{y[+t7.7] w[+mC]=VT038817-GAL4.DBD}attP2
SS45428	Adult	Kaiyu Wang	Dickson	2	Y	No	Yes	10.1101/2024.01.09.574419	Meissner; 2024	3026686			GMR_78B06-x-VT006460	w[1118]; P{y[+t7.7] w[+mC]=R78B06-p65.AD}attP40; P{y[+t7.7] w[+mC]=VT006460-GAL4.DBD}attP2/TM6B, Tb[1]
SS45429	Adult	Kaiyu Wang	Dickson	2	Y	No	No	10.1101/2024.01.09.574419	Meissner; 2024	3026687	AN		VT062645-x-VT016277	w; VT062645-p65ADZp in attP40/CyOTb; VT016277-ZpGDBD in attP2/TM6B
SS45434	Adult	Kaiyu Wang	Dickson	1	N	No	Yes	10.1101/2024.01.09.574419	Meissner; 2024	3026695			GMR_41A08-x-VT043699	w[1118]; P{y[+t7.7] w[+mC]=R41A08-p65.AD}attP40; P{y[+t7.7] w[+mC]=VT043699-GAL4.DBD}attP2
SS45444	Adult	Kaiyu Wang	Dickson	2	N	No	No	10.1101/2024.01.09.574419	Meissner; 2024	3026709	vlpr_PN		VT059450-x-VT014974	w[1118]; P{y[+t7.7] w[+mC]=VT059450-p65.AD}attP40; P{y[+t7.7] w[+mC]=VT014974-GAL4.DBD}attP2
SS45446	Adult	Kaiyu Wang	Dickson	1	N	No	No	10.1101/2024.01.09.574419	Meissner; 2024	3026711			VT032768-x-VT030303	w[1118]; P{y[+t7.7] w[+mC]=VT032768-p65.AD}attP40; P{y[+t7.7] w[+mC]=VT030303-GAL4.DBD}attP2/TM6B, Tb[1]
SS45454	Adult	Kaiyu Wang	Dickson	2	Y	No	No	10.1101/2024.01.09.574419	Meissner; 2024	3026720	Abg_SN		VT043658-x-VT019023	w[1118]; P{y[+t7.7] w[+mC]=VT043658-p65.AD}attP40; P{y[+t7.7] w[+mC]=VT019023-GAL4.DBD}attP2
SS45463	Adult	Kaiyu Wang	Dickson	1	N	No	No	10.1101/2024.01.09.574419	Meissner; 2024	3026729	VNC_SN		VT032768-x-VT016238	w[1118]; P{y[+t7.7] w[+mC]=VT032768-p65.AD}attP40; P{y[+t7.7] w[+mC]=VT016238-GAL4.DBD}attP2
SS45465	Adult	Kaiyu Wang	Dickson	2	N	No	No	10.1101/2024.01.09.574419	Meissner; 2024	3026731	OSN		VT063232-x-VT006391	w[1118]; P{y[+t7.7] w[+mC]=VT063232-p65.AD}attP40; P{y[+t7.7] w[+mC]=VT006391-GAL4.DBD}attP2
SS45466	Adult	Kaiyu Wang	Dickson	2	N	No	No	10.1101/2024.01.09.574419	Meissner; 2024	3026732	JON		VT028445-x-VT006391	w[1118]; P{y[+t7.7] w[+mC]=VT028445-p65.AD}attP40; P{y[+t7.7] w[+mC]=VT006391-GAL4.DBD}attP2
SS45467	Adult	Kaiyu Wang	Dickson	2	N	No	No	10.1101/2024.01.09.574419	Meissner; 2024	3026733	JON		VT039997-x-VT006391	w[1118]; P{y[+t7.7] w[+mC]=VT039997-p65.AD}attP40; P{y[+t7.7] w[+mC]=VT006391-GAL4.DBD}attP2/TM6B, Tb[1]
SS45470	Adult	Kaiyu Wang	Dickson	2	N	No	No	10.1101/2024.01.09.574419	Meissner; 2024	3026736	JON		VT006391-x-VT008660	w[1118]; P{y[+t7.7] w[+mC]=VT006391-p65.AD}attP40; P{y[+t7.7] w[+mC]=VT008660-GAL4.DBD}attP2
SS45476	Adult	Kaiyu Wang	Dickson	1	N	No	No	10.1101/2024.01.09.574419	Meissner; 2024	3026743	aSP		VT004979-x-VT004979	w[1118]; P{y[+t7.7] w[+mC]=VT004979-p65.AD}attP40; P{y[+t7.7] w[+mC]=VT004979-GAL4.DBD}attP2/TM6B, Tb[1]
SS45478	Adult	Kaiyu Wang	Dickson	2	N	No	No	10.1101/2024.01.09.574419	Meissner; 2024	3026747	FB		VT039997-x-VT012716	w[1118]; P{y[+t7.7] w[+mC]=VT039997-p65.AD}attP40; P{y[+t7.7] w[+mC]=VT012716-GAL4.DBD}attP2
SS45479	Adult	Kaiyu Wang	Dickson	1	N	No	No	10.1101/2024.01.09.574419	Meissner; 2024	3026749	pMP		VT031392-x-VT045568	w[1118]; P{y[+t7.7] w[+mC]=VT031392-p65.AD}attP40; P{y[+t7.7] w[+mC]=VT045568-GAL4.DBD}attP2
SS45484	Adult	Kaiyu Wang	Dickson	2	Y	No	No	10.1101/2024.01.09.574419	Meissner; 2024	3026754	JON		VT032768-x-VT017694	w[1118]; P{y[+t7.7] w[+mC]=VT032768-p65.AD}attP40; P{y[+t7.7] w[+mC]=VT017694-GAL4.DBD}attP2/TM6B, Tb[1]
SS45492	Adult	Kaiyu Wang	Dickson	2	N	No	No	10.1101/2024.01.09.574419	Meissner; 2024	3026762	vlpr_LN		VT058873-x-VT058565	w[1118]; P{y[+t7.7] w[+mC]=VT058873-p65.AD}attP40; P{y[+t7.7] w[+mC]=VT058565-GAL4.DBD}attP2
SS45494	Adult	Kaiyu Wang	Dickson	2	N	No	No	10.1101/2024.01.09.574419	Meissner; 2024	3026765			VT028324-x-VT065306	w[1118]; P{y[+t7.7] w[+mC]=VT028324-p65.AD}attP40; P{y[+t7.7] w[+mC]=VT065306-GAL4.DBD}attP2
SS45507	Adult	Kaiyu Wang	Dickson	2	N	No	No	10.1101/2024.01.09.574419	Meissner; 2024	3026779	vlpr_PN		VT040005-x-VT057224	w[1118]; P{y[+t7.7] w[+mC]=VT040005-p65.AD}attP40; P{y[+t7.7] w[+mC]=VT057224-GAL4.DBD}attP2
SS45510	Adult	Kaiyu Wang	Dickson	1	N	No	No	10.1101/2024.01.09.574419	Meissner; 2024	3026783			VT043689-x-VT022289	w[1118]; P{y[+t7.7] w[+mC]=VT043689-p65.AD}attP40; P{y[+t7.7] w[+mC]=VT022289-GAL4.DBD}attP2
SS45514	Adult	Kaiyu Wang	Dickson	2	N	No	No	10.1101/2024.01.09.574419	Meissner; 2024	3026787			VT020732-x-VT012760	w[1118]; P{y[+t7.7] w[+mC]=VT020732-p65.AD}attP40; P{y[+t7.7] w[+mC]=VT012760-GAL4.DBD}attP2
SS45515	Adult	Kaiyu Wang	Dickson	2	N	No	No	10.1101/2024.01.09.574419	Meissner; 2024	3026789	vlpr_LN, WN_LN_mixed		VT016966-x-GMR_65G08	w[1118]; P{y[+t7.7] w[+mC]=VT016966-p65.AD}attP40; P{y[+t7.7] w[+mC]=R65G08-GAL4.DBD}attP2
SS45516	Adult	Kaiyu Wang	Dickson	1	N	No	No	10.1101/2024.01.09.574419	Meissner; 2024	3026790	aSP8-like		GMR_23G05-x-GMR_38A07	w[1118]; P{y[+t7.7] w[+mC]=R23G05-p65.AD}attP40; P{y[+t7.7] w[+mC]=R38A07-GAL4.DBD}attP2/TM6B, Tb[1]
SS45518	Adult	Kaiyu Wang	Dickson	1	N	No	No	10.1101/2024.01.09.574419	Meissner; 2024	3026792	pMP		VT014708-x-GMR_14G03	w[1118]; P{y[+t7.7] w[+mC]=VT014708-p65.AD}attP40; P{y[+t7.7] w[+mC]=R14G03-GAL4.DBD}attP2
SS45542	Adult	Masayoshi Ito	Rubin	1	N	No	No	10.1101/2024.01.09.574419	Meissner; 2024	3027065	OA-VPM4		VT057227-x-GMR_95A10	w[1118]; P{y[+t7.7] w[+mC]=VT057227-p65.AD}attP40; P{y[+t7.7] w[+mC]=R95A10-GAL4.DBD}attP2
SS45560	Adult	Masayoshi Ito	Rubin	2	N	No	No	10.1101/2024.01.09.574419	Meissner; 2024	3027063		1097555044	GMR_53C05-x-GMR_60F02	w[1118]; P{y[+t7.7] w[+mC]=R53C05-p65.AD}attP40; P{y[+t7.7] w[+mC]=R60F02-GAL4.DBD}attP2
SS45780	Adult	DI	DI	1	N	Yes	No	10.1101/2024.01.09.574419	Meissner; 2024	3030975	WN-IN		VT043294-x-VT017873	w[1118]; P{y[+t7.7] w[+mC]=VT043294-p65.AD}attP40/CyO, P{w[+mC]=2xTb[1]-RFP}CyO; P{y[+t7.7] w[+mC]=VT017873-GAL4.DBD}attP2
SS45805	Adult	DI	DI	1	Y	No	No	10.1101/2024.01.09.574419	Meissner; 2024	3027314	DMg28 small? neurosecretory		GMR_64C05-x-VT037534	w[1118]; P{y[+t7.7] w[+mC]=VT037534-GAL4.DBD}attP2 PBac{y[+mDint2] w[+mC]=R64C05-p65.AD}VK00027
SS45808	Adult	DI	DI	1	N	No	No	10.1101/2024.01.09.574419	Meissner; 2024	3030982	T2LFN		GMR_67E03-x-VT059451	w[1118]; P{y[+t7.7] w[+mC]=R67E03-p65.AD}attP40; P{y[+t7.7] w[+mC]=VT059451-GAL4.DBD}attP2
SS45828	Adult	DI	DI	2	N	No	No	10.1101/2024.01.09.574419	Meissner; 2024	3027311	T2LFNb		GMR_78B06-x-VT059451	w[1118]; P{y[+t7.7] w[+mC]=R78B06-p65.AD}attP40; P{y[+t7.7] w[+mC]=VT059451-GAL4.DBD}attP2
SS45829	Adult	DI	DI	1	N	No	No	10.1101/2024.01.09.574419	Meissner; 2024	3031753	T2LFNb		GMR_78B06-x-GMR_59F02	w[1118]; P{y[+t7.7] w[+mC]=R78B06-p65.AD}attP40; P{y[+t7.7] w[+mC]=R59F02-GAL4.DBD}attP2
SS45967	Adult	Masayoshi Ito	Rubin	1	N	No	No	10.1101/2024.01.09.574419	Meissner; 2024	3027338	PLP046_a		VT008655-x-GMR_30E09	w[1118]; P{y[+t7.7] w[+mC]=VT008655-p65.AD}attP40; P{y[+t7.7] w[+mC]=R30E09-GAL4.DBD}attP2
SS45972	Adult	Masayoshi Ito	Rubin	1	N	No	No	10.1101/2024.01.09.574419	Meissner; 2024	3027324	PLP039		VT034811-x-GMR_42E03	w[1118]; P{y[+t7.7] w[+mC]=VT034811-p65.AD}attP40; P{y[+t7.7] w[+mC]=R42E03-GAL4.DBD}attP2
SS45987	Adult	Masayoshi Ito	Rubin	1	N	No	No	10.1101/2024.01.09.574419	Meissner; 2024	3027295		1882031306	VT014336-x-VT020822	w[1118]; P{y[+t7.7] w[+mC]=VT014336-p65.AD}attP40; P{y[+t7.7] w[+mC]=VT020822-GAL4.DBD}attP2
SS45988	Adult	Masayoshi Ito	Rubin	1	N	No	No	10.1101/2024.01.09.574419	Meissner; 2024	3027302			VT029785-x-VT000775	w[1118]; P{y[+t7.7] w[+mC]=VT029785-p65.AD}attP40; P{y[+t7.7] w[+mC]=VT000775-GAL4.DBD}attP2
SS45993	Adult	Masayoshi Ito	Rubin	1	N	No	Yes	10.1101/2024.01.09.574419	Meissner; 2024	3027319	LHPV3a1?, LHPV3a2?, LHPV3a3_a?, LHPV3a3_b?, LHPV3a3_c?		GMR_10E06-x-VT030557	w[1118]; P{y[+t7.7] w[+mC]=R10E06-p65.AD}attP40; P{y[+t7.7] w[+mC]=VT030557-GAL4.DBD}attP2
SS45998	Adult	Masayoshi Ito	Rubin	1	N	No	Yes	10.1101/2024.01.09.574419	Meissner; 2024	3027316	LHPV3a1? LHPV3a2? LHPV3a3_a? LHPV3a3_b? LHPV3a3_c?		GMR_48E02-x-VT030557	w[1118]; P{y[+t7.7] w[+mC]=R48E02-p65.AD}attP40; P{y[+t7.7] w[+mC]=VT030557-GAL4.DBD}attP2
SS46011	Adult	Masayoshi Ito	Rubin	2	N	No	No	10.1101/2024.01.09.574419	Meissner; 2024	3027290	SLP461		VT016681-x-VT045565	w[1118]; P{y[+t7.7] w[+mC]=VT016681-p65.AD}attP40; P{y[+t7.7] w[+mC]=VT045565-GAL4.DBD}attP2
SS46017	Adult	Masayoshi Ito	Rubin	1	N	No	No	10.1101/2024.01.09.574419	Meissner; 2024	3027321	SMP351		VT040545-x-GMR_48F06	w[1118]; P{y[+t7.7] w[+mC]=VT040545-p65.AD}attP40; P{y[+t7.7] w[+mC]=R48F06-GAL4.DBD}attP2
SS46285	Adult	Ryo Minegishi	Dickson	1	N	No	No	10.1101/2024.01.09.574419	Meissner; 2024	3029328	LBI63, LBI64, LBL40		VT026646-x-VT059794	w; VT026646-p65ADZp in attP40; VT059794-ZpGdbd in attP2
SS46301	Adult	Ryo Minegishi	Dickson	3	N	No	No	10.1101/2024.01.09.574419	Meissner; 2024	3028650	LBI26		VT043146-x-VT065317	w[1118]; P{y[+t7.7] w[+mC]=VT043146-p65.AD}attP40/CyO, P{w[+mC]=2xTb[1]-RFP}CyO; P{y[+t7.7] w[+mC]=VT065317-GAL4.DBD}attP2
SS46314	Adult	Ryo Minegishi	Dickson	2	N	No	No	10.1101/2024.01.09.574419	Meissner; 2024	3029221	SN_mixed		GMR_73C04-x-VT045996	w[1118]; P{y[+t7.7] w[+mC]=R73C04-p65.AD}attP40; P{y[+t7.7] w[+mC]=VT045996-GAL4.DBD}attP2
SS46317	Adult	Ryo Minegishi	Dickson	1	N	Yes	No	10.1101/2024.01.09.574419	Meissner; 2024	3029279	SN_mixed		GMR_73C04-x-GMR_59A06	w[1118]; P{y[+t7.7] w[+mC]=R73C04-p65.AD}attP40; P{y[+t7.7] w[+mC]=R59A06-GAL4.DBD}attP2/TM6B, Tb[1]
SS46318	Adult	Ryo Minegishi	Dickson	1	N	Yes	No	10.1101/2024.01.09.574419	Meissner; 2024	3029283	SN_mixed		GMR_73C04-x-GMR_75G05	w[1118]; P{y[+t7.7] w[+mC]=R73C04-p65.AD}attP40; P{y[+t7.7] w[+mC]=R75G05-GAL4.DBD}attP2
SS46319	Adult	Ryo Minegishi	Dickson	1	N	Yes	No	10.1101/2024.01.09.574419	Meissner; 2024	3029278	SN_mixed		GMR_75G05-x-GMR_73C04	w[1118]; P{y[+t7.7] w[+mC]=R75G05-p65.AD}attP40; P{y[+t7.7] w[+mC]=R73C04-GAL4.DBD}attP2
SS46330	Adult	Masayoshi Ito	Rubin	1	N	No	Yes	10.1101/2024.01.09.574419	Meissner; 2024	3027334	WED154		VT003436-x-GMR_23B09	w[1118]; P{y[+t7.7] w[+mC]=VT003436-p65.AD}attP40; P{y[+t7.7] w[+mC]=R23B09-GAL4.DBD}attP2
SS46337	Adult	Masayoshi Ito	Rubin	1	N	No	No	10.1101/2024.01.09.574419	Meissner; 2024	3027300	SMP184		VT037550-x-VT046831	w[1118]; P{y[+t7.7] w[+mC]=VT037550-p65.AD}attP40; P{y[+t7.7] w[+mC]=VT046831-GAL4.DBD}attP2
SS46367	Adult	Masayoshi Ito	Rubin	1	N	No	Yes	10.1101/2024.01.09.574419	Meissner; 2024	3027307			GMR_32A04-x-VT042767	w[1118]; P{y[+t7.7] w[+mC]=R32A04-p65.AD}attP40; P{y[+t7.7] w[+mC]=VT042767-GAL4.DBD}attP2/TM6B, Tb[1]
SS46377	Adult	Masayoshi Ito	Rubin	1	N	No	No	10.1101/2024.01.09.574419	Meissner; 2024	3027328	PVLP142		GMR_68B06-x-GMR_55C09	w[1118]; P{y[+t7.7] w[+mC]=R68B06-p65.AD}attP40; P{y[+t7.7] w[+mC]=R55C09-GAL4.DBD}attP2
SS46560	Adult	Jens Goldammer	Rubin	2	N	No	Yes	10.1101/2024.01.09.574419	Meissner; 2024	3027812	SMP016		VT027323-x-GMR_60G08	w[1118]; P{y[+t7.7] w[+mC]=VT027323-p65.AD}attP40; P{y[+t7.7] w[+mC]=R60G08-GAL4.DBD}attP2
SS46563	Adult	Jens Goldammer	Rubin	1	N	No	Yes	10.1101/2024.01.09.574419	Meissner; 2024	3027784	OCG01		VT000877-x-GMR_95A11	w[1118]; P{y[+t7.7] w[+mC]=VT000877-p65.AD}attP40; P{y[+t7.7] w[+mC]=R95A11-GAL4.DBD}attP2
SS46572	Adult	Jens Goldammer	Rubin	1	N	No	No	10.1101/2024.01.09.574419	Meissner; 2024	3027818	SMP021		GMR_26F05-x-GMR_83H09	w[1118]; P{y[+t7.7] w[+mC]=R26F05-p65.AD}JK22C; P{y[+t7.7] w[+mC]=R83H09-GAL4.DBD}attP2
SS46577	Adult	Jens Goldammer	Rubin	1	N	No	Yes	10.1101/2024.01.09.574419	Meissner; 2024	3038998	OCG01		GMR_72B05-x-GMR_95A11	w[1118]; P{y[+t7.7] w[+mC]=R72B05-p65.AD}attP40; P{y[+t7.7] w[+mC]=R95A11-GAL4.DBD}attP2
SS46589	Adult	Masayoshi Ito	Rubin	2	N	No	No	10.1101/2024.01.09.574419	Meissner; 2024	3027629	SLP364		VT040980-x-VT023830	w[1118]; P{y[+t7.7] w[+mC]=VT040980-p65.AD}attP40; P{y[+t7.7] w[+mC]=VT023830-GAL4.DBD}attP2/TM6B, Tb[1]
SS46603	Adult	Masayoshi Ito	Rubin	1	N	No	No	10.1101/2024.01.09.574419	Meissner; 2024	3027642	OA-VUMa7, 672598344		VT019391-x-VT058566	w[1118]; P{y[+t7.7] w[+mC]=VT019391-p65.AD}attP40/CyO, P{w[+mC]=2xTb[1]-RFP}CyO; P{y[+t7.7] w[+mC]=VT058566-GAL4.DBD}attP2
SS46613	Adult	Masayoshi Ito	Rubin	1	N	No	Yes	10.1101/2024.01.09.574419	Meissner; 2024	3027647	SMP181, SMP182		GMR_12D12-x-GMR_11D02	w; 12D12-p65ADZp in attP40; 11D02-ZpGDBD in attP2/TM6B
SS46630	Adult	Masayoshi Ito	Rubin	1	N	No	No	10.1101/2024.01.09.574419	Meissner; 2024	3027643	OA-VPM3		GMR_77F03-x-VT058566	w[1118]; P{y[+t7.7] w[+mC]=R77F03-p65.AD}attP40; P{y[+t7.7] w[+mC]=VT058566-GAL4.DBD}attP2
SS46697	Adult	Ryo Minegishi	Dickson	2	N	No	No	10.1101/2024.01.09.574419	Meissner; 2024	3028517			VT063982-x-VT017928	w[1118]; P{y[+t7.7] w[+mC]=VT063982-p65.AD}attP40; P{y[+t7.7] w[+mC]=VT017928-GAL4.DBD}attP2
SS46706	Adult	Ryo Minegishi	Dickson	1	N	No	No	10.1101/2024.01.09.574419	Meissner; 2024	3028579	LBL36		VT031084-x-VT026018	w[1118]; P{y[+t7.7] w[+mC]=VT031084-p65.AD}attP40; P{y[+t7.7] w[+mC]=VT026018-GAL4.DBD}attP2/TM6B, Tb[1]
SS46716	Adult	Ryo Minegishi	Dickson	2	N	No	No	10.1101/2024.01.09.574419	Meissner; 2024	3029331	MN		VT029305-x-VT034804	w; VT029305-p65ADZp in attP40; VT034804-ZpGdbd in attP2
SS46798	Adult	Kaiyu Wang	Dickson	2	N	No	No	10.1101/2024.01.09.574419	Meissner; 2024	3030253			GMR_22E04-x-GMR_50B03	w[1118]; P{y[+t7.7] w[+mC]=R22E04-p65.AD}attP40; P{y[+t7.7] w[+mC]=R50B03-GAL4.DBD}attP2
SS47009	Adult	Jens Goldammer	Rubin	2	N	No	No	10.1101/2024.01.09.574419	Meissner; 2024	3027802		1251443404, 1313491897, 1282806606	VT046011-x-GMR_38E08	w[1118]; P{y[+t7.7] w[+mC]=VT046011-p65.AD}attP40/CyO, P{w[+mC]=2xTb[1]-RFP}CyO; P{y[+t7.7] w[+mC]=R38E08-GAL4.DBD}attP2
SS47554	Adult	Masayoshi Ito	Rubin	1	N	No	No	10.1101/2024.01.09.574419	Meissner; 2024	3027645	CL001, CL002		VT048339-x-GMR_75F10	w[1118]; P{y[+t7.7] w[+mC]=VT048339-p65.AD}attP40; P{y[+t7.7] w[+mC]=R75F10-GAL4.DBD}attP2
SS47557	Adult	Masayoshi Ito	Rubin	1	N	No	No	10.1101/2024.01.09.574419	Meissner; 2024	3027640	endocrine cell, DN		GMR_24H12-x-VT002329	w[1118]; P{y[+t7.7] w[+mC]=R24H12-p65.AD}attP40; P{y[+t7.7] w[+mC]=VT002329-GAL4.DBD}attP2/TM6B, Tb[1]
SS47562	Adult	Masayoshi Ito	Rubin	1	N	No	No	10.1101/2024.01.09.574419	Meissner; 2024	3027636	SIP018		VT006819-x-VT040554	w[1118]; P{y[+t7.7] w[+mC]=VT006819-p65.AD}attP40; P{y[+t7.7] w[+mC]=VT040554-GAL4.DBD}attP2
SS47578	Adult	Masayoshi Ito	Rubin	1	N	No	Yes	10.1101/2024.01.09.574419	Meissner; 2024	3027654	5-HTPMPD01		GMR_46C02-x-VT006552	w[1118]; P{y[+t7.7] w[+mC]=R46C02-p65.AD}attP40; P{y[+t7.7] w[+mC]=VT006552-GAL4.DBD}attP2
SS47815	Adult	Masayoshi Ito	Rubin	1	N	No	Yes	10.1101/2024.01.09.574419	Meissner; 2024	3030181			GMR_26F05-x-GMR_51H05	w[1118]; P{y[+t7.7] w[+mC]=R26F05-p65.AD}JK22C; P{y[+t7.7] w[+mC]=R51H05-GAL4.DBD}attP2
SS47816	Adult	Jens Goldammer	Rubin	1	N	No	Yes	10.1101/2024.01.09.574419	Meissner; 2024	3039151	CL033		GMR_29C06-x-VT026664	w[1118]; P{y[+t7.7] w[+mC]=R29C06-p65.AD}JK22C/CyO; P{y[+t7.7] w[+mC]=VT026664-GAL4.DBD}attP2/TM6B, Tb[1]
SS47827	Adult	Jens Goldammer	Rubin	2	N	No	No	10.1101/2024.01.09.574419	Meissner; 2024	3027806	LAL170		GMR_67A08-x-GMR_89A03	w[1118]; P{y[+t7.7] w[+mC]=R67A08-p65.AD}attP40; P{y[+t7.7] w[+mC]=R89A03-GAL4.DBD}attP2
SS47833	Adult	Ryo Minegishi	Dickson	2	N	No	No	10.1101/2024.01.09.574419	Meissner; 2024	3028499	SN_mixed		VT009832-x-VT020739	w[1118]; P{y[+t7.7] w[+mC]=VT009832-p65.AD}attP40; P{y[+t7.7] w[+mC]=VT020739-GAL4.DBD}attP2
SS47877	Adult	Ryo Minegishi	Dickson	1	N	Yes	No	10.1101/2024.01.09.574419	Meissner; 2024	3029245	LUL170		GMR_66A06-x-VT061931	w; 66A06-p65ADZp in attP40; VT061931-ZpGDBD in attP2
SS47885	Adult	Ryo Minegishi	Dickson	4	N	Yes	No	10.1101/2024.01.09.574419	Meissner; 2024	3029397	SN_mixed		GMR_85B09-x-GMR_37G07	w[1118]; P{y[+t7.7] w[+mC]=R85B09-p65.AD}attP40/CyO, P{w[+mC]=2xTb[1]-RFP}CyO; P{y[+t7.7] w[+mC]=R37G07-GAL4.DBD}attP2/TM6B, Tb[1]
SS47886	Adult	Ryo Minegishi	Dickson	2	N	No	No	10.1101/2024.01.09.574419	Meissner; 2024	3029352	SN_mixed		GMR_93D09-x-VT009832	w[1118]; P{y[+t7.7] w[+mC]=R93D09-p65.AD}attP40; P{y[+t7.7] w[+mC]=VT009832-GAL4.DBD}attP2
SS47887	Adult	Ryo Minegishi	Dickson	2	N	No	No	10.1101/2024.01.09.574419	Meissner; 2024	3029344	SN_mixed		GMR_93D09-x-VT050663	w[1118]; P{y[+t7.7] w[+mC]=R93D09-p65.AD}attP40; P{y[+t7.7] w[+mC]=VT050663-GAL4.DBD}attP2/TM6B, Tb[1]
SS47888	Adult	Ryo Minegishi	Dickson	1	N	No	No	10.1101/2024.01.09.574419	Meissner; 2024	3029358	SN_mixed		GMR_93D09-x-VT061711	w[1118]; P{y[+t7.7] w[+mC]=R93D09-p65.AD}attP40; P{y[+t7.7] w[+mC]=VT061711-GAL4.DBD}attP2
SS47889	Adult	Ryo Minegishi	Dickson	1	N	No	No	10.1101/2024.01.09.574419	Meissner; 2024	3030466	SN_mixed		GMR_93D09-x-VT038167	w[1118]; P{y[+t7.7] w[+mC]=R93D09-p65.AD}attP40; P{y[+t7.7] w[+mC]=VT038167-GAL4.DBD}attP2
SS47890	Adult	Ryo Minegishi	Dickson	2	N	No	No	10.1101/2024.01.09.574419	Meissner; 2024	3029336	SN_mixed		GMR_93D09-x-VT008429	w[1118]; P{y[+t7.7] w[+mC]=R93D09-p65.AD}attP40; P{y[+t7.7] w[+mC]=VT008429-GAL4.DBD}attP2
SS47914	Adult	Ryo Minegishi	Dickson	4	N	No	No	10.1101/2024.01.09.574419	Meissner; 2024	3031748	LBL9		VT049362-x-VT050669	w[1118]; P{y[+t7.7] w[+mC]=VT049362-p65.AD}attP40; P{y[+t7.7] w[+mC]=VT050669-GAL4.DBD}attP2
SS47918	Adult	Ryo Minegishi	Dickson	1	N	No	No	10.1101/2024.01.09.574419	Meissner; 2024	3031867	LBA67		VT006204-x-GMR_49A01	w[1118]; P{y[+t7.7] w[+mC]=VT006204-p65.AD}attP40; P{y[+t7.7] w[+mC]=R49A01-GAL4.DBD}attP2
SS47929	Adult	Ryo Minegishi	Dickson	2	N	No	No	10.1101/2024.01.09.574419	Meissner; 2024	3031815	LBL38		VT008153-x-VT028861	w[1118]; P{y[+t7.7] w[+mC]=VT008153-p65.AD}attP40; P{y[+t7.7] w[+mC]=VT028861-GAL4.DBD}attP2
SS48157	Adult	Masayoshi Ito	Rubin	2	N	No	No	10.1101/2024.01.09.574419	Meissner; 2024	3030922	SIP017, AOTU011		VT020713-x-VT049493	w[1118]; P{y[+t7.7] w[+mC]=VT020713-p65.AD}attP40/CyO; P{y[+t7.7] w[+mC]=VT049493-GAL4.DBD}attP2/TM6B, Tb[1]
SS48192	Adult	Masayoshi Ito	Rubin	1	N	No	No	10.1101/2024.01.09.574419	Meissner; 2024	3030610	SMP055		GMR_41F02-x-VT034811	w[1118]; P{y[+t7.7] w[+mC]=R41F02-p65.AD}attP40; P{y[+t7.7] w[+mC]=VT034811-GAL4.DBD}attP2
SS48194	Adult	Masayoshi Ito	Rubin	1	N	No	No	10.1101/2024.01.09.574419	Meissner; 2024	3030611	AVLP538, 5-HTPLP01	891603228, 5813016933, 5813057579	GMR_52H01-x-VT019079	w[1118]; P{y[+t7.7] w[+mC]=R52H01-p65.AD}attP40/CyO; P{y[+t7.7] w[+mC]=VT019079-GAL4.DBD}attP2/TM6B, Tb[1]
SS48262	Adult	DI	DI	1	N	No	No	10.1101/2024.01.09.574419	Meissner; 2024	3030997	LT-3leg		GMR_17D02-x-GMR_13C08	w[1118]; P{y[+t7.7] w[+mC]=R17D02-p65.AD}attP40; P{y[+t7.7] w[+mC]=R13C08-GAL4.DBD}attP2
SS48301	Adult	DI	DI	2	N	No	No	10.1101/2024.01.09.574419	Meissner; 2024	3027690	DNp38		GMR_85F12-x-GMR_31B08	w[1118]; P{y[+t7.7] w[+mC]=R85F12-p65.AD}attP40; P{y[+t7.7] w[+mC]=R31B08-GAL4.DBD}attP2
SS48402	Adult	Ryo Minegishi	Dickson	2	N	No	No	10.1101/2024.01.09.574419	Meissner; 2024	3031830	SN_mixed		GMR_73C04-x-VT049978	w[1118]; P{y[+t7.7] w[+mC]=R73C04-p65.AD}attP40; P{y[+t7.7] w[+mC]=VT049978-GAL4.DBD}attP2
SS48413	Adult	Ryo Minegishi	Dickson	1	N	Yes	No	10.1101/2024.01.09.574419	Meissner; 2024	3031835	LBI57		GMR_83A11-x-GMR_87G04	w[1118]; P{y[+t7.7] w[+mC]=R83A11-p65.AD}attP40; P{y[+t7.7] w[+mC]=R87G04-GAL4.DBD}attP2
SS48416	Adult	Jens Goldammer	Rubin	1	N	No	No	10.1101/2024.01.09.574419	Meissner; 2024	3039312	IB099?		VT041427-x-GMR_56H09	w[1118]; P{y[+t7.7] w[+mC]=VT041427-p65.AD}attP40/CyO; P{y[+t7.7] w[+mC]=R56H09-GAL4.DBD}attP2/TM6B, Tb[1]
SS48427	Adult	Jens Goldammer	Rubin	1	N	No	No	10.1101/2024.01.09.574419	Meissner; 2024	3027807	PS284 (PS281-PS285)		VT042835-x-GMR_30A07	w[1118]; P{y[+t7.7] w[+mC]=VT042835-p65.AD}attP40; P{y[+t7.7] w[+mC]=R30A07-GAL4.DBD}attP2/TM6B, Tb[1]
SS48616	Adult	Ryo Minegishi	Dickson	2	N	No	No	10.1101/2024.01.09.574419	Meissner; 2024	3028482	LUL86		VT057295-x-VT050273	w; VT057295-p65ADZp in attP40; VT050273-ZpGDBD in attP2
SS48635	Adult	Ryo Minegishi	Dickson	2	N	No	No	10.1101/2024.01.09.574419	Meissner; 2024	3029370	LBL35		VT063314-x-VT000605	w[1118]; P{y[+t7.7] w[+mC]=VT063314-p65.AD}attP40; P{y[+t7.7] w[+mC]=VT000605-GAL4.DBD}attP2
SS48636	Adult	Ryo Minegishi	Dickson	2	N	No	No	10.1101/2024.01.09.574419	Meissner; 2024	3029376	LBL35		VT063314-x-GMR_18G08	w[1118]; P{y[+t7.7] w[+mC]=VT063314-p65.AD}attP40; P{y[+t7.7] w[+mC]=R18G08-GAL4.DBD}attP2
SS48638	Adult	Ryo Minegishi	Dickson	1	N	Yes	No	10.1101/2024.01.09.574419	Meissner; 2024	3028657	LUL51, LUL52, LUL167		VT050112-x-VT064581	w[1118]; P{y[+t7.7] w[+mC]=VT050112-p65.AD}attP40; P{y[+t7.7] w[+mC]=VT064581-GAL4.DBD}attP2
SS48644	Adult	Ryo Minegishi	Dickson	2	N	No	No	10.1101/2024.01.09.574419	Meissner; 2024	3028663	LBI50		VT006480-x-GMR_94E11	w[1118]; P{y[+t7.7] w[+mC]=VT006480-p65.AD}attP40; P{y[+t7.7] w[+mC]=R94E11-GAL4.DBD}attP2/TM6B, Tb[1]
SS48648	Adult	Ryo Minegishi	Dickson	2	N	No	No	10.1101/2024.01.09.574419	Meissner; 2024	3029116	LBL41, LUL38		GMR_11C05-x-GMR_48H01	w[1118]; P{y[+t7.7] w[+mC]=R11C05-p65.AD}attP40; P{y[+t7.7] w[+mC]=R48H01-GAL4.DBD}attP2
SS48649	Adult	Ryo Minegishi	Dickson	1	N	Yes	No	10.1101/2024.01.09.574419	Meissner; 2024	3029086	LBL35		GMR_18G08-x-VT063314	w[1118]; P{y[+t7.7] w[+mC]=R18G08-p65.AD}attP40/CyO, P{w[+mC]=2xTb[1]-RFP}CyO; P{y[+t7.7] w[+mC]=VT063314-GAL4.DBD}attP2
SS48678	Adult	Ryo Minegishi	Dickson	1	N	Yes	No	10.1101/2024.01.09.574419	Meissner; 2024	3031730	LUL134		VT014336-x-VT025925	w[1118]; P{y[+t7.7] w[+mC]=VT014336-p65.AD}attP40; P{y[+t7.7] w[+mC]=VT025925-GAL4.DBD}attP2/TM6B, Tb[1]
SS48727	Adult	Masayoshi Ito	Rubin	2	N	No	No	10.1101/2024.01.09.574419	Meissner; 2024	3030925	WED149		VT032805-x-VT026012	w[1118]; P{y[+t7.7] w[+mC]=VT032805-p65.AD}attP40; P{y[+t7.7] w[+mC]=VT026012-GAL4.DBD}attP2/TM6B, Tb[1]
SS48743	Adult	Kaiyu Wang	Dickson	1	N	No	Yes	10.1101/2024.01.09.574419	Meissner; 2024	3027861			VT022289-x-VT021854	w[1118]; P{y[+t7.7] w[+mC]=VT022289-p65.AD}attP40/CyO; P{y[+t7.7] w[+mC]=VT021854-GAL4.DBD}attP2/TM6B, Tb[1]
SS48747	Adult	Masayoshi Ito	Rubin	1	N	No	No	10.1101/2024.01.09.574419	Meissner; 2024	3030617	CL343, CL344		VT021854-x-VT022290	w[1118]; P{y[+t7.7] w[+mC]=VT021854-p65.AD}attP40/CyO; P{y[+t7.7] w[+mC]=VT022290-GAL4.DBD}attP2
SS48753	Adult	Masayoshi Ito	Rubin	1	N	No	Yes	10.1101/2024.01.09.574419	Meissner; 2024	3030620	PS196		GMR_10B07-x-VT045669	w[1118]; P{y[+t7.7] w[+mC]=R10B07-p65.AD}attP40/CyO, P{w[+mC]=2xTb[1]-RFP}CyO; P{y[+t7.7] w[+mC]=VT045669-GAL4.DBD}attP2
SS48979	Adult	Jens Goldammer	Rubin	1	N	No	Yes	10.1101/2024.01.09.574419	Meissner; 2024	3027769	OCG02		VT031409-x-VT000877	w[1118]; P{y[+t7.7] w[+mC]=VT031409-p65.AD}attP40; P{y[+t7.7] w[+mC]=VT000877-GAL4.DBD}attP2
SS49051	Adult	DI	DI	1	N	No	No	10.1101/2024.01.09.574419	Meissner; 2024	3027779	DNp11		GMR_18G08-x-VT017682	w[1118]; P{y[+t7.7] w[+mC]=R18G08-p65.AD}attP40/CyO, P{w[+mC]=2xTb[1]-RFP}CyO; P{y[+t7.7] w[+mC]=VT017682-GAL4.DBD}attP2
SS49157	Adult	Ryo Minegishi	Dickson	1	N	No	No	10.1101/2024.01.09.574419	Meissner; 2024	3031843	LBI24		VT034810-x-GMR_71D01	w[1118]; P{y[+t7.7] w[+mC]=VT034810-p65.AD}attP40; P{y[+t7.7] w[+mC]=R71D01-GAL4.DBD}attP2
SS49159	Adult	Ryo Minegishi	Dickson	2	N	No	No	10.1101/2024.01.09.574419	Meissner; 2024	3031820	LBA56		VT037865-x-VT046795	w[1118]; P{y[+t7.7] w[+mC]=VT037865-p65.AD}attP40; P{y[+t7.7] w[+mC]=VT046795-GAL4.DBD}attP2
SS49190	Adult	Ryo Minegishi	Dickson	1	N	Yes	No	10.1101/2024.01.09.574419	Meissner; 2024	3032073	LUL9		VT063982-x-GMR_17H12	w[1118]; P{y[+t7.7] w[+mC]=VT063982-p65.AD}attP40/CyO, P{w[+mC]=2xTb[1]-RFP}CyO; P{y[+t7.7] w[+mC]=R17H12-GAL4.DBD}attP2/TM6B, Tb[1]
SS49220	Adult	Ryo Minegishi	Dickson	1	N	Yes	No	10.1101/2024.01.09.574419	Meissner; 2024	3030365	LUL114, LUL116		VT064246-x-VT050139	w[1118]; P{y[+t7.7] w[+mC]=VT064246-p65.AD}attP40; P{y[+t7.7] w[+mC]=VT050139-GAL4.DBD}attP2
SS49386	Adult	Masayoshi Ito	Rubin	1	N	No	No	10.1101/2024.01.09.574419	Meissner; 2024	3030630	LAL072		VT013611-x-GMR_83B02	w[1118]; P{y[+t7.7] w[+mC]=VT013611-p65.AD}attP40/CyO; P{y[+t7.7] w[+mC]=R83B02-GAL4.DBD}attP2
SS49406	Adult	Masayoshi Ito	Rubin	2	N	No	No	10.1101/2024.01.09.574419	Meissner; 2024	3030635	PS099		GMR_46F02-x-VT039961	w[1118]; P{y[+t7.7] w[+mC]=R46F02-p65.AD}attP40; P{y[+t7.7] w[+mC]=VT039961-GAL4.DBD}attP2
SS49630	Adult	Jens Goldammer	Rubin	1	N	No	Yes	10.1101/2024.01.09.574419	Meissner; 2024	3028127	PLP248		VT041887-x-GMR_33C10	w[1118]; P{y[+t7.7] w[+mC]=VT041887-p65.AD}attP40; P{y[+t7.7] w[+mC]=R33C10-GAL4.DBD}attP2
SS49658	Adult	Jens Goldammer	Rubin	2	N	No	No	10.1101/2024.01.09.574419	Meissner; 2024	3038992	WED076, PS115		GMR_93A07-x-GMR_53C02	w[1118]; P{y[+t7.7] w[+mC]=R93A07-p65.AD}attP40/CyO; P{y[+t7.7] w[+mC]=R53C02-GAL4.DBD}attP2/TM6, Tb[1]
SS49909	Adult	Jens Goldammer	Rubin	2	N	No	No	10.1101/2024.01.09.574419	Meissner; 2024	3028121	PS280		GMR_14C08-x-VT040026	w[1118]; P{y[+t7.7] w[+mC]=R14C08-p65.AD}attP40/CyO, P{w[+mC]=2xTb[1]-RFP}CyO; P{y[+t7.7] w[+mC]=VT040026-GAL4.DBD}attP2/TM6B, Tb[1]
SS49915	Adult	Jens Goldammer	Rubin	2	N	No	No	10.1101/2024.01.09.574419	Meissner; 2024	3039313		1197571795	GMR_46C02-x-GMR_95F09	w[1118]; P{y[+t7.7] w[+mC]=R46C02-p65.AD}attP40/CyO, P{w[+mC]=2xTb[1]-RFP}CyO; P{y[+t7.7] w[+mC]=R95F09-GAL4.DBD}attP2
SS49923	Adult	Jens Goldammer	Rubin	1	N	No	Yes	10.1101/2024.01.09.574419	Meissner; 2024	3028131		1220416666	GMR_84B09-x-GMR_16E11	w[1118]; P{y[+t7.7] w[+mC]=R84B09-p65.AD}attP40; P{y[+t7.7] w[+mC]=R16E11-GAL4.DBD}attP2
SS49951	Adult	Masayoshi Ito	Rubin	1	N	No	No	10.1101/2024.01.09.574419	Meissner; 2024	3030640	CRE080		GMR_22D04-x-VT008691	w[1118]; P{y[+t7.7] w[+mC]=R22D04-p65.AD}attP40; P{y[+t7.7] w[+mC]=VT008691-GAL4.DBD}attP2
SS49952	Adult	Masayoshi Ito	Rubin	2	N	No	No	10.1101/2024.01.09.574419	Meissner; 2024	3030668	LAL093, LAL094		GMR_24H08-x-GMR_31A11	w[1118]; P{y[+t7.7] w[+mC]=R24H08-p65.AD}attP40; P{y[+t7.7] w[+mC]=R31A11-GAL4.DBD}attP2
SS49970	Adult	Masayoshi Ito	Rubin	1	N	No	No	10.1101/2024.01.09.574419	Meissner; 2024	3030934	SMP082		GMR_78E09-x-VT062645	w[1118]; P{y[+t7.7] w[+mC]=R78E09-p65.AD}JK22C/CyO; P{y[+t7.7] w[+mC]=VT062645-GAL4.DBD}attP2/TM6B, Tb[1]
SS49971	Adult	Masayoshi Ito	Rubin	1	N	No	Yes	10.1101/2024.01.09.574419	Meissner; 2024	3030935	SLP111_a?, SLP111_B?		GMR_78G04-x-GMR_36G04	w[1118]; P{y[+t7.7] w[+mC]=R78G04-p65.AD}attP40; P{y[+t7.7] w[+mC]=R36G04-GAL4.DBD}attP2
SS49978	Adult	Ryo Minegishi	Dickson	1	N	No	No	10.1101/2024.01.09.574419	Meissner; 2024	3029093	LUL15		VT037575-x-VT032228	w[1118]; P{y[+t7.7] w[+mC]=VT037575-p65.AD}attP40; P{y[+t7.7] w[+mC]=VT032228-GAL4.DBD}attP2
SS50012	Adult	Ryo Minegishi	Dickson	1	N	No	No	10.1101/2024.01.09.574419	Meissner; 2024	3029478	LBI45, LBI61		VT039485-x-VT008992	w[1118]; P{y[+t7.7] w[+mC]=VT039485-p65.AD}attP40; P{y[+t7.7] w[+mC]=VT008992-GAL4.DBD}attP2
SS50022	Adult	Ryo Minegishi	Dickson	2	N	No	No	10.1101/2024.01.09.574419	Meissner; 2024	3028552	LUL62		VT023810-x-VT039623	w[1118]; P{y[+t7.7] w[+mC]=VT023810-p65.AD}attP40; P{y[+t7.7] w[+mC]=VT039623-GAL4.DBD}attP2/TM6B, Tb[1]
SS50173	Adult	Jens Goldammer	Rubin	2	N	No	No	10.1101/2024.01.09.574419	Meissner; 2024	3028130		2005894552	GMR_47A08-x-GMR_83D12	w[1118]; P{y[+t7.7] w[+mC]=R47A08-p65.AD}JK22C; P{y[+t7.7] w[+mC]=R83D12-GAL4.DBD}attP2
SS50176	Adult	Jens Goldammer	Rubin	2	N	No	No	10.1101/2024.01.09.574419	Meissner; 2024	3039150		5813078530, 2002463508, 1908023418, 2003136306, 1939054081, 1499087499, 1529436280, 1625619163, contra: 5812990987	GMR_49C05-x-GMR_42B05	w[1118]; P{y[+t7.7] w[+mC]=R49C05-p65.AD}attP40; P{y[+t7.7] w[+mC]=R42B05-GAL4.DBD}attP2
SS50188	Adult	Kaiyu Wang	Dickson	1	N	No	Yes	10.1101/2024.01.09.574419	Meissner; 2024	3030244	LH_LN		VT008881-x-VT021854	w[1118]; P{y[+t7.7] w[+mC]=VT008881-p65.AD}attP40; P{y[+t7.7] w[+mC]=VT021854-GAL4.DBD}attP2
SS50191	Adult	Kaiyu Wang	Dickson	1	N	No	Yes	10.1101/2024.01.09.574419	Meissner; 2024	3029787			VT043689-x-VT021854	w[1118]; P{y[+t7.7] w[+mC]=VT043689-p65.AD}attP40/CyO P{w[+mC]=2xTb[1]-RFP}CyO; P{y[+t7.7] w[+mC]=VT021854-GAL4.DBD}attP2/TM6B, Tb[1]
SS50195	Adult	Kaiyu Wang	Dickson	2	N	No	No	10.1101/2024.01.09.574419	Meissner; 2024	3030255	AN, vlpr_LN		GMR_70E08-x-GMR_76E09	w[1118]; P{y[+t7.7] w[+mC]=R70E08-p65.AD}attP40; P{y[+t7.7] w[+mC]=R76E09-GAL4.DBD}attP2/TM6B, Tb[1]
SS50197	Adult	Kaiyu Wang	Dickson	2	N	No	No	10.1101/2024.01.09.574419	Meissner; 2024	3029800	CC, VNC_MN		GMR_70E08-x-GMR_49G02	w[1118]; P{y[+t7.7] w[+mC]=R70E08-p65.AD}attP40; P{y[+t7.7] w[+mC]=R49G02-GAL4.DBD}attP2
SS50201	Adult	Kaiyu Wang	Dickson	2	N	No	No	10.1101/2024.01.09.574419	Meissner; 2024	3029804	VNC_MN		GMR_70E08-x-GMR_76E07	w[1118]; P{y[+t7.7] w[+mC]=R70E08-p65.AD}attP40; P{y[+t7.7] w[+mC]=R76E07-GAL4.DBD}attP2
SS50207	Adult	Kaiyu Wang	Dickson	1	N	Yes	No	10.1101/2024.01.09.574419	Meissner; 2024	3028341	vpoDN	5813057864	GMR_31D07-x-VT045670	w[1118]; P{y[+t7.7] w[+mC]=R31D07-p65.AD}attP40; P{y[+t7.7] w[+mC]=VT045670-GAL4.DBD}attP2
SS50215	Adult	Kaiyu Wang	Dickson	1	N	No	Yes	10.1101/2024.01.09.574419	Meissner; 2024	3029797	OL		GMR_95A10-x-GMR_24E07	w[1118]; P{y[+t7.7] w[+mC]=R95A10-p65.AD}attP40/CyO, P{w[+mC]=2xTb[1]-RFP}CyO; P{y[+t7.7] w[+mC]=R24E07-GAL4.DBD}attP2
SS50218	Adult	Kaiyu Wang	Dickson	1	N	No	No	10.1101/2024.01.09.574419	Meissner; 2024	3029808	AN		GMR_1A02-x-GMR_70E08	w[1118]; P{y[+t7.7] w[+mC]=R1A02-p65.AD}attP40; P{y[+t7.7] w[+mC]=R70E08-GAL4.DBD}attP2/TM6B, Tb[1]
SS50258	Adult	Kaiyu Wang	Dickson	3	N	No	Yes	10.1101/2024.01.09.574419	Meissner; 2024	3027862			GMR_60G04-x-VT028270	w; 60G04-p65ADZp in attP40/CyO; VT028270-ZpGdbd in attP2/TM6B
SS50268	Adult	Kaiyu Wang	Dickson	1	N	No	No	10.1101/2024.01.09.574419	Meissner; 2024	3030072			VT017240-x-VT040934	w[1118]; P{y[+t7.7] w[+mC]=VT017240-p65.AD}attP40/CyO, P{w[+mC]=2xTb[1]-RFP}CyO; P{y[+t7.7] w[+mC]=VT040934-GAL4.DBD}attP2/TM6B, Tb[1]
SS50281	Adult	Ryo Minegishi	Dickson	2	N	No	No	10.1101/2024.01.09.574419	Meissner; 2024	3036760	LUL164		VT057295-x-GMR_85G10	w[1118]; P{y[+t7.7] w[+mC]=VT057295-p65.AD}attP40; P{y[+t7.7] w[+mC]=R85G10-GAL4.DBD}attP2/TM6B, Tb[1]
SS50313	Adult	Ryo Minegishi	Dickson	1	N	Yes	No	10.1101/2024.01.09.574419	Meissner; 2024	3036623	LUL163, LUL175		VT029359-x-VT007780	w[1118]; P{y[+t7.7] w[+mC]=VT029359-p65.AD}attP40; P{y[+t7.7] w[+mC]=VT007780-GAL4.DBD}attP2
SS50329	Adult	Ryo Minegishi	Dickson	1	N	Yes	No	10.1101/2024.01.09.574419	Meissner; 2024	3034267	LUL31, LUL32		GMR_85G10-x-VT025930	w[1118]; P{y[+t7.7] w[+mC]=R85G10-p65.AD}attP40; P{y[+t7.7] w[+mC]=VT025930-GAL4.DBD}attP2
SS50333	Adult	Aljoscha Nern	Rubin	1	N	No	No	10.1101/2024.01.09.574419	Meissner; 2024	3030936	aDT4 (AC)		VT008267-x-VT027804	w[1118]; P{y[+t7.7] w[+mC]=VT008267-p65.AD}attP40; P{y[+t7.7] w[+mC]=VT027804-GAL4.DBD}attP2/TM6B, Tb[1]
SS50336	Adult	Masayoshi Ito	Rubin	1	N	No	No	10.1101/2024.01.09.574419	Meissner; 2024	3030648	PPL030?, PPL031?		VT040232-x-VT058873	w[1118]; P{y[+t7.7] w[+mC]=VT040232-p65.AD}attP40; P{y[+t7.7] w[+mC]=VT058873-GAL4.DBD}attP2/TM6B, Tb[1]
SS50337	Adult	Masayoshi Ito	Rubin	1	N	No	Yes	10.1101/2024.01.09.574419	Meissner; 2024	3030649	LAL119		VT044650-x-VT029309	w[1118]; P{y[+t7.7] w[+mC]=VT044650-p65.AD}attP40/CyO; P{y[+t7.7] w[+mC]=VT029309-GAL4.DBD}attP2/TM6B, Tb[1]
SS50351	Adult	Masayoshi Ito	Rubin	2	N	No	No	10.1101/2024.01.09.574419	Meissner; 2024	3030678	SMP394?, SMP395?, SMP396?, SMP397?, SMP398?		VT029765-x-VT016971	w[1118]; P{y[+t7.7] w[+mC]=VT029765-p65.AD}attP40/CyO; P{y[+t7.7] w[+mC]=VT016971-GAL4.DBD}attP2/TM6B, Tb[1]
SS50353	Adult	Kaiyu Wang	Dickson	1	N	No	No	10.1101/2024.01.09.574419	Meissner; 2024	3030206			VT016841-x-VT027804	w[1118]; P{y[+t7.7] w[+mC]=VT016841-p65.AD}attP40/CyO, P{w[+mC]=2xTb[1]-RFP}CyO; P{y[+t7.7] w[+mC]=VT027804-GAL4.DBD}attP2
SS50362	Adult	Masayoshi Ito/Aljoscha Nern	Rubin	1	N	No	No	10.1101/2024.01.09.574419	Meissner; 2024	3030652			GMR_31E06-x-VT058919	w[1118]; P{y[+t7.7] w[+mC]=R31E06-p65.AD}attP40; P{y[+t7.7] w[+mC]=VT058919-GAL4.DBD}attP2
SS50567	Adult	Aljoscha Nern	Rubin	2	N	No	No	10.1101/2024.01.09.574419	Meissner; 2024	3030127	AVLP531		GMR_92B02-x-GMR_22F05	w[1118]; P{y[+t7.7] w[+mC]=R92B02-p65.AD}attP40; P{y[+t7.7] w[+mC]=R22F05-GAL4.DBD}attP2
SS50738	Adult	Jens Goldammer	Rubin	1	N	No	No	10.1101/2024.01.09.574419	Meissner; 2024	3028134	VES012		GMR_20G05-x-VT009152	w[1118]; P{y[+t7.7] w[+mC]=R20G05-p65.AD}attP40; P{y[+t7.7] w[+mC]=VT009152-GAL4.DBD}attP2/TM6B, Tb[1]
SS50747	Adult	Jens Goldammer	Rubin	1	N	No	No	10.1101/2024.01.09.574419	Meissner; 2024	3028132	VES037		GMR_85F12-x-GMR_16D09	w[1118]; P{y[+t7.7] w[+mC]=R85F12-p65.AD}attP40; P{y[+t7.7] w[+mC]=R16D09-GAL4.DBD}attP2
SS50750	Adult	Jens Goldammer	Rubin	2	N	No	No	10.1101/2024.01.09.574419	Meissner; 2024	3039638	IB012		VT030528-x-GMR_67D09	w[1118]; P{y[+t7.7] w[+mC]=VT030528-p65.AD}attP40; P{y[+t7.7] w[+mC]=R67D09-GAL4.DBD}attP2/TM6B, Tb[1]
SS50756	Adult	Jens Goldammer	Rubin	1	N	No	No	10.1101/2024.01.09.574419	Meissner; 2024	3028129	ATL014		VT036874-x-GMR_73C04	w[1118]; P{y[+t7.7] w[+mC]=VT036874-p65.AD}attP40; P{y[+t7.7] w[+mC]=R73C04-GAL4.DBD}attP2/TM6B, Tb[1]
SS50766	Adult	Jens Goldammer	Rubin	2	N	No	No	10.1101/2024.01.09.574419	Meissner; 2024	3039097	PS276		GMR_70G12-x-GMR_13C04	w[1118]; P{y[+t7.7] w[+mC]=R70G12-p65.AD}attP40; P{y[+t7.7] w[+mC]=R13C04-GAL4.DBD}attP2
SS50767	Adult	Masayoshi Ito	Rubin	1	N	No	No	10.1101/2024.01.09.574419	Meissner; 2024	3030192	AVLP451		GMR_65A11-x-VT033912	w[1118]; P{y[+t7.7] w[+mC]=R65A11-p65.AD}attP40; P{y[+t7.7] w[+mC]=VT033912-GAL4.DBD}attP2
SS50785	Adult	Kaiyu Wang	Dickson	1	N	No	No	10.1101/2024.01.09.574419	Meissner; 2024	3029719			VT030303-x-VT021854	w[1118]; P{y[+t7.7] w[+mC]=VT030303-p65.AD}attP40; P{y[+t7.7] w[+mC]=VT021854-GAL4.DBD}attP2
SS50786	Adult	Kaiyu Wang	Dickson	1	N	No	Yes	10.1101/2024.01.09.574419	Meissner; 2024	3029786			VT008281-x-VT021854	w[1118]; P{y[+t7.7] w[+mC]=VT008281-p65.AD}attP40; P{y[+t7.7] w[+mC]=VT021854-GAL4.DBD}attP2
SS50802	Adult	Kaiyu Wang	Dickson	2	N	No	No	10.1101/2024.01.09.574419	Meissner; 2024	3029809	VNC_LN		VT045670-x-GMR_65G11	w; VT045670-p65ADZp in attP40; 65G11-ZpGdbd in attP2
SS50814	Adult	Ryo Minegishi	Dickson	2	N	No	No	10.1101/2024.01.09.574419	Meissner; 2024	3030413	LBA60, LBL42		VT044650-x-VT021799	w[1118]; P{y[+t7.7] w[+mC]=VT044650-p65.AD}attP40; P{y[+t7.7] w[+mC]=VT021799-GAL4.DBD}attP2
SS50841	Adult	Ryo Minegishi	Dickson	2	N	No	No	10.1101/2024.01.09.574419	Meissner; 2024	3031420	SN_mixed		VT021799-x-VT024016	w[1118]; P{y[+t7.7] w[+mC]=VT021799-p65.AD}attP40; P{y[+t7.7] w[+mC]=VT024016-GAL4.DBD}attP2
SS50865	Adult	Ryo Minegishi	Dickson	1	N	Yes	No	10.1101/2024.01.09.574419	Meissner; 2024	3030498	MN		GMR_71E06-x-GMR_49A01	w[1118]; P{y[+t7.7] w[+mC]=R71E06-p65.AD}attP40; P{y[+t7.7] w[+mC]=R49A01-GAL4.DBD}attP2
SS50889	Adult	Kaiyu Wang	Dickson	2	Y	No	No	10.1101/2024.01.09.574419	Meissner; 2024	3027866			VT038210-x-VT017682	w[1118]; P{y[+t7.7] w[+mC]=VT038210-p65.AD}attP40/CyO, P{w[+mC]=2xTb[1]-RFP}CyO; P{y[+t7.7] w[+mC]=VT017682-GAL4.DBD}attP2
SS50896	Adult	Kaiyu Wang	Dickson	2	Y	No	No	10.1101/2024.01.09.574419	Meissner; 2024	3027873			VT048418-x-VT007170	w[1118]; P{y[+t7.7] w[+mC]=VT048418-p65.AD}attP40; P{y[+t7.7] w[+mC]=VT007170-GAL4.DBD}attP2
SS50897	Adult	Kaiyu Wang	Dickson	1	Y	No	No	10.1101/2024.01.09.574419	Meissner; 2024	3027874			VT007170-x-VT048418	w[1118]; P{y[+t7.7] w[+mC]=VT007170-p65.AD}attP40/CyO; P{y[+t7.7] w[+mC]=VT048418-GAL4.DBD}attP2/TM6B, Tb[1]
SS50898	Adult	Kaiyu Wang	Dickson	1	Y	No	No	10.1101/2024.01.09.574419	Meissner; 2024	3027875			VT007170-x-VT020610	w[1118]; P{y[+t7.7] w[+mC]=VT007170-p65.AD}attP40/CyO, P{w[+mC]=2xTb[1]-RFP}CyO; P{y[+t7.7] w[+mC]=VT020610-GAL4.DBD}attP2
SS50907	Adult	Kaiyu Wang	Dickson	1	N	Yes	No	10.1101/2024.01.09.574419	Meissner; 2024	3027884	VNC_LN		VT033618-x-VT045235	w[1118]; P{y[+t7.7] w[+mC]=VT033618-p65.AD}attP40/CyO; P{y[+t7.7] w[+mC]=VT045235-GAL4.DBD}attP2/TM6B, Tb[1]
SS50914	Adult	Kaiyu Wang	Dickson	1	N	No	No	10.1101/2024.01.09.574419	Meissner; 2024	3027891			VT050405-x-GMR_42G02	w[1118]; P{y[+t7.7] w[+mC]=VT050405-p65.AD}attP40/CyO; P{y[+t7.7] w[+mC]=R42G02-GAL4.DBD}attP2
SS50915	Adult	Kaiyu Wang	Dickson	1	N	No	No	10.1101/2024.01.09.574419	Meissner; 2024	3027892			VT050405-x-VT028324	w[1118]; P{y[+t7.7] w[+mC]=VT050405-p65.AD}attP40/CyO; P{y[+t7.7] w[+mC]=VT028324-GAL4.DBD}attP2
SS50916	Adult	Kaiyu Wang	Dickson	1	N	Yes	No	10.1101/2024.01.09.574419	Meissner; 2024	3027893	WN_LN_mixed		VT040346-x-VT018875	w[1118]; P{y[+t7.7] w[+mC]=VT040346-p65.AD}attP40/CyO, P{w[+mC]=2xTb[1]-RFP}CyO; P{y[+t7.7] w[+mC]=VT018875-GAL4.DBD}attP2
SS50919	Adult	Kaiyu Wang	Dickson	1	N	Yes	No	10.1101/2024.01.09.574419	Meissner; 2024	3027896	WN_LN_mixed		VT040347-x-VT018875	w[1118]; P{y[+t7.7] w[+mC]=VT040347-p65.AD}attP40/CyO; P{y[+t7.7] w[+mC]=VT018875-GAL4.DBD}attP2/TM6B, Tb[1]
SS50921	Adult	Kaiyu Wang	Dickson	1	Y	No	No	10.1101/2024.01.09.574419	Meissner; 2024	3027898			GMR_60G04-x-VT025602	w; 60G04-p65ADZp in attP40/CyO; VT025602-ZpGdbd in attP2/TM6B
SS50928	Adult	Kaiyu Wang	Dickson	1	N	No	No	10.1101/2024.01.09.574419	Meissner; 2024	3027905	VNC		VT028270-x-GMR_20H05	w[1118]; P{y[+t7.7] w[+mC]=VT028270-p65.AD}attP40; P{y[+t7.7] w[+mC]=R20H05-GAL4.DBD}attP2
SS50931	Adult	Kaiyu Wang	Dickson	2	N	No	Yes	10.1101/2024.01.09.574419	Meissner; 2024	3027908			VT008469-x-VT002064	w[1118]; P{y[+t7.7] w[+mC]=VT008469-p65.AD}attP40/CyO; P{y[+t7.7] w[+mC]=VT002064-GAL4.DBD}attP2/TM6B, Tb[1]
SS50937	Adult	Kaiyu Wang	Dickson	3	N	No	No	10.1101/2024.01.09.574419	Meissner; 2024	3027914			VT025602-x-GMR_60G04	w; VT025602-p65ADZp in attP40/CyO; 60G04-ZpGdbd in attP2/TM6B
SS50938	Adult	Kaiyu Wang	Dickson	1	N	No	No	10.1101/2024.01.09.574419	Meissner; 2024	3027915			VT043698-x-VT043699	w[1118]; P{y[+t7.7] w[+mC]=VT043698-p65.AD}attP40/CyO; P{y[+t7.7] w[+mC]=VT043699-GAL4.DBD}attP2/TM6B, Tb[1]
SS50940	Adult	Kaiyu Wang	Dickson	1	N	No	No	10.1101/2024.01.09.574419	Meissner; 2024	3027917	pMP		VT014708-x-VT046808	w[1118]; P{y[+t7.7] w[+mC]=VT014708-p65.AD}attP40/CyO; P{y[+t7.7] w[+mC]=VT046808-GAL4.DBD}attP2/TM6B, Tb[1]
SS50945	Adult	Kaiyu Wang	Dickson	1	N	No	No	10.1101/2024.01.09.574419	Meissner; 2024	3027922			VT050405-x-GMR_24A08	w[1118]; P{y[+t7.7] w[+mC]=VT050405-p65.AD}attP40; P{y[+t7.7] w[+mC]=R24A08-GAL4.DBD}attP2
SS50946	Adult	Kaiyu Wang	Dickson	1	Y	No	No	10.1101/2024.01.09.574419	Meissner; 2024	3027923			VT050405-x-GMR_40A01	w[1118]; P{y[+t7.7] w[+mC]=VT050405-p65.AD}attP40/CyO; P{y[+t7.7] w[+mC]=R40A01-GAL4.DBD}attP2
SS50947	Adult	Kaiyu Wang	Dickson	1	Y	No	No	10.1101/2024.01.09.574419	Meissner; 2024	3027924			VT050405-x-GMR_48A03	w[1118]; P{y[+t7.7] w[+mC]=VT050405-p65.AD}attP40/CyO; P{y[+t7.7] w[+mC]=R48A03-GAL4.DBD}attP2/TM6B, Tb[1]
SS50965	Adult	Ryo Minegishi	Dickson	1	N	Yes	No	10.1101/2024.01.09.574419	Meissner; 2024	3030781	LUL124		VT020956-x-VT050105	w[1118]; P{y[+t7.7] w[+mC]=VT020956-p65.AD}attP40/CyO, P{w[+mC]=2xTb[1]-RFP}CyO; P{y[+t7.7] w[+mC]=VT050105-GAL4.DBD}attP2
SS50991	Adult	Ryo Minegishi	Dickson	2	N	No	No	10.1101/2024.01.09.574419	Meissner; 2024	3030441	MN		VT064565-x-VT023830	w[1118]; P{y[+t7.7] w[+mC]=VT064565-p65.AD}attP40; P{y[+t7.7] w[+mC]=VT023830-GAL4.DBD}attP2/TM6B, Tb[1]
SS51006	Adult	Ryo Minegishi	Dickson	1	N	Yes	No	10.1101/2024.01.09.574419	Meissner; 2024	3031598			GMR_94E11-x-VT012717	w[1118]; P{y[+t7.7] w[+mC]=R94E11-p65.AD}attP40; P{y[+t7.7] w[+mC]=VT012717-GAL4.DBD}attP2
SS51105	Adult	Ryo Minegishi	Dickson	1	N	Yes	No	10.1101/2024.01.09.574419	Meissner; 2024	3031589	LBL40		GMR_24A02-x-VT009849	w[1118]; P{y[+t7.7] w[+mC]=R24A02-p65.AD}attP40; P{y[+t7.7] w[+mC]=VT009849-GAL4.DBD}attP2/TM6B, Tb[1]
SS51112	Adult	Ryo Minegishi	Dickson	1	N	Yes	No	10.1101/2024.01.09.574419	Meissner; 2024	3030955			GMR_54D09-x-VT000772	w[1118]; P{y[+t7.7] w[+mC]=R54D09-p65.AD}attP40; P{y[+t7.7] w[+mC]=VT000772-GAL4.DBD}attP2/TM6B, Tb[1]
SS51143	Adult	Jens Goldammer	Rubin	2	N	No	No	10.1101/2024.01.09.574419	Meissner; 2024	3039175	OCG08		VT025970-x-VT057298	w[1118]; P{y[+t7.7] w[+mC]=VT025970-p65.AD}attP40; P{y[+t7.7] w[+mC]=VT057298-GAL4.DBD}attP2/T(2;3)B3, CyO: TM6B, Tb[1]
SS51152	Adult	Jens Goldammer	Rubin	1	N	No	No	10.1101/2024.01.09.574419	Meissner; 2024	3039603	SMP455		GMR_24A08-x-VT020600	w[1118]; P{y[+t7.7] w[+mC]=R24A08-p65.AD}JK22C/CyO; P{y[+t7.7] w[+mC]=VT020600-GAL4.DBD}attP2/TM6B, Tb[1]
SS51169	Adult	Jens Goldammer	Rubin	1	N	No	No	10.1101/2024.01.09.574419	Meissner; 2024	3038993	ExR5		GMR_53C05-x-GMR_74C01	w[1118]; P{y[+t7.7] w[+mC]=R53C05-p65.AD}attP40/CyO; P{y[+t7.7] w[+mC]=R74C01-GAL4.DBD}attP2/TM6, Tb[1]
SS51173	Adult	Jens Goldammer	Rubin	1	N	No	Yes	10.1101/2024.01.09.574419	Meissner; 2024	3038999	SMP398		GMR_65H04-x-VT017183	w[1118]; P{y[+t7.7] w[+mC]=R65H04-p65.AD}JK22C/CyO; P{y[+t7.7] w[+mC]=VT017183-GAL4.DBD}attP2/TM6, Tb[1]
SS51247	Adult	Jens Goldammer	Rubin	2	N	No	No	10.1101/2024.01.09.574419	Meissner; 2024	3039227	IB061		VT057364-x-VT045615	w[1118]; P{y[+t7.7] w[+mC]=VT057364-p65.AD}attP40; P{y[+t7.7] w[+mC]=VT045615-GAL4.DBD}attP2/T(2;3)B3, CyO: TM6B, Tb[1]
SS51264	Adult	Jens Goldammer	Rubin	1	N	No	No	10.1101/2024.01.09.574419	Meissner; 2024	3038989	CL359		VT008277-x-GMR_26H07	w[1118]; P{y[+t7.7] w[+mC]=VT008277-p65.AD}attP40/CyO; P{y[+t7.7] w[+mC]=R26H07-GAL4.DBD}attP2/TM6, Tb[1]
SS51274	Adult	Jens Goldammer	Rubin	2	N	No	No	10.1101/2024.01.09.574419	Meissner; 2024	3038991	VES075		VT040044-x-GMR_34E12	w[1118]; P{y[+t7.7] w[+mC]=VT040044-p65.AD}attP40/CyO; P{y[+t7.7] w[+mC]=R34E12-GAL4.DBD}attP2/TM6, Tb[1]
SS51277	Adult	Jens Goldammer	Rubin	1	N	Yes	No	10.1101/2024.01.09.574419	Meissner; 2024	3039253	PS232		VT009674-x-GMR_12G09	w[1118]; P{y[+t7.7] w[+mC]=VT009674-p65.AD}attP40/CyO; P{y[+t7.7] w[+mC]=R12G09-GAL4.DBD}attP2/TM6B, Tb[1]
SS51305	Adult	Jens Goldammer	Rubin	2	N	No	No	10.1101/2024.01.09.574419	Meissner; 2024	3039003	CL111		GMR_93A07-x-VT037539	w[1118]; P{y[+t7.7] w[+mC]=R93A07-p65.AD}attP40/CyO; P{y[+t7.7] w[+mC]=VT037539-GAL4.DBD}attP2/TM6, Tb[1]
SS51359	Adult	Masayoshi Ito	Rubin	2	N	No	No	10.1101/2024.01.09.574419	Meissner; 2024	3030690			GMR_38F08-x-VT008473	w[1118]; P{y[+t7.7] w[+mC]=R38F08-p65.AD}attP40/CyO; P{y[+t7.7] w[+mC]=VT008473-GAL4.DBD}attP2/TM6B, Tb[1]
SS51474	Adult	Aljoscha Nern	Rubin	1	N	No	Yes	10.1101/2024.01.09.574419	Meissner; 2024	3030113	AVLP531		GMR_76B02-x-VT046049	w[1118]; P{y[+t7.7] w[+mC]=R76B02-p65.AD}attP40; P{y[+t7.7] w[+mC]=VT046049-GAL4.DBD}attP2
SS51519	Adult	DI	DI	2	N	No	No	10.1101/2024.01.09.574419	Meissner; 2024	3028400	AMNp sensory afferent, primary sensory		GMR_37D11-x-GMR_20F02	w[1118]; P{y[+t7.7] w[+mC]=R37D11-p65.AD}attP40; P{y[+t7.7] w[+mC]=R20F02-GAL4.DBD}attP2
SS51651	Adult	Kaiyu Wang	Dickson	2	N	No	No	10.1101/2024.01.09.574419	Meissner; 2024	3029679	DN, WN_LN_mixed		VT022098-x-VT001595	w[1118]; P{y[+t7.7] w[+mC]=VT022098-p65.AD}attP40; P{y[+t7.7] w[+mC]=VT001595-GAL4.DBD}attP2
SS51661	Adult	Kaiyu Wang	Dickson	2	N	No	No	10.1101/2024.01.09.574419	Meissner; 2024	3029714	WN_LN_mixed		VT057294-x-VT021420	w[1118]; P{y[+t7.7] w[+mC]=VT057294-p65.AD}attP40; P{y[+t7.7] w[+mC]=VT021420-GAL4.DBD}attP2
SS51717	Adult	Kaiyu Wang	Dickson	1	N	No	No	10.1101/2024.01.09.574419	Meissner; 2024	3029700	WN_LN_mixed		VT057286-x-VT022098	w[1118]; P{y[+t7.7] w[+mC]=VT057286-p65.AD}attP40; P{y[+t7.7] w[+mC]=VT022098-GAL4.DBD}attP2
SS51727	Adult	Kaiyu Wang	Dickson	1	N	No	No	10.1101/2024.01.09.574419	Meissner; 2024	3029683	WN_LN_mixed		VT059427-x-VT042732	w[1118]; P{y[+t7.7] w[+mC]=VT059427-p65.AD}attP40; P{y[+t7.7] w[+mC]=VT042732-GAL4.DBD}attP2
SS51734	Adult	Kaiyu Wang	Dickson	2	N	No	No	10.1101/2024.01.09.574419	Meissner; 2024	3029670	SEZ_LN		VT023795-x-VT016116	w[1118]; P{y[+t7.7] w[+mC]=VT023795-p65.AD}attP40; P{y[+t7.7] w[+mC]=VT016116-GAL4.DBD}attP2
SS51738	Adult	Kaiyu Wang	Dickson	1	Y	No	No	10.1101/2024.01.09.574419	Meissner; 2024	3029684	FB		VT023795-x-VT042732	w[1118]; P{y[+t7.7] w[+mC]=VT023795-p65.AD}attP40; P{y[+t7.7] w[+mC]=VT042732-GAL4.DBD}attP2
SS51749	Adult	Kaiyu Wang	Dickson	2	N	No	No	10.1101/2024.01.09.574419	Meissner; 2024	3029780	T2_LN		VT015971-x-VT021420	w[1118]; P{y[+t7.7] w[+mC]=VT015971-p65.AD}attP40; P{y[+t7.7] w[+mC]=VT021420-GAL4.DBD}attP2
SS51774	Adult	Kaiyu Wang	Dickson	1	N	No	No	10.1101/2024.01.09.574419	Meissner; 2024	3029765	WN_LN_mixed		VT042732-x-VT041041	w[1118]; P{y[+t7.7] w[+mC]=VT042732-p65.AD}attP40; P{y[+t7.7] w[+mC]=VT041041-GAL4.DBD}attP2
SS51824	Adult	Ryo Minegishi	Dickson	3	N	No	No	10.1101/2024.01.09.574419	Meissner; 2024	3031608	LBI71		VT029814-x-VT008992	w[1118]; P{y[+t7.7] w[+mC]=VT029814-p65.AD}attP40; P{y[+t7.7] w[+mC]=VT008992-GAL4.DBD}attP2
SS51827	Adult	Ryo Minegishi	Dickson	3	N	No	No	10.1101/2024.01.09.574419	Meissner; 2024	3031606	LUI20		VT018764-x-VT060202	w[1118]; P{y[+t7.7] w[+mC]=VT018764-p65.AD}attP40; P{y[+t7.7] w[+mC]=VT060202-GAL4.DBD}attP2
SS51867	Adult	Ryo Minegishi	Dickson	2	N	No	No	10.1101/2024.01.09.574419	Meissner; 2024	3030763	SN_mixed		GMR_14F05-x-VT063559	w[1118]; P{y[+t7.7] w[+mC]=R14F05-p65.AD}attP40; P{y[+t7.7] w[+mC]=VT063559-GAL4.DBD}attP2
SS51874	Adult	Ryo Minegishi	Dickson	1	N	No	No	10.1101/2024.01.09.574419	Meissner; 2024	3031802	MN		GMR_23C02-x-VT045565	w[1118]; P{y[+t7.7] w[+mC]=R23C02-p65.AD}attP40; P{y[+t7.7] w[+mC]=VT045565-GAL4.DBD}attP2
SS51893	Adult	Ryo Minegishi	Dickson	1	N	Yes	No	10.1101/2024.01.09.574419	Meissner; 2024	3030793	LUL121, LUL123		GMR_31F10-x-GMR_49C05	w; 31F10-p65ADZp in attP40; 49C05-ZpGdbd in attP2
SS51896	Adult	Ryo Minegishi	Dickson	2	N	No	No	10.1101/2024.01.09.574419	Meissner; 2024	3031819	LUI22		GMR_47A08-x-VT019307	w[1118]; P{y[+t7.7] w[+mC]=R47A08-p65.AD}JK22C/CyO, P{w[+mC]=2xTb[1]-RFP}CyO; P{y[+t7.7] w[+mC]=VT019307-GAL4.DBD}attP2
SS52124	Adult	Ryo Minegishi	Dickson	2	N	No	No	10.1101/2024.01.09.574419	Meissner; 2024	3031006	LUL132		GMR_65G02-x-GMR_92G09	w[1118]; P{y[+t7.7] w[+mC]=R65G02-p65.AD}attP40; P{y[+t7.7] w[+mC]=R92G09-GAL4.DBD}attP2
SS52172	Adult	Ryo Minegishi	Dickson	1	N	No	No	10.1101/2024.01.09.574419	Meissner; 2024	3035801	LUA17, LUA22, LUA23		VT012292-x-VT020714	w[1118]; P{y[+t7.7] w[+mC]=VT012292-p65.AD}attP40/CyO, P{w[+mC]=2xTb[1]-RFP}CyO; P{y[+t7.7] w[+mC]=VT020714-GAL4.DBD}attP2
SS52179	Adult	Ryo Minegishi	Dickson	2	N	No	No	10.1101/2024.01.09.574419	Meissner; 2024	3031806	LUL116		GMR_23E04-x-VT019841	w[1118]; P{y[+t7.7] w[+mC]=R23E04-p65.AD}JK22C; P{y[+t7.7] w[+mC]=VT019841-GAL4.DBD}attP2
SS52196	Adult	Ryo Minegishi	Dickson	1	N	Yes	No	10.1101/2024.01.09.574419	Meissner; 2024	3031005	LUL10		GMR_77B09-x-GMR_66B05	w[1118]; P{y[+t7.7] w[+mC]=R77B09-p65.AD}attP40/CyO, P{w[+mC]=2xTb[1]-RFP}CyO; P{y[+t7.7] w[+mC]=R66B05-GAL4.DBD}attP2/TM6B, Tb[1]
SS52396	Adult	DI	DI	1	N	No	No	10.1101/2024.01.09.574419	Meissner; 2024	3029058	primary sensory		VT008133-x-GMR_69H06	w[1118]; P{y[+t7.7] w[+mC]=VT008133-p65.AD}attP40; P{y[+t7.7] w[+mC]=R69H06-GAL4.DBD}attP2
SS52400	Adult	DI	DI	2	N	No	No	10.1101/2024.01.09.574419	Meissner; 2024	3029051	Haltere Afferent-primary sensory		VT014604-x-VT041657	w[1118]; P{y[+t7.7] w[+mC]=VT014604-p65.AD}attP40; P{y[+t7.7] w[+mC]=VT041657-GAL4.DBD}attP2
SS52470	Adult	Kaiyu Wang	Dickson	1	N	No	No	10.1101/2024.01.09.574419	Meissner; 2024	3029677	SEZ		VT040560-x-VT045584	w[1118]; P{y[+t7.7] w[+mC]=VT040560-p65.AD}attP40; P{y[+t7.7] w[+mC]=VT045584-GAL4.DBD}attP2
SS52482	Adult	Kaiyu Wang	Dickson	1	Y	Yes	No	10.1101/2024.01.09.574419	Meissner; 2024	3030076	WN		VT046248-x-VT051757	w[1118]; P{y[+t7.7] w[+mC]=VT046248-p65.AD}attP40; P{y[+t7.7] w[+mC]=VT051757-GAL4.DBD}attP2
SS52806	Adult	Ryo Minegishi	Dickson	1	N	No	No	10.1101/2024.01.09.574419	Meissner; 2024	3034261	LBI25		GMR_60C01-x-VT042835	w[1118]; P{y[+t7.7] w[+mC]=R60C01-p65.AD}attP40/CyO, P{2xTb[1]-RFP}CyO; P{y[+t7.7] w[+mC]=VT042835-GAL4.DBD}attP2
SS52827	Adult	Kaiyu Wang	Dickson	1	N	No	No	10.1101/2024.01.09.574419	Meissner; 2024	3029682	WN_LN_mixed		VT033912-x-VT025975	w[1118]; P{y[+t7.7] w[+mC]=VT033912-p65.AD}attP40; P{y[+t7.7] w[+mC]=VT025975-GAL4.DBD}attP2
SS52848	Adult	Kaiyu Wang	Dickson	2	N	No	No	10.1101/2024.01.09.574419	Meissner; 2024	3030064	WN_LN_mixed		VT004196-x-VT050248	w[1118]; P{y[+t7.7] w[+mC]=VT004196-p65.AD}attP40; P{y[+t7.7] w[+mC]=VT050248-GAL4.DBD}attP2
SS52849	Adult	Kaiyu Wang	Dickson	2	N	No	No	10.1101/2024.01.09.574419	Meissner; 2024	3029674	VNC		VT015434-x-VT045281	w[1118]; P{y[+t7.7] w[+mC]=VT015434-p65.AD}attP40; P{y[+t7.7] w[+mC]=VT045281-GAL4.DBD}attP2
SS52884	Adult	Kaiyu Wang	Dickson	1	N	No	Yes	10.1101/2024.01.09.574419	Meissner; 2024	3030099	pSP_PN?		VT033912-x-VT050233	w[1118]; P{y[+t7.7] w[+mC]=VT033912-p65.AD}attP40/CyO, P{w[+mC]=2xTb[1]-RFP}CyO; P{y[+t7.7] w[+mC]=VT050233-GAL4.DBD}attP2/TM6B, Tb[1]
SS52894	Adult	Kaiyu Wang	Dickson	1	N	No	No	10.1101/2024.01.09.574419	Meissner; 2024	3030091	CC		VT023795-x-VT008288	w[1118]; P{y[+t7.7] w[+mC]=VT023795-p65.AD}attP40; P{y[+t7.7] w[+mC]=VT008288-GAL4.DBD}attP2
SS52905	Adult	Kaiyu Wang	Dickson	1	N	Yes	No	10.1101/2024.01.09.574419	Meissner; 2024	3030008			VT025975-x-VT026839	w[1118]; P{y[+t7.7] w[+mC]=VT025975-p65.AD}attP40; P{y[+t7.7] w[+mC]=VT026839-GAL4.DBD}attP2/TM6B, Tb[1]
SS52928	Adult	Kaiyu Wang	Dickson	1	N	No	Yes	10.1101/2024.01.09.574419	Meissner; 2024	3029669	pMP		VT041421-x-VT007746	w[1118]; P{y[+t7.7] w[+mC]=VT041421-p65.AD}attP40/CyO, P{w[+mC]=2xTb[1]-RFP}CyO; P{y[+t7.7] w[+mC]=VT007746-GAL4.DBD}attP2
SS53326	Adult	Gerry Rubin	Rubin	1	N	No	No	10.1101/2024.01.09.574419	Meissner; 2024	3029382	single cell type		GMR_23E10-x-GMR_12D12	w[1118]; P{y[+t7.7] w[+mC]=R23E10-p65.AD}JK22C; P{y[+t7.7] w[+mC]=R12D12-GAL4.DBD}attP2
SS53403	Adult	DI	DI	1	N	Yes	No	10.1101/2024.01.09.574419	Meissner; 2024	3029831	Haltere Afferent-primary sensory		VT014604-x-VT033490	w[1118]; P{y[+t7.7] w[+mC]=VT014604-p65.AD}attP40; P{y[+t7.7] w[+mC]=VT033490-GAL4.DBD}attP2
SS53436	Adult	DI	DI	2	N	No	No	10.1101/2024.01.09.574419	Meissner; 2024	3029838	DNb05		GMR_73C04-x-VT004417	w[1118]; P{y[+t7.7] w[+mC]=R73C04-p65.AD}attP40; P{y[+t7.7] w[+mC]=VT004417-GAL4.DBD}attP2
SS53439	Adult	DI	DI	2	N	No	No	10.1101/2024.01.09.574419	Meissner; 2024	3029825	DNg34, ascending neuron		GMR_83A12-x-VT033647	w[1118]; P{y[+t7.7] w[+mC]=R83A12-p65.AD}attP40/CyO, P{w[+mC]=2xTb[1]-RFP}CyO; P{y[+t7.7] w[+mC]=VT033647-GAL4.DBD}attP2
SS53449	Adult	Kaiyu Wang	Dickson	3	Y	No	No	10.1101/2024.01.09.574419	Meissner; 2024	3028343	vpoDN	5813057864	GMR_31D07-x-GMR_10A09	w[1118]; P{y[+t7.7] w[+mC]=R31D07-p65.AD}attP40/CyO; P{y[+t7.7] w[+mC]=R10A09-GAL4.DBD}attP2
SS53450	Adult	Kaiyu Wang	Dickson	1	Y	No	No	10.1101/2024.01.09.574419	Meissner; 2024	3028344	vpoDN	5813057864	VT005404-x-GMR_10A09	w[1118]; P{y[+t7.7] w[+mC]=VT005404-p65.AD}attP40; P{y[+t7.7] w[+mC]=R10A09-GAL4.DBD}attP2
SS53456	Adult	Kaiyu Wang	Dickson	2	N	No	No	10.1101/2024.01.09.574419	Meissner; 2024	3028351			GMR_20G10-x-VT045598	w[1118]; P{y[+t7.7] w[+mC]=R20G10-p65.AD}attP40; P{y[+t7.7] w[+mC]=VT045598-GAL4.DBD}attP2/TM6B, Tb[1]
SS53463	Adult	Kaiyu Wang	Dickson	2	N	No	No	10.1101/2024.01.09.574419	Meissner; 2024	3028358	WN_LN_mixed		VT054914-x-GMR_22B12	w[1118]; P{y[+t7.7] w[+mC]=VT054914-p65.AD}attP40/CyO; P{y[+t7.7] w[+mC]=R22B12-GAL4.DBD}attP2/TM6B, Tb[1]
SS53493	Adult	Ryo Minegishi	Dickson	2	N	No	No	10.1101/2024.01.09.574419	Meissner; 2024	3035824	LUL64, LUL65		VT044650-x-VT013602	w[1118]; P{y[+t7.7] w[+mC]=VT044650-p65.AD}attP40; P{y[+t7.7] w[+mC]=VT013602-GAL4.DBD}attP2
SS53702	Adult	Gerry Rubin	Rubin	2	N	No	No	10.1101/2024.01.09.574419	Meissner; 2024	3029300	FB2J?, FB2F_c, FB2H_a		GMR_33E06-x-GMR_38E08	w[1118]; P{y[+t7.7] w[+mC]=R38E08-GAL4.DBD}attP2 PBac{y[+mDint2] w[+mC]=R33E06-p65.AD}VK00027/TM3, Sb[1]
SS53822	Adult	Ryo Minegishi	Dickson	2	N	No	No	10.1101/2024.01.09.574419	Meissner; 2024	3034162	LUA1		VT008452-x-VT055826	w[1118]; P{y[+t7.7] w[+mC]=VT008452-p65.AD}attP40; P{y[+t7.7] w[+mC]=VT055826-GAL4.DBD}attP2/TM6B, Tb[1]
SS53890	Adult	Ryo Minegishi	Dickson	2	N	No	No	10.1101/2024.01.09.574419	Meissner; 2024	3035825	LBA29		VT043920-x-VT017682	w[1118]; P{y[+t7.7] w[+mC]=VT043920-p65.AD}attP40; P{y[+t7.7] w[+mC]=VT017682-GAL4.DBD}attP2
SS53940	Adult	Ryo Minegishi	Dickson	1	N	Yes	No	10.1101/2024.01.09.574419	Meissner; 2024	3035827	LUL34		VT065320-x-GMR_87G04	w[1118]; P{y[+t7.7] w[+mC]=VT065320-p65.AD}attP40/CyO, P{w[+mC]=2xTb[1]-RFP}CyO; P{y[+t7.7] w[+mC]=R87G04-GAL4.DBD}attP2
SS54002	Adult	Ryo Minegishi	Dickson	2	N	No	No	10.1101/2024.01.09.574419	Meissner; 2024	3042316			GMR_31A06-x-GMR_76E11	w[1118]; P{y[+t7.7] w[+mC]=R31A06-p65.AD}attP40; P{y[+t7.7] w[+mC]=R76E11-GAL4.DBD}attP2
SS54009	Adult	Ryo Minegishi	Dickson	2	N	No	No	10.1101/2024.01.09.574419	Meissner; 2024	3035839	LUL27		GMR_46E07-x-GMR_38B09	w[1118]; P{y[+t7.7] w[+mC]=R46E07-p65.AD}attP40; P{y[+t7.7] w[+mC]=R38B09-GAL4.DBD}attP2
SS54096	Adult	Kaiyu Wang	Dickson	2	N	No	No	10.1101/2024.01.09.574419	Meissner; 2024	3029994	AN		VT003477-x-VT063982	w[1118]; P{y[+t7.7] w[+mC]=VT003477-p65.AD}attP40; P{y[+t7.7] w[+mC]=VT063982-GAL4.DBD}attP2
SS54102	Adult	Kaiyu Wang	Dickson	2	N	No	No	10.1101/2024.01.09.574419	Meissner; 2024	3030060	VNC_LN		VT028452-x-VT000606	w[1118]; P{y[+t7.7] w[+mC]=VT028452-p65.AD}attP40; P{y[+t7.7] w[+mC]=VT000606-GAL4.DBD}attP2
SS54126	Adult	Kaiyu Wang	Dickson	2	N	No	No	10.1101/2024.01.09.574419	Meissner; 2024	3030216	pMP_PN		VT012292-x-VT046792	w[1118]; P{y[+t7.7] w[+mC]=VT012292-p65.AD}attP40/CyO, P{w[+mC]=2xTb[1]-RFP}CyO; P{y[+t7.7] w[+mC]=VT046792-GAL4.DBD}attP2/TM6B, Tb[1]
SS54140	Adult	Kaiyu Wang	Dickson	2	N	No	No	10.1101/2024.01.09.574419	Meissner; 2024	3029987	vlpr_LN		VT046792-x-VT017645	w[1118]; P{y[+t7.7] w[+mC]=VT046792-p65.AD}attP40; P{y[+t7.7] w[+mC]=VT017645-GAL4.DBD}attP2
SS54144	Adult	Kaiyu Wang	Dickson	1	N	Yes	No	10.1101/2024.01.09.574419	Meissner; 2024	3030084	T1_LN		VT044959-x-VT017645	w[1118]; P{y[+t7.7] w[+mC]=VT044959-p65.AD}attP40; P{y[+t7.7] w[+mC]=VT017645-GAL4.DBD}attP2
SS54152	Adult	Kaiyu Wang	Dickson	1	N	Yes	No	10.1101/2024.01.09.574419	Meissner; 2024	3030093			VT044959-x-VT003477	w[1118]; P{y[+t7.7] w[+mC]=VT044959-p65.AD}attP40/CyO, P{2xTb[1]-RFP}CyO; P{y[+t7.7] w[+mC]=VT003477-GAL4.DBD}attP2
SS54164	Adult	Kaiyu Wang	Dickson	1	N	No	No	10.1101/2024.01.09.574419	Meissner; 2024	3029977	trachea		VT056785-x-VT025999	w[1118]; P{y[+t7.7] w[+mC]=VT056785-p65.AD}attP40; P{y[+t7.7] w[+mC]=VT025999-GAL4.DBD}attP2/TM6B, Tb[1]
SS54169	Adult	Kaiyu Wang	Dickson	1	N	No	No	10.1101/2024.01.09.574419	Meissner; 2024	3030006	Abg_AN		VT017645-x-VT026179	w[1118]; P{y[+t7.7] w[+mC]=VT017645-p65.AD}attP40; P{y[+t7.7] w[+mC]=VT026179-GAL4.DBD}attP2/TM6B, Tb[1]
SS54172	Adult	Kaiyu Wang	Dickson	2	N	No	No	10.1101/2024.01.09.574419	Meissner; 2024	3030102	VNC		VT044959-x-VT026179	w; VT044959-p65ADZp in attP40/CyOTb; VT026179-ZpGdbd in attP2/TM6B
SS54173	Adult	Kaiyu Wang	Dickson	1	N	Yes	No	10.1101/2024.01.09.574419	Meissner; 2024	3030227	VNC		VT048942-x-VT026179	w[1118]; P{y[+t7.7] w[+mC]=VT048942-p65.AD}attP40; P{y[+t7.7] w[+mC]=VT026179-GAL4.DBD}attP2
SS54183	Adult	Kaiyu Wang	Dickson	1	N	Yes	No	10.1101/2024.01.09.574419	Meissner; 2024	3029981	T1_LN		VT017645-x-VT044959	w[1118]; P{y[+t7.7] w[+mC]=VT017645-p65.AD}attP40; P{y[+t7.7] w[+mC]=VT044959-GAL4.DBD}attP2/TM6B, Tb[1]
SS54184	Adult	Kaiyu Wang	Dickson	1	N	Yes	No	10.1101/2024.01.09.574419	Meissner; 2024	3029982			VT003477-x-VT044959	w[1118]; P{y[+t7.7] w[+mC]=VT003477-p65.AD}attP40; P{y[+t7.7] w[+mC]=VT044959-GAL4.DBD}attP2/TM6B, Tb[1]
SS54200	Adult	Kaiyu Wang	Dickson	1	N	No	No	10.1101/2024.01.09.574419	Meissner; 2024	3029964			VT017645-x-VT038111	w[1118]; P{y[+t7.7] w[+mC]=VT017645-p65.AD}attP40; P{y[+t7.7] w[+mC]=VT038111-GAL4.DBD}attP2
SS54203	Adult	Kaiyu Wang	Dickson	1	N	Yes	No	10.1101/2024.01.09.574419	Meissner; 2024	3030058	VNC_LN		VT044959-x-VT038111	w[1118]; P{y[+t7.7] w[+mC]=VT044959-p65.AD}attP40; P{y[+t7.7] w[+mC]=VT038111-GAL4.DBD}attP2
SS54308	Adult	Gerry Rubin	Rubin	2	N	No	No	10.1101/2024.01.09.574419	Meissner; 2024	3029399	dFB		VT042831-x-GMR_23E10	w[1118]; P{y[+t7.7] w[+mC]=VT042831-p65.AD}attP40; P{y[+t7.7] w[+mC]=R23E10-GAL4.DBD}attP2
SS54316	Adult	Gerry Rubin	Rubin	2	N	No	No	10.1101/2024.01.09.574419	Meissner; 2024	3029401	FB7A		VT025720-x-GMR_23E10	w[1118]; P{y[+t7.7] w[+mC]=VT025720-p65.AD}attP40; P{y[+t7.7] w[+mC]=R23E10-GAL4.DBD}attP2
SS54468	Adult	DI	DI	1	N	No	No	10.1101/2024.01.09.574419	Meissner; 2024	3029917	primary sensory		VT014604-x-VT037539	w[1118]; P{y[+t7.7] w[+mC]=VT014604-p65.AD}attP40/CyO, P{w[+mC]=2xTb[1]-RFP}CyO; P{y[+t7.7] w[+mC]=VT037539-GAL4.DBD}attP2
SS54476	Adult	DI	DI	1	N	No	No	10.1101/2024.01.09.574419	Meissner; 2024	3029921	primary sensory		VT014604-x-GMR_60A06	w[1118]; P{y[+t7.7] w[+mC]=VT014604-p65.AD}attP40; P{y[+t7.7] w[+mC]=R60A06-GAL4.DBD}attP2
SS54709	Adult	Kaiyu Wang	Dickson	2	N	No	No	10.1101/2024.01.09.574419	Meissner; 2024	3030283	WN_LN_mixed		VT023490-x-VT043086	w[1118]; P{y[+t7.7] w[+mC]=VT023490-p65.AD}attP40/CyO, P{w[+mC]=2xTb[1]-RFP}CyO; P{y[+t7.7] w[+mC]=VT043086-GAL4.DBD}attP2
SS54723	Adult	Kaiyu Wang	Dickson	2	N	No	No	10.1101/2024.01.09.574419	Meissner; 2024	3030281			VT019018-x-VT023490	w[1118]; P{y[+t7.7] w[+mC]=VT019018-p65.AD}attP40; P{y[+t7.7] w[+mC]=VT023490-GAL4.DBD}attP2
SS54724	Adult	Kaiyu Wang	Dickson	1	N	Yes	No	10.1101/2024.01.09.574419	Meissner; 2024	3030001	AN		VT026663-x-VT026537	w[1118]; P{y[+t7.7] w[+mC]=VT026663-p65.AD}attP40; P{y[+t7.7] w[+mC]=VT026537-GAL4.DBD}attP2/TM6B, Tb[1]
SS54725	Adult	Kaiyu Wang	Dickson	1	N	No	No	10.1101/2024.01.09.574419	Meissner; 2024	3030394	AN		VT063956-x-VT026537	w[1118]; P{y[+t7.7] w[+mC]=VT063956-p65.AD}attP40; P{y[+t7.7] w[+mC]=VT026537-GAL4.DBD}attP2/TM6B, Tb[1]
SS54728	Adult	Kaiyu Wang	Dickson	1	N	Yes	No	10.1101/2024.01.09.574419	Meissner; 2024	3029993	WN_LN_mixed		VT043699-x-VT048828	w[1118]; P{y[+t7.7] w[+mC]=VT043699-p65.AD}attP40/CyO, P{2xTb[1]-RFP}CyO; P{y[+t7.7] w[+mC]=VT048828-GAL4.DBD}attP2
SS54729	Adult	Kaiyu Wang	Dickson	1	N	Yes	No	10.1101/2024.01.09.574419	Meissner; 2024	3030387	VNC_MN		VT006460-x-VT048828	w[1118]; P{y[+t7.7] w[+mC]=VT006460-p65.AD}attP40/CyO, P{w[+mC]=2xTb[1]-RFP}CyO; P{y[+t7.7] w[+mC]=VT048828-GAL4.DBD}attP2
SS54751	Adult	Kaiyu Wang	Dickson	1	N	No	Yes	10.1101/2024.01.09.574419	Meissner; 2024	3030364			VT020732-x-VT037223	w[1118]; P{y[+t7.7] w[+mC]=VT020732-p65.AD}attP40; P{y[+t7.7] w[+mC]=VT037223-GAL4.DBD}attP2
SS54758	Adult	Kaiyu Wang	Dickson	2	N	No	No	10.1101/2024.01.09.574419	Meissner; 2024	3030392	SEZ_PN		VT012318-x-VT017683	w[1118]; P{y[+t7.7] w[+mC]=VT012318-p65.AD}attP40; P{y[+t7.7] w[+mC]=VT017683-GAL4.DBD}attP2
SS54759	Adult	Kaiyu Wang	Dickson	1	N	No	No	10.1101/2024.01.09.574419	Meissner; 2024	3030096			VT020732-x-VT017683	w[1118]; P{y[+t7.7] w[+mC]=VT020732-p65.AD}attP40; P{y[+t7.7] w[+mC]=VT017683-GAL4.DBD}attP2
SS54760	Adult	Kaiyu Wang	Dickson	1	N	Yes	No	10.1101/2024.01.09.574419	Meissner; 2024	3030284	AN		VT026537-x-VT026663	w[1118]; P{y[+t7.7] w[+mC]=VT026537-p65.AD}attP40; P{y[+t7.7] w[+mC]=VT026663-GAL4.DBD}attP2
SS54765	Adult	Kaiyu Wang	Dickson	1	N	No	No	10.1101/2024.01.09.574419	Meissner; 2024	3030286	AN		VT026537-x-VT063956	w[1118]; P{y[+t7.7] w[+mC]=VT026537-p65.AD}attP40; P{y[+t7.7] w[+mC]=VT063956-GAL4.DBD}attP2
SS54774	Adult	Kaiyu Wang	Dickson	2	N	No	No	10.1101/2024.01.09.574419	Meissner; 2024	3030404	SEZ_PN		VT017683-x-VT012318	w[1118]; P{y[+t7.7] w[+mC]=VT017683-p65.AD}attP40; P{y[+t7.7] w[+mC]=VT012318-GAL4.DBD}attP2/TM6B, Tb[1]
SS54803	Adult	Kaiyu Wang	Dickson	1	N	No	No	10.1101/2024.01.09.574419	Meissner; 2024	3029967			VT025997-x-VT030609	w[1118]; P{y[+t7.7] w[+mC]=VT025997-p65.AD}attP40; P{y[+t7.7] w[+mC]=VT030609-GAL4.DBD}attP2
SS54804	Adult	Kaiyu Wang	Dickson	2	N	No	No	10.1101/2024.01.09.574419	Meissner; 2024	3030410	SEZ_PN		VT012289-x-VT037537	w[1118]; P{y[+t7.7] w[+mC]=VT012289-p65.AD}attP40; P{y[+t7.7] w[+mC]=VT037537-GAL4.DBD}attP2
SS54806	Adult	Kaiyu Wang	Dickson	2	N	No	No	10.1101/2024.01.09.574419	Meissner; 2024	3030292	5TH?		VT057465-x-VT042837	w[1118]; P{y[+t7.7] w[+mC]=VT057465-p65.AD}attP40; P{y[+t7.7] w[+mC]=VT042837-GAL4.DBD}attP2
SS54815	Adult	Kaiyu Wang	Dickson	1	N	No	No	10.1101/2024.01.09.574419	Meissner; 2024	3030384			VT039567-x-VT033629	w[1118]; P{y[+t7.7] w[+mC]=VT039567-p65.AD}attP40; P{y[+t7.7] w[+mC]=VT033629-GAL4.DBD}attP2
SS54816	Adult	Kaiyu Wang	Dickson	1	N	No	Yes	10.1101/2024.01.09.574419	Meissner; 2024	3030385			VT027804-x-VT033629	w[1118]; P{y[+t7.7] w[+mC]=VT027804-p65.AD}attP40; P{y[+t7.7] w[+mC]=VT033629-GAL4.DBD}attP2
SS54838	Adult	Kaiyu Wang	Dickson	1	N	No	No	10.1101/2024.01.09.574419	Meissner; 2024	3030368	vlpr_PN		VT049362-x-VT020714	w[1118]; P{y[+t7.7] w[+mC]=VT049362-p65.AD}attP40; P{y[+t7.7] w[+mC]=VT020714-GAL4.DBD}attP2
SS54839	Adult	Kaiyu Wang	Dickson	2	N	No	No	10.1101/2024.01.09.574419	Meissner; 2024	3029976			VT043086-x-VT025718	w[1118]; P{y[+t7.7] w[+mC]=VT043086-p65.AD}attP40; P{y[+t7.7] w[+mC]=VT025718-GAL4.DBD}attP2
SS54840	Adult	Kaiyu Wang	Dickson	1	N	No	No	10.1101/2024.01.09.574419	Meissner; 2024	3030278			VT019018-x-VT025718	w[1118]; P{y[+t7.7] w[+mC]=VT019018-p65.AD}attP40; P{y[+t7.7] w[+mC]=VT025718-GAL4.DBD}attP2
SS54841	Adult	Kaiyu Wang	Dickson	2	N	No	No	10.1101/2024.01.09.574419	Meissner; 2024	3030070	VNC		VT000831-x-VT027015	w[1118]; P{y[+t7.7] w[+mC]=VT000831-p65.AD}attP40/CyO; P{y[+t7.7] w[+mC]=VT027015-GAL4.DBD}attP2
SS54864	Adult	Kaiyu Wang	Dickson	1	N	No	No	10.1101/2024.01.09.574419	Meissner; 2024	3030375			VT063627-x-VT050658	w[1118]; P{y[+t7.7] w[+mC]=VT063627-p65.AD}attP40; P{y[+t7.7] w[+mC]=VT050658-GAL4.DBD}attP2
SS54868	Adult	Kaiyu Wang	Dickson	1	N	No	Yes	10.1101/2024.01.09.574419	Meissner; 2024	3030207			VT033629-x-VT027804	w[1118]; P{y[+t7.7] w[+mC]=VT033629-p65.AD}attP40/CyO, P{w[+mC]=2xTb[1]-RFP}CyO; P{y[+t7.7] w[+mC]=VT027804-GAL4.DBD}attP2
SS54966	Adult	DI	DI	1	N	No	No	10.1101/2024.01.09.574419	Meissner; 2024	3030530	Prosternal afferent		VT000108-x-VT039470	w[1118]; P{y[+t7.7] w[+mC]=VT000108-p65.AD}attP40; P{y[+t7.7] w[+mC]=VT039470-GAL4.DBD}attP2
SS54967	Adult	DI	DI	2	N	No	No	10.1101/2024.01.09.574419	Meissner; 2024	3030572	Prosternal afferent		VT000108-x-GMR_31B01	w[1118]; P{y[+t7.7] w[+mC]=VT000108-p65.AD}attP40/CyO; P{y[+t7.7] w[+mC]=R31B01-GAL4.DBD}attP2
SS54979	Adult	DI	DI	1	N	No	No	10.1101/2024.01.09.574419	Meissner; 2024	3030567	WN-IN (post-DNg02 small)		VT058560-x-GMR_85H06	w[1118]; P{y[+t7.7] w[+mC]=VT058560-p65.AD}attP40; P{y[+t7.7] w[+mC]=R85H06-GAL4.DBD}attP2
SS54995	Adult	DI	DI	1	N	No	No	10.1101/2024.01.09.574419	Meissner; 2024	3030535	Prosternal afferent		VT039470-x-VT004456	w[1118]; P{y[+t7.7] w[+mC]=VT039470-p65.AD}attP40; P{y[+t7.7] w[+mC]=VT004456-GAL4.DBD}attP2
SS54997	Adult	DI	DI	1	N	No	No	10.1101/2024.01.09.574419	Meissner; 2024	3030573	Prosternal afferent		VT039470-x-GMR_31B01	w[1118]; P{y[+t7.7] w[+mC]=VT039470-p65.AD}attP40; P{y[+t7.7] w[+mC]=R31B01-GAL4.DBD}attP2
SS55000	Adult	DI	DI	1	N	No	No	10.1101/2024.01.09.574419	Meissner; 2024	3030576	WMN (steering)		VT027804-x-GMR_38A11	w[1118]; P{y[+t7.7] w[+mC]=VT027804-p65.AD}attP40; P{y[+t7.7] w[+mC]=R38A11-GAL4.DBD}attP2
SS55002	Adult	DI	DI	2	N	No	No	10.1101/2024.01.09.574419	Meissner; 2024	3030540	WN-IN (post-DNg02 small)		GMR_12E04-x-VT058560	w[1118]; P{y[+t7.7] w[+mC]=R12E04-p65.AD}attP40; P{y[+t7.7] w[+mC]=VT058560-GAL4.DBD}attP2
SS55005	Adult	DI	DI	2	N	No	No	10.1101/2024.01.09.574419	Meissner; 2024	3030568	WN-IN (post-DNg02 small)		GMR_12E04-x-GMR_85H06	w[1118]; P{y[+t7.7] w[+mC]=R12E04-p65.AD}attP40; P{y[+t7.7] w[+mC]=R85H06-GAL4.DBD}attP2
SS55009	Adult	DI	DI	2	N	No	No	10.1101/2024.01.09.574419	Meissner; 2024	3030569	WN-IN (post-DNg02 small)		GMR_15C12-x-GMR_24F10	w[1118]; P{y[+t7.7] w[+mC]=R15C12-p65.AD}attP40; P{y[+t7.7] w[+mC]=R24F10-GAL4.DBD}attP2
SS55017	Adult	DI	DI	2	N	No	No	10.1101/2024.01.09.574419	Meissner; 2024	3042973	WN-IN (post DNg02)		GMR_24F10-x-VT058560	w[1118]; P{y[+t7.7] w[+mC]=R24F10-p65.AD}attP40; P{y[+t7.7] w[+mC]=VT058560-GAL4.DBD}attP2
SS55018	Adult	DI	DI	2	N	No	No	10.1101/2024.01.09.574419	Meissner; 2024	3032339	WN-IN (post-DNg02 small)		GMR_24F10-x-GMR_15C12	w[1118]; P{y[+t7.7] w[+mC]=R24F10-p65.AD}attP40; P{y[+t7.7] w[+mC]=R15C12-GAL4.DBD}attP2
SS55026	Adult	DI	DI	1	N	No	No	10.1101/2024.01.09.574419	Meissner; 2024	3030305	WN-IN (cross)		GMR_30H02-x-GMR_22E12	w[1118]; P{y[+t7.7] w[+mC]=R22E12-GAL4.DBD}attP2 PBac{y[+mDint2] w[+mC]=R30H02-p65.AD}VK00027
SS55029	Adult	DI	DI	1	N	No	No	10.1101/2024.01.09.574419	Meissner; 2024	3030558	WN-IN (cross)		GMR_65H03-x-GMR_30H02	w[1118]; P{y[+t7.7] w[+mC]=R65H03-p65.AD}attP40; P{y[+t7.7] w[+mC]=R30H02-GAL4.DBD}attP2
SS55037	Adult	DI	DI	1	N	No	No	10.1101/2024.01.09.574419	Meissner; 2024	3030551	T2LFN		GMR_78B06-x-GMR_15A04	w[1118]; P{y[+t7.7] w[+mC]=R78B06-p65.AD}attP40; P{y[+t7.7] w[+mC]=R15A04-GAL4.DBD}attP2
SS55042	Adult	DI	DI	1	N	No	No	10.1101/2024.01.09.574419	Meissner; 2024	3030550	T2LFN		GMR_95F12-x-GMR_15A04	w[1118]; P{y[+t7.7] w[+mC]=R95F12-p65.AD}attP40; P{y[+t7.7] w[+mC]=R15A04-GAL4.DBD}attP2
SS55043	Adult	Jens Goldammer	Rubin	1	N	No	Yes	10.1101/2024.01.09.574419	Meissner; 2024	3039155	ATL024 or IB042		GMR_TDC2-x-GMR_24C05	w[1118]; P{y[+t7.7] w[+mC]=Tdc2-p65.AD}attP40/CyO; P{y[+t7.7] w[+mC]=R24C05-GAL4.DBD}attP2/TM6B, Tb[1]
SS55134	Adult	Gerry Rubin	Rubin	1	N	No	Yes	10.1101/2024.01.09.574419	Meissner; 2024	3030041	FB8G		GMR_65C02-x-VT063306	w[1118]; P{y[+t7.7] w[+mC]=R65C02-p65.AD}attP40; P{y[+t7.7] w[+mC]=VT063306-GAL4.DBD}attP2/TM6B, Tb[1]
SS55145	Adult	Kaiyu Wang	Dickson	1	N	Not determined	Not determined	10.1101/2024.01.09.574419	Meissner; 2024	3029903	AbG_LN		VT020823-x-VT044969	w[1118]; P{y[+t7.7] w[+mC]=VT020823-p65.AD}attP40; P{y[+t7.7] w[+mC]=VT044969-GAL4.DBD}attP2
SS55231	Adult	Kaiyu Wang	Dickson	2	N	No	Yes	10.1101/2024.01.09.574419	Meissner; 2024	3030370			VT025966-x-VT043699	w[1118]; P{y[+t7.7] w[+mC]=VT025966-p65.AD}attP40; P{y[+t7.7] w[+mC]=VT043699-GAL4.DBD}attP2
SS55245	Adult	Kaiyu Wang	Dickson	1	N	Yes	No	10.1101/2024.01.09.574419	Meissner; 2024	3030380	VNC		VT058383-x-VT016254	w[1118]; P{y[+t7.7] w[+mC]=VT058383-p65.AD}attP40; P{y[+t7.7] w[+mC]=VT016254-GAL4.DBD}attP2
SS55246	Adult	Kaiyu Wang	Dickson	2	N	No	No	10.1101/2024.01.09.574419	Meissner; 2024	3030377			VT025718-x-VT023490	w[1118]; P{y[+t7.7] w[+mC]=VT025718-p65.AD}attP40/CyO, P{w[+mC]=2xTb[1]-RFP}CyO; P{y[+t7.7] w[+mC]=VT023490-GAL4.DBD}attP2
SS55250	Adult	Kaiyu Wang	Dickson	1	N	No	No	10.1101/2024.01.09.574419	Meissner; 2024	3030361	SEZ_LN		VT027273-x-VT040564	w[1118]; P{y[+t7.7] w[+mC]=VT027273-p65.AD}attP40; P{y[+t7.7] w[+mC]=VT040564-GAL4.DBD}attP2/TM6B, Tb[1]
SS55257	Adult	Kaiyu Wang	Dickson	2	N	No	No	10.1101/2024.01.09.574419	Meissner; 2024	3030390	WN_MN		GMR_78B06-x-VT048828	w[1118]; P{y[+t7.7] w[+mC]=R78B06-p65.AD}attP40; P{y[+t7.7] w[+mC]=VT048828-GAL4.DBD}attP2
SS55270	Adult	Kaiyu Wang	Dickson	2	N	No	No	10.1101/2024.01.09.574419	Meissner; 2024	3030977			VT040564-x-VT008424	w[1118]; P{y[+t7.7] w[+mC]=VT040564-p65.AD}attP40/CyO, P{w[+mC]=2xTb[1]-RFP}CyO; P{y[+t7.7] w[+mC]=VT008424-GAL4.DBD}attP2
SS55276	Adult	Kaiyu Wang	Dickson	1	N	No	Yes	10.1101/2024.01.09.574419	Meissner; 2024	3030287	AOTU		VT041421-x-VT016645	w[1118]; P{y[+t7.7] w[+mC]=VT041421-p65.AD}attP40; P{y[+t7.7] w[+mC]=VT016645-GAL4.DBD}attP2
SS55299	Adult	Kaiyu Wang	Dickson	3	Y	No	Yes	10.1101/2024.01.09.574419	Meissner; 2024	3030274			VT043699-x-VT006460	w; VT043699-p65ADZp in attP40/CyOTb; VT006460-ZpGDBD in attP2/TM6B
SS55316	Adult	Kaiyu Wang	Dickson	1	N	No	No	10.1101/2024.01.09.574419	Meissner; 2024	3030378			VT006460-x-VT050217	w[1118]; P{y[+t7.7] w[+mC]=VT006460-p65.AD}attP40/CyO, P{w[+mC]=2xTb[1]-RFP}CyO; P{y[+t7.7] w[+mC]=VT050217-GAL4.DBD}attP2
SS55349	Adult	Kaiyu Wang	Dickson	1	N	No	No	10.1101/2024.01.09.574419	Meissner; 2024	3030373	DN		VT031084-x-VT061709	w[1118]; P{y[+t7.7] w[+mC]=VT031084-p65.AD}attP40; P{y[+t7.7] w[+mC]=VT061709-GAL4.DBD}attP2/TM6B, Tb[1]
SS55394	Adult	Aljoscha Nern	Rubin	2	N	No	No	10.1101/2024.01.09.574419	Meissner; 2024	3030130	PLP248		VT041887-x-GMR_72A10	w[1118]; P{y[+t7.7] w[+mC]=VT041887-p65.AD}attP40; P{y[+t7.7] w[+mC]=R72A10-GAL4.DBD}attP2
SS55433	Adult	Aljoscha Nern	Rubin	1	N	No	No	10.1101/2024.01.09.574419	Meissner; 2024	3030071	PLP248		GMR_72A10-x-VT039959	w[1118]; P{y[+t7.7] w[+mC]=R72A10-p65.AD}attP40; P{y[+t7.7] w[+mC]=VT039959-GAL4.DBD}attP2
SS55460	Adult	DI	DI	1	N	No	No	10.1101/2024.01.09.574419	Meissner; 2024	3030556	DNg02x~19		GMR_49H08-x-GMR_42B02	w[1118]; P{y[+t7.7] w[+mC]=R49H08-p65.AD}attP40; P{y[+t7.7] w[+mC]=R42B02-GAL4.DBD}attP2
SS55587	Adult	DI	DI	1	N	No	No	10.1101/2024.01.09.574419	Meissner; 2024	3031737	DNa04 (subtype?)		GMR_26E02-x-VT043086	w[1118]; P{y[+t7.7] w[+mC]=R26E02-p65.AD}attP40/CyO, P{w[+mC]=2xTb[1]-RFP}CyO; P{y[+t7.7] w[+mC]=VT043086-GAL4.DBD}attP2
SS55960	Adult	DI	DI	2	N	No	No	10.1101/2024.01.09.574419	Meissner; 2024	3030549	DNp33		VT025934-x-GMR_59E04	w[1118]; P{y[+t7.7] w[+mC]=VT025934-p65.AD}attP40; P{y[+t7.7] w[+mC]=R59E04-GAL4.DBD}attP2
SS56056	Adult	Gerry Rubin	Rubin	1	N	No	Yes	10.1101/2024.01.09.574419	Meissner; 2024	3030319	FB6A		GMR_42H01-x-GMR_84C10	w[1118]; P{y[+t7.7] w[+mC]=R84C10-GAL4.DBD}attP2 PBac{y[+mDint2] w[+mC]=R42H01-p65.AD}VK00027
SS56181	Adult	DI	DI	2	N	No	No	10.1101/2024.01.09.574419	Meissner; 2024	3031008	DNp13	887195902	GMR_30C12-x-GMR_52F12	w[1118]; P{y[+t7.7] w[+mC]=R30C12-p65.AD}attP40; P{y[+t7.7] w[+mC]=R52F12-GAL4.DBD}attP2
SS56230	Adult	DI	DI	1	N	No	No	10.1101/2024.01.09.574419	Meissner; 2024	3031003	DNp03		VT002081-x-GMR_22D06	w[1118]; P{y[+t7.7] w[+mC]=VT002081-p65.AD}attP40/CyO, P{w[+mC]=2xTb[1]-RFP}CyO; P{y[+t7.7] w[+mC]=R22D06-GAL4.DBD}attP2
SS56320	Adult	Gerry Rubin	Rubin	1	N	No	No	10.1101/2024.01.09.574419	Meissner; 2024	3030476	FB21_a		GMR_33E06-x-VT029515	w[1118]; P{y[+t7.7] w[+mC]=VT029515-GAL4.DBD}attP2 PBac{y[+mDint2] w[+mC]=R33E06-p65.AD}VK00027
SS56423	Adult	Kaiyu Wang	Dickson	1	N	No	No	10.1101/2024.01.09.574419	Meissner; 2024	3031526			VT044969-x-VT008825	w[1118]; P{y[+t7.7] w[+mC]=VT044969-p65.AD}attP40; P{y[+t7.7] w[+mC]=VT008825-GAL4.DBD}attP2
SS56430	Adult	Kaiyu Wang	Dickson	1	N	No	No	10.1101/2024.01.09.574419	Meissner; 2024	3031536			VT044649-x-VT008676	w[1118]; P{y[+t7.7] w[+mC]=VT044649-p65.AD}attP40; P{y[+t7.7] w[+mC]=VT008676-GAL4.DBD}attP2
SS56436	Adult	Kaiyu Wang	Dickson	1	N	No	No	10.1101/2024.01.09.574419	Meissner; 2024	3031533			VT031084-x-VT049135	w[1118]; P{y[+t7.7] w[+mC]=VT031084-p65.AD}attP40; P{y[+t7.7] w[+mC]=VT049135-GAL4.DBD}attP2
SS56460	Adult	Kaiyu Wang	Dickson	1	N	No	No	10.1101/2024.01.09.574419	Meissner; 2024	3031540	VNC_AN		VT040556-x-VT033469	w[1118]; P{y[+t7.7] w[+mC]=VT040556-p65.AD}attP40; P{y[+t7.7] w[+mC]=VT033469-GAL4.DBD}attP2/TM6B, Tb[+]
SS56508	Adult	Kaiyu Wang	Dickson	1	N	No	No	10.1101/2024.01.09.574419	Meissner; 2024	3031534			VT008135-x-VT020126	w[1118]; P{y[+t7.7] w[+mC]=VT008135-p65.AD}attP40; P{y[+t7.7] w[+mC]=VT020126-GAL4.DBD}attP2
SS56532	Adult	Kaiyu Wang	Dickson	1	N	No	No	10.1101/2024.01.09.574419	Meissner; 2024	3031539	VNC_AN		VT020823-x-VT033469	w[1118]; P{y[+t7.7] w[+mC]=VT020823-p65.AD}attP40; P{y[+t7.7] w[+mC]=VT033469-GAL4.DBD}attP2/TM6B, Tb[1]
SS56718	Adult	DI	DI	1	N	No	No	10.1101/2024.01.09.574419	Meissner; 2024	3031722	DNg41		VT015434-x-VT019067	w[1118]; P{y[+t7.7] w[+mC]=VT015434-p65.AD}attP40; P{y[+t7.7] w[+mC]=VT019067-GAL4.DBD}attP2
SS56867	Adult	Kaiyu Wang	Dickson	2	N	No	No	10.1101/2024.01.09.574419	Meissner; 2024	3031543	pCd2-like		VT065320-x-VT016854	w[1118]; P{y[+t7.7] w[+mC]=VT065320-p65.AD}attP40; P{y[+t7.7] w[+mC]=VT016854-GAL4.DBD}attP2
SS56886	Adult	Kaiyu Wang	Dickson	1	N	No	No	10.1101/2024.01.09.574419	Meissner; 2024	3031546			VT000849-x-VT046289	w[1118]; P{y[+t7.7] w[+mC]=VT000849-p65.AD}attP40/CyO, P{w[+mC]=2xTb[1]-RFP}CyO; P{y[+t7.7] w[+mC]=VT046289-GAL4.DBD}attP2
SS56902	Adult	Kaiyu Wang	Dickson	1	N	No	No	10.1101/2024.01.09.574419	Meissner; 2024	3031572			VT044519-x-VT010117	w[1118]; P{y[+t7.7] w[+mC]=VT044519-p65.AD}attP40; P{y[+t7.7] w[+mC]=VT010117-GAL4.DBD}attP2
SS56907	Adult	Kaiyu Wang	Dickson	1	N	No	No	10.1101/2024.01.09.574419	Meissner; 2024	3031550			VT044519-x-VT040969	w[1118]; P{y[+t7.7] w[+mC]=VT044519-p65.AD}attP40; P{y[+t7.7] w[+mC]=VT040969-GAL4.DBD}attP2
SS56910	Adult	Kaiyu Wang	Dickson	1	N	No	No	10.1101/2024.01.09.574419	Meissner; 2024	3031567			VT000771-x-GMR_21H11	w[1118]; P{y[+t7.7] w[+mC]=VT000771-p65.AD}attP40; P{y[+t7.7] w[+mC]=R21H11-GAL4.DBD}attP2
SS56922	Adult	Kaiyu Wang	Dickson	1	N	No	No	10.1101/2024.01.09.574419	Meissner; 2024	3031558			VT026663-x-GMR_40A01	w[1118]; P{y[+t7.7] w[+mC]=VT026663-p65.AD}attP40; P{y[+t7.7] w[+mC]=R40A01-GAL4.DBD}attP2
SS56947	Adult	Kaiyu Wang	Dickson	1	N	No	No	10.1101/2024.01.09.574419	Meissner; 2024	3031570	vAB3		VT017645-x-GMR_56B12	w[1118]; P{y[+t7.7] w[+mC]=VT017645-p65.AD}attP40; P{y[+t7.7] w[+mC]=R56B12-GAL4.DBD}attP2
SS56994	Adult	Ryo Minegishi	Dickson	2	N	No	No	10.1101/2024.01.09.574419	Meissner; 2024	3030412	LUL94, LUL95, LUL110		GMR_15A05-x-VT057224	w[1118]; P{y[+t7.7] w[+mC]=R15A05-p65.AD}attP40/CyO, P{w[+mC]=2xTb[1]-RFP}CyO; P{y[+t7.7] w[+mC]=VT057224-GAL4.DBD}attP2
SS56995	Adult	DI	DI	1	N	No	No	10.1101/2024.01.09.574419	Meissner; 2024	3031749	DNg03x~13		VT039465-x-GMR_42B02	w[1118]; P{y[+t7.7] w[+mC]=VT039465-p65.AD}attP40; P{y[+t7.7] w[+mC]=R42B02-GAL4.DBD}attP2
SS57049	Adult	DI	DI	1	N	No	No	10.1101/2024.01.09.574419	Meissner; 2024	3031731	DNp42		GMR_32A04-x-VT008881	w[1118]; P{y[+t7.7] w[+mC]=R32A04-p65.AD}attP40; P{y[+t7.7] w[+mC]=VT008881-GAL4.DBD}attP2
SS57179	Adult	Aljoscha Nern	Rubin	2	N	No	No	10.1101/2024.01.09.574419	Meissner; 2024	3032587	PLP018		VT058548-x-VT015249	w[1118]; P{y[+t7.7] w[+mC]=VT058548-p65.AD}attP40; P{y[+t7.7] w[+mC]=VT015249-GAL4.DBD}attP2
SS57798	Adult	DI	DI	1	N	No	No	10.1101/2024.01.09.574419	Meissner; 2024	3031989	DNg04		GMR_19G08-x-VT037825	w[1118]; P{y[+t7.7] w[+mC]=VT037825-GAL4.DBD}attP2 P{y[+t7.7] w[+mC]=R19G08-p65.AD}su(Hw)attP1
SS57871	Adult	Kaiyu Wang	Dickson	1	N	No	Yes	10.1101/2024.01.09.574419	Meissner; 2024	3030958			VT043699-x-VT008473	w[1118]; P{y[+t7.7] w[+mC]=VT043699-p65.AD}attP40/CyO, P{w[+mC]=2xTb[1]-RFP}CyO; P{y[+t7.7] w[+mC]=VT008473-GAL4.DBD}attP2
SS57873	Adult	Kaiyu Wang	Dickson	1	N	No	Yes	10.1101/2024.01.09.574419	Meissner; 2024	3030960			VT008485-x-VT008473	w[1118]; P{y[+t7.7] w[+mC]=VT008485-p65.AD}attP40; P{y[+t7.7] w[+mC]=VT008473-GAL4.DBD}attP2
SS57880	Adult	Kaiyu Wang	Dickson	1	N	No	Yes	10.1101/2024.01.09.574419	Meissner; 2024	3030967			GMR_24C08-x-VT008473	w[1118]; P{y[+t7.7] w[+mC]=R24C08-p65.AD}attP40; P{y[+t7.7] w[+mC]=VT008473-GAL4.DBD}attP2
SS57881	Adult	Kaiyu Wang	Dickson	1	Y	No	No	10.1101/2024.01.09.574419	Meissner; 2024	3030968			GMR_22B02-x-VT043699	w[1118]; P{y[+t7.7] w[+mC]=R22B02-p65.AD}attP40; P{y[+t7.7] w[+mC]=VT043699-GAL4.DBD}attP2
SS57882	Adult	Kaiyu Wang	Dickson	1	N	No	Yes	10.1101/2024.01.09.574419	Meissner; 2024	3030969			GMR_24C08-x-VT043699	w[1118]; P{y[+t7.7] w[+mC]=R24C08-p65.AD}attP40; P{y[+t7.7] w[+mC]=VT043699-GAL4.DBD}attP2
SS57883	Adult	Kaiyu Wang	Dickson	1	Y	No	Yes	10.1101/2024.01.09.574419	Meissner; 2024	3030970			GMR_65G08-x-VT043699	w[1118]; P{y[+t7.7] w[+mC]=R65G08-p65.AD}attP40; P{y[+t7.7] w[+mC]=VT043699-GAL4.DBD}attP2
SS57886	Adult	Kaiyu Wang	Dickson	2	N	No	No	10.1101/2024.01.09.574419	Meissner; 2024	3031007	vlpr_PN		GMR_23G05-x-GMR_41A08	w[1118]; P{y[+t7.7] w[+mC]=R23G05-p65.AD}attP40; P{y[+t7.7] w[+mC]=R41A08-GAL4.DBD}attP2
SS57933	Adult	Ryo Minegishi	Dickson	2	N	No	No	10.1101/2024.01.09.574419	Meissner; 2024	3032054	SN_mixed		VT063627-x-VT059791	w[1118]; P{y[+t7.7] w[+mC]=VT063627-p65.AD}attP40; P{y[+t7.7] w[+mC]=VT059791-GAL4.DBD}attP2
SS57948	Adult	Ryo Minegishi	Dickson	2	N	No	No	10.1101/2024.01.09.574419	Meissner; 2024	3032064	LBI65, LBI66		VT058873-x-VT045591	w[1118]; P{y[+t7.7] w[+mC]=VT058873-p65.AD}attP40; P{y[+t7.7] w[+mC]=VT045591-GAL4.DBD}attP2/TM6B, Tb[1]
SS57949	Adult	Ryo Minegishi	Dickson	1	N	No	No	10.1101/2024.01.09.574419	Meissner; 2024	3034252	LBA56, LBI23		VT043377-x-VT056808	w[1118]; P{y[+t7.7] w[+mC]=VT043377-p65.AD}attP40; P{y[+t7.7] w[+mC]=VT056808-GAL4.DBD}attP2
SS57956	Adult	Ryo Minegishi	Dickson	2	N	No	No	10.1101/2024.01.09.574419	Meissner; 2024	3034228	LUL158		VT002670-x-VT026755	w[1118]; P{y[+t7.7] w[+mC]=VT002670-p65.AD}attP40; P{y[+t7.7] w[+mC]=VT026755-GAL4.DBD}attP2
SS57966	Adult	Ryo Minegishi	Dickson	2	N	No	No	10.1101/2024.01.09.574419	Meissner; 2024	3032061	LUL158		VT026755-x-VT002670	w[1118]; P{y[+t7.7] w[+mC]=VT026755-p65.AD}attP40; P{y[+t7.7] w[+mC]=VT002670-GAL4.DBD}attP2
SS57975	Adult	Ryo Minegishi	Dickson	1	N	No	No	10.1101/2024.01.09.574419	Meissner; 2024	3032048			VT040354-x-VT000254	w[1118]; P{y[+t7.7] w[+mC]=VT040354-p65.AD}attP40; P{y[+t7.7] w[+mC]=VT000254-GAL4.DBD}attP2
SS58001	Adult	Ryo Minegishi	Dickson	2	N	No	No	10.1101/2024.01.09.574419	Meissner; 2024	3032075	LUL158		VT026755-x-GMR_48A03	w[1118]; P{y[+t7.7] w[+mC]=VT026755-p65.AD}attP40; P{y[+t7.7] w[+mC]=R48A03-GAL4.DBD}attP2
SS58011	Adult	Ryo Minegishi	Dickson	1	N	No	No	10.1101/2024.01.09.574419	Meissner; 2024	3034253	AN_mod		VT043377-x-GMR_78A04	w[1118]; P{y[+t7.7] w[+mC]=VT043377-p65.AD}attP40; P{y[+t7.7] w[+mC]=R78A04-GAL4.DBD}attP2
SS58304	Adult	DI	DI	1	N	No	No	10.1101/2024.01.09.574419	Meissner; 2024	3032112	DNg91		VT037825-x-VT000926	w[1118]; P{y[+t7.7] w[+mC]=VT037825-p65.AD}attP40; P{y[+t7.7] w[+mC]=VT000926-GAL4.DBD}attP2
SS58839	Adult	Ryo Minegishi	Dickson	1	N	Yes	No	10.1101/2024.01.09.574419	Meissner; 2024	3031836	LUL14, LUL15, LUL20		VT032228-x-GMR_26B10	w[1118]; P{y[+t7.7] w[+mC]=VT032228-p65.AD}attP40; P{y[+t7.7] w[+mC]=R26B10-GAL4.DBD}attP2
SS58881	Adult	DI	DI	2	N	No	No	10.1101/2024.01.09.574419	Meissner; 2024	3032956	PSI		VT044326-x-VT012768	w[1118]; P{y[+t7.7] w[+mC]=VT044326-p65.AD}attP40; P{y[+t7.7] w[+mC]=VT012768-GAL4.DBD}attP2
SS59149	Adult	Ryo Minegishi	Dickson	2	N	No	No	10.1101/2024.01.09.574419	Meissner; 2024	3034244	LBA8		VT034258-x-VT017416	w[1118]; P{y[+t7.7] w[+mC]=VT034258-p65.AD}attP40; P{y[+t7.7] w[+mC]=VT017416-GAL4.DBD}attP2
SS59163	Adult	Ryo Minegishi	Dickson	1	N	No	No	10.1101/2024.01.09.574419	Meissner; 2024	3034208	LBA73		VT063303-x-VT057467	w[1118]; P{y[+t7.7] w[+mC]=VT063303-p65.AD}attP40; P{y[+t7.7] w[+mC]=VT057467-GAL4.DBD}attP2
SS59173	Adult	Ryo Minegishi	Dickson	2	N	No	No	10.1101/2024.01.09.574419	Meissner; 2024	3035812	LUL50, LUL55		VT019902-x-VT047171	w[1118]; P{y[+t7.7] w[+mC]=VT019902-p65.AD}attP40; P{y[+t7.7] w[+mC]=VT047171-GAL4.DBD}attP2
SS59205	Adult	Ryo Minegishi	Dickson	2	N	No	No	10.1101/2024.01.09.574419	Meissner; 2024	3035808	LUL158		GMR_48A03-x-VT049488	w[1118]; P{y[+t7.7] w[+mC]=R48A03-p65.AD}attP40; P{y[+t7.7] w[+mC]=VT049488-GAL4.DBD}attP2
SS59226	Adult	Ryo Minegishi	Dickson	1	N	Yes	No	10.1101/2024.01.09.574419	Meissner; 2024	3034225	LBI63, LBI65, LBI66		VT058873-x-GMR_29G03	w[1118]; P{y[+t7.7] w[+mC]=VT058873-p65.AD}attP40; P{y[+t7.7] w[+mC]=R29G03-GAL4.DBD}attP2
SS59408	Adult	Gerry Rubin	Rubin	2	N	No	No	10.1101/2024.01.09.574419	Meissner; 2024	3032410	hDeltaK		VT062617-x-VT004726	w[1118]; P{y[+t7.7] w[+mC]=VT062617-p65.AD}attP40; P{y[+t7.7] w[+mC]=VT004726-GAL4.DBD}attP2
SS59468	Adult	Gerry Rubin	Rubin	1	N	No	No	10.1101/2024.01.09.574419	Meissner; 2024	3032413	FB6D, FB6A, FB6C_a		GMR_23E10-x-VT032466	w[1118]; P{y[+t7.7] w[+mC]=R23E10-p65.AD}JK22C; P{y[+t7.7] w[+mC]=VT032466-GAL4.DBD}attP2/TM6B, Tb[1]
SS59519	Adult	Jens Goldammer	Rubin	1	N	Yes	No	10.1101/2024.01.09.574419	Meissner; 2024	3039006	PS060 and/or LAL111		GMR_75B09-x-GMR_26D03	w[1118]; P{y[+t7.7] w[+mC]=R75B09-p65.AD}JK22C; P{y[+t7.7] w[+mC]=R26D03-GAL4.DBD}attP2
SS59657	Adult	Tanya Wolff	Rubin	2	N	No	No	10.1101/2024.01.09.574419	Meissner; 2024	3043884			VT013592-x-VT034258	w[1118]; P{y[+t7.7] w[+mC]=VT013592-p65.AD}attP40; P{y[+t7.7] w[+mC]=VT034258-GAL4.DBD}attP2
SS59739	Adult	Gerry Rubin	Rubin	1	N	No	Yes	10.1101/2024.01.09.574419	Meissner; 2024	3032669	hDeltaA		GMR_11D02-x-VT034258	w[1118]; P{y[+t7.7] w[+mC]=R11D02-p65.AD}attP40; P{y[+t7.7] w[+mC]=VT034258-GAL4.DBD}attP2
SS59820	Adult	Kaiyu Wang	Dickson	1	N	No	No	10.1101/2024.01.09.574419	Meissner; 2024	3032197			VT012328-x-BJD_dsx	w[1118]; P{y[+t7.7] w[+mC]=VT012328-p65.AD}attP40/CyO; TI{GAL4(DBD)::Zip-}dsx[GAL4(DBD)::Zip-]/TM6B, Tb[1]
SS59821	Adult	Kaiyu Wang	Dickson	1	Y	No	Yes	10.1101/2024.01.09.574419	Meissner; 2024	3032198			VT002033-x-BJD_dsx	w[1118]; P{y[+t7.7] w[+mC]=VT002033-p65.AD}attP40/CyO; TI{GAL4(DBD)::Zip-}dsx[GAL4(DBD)::Zip-]/TM6B, Tb[+]
SS59823	Adult	Kaiyu Wang	Dickson	1	Y	No	No	10.1101/2024.01.09.574419	Meissner; 2024	3032200			VT019845-x-BJD_dsx	w[1118]; P{y[+t7.7] w[+mC]=VT019845-p65.AD}attP40/CyO; TI{GAL4(DBD)::Zip-}dsx[GAL4(DBD)::Zip-]/TM6B, Tb[+]
SS59824	Adult	Kaiyu Wang	Dickson	1	N	Yes	No	10.1101/2024.01.09.574419	Meissner; 2024	3032201			VT045153-x-BJD_dsx	w[1118]; P{y[+t7.7] w[+mC]=VT045153-p65.AD}attP40/CyO; TI{GAL4(DBD)::Zip-}dsx[GAL4(DBD)::Zip-]/TM6B, Tb[1]
SS59825	Adult	Kaiyu Wang	Dickson	1	Y	No	Yes	10.1101/2024.01.09.574419	Meissner; 2024	3032202			VT064581-x-BJD_dsx	w[1118]; P{y[+t7.7] w[+mC]=VT064581-p65.AD}attP40/CyO, P{w[+mC]=2xTb[1]-RFP}CyO; TI{GAL4(DBD)::Zip-}dsx[GAL4(DBD)::Zip-]/TM6B, Tb[1]
SS59827	Adult	Kaiyu Wang	Dickson	1	N	Yes	No	10.1101/2024.01.09.574419	Meissner; 2024	3032204			VT049483-x-BJD_dsx	w[1118]; P{y[+t7.7] w[+mC]=VT049483-p65.AD}attP40; TI{GAL4(DBD)::Zip-}dsx[GAL4(DBD)::Zip-]/TM6B, Tb[1]
SS59829	Adult	Kaiyu Wang	Dickson	2	Y	No	No	10.1101/2024.01.09.574419	Meissner; 2024	3032206			VT043653-x-BJD_dsx	w[1118]; P{y[+t7.7] w[+mC]=VT043653-p65.AD}attP40; TI{GAL4(DBD)::Zip-}dsx[GAL4(DBD)::Zip-]/TM6B, Tb[1]
SS59833	Adult	Kaiyu Wang	Dickson	1	N	Yes	No	10.1101/2024.01.09.574419	Meissner; 2024	3032210			VT040564-x-BJD_dsx	w[1118]; P{y[+t7.7] w[+mC]=VT040564-p65.AD}attP40/CyO, P{w[+mC]=2xTb[1]-RFP}CyO; TI{GAL4(DBD)::Zip-}dsx[GAL4(DBD)::Zip-]/TM6B, Tb[1]
SS59835	Adult	Kaiyu Wang	Dickson	2	N	No	No	10.1101/2024.01.09.574419	Meissner; 2024	3032212			VT034628-x-BJD_dsx	w[1118]; P{y[+t7.7] w[+mC]=VT034628-p65.AD}attP40/CyO; TI{GAL4(DBD)::Zip-}dsx[GAL4(DBD)::Zip-]/TM6B, Tb[1]
SS59836	Adult	Kaiyu Wang	Dickson	1	Y	No	No	10.1101/2024.01.09.574419	Meissner; 2024	3032213			VT027312-x-BJD_dsx	w[1118]; P{y[+t7.7] w[+mC]=VT027312-p65.AD}attP40; TI{GAL4(DBD)::Zip-}dsx[GAL4(DBD)::Zip-]/TM6B, Tb[1]
SS59841	Adult	Kaiyu Wang	Dickson	1	N	No	No	10.1101/2024.01.09.574419	Meissner; 2024	3032218			VT034258-x-BJD_dsx	w[1118]; P{y[+t7.7] w[+mC]=VT034258-p65.AD}attP40; TI{GAL4(DBD)::Zip-}dsx[GAL4(DBD)::Zip-]/TM6B, Tb[1]
SS59842	Adult	Kaiyu Wang	Dickson	1	Y	No	No	10.1101/2024.01.09.574419	Meissner; 2024	3032219			VT020605-x-BJD_dsx	w[1118]; P{y[+t7.7] w[+mC]=VT020605-p65.AD}attP40/CyO; TI{GAL4(DBD)::Zip-}dsx[GAL4(DBD)::Zip-]/TM6B, Tb[1]
SS59843	Adult	Kaiyu Wang	Dickson	1	Y	No	No	10.1101/2024.01.09.574419	Meissner; 2024	3032220			VT023795-x-BJD_dsx	w[1118]; P{y[+t7.7] w[+mC]=VT023795-p65.AD}attP40/CyO; TI{GAL4(DBD)::Zip-}dsx[GAL4(DBD)::Zip-]/TM6B, Tb[1]
SS59844	Adult	Kaiyu Wang	Dickson	1	Y	No	No	10.1101/2024.01.09.574419	Meissner; 2024	3032221			VT045670-x-BJD_dsx	w[1118]; P{y[+t7.7] w[+mC]=VT045670-p65.AD}attP40/CyO, P{w[+mC]=2xTb[1]-RFP}CyO; TI{GAL4(DBD)::Zip-}dsx[GAL4(DBD)::Zip-]/TM6B, Tb[1]
SS59845	Adult	Kaiyu Wang	Dickson	1	Y	No	No	10.1101/2024.01.09.574419	Meissner; 2024	3032222			VT026011-x-BJD_dsx	w[1118]; P{y[+t7.7] w[+mC]=VT026011-p65.AD}attP40; TI{GAL4(DBD)::Zip-}dsx[GAL4(DBD)::Zip-]/TM6B, Tb[1]
SS59847	Adult	Kaiyu Wang	Dickson	1	Y	No	No	10.1101/2024.01.09.574419	Meissner; 2024	3032224			VT031562-x-BJD_dsx	w[1118]; P{y[+t7.7] w[+mC]=VT031562-p65.AD}attP40; TI{GAL4(DBD)::Zip-}dsx[GAL4(DBD)::Zip-]/TM6B, Tb[1]
SS59850	Adult	Kaiyu Wang	Dickson	1	N	No	No	10.1101/2024.01.09.574419	Meissner; 2024	3032227			VT041041-x-BJD_dsx	w[1118]; P{y[+t7.7] w[+mC]=VT041041-p65.AD}attP40; TI{GAL4(DBD)::Zip-}dsx[GAL4(DBD)::Zip-]/TM6B, Tb[1]
SS59852	Adult	Kaiyu Wang	Dickson	1	Y	No	No	10.1101/2024.01.09.574419	Meissner; 2024	3032229			VT040574-x-BJD_dsx	w[1118]; P{y[+t7.7] w[+mC]=VT040574-p65.AD}attP40; TI{GAL4(DBD)::Zip-}dsx[GAL4(DBD)::Zip-]/TM6B, Tb[1]
SS59862	Adult	Kaiyu Wang	Dickson	1	N	No	No	10.1101/2024.01.09.574419	Meissner; 2024	3032239			VT019906-x-BJD_dsx	w[1118]; P{y[+t7.7] w[+mC]=VT019906-p65.AD}attP40/CyO; TI{GAL4(DBD)::Zip-}dsx[GAL4(DBD)::Zip-]/TM6B, Tb[1]
SS59869	Adult	Kaiyu Wang	Dickson	1	N	Yes	No	10.1101/2024.01.09.574419	Meissner; 2024	3032246			VT019723-x-BJD_dsx	w[1118]; P{y[+t7.7] w[+mC]=VT019723-p65.AD}attP40; TI{GAL4(DBD)::Zip-}dsx[GAL4(DBD)::Zip-]/TM6B, Tb[1]
SS59871	Adult	Kaiyu Wang	Dickson	2	Y	No	No	10.1101/2024.01.09.574419	Meissner; 2024	3032248			VT007358-x-BJD_dsx	w[1118]; P{y[+t7.7] w[+mC]=VT007358-p65.AD}attP40; TI{GAL4(DBD)::Zip-}dsx[GAL4(DBD)::Zip-]/TM6B, Tb[1]
SS59872	Adult	Kaiyu Wang	Dickson	1	N	No	No	10.1101/2024.01.09.574419	Meissner; 2024	3032249			VT045661-x-BJD_dsx	w[1118]; P{y[+t7.7] w[+mC]=VT045661-p65.AD}attP40; TI{GAL4(DBD)::Zip-}dsx[GAL4(DBD)::Zip-]/TM6B, Tb[1]
SS59874	Adult	Kaiyu Wang	Dickson	2	Y	No	No	10.1101/2024.01.09.574419	Meissner; 2024	3032251	WN_LN_mixed		VT065320-x-BJD_dsx	w; VT065320-p65ADZp in attP40/CyOTb; dsx-ZpGdbd/TM6B
SS59876	Adult	Kaiyu Wang	Dickson	1	Y	No	No	10.1101/2024.01.09.574419	Meissner; 2024	3032253			VT008288-x-BJD_dsx	w[1118]; P{y[+t7.7] w[+mC]=VT008288-p65.AD}attP40; TI{GAL4(DBD)::Zip-}dsx[GAL4(DBD)::Zip-]/TM6B, Tb[1]
SS59879	Adult	Kaiyu Wang	Dickson	1	Y	No	No	10.1101/2024.01.09.574419	Meissner; 2024	3032256			VT016854-x-BJD_dsx	w[1118]; P{y[+t7.7] w[+mC]=VT016854-p65.AD}attP40/CyO; TI{GAL4(DBD)::Zip-}dsx[GAL4(DBD)::Zip-]/TM6B, Tb[1]
SS59880	Adult	Kaiyu Wang	Dickson	1	N	No	Yes	10.1101/2024.01.09.574419	Meissner; 2024	3032257			VT025981-x-BJD_dsx	w[1118]; P{y[+t7.7] w[+mC]=VT025981-p65.AD}attP40/CyO; TI{GAL4(DBD)::Zip-}dsx[GAL4(DBD)::Zip-]/TM6B, Tb[1]
SS59881	Adult	Kaiyu Wang	Dickson	2	N	No	No	10.1101/2024.01.09.574419	Meissner; 2024	3032258			VT044959-x-BJD_dsx	w[1118]; P{y[+t7.7] w[+mC]=VT044959-p65.AD}attP40; TI{GAL4(DBD)::Zip-}dsx[GAL4(DBD)::Zip-]/TM6B, Tb[1]
SS59882	Adult	Kaiyu Wang	Dickson	1	Y	No	No	10.1101/2024.01.09.574419	Meissner; 2024	3032259			VT025966-x-BJD_dsx	w[1118]; P{y[+t7.7] w[+mC]=VT025966-p65.AD}attP40; TI{GAL4(DBD)::Zip-}dsx[GAL4(DBD)::Zip-]/TM6B, Tb[+]
SS59887	Adult	Kaiyu Wang	Dickson	1	Y	No	No	10.1101/2024.01.09.574419	Meissner; 2024	3032264			GMR_71G01-x-BJD_dsx	w[1118]; P{y[+t7.7] w[+mC]=R71G01-p65.AD}attP40; TI{GAL4(DBD)::Zip-}dsx[GAL4(DBD)::Zip-]/TM6B, Tb[1]
SS59903	Adult	Kaiyu Wang	Dickson	2	Y	No	No	10.1101/2024.01.09.574419	Meissner; 2024	3032280	WN_LN_mixed		VT043168-x-BJD_dsx	w[1118]; P{y[+t7.7] w[+mC]=VT043168-p65.AD}attP2 TI{GAL4(DBD)::Zip-}dsx[GAL4(DBD)::Zip-]/TM6B, Tb[1]
SS59970	Adult	DI	DI	1	N	No	No	10.1101/2024.01.09.574419	Meissner; 2024	3032842	WN-IN (symmetric)		VT013612-x-VT027316	w[1118]; P{y[+t7.7] w[+mC]=VT013612-p65.AD}attP40; P{y[+t7.7] w[+mC]=VT027316-GAL4.DBD}attP2
SS59972	Adult	DI	DI	2	N	No	No	10.1101/2024.01.09.574419	Meissner; 2024	3032854	WN-IN (symmetric)		VT013612-x-GMR_25C01	w[1118]; P{y[+t7.7] w[+mC]=VT013612-p65.AD}attP40; P{y[+t7.7] w[+mC]=R25C01-GAL4.DBD}attP2
SS59978	Adult	DI	DI	1	N	Yes	No	10.1101/2024.01.09.574419	Meissner; 2024	3032831	WN-IN		VT031084-x-VT031567	w[1118]; P{y[+t7.7] w[+mC]=VT031084-p65.AD}attP40; P{y[+t7.7] w[+mC]=VT031567-GAL4.DBD}attP2
SS60041	Adult	DI	DI	1	N	No	No	10.1101/2024.01.09.574419	Meissner; 2024	3032838	WN-IN (symmetric)		GMR_TDC2-x-VT013612	w[1118]; P{y[+t7.7] w[+mC]=Tdc2-p65.AD}attP40; P{y[+t7.7] w[+mC]=VT013612-GAL4.DBD}attP2/TM6B, Tb[1]
SS60195	Adult	Kaiyu Wang	Dickson	1	N	No	No	10.1101/2024.01.09.574419	Meissner; 2024	3032508	vlpr_LN		VT039478-x-VT003238	w[1118]; P{y[+t7.7] w[+mC]=VT039478-p65.AD}attP40/CyO; P{y[+t7.7] w[+mC]=VT003238-GAL4.DBD}attP2/TM6B, Tb[1]
SS60203	Adult	Kaiyu Wang	Dickson	1	N	No	No	10.1101/2024.01.09.574419	Meissner; 2024	3032516	WN_AN		VT038448-x-VT008424	w[1118]; P{y[+t7.7] w[+mC]=VT038448-p65.AD}attP40; P{y[+t7.7] w[+mC]=VT008424-GAL4.DBD}attP2
SS60209	Adult	Kaiyu Wang	Dickson	2	N	No	No	10.1101/2024.01.09.574419	Meissner; 2024	3032522	WN_LN_mixed		VT043653-x-VT013618	w[1118]; P{y[+t7.7] w[+mC]=VT043653-p65.AD}attP40; P{y[+t7.7] w[+mC]=VT013618-GAL4.DBD}attP2/TM6B, Tb[1]
SS60214	Adult	Kaiyu Wang	Dickson	1	Y	Yes	No	10.1101/2024.01.09.574419	Meissner; 2024	3032528	WN_LN_mixed		VT019728-x-GMR_28B05	w[1118]; P{y[+t7.7] w[+mC]=VT019728-p65.AD}attP40; P{y[+t7.7] w[+mC]=R28B05-GAL4.DBD}attP2
SS60215	Adult	Kaiyu Wang	Dickson	2	N	No	No	10.1101/2024.01.09.574419	Meissner; 2024	3032529	WN_LN_mixed		VT058688-x-VT057137	w[1118]; P{y[+t7.7] w[+mC]=VT058688-p65.AD}attP40; P{y[+t7.7] w[+mC]=VT057137-GAL4.DBD}attP2/TM6B, Tb[1]
SS60216	Adult	Kaiyu Wang	Dickson	1	N	No	No	10.1101/2024.01.09.574419	Meissner; 2024	3032530	VNC_SN		VT058688-x-GMR_31H10	w[1118]; P{y[+t7.7] w[+mC]=VT058688-p65.AD}attP40/CyO; P{y[+t7.7] w[+mC]=R31H10-GAL4.DBD}attP2
SS60227	Adult	Ryo Minegishi	Dickson	2	N	No	No	10.1101/2024.01.09.574419	Meissner; 2024	3034202			VT037863-x-VT012596	w[1118]; P{y[+t7.7] w[+mC]=VT037863-p65.AD}attP40; P{y[+t7.7] w[+mC]=VT012596-GAL4.DBD}attP2
SS60231	Adult	Ryo Minegishi	Dickson	2	N	No	No	10.1101/2024.01.09.574419	Meissner; 2024	3034178	LUL149, LUL171, LUL172, LUL173		VT006555-x-VT047169	w[1118]; P{y[+t7.7] w[+mC]=VT006555-p65.AD}attP40; P{y[+t7.7] w[+mC]=VT047169-GAL4.DBD}attP2
SS60237	Adult	Ryo Minegishi	Dickson	2	N	No	No	10.1101/2024.01.09.574419	Meissner; 2024	3034164	LBL59		VT019717-x-VT039523	w[1118]; P{y[+t7.7] w[+mC]=VT019717-p65.AD}attP40; P{y[+t7.7] w[+mC]=VT039523-GAL4.DBD}attP2
SS60240	Adult	Ryo Minegishi	Dickson	2	N	No	No	10.1101/2024.01.09.574419	Meissner; 2024	3034248	LUL129, LUL171, LUL173		VT007752-x-VT019023	w[1118]; P{y[+t7.7] w[+mC]=VT007752-p65.AD}attP40; P{y[+t7.7] w[+mC]=VT019023-GAL4.DBD}attP2
SS60258	Adult	Ryo Minegishi	Dickson	3	N	No	No	10.1101/2024.01.09.574419	Meissner; 2024	3034203			VT039518-x-VT038205	w[1118]; P{y[+t7.7] w[+mC]=VT039518-p65.AD}attP40; P{y[+t7.7] w[+mC]=VT038205-GAL4.DBD}attP2
SS60305	Adult	Tanya Wolff	Rubin	1	N	No	No	10.1101/2024.01.09.574419	Meissner; 2024	3034432	FB4O, FB4Q		VT044958-x-VT044959	w[1118]; P{y[+t7.7] w[+mC]=VT044959-GAL4.DBD}attP2 PBac{y[+mDint2] w[+mC]=VT044958-p65.AD}VK00005
SS60363	Adult	Tanya Wolff	Rubin	1	N	No	No	10.1101/2024.01.09.574419	Meissner; 2024	3034549	hDeltaL, hDelta		GMR_30G06-x-GMR_54G07	w[1118]; P{y[+t7.7] w[+mC]=R30G06-p65.AD}attP40; P{y[+t7.7] w[+mC]=R54G07-GAL4.DBD}attP2/TM6B, Tb[1]
SS60483	Adult	Tanya Wolff	Rubin	1	N	No	No	10.1101/2024.01.09.574419	Meissner; 2024	3034447	hDeltaH, FR2?		GMR_91A01-x-VT063731	w[1118]; P{y[+t7.7] w[+mC]=VT063731-GAL4.DBD}attP2 PBac{y[+mDint2] w[+mC]=R91A01-p65.AD}VK00027
SS60590	Adult	Ryo Minegishi	Dickson	2	N	No	No	10.1101/2024.01.09.574419	Meissner; 2024	3034221	LBL14		VT027104-x-VT019730	w[1118]; P{y[+t7.7] w[+mC]=VT027104-p65.AD}attP40; P{y[+t7.7] w[+mC]=VT019730-GAL4.DBD}attP2
SS60600	Adult	Ryo Minegishi	Dickson	4	N	No	No	10.1101/2024.01.09.574419	Meissner; 2024	3034161	LBI24		VT004958-x-VT034810	w[1118]; P{y[+t7.7] w[+mC]=VT004958-p65.AD}attP40; P{y[+t7.7] w[+mC]=VT034810-GAL4.DBD}attP2/TM6B, Tb[1]
SS60605	Adult	Ryo Minegishi	Dickson	2	N	No	No	10.1101/2024.01.09.574419	Meissner; 2024	3034245	LBL40		VT006480-x-VT029570	w[1118]; P{y[+t7.7] w[+mC]=VT006480-p65.AD}attP40; P{y[+t7.7] w[+mC]=VT029570-GAL4.DBD}attP2
SS60607	Adult	Ryo Minegishi	Dickson	1	N	No	No	10.1101/2024.01.09.574419	Meissner; 2024	3034209	LUL148		VT016795-x-VT048843	w[1118]; P{y[+t7.7] w[+mC]=VT016795-p65.AD}attP40; P{y[+t7.7] w[+mC]=VT048843-GAL4.DBD}attP2
SS60618	Adult	Ryo Minegishi	Dickson	2	N	No	No	10.1101/2024.01.09.574419	Meissner; 2024	3034222			VT027104-x-VT042810	w[1118]; P{y[+t7.7] w[+mC]=VT027104-p65.AD}attP40; P{y[+t7.7] w[+mC]=VT042810-GAL4.DBD}attP2
SS60624	Adult	Ryo Minegishi	Dickson	1	N	No	No	10.1101/2024.01.09.574419	Meissner; 2024	3034236	LUL148		VT026771-x-VT016795	w[1118]; P{y[+t7.7] w[+mC]=VT026771-p65.AD}attP40; P{y[+t7.7] w[+mC]=VT016795-GAL4.DBD}attP2
SS60702	Adult	Gerry Rubin	Rubin	2	N	No	No	10.1101/2024.01.09.574419	Meissner; 2024	3032860	hDeltaM		GMR_72G03-x-VT032768	w[1118]; P{y[+t7.7] w[+mC]=R72G03-p65.AD}attP40; P{y[+t7.7] w[+mC]=VT032768-GAL4.DBD}attP2
SS61022	Adult	Ryo Minegishi	Dickson	4	N	No	No	10.1101/2024.01.09.574419	Meissner; 2024	3034166	LBA75, LBA76		VT045661-x-VT013975	w[1118]; P{y[+t7.7] w[+mC]=VT045661-p65.AD}attP40; P{y[+t7.7] w[+mC]=VT013975-GAL4.DBD}attP2
SS61036	Adult	Ryo Minegishi	Dickson	1	N	No	No	10.1101/2024.01.09.574419	Meissner; 2024	3034257	LBI58, LBL52		GMR_14H09-x-VT058919	w[1118]; P{y[+t7.7] w[+mC]=R14H09-p65.AD}attP40; P{y[+t7.7] w[+mC]=VT058919-GAL4.DBD}attP2
SS61045	Adult	Ryo Minegishi	Dickson	2	N	No	No	10.1101/2024.01.09.574419	Meissner; 2024	3034186			VT056360-x-VT004308	w[1118]; P{y[+t7.7] w[+mC]=VT056360-p65.AD}attP40; P{y[+t7.7] w[+mC]=VT004308-GAL4.DBD}attP2
SS61051	Adult	Ryo Minegishi	Dickson	1	N	No	No	10.1101/2024.01.09.574419	Meissner; 2024	3034188	LBA76		VT013975-x-VT014340	w[1118]; P{y[+t7.7] w[+mC]=VT013975-p65.AD}attP40; P{y[+t7.7] w[+mC]=VT014340-GAL4.DBD}attP2
SS61325	Adult	Kaiyu Wang	Dickson	1	N	Yes	No	10.1101/2024.01.09.574419	Meissner; 2024	3034143	VNC_LN		VT025968-x-VT061369	w[1118]; P{y[+t7.7] w[+mC]=VT025968-p65.AD}attP40; P{y[+t7.7] w[+mC]=VT061369-GAL4.DBD}attP2
SS61345	Adult	Kaiyu Wang	Dickson	2	N	No	No	10.1101/2024.01.09.574419	Meissner; 2024	3034142	WN_MN		VT057379-x-VT050663	w[1118]; P{y[+t7.7] w[+mC]=VT057379-p65.AD}attP40; P{y[+t7.7] w[+mC]=VT050663-GAL4.DBD}attP2
SS61350	Adult	Kaiyu Wang	Dickson	1	N	Yes	No	10.1101/2024.01.09.574419	Meissner; 2024	3034155	VNC_MN		VT057379-x-GMR_20C08	w[1118]; P{y[+t7.7] w[+mC]=VT057379-p65.AD}attP40; P{y[+t7.7] w[+mC]=R20C08-GAL4.DBD}attP2
SS61739	Adult	Kaiyu Wang	Dickson	2	N	No	No	10.1101/2024.01.09.574419	Meissner; 2024	3034137	WN_LN_mixed		VT057137-x-VT008671	w[1118]; P{y[+t7.7] w[+mC]=VT057137-p65.AD}attP40; P{y[+t7.7] w[+mC]=VT008671-GAL4.DBD}attP2
SS61786	Adult	Ryo Minegishi	Dickson	4	N	No	No	10.1101/2024.01.09.574419	Meissner; 2024	3034160	LUA12		VT002857-x-VT022104	w[1118]; P{y[+t7.7] w[+mC]=VT002857-p65.AD}attP40/CyO, P{w[+mC]=2xTb[1]-RFP}CyO; P{y[+t7.7] w[+mC]=VT022104-GAL4.DBD}attP2
SS61790	Adult	Ryo Minegishi	Dickson	3	N	No	No	10.1101/2024.01.09.574419	Meissner; 2024	3034168	LUL174		VT048852-x-VT025952	w[1118]; P{y[+t7.7] w[+mC]=VT048852-p65.AD}attP40; P{y[+t7.7] w[+mC]=VT025952-GAL4.DBD}attP2
SS61806	Adult	Kaiyu Wang	Dickson	1	Y	Yes	No	10.1101/2024.01.09.574419	Meissner; 2024	3034150	WN_LN_mixed		VT057137-x-VT037491	w[1118]; P{y[+t7.7] w[+mC]=VT057137-p65.AD}attP40; P{y[+t7.7] w[+mC]=VT037491-GAL4.DBD}attP2
SS61810	Adult	Kaiyu Wang	Dickson	1	N	Yes	No	10.1101/2024.01.09.574419	Meissner; 2024	3034152	T1_LN		VT058688-x-VT037491	w[1118]; P{y[+t7.7] w[+mC]=VT058688-p65.AD}attP40; P{y[+t7.7] w[+mC]=VT037491-GAL4.DBD}attP2
SS61813	Adult	Ryo Minegishi	Dickson	1	N	No	No	10.1101/2024.01.09.574419	Meissner; 2024	3034230	LBA6		VT008646-x-VT040417	w[1118]; P{y[+t7.7] w[+mC]=VT008646-p65.AD}attP40/CyO, P{w[+mC]=2xTb[1]-RFP}CyO; P{y[+t7.7] w[+mC]=VT040417-GAL4.DBD}attP2
SS61820	Adult	Kaiyu Wang	Dickson	2	N	No	No	10.1101/2024.01.09.574419	Meissner; 2024	3034138	WN_LN_mixed		VT057137-x-VT044492	w[1118]; P{y[+t7.7] w[+mC]=VT057137-p65.AD}attP40; P{y[+t7.7] w[+mC]=VT044492-GAL4.DBD}attP2/TM6B, Tb[1]
SS61821	Adult	Kaiyu Wang	Dickson	2	N	No	No	10.1101/2024.01.09.574419	Meissner; 2024	3034139	WN_LN_mixed		VT019728-x-VT044492	w[1118]; P{y[+t7.7] w[+mC]=VT019728-p65.AD}attP40; P{y[+t7.7] w[+mC]=VT044492-GAL4.DBD}attP2/TM6B, Tb[1]
SS61829	Adult	Ryo Minegishi	Dickson	1	N	No	No	10.1101/2024.01.09.574419	Meissner; 2024	3034204			VT040417-x-VT044961	w[1118]; P{y[+t7.7] w[+mC]=VT040417-p65.AD}attP40/CyO, P{w[+mC]=2xTb[1]-RFP}CyO; P{y[+t7.7] w[+mC]=VT044961-GAL4.DBD}attP2
SS61836	Adult	Kaiyu Wang	Dickson	1	0	No	No	10.1101/2024.01.09.574419	Meissner; 2024	3034141	VNC_LN		VT044843-x-VT050248	w[1118]; P{y[+t7.7] w[+mC]=VT044843-p65.AD}attP40/CyO, P{w[+mC]=2xTb[1]-RFP}CyO; P{y[+t7.7] w[+mC]=VT050248-GAL4.DBD}attP2
SS61953	Adult	Tanya Wolff	Rubin	1	N	No	Yes	10.1101/2024.01.09.574419	Meissner; 2024	3034723	FB5K		GMR_68B06-x-VT060202	w[1118]; P{y[+t7.7] w[+mC]=VT060202-GAL4.DBD}attP2 PBac{y[+mDint2] w[+mC]=R68B06-p65.AD}VK00027
SS62120	Adult	Ryo Minegishi	Dickson	2	N	No	No	10.1101/2024.01.09.574419	Meissner; 2024	3035794	MN		VT045148-x-VT034804	w[1118]; P{y[+t7.7] w[+mC]=VT045148-p65.AD}attP40/CyO, P{w[+mC]=2xTb[1]-RFP}CyO; P{y[+t7.7] w[+mC]=VT034804-GAL4.DBD}attP2
SS62137	Adult	Ryo Minegishi	Dickson	1	N	No	No	10.1101/2024.01.09.574419	Meissner; 2024	3034185	MN		VT045148-x-VT009849	w[1118]; P{y[+t7.7] w[+mC]=VT045148-p65.AD}attP40/CyO, P{w[+mC]=2xTb[1]-RFP}CyO; P{y[+t7.7] w[+mC]=VT009849-GAL4.DBD}attP2
SS62404	Adult	Jens Goldammer	Rubin	2	N	No	Yes	10.1101/2024.01.09.574419	Meissner; 2024	3039019	LAL162		VT002026-x-GMR_89A03	w[1118]; P{y[+t7.7] w[+mC]=VT002026-p65.AD}attP40; P{y[+t7.7] w[+mC]=R89A03-GAL4.DBD}attP2
SS62678	Adult	Ryo Minegishi	Dickson	1	N	No	No	10.1101/2024.01.09.574419	Meissner; 2024	3035799	MN		VT063635-x-VT019071	w[1118]; P{y[+t7.7] w[+mC]=VT063635-p65.AD}attP40/CyO, P{w[+mC]=2xTb[1]-RFP}CyO; P{y[+t7.7] w[+mC]=VT019071-GAL4.DBD}attP2
SS62687	Adult	Ryo Minegishi	Dickson	2	N	No	No	10.1101/2024.01.09.574419	Meissner; 2024	3035806	MN		VT063635-x-VT043156	w[1118]; P{y[+t7.7] w[+mC]=VT063635-p65.AD}attP40/CyO, P{w[+mC]=2xTb[1]-RFP}CyO; P{y[+t7.7] w[+mC]=VT043156-GAL4.DBD}attP2
SS62706	Adult	Ryo Minegishi	Dickson	2	N	No	No	10.1101/2024.01.09.574419	Meissner; 2024	3035814	MN		VT063539-x-VT064565	w[1118]; P{y[+t7.7] w[+mC]=VT063539-p65.AD}attP40/CyO, P{w[+mC]=2xTb[1]-RFP}CyO; P{y[+t7.7] w[+mC]=VT064565-GAL4.DBD}attP2
SS62736	Adult	Jens Goldammer	Rubin	1	N	No	Yes	10.1101/2024.01.09.574419	Meissner; 2024	3039176	PS076		VT000877-x-VT043075	w[1118]; P{y[+t7.7] w[+mC]=VT000877-p65.AD}attP40; P{y[+t7.7] w[+mC]=VT043075-GAL4.DBD}attP2/T(2;3)B3, CyO: TM6B, Tb[1]
SS63264	Adult	DI	DI	1	N	No	No	10.1101/2024.01.09.574419	Meissner; 2024	3036292	DNg35		VT026537-x-VT056765	w[1118]; P{y[+t7.7] w[+mC]=VT026537-p65.AD}attP40; P{y[+t7.7] w[+mC]=VT056765-GAL4.DBD}attP2
SS63305	Adult	DI	DI	1	N	No	No	10.1101/2024.01.09.574419	Meissner; 2024	3036288	DNg35		VT056765-x-VT026537	w[1118]; P{y[+t7.7] w[+mC]=VT056765-p65.AD}attP40; P{y[+t7.7] w[+mC]=VT026537-GAL4.DBD}attP2/TM6B, Tb[1]
SS63678	Adult	DI	DI	1	N	No	No	10.1101/2024.01.09.574419	Meissner; 2024	3036329	DNg21		VT057342-x-GMR_18C11	w[1118]; P{y[+t7.7] w[+mC]=VT057342-p65.AD}attP40/CyO, P{w[+mC]=2xTb[1]-RFP}CyO; P{y[+t7.7] w[+mC]=R18C11-GAL4.DBD}attP2
SS63720	Adult	DI	DI	1	N	No	No	10.1101/2024.01.09.574419	Meissner; 2024	3036299	DNg21		GMR_18C11-x-VT057342	w[1118]; P{y[+t7.7] w[+mC]=R18C11-p65.AD}attP40/CyO, P{w[+mC]=2xTb[1]-RFP}CyO; P{y[+t7.7] w[+mC]=VT057342-GAL4.DBD}attP2
SS63737	Adult	DI	DI	1	N	No	No	10.1101/2024.01.09.574419	Meissner; 2024	3036291	DNg38		GMR_32E04-x-VT000816	w[1118]; P{y[+t7.7] w[+mC]=R32E04-p65.AD}attP40; P{y[+t7.7] w[+mC]=VT000816-GAL4.DBD}attP2
SS63845	Adult	Ryo Minegishi	Dickson	2	N	No	No	10.1101/2024.01.09.574419	Meissner; 2024	3035834	LUL48		VT008452-x-GMR_76E09	w[1118]; P{y[+t7.7] w[+mC]=VT008452-p65.AD}attP40; P{y[+t7.7] w[+mC]=R76E09-GAL4.DBD}attP2
SS64047	Adult	DI	DI	2	N	No	No	10.1101/2024.01.09.574419	Meissner; 2024	3036254	DNg45 like new?		VT045096-x-VT024599	w[1118]; P{y[+t7.7] w[+mC]=VT045096-p65.AD}attP40; P{y[+t7.7] w[+mC]=VT024599-GAL4.DBD}attP2
SS64068	Adult	DI	DI	1	N	No	No	10.1101/2024.01.09.574419	Meissner; 2024	3036281	DNg33		GMR_11G09-x-VT008288	w[1118]; P{y[+t7.7] w[+mC]=R11G09-p65.AD}attP40; P{y[+t7.7] w[+mC]=VT008288-GAL4.DBD}attP2
SS64175	Adult	Ryo Minegishi	Dickson	2	N	No	No	10.1101/2024.01.09.574419	Meissner; 2024	3035803	LBA10, LUL153		VT018764-x-VT033647	w[1118]; P{y[+t7.7] w[+mC]=VT018764-p65.AD}attP40; P{y[+t7.7] w[+mC]=VT033647-GAL4.DBD}attP2
SS64184	Adult	Ryo Minegishi	Dickson	2	N	No	No	10.1101/2024.01.09.574419	Meissner; 2024	3035798	LUL130, LUL166, LUL175		VT009674-x-VT007780	w[1118]; P{y[+t7.7] w[+mC]=VT009674-p65.AD}attP40; P{y[+t7.7] w[+mC]=VT007780-GAL4.DBD}attP2
SS64218	Adult	Ryo Minegishi	Dickson	2	N	No	No	10.1101/2024.01.09.574419	Meissner; 2024	3035804	LBI62		GMR_19D12-x-VT039478	w[1118]; P{y[+t7.7] w[+mC]=R19D12-p65.AD}attP40; P{y[+t7.7] w[+mC]=VT039478-GAL4.DBD}attP2
SS64223	Adult	Ryo Minegishi	Dickson	2	N	No	No	10.1101/2024.01.09.574419	Meissner; 2024	3035809	LBA34, LUL152		GMR_24B11-x-VT057138	w[1118]; P{y[+t7.7] w[+mC]=R24B11-p65.AD}attP40; P{y[+t7.7] w[+mC]=VT057138-GAL4.DBD}attP2
SS64389	Adult	Tanya Wolff	Rubin	2	N	No	No	10.1101/2024.01.09.574419	Meissner; 2024	3035933			VT045282-x-GMR_53C01	w[1118]; P{y[+t7.7] w[+mC]=VT045282-p65.AD}attP40/CyO, P{w[+mC]=2xTb[1]-RFP}CyO; P{y[+t7.7] w[+mC]=R53C01-GAL4.DBD}attP2/TM6B, Tb[1]
SS64396	Adult	Tanya Wolff	Rubin	1	N	No	No	10.1101/2024.01.09.574419	Meissner; 2024	3035912	FC3?		GMR_38B06-x-VT014432	w[1118]; P{y[+t7.7] w[+mC]=VT014432-GAL4.DBD}attP2 PBac{y[+mDint2] w[+mC]=R38B06-p65.AD}VK00027
SS64414	Adult	Jens Goldammer	Rubin	1	N	No	Yes	10.1101/2024.01.09.574419	Meissner; 2024	3039035	VES010		GMR_66B06-x-GMR_11C01	w[1118]; P{y[+t7.7] w[+mC]=R66B06-p65.AD}JK22C/CyO; P{y[+t7.7] w[+mC]=R11C01-GAL4.DBD}attP2/TM6, Tb[1]
SS64427	Adult	Jens Goldammer	Rubin	1	N	No	No	10.1101/2024.01.09.574419	Meissner; 2024	3039041	CL131		GMR_94H04-x-VT063314	w[1118]; P{y[+t7.7] w[+mC]=R94H04-p65.AD}attP40/CyO; P{y[+t7.7] w[+mC]=VT063314-GAL4.DBD}attP2/TM6, Tb[1]
SS64503	Adult	Tanya Wolff	Rubin	2	N	No	No	10.1101/2024.01.09.574419	Meissner; 2024	3035924			VT024634-x-GMR_19G02	w; VT024634-p65ADZp in attP40; 19G02-ZpGdbd in attP2
SS64548	Adult	Jens Goldammer	Rubin	1	N	No	No	10.1101/2024.01.09.574419	Meissner; 2024	3039088	CL214		VT006549-x-GMR_18F12	w[1118]; P{y[+t7.7] w[+mC]=VT006549-p65.AD}attP40/CyO; P{y[+t7.7] w[+mC]=R18F12-GAL4.DBD}attP2/TM6B, Tb[1]
SS64550	Adult	Jens Goldammer	Rubin	2	N	No	No	10.1101/2024.01.09.574419	Meissner; 2024	3039046	CRE106		GMR_48C08-x-VT033614	w[1118]; P{y[+t7.7] w[+mC]=R48C08-p65.AD}JK22C; P{y[+t7.7] w[+mC]=VT033614-GAL4.DBD}attP2
SS64560	Adult	Jens Goldammer	Rubin	1	N	No	Yes	10.1101/2024.01.09.574419	Meissner; 2024	3039051		5813054604, 1469663014	VT008534-x-VT058427	w[1118]; P{y[+t7.7] w[+mC]=VT008534-p65.AD}attP40/CyO; P{y[+t7.7] w[+mC]=VT058427-GAL4.DBD}attP2
SS64601	Adult	DI	DI	2	N	No	No	10.1101/2024.01.09.574419	Meissner; 2024	3036279	DNp48		VT031392-x-VT063560	w[1118]; P{y[+t7.7] w[+mC]=VT031392-p65.AD}attP40; P{y[+t7.7] w[+mC]=VT063560-GAL4.DBD}attP2
SS64679	Adult	DI	DI	1	N	No	No	10.1101/2024.01.09.574419	Meissner; 2024	3036277	DNg03x~5, DNg05		GMR_19G08-x-VT049125	w[1118]; P{y[+t7.7] w[+mC]=R19G08-p65.AD}attP40/CyO, P{w[+mC]=2xTb[1]-RFP}CyO; P{y[+t7.7] w[+mC]=VT049125-GAL4.DBD}attP2
SS64882	Adult	DI	DI	2	N	No	No	10.1101/2024.01.09.574419	Meissner; 2024	3036301	DNg39		VT037566-x-VT038873	w[1118]; P{y[+t7.7] w[+mC]=VT037566-p65.AD}attP40; P{y[+t7.7] w[+mC]=VT038873-GAL4.DBD}attP2
SS64893	Adult	DI	DI	2	N	No	No	10.1101/2024.01.09.574419	Meissner; 2024	3036318	FMN (steering, mnb2?)		VT042758-x-GMR_71D08	w[1118]; P{y[+t7.7] w[+mC]=VT042758-p65.AD}attP40/CyO, P{w[+mC]=2xTb[1]-RFP}CyO; P{y[+t7.7] w[+mC]=R71D08-GAL4.DBD}attP2
SS64901	Adult	DI	DI	2	N	No	No	10.1101/2024.01.09.574419	Meissner; 2024	3036671	NMN		GMR_10A12-x-GMR_48F12	w[1118]; P{y[+t7.7] w[+mC]=R10A12-p65.AD}attP40; P{y[+t7.7] w[+mC]=R48F12-GAL4.DBD}attP2/TM6, Tb[1]
SS65066	Adult	Tanya Wolff	Rubin	2	N	No	No	10.1101/2024.01.09.574419	Meissner; 2024	3043911			VT046778-x-VT026755	w; VT046778-p65ADZp in attP40; VT026755-ZpGDBD in attP2
SS65156	Adult	Tanya Wolff	Rubin	1	N	No	No	10.1101/2024.01.09.574419	Meissner; 2024	3040516			VT003476-x-GMR_19E06	w[1118]; P{y[+t7.7] w[+mC]=VT003476-p65.AD}attP40; P{y[+t7.7] w[+mC]=R19E06-GAL4.DBD}attP2
SS65207	Adult	Jens Goldammer	Rubin	2	N	No	No	10.1101/2024.01.09.574419	Meissner; 2024	3039053		5901230859	VT027323-x-GMR_50A08	w[1118]; P{y[+t7.7] w[+mC]=VT027323-p65.AD}attP40/CyO; P{y[+t7.7] w[+mC]=R50A08-GAL4.DBD}attP2/TM6, Tb[1]
SS65209	Adult	Jens Goldammer	Rubin	2	N	No	No	10.1101/2024.01.09.574419	Meissner; 2024	3039090	CL066		VT019723-x-VT022237	w[1118]; P{y[+t7.7] w[+mC]=VT019723-p65.AD}attP40; P{y[+t7.7] w[+mC]=VT022237-GAL4.DBD}attP2/T(2;3)B3, CyO: TM6B, Tb[1]
SS65212	Adult	Jens Goldammer	Rubin	1	N	No	Yes	10.1101/2024.01.09.574419	Meissner; 2024	3039054	ATL030		GMR_26A06-x-GMR_60D08	w[1118]; P{y[+t7.7] w[+mC]=R26A06-p65.AD}JK22C; P{y[+t7.7] w[+mC]=R60D08-GAL4.DBD}attP2
SS65260	Adult	Tanya Wolff	Rubin	2	N	No	No	10.1101/2024.01.09.574419	Meissner; 2024	3040115			VT018654-x-VT045282	w[1118]; P{y[+t7.7] w[+mC]=VT018654-p65.AD}attP40; P{y[+t7.7] w[+mC]=VT045282-GAL4.DBD}attP2
SS65340	Adult	Tanya Wolff	Rubin	1	N	No	No	10.1101/2024.01.09.574419	Meissner; 2024	3043959			GMR_19E06-x-GMR_38E07	w[1118]; P{y[+t7.7] w[+mC]=R19E06-p65.AD}attP40; P{y[+t7.7] w[+mC]=R38E07-GAL4.DBD}attP2
SS65397	Adult	Jens Goldammer	Rubin	2	N	No	No	10.1101/2024.01.09.574419	Meissner; 2024	3039275	PVLP143		GMR_24A02-x-VT030541	w[1118]; P{y[+t7.7] w[+mC]=R24A02-p65.AD}attP40/CyO; P{y[+t7.7] w[+mC]=VT030541-GAL4.DBD}attP2/TM6B, Tb[1]
SS65402	Adult	Jens Goldammer	Rubin	1	N	No	No	10.1101/2024.01.09.574419	Meissner; 2024	3039178	OCG07		GMR_80A01-x-GMR_40C02	w[1118]; P{y[+t7.7] w[+mC]=R80A01-p65.AD}attP40/CyO; P{y[+t7.7] w[+mC]=R40C02-GAL4.DBD}attP2/TM6B, Tb[1]
SS65417	Adult	Jens Goldammer	Rubin	1	N	No	No	10.1101/2024.01.09.574419	Meissner; 2024	3039099	PLP077, No Name: 1564784383, 787564302?, 821056011?, 943071287?, 911354322?, 2275905545?, similar WEDPN10A?, WED085?, WED087		VT063193-x-VT038778	w[1118]; P{y[+t7.7] w[+mC]=VT063193-p65.AD}attP40; P{y[+t7.7] w[+mC]=VT038778-GAL4.DBD}attP2/T(2;3)B3, CyO: TM6B, Tb[1]
SS65433	Adult	Kaiyu Wang	Dickson	1	N	No	No	10.1101/2024.01.09.574419	Meissner; 2024	3035329			VT033618-x-VT058545	w[1118]; P{y[+t7.7] w[+mC]=VT033618-p65.AD}attP40; P{y[+t7.7] w[+mC]=VT058545-GAL4.DBD}attP2
SS65434	Adult	Kaiyu Wang	Dickson	1	N	No	No	10.1101/2024.01.09.574419	Meissner; 2024	3035330	PI		VT058545-x-VT033646	w[1118]; P{y[+t7.7] w[+mC]=VT058545-p65.AD}attP40/CyO, P{w[+mC]=2xTb[1]-RFP}CyO; P{y[+t7.7] w[+mC]=VT033646-GAL4.DBD}attP2/TM6B, Tb[1]
SS65441	Adult	DI	DI	1	N	No	No	10.1101/2024.01.09.574419	Meissner; 2024	3036272	DNp43		VT002021-x-VT008977	w[1118]; P{y[+t7.7] w[+mC]=VT002021-p65.AD}attP40; P{y[+t7.7] w[+mC]=VT008977-GAL4.DBD}attP2
SS65449	Adult	Ryo Minegishi	Dickson	1	N	Yes	No	10.1101/2024.01.09.574419	Meissner; 2024	3036561	LBI60		VT008646-x-VT024647	w[1118]; P{y[+t7.7] w[+mC]=VT008646-p65.AD}attP40; P{y[+t7.7] w[+mC]=VT024647-GAL4.DBD}attP2
SS65483	Adult	DI	DI	1	N	No	No	10.1101/2024.01.09.574419	Meissner; 2024	3036270	New DNa, DNa13		VT047755-x-VT023490	w[1118]; P{y[+t7.7] w[+mC]=VT047755-p65.AD}attP40; P{y[+t7.7] w[+mC]=VT023490-GAL4.DBD}attP2
SS65486	Adult	DI	DI	1	N	No	No	10.1101/2024.01.09.574419	Meissner; 2024	3036309	DNax2		VT047755-x-GMR_49D02	w[1118]; P{y[+t7.7] w[+mC]=VT047755-p65.AD}attP40/CyO, P{w[+mC]=2xTb[1]-RFP}CyO; P{y[+t7.7] w[+mC]=R49D02-GAL4.DBD}attP2
SS65487	Adult	DI	DI	1	N	No	No	10.1101/2024.01.09.574419	Meissner; 2024	3036313	DNax~7		VT047755-x-GMR_64A12	w[1118]; P{y[+t7.7] w[+mC]=VT047755-p65.AD}attP40; P{y[+t7.7] w[+mC]=R64A12-GAL4.DBD}attP2
SS65544	Adult	DI	DI	2	N	No	No	10.1101/2024.01.09.574419	Meissner; 2024	3036286	DNa06		VT023490-x-VT025717	w[1118]; P{y[+t7.7] w[+mC]=VT023490-p65.AD}attP40; P{y[+t7.7] w[+mC]=VT025717-GAL4.DBD}attP2
SS65564	Adult	Ryo Minegishi	Dickson	2	N	No	No	10.1101/2024.01.09.574419	Meissner; 2024	3036544			VT059792-x-VT058919	w[1118]; P{y[+t7.7] w[+mC]=VT059792-p65.AD}attP40; P{y[+t7.7] w[+mC]=VT058919-GAL4.DBD}attP2
SS65590	Adult	Ryo Minegishi	Dickson	2	N	No	No	10.1101/2024.01.09.574419	Meissner; 2024	3036582			VT016973-x-GMR_31E11	w[1118]; P{y[+t7.7] w[+mC]=VT016973-p65.AD}attP40/CyO, P{w[+mC]=2xTb[1]-RFP}CyO; P{y[+t7.7] w[+mC]=R31E11-GAL4.DBD}attP2
SS65687	Adult	Ryo Minegishi	Dickson	2	N	No	No	10.1101/2024.01.09.574419	Meissner; 2024	3036527			GMR_26B06-x-VT000926	w[1118]; P{y[+t7.7] w[+mC]=R26B06-p65.AD}attP40; P{y[+t7.7] w[+mC]=VT000926-GAL4.DBD}attP2
SS65692	Adult	Ryo Minegishi	Dickson	2	N	No	No	10.1101/2024.01.09.574419	Meissner; 2024	3036518	LUA9		GMR_54B03-x-VT002042	w[1118]; P{y[+t7.7] w[+mC]=R54B03-p65.AD}attP40; P{y[+t7.7] w[+mC]=VT002042-GAL4.DBD}attP2
SS65693	Adult	Ryo Minegishi	Dickson	1	N	No	No	10.1101/2024.01.09.574419	Meissner; 2024	3036516			GMR_48G01-x-VT012438	w[1118]; P{y[+t7.7] w[+mC]=R48G01-p65.AD}attP40; P{y[+t7.7] w[+mC]=VT012438-GAL4.DBD}attP2
SS65700	Adult	Ryo Minegishi	Dickson	2	N	No	No	10.1101/2024.01.09.574419	Meissner; 2024	3036559	LBA42		GMR_53C03-x-VT009068	w[1118]; P{y[+t7.7] w[+mC]=R53C03-p65.AD}attP40; P{y[+t7.7] w[+mC]=VT009068-GAL4.DBD}attP2
SS65710	Adult	Ryo Minegishi	Dickson	1	N	Yes	No	10.1101/2024.01.09.574419	Meissner; 2024	3036537	LBI60		VT024647-x-VT008646	w[1118]; P{y[+t7.7] w[+mC]=VT024647-p65.AD}attP40; P{y[+t7.7] w[+mC]=VT008646-GAL4.DBD}attP2
SS65765	Adult	Ryo Minegishi	Dickson	2	N	No	No	10.1101/2024.01.09.574419	Meissner; 2024	3036588			VT037519-x-GMR_53H03	w[1118]; P{y[+t7.7] w[+mC]=VT037519-p65.AD}attP40/CyO, P{w[+mC]=2xTb[1]-RFP}CyO; P{y[+t7.7] w[+mC]=R53H03-GAL4.DBD}attP2
SS65855	Adult	Tanya Wolff	Rubin	1	N	No	No	10.1101/2024.01.09.574419	Meissner; 2024	3036156			GMR_38C04-x-GMR_67D09	w[1118]; P{y[+t7.7] w[+mC]=R67D09-GAL4.DBD}attP2 PBac{y[+mDint2] w[+mC]=R38C04-p65.AD}VK00027
SS65925	Adult	Jens Goldammer	Rubin	2	N	No	No	10.1101/2024.01.09.574419	Meissner; 2024	3039061	PS160		VT017645-x-GMR_53B06	w[1118]; P{y[+t7.7] w[+mC]=VT017645-p65.AD}attP40; P{y[+t7.7] w[+mC]=R53B06-GAL4.DBD}attP2
SS65936	Adult	Jens Goldammer	Rubin	1	N	No	No	10.1101/2024.01.09.574419	Meissner; 2024	3039278	ATL011-ATL012 or ATL017-ATL018		GMR_30A04-x-VT049126	w[1118]; P{y[+t7.7] w[+mC]=R30A04-p65.AD}JK22C/CyO; P{y[+t7.7] w[+mC]=VT049126-GAL4.DBD}attP2/TM6B, Tb[1]
SS65940	Adult	Jens Goldammer	Rubin	2	N	No	No	10.1101/2024.01.09.574419	Meissner; 2024	3039570	PLP131		VT034612-x-VT032162	w[1118]; P{y[+t7.7] w[+mC]=VT034612-p65.AD}attP40; P{y[+t7.7] w[+mC]=VT032162-GAL4.DBD}attP2/T(2;3)B3, CyO: TM6B, Tb[1]
SS65942	Adult	Jens Goldammer	Rubin	1	N	No	Yes	10.1101/2024.01.09.574419	Meissner; 2024	3039104	SMP496		GMR_64H12-x-GMR_78H05	w[1118]; P{y[+t7.7] w[+mC]=R64H12-p65.AD}JK22C/CyO; P{y[+t7.7] w[+mC]=R78H05-GAL4.DBD}attP2/TM6B, Tb[1]
SS66127	Adult	Jens Goldammer	Rubin	4	N	No	Yes	10.1101/2024.01.09.574419	Meissner; 2024	3039105	SMP204		VT044844-x-VT009068	w[1118]; P{y[+t7.7] w[+mC]=VT044844-p65.AD}attP40; P{y[+t7.7] w[+mC]=VT009068-GAL4.DBD}attP2
SS66144	Adult	DI	DI	1	N	No	No	10.1101/2024.01.09.574419	Meissner; 2024	3037168	NMN		GMR_16H01-x-GMR_22H10	w[1118]; P{y[+t7.7] w[+mC]=R16H01-p65.AD}attP40; P{y[+t7.7] w[+mC]=R22H10-GAL4.DBD}attP2/TM6B, Tb[+]
SS66145	Adult	DI	DI	2	N	No	No	10.1101/2024.01.09.574419	Meissner; 2024	3037169	NMN		GMR_39E01-x-GMR_22H10	w[1118]; P{y[+t7.7] w[+mC]=R39E01-p65.AD}attP40/CyO, P{w[+mC]=2xTb[1]-RFP}CyO; P{y[+t7.7] w[+mC]=R22H10-GAL4.DBD}attP2
SS66153	Adult	DI	DI	1	N	No	No	10.1101/2024.01.09.574419	Meissner; 2024	3037172	DNp44		GMR_24F02-x-VT024643	w[1118]; P{y[+t7.7] w[+mC]=R24F02-p65.AD}attP40; P{y[+t7.7] w[+mC]=VT024643-GAL4.DBD}attP2
SS66182	Adult	DI	DI	1	N	No	No	10.1101/2024.01.09.574419	Meissner; 2024	3037185	DNg43		GMR_32H08-x-VT003236	w[1118]; P{y[+t7.7] w[+mC]=R32H08-p65.AD}attP40; P{y[+t7.7] w[+mC]=VT003236-GAL4.DBD}attP2
SS66183	Adult	DI	DI	1	N	No	No	10.1101/2024.01.09.574419	Meissner; 2024	3037186	DNa10		GMR_47D05-x-VT044168	w[1118]; P{y[+t7.7] w[+mC]=R47D05-p65.AD}attP40; P{y[+t7.7] w[+mC]=VT044168-GAL4.DBD}attP2
SS66208	Adult	DI	DI	1	N	No	No	10.1101/2024.01.09.574419	Meissner; 2024	3037230	CMN multi		GMR_71D08-x-VT050222	w[1118]; P{y[+t7.7] w[+mC]=R71D08-p65.AD}attP40; P{y[+t7.7] w[+mC]=VT050222-GAL4.DBD}attP2
SS66270	Adult	DI	DI	2	N	No	No	10.1101/2024.01.09.574419	Meissner; 2024	3037205	DNg20		GMR_64B08-x-GMR_65D05	w[1118]; P{y[+t7.7] w[+mC]=R64B08-p65.AD}attP40; P{y[+t7.7] w[+mC]=R65D05-GAL4.DBD}attP2
SS66402	Adult	DI	DI	1	N	No	No	10.1101/2024.01.09.574419	Meissner; 2024	3036947	LT IN (stop)		VT027767-x-VT029592	w[1118]; P{y[+t7.7] w[+mC]=VT027767-p65.AD}attP40; P{y[+t7.7] w[+mC]=VT029592-GAL4.DBD}attP2
SS66732	Adult	Jens Goldammer	Rubin	4	N	No	No	10.1101/2024.01.09.574419	Meissner; 2024	3039112	PS124		VT034258-x-GMR_70D06	w[1118]; P{y[+t7.7] w[+mC]=VT034258-p65.AD}attP40; P{y[+t7.7] w[+mC]=R70D06-GAL4.DBD}attP2
SS66736	Adult	Jens Goldammer	Rubin	2	N	No	No	10.1101/2024.01.09.574419	Meissner; 2024	3039185	PS218; similar PS220, PS221		GMR_42B02-x-VT049118	w[1118]; P{y[+t7.7] w[+mC]=R42B02-p65.AD}attP40/CyO; P{y[+t7.7] w[+mC]=VT049118-GAL4.DBD}attP2/TM6B, Tb[1]
SS66737	Adult	Jens Goldammer	Rubin	1	N	No	No	10.1101/2024.01.09.574419	Meissner; 2024	3039114	CL053		VT016278-x-GMR_50C04	w[1118]; P{y[+t7.7] w[+mC]=VT016278-p65.AD}attP40; P{y[+t7.7] w[+mC]=R50C04-GAL4.DBD}attP2
SS66744	Adult	Jens Goldammer	Rubin	2	N	No	No	10.1101/2024.01.09.574419	Meissner; 2024	3039118		1345471376	GMR_18A03-x-VT002063	w[1118]; P{y[+t7.7] w[+mC]=R18A03-p65.AD}attP40; P{y[+t7.7] w[+mC]=VT002063-GAL4.DBD}attP2/T(2;3)B3, CyO: TM6B, Tb[1]
SS66754	Adult	Jens Goldammer	Rubin	2	N	No	No	10.1101/2024.01.09.574419	Meissner; 2024	3039123	IB038		VT016841-x-GMR_95F09	w[1118]; P{y[+t7.7] w[+mC]=VT016841-p65.AD}attP40; P{y[+t7.7] w[+mC]=R95F09-GAL4.DBD}attP2/T(2;3)B3, CyO: TM6B, Tb[1]
SS66758	Adult	Jens Goldammer	Rubin	1	N	No	Yes	10.1101/2024.01.09.574419	Meissner; 2024	3039186	PLP231		VT033054-x-GMR_44E06	w[1118]; P{y[+t7.7] w[+mC]=VT033054-p65.AD}attP40/CyO, P{w[+mC]=2xTb[1]-RFP}CyO; P{y[+t7.7] w[+mC]=R44E06-GAL4.DBD}attP2/TM6B, Tb[1]
SS66766	Adult	Jens Goldammer	Rubin	1	N	No	No	10.1101/2024.01.09.574419	Meissner; 2024	3039281	PS220, PS221, PS218		GMR_42B02-x-VT031495	w[1118]; P{y[+t7.7] w[+mC]=R42B02-p65.AD}attP40; P{y[+t7.7] w[+mC]=VT031495-GAL4.DBD}attP2
SS66768	Adult	Jens Goldammer	Rubin	1	N	No	No	10.1101/2024.01.09.574419	Meissner; 2024	3039130	PS220, PS221, some PS218?		VT044959-x-GMR_42B02	w[1118]; P{y[+t7.7] w[+mC]=VT044959-p65.AD}attP40; P{y[+t7.7] w[+mC]=R42B02-GAL4.DBD}attP2
SS66769	Adult	Jens Goldammer	Rubin	2	N	No	No	10.1101/2024.01.09.574419	Meissner; 2024	3039131	PS051		VT058382-x-VT050218	w[1118]; P{y[+t7.7] w[+mC]=VT058382-p65.AD}attP40/CyO; P{y[+t7.7] w[+mC]=VT050218-GAL4.DBD}attP2/TM6B, Tb[1]
SS66859	Adult	Kaiyu Wang	Dickson	1	N	No	No	10.1101/2024.01.09.574419	Meissner; 2024	3036237	pMP_PN		VT064581-x-VT022246	w[1118]; P{y[+t7.7] w[+mC]=VT064581-p65.AD}attP40/CyO, P{w[+mC]=2xTb[1]-RFP}CyO; P{y[+t7.7] w[+mC]=VT022246-GAL4.DBD}attP2
SS66941	Adult	Ryo Minegishi	Dickson	1	N	Yes	No	10.1101/2024.01.09.574419	Meissner; 2024	3036726			GMR_44B10-x-VT042358	w[1118]; P{y[+t7.7] w[+mC]=R44B10-p65.AD}attP40; P{y[+t7.7] w[+mC]=VT042358-GAL4.DBD}attP2
SS66968	Adult	Ryo Minegishi	Dickson	1	N	Yes	No	10.1101/2024.01.09.574419	Meissner; 2024	3036758			VT042358-x-GMR_44B10	w[1118]; P{y[+t7.7] w[+mC]=VT042358-p65.AD}attP40/CyO, P{w[+mC]=2xTb[1]-RFP}CyO; P{y[+t7.7] w[+mC]=R44B10-GAL4.DBD}attP2
SS67050	Adult	DI	DI	2	N	No	No	10.1101/2024.01.09.574419	Meissner; 2024	3036625	DNOVSs		VT016254-x-VT026665	w[1118]; P{y[+t7.7] w[+mC]=VT016254-p65.AD}attP40/CyO, P{w[+mC]=2xTb[1]-RFP}CyO; P{y[+t7.7] w[+mC]=VT026665-GAL4.DBD}attP2
SS67102	Adult	DI	DI	1	N	No	No	10.1101/2024.01.09.574419	Meissner; 2024	3036642	DNg62		GMR_19F01-x-VT023471	w[1118]; P{y[+t7.7] w[+mC]=R19F01-p65.AD}attP40; P{y[+t7.7] w[+mC]=VT023471-GAL4.DBD}attP2
SS67116	Adult	DI	DI	1	N	No	No	10.1101/2024.01.09.574419	Meissner; 2024	3036647	WN>NN-IN		VT016254-x-VT031567	w[1118]; P{y[+t7.7] w[+mC]=VT016254-p65.AD}attP40/CyO, P{w[+mC]=2xTb[1]-RFP}CyO; P{y[+t7.7] w[+mC]=VT031567-GAL4.DBD}attP2
SS67122	Adult	DI	DI	2	N	No	No	10.1101/2024.01.09.574419	Meissner; 2024	3036648	DNp30		VT008133-x-VT046808	w[1118]; P{y[+t7.7] w[+mC]=VT008133-p65.AD}attP40; P{y[+t7.7] w[+mC]=VT046808-GAL4.DBD}attP2
SS67124	Adult	DI	DI	1	N	No	No	10.1101/2024.01.09.574419	Meissner; 2024	3036649	DNg05		VT026777-x-VT037825	w[1118]; P{y[+t7.7] w[+mC]=VT026777-p65.AD}attP40; P{y[+t7.7] w[+mC]=VT037825-GAL4.DBD}attP2
SS67133	Adult	DI	DI	1	N	No	No	10.1101/2024.01.09.574419	Meissner; 2024	3036655	DNg52		VT046828-x-VT050112	w[1118]; P{y[+t7.7] w[+mC]=VT046828-p65.AD}attP40; P{y[+t7.7] w[+mC]=VT050112-GAL4.DBD}attP2/TM6B, Tb[1]
SS67162	Adult	DI	DI	2	N	No	No	10.1101/2024.01.09.574419	Meissner; 2024	3036662	DNg04, DNg05, other?		VT037825-x-VT026777	w[1118]; P{y[+t7.7] w[+mC]=VT037825-p65.AD}attP40; P{y[+t7.7] w[+mC]=VT026777-GAL4.DBD}attP2
SS67175	Adult	DI	DI	2	N	No	No	10.1101/2024.01.09.574419	Meissner; 2024	3036665	New DNg (no neurite in brain)		VT044957-x-GMR_36G02	w[1118]; P{y[+t7.7] w[+mC]=VT044957-p65.AD}attP40; P{y[+t7.7] w[+mC]=R36G02-GAL4.DBD}attP2
SS67217	Adult	DI	DI	1	N	No	No	10.1101/2024.01.09.574419	Meissner; 2024	3036675	DNg76		VT040430-x-GMR_79D11	w[1118]; P{y[+t7.7] w[+mC]=VT040430-p65.AD}attP40; P{y[+t7.7] w[+mC]=R79D11-GAL4.DBD}attP2
SS67311	Adult	Ryo Minegishi	Dickson	2	N	No	No	10.1101/2024.01.09.574419	Meissner; 2024	3036541	MN		VT038450-x-VT049130	w[1118]; P{y[+t7.7] w[+mC]=VT038450-p65.AD}attP40/CyO, P{w[+mC]=2xTb[1]-RFP}CyO; P{y[+t7.7] w[+mC]=VT049130-GAL4.DBD}attP2/TM6B, Tb[1]
SS67322	Adult	Ryo Minegishi	Dickson	4	N	No	No	10.1101/2024.01.09.574419	Meissner; 2024	3036519	LBL57		VT014097-x-VT025281	w[1118]; P{y[+t7.7] w[+mC]=VT014097-p65.AD}attP40; P{y[+t7.7] w[+mC]=VT025281-GAL4.DBD}attP2
SS67325	Adult	Ryo Minegishi	Dickson	1	N	No	No	10.1101/2024.01.09.574419	Meissner; 2024	3036548	DN		VT020600-x-VT043788	w[1118]; P{y[+t7.7] w[+mC]=VT020600-p65.AD}attP40; P{y[+t7.7] w[+mC]=VT043788-GAL4.DBD}attP2
SS67361	Adult	Ryo Minegishi	Dickson	2	N	No	No	10.1101/2024.01.09.574419	Meissner; 2024	3036567			VT024647-x-VT020739	w[1118]; P{y[+t7.7] w[+mC]=VT024647-p65.AD}attP40; P{y[+t7.7] w[+mC]=VT020739-GAL4.DBD}attP2
SS67416	Adult	Ryo Minegishi	Dickson	2	N	No	No	10.1101/2024.01.09.574419	Meissner; 2024	3036608	LBA72		GMR_18A03-x-GMR_52F12	w[1118]; P{y[+t7.7] w[+mC]=R18A03-p65.AD}attP40; P{y[+t7.7] w[+mC]=R52F12-GAL4.DBD}attP2
SS67451	Adult	Ryo Minegishi	Dickson	2	N	No	No	10.1101/2024.01.09.574419	Meissner; 2024	3036546	LBA35		GMR_44A08-x-VT057282	w[1118]; P{y[+t7.7] w[+mC]=R44A08-p65.AD}attP40; P{y[+t7.7] w[+mC]=VT057282-GAL4.DBD}attP2
SS67459	Adult	Ryo Minegishi	Dickson	1	N	No	No	10.1101/2024.01.09.574419	Meissner; 2024	3036554	LBA14		GMR_52B10-x-VT026018	w[1118]; P{y[+t7.7] w[+mC]=R52B10-p65.AD}attP40; P{y[+t7.7] w[+mC]=VT026018-GAL4.DBD}attP2
SS67473	Adult	Ryo Minegishi	Dickson	2	N	No	No	10.1101/2024.01.09.574419	Meissner; 2024	3036538	LUI15		GMR_82F02-x-VT014336	w[1118]; P{y[+t7.7] w[+mC]=R82F02-p65.AD}attP40; P{y[+t7.7] w[+mC]=VT014336-GAL4.DBD}attP2
SS67476	Adult	Ryo Minegishi	Dickson	2	N	No	No	10.1101/2024.01.09.574419	Meissner; 2024	3036532	LUI15		GMR_82F02-x-GMR_81A06	w[1118]; P{y[+t7.7] w[+mC]=R82F02-p65.AD}attP40; P{y[+t7.7] w[+mC]=R81A06-GAL4.DBD}attP2
SS67500	Adult	Tanya Wolff	Rubin	1	N	No	No	10.1101/2024.01.09.574419	Meissner; 2024	3039987	FB8D?		VT049652-x-VT032417	w[1118]; P{y[+t7.7] w[+mC]=VT049652-p65.AD}attP40/CyO, P{w[+mC]=2xTb[1]-RFP}CyO; P{y[+t7.7] w[+mC]=VT032417-GAL4.DBD}attP2/TM6B, Tb[1]
SS67641	Adult	Gerry Rubin	Rubin	2	N	No	No	10.1101/2024.01.09.574419	Meissner; 2024	3036661	MBON20		GMR_24A06-x-VT049978	w[1118]; P{y[+t7.7] w[+mC]=R24A06-p65.AD}attP40; P{y[+t7.7] w[+mC]=VT049978-GAL4.DBD}attP2
SS67674	Adult	Jens Goldammer	Rubin	1	N	No	No	10.1101/2024.01.09.574419	Meissner; 2024	3039134	PS274		GMR_48G06-x-VT031157	w[1118]; P{y[+t7.7] w[+mC]=R48G06-p65.AD}attP40; P{y[+t7.7] w[+mC]=VT031157-GAL4.DBD}attP2
SS67678	Adult	Jens Goldammer	Rubin	1	N	No	No	10.1101/2024.01.09.574419	Meissner; 2024	3039135	PS124		GMR_70D06-x-VT049113	w[1118]; P{y[+t7.7] w[+mC]=R70D06-p65.AD}attP40/CyO; P{y[+t7.7] w[+mC]=VT049113-GAL4.DBD}attP2/TM6B, Tb[1]
SS67683	Adult	Jens Goldammer	Rubin	2	N	No	No	10.1101/2024.01.09.574419	Meissner; 2024	3039193	SMP192		VT044958-x-VT003228	w[1118]; P{y[+t7.7] w[+mC]=VT044958-p65.AD}attP40; P{y[+t7.7] w[+mC]=VT003228-GAL4.DBD}attP2
SS67692	Adult	Jens Goldammer	Rubin	1	N	No	Yes	10.1101/2024.01.09.574419	Meissner; 2024	3039197	IB065		VT034612-x-GMR_23H01	w[1118]; P{y[+t7.7] w[+mC]=VT034612-p65.AD}attP40; P{y[+t7.7] w[+mC]=R23H01-GAL4.DBD}attP2/T(2;3)B3, CyO: TM6B, Tb[1]
SS67739	Adult	Gerry Rubin	Rubin	1	N	No	No	10.1101/2024.01.09.574419	Meissner; 2024	3036638	unknown		VT049978-x-VT040027	w[1118]; P{y[+t7.7] w[+mC]=VT049978-p65.AD}attP40; P{y[+t7.7] w[+mC]=VT040027-GAL4.DBD}attP2
SS67754	Adult	Gerry Rubin	Rubin	1	N	No	Yes	10.1101/2024.01.09.574419	Meissner; 2024	3039960	unknown		GMR_14C08-x-VT037491	w[1118]; P{y[+t7.7] w[+mC]=R14C08-p65.AD}attP40; P{y[+t7.7] w[+mC]=VT037491-GAL4.DBD}attP2
SS67962	Adult	Jens Goldammer	Rubin	1	N	No	No	10.1101/2024.01.09.574419	Meissner; 2024	3039159	PLP106, PLP109		VT045636-x-VT002081	w[1118]; P{y[+t7.7] w[+mC]=VT045636-p65.AD}attP40; P{y[+t7.7] w[+mC]=VT002081-GAL4.DBD}attP2
SS67976	Adult	Ryo Minegishi	Dickson	1	N	Yes	No	10.1101/2024.01.09.574419	Meissner; 2024	3040161	LUL161		VT017375-x-VT017665	w[1118]; P{y[+t7.7] w[+mC]=VT017375-p65.AD}attP40/CyO, P{w[+mC]=2xTb[1]-RFP}CyO; P{y[+t7.7] w[+mC]=VT017665-GAL4.DBD}attP2/TM6B, Tb[1]
SS68079	Adult	Tanya Wolff	Rubin	1	N	No	No	10.1101/2024.01.09.574419	Meissner; 2024	3043988			GMR_52F11-x-GMR_89C01	w[1118]; P{y[+t7.7] w[+mC]=R52F11-p65.AD}attP40; P{y[+t7.7] w[+mC]=R89C01-GAL4.DBD}attP2
SS68218	Adult	Ryo Minegishi	Dickson	2	N	No	No	10.1101/2024.01.09.574419	Meissner; 2024	3037109	LBI31		GMR_26C06-x-GMR_60G04	w[1118]; P{y[+t7.7] w[+mC]=R26C06-p65.AD}attP40; P{y[+t7.7] w[+mC]=R60G04-GAL4.DBD}attP2
SS68219	Adult	Ryo Minegishi	Dickson	2	N	No	No	10.1101/2024.01.09.574419	Meissner; 2024	3037088			GMR_26C06-x-GMR_45D07	w[1118]; P{y[+t7.7] w[+mC]=R26C06-p65.AD}attP40; P{y[+t7.7] w[+mC]=R45D07-GAL4.DBD}attP2/TM6B, Tb[1]
SS68220	Adult	Ryo Minegishi	Dickson	1	N	Yes	No	10.1101/2024.01.09.574419	Meissner; 2024	3037045	LBI31		GMR_26C06-x-VT002408	w[1118]; P{y[+t7.7] w[+mC]=R26C06-p65.AD}attP40; P{y[+t7.7] w[+mC]=VT002408-GAL4.DBD}attP2
SS68223	Adult	Ryo Minegishi	Dickson	2	N	No	No	10.1101/2024.01.09.574419	Meissner; 2024	3037120			GMR_26E07-x-GMR_37F06	w; 26E07-p65ADZp in attP40; 37F06-ZpGDBD in attP2
SS68237	Adult	Ryo Minegishi	Dickson	4	N	No	No	10.1101/2024.01.09.574419	Meissner; 2024	3037057	LBA42		GMR_39D12-x-VT038208	w[1118]; P{y[+t7.7] w[+mC]=R39D12-p65.AD}attP40; P{y[+t7.7] w[+mC]=VT038208-GAL4.DBD}attP2
SS68285	Adult	Ryo Minegishi	Dickson	2	N	No	No	10.1101/2024.01.09.574419	Meissner; 2024	3037104	LBI26		GMR_75H04-x-GMR_22F05	w[1118]; P{y[+t7.7] w[+mC]=R75H04-p65.AD}attP40; P{y[+t7.7] w[+mC]=R22F05-GAL4.DBD}attP2
SS68298	Adult	Ryo Minegishi	Dickson	1	N	Yes	No	10.1101/2024.01.09.574419	Meissner; 2024	3037055			GMR_53A06-x-VT057245	w[1118]; P{y[+t7.7] w[+mC]=R53A06-p65.AD}attP40; P{y[+t7.7] w[+mC]=VT057245-GAL4.DBD}attP2
SS68371	Adult	DI	DI	1	N	No	No	10.1101/2024.01.09.574419	Meissner; 2024	3037184	DNg43		VT027273-x-VT003236	w[1118]; P{y[+t7.7] w[+mC]=VT027273-p65.AD}attP40/CyO, P{w[+mC]=2xTb[1]-RFP}CyO; P{y[+t7.7] w[+mC]=VT003236-GAL4.DBD}attP2
SS68377	Adult	DI	DI	1	N	No	No	10.1101/2024.01.09.574419	Meissner; 2024	3037190	DNg49		VT049727-x-VT026839	w[1118]; P{y[+t7.7] w[+mC]=VT049727-p65.AD}attP40/CyO, P{w[+mC]=2xTb[1]-RFP}CyO; P{y[+t7.7] w[+mC]=VT026839-GAL4.DBD}attP2
SS68428	Adult	Ryo Minegishi	Dickson	3	N	No	No	10.1101/2024.01.09.574419	Meissner; 2024	3037111	LBI31		VT056582-x-GMR_60G04	w[1118]; P{y[+t7.7] w[+mC]=VT056582-p65.AD}attP40/CyO, P{w[+mC]=2xTb[1]-RFP}CyO; P{y[+t7.7] w[+mC]=R60G04-GAL4.DBD}attP2
SS68443	Adult	Ryo Minegishi	Dickson	1	N	Yes	No	10.1101/2024.01.09.574419	Meissner; 2024	3037087			VT046053-x-GMR_53G01	w[1118]; P{y[+t7.7] w[+mC]=VT046053-p65.AD}attP40/CyO, P{w[+mC]=2xTb[1]-RFP}CyO; P{y[+t7.7] w[+mC]=R53G01-GAL4.DBD}attP2/TM6B, Tb[1]
SS68466	Adult	Ryo Minegishi	Dickson	1	N	Yes	No	10.1101/2024.01.09.574419	Meissner; 2024	3037038	LUL68		VT030557-x-VT006393	w[1118]; P{y[+t7.7] w[+mC]=VT030557-p65.AD}attP40; P{y[+t7.7] w[+mC]=VT006393-GAL4.DBD}attP2
SS68475	Adult	Ryo Minegishi	Dickson	1	N	Yes	No	10.1101/2024.01.09.574419	Meissner; 2024	3037102	LBI33		GMR_13H04-x-GMR_51B02	w[1118]; P{y[+t7.7] w[+mC]=R13H04-p65.AD}attP40; P{y[+t7.7] w[+mC]=R51B02-GAL4.DBD}attP2
SS68512	Adult	Ryo Minegishi	Dickson	1	N	Yes	No	10.1101/2024.01.09.574419	Meissner; 2024	3037082			GMR_18A05-x-GMR_25A11	w[1118]; P{y[+t7.7] w[+mC]=R18A05-p65.AD}attP40; P{y[+t7.7] w[+mC]=R25A11-GAL4.DBD}attP2
SS68544	Adult	Ryo Minegishi	Dickson	1	N	No	No	10.1101/2024.01.09.574419	Meissner; 2024	3037086	LBL11		GMR_16E12-x-GMR_61G12	w[1118]; P{y[+t7.7] w[+mC]=R16E12-p65.AD}attP40/CyO, P{w[+mC]=2xTb[1]-RFP}CyO; P{y[+t7.7] w[+mC]=R61G12-GAL4.DBD}attP2
SS68610	Adult	Ryo Minegishi	Dickson	2	N	No	No	10.1101/2024.01.09.574419	Meissner; 2024	3037061	LBI50		GMR_28F06-x-VT042767	w[1118]; P{y[+t7.7] w[+mC]=R28F06-p65.AD}attP40; P{y[+t7.7] w[+mC]=VT042767-GAL4.DBD}attP2
SS68719	Adult	Ryo Minegishi	Dickson	1	N	Yes	No	10.1101/2024.01.09.574419	Meissner; 2024	3040402	LUL34		VT038448-x-VT040713	w[1118]; P{y[+t7.7] w[+mC]=VT038448-p65.AD}attP40; P{y[+t7.7] w[+mC]=VT040713-GAL4.DBD}attP2
SS69011	Adult	Jens Goldammer	Rubin	1	N	No	No	10.1101/2024.01.09.574419	Meissner; 2024	3039163	PLP035, PLP038?, WED039		GMR_23G11-x-GMR_74B06	w; 23G11-p65ADZp in attP40; 74B06-ZpGDBD in attP2
SS69020	Adult	Jens Goldammer	Rubin	1	N	No	Yes	10.1101/2024.01.09.574419	Meissner; 2024	3039165	PS114 similar IB025, IB026		GMR_56A11-x-GMR_18F07	w[1118]; P{y[+t7.7] w[+mC]=R56A11-p65.AD}JK22C/CyO; P{y[+t7.7] w[+mC]=R18F07-GAL4.DBD}attP2/TM6B, Tb[1]
SS69170	Adult	Tanya Wolff	Rubin	1	N	No	Yes	10.1101/2024.01.09.574419	Meissner; 2024	3039985			GMR_16D01-x-VT017183	w[1118]; P{y[+t7.7] w[+mC]=R16D01-p65.AD}attP40; P{y[+t7.7] w[+mC]=VT017183-GAL4.DBD}attP2/TM6B, Tb[1]
SS69296	Adult	DI	DI	2	N	No	No	10.1101/2024.01.09.574419	Meissner; 2024	3038384	LT-IN (central)		VT062553-x-VT013600	w[1118]; P{y[+t7.7] w[+mC]=VT062553-p65.AD}attP40; P{y[+t7.7] w[+mC]=VT013600-GAL4.DBD}attP2
SS69506	Adult	Kaiyu Wang	Dickson	2	N	No	No	10.1101/2024.01.09.574419	Meissner; 2024	3037630	SEZ_DN		VT008474-x-VT062260	w[1118]; P{y[+t7.7] w[+mC]=VT008474-p65.AD}attP40; P{y[+t7.7] w[+mC]=VT062260-GAL4.DBD}attP2
SS69586	Adult	Ryo Minegishi	Dickson	1	N	Yes	No	10.1101/2024.01.09.574419	Meissner; 2024	3037855	SN_mixed		VT058548-x-VT065303	w[1118]; P{y[+t7.7] w[+mC]=VT058548-p65.AD}attP40; P{y[+t7.7] w[+mC]=VT065303-GAL4.DBD}attP2
SS69909	Adult	Kaiyu Wang	Dickson	1	N	No	No	10.1101/2024.01.09.574419	Meissner; 2024	3036990	pMP_LN		VT034612-x-GMR_51H05	w[1118]; P{y[+t7.7] w[+mC]=VT034612-p65.AD}attP40/CyO; P{y[+t7.7] w[+mC]=R51H05-GAL4.DBD}attP2/TM6B, Tb[+]
SS69910	Adult	Kaiyu Wang	Dickson	2	N	No	No	10.1101/2024.01.09.574419	Meissner; 2024	3036991	MBON, fAbG_LN		GMR_28F06-x-GMR_20A02	w[1118]; P{y[+t7.7] w[+mC]=R28F06-p65.AD}attP40/CyO; P{y[+t7.7] w[+mC]=R20A02-GAL4.DBD}attP2
SS69911	Adult	Kaiyu Wang	Dickson	1	Y	No	No	10.1101/2024.01.09.574419	Meissner; 2024	3036992	WN_LN_mixed		GMR_20A02-x-VT043086	w[1118]; P{y[+t7.7] w[+mC]=R20A02-p65.AD}attP40; P{y[+t7.7] w[+mC]=VT043086-GAL4.DBD}attP2
SS70425	Adult	Ryo Minegishi	Dickson	2	N	No	No	10.1101/2024.01.09.574419	Meissner; 2024	3040190			GMR_82F02-x-GMR_20F06	w[1118]; P{y[+t7.7] w[+mC]=R82F02-p65.AD}attP40; P{y[+t7.7] w[+mC]=R20F06-GAL4.DBD}attP2
SS70427	Adult	Ryo Minegishi	Dickson	2	N	No	No	10.1101/2024.01.09.574419	Meissner; 2024	3040184			GMR_82F02-x-GMR_20C09	w[1118]; P{y[+t7.7] w[+mC]=R82F02-p65.AD}attP40; P{y[+t7.7] w[+mC]=R20C09-GAL4.DBD}attP2
SS70581	Adult	DI	DI	1	N	No	No	10.1101/2024.01.09.574419	Meissner; 2024	3037866	CMN		VT042758-x-VT022098	w[1118]; P{y[+t7.7] w[+mC]=VT042758-p65.AD}attP40; P{y[+t7.7] w[+mC]=VT022098-GAL4.DBD}attP2
SS70607	Adult	DI	DI	1	N	No	No	10.1101/2024.01.09.574419	Meissner; 2024	3038378	DNa10		VT044168-x-VT050139	w[1118]; P{y[+t7.7] w[+mC]=VT044168-p65.AD}attP40; P{y[+t7.7] w[+mC]=VT050139-GAL4.DBD}attP2
SS70620	Adult	DI	DI	2	N	No	No	10.1101/2024.01.09.574419	Meissner; 2024	3037860	DNb08x2		GMR_94D12-x-VT031392	w[1118]; P{y[+t7.7] w[+mC]=R94D12-p65.AD}attP40/CyO, P{w[+mC]=2xTb[1]-RFP}CyO; P{y[+t7.7] w[+mC]=VT031392-GAL4.DBD}attP2
SS70659	Adult	DI	DI	1	N	No	No	10.1101/2024.01.09.574419	Meissner; 2024	3037884	DNg39		VT037566-x-GMR_55D12	w[1118]; P{y[+t7.7] w[+mC]=VT037566-p65.AD}attP40; P{y[+t7.7] w[+mC]=R55D12-GAL4.DBD}attP2
SS70962	Adult	Jens Goldammer	Rubin	2	N	No	No	10.1101/2024.01.09.574419	Meissner; 2024	3039295	PS083		GMR_72H06-x-GMR_50A05	w[1118]; P{y[+t7.7] w[+mC]=R72H06-p65.AD}attP40/CyO, P{w[+mC]=2xTb[1]-RFP}CyO; P{y[+t7.7] w[+mC]=R50A05-GAL4.DBD}attP2/TM6B, Tb[1]
SS70971	Adult	Jens Goldammer	Rubin	1	N	No	Yes	10.1101/2024.01.09.574419	Meissner; 2024	3039209	SIP020, SIP021, IB002		VT046782-x-GMR_41F02	w[1118]; P{y[+t7.7] w[+mC]=VT046782-p65.AD}attP40; P{y[+t7.7] w[+mC]=R41F02-GAL4.DBD}attP2/T(2;3)B3, CyO: TM6B, Tb[1]
SS70977	Adult	Jens Goldammer	Rubin	2	N	No	No	10.1101/2024.01.09.574419	Meissner; 2024	3039212	SMP387		GMR_94E06-x-GMR_49C05	w[1118]; P{y[+t7.7] w[+mC]=R94E06-p65.AD}attP40; P{y[+t7.7] w[+mC]=R49C05-GAL4.DBD}attP2
SS71277	Adult	Jens Goldammer	Rubin	1	N	No	No	10.1101/2024.01.09.574419	Meissner; 2024	3039237	PS194, (PS193 in MCFO)		VT037575-x-VT064563	w[1118]; P{y[+t7.7] w[+mC]=VT037575-p65.AD}attP40/CyO; P{y[+t7.7] w[+mC]=VT064563-GAL4.DBD}attP2/TM6B, Tb[1]
SS71285	Adult	Jens Goldammer	Rubin	2	N	No	No	10.1101/2024.01.09.574419	Meissner; 2024	3039301	PS194 (PS193 in MCFO)		VT008534-x-VT042478	w[1118]; P{y[+t7.7] w[+mC]=VT008534-p65.AD}attP40; P{y[+t7.7] w[+mC]=VT042478-GAL4.DBD}attP2
SS71290	Adult	Jens Goldammer	Rubin	1	N	No	Yes	10.1101/2024.01.09.574419	Meissner; 2024	3039243	OCG02		VT007081-x-GMR_85F12	w[1118]; P{y[+t7.7] w[+mC]=VT007081-p65.AD}attP40/CyO; P{y[+t7.7] w[+mC]=R85F12-GAL4.DBD}attP2/TM6B, Tb[1]
SS71299	Adult	Jens Goldammer	Rubin	1	N	No	Yes	10.1101/2024.01.09.574419	Meissner; 2024	3039249	OCG02		VT007081-x-GMR_74B04	w[1118]; P{y[+t7.7] w[+mC]=VT007081-p65.AD}attP40/CyO; P{y[+t7.7] w[+mC]=R74B04-GAL4.DBD}attP2/TM6B, Tb[1]
SS71326	Adult	Kaiyu Wang	Dickson	2	N	No	No	10.1101/2024.01.09.574419	Meissner; 2024	3038415	pSP, dMT		VT026771-x-VT029305	w[1118]; P{y[+t7.7] w[+mC]=VT026771-p65.AD}attP40/CyO; P{y[+t7.7] w[+mC]=VT029305-GAL4.DBD}attP2/TM6B, Tb[1]
SS71340	Adult	Kaiyu Wang	Dickson	1	N	No	Yes	10.1101/2024.01.09.574419	Meissner; 2024	3038417	mlPN(DL3?)		VT046095-x-VT057245	w[1118]; P{y[+t7.7] w[+mC]=VT046095-p65.AD}attP40/CyO; P{y[+t7.7] w[+mC]=VT057245-GAL4.DBD}attP2/TM6B, Tb[1]
SS71348	Adult	Kaiyu Wang	Dickson	1	N	No	No	10.1101/2024.01.09.574419	Meissner; 2024	3038418	SEZ_LN		VT046095-x-VT000767	w[1118]; P{y[+t7.7] w[+mC]=VT046095-p65.AD}attP40; P{y[+t7.7] w[+mC]=VT000767-GAL4.DBD}attP2
SS71373	Adult	Kaiyu Wang	Dickson	2	N	No	No	10.1101/2024.01.09.574419	Meissner; 2024	3038424	OL		GMR_24C08-x-VT058925	w[1118]; P{y[+t7.7] w[+mC]=R24C08-p65.AD}attP40; P{y[+t7.7] w[+mC]=VT058925-GAL4.DBD}attP2
SS72084	Adult	DI	DI	1	N	No	No	10.1101/2024.01.09.574419	Meissner; 2024	3038468	DNg95		VT011132-x-GMR_28H03	w[1118]; P{y[+t7.7] w[+mC]=VT011132-p65.AD}attP40; P{y[+t7.7] w[+mC]=R28H03-GAL4.DBD}attP2
SS72104	Adult	DI	DI	1	N	No	No	10.1101/2024.01.09.574419	Meissner; 2024	3038391	New DNg		VT044326-x-GMR_66B05	w[1118]; P{y[+t7.7] w[+mC]=VT044326-p65.AD}attP40; P{y[+t7.7] w[+mC]=R66B05-GAL4.DBD}attP2
SS72201	Adult	DI	DI	1	N	No	No	10.1101/2024.01.09.574419	Meissner; 2024	3038376	Haltere Afferent		GMR_45H03-x-VT017239	w[1118]; P{y[+t7.7] w[+mC]=R45H03-p65.AD}attP40; P{y[+t7.7] w[+mC]=VT017239-GAL4.DBD}attP2
SS72203	Adult	DI	DI	1	N	No	No	10.1101/2024.01.09.574419	Meissner; 2024	3038467	Haltere Afferent		GMR_45H03-x-GMR_16G01	w[1118]; P{y[+t7.7] w[+mC]=R45H03-p65.AD}attP40; P{y[+t7.7] w[+mC]=R16G01-GAL4.DBD}attP2
SS72207	Adult	DI	DI	1	0	No	No	10.1101/2024.01.09.574419	Meissner; 2024	3038381	DNg34		GMR_46A02-x-VT019841	w[1118]; P{y[+t7.7] w[+mC]=R46A02-p65.AD}attP40; P{y[+t7.7] w[+mC]=VT019841-GAL4.DBD}attP2
SS72272	Adult	Jens Goldammer	Rubin	1	N	No	Yes	10.1101/2024.01.09.574419	Meissner; 2024	3039255	WEDPN3		GMR_22D12-x-VT002216	w[1118]; P{y[+t7.7] w[+mC]=R22D12-p65.AD}attP40/CyO; P{y[+t7.7] w[+mC]=VT002216-GAL4.DBD}attP2/TM6B, Tb[1]
SS72288	Adult	Jens Goldammer	Rubin	2	N	No	No	10.1101/2024.01.09.574419	Meissner; 2024	3039262	PLP015, PLP023		GMR_22D12-x-VT058382	w[1118]; P{y[+t7.7] w[+mC]=R22D12-p65.AD}attP40/CyO; P{y[+t7.7] w[+mC]=VT058382-GAL4.DBD}attP2/TM6B, Tb[1]
SS72289	Adult	Jens Goldammer	Rubin	1	N	No	No	10.1101/2024.01.09.574419	Meissner; 2024	3039263	PS140		VT041032-x-GMR_9C11	w[1118]; P{y[+t7.7] w[+mC]=VT041032-p65.AD}JK22C/CyO; P{y[+t7.7] w[+mC]=R9C11-GAL4.DBD}attP2/TM6B, Tb[1]
SS72874	Adult	Jens Goldammer	Rubin	1	N	No	No	10.1101/2024.01.09.574419	Meissner; 2024	3039266	SMP437, SMP438?, CL167?		VT007746-x-VT025602	w[1118]; P{y[+t7.7] w[+mC]=VT007746-p65.AD}attP40; P{y[+t7.7] w[+mC]=VT025602-GAL4.DBD}attP2
SS72883	Adult	Jens Goldammer	Rubin	2	N	No	No	10.1101/2024.01.09.574419	Meissner; 2024	3039270	IB009, similar IB010		GMR_58E07-x-GMR_89A03	w[1118]; P{y[+t7.7] w[+mC]=R58E07-p65.AD}attP40/CyO; P{y[+t7.7] w[+mC]=R89A03-GAL4.DBD}attP2/TM6B, Tb[1]
SS72989	Adult	DI	DI	1	N	No	No	10.1101/2024.01.09.574419	Meissner; 2024	3039765	DNp14		VT006204-x-VT002329	w[1118]; P{y[+t7.7] w[+mC]=VT006204-p65.AD}attP40/CyO, P{w[+mC]=2xTb[1]-RFP}CyO; P{y[+t7.7] w[+mC]=VT002329-GAL4.DBD}attP2/TM6B, Tb[1]
SS73035	Adult	DI	DI	2	N	No	No	10.1101/2024.01.09.574419	Meissner; 2024	3039771	DNg37, check		VT043662-x-GMR_48H02	w[1118]; P{y[+t7.7] w[+mC]=VT043662-p65.AD}attP40; P{y[+t7.7] w[+mC]=R48H02-GAL4.DBD}attP2
SS73369	Adult	Jens Goldammer	Rubin	2	Y	No	No	10.1101/2024.01.09.574419	Meissner; 2024	3039503	LAL082, LAL098		VT048572-x-GMR_16F06	w[1118]; P{y[+t7.7] w[+mC]=VT048572-p65.AD}attP40/CyO; P{y[+t7.7] w[+mC]=R16F06-GAL4.DBD}attP2/TM6B, Tb[1]
SS73377	Adult	Jens Goldammer	Rubin	1	N	No	Yes	10.1101/2024.01.09.574419	Meissner; 2024	3039576	SMP055		GMR_17A04-x-VT034811	w[1118]; P{y[+t7.7] w[+mC]=R17A04-p65.AD}attP40; P{y[+t7.7] w[+mC]=VT034811-GAL4.DBD}attP2
SS73384	Adult	Jens Goldammer	Rubin	1	N	No	Yes	10.1101/2024.01.09.574419	Meissner; 2024	3039579	CL249?, VES053, SMP473		VT041421-x-VT044958	w[1118]; P{y[+t7.7] w[+mC]=VT041421-p65.AD}attP40; P{y[+t7.7] w[+mC]=VT044958-GAL4.DBD}attP2/TM6B, Tb[1]
SS73388	Adult	Jens Goldammer	Rubin	2	N	No	No	10.1101/2024.01.09.574419	Meissner; 2024	3039517		1253230158, 1407053514	GMR_58H05-x-VT045565	w[1118]; P{y[+t7.7] w[+mC]=R58H05-p65.AD}JK22C/CyO; P{y[+t7.7] w[+mC]=VT045565-GAL4.DBD}attP2/TM6B, Tb[1]
SS73430	Adult	DI	DI	1	N	No	No	10.1101/2024.01.09.574419	Meissner; 2024	3039774	DNx01		GMR_92C07-x-GMR_55H04	w[1118]; P{y[+t7.7] w[+mC]=R92C07-p65.AD}attP40; P{y[+t7.7] w[+mC]=R55H04-GAL4.DBD}attP2
SS73441	Adult	DI	DI	1	N	No	No	10.1101/2024.01.09.574419	Meissner; 2024	3040882	DNd01		GMR_27F02-x-GMR_76F12	w[1118]; P{y[+t7.7] w[+mC]=R27F02-p65.AD}attP40; P{y[+t7.7] w[+mC]=R76F12-GAL4.DBD}attP2
SS73654	Adult	Jens Goldammer	Rubin	1	N	No	Yes	10.1101/2024.01.09.574419	Meissner; 2024	3039548		1934975261, 1882040130	VT037865-x-VT018764	w[1118]; P{y[+t7.7] w[+mC]=VT037865-p65.AD}attP40/CyO; P{y[+t7.7] w[+mC]=VT018764-GAL4.DBD}attP2/TM6B, Tb[1]
SS73660	Adult	Jens Goldammer	Rubin	1	N	No	No	10.1101/2024.01.09.574419	Meissner; 2024	3039553	PLP015, PLP022, WEDPN2B?		VT058382-x-VT002216	w[1118]; P{y[+t7.7] w[+mC]=VT058382-p65.AD}attP40/CyO; P{y[+t7.7] w[+mC]=VT002216-GAL4.DBD}attP2/TM6B, Tb[1]
SS74390	Adult	DI	DI	2	N	No	No	10.1101/2024.01.09.574419	Meissner; 2024	3039963	DNg04x3		VT037825-x-VT047747	w[1118]; P{y[+t7.7] w[+mC]=VT037825-p65.AD}attP40; P{y[+t7.7] w[+mC]=VT047747-GAL4.DBD}attP2
SS74396	Adult	DI	DI	1	N	No	No	10.1101/2024.01.09.574419	Meissner; 2024	3039970	DNp14		VT006204-x-GMR_10C06	w[1118]; P{y[+t7.7] w[+mC]=VT006204-p65.AD}attP40; P{y[+t7.7] w[+mC]=R10C06-GAL4.DBD}attP2
SS74442	Adult	DI	DI	1	N	No	No	10.1101/2024.01.09.574419	Meissner; 2024	3039981	DN22		GMR_27E07-x-GMR_16E11	w[1118]; P{y[+t7.7] w[+mC]=R27E07-p65.AD}attP40; P{y[+t7.7] w[+mC]=R16E11-GAL4.DBD}attP2
SS74458	Adult	DI	DI	1	N	No	No	10.1101/2024.01.09.574419	Meissner; 2024	3039958	New DNg check		GMR_47D05-x-VT026537	w[1118]; P{y[+t7.7] w[+mC]=R47D05-p65.AD}attP40; P{y[+t7.7] w[+mC]=VT026537-GAL4.DBD}attP2/TM6B, Tb[1]
SS74475	Adult	DI	DI	2	N	No	No	10.1101/2024.01.09.574419	Meissner; 2024	3039954	DNb04		GMR_59B10-x-VT043145	w[1118]; P{y[+t7.7] w[+mC]=R59B10-p65.AD}attP40; P{y[+t7.7] w[+mC]=VT043145-GAL4.DBD}attP2
SS74639	Adult	Ryo Minegishi	Dickson	1	N	Yes	No	10.1101/2024.01.09.574419	Meissner; 2024	3042510	LUL10		GMR_23E11-x-VT046776	w[1118]; P{y[+t7.7] w[+mC]=R23E11-p65.AD}attP40/CyO, P{w[+mC]=2xTb[1]-RFP}CyO; P{y[+t7.7] w[+mC]=VT046776-GAL4.DBD}attP2
SS74667	Adult	Ryo Minegishi	Dickson	2	N	No	No	10.1101/2024.01.09.574419	Meissner; 2024	3043505			GMR_13E04-x-GMR_51C07	w[1118]; P{y[+t7.7] w[+mC]=R13E04-p65.AD}attP40; P{y[+t7.7] w[+mC]=R51C07-GAL4.DBD}attP2
SS74713	Adult	Ryo Minegishi	Dickson	2	N	No	No	10.1101/2024.01.09.574419	Meissner; 2024	3043419	LUL10		GMR_52H09-x-VT046776	w[1118]; P{y[+t7.7] w[+mC]=R52H09-p65.AD}attP40/CyO, P{w[+mC]=2xTb[1]-RFP}CyO; P{y[+t7.7] w[+mC]=VT046776-GAL4.DBD}attP2
SS74741	Adult	Kaiyu Wang	Dickson	1	N	No	No	10.1101/2024.01.09.574419	Meissner; 2024	3040581	WN_LN_mixed		VT043702-x-GMR_21B02	w[1118]; P{y[+t7.7] w[+mC]=VT043702-p65.AD}attP40/CyO, P{w[+mC]=2xTb[1]-RFP}CyO; P{y[+t7.7] w[+mC]=R21B02-GAL4.DBD}attP2/TM6B, Tb[1]
SS74831	Adult	Aljoscha Nern	Rubin	1	N	No	Yes	10.1101/2024.01.09.574419	Meissner; 2024	3043854	SLP078 or similar		VT034258-x-VT050384	w[1118]; P{y[+t7.7] w[+mC]=VT034258-p65.AD}attP40; P{y[+t7.7] w[+mC]=VT050384-GAL4.DBD}attP2
SS74884	Adult	Aljoscha Nern	Rubin	1	N	No	No	10.1101/2024.01.09.574419	Meissner; 2024	NA	SMP367		VT008474-x-VT046808	w; VT008474-p65ADZp in attP40; VT046808-ZpGdbd in attP2
SS74917	Adult	Aljoscha Nern	Rubin	1	N	No	No	10.1101/2024.01.09.574419	Meissner; 2024	NA	SMP367		VT046049-x-VT014708	w; VT046049-p65ADZp in attP40; VT014708-ZpGdbd in attP2
SS74930	Adult	Aljoscha Nern	Rubin	1	N	No	Yes	10.1101/2024.01.09.574419	Meissner; 2024	3043427	SLP TBD		VT014958-x-VT058557	w[1118]; P{y[+t7.7] w[+mC]=VT014958-p65.AD}attP40; P{y[+t7.7] w[+mC]=VT058557-GAL4.DBD}attP2
SS75456	Adult	Aljoscha Nern	Rubin	1	N	No	No	10.1101/2024.01.09.574419	Meissner; 2024	3043432	SMP85 and/or similar		VT008655-x-VT062645	w[1118]; P{y[+t7.7] w[+mC]=VT008655-p65.AD}attP40/CyO, P{w[+mC]=2xTb[1]-RFP}CyO; P{y[+t7.7] w[+mC]=VT062645-GAL4.DBD}attP2/TM6B, Tb[1]
SS75751	Adult	Aljoscha Nern	Rubin	1	N	No	No	10.1101/2024.01.09.574419	Meissner; 2024	3043372	PLP052		VT064581-x-VT028144	w[1118]; P{y[+t7.7] w[+mC]=VT064581-p65.AD}attP40; P{y[+t7.7] w[+mC]=VT028144-GAL4.DBD}attP2
SS76311	Adult	Gerry Rubin	Rubin	1	N	No	Yes	10.1101/2024.01.09.574419	Meissner; 2024	3040868	CRE039	613083317, 644148539, 644153089, 739572008, 894551935, 5813054079, 5813054659, 5813123042	VT043672-x-VT045575	w[1118]; P{y[+t7.7] w[+mC]=VT043672-p65.AD}attP40; P{y[+t7.7] w[+mC]=VT045575-GAL4.DBD}attP2
SS76489	Adult	Aljoscha Nern	Rubin	1	N	No	Yes	10.1101/2024.01.09.574419	Meissner; 2024	NA	SLP316		GMR_38E08-x-GMR_36B07	w; 38E08-p65ADZp in attP40; 36B07-ZpGdbd in attP2
SS76588	Adult	Aljoscha Nern	Rubin	1	N	No	Yes	10.1101/2024.01.09.574419	Meissner; 2024	3043331	PLP230		VT007337-x-VT063983	w[1118]; P{y[+t7.7] w[+mC]=VT007337-p65.AD}attP40/CyO, P{w[+mC]=2xTb[1]-RFP}CyO; P{y[+t7.7] w[+mC]=VT063983-GAL4.DBD}attP2/TM6B, Tb[1]
SS76692	Adult	Ryo Minegishi	Dickson	2	N	No	No	10.1101/2024.01.09.574419	Meissner; 2024	3043349			GMR_52H01-x-VT034804	w[1118]; P{y[+t7.7] w[+mC]=R52H01-p65.AD}attP40; P{y[+t7.7] w[+mC]=VT034804-GAL4.DBD}attP2
SS77191	Adult	Gerry Rubin	Rubin	2	N	No	No	10.1101/2024.01.09.574419	Meissner; 2024	3041656	SMP081 (likely)		GMR_24H08-x-GMR_22C12	w[1118]; P{y[+t7.7] w[+mC]=R22C12-GAL4.DBD}attP2 PBac{y[+mDint2] w[+mC]=R24H08-p65.AD}VK00027
SS77498	Adult	Gerry Rubin	Rubin	1	N	No	No	10.1101/2024.01.09.574419	Meissner; 2024	3040506			GMR_32A04-x-VT061221	w[1118]; P{y[+t7.7] w[+mC]=R32A04-p65.AD}attP40; P{y[+t7.7] w[+mC]=VT061221-GAL4.DBD}attP2
SS77940	Adult	Aljoscha Nern	Rubin	1	N	No	No	10.1101/2024.01.09.574419	Meissner; 2024	3043347	SLP364		VT019906-x-VT023830	w[1118]; P{y[+t7.7] w[+mC]=VT019906-p65.AD}attP40; P{y[+t7.7] w[+mC]=VT023830-GAL4.DBD}attP2/TM6B, Tb[1]
SS77971	Adult	Aljoscha Nern	Rubin	1	N	No	No	10.1101/2024.01.09.574419	Meissner; 2024	3043539	SMP402		VT061921-x-VT046049	w[1118]; P{y[+t7.7] w[+mC]=VT061921-p65.AD}attP40; P{y[+t7.7] w[+mC]=VT046049-GAL4.DBD}attP2
SS78219	Adult	Aljoscha Nern	Rubin	1	N	No	No	10.1101/2024.01.09.574419	Meissner; 2024	3043540	AstA1		GMR_65D05-x-GMR_22C10	w[1118]; P{y[+t7.7] w[+mC]=VT044841-p65.AD}attP40; P{y[+t7.7] w[+mC]=R65E11-GAL4.DBD}attP2/TM6B, Tb[1]
SS78380	Adult	Ryo Minegishi	Dickson	1	N	No	No	10.1101/2024.01.09.574419	Meissner; 2024	3042213			GMR_10D10-x-VT039961	w[1118]; P{y[+t7.7] w[+mC]=R10D10-p65.AD}attP40; P{y[+t7.7] w[+mC]=VT039961-GAL4.DBD}attP2/TM6B, Tb[1]
SS78420	Adult	Ryo Minegishi	Dickson	2	N	No	No	10.1101/2024.01.09.574419	Meissner; 2024	3043935	LBI9		GMR_46D01-x-GMR_42B02	w[1118]; P{y[+t7.7] w[+mC]=R46D01-p65.AD}attP40/CyO, P{2xTb[1]-RFP}CyO; P{y[+t7.7] w[+mC]=R42B02-GAL4.DBD}attP2/TM6B, Tb[1]
SS78430	Adult	Ryo Minegishi	Dickson	1	N	Yes	No	10.1101/2024.01.09.574419	Meissner; 2024	3042843	LBI23		GMR_59F08-x-GMR_56E09	w[1118]; P{y[+t7.7] w[+mC]=R59F08-p65.AD}attP40; P{y[+t7.7] w[+mC]=R56E09-GAL4.DBD}attP2/TM6B, Tb[1]
SS78556	Adult	Gerry Rubin	Rubin	1	N	No	Yes	10.1101/2024.01.09.574419	Meissner; 2024	3040768			GMR_30H09-x-GMR_84B09	w[1118]; P{y[+t7.7] w[+mC]=R30H09-p65.AD}attP40; P{y[+t7.7] w[+mC]=R84B09-GAL4.DBD}attP2
SS79053	Adult	Tanya Wolff	Rubin	1	N	No	No	10.1101/2024.01.09.574419	Meissner; 2024	3043619			GMR_46E03-x-VT063191	w[1118]; P{y[+t7.7] w[+mC]=R46E03-p65.AD}attP40; P{y[+t7.7] w[+mC]=VT063191-GAL4.DBD}attP2
SS79124	Adult	Aljoscha Nern	Rubin	1	N	No	No	10.1101/2024.01.09.574419	Meissner; 2024	3043869	SLP459		GMR_20F06-x-VT018689	w[1118]; P{y[+t7.7] w[+mC]=R20F06-p65.AD}attP40; P{y[+t7.7] w[+mC]=VT018689-GAL4.DBD}attP2
SS79251	Adult	Ryo Minegishi	Dickson	2	N	No	No	10.1101/2024.01.09.574419	Meissner; 2024	3043847	LUL164		GMR_52B07-x-VT008650	w[1118]; P{y[+t7.7] w[+mC]=R52B07-p65.AD}attP40; P{y[+t7.7] w[+mC]=VT008650-GAL4.DBD}attP2
SS79279	Adult	Ryo Minegishi	Dickson	2	N	No	No	10.1101/2024.01.09.574419	Meissner; 2024	3042237			VT008469-x-VT017683	w[1118]; P{y[+t7.7] w[+mC]=VT008469-p65.AD}attP40; P{y[+t7.7] w[+mC]=VT017683-GAL4.DBD}attP2
SS79321	Adult	Ryo Minegishi	Dickson	1	N	Yes	No	10.1101/2024.01.09.574419	Meissner; 2024	3043647	LUL84		GMR_80G10-x-GMR_89B12	w[1118]; P{y[+t7.7] w[+mC]=R80G10-p65.AD}attP40; P{y[+t7.7] w[+mC]=R89B12-GAL4.DBD}attP2
SS79361	Adult	Ryo Minegishi	Dickson	1	N	Yes	No	10.1101/2024.01.09.574419	Meissner; 2024	3042767	LUI3		VT058427-x-GMR_24H08	w[1118]; P{y[+t7.7] w[+mC]=VT058427-p65.AD}attP40; P{y[+t7.7] w[+mC]=R24H08-GAL4.DBD}attP2
SS79392	Adult	Ryo Minegishi	Dickson	2	N	No	No	10.1101/2024.01.09.574419	Meissner; 2024	3042529			GMR_75H10-x-GMR_24E05	w[1118]; P{y[+t7.7] w[+mC]=R75H10-p65.AD}attP40; P{y[+t7.7] w[+mC]=R24E05-GAL4.DBD}attP2/TM6B, Tb[1]
SS79449	Adult	Ryo Minegishi	Dickson	1	N	Yes	No	10.1101/2024.01.09.574419	Meissner; 2024	3042310			GMR_49E07-x-GMR_26B07	w[1118]; P{y[+t7.7] w[+mC]=R49E07-p65.AD}attP40; P{y[+t7.7] w[+mC]=R26B07-GAL4.DBD}attP2
SS79454	Adult	Ryo Minegishi	Dickson	2	N	No	No	10.1101/2024.01.09.574419	Meissner; 2024	3043501			GMR_17A10-x-GMR_31A11	w[1118]; P{y[+t7.7] w[+mC]=R17A10-p65.AD}attP40; P{y[+t7.7] w[+mC]=R31A11-GAL4.DBD}attP2
SS79461	Adult	Ryo Minegishi	Dickson	3	N	No	No	10.1101/2024.01.09.574419	Meissner; 2024	3043981			GMR_20G06-x-GMR_22G11	w[1118]; P{y[+t7.7] w[+mC]=R20G06-p65.AD}attP40/CyO, P{w[+mC]=2xTb[1]-RFP}CyO; P{y[+t7.7] w[+mC]=R22G11-GAL4.DBD}attP2
SS79481	Adult	Ryo Minegishi	Dickson	2	N	No	No	10.1101/2024.01.09.574419	Meissner; 2024	3043509			VT037553-x-GMR_91A11	w[1118]; P{y[+t7.7] w[+mC]=VT037553-p65.AD}attP40/CyO, P{w[+mC]=2xTb[1]-RFP}CyO; P{y[+t7.7] w[+mC]=R91A11-GAL4.DBD}attP2
SS79515	Adult	Ryo Minegishi	Dickson	2	N	No	No	10.1101/2024.01.09.574419	Meissner; 2024	3042846			GMR_33G04-x-GMR_21D04	w[1118]; P{y[+t7.7] w[+mC]=R33G04-p65.AD}attP40; P{y[+t7.7] w[+mC]=R21D04-GAL4.DBD}attP2
SS79521	Adult	Gerry Rubin	Rubin	1	N	No	No	10.1101/2024.01.09.574419	Meissner; 2024	3040753	SIP020		VT046782-x-VT000772	w[1118]; P{y[+t7.7] w[+mC]=VT046782-p65.AD}attP40; P{y[+t7.7] w[+mC]=VT000772-GAL4.DBD}attP2/TM6B, Tb[1]
SS79551	Adult	Gerry Rubin	Rubin	1	N	No	No	10.1101/2024.01.09.574419	Meissner; 2024	3040794	unknown ascending neuron		GMR_22H01-x-VT027175	w[1118]; P{y[+t7.7] w[+mC]=R22H01-p65.AD}attP40; P{y[+t7.7] w[+mC]=VT027175-GAL4.DBD}attP2
SS79598	Adult	Gerry Rubin	Rubin	1	N	No	Yes	10.1101/2024.01.09.574419	Meissner; 2024	3041423	AVLP015		VT049480-x-GMR_49D11	w[1118]; P{y[+t7.7] w[+mC]=VT049480-p65.AD}attP40/CyO, P{w[+mC]=2xTb[1]-RFP}CyO; P{y[+t7.7] w[+mC]=R49D11-GAL4.DBD}attP2
SS80021	Adult	Ryo Minegishi	Dickson	1	N	No	No	10.1101/2024.01.09.574419	Meissner; 2024	3043843	LUI2, LUI17		GMR_28H03-x-VT045281	w[1118]; P{y[+t7.7] w[+mC]=R28H03-p65.AD}JK22C; P{y[+t7.7] w[+mC]=VT045281-GAL4.DBD}attP2
SS80088	Adult	Ryo Minegishi	Dickson	1	N	No	No	10.1101/2024.01.09.574419	Meissner; 2024	3042757	LUL163		GMR_23E04-x-GMR_59H05	w[1118]; P{y[+t7.7] w[+mC]=R23E04-p65.AD}JK22C; P{y[+t7.7] w[+mC]=R59H05-GAL4.DBD}attP2/TM6B, Tb[1]
SS80089	Adult	Ryo Minegishi	Dickson	2	N	No	No	10.1101/2024.01.09.574419	Meissner; 2024	3042756	LUL87		GMR_18C11-x-GMR_59H05	w[1118]; P{y[+t7.7] w[+mC]=R18C11-p65.AD}attP40/CyO, P{w[+mC]=2xTb[1]-RFP}CyO; P{y[+t7.7] w[+mC]=R59H05-GAL4.DBD}attP2/TM6B, Tb[1]
SS80093	Adult	Ryo Minegishi	Dickson	2	N	No	No	10.1101/2024.01.09.574419	Meissner; 2024	3042758	LUL42		GMR_20G06-x-GMR_94E11	w[1118]; P{y[+t7.7] w[+mC]=R20G06-p65.AD}attP40/CyO, P{w[+mC]=2xTb[1]-RFP}CyO; P{y[+t7.7] w[+mC]=R94E11-GAL4.DBD}attP2/TM6B, Tb[1]
SS80180	Adult	Ryo Minegishi	Dickson	3	N	No	No	10.1101/2024.01.09.574419	Meissner; 2024	3043668			GMR_94E10-x-GMR_15G08	w[1118]; P{y[+t7.7] w[+mC]=R94E10-p65.AD}attP40; P{y[+t7.7] w[+mC]=R15G08-GAL4.DBD}attP2
SS80251	Adult	Ryo Minegishi	Dickson	1	N	No	No	10.1101/2024.01.09.574419	Meissner; 2024	3042387	LUI2, LUI17		GMR_54H04-x-GMR_28H03	w[1118]; P{y[+t7.7] w[+mC]=R54H04-p65.AD}attP40; P{y[+t7.7] w[+mC]=R28H03-GAL4.DBD}attP2/TM6B, Tb[1]
SS80260	Adult	Ryo Minegishi	Dickson	1	N	No	No	10.1101/2024.01.09.574419	Meissner; 2024	3042781	LUL147		GMR_11C07-x-GMR_22F05	w[1118]; P{y[+t7.7] w[+mC]=R11C07-p65.AD}attP40; P{y[+t7.7] w[+mC]=R22F05-GAL4.DBD}attP2
SS80292	Adult	Ryo Minegishi	Dickson	2	N	No	No	10.1101/2024.01.09.574419	Meissner; 2024	3043710	LBI18		GMR_19F09-x-GMR_30E09	w[1118]; P{y[+t7.7] w[+mC]=R19F09-p65.AD}JK22C; P{y[+t7.7] w[+mC]=R30E09-GAL4.DBD}attP2
SS80314	Adult	Aljoscha Nern	Rubin	2	N	No	No	10.1101/2024.01.09.574419	Meissner; 2024	3043825		850363295	GMR_22D03-x-VT026004	w[1118]; P{y[+t7.7] w[+mC]=R22D03-p65.AD}attP40; P{y[+t7.7] w[+mC]=VT026004-GAL4.DBD}attP2
SS80756	Adult	Gerry Rubin	Rubin	1	N	No	No	10.1101/2024.01.09.574419	Meissner; 2024	3040782	LAL		GMR_92E10-x-GMR_21E02	w[1118]; P{y[+t7.7] w[+mC]=R21E02-GAL4.DBD}attP2 PBac{y[+mDint2] w[+mC]=R92E10-p65.AD}VK00027
SS80845	Adult	Kaiyu Wang	Dickson	1	N	No	No	10.1101/2024.01.09.574419	Meissner; 2024	3040583	WN_LN_mixed		GMR_25H12-x-GMR_20G10	w[1118]; P{y[+t7.7] w[+mC]=R25H12-p65.AD}attP40; P{y[+t7.7] w[+mC]=R20G10-GAL4.DBD}attP2/TM6B, Tb[1]
SS80846	Adult	Kaiyu Wang	Dickson	1	N	No	No	10.1101/2024.01.09.574419	Meissner; 2024	3040584	WN_LN_mixed		VT015830-x-GMR_20G10	w[1118]; P{y[+t7.7] w[+mC]=VT015830-p65.AD}attP40/CyO; P{y[+t7.7] w[+mC]=R20G10-GAL4.DBD}attP2/TM6B, Tb[1]
[truncated: 2,671 more rows]
