# Supplementary material for: A split-GAL4 driver line resource for Drosophila neuron types
Source: bioRxiv preprint, doi:10.1101/2024.01.09.574419, version 4 (2024-10-29)
Supplement: Figure 1 - Supplemental File 3 [file 574419_file04.xlsx]

## Sheet: Sheet 1
Publishing Name	Slide Code	Age	Creation Date	Cross Barcode	Data Set	Effector	Fly Core Lab Id	Fly Core Landing Site	GUID	Gender	Lab	Lab Member	Line	Name	Organism	Published Objectives	Genotype
LH2454	20191218_45_G3	A01	Wed Jan 22 17:50:50 EST 2020	205448	asoy_ss_screen_review	UAS_Chrimson_Venus_X_0070	Aso		Sample#2759992335575023714	f			GMR_MB583B	GMR_MB583B-20191218_45_G3	Drosophila melanogaster	20x	w; TH-p65ADZp in attP40; 42H01-ZpGdbd in attP2
LH2454	20191218_46_G3	A01	Wed Jan 22 18:15:37 EST 2020	205448	asoy_ss_screen_review	UAS_Chrimson_Venus_X_0070	Aso		Sample#2759998568524677218	m			GMR_MB583B	GMR_MB583B-20191218_46_G3	Drosophila melanogaster	20x	w; TH-p65ADZp in attP40; 42H01-ZpGdbd in attP2
MB005B	20191011_45_A4	A01	Tue Oct 29 14:30:42 EDT 2019	201000	asoy_ss_screen_review	UAS_Chrimson_Venus_X_0070	Rubin		Sample#2729123898212745314	m			GMR_MB005B	GMR_MB005B-20191011_45_A4	Drosophila melanogaster	20x	w; 13F02-p65ADZp in attP40/CyO; 34A03-ZpGdbd in attP2
MB005B	20191011_46_A4	A01	Wed Oct 30 17:57:10 EDT 2019	201000	asoy_ss_screen_review	UAS_Chrimson_Venus_X_0070	Rubin		Sample#2729538247716765794	f			GMR_MB005B	GMR_MB005B-20191011_46_A4	Drosophila melanogaster	20x	w; 13F02-p65ADZp in attP40/CyO; 34A03-ZpGdbd in attP2
MB008B	20191011_45_A5	A01	Tue Oct 29 14:30:42 EDT 2019	201001	asoy_ss_screen_review	UAS_Chrimson_Venus_X_0070	Rubin		Sample#2729123898372128866	m			GMR_MB008B	GMR_MB008B-20191011_45_A5	Drosophila melanogaster	20x	w; 13F02-p65ADZp in attP40/CyO; 44E04-ZpGdbd in attP2/TM6B
MB008B	20191011_46_A5	A01	Wed Oct 30 17:57:10 EDT 2019	201001	asoy_ss_screen_review	UAS_Chrimson_Venus_X_0070	Rubin		Sample#2729538247863566434	f			GMR_MB008B	GMR_MB008B-20191011_46_A5	Drosophila melanogaster	20x	w; 13F02-p65ADZp in attP40/CyO; 44E04-ZpGdbd in attP2/TM6B
MB009B	20191011_45_A6	A01	Tue Oct 29 14:30:42 EDT 2019	201002	asoy_ss_screen_review	UAS_Chrimson_Venus_X_0070	Rubin		Sample#2729123898518929506	m			GMR_MB009B	GMR_MB009B-20191011_45_A6	Drosophila melanogaster	20x	w; 13F02-p65ADZp in attP40/CyO; 45H04-ZpGdbd in attP2
MB009B	20191011_46_A6	A01	Wed Oct 30 17:57:10 EDT 2019	201002	asoy_ss_screen_review	UAS_Chrimson_Venus_X_0070	Rubin		Sample#2729538248006172770	f			GMR_MB009B	GMR_MB009B-20191011_46_A6	Drosophila melanogaster	20x	w; 13F02-p65ADZp in attP40/CyO; 45H04-ZpGdbd in attP2
MB010B	20191011_45_B1	A01	Tue Oct 29 14:30:42 EDT 2019	201003	asoy_ss_screen_review	UAS_Chrimson_Venus_X_0070	Rubin		Sample#2729123898674118754	m			GMR_MB010B	GMR_MB010B-20191011_45_B1	Drosophila melanogaster	20x	w; 13F02-p65ADZp in attP40/CyO; 52H09-ZpGdbd in attP2
MB010B	20191011_46_B1	A01	Wed Oct 30 17:57:10 EDT 2019	201003	asoy_ss_screen_review	UAS_Chrimson_Venus_X_0070	Rubin		Sample#2729538248152973410	f			GMR_MB010B	GMR_MB010B-20191011_46_B1	Drosophila melanogaster	20x	w; 13F02-p65ADZp in attP40/CyO; 52H09-ZpGdbd in attP2
MB011B	20191011_45_B2	A01	Tue Oct 29 14:30:42 EDT 2019	201004	asoy_ss_screen_review	UAS_Chrimson_Venus_X_0070	Rubin		Sample#2729123898833502306	m			GMR_MB011B	GMR_MB011B-20191011_45_B2	Drosophila melanogaster	20x	w; 14C08-p65ADZp in attP40/CyO; 15B01-ZpGdbd in attP2/TM6B
MB011B	20191011_46_B2	A01	Wed Oct 30 17:57:10 EDT 2019	201004	asoy_ss_screen_review	UAS_Chrimson_Venus_X_0070	Rubin		Sample#2729538248299774050	f			GMR_MB011B	GMR_MB011B-20191011_46_B2	Drosophila melanogaster	20x	w; 14C08-p65ADZp in attP40/CyO; 15B01-ZpGdbd in attP2/TM6B
MB013B	20191011_45_B3	A01	Tue Oct 29 14:30:42 EDT 2019	201005	asoy_ss_screen_review	UAS_Chrimson_Venus_X_0070	Rubin		Sample#2729123898980302946	m			GMR_MB013B	GMR_MB013B-20191011_45_B3	Drosophila melanogaster	20x	w; 14F05-p65ADZp in attP40; 14B03-ZpGdbd in attP2
MB013B	20191011_46_B3	A01	Wed Oct 30 17:57:10 EDT 2019	201005	asoy_ss_screen_review	UAS_Chrimson_Venus_X_0070	Rubin		Sample#2729538248442380386	f			GMR_MB013B	GMR_MB013B-20191011_46_B3	Drosophila melanogaster	20x	w; 14F05-p65ADZp in attP40; 14B03-ZpGdbd in attP2
MB018B	20191011_45_B4	A01	Tue Oct 29 14:30:42 EDT 2019	201006	asoy_ss_screen_review	UAS_Chrimson_Venus_X_0070	Rubin		Sample#2729123899122909282	m			GMR_MB018B	GMR_MB018B-20191011_45_B4	Drosophila melanogaster	20x	w; 20G03-p65ADZp in attP40/CyO; 19F09-ZpGdbd in attP2
MB018B	20191011_46_B4	A01	Wed Oct 30 17:57:10 EDT 2019	201006	asoy_ss_screen_review	UAS_Chrimson_Venus_X_0070	Rubin		Sample#2729538248589181026	f			GMR_MB018B	GMR_MB018B-20191011_46_B4	Drosophila melanogaster	20x	w; 20G03-p65ADZp in attP40/CyO; 19F09-ZpGdbd in attP2
MB022B	20191011_45_A1	A01	Tue Oct 29 14:30:41 EDT 2019	200997	asoy_ss_screen_review	UAS_Chrimson_Venus_X_0070	Rubin		Sample#2729123897755566178	m			GMR_MB022B	GMR_MB022B-20191011_45_A1	Drosophila melanogaster	20x	w; 24E06-p65ADZp in attP40; TDC2-ZpGdbd in attP2/TM6B
MB022B	20191011_46_A1	A01	Wed Oct 30 17:57:10 EDT 2019	200997	asoy_ss_screen_review	UAS_Chrimson_Venus_X_0070	Rubin		Sample#2729538247255392354	f			GMR_MB022B	GMR_MB022B-20191011_46_A1	Drosophila melanogaster	20x	w; 24E06-p65ADZp in attP40; TDC2-ZpGdbd in attP2/TM6B
MB025B	20191011_45_B5	A01	Tue Oct 29 14:30:42 EDT 2019	201007	asoy_ss_screen_review	UAS_Chrimson_Venus_X_0070	Rubin		Sample#2729123899269709922	m			GMR_MB025B	GMR_MB025B-20191011_45_B5	Drosophila melanogaster	20x	w; 24E12-p65ADZp in attP40; 52H01-ZpGdbd in attP2/TM6B
MB025B	20191011_46_B6	A01	Wed Oct 30 17:57:10 EDT 2019	201007	asoy_ss_screen_review	UAS_Chrimson_Venus_X_0070	Rubin		Sample#2729538248878588002	f			GMR_MB025B	GMR_MB025B-20191011_46_B6	Drosophila melanogaster	20x	w; 24E12-p65ADZp in attP40; 52H01-ZpGdbd in attP2/TM6B
MB027B	20191011_45_C1	A01	Tue Oct 29 14:30:42 EDT 2019	201009	asoy_ss_screen_review	UAS_Chrimson_Venus_X_0070	Rubin		Sample#2729123899554922594	m			GMR_MB027B	GMR_MB027B-20191011_45_C1	Drosophila melanogaster	20x	w; 24H08-p65ADZp in attP40/CyO; 53F03-ZpGdbd in attP2
MB027B	20191011_46_C2	A01	Wed Oct 30 17:57:10 EDT 2019	201009	asoy_ss_screen_review	UAS_Chrimson_Venus_X_0070	Rubin		Sample#2729538249163800674	f			GMR_MB027B	GMR_MB027B-20191011_46_C2	Drosophila melanogaster	20x	w; 24H08-p65ADZp in attP40/CyO; 53F03-ZpGdbd in attP2
MB032B	20191011_45_C2	A01	Tue Oct 29 14:30:42 EDT 2019	201010	asoy_ss_screen_review	UAS_Chrimson_Venus_X_0070	Rubin		Sample#2729123899701723234	m			GMR_MB032B	GMR_MB032B-20191011_45_C2	Drosophila melanogaster	20x	w; 30G08-p65ADZp in attP40; TH-ZpGdbd in attP2
MB032B	20191011_46_C3	A01	Wed Oct 30 17:57:11 EDT 2019	201010	asoy_ss_screen_review	UAS_Chrimson_Venus_X_0070	Rubin		Sample#2729538249306407010	f			GMR_MB032B	GMR_MB032B-20191011_46_C3	Drosophila melanogaster	20x	w; 30G08-p65ADZp in attP40; TH-ZpGdbd in attP2
MB042B	20191011_45_C3	A01	Tue Oct 29 14:30:42 EDT 2019	201011	asoy_ss_screen_review	UAS_Chrimson_Venus_X_0070	Rubin		Sample#2729123899844329570	m			GMR_MB042B	GMR_MB042B-20191011_45_C3	Drosophila melanogaster	20x	w; 58E02-p65ADZp in attP40/CyO; 22E04-ZpGdbd in attP2
MB042B	20191011_46_C4	A01	Wed Oct 30 17:57:11 EDT 2019	201011	asoy_ss_screen_review	UAS_Chrimson_Venus_X_0070	Rubin		Sample#2729538249453207650	f			GMR_MB042B	GMR_MB042B-20191011_46_C4	Drosophila melanogaster	20x	w; 58E02-p65ADZp in attP40/CyO; 22E04-ZpGdbd in attP2
MB043B	20191011_45_C4	A01	Tue Oct 29 14:30:42 EDT 2019	201012	asoy_ss_screen_review	UAS_Chrimson_Venus_X_0070	Rubin		Sample#2729123899991130210	m			GMR_MB043B	GMR_MB043B-20191011_45_C4	Drosophila melanogaster	20x	w; 58E02-p65ADZp in attP40/CyO; 32D11-ZpGdbd in attP2/TM6B
MB043B	20191011_46_C5	A01	Wed Oct 30 17:57:11 EDT 2019	201012	asoy_ss_screen_review	UAS_Chrimson_Venus_X_0070	Rubin		Sample#2729538249595813986	f			GMR_MB043B	GMR_MB043B-20191011_46_C5	Drosophila melanogaster	20x	w; 58E02-p65ADZp in attP40/CyO; 32D11-ZpGdbd in attP2/TM6B
MB043C	20191018_44_E6	A01	Fri Nov 01 16:36:16 EDT 2019	201848	asoy_ss_screen_review	UAS_Chrimson_Venus_X_0070	Rubin		Sample#2730242662547325026	m			GMR_MB043C	GMR_MB043C-20191018_44_E6	Drosophila melanogaster	20x	w;; 58E02-p65ADZp in VK00027, 32D11-ZpGdbd in attP2
MB043C	20191018_45_E5	A01	Fri Nov 01 16:24:46 EDT 2019	201848	asoy_ss_screen_review	UAS_Chrimson_Venus_X_0070	Rubin		Sample#2730239768259461218	f			GMR_MB043C	GMR_MB043C-20191018_45_E5	Drosophila melanogaster	20x	w;; 58E02-p65ADZp in VK00027, 32D11-ZpGdbd in attP2
MB045B	20191011_45_C5	A01	Tue Oct 29 14:30:42 EDT 2019	201013	asoy_ss_screen_review	UAS_Chrimson_Venus_X_0070	Rubin		Sample#2729123900133736546	m			GMR_MB045B	GMR_MB045B-20191011_45_C5	Drosophila melanogaster	20x	w; 58E02-p65ADZp in attP40/CyO; 87B09-ZpGdbd in attP2
MB045B	20191011_46_C6	A01	Wed Oct 30 17:57:11 EDT 2019	201013	asoy_ss_screen_review	UAS_Chrimson_Venus_X_0070	Rubin		Sample#2729538249738420322	f			GMR_MB045B	GMR_MB045B-20191011_46_C6	Drosophila melanogaster	20x	w; 58E02-p65ADZp in attP40/CyO; 87B09-ZpGdbd in attP2
MB047B	20191011_45_E6	A01	Fri Nov 01 15:10:46 EDT 2019	201026	asoy_ss_screen_review	UAS_Chrimson_Venus_X_0070	Rubin		Sample#2730221145721667682	m			GMR_MB047B	GMR_MB047B-20191011_45_E6	Drosophila melanogaster	20x	w; 58E02-p65ADZp in attP40/CyO; 93A09-ZpGdbd in attP2
MB047B	20191011_46_F1	A01	Wed Oct 30 17:57:11 EDT 2019	201026	asoy_ss_screen_review	UAS_Chrimson_Venus_X_0070	Rubin		Sample#2729538251671994466	f			GMR_MB047B	GMR_MB047B-20191011_46_F1	Drosophila melanogaster	20x	w; 58E02-p65ADZp in attP40/CyO; 93A09-ZpGdbd in attP2
MB048B	20200710_41_E5	A01	Fri Jul 24 13:48:09 EDT 2020	212415	asoy_ss_screen_review	UAS_Chrimson_Venus_X_0070	Rubin	attP40; attP2	Sample#2826595526458212450	f			GMR_MB048B	GMR_MB048B-20200710_41_E5	Drosophila melanogaster	20x	w; 59F08-p65ADZp in attP40/CyO,Tb; 14E09-ZpGdbd in attP2
MB048B	20200710_42_E1	A01	Fri Jul 24 14:16:41 EDT 2020	212415	asoy_ss_screen_review	UAS_Chrimson_Venus_X_0070	Rubin	attP40; attP2	Sample#2826602710009118818	m			GMR_MB048B	GMR_MB048B-20200710_42_E1	Drosophila melanogaster	20x	w; 59F08-p65ADZp in attP40/CyO,Tb; 14E09-ZpGdbd in attP2
MB050B	20191011_45_F1	A01	Fri Nov 01 15:10:46 EDT 2019	201027	asoy_ss_screen_review	UAS_Chrimson_Venus_X_0070	Rubin		Sample#2730221145876856930	m			GMR_MB050B	GMR_MB050B-20191011_45_F1	Drosophila melanogaster	20x	w; 65B09-p65ADZp in attP40/CyO; 11F03-ZpGdbd in attP2/TM6B
MB050B	20191011_46_B5	A01	Wed Oct 30 17:57:10 EDT 2019	201027	asoy_ss_screen_review	UAS_Chrimson_Venus_X_0070	Rubin		Sample#2729538248731787362	f			GMR_MB050B	GMR_MB050B-20191011_46_B5	Drosophila melanogaster	20x	w; 65B09-p65ADZp in attP40/CyO; 11F03-ZpGdbd in attP2/TM6B
MB051B	20191011_45_C6	A01	Tue Oct 29 14:30:42 EDT 2019	201014	asoy_ss_screen_review	UAS_Chrimson_Venus_X_0070	Rubin		Sample#2729123900276342882	m			GMR_MB051B	GMR_MB051B-20191011_45_C6	Drosophila melanogaster	20x	w; 70B10-p65ADZp in attP40/CyO; 19F09-ZpGdbd in attP2
MB051B	20191011_46_D1	A01	Wed Oct 30 17:57:11 EDT 2019	201014	asoy_ss_screen_review	UAS_Chrimson_Venus_X_0070	Rubin		Sample#2729538249881026658	f			GMR_MB051B	GMR_MB051B-20191011_46_D1	Drosophila melanogaster	20x	w; 70B10-p65ADZp in attP40/CyO; 19F09-ZpGdbd in attP2
MB051C	20191018_44_A1	A01	Fri Nov 01 16:36:15 EDT 2019	201820	asoy_ss_screen_review	UAS_Chrimson_Venus_X_0070	Rubin		Sample#2730242658432712802	m			GMR_MB051C	GMR_MB051C-20191018_44_A1	Drosophila melanogaster	20x	w;; 70B10-p65ADZp in VK00027, 19F09-ZpGdbd in attP2
MB051C	20191018_45_A1	A01	Fri Nov 01 16:24:45 EDT 2019	201820	asoy_ss_screen_review	UAS_Chrimson_Venus_X_0070	Rubin		Sample#2730239763897385058	f			GMR_MB051C	GMR_MB051C-20191018_45_A1	Drosophila melanogaster	20x	w;; 70B10-p65ADZp in VK00027, 19F09-ZpGdbd in attP2
MB056B	20191011_45_D1	A01	Tue Oct 29 14:30:42 EDT 2019	201015	asoy_ss_screen_review	UAS_Chrimson_Venus_X_0070	Rubin		Sample#2729123900418949218	m			GMR_MB056B	GMR_MB056B-20191011_45_D1	Drosophila melanogaster	20x	w; 76F05-p65ADZp in attP40; 80G12-ZpGdbd in attP2
MB056B	20191011_46_D2	A01	Wed Oct 30 17:57:11 EDT 2019	201015	asoy_ss_screen_review	UAS_Chrimson_Venus_X_0070	Rubin		Sample#2729538250019438690	f			GMR_MB056B	GMR_MB056B-20191011_46_D2	Drosophila melanogaster	20x	w; 76F05-p65ADZp in attP40; 80G12-ZpGdbd in attP2
MB057B	20191011_45_D2	A01	Tue Oct 29 14:30:42 EDT 2019	201016	asoy_ss_screen_review	UAS_Chrimson_Venus_X_0070	Rubin		Sample#2729123900586721378	m			GMR_MB057B	GMR_MB057B-20191011_45_D2	Drosophila melanogaster	20x	w; 80G12-p65ADZp in attP40/CyO; 53H03-ZpGdbd in attP2
MB057B	20191011_46_D3	A01	Wed Oct 30 17:57:11 EDT 2019	201016	asoy_ss_screen_review	UAS_Chrimson_Venus_X_0070	Rubin		Sample#2729538250162045026	f			GMR_MB057B	GMR_MB057B-20191011_46_D3	Drosophila melanogaster	20x	w; 80G12-p65ADZp in attP40/CyO; 53H03-ZpGdbd in attP2
MB058B	20191011_45_D3	A01	Tue Oct 29 14:30:42 EDT 2019	201017	asoy_ss_screen_review	UAS_Chrimson_Venus_X_0070	Rubin		Sample#2729123900746104930	m			GMR_MB058B	GMR_MB058B-20191011_45_D3	Drosophila melanogaster	20x	w; 82C10-p65ADZp in attP40/CyO; 50B03-ZpGdbd in attP2
MB058B	20191011_46_D4	A01	Wed Oct 30 17:57:11 EDT 2019	201017	asoy_ss_screen_review	UAS_Chrimson_Venus_X_0070	Rubin		Sample#2729538250300457058	f			GMR_MB058B	GMR_MB058B-20191011_46_D4	Drosophila melanogaster	20x	w; 82C10-p65ADZp in attP40/CyO; 50B03-ZpGdbd in attP2
MB060B	20191011_45_D4	A01	Tue Oct 29 14:30:42 EDT 2019	201018	asoy_ss_screen_review	UAS_Chrimson_Venus_X_0070	Rubin		Sample#2729123900905488482	m			GMR_MB060B	GMR_MB060B-20191011_45_D4	Drosophila melanogaster	20x	w; 82C10-p65ADZp in attP40/CyO; 72B05-ZpGdbd in attP2/TM6B
MB060B	20191011_46_D5	A01	Wed Oct 30 17:57:11 EDT 2019	201018	asoy_ss_screen_review	UAS_Chrimson_Venus_X_0070	Rubin		Sample#2729538250443063394	f			GMR_MB060B	GMR_MB060B-20191011_46_D5	Drosophila melanogaster	20x	w; 82C10-p65ADZp in attP40/CyO; 72B05-ZpGdbd in attP2/TM6B
MB062B	20191011_45_D5	A01	Tue Oct 29 14:30:42 EDT 2019	201019	asoy_ss_screen_review	UAS_Chrimson_Venus_X_0070	Rubin		Sample#2729123901069066338	m			GMR_MB062B	GMR_MB062B-20191011_45_D5	Drosophila melanogaster	20x	w; 92E10-p65ADZp in attP40; 71D08-ZpGdbd in attP2
MB062B	20191011_46_D6	A01	Wed Oct 30 17:57:11 EDT 2019	201019	asoy_ss_screen_review	UAS_Chrimson_Venus_X_0070	Rubin		Sample#2729538250585669730	f			GMR_MB062B	GMR_MB062B-20191011_46_D6	Drosophila melanogaster	20x	w; 92E10-p65ADZp in attP40; 71D08-ZpGdbd in attP2
MB063B	20191011_45_A2	A01	Tue Oct 29 14:30:41 EDT 2019	200998	asoy_ss_screen_review	UAS_Chrimson_Venus_X_0070	Rubin		Sample#2729123897923338338	m			GMR_MB063B	GMR_MB063B-20191011_45_A2	Drosophila melanogaster	20x	w; 93D10-p65ADZp in attP40/CyO; 68C09-ZpGdbd in attP2
MB063B	20191011_46_A2	A01	Wed Oct 30 17:57:10 EDT 2019	200998	asoy_ss_screen_review	UAS_Chrimson_Venus_X_0070	Rubin		Sample#2729538247427358818	f			GMR_MB063B	GMR_MB063B-20191011_46_A2	Drosophila melanogaster	20x	w; 93D10-p65ADZp in attP40/CyO; 68C09-ZpGdbd in attP2
MB077C	20191011_45_E2	A01	Tue Oct 29 14:30:42 EDT 2019	201022	asoy_ss_screen_review	UAS_Chrimson_Venus_X_0070	Rubin		Sample#2729123901547216994	m			GMR_MB077C	GMR_MB077C-20191011_45_E2	Drosophila melanogaster	20x	w;; 25D01-p65ADZp in VK00027, 19F09-ZpGdbd in attP2
MB077C	20191011_46_E3	A01	Wed Oct 30 17:57:11 EDT 2019	201022	asoy_ss_screen_review	UAS_Chrimson_Venus_X_0070	Rubin		Sample#2729538251017683042	f			GMR_MB077C	GMR_MB077C-20191011_46_E3	Drosophila melanogaster	20x	w;; 25D01-p65ADZp in VK00027, 19F09-ZpGdbd in attP2
MB080C	20191011_45_E3	A01	Tue Oct 29 14:30:42 EDT 2019	201023	asoy_ss_screen_review	UAS_Chrimson_Venus_X_0070	Rubin		Sample#2729123901702406242	m			GMR_MB080C	GMR_MB080C-20191011_45_E3	Drosophila melanogaster	20x	w; 33E02-p65ADZp in VK00027, 50A05-ZpGdbd in attP2/TM3
MB080C	20191011_46_E4	A01	Wed Oct 30 17:57:11 EDT 2019	201023	asoy_ss_screen_review	UAS_Chrimson_Venus_X_0070	Rubin		Sample#2729538251160289378	f			GMR_MB080C	GMR_MB080C-20191011_46_E4	Drosophila melanogaster	20x	w; 33E02-p65ADZp in VK00027, 50A05-ZpGdbd in attP2/TM3
MB082C	20191011_45_E4	A01	Fri Nov 01 15:10:46 EDT 2019	201024	asoy_ss_screen_review	UAS_Chrimson_Venus_X_0070	Rubin		Sample#2730221145394511970	m			GMR_MB082C	GMR_MB082C-20191011_45_E4	Drosophila melanogaster	20x	w;; 40B08-p65ADZp in VK00027, 23C06-ZpGdbd in attP2
MB082C	20191011_46_E5	A01	Wed Oct 30 17:57:11 EDT 2019	201024	asoy_ss_screen_review	UAS_Chrimson_Venus_X_0070	Rubin		Sample#2729538251302895714	f			GMR_MB082C	GMR_MB082C-20191011_46_E5	Drosophila melanogaster	20x	w;; 40B08-p65ADZp in VK00027, 23C06-ZpGdbd in attP2
MB083C	20191018_44_A5	A01	Fri Nov 01 16:36:15 EDT 2019	201824	asoy_ss_screen_review	UAS_Chrimson_Venus_X_0070	Rubin		Sample#2730242659032498274	m			GMR_MB083C	GMR_MB083C-20191018_44_A5	Drosophila melanogaster	20x	w;; 52G04-p65ADZp in VK00027, 94B10-ZpGdbd in attP2
MB083C	20191018_45_A5	A01	Fri Nov 01 16:24:45 EDT 2019	201824	asoy_ss_screen_review	UAS_Chrimson_Venus_X_0070	Rubin		Sample#2730239764534919266	f			GMR_MB083C	GMR_MB083C-20191018_45_A5	Drosophila melanogaster	20x	w;; 52G04-p65ADZp in VK00027, 94B10-ZpGdbd in attP2
MB085C	20191018_44_A6	A01	Fri Nov 01 16:36:15 EDT 2019	201825	asoy_ss_screen_review	UAS_Chrimson_Venus_X_0070	Rubin		Sample#2730242659179298914	m			GMR_MB085C	GMR_MB085C-20191018_44_A6	Drosophila melanogaster	20x	w;; 52H01-p65ADZp in VK00027, 52B07-ZpGdbd in attP2
MB085C	20191018_45_A6	A01	Fri Nov 01 16:24:45 EDT 2019	201825	asoy_ss_screen_review	UAS_Chrimson_Venus_X_0070	Rubin		Sample#2730239764690108514	f			GMR_MB085C	GMR_MB085C-20191018_45_A6	Drosophila melanogaster	20x	w;; 52H01-p65ADZp in VK00027, 52B07-ZpGdbd in attP2
MB093C	20191018_44_B1	A01	Fri Nov 01 16:36:15 EDT 2019	201826	asoy_ss_screen_review	UAS_Chrimson_Venus_X_0070	Rubin		Sample#2730242659326099554	m			GMR_MB093C	GMR_MB093C-20191018_44_B1	Drosophila melanogaster	20x	w;; 73H08-p65ADZp in VK00027, 40B08-ZpGdbd in attP2/TM3
MB093C	20191018_45_B1	A01	Fri Nov 01 16:24:45 EDT 2019	201826	asoy_ss_screen_review	UAS_Chrimson_Venus_X_0070	Rubin		Sample#2730239764845297762	f			GMR_MB093C	GMR_MB093C-20191018_45_B1	Drosophila melanogaster	20x	w;; 73H08-p65ADZp in VK00027, 40B08-ZpGdbd in attP2/TM3
MB099C	20191018_44_B2	A01	Fri Nov 01 16:36:15 EDT 2019	201827	asoy_ss_screen_review	UAS_Chrimson_Venus_X_0070	Rubin		Sample#2730242659477094498	m			GMR_MB099C	GMR_MB099C-20191018_44_B2	Drosophila melanogaster	20x	w;; TH-p65ADZp in VK00027, 73F07-ZpGdbd in attP2
MB099C	20191018_45_B2	A01	Fri Nov 01 16:24:45 EDT 2019	201827	asoy_ss_screen_review	UAS_Chrimson_Venus_X_0070	Rubin		Sample#2730239765000487010	f			GMR_MB099C	GMR_MB099C-20191018_45_B2	Drosophila melanogaster	20x	w;; TH-p65ADZp in VK00027, 73F07-ZpGdbd in attP2
MB109B	20191018_44_B3	A01	Fri Nov 01 16:36:15 EDT 2019	201828	asoy_ss_screen_review	UAS_Chrimson_Venus_X_0070	Rubin		Sample#2730242659623895138	m			GMR_MB109B	GMR_MB109B-20191018_44_B3	Drosophila melanogaster	20x	w; 76F05-p65ADZp in attP40/CyO; 23C12-ZpGdbd in attP2
MB109B	20191018_45_B3	A01	Fri Nov 01 16:24:45 EDT 2019	201828	asoy_ss_screen_review	UAS_Chrimson_Venus_X_0070	Rubin		Sample#2730239765159870562	f			GMR_MB109B	GMR_MB109B-20191018_45_B3	Drosophila melanogaster	20x	w; 76F05-p65ADZp in attP40/CyO; 23C12-ZpGdbd in attP2
MB110C	20191018_44_B4	A01	Fri Nov 01 16:36:15 EDT 2019	201829	asoy_ss_screen_review	UAS_Chrimson_Venus_X_0070	Rubin		Sample#2730242659770695778	m			GMR_MB110C	GMR_MB110C-20191018_44_B4	Drosophila melanogaster	20x	w;; 20A02-p65ADZp in VK00027, 94B10-ZpGdbd in attP2
MB110C	20191018_45_B4	A01	Fri Nov 01 16:24:45 EDT 2019	201829	asoy_ss_screen_review	UAS_Chrimson_Venus_X_0070	Rubin		Sample#2730239765315059810	f			GMR_MB110C	GMR_MB110C-20191018_45_B4	Drosophila melanogaster	20x	w;; 20A02-p65ADZp in VK00027, 94B10-ZpGdbd in attP2
MB112C	20191018_44_B6	A01	Fri Nov 01 16:36:15 EDT 2019	201830	asoy_ss_screen_review	UAS_Chrimson_Venus_X_0070	Rubin		Sample#2730242659913302114	m			GMR_MB112C	GMR_MB112C-20191018_44_B6	Drosophila melanogaster	20x	w;; 93D10-p65ADZp in VK00027, 13F04-ZpGdbd in attP2
MB112C	20191018_45_B5	A01	Fri Nov 01 16:24:45 EDT 2019	201830	asoy_ss_screen_review	UAS_Chrimson_Venus_X_0070	Rubin		Sample#2730239765470249058	f			GMR_MB112C	GMR_MB112C-20191018_45_B5	Drosophila melanogaster	20x	w;; 93D10-p65ADZp in VK00027, 13F04-ZpGdbd in attP2
MB113C	20191018_44_C1	A01	Fri Nov 01 16:36:15 EDT 2019	201831	asoy_ss_screen_review	UAS_Chrimson_Venus_X_0070	Rubin		Sample#2730242660055908450	m			GMR_MB113C	GMR_MB113C-20191018_44_C1	Drosophila melanogaster	20x	w;; TDC2-p65ADZp in VK00027, 95A10-ZpGdbd in attP2
MB113C	20191018_45_B6	A01	Fri Nov 01 16:24:45 EDT 2019	201831	asoy_ss_screen_review	UAS_Chrimson_Venus_X_0070	Rubin		Sample#2730239765625438306	f			GMR_MB113C	GMR_MB113C-20191018_45_B6	Drosophila melanogaster	20x	w;; TDC2-p65ADZp in VK00027, 95A10-ZpGdbd in attP2
MB116B	20230112_42_A1	A01	Tue Jan 24 16:08:06 EST 2023	253249	asoy_ss_screen_review	UAS_Chrimson_Venus_X_0070	Aso	attP40; attP2	Sample#3157868356841767010	f	Aso	Yoshi Aso	GMR_MB116B	GMR_MB116B-20230112_42_A1	Drosophila melanogaster	20x	w; 10E06-p65ADZp in attP40/CyO,Tb; 35B12-ZpGdbd in attP2/TM6B
MB116B	20230112_42_B4	A01	Tue Jan 24 16:08:06 EST 2023	253249	asoy_ss_screen_review	UAS_Chrimson_Venus_X_0070	Aso	attP40; attP2	Sample#3157868357886148706	m	Aso	Yoshi Aso	GMR_MB116B	GMR_MB116B-20230112_42_B4	Drosophila melanogaster	20x	w; 10E06-p65ADZp in attP40/CyO,Tb; 35B12-ZpGdbd in attP2/TM6B
MB122B	20220422_45_A6	A01	Thu May 05 12:45:07 EDT 2022	245671	nerna_ss_screen_review	UAS_Chrimson_Venus_X_0070	Aso	attP40; attP2	Sample#3062131779356852322	f	Rubin	Aljoscha Nern	GMR_MB122B	GMR_MB122B-20220422_45_A6	Drosophila melanogaster	20x	w; 12G04-p65ADZp in attP40/CyO::Tb-RFP; 18D09-ZpGdbd in attP2
MB122B	20220422_46_A6	A01	Thu May 05 15:23:06 EDT 2022	245671	nerna_ss_screen_review	UAS_Chrimson_Venus_X_0070	Aso	attP40; attP2	Sample#3062171537432903778	m	Rubin	Aljoscha Nern	GMR_MB122B	GMR_MB122B-20220422_46_A6	Drosophila melanogaster	20x	w; 12G04-p65ADZp in attP40/CyO::Tb-RFP; 18D09-ZpGdbd in attP2
MB155B	20200710_41_B4	A01	Sat Jul 25 05:57:37 EDT 2020	212389	asoy_ss_screen_review	UAS_Chrimson_Venus_X_0070	Aso	attP40; attP2	Sample#2826839501085605986	f			GMR_MB155B	GMR_MB155B-20200710_41_B4	Drosophila melanogaster	20x	w; 24E06-p65ADZp in attP40; 30H02-ZpGdbd in attP2
MB155B	20200710_42_B3	A01	Fri Jul 24 14:16:40 EDT 2020	212389	asoy_ss_screen_review	UAS_Chrimson_Venus_X_0070	Aso	attP40; attP2	Sample#2826602703667331170	m			GMR_MB155B	GMR_MB155B-20200710_42_B3	Drosophila melanogaster	20x	w; 24E06-p65ADZp in attP40; 30H02-ZpGdbd in attP2
MB185B	20191018_44_C4	A01	Fri Nov 01 16:36:15 EDT 2019	201834	asoy_ss_screen_review	UAS_Chrimson_Venus_X_0070	Rubin		Sample#2730242660487921762	m			GMR_MB185B	GMR_MB185B-20191018_44_C4	Drosophila melanogaster	20x	w; 52H09-p65ADZp in attP40/CyO; 18F09-ZpGdbd in attP2
MB185B	20191018_45_C3	A01	Fri Nov 01 16:24:45 EDT 2019	201834	asoy_ss_screen_review	UAS_Chrimson_Venus_X_0070	Rubin		Sample#2730239766091006050	f			GMR_MB185B	GMR_MB185B-20191018_45_C3	Drosophila melanogaster	20x	w; 52H09-p65ADZp in attP40/CyO; 18F09-ZpGdbd in attP2
MB188B	20191018_44_C5	A01	Fri Nov 01 16:36:15 EDT 2019	201835	asoy_ss_screen_review	UAS_Chrimson_Venus_X_0070	Rubin		Sample#2730242660634722402	m			GMR_MB188B	GMR_MB188B-20191018_44_C5	Drosophila melanogaster	20x	w; 58E02-p65ADZp in attP40/CyO; 11A03-ZpGdbd in attP2/TM6B
MB188B	20191018_45_C4	A01	Fri Nov 01 16:24:45 EDT 2019	201835	asoy_ss_screen_review	UAS_Chrimson_Venus_X_0070	Rubin		Sample#2730239766246195298	f			GMR_MB188B	GMR_MB188B-20191018_45_C4	Drosophila melanogaster	20x	w; 58E02-p65ADZp in attP40/CyO; 11A03-ZpGdbd in attP2/TM6B
MB195B	20191018_44_D1	A01	Fri Nov 01 16:36:15 EDT 2019	201837	asoy_ss_screen_review	UAS_Chrimson_Venus_X_0070	Rubin		Sample#2730242660928323682	m			GMR_MB195B	GMR_MB195B-20191018_44_D1	Drosophila melanogaster	20x	w; 58E02-p65ADZp in attP40/CyO; 31F06-ZpGdbd in attP2
MB195B	20191018_45_C6	A01	Fri Nov 01 16:24:45 EDT 2019	201837	asoy_ss_screen_review	UAS_Chrimson_Venus_X_0070	Rubin		Sample#2730239766552379490	f			GMR_MB195B	GMR_MB195B-20191018_45_C6	Drosophila melanogaster	20x	w; 58E02-p65ADZp in attP40/CyO; 31F06-ZpGdbd in attP2
MB203B	20230112_42_A2	A01	Tue Jan 24 16:08:06 EST 2023	253250	asoy_ss_screen_review	UAS_Chrimson_Venus_X_0070	Aso	attP40; attP2	Sample#3157868356984373346	f	Aso	Yoshi Aso	GMR_MB203B	GMR_MB203B-20230112_42_A2	Drosophila melanogaster	20x	w; 71D08-p65ADZp in attP40/CyO,Tb; 24H08-ZpGdbd in attP2/TM6B
MB203B	20230112_42_B5	A01	Tue Jan 24 16:08:06 EST 2023	253250	asoy_ss_screen_review	UAS_Chrimson_Venus_X_0070	Aso	attP40; attP2	Sample#3157868357995200610	m	Aso	Yoshi Aso	GMR_MB203B	GMR_MB203B-20230112_42_B5	Drosophila melanogaster	20x	w; 71D08-p65ADZp in attP40/CyO,Tb; 24H08-ZpGdbd in attP2/TM6B
MB206B	20200710_41_C1	A01	Sat Jul 25 05:57:37 EDT 2020	212391	asoy_ss_screen_review	UAS_Chrimson_Venus_X_0070	Aso	attP40; attP2	Sample#2826839501819609186	f			GMR_MB206B	GMR_MB206B-20200710_41_C1	Drosophila melanogaster	20x	w; 71D08-p65ADZp in attP40/CyO,Tb; 53F03-ZpGdbd in attP2/TM6B
MB206B	20200710_42_B5	A01	Fri Jul 24 14:16:40 EDT 2020	212391	asoy_ss_screen_review	UAS_Chrimson_Venus_X_0070	Aso	attP40; attP2	Sample#2826602704510386274	m			GMR_MB206B	GMR_MB206B-20200710_42_B5	Drosophila melanogaster	20x	w; 71D08-p65ADZp in attP40/CyO,Tb; 53F03-ZpGdbd in attP2/TM6B
MB210B	20191018_44_D3	A01	Fri Nov 01 16:36:15 EDT 2019	201839	asoy_ss_screen_review	UAS_Chrimson_Venus_X_0070	Rubin		Sample#2730242661221924962	m			GMR_MB210B	GMR_MB210B-20191018_44_D3	Drosophila melanogaster	20x	w; 15B01-p65ADZp in attP40; 27G01-ZpGdbd in attP2/TM6B
MB210B	20191018_45_D2	A01	Fri Nov 01 16:24:45 EDT 2019	201839	asoy_ss_screen_review	UAS_Chrimson_Venus_X_0070	Rubin		Sample#2730239766866952290	f			GMR_MB210B	GMR_MB210B-20191018_45_D2	Drosophila melanogaster	20x	w; 15B01-p65ADZp in attP40; 27G01-ZpGdbd in attP2/TM6B
MB213B	20191018_44_D4	A01	Fri Nov 01 16:36:15 EDT 2019	201840	asoy_ss_screen_review	UAS_Chrimson_Venus_X_0070	Rubin		Sample#2730242661368725602	m			GMR_MB213B	GMR_MB213B-20191018_44_D4	Drosophila melanogaster	20x	w; 76F05-p65ADZp in attP40; 32G08-ZpGdbd in attP2/TM6B
MB213B	20191018_45_D3	A01	Fri Nov 01 16:24:45 EDT 2019	201840	asoy_ss_screen_review	UAS_Chrimson_Venus_X_0070	Rubin		Sample#2730239767017947234	f			GMR_MB213B	GMR_MB213B-20191018_45_D3	Drosophila melanogaster	20x	w; 76F05-p65ADZp in attP40; 32G08-ZpGdbd in attP2/TM6B
MB242A	20191018_44_D5	A01	Fri Nov 01 16:36:15 EDT 2019	201841	asoy_ss_screen_review	UAS_Chrimson_Venus_X_0070	Rubin		Sample#2730242661515526242	m			GMR_MB242A	GMR_MB242A-20191018_44_D5	Drosophila melanogaster	20x	w, 64F07-p65ADZp in su(Hw)attP8; ; 57C10-ZpGdbd in attP2/TM6B
MB242A	20191018_45_D4	A01	Fri Nov 01 16:24:45 EDT 2019	201841	asoy_ss_screen_review	UAS_Chrimson_Venus_X_0070	Rubin		Sample#2730239767173136482	f			GMR_MB242A	GMR_MB242A-20191018_45_D4	Drosophila melanogaster	20x	w, 64F07-p65ADZp in su(Hw)attP8; ; 57C10-ZpGdbd in attP2/TM6B
MB242A	20200207_42_A5	A01	Wed Feb 26 17:21:26 EST 2020	207944	asoy_ss_screen_review	UAS_Chrimson_Venus_X_0070	Rubin		Sample#2772668508591358050	f			GMR_MB242A	GMR_MB242A-20200207_42_A5	Drosophila melanogaster	20x	w, 64F07-p65ADZp in su(Hw)attP8; ; 57C10-ZpGdbd in attP2/TM6B
MB242A	20200207_42_B5	A01	Wed Feb 26 17:21:26 EST 2020	207944	asoy_ss_screen_review	UAS_Chrimson_Venus_X_0070	Rubin		Sample#2772668509480550498	m			GMR_MB242A	GMR_MB242A-20200207_42_B5	Drosophila melanogaster	20x	w, 64F07-p65ADZp in su(Hw)attP8; ; 57C10-ZpGdbd in attP2/TM6B
MB242A	20230421_46_C1	A01	Tue May 02 09:33:05 EDT 2023	256125	asoy_ss_screen_review	UAS_Chrimson_Venus_X_0070	Aso	su(Hw)attP8; ; attP2	Sample#3193267859828506783	f	Rubin	Yoshi Aso	GMR_MB242A	GMR_MB242A-20230421_46_C1	Drosophila melanogaster	20x	w, 64F07-p65ADZp in su(Hw)attP8; ; 57C10-ZpGdbd in attP2/TM6B
MB242A	20230421_46_F2	A01	Tue May 02 09:33:06 EDT 2023	256125	asoy_ss_screen_review	UAS_Chrimson_Venus_X_0070	Aso	su(Hw)attP8; ; attP2	Sample#3193267863121035423	m	Rubin	Yoshi Aso	GMR_MB242A	GMR_MB242A-20230421_46_F2	Drosophila melanogaster	20x	w, 64F07-p65ADZp in su(Hw)attP8; ; 57C10-ZpGdbd in attP2/TM6B
MB246A	20201016_43_D5	A01	Thu Nov 12 11:00:22 EST 2020	214775	asoy_ss_screen_review	UAS_Chrimson_Venus_X_0070	Rubin	su(Hw)attP8; ; attP2	Sample#2866793455848259682	f			GMR_MB246A	GMR_MB246A-20201016_43_D5	Drosophila melanogaster	20x	w, Tdc2-p65ADZp in su(Hw)attP8;; 30H02-ZpGdbd in attP2
MB246A	20201016_43_I5	A01	Thu Nov 12 11:00:22 EST 2020	214775	asoy_ss_screen_review	UAS_Chrimson_Venus_X_0070	Rubin	su(Hw)attP8; ; attP2	Sample#2866793457941217378	m			GMR_MB246A	GMR_MB246A-20201016_43_I5	Drosophila melanogaster	20x	w, Tdc2-p65ADZp in su(Hw)attP8;; 30H02-ZpGdbd in attP2
MB252C	20200710_41_C2	A01	Sat Jul 25 05:57:37 EDT 2020	212392	asoy_ss_screen_review	UAS_Chrimson_Venus_X_0070	Aso	VK00027, attP2	Sample#2826839502167736418	f			GMR_MB252C	GMR_MB252C-20200710_41_C2	Drosophila melanogaster	20x	w;; 20C11-p65ADZp in VK00027, 21G01-ZpGdbd in attP2
MB252C	20200710_42_B6	A01	Fri Jul 24 14:16:40 EDT 2020	212392	asoy_ss_screen_review	UAS_Chrimson_Venus_X_0070	Aso	VK00027, attP2	Sample#2826602704917233762	m			GMR_MB252C	GMR_MB252C-20200710_42_B6	Drosophila melanogaster	20x	w;; 20C11-p65ADZp in VK00027, 21G01-ZpGdbd in attP2
MB298B	20191018_44_E1	A01	Fri Nov 01 16:36:16 EDT 2019	201843	asoy_ss_screen_review	UAS_Chrimson_Venus_X_0070	Rubin		Sample#2730242661813321826	m			GMR_MB298B	GMR_MB298B-20191018_44_E1	Drosophila melanogaster	20x	w; 53C03-p65ADZp in attP40/CyO; 24E12-ZpGdbd in attP2/TM6B
MB298B	20191018_45_D6	A01	Fri Nov 01 16:24:45 EDT 2019	201843	asoy_ss_screen_review	UAS_Chrimson_Venus_X_0070	Rubin		Sample#2730239767475126370	f			GMR_MB298B	GMR_MB298B-20191018_45_D6	Drosophila melanogaster	20x	w; 53C03-p65ADZp in attP40/CyO; 24E12-ZpGdbd in attP2/TM6B
MB299B	20191018_44_E2	A01	Fri Nov 01 16:36:16 EDT 2019	201844	asoy_ss_screen_review	UAS_Chrimson_Venus_X_0070	Rubin		Sample#2730242661960122466	m			GMR_MB299B	GMR_MB299B-20191018_44_E2	Drosophila melanogaster	20x	w; 58E02-p65ADZp in attP40/CyO; 37E10-ZpGdbd in attP2/TM6B
MB299B	20191018_45_E1	A01	Fri Nov 01 16:24:46 EDT 2019	201844	asoy_ss_screen_review	UAS_Chrimson_Venus_X_0070	Rubin		Sample#2730239767638704226	f			GMR_MB299B	GMR_MB299B-20191018_45_E1	Drosophila melanogaster	20x	w; 58E02-p65ADZp in attP40/CyO; 37E10-ZpGdbd in attP2/TM6B
MB301B	20200207_42_A6	A01	Wed Feb 26 17:21:26 EST 2020	207945	asoy_ss_screen_review	UAS_Chrimson_Venus_X_0070	Rubin		Sample#2772668508738158690	f			GMR_MB301B	GMR_MB301B-20200207_42_A6	Drosophila melanogaster	20x	w; 71D01-p65ADZp in attP40/CyO; 58F02-ZpGdbd in attP2
MB301B	20200207_42_B6	A01	Wed Feb 26 17:21:26 EST 2020	207945	asoy_ss_screen_review	UAS_Chrimson_Venus_X_0070	Rubin		Sample#2772668509660905570	m			GMR_MB301B	GMR_MB301B-20200207_42_B6	Drosophila melanogaster	20x	w; 71D01-p65ADZp in attP40/CyO; 58F02-ZpGdbd in attP2
MB302B	20230112_42_A3	A01	Tue Jan 24 16:08:06 EST 2023	253251	asoy_ss_screen_review	UAS_Chrimson_Venus_X_0070	Aso	attP40; attP2	Sample#3157868357101813858	f	Aso	Yoshi Aso	GMR_MB302B	GMR_MB302B-20230112_42_A3	Drosophila melanogaster	20x	w; 73F07-p65ADZp in attP40; 30E11-ZpGdbd in attP2
MB302B	20230112_42_B6	A01	Tue Jan 24 16:08:06 EST 2023	253251	asoy_ss_screen_review	UAS_Chrimson_Venus_X_0070	Aso	attP40; attP2	Sample#3157868358108446818	m	Aso	Yoshi Aso	GMR_MB302B	GMR_MB302B-20230112_42_B6	Drosophila melanogaster	20x	w; 73F07-p65ADZp in attP40; 30E11-ZpGdbd in attP2
MB304B	20191018_44_F2	A01	Fri Nov 01 16:36:16 EDT 2019	201850	asoy_ss_screen_review	UAS_Chrimson_Venus_X_0070	Rubin		Sample#2730242662836732002	m			GMR_MB304B	GMR_MB304B-20191018_44_F2	Drosophila melanogaster	20x	w; 82C10-p65ADZp in attP40/CyO; 26F01-ZpGdbd in attP2
MB304B	20191018_45_F1	A01	Fri Nov 01 16:24:46 EDT 2019	201850	asoy_ss_screen_review	UAS_Chrimson_Venus_X_0070	Rubin		Sample#2730239768569839714	f			GMR_MB304B	GMR_MB304B-20191018_45_F1	Drosophila melanogaster	20x	w; 82C10-p65ADZp in attP40/CyO; 26F01-ZpGdbd in attP2
MB308B	20191018_44_E4	A01	Fri Nov 01 16:36:16 EDT 2019	201846	asoy_ss_screen_review	UAS_Chrimson_Venus_X_0070	Rubin		Sample#2730242662253723746	m			GMR_MB308B	GMR_MB308B-20191018_44_E4	Drosophila melanogaster	20x	w; MR_TH-p65ADZp in attP40/CyO; 26F01-ZpGdbd in attP2
MB308B	20191018_45_E3	A01	Fri Nov 01 16:24:46 EDT 2019	201846	asoy_ss_screen_review	UAS_Chrimson_Venus_X_0070	Rubin		Sample#2730239767949082722	f			GMR_MB308B	GMR_MB308B-20191018_45_E3	Drosophila melanogaster	20x	w; MR_TH-p65ADZp in attP40/CyO; 26F01-ZpGdbd in attP2
MB310C	20191018_44_E5	A01	Fri Nov 01 16:36:16 EDT 2019	201847	asoy_ss_screen_review	UAS_Chrimson_Venus_X_0070	Rubin		Sample#2730242662400524386	m			GMR_MB310C	GMR_MB310C-20191018_44_E5	Drosophila melanogaster	20x	w;; 52G04-p65ADZp in VK00027, 17C11-ZpGdbd in attP2
MB310C	20191018_45_E4	A01	Fri Nov 01 16:24:46 EDT 2019	201847	asoy_ss_screen_review	UAS_Chrimson_Venus_X_0070	Rubin		Sample#2730239768104271970	f			GMR_MB310C	GMR_MB310C-20191018_45_E4	Drosophila melanogaster	20x	w;; 52G04-p65ADZp in VK00027, 17C11-ZpGdbd in attP2
MB312C	20191018_44_A2	A01	Fri Nov 01 16:36:15 EDT 2019	201821	asoy_ss_screen_review	UAS_Chrimson_Venus_X_0070	Rubin		Sample#2730242658592096354	m			GMR_MB312C	GMR_MB312C-20191018_44_A2	Drosophila melanogaster	20x	w;; 58E02-p65ADZp in VK00027; 10G03-ZpGdbd in attP2
MB312C	20191018_45_A2	A01	Fri Nov 01 16:24:45 EDT 2019	201821	asoy_ss_screen_review	UAS_Chrimson_Venus_X_0070	Rubin		Sample#2730239764077740130	f			GMR_MB312C	GMR_MB312C-20191018_45_A2	Drosophila melanogaster	20x	w;; 58E02-p65ADZp in VK00027; 10G03-ZpGdbd in attP2
MB313C	20191025_44_A4	A01	Wed Nov 06 18:07:13 EST 2019	202178	asoy_ss_screen_review	UAS_Chrimson_Venus_X_0070	Rubin		Sample#2732092592773660770	f			GMR_MB313C	GMR_MB313C-20191025_44_A4	Drosophila melanogaster	20x	w;; 58E02-p65ADZp in VK00027, 17C11-ZpGdbd in attP2
MB313C	20191025_44_B4	A01	Wed Nov 06 18:07:14 EST 2019	202178	asoy_ss_screen_review	UAS_Chrimson_Venus_X_0070	Rubin		Sample#2732092593784488034	m			GMR_MB313C	GMR_MB313C-20191025_44_B4	Drosophila melanogaster	20x	w;; 58E02-p65ADZp in VK00027, 17C11-ZpGdbd in attP2
MB315C	20191025_44_A5	A01	Wed Nov 06 18:07:13 EST 2019	202179	asoy_ss_screen_review	UAS_Chrimson_Venus_X_0070	Rubin		Sample#2732092592933044322	f			GMR_MB315C	GMR_MB315C-20191025_44_A5	Drosophila melanogaster	20x	w;; 58E02-p65ADZp in VK00027, 48H11-ZpGdbd in attP2
MB315C	20191025_44_B5	A01	Wed Nov 06 18:07:14 EST 2019	202179	asoy_ss_screen_review	UAS_Chrimson_Venus_X_0070	Rubin		Sample#2732092593948065890	m			GMR_MB315C	GMR_MB315C-20191025_44_B5	Drosophila melanogaster	20x	w;; 58E02-p65ADZp in VK00027, 48H11-ZpGdbd in attP2
MB320C	20191025_44_A3	A01	Wed Nov 06 18:07:13 EST 2019	202171	asoy_ss_screen_review	UAS_Chrimson_Venus_X_0070	Aso		Sample#2732092592614277218	f			GMR_MB320C	GMR_MB320C-20191025_44_A3	Drosophila melanogaster	20x	w;; TH-p65ADZp in VK00027, 22B12-ZpGdbd in attP2/TM3
MB320C	20191025_44_B1	A01	Wed Nov 06 18:07:14 EST 2019	202171	asoy_ss_screen_review	UAS_Chrimson_Venus_X_0070	Aso		Sample#2732092593256005730	m			GMR_MB320C	GMR_MB320C-20191025_44_B1	Drosophila melanogaster	20x	w;; TH-p65ADZp in VK00027, 22B12-ZpGdbd in attP2/TM3
MB320C	20230407_43_J1	A01	Thu Apr 20 14:26:04 EDT 2023	255525	asoy_ss_screen_review	UAS_Chrimson_Venus_X_0070	Aso	VK00027, attP2	Sample#3188992936561868959	f	Rubin	Yoshi Aso	GMR_MB320C	GMR_MB320C-20230407_43_J1	Drosophila melanogaster	20x	w;; TH-p65ADZp in VK00027, 22B12-ZpGdbd in attP2/TM3
MB320C	20230407_43_J2	A01	Thu Apr 20 14:26:04 EDT 2023	255525	asoy_ss_screen_review	UAS_Chrimson_Venus_X_0070	Aso	VK00027, attP2	Sample#3188992936742224031	m	Rubin	Yoshi Aso	GMR_MB320C	GMR_MB320C-20230407_43_J2	Drosophila melanogaster	20x	w;; TH-p65ADZp in VK00027, 22B12-ZpGdbd in attP2/TM3
MB370B	20191101_45_B3	A01	Wed Nov 13 16:22:06 EST 2019	202603	asoy_ss_screen_review	UAS_Chrimson_Venus_X_0070	Rubin		Sample#2734602852327489634	m			GMR_MB370B	GMR_MB370B-20191101_45_B3	Drosophila melanogaster	20x	w; 13F02-p65ADZp in attP40; 41C07-ZpGdbd in attP2
MB370B	20191101_45_D1	A01	Wed Nov 13 16:22:06 EST 2019	202603	asoy_ss_screen_review	UAS_Chrimson_Venus_X_0070	Rubin		Sample#2734602853740970082	f			GMR_MB370B	GMR_MB370B-20191101_45_D1	Drosophila melanogaster	20x	w; 13F02-p65ADZp in attP40; 41C07-ZpGdbd in attP2
MB399B	20191101_45_A3	A01	Wed Nov 13 16:22:06 EST 2019	202611	asoy_ss_screen_review	UAS_Chrimson_Venus_X_0070	Rubin		Sample#2734602851387965538	m			GMR_MB399B	GMR_MB399B-20191101_45_A3	Drosophila melanogaster	20x	w; 21D02-p65ADZp in attP40/CyO; 22C12-ZpGdbd in attP2/TM6B
MB399B	20191101_45_C1	A01	Wed Nov 13 16:22:06 EST 2019	202611	asoy_ss_screen_review	UAS_Chrimson_Venus_X_0070	Rubin		Sample#2734602852809834594	f			GMR_MB399B	GMR_MB399B-20191101_45_C1	Drosophila melanogaster	20x	w; 21D02-p65ADZp in attP40/CyO; 22C12-ZpGdbd in attP2/TM6B
MB408B	20230112_42_A4	A01	Tue Jan 24 16:08:06 EST 2023	253252	asoy_ss_screen_review	UAS_Chrimson_Venus_X_0070	Aso	attP40; attP2	Sample#3157868357215060066	f	Aso	Yoshi Aso	GMR_MB408B	GMR_MB408B-20230112_42_A4	Drosophila melanogaster	20x	w; 24H02-p65ADZp in attP40; 43C10-ZpGdbd in attP2
MB408B	20230112_42_C1	A01	Tue Jan 24 16:08:06 EST 2023	253252	asoy_ss_screen_review	UAS_Chrimson_Venus_X_0070	Aso	attP40; attP2	Sample#3157868358217498722	m	Aso	Yoshi Aso	GMR_MB408B	GMR_MB408B-20230112_42_C1	Drosophila melanogaster	20x	w; 24H02-p65ADZp in attP40; 43C10-ZpGdbd in attP2
MB417B	20191101_45_B2	A01	Wed Nov 13 16:22:06 EST 2019	202605	asoy_ss_screen_review	UAS_Chrimson_Venus_X_0070	Rubin		Sample#2734602852168106082	m			GMR_MB417B	GMR_MB417B-20191101_45_B2	Drosophila melanogaster	20x	w; 26E07-p65ADZp in attP40/CyO; 29G11-ZpGdbd in attP2
MB417B	20191101_45_C6	A01	Wed Nov 13 16:22:06 EST 2019	202605	asoy_ss_screen_review	UAS_Chrimson_Venus_X_0070	Rubin		Sample#2734602853585780834	f			GMR_MB417B	GMR_MB417B-20191101_45_C6	Drosophila melanogaster	20x	w; 26E07-p65ADZp in attP40/CyO; 29G11-ZpGdbd in attP2
MB418B	20191101_45_B1	A01	Wed Nov 13 16:22:06 EST 2019	202606	asoy_ss_screen_review	UAS_Chrimson_Venus_X_0070	Rubin		Sample#2734602852012916834	m			GMR_MB418B	GMR_MB418B-20191101_45_B1	Drosophila melanogaster	20x	w; 26E07-p65ADZp in attP40/CyO; 30F02-ZpGdbd in attP2
MB418B	20191101_45_C5	A01	Wed Nov 13 16:22:06 EST 2019	202606	asoy_ss_screen_review	UAS_Chrimson_Venus_X_0070	Rubin		Sample#2734602853426397282	f			GMR_MB418B	GMR_MB418B-20191101_45_C5	Drosophila melanogaster	20x	w; 26E07-p65ADZp in attP40/CyO; 30F02-ZpGdbd in attP2
MB419B	20191101_45_A6	A01	Wed Nov 13 16:22:06 EST 2019	202607	asoy_ss_screen_review	UAS_Chrimson_Venus_X_0070	Rubin		Sample#2734602851857727586	m			GMR_MB419B	GMR_MB419B-20191101_45_A6	Drosophila melanogaster	20x	w; 26E07-p65ADZp in attP40/CyO; 39A11-ZpGdbd in attP2
MB419B	20191101_45_C4	A01	Wed Nov 13 16:22:06 EST 2019	202607	asoy_ss_screen_review	UAS_Chrimson_Venus_X_0070	Rubin		Sample#2734602853271208034	f			GMR_MB419B	GMR_MB419B-20191101_45_C4	Drosophila melanogaster	20x	w; 26E07-p65ADZp in attP40/CyO; 39A11-ZpGdbd in attP2
MB433B	20191101_45_A5	A01	Wed Nov 13 16:22:06 EST 2019	202608	asoy_ss_screen_review	UAS_Chrimson_Venus_X_0070	Rubin		Sample#2734602851698344034	m			GMR_MB433B	GMR_MB433B-20191101_45_A5	Drosophila melanogaster	20x	w; 30E08-p65ADZp in attP40/CyO; 11C07-ZpGdbd in attP2/TM6B
MB433B	20191101_45_C3	A01	Wed Nov 13 16:22:06 EST 2019	202608	asoy_ss_screen_review	UAS_Chrimson_Venus_X_0070	Rubin		Sample#2734602853116018786	f			GMR_MB433B	GMR_MB433B-20191101_45_C3	Drosophila melanogaster	20x	w; 30E08-p65ADZp in attP40/CyO; 11C07-ZpGdbd in attP2/TM6B
MB434B	20191101_45_A4	A01	Wed Nov 13 16:22:06 EST 2019	202609	asoy_ss_screen_review	UAS_Chrimson_Venus_X_0070	Rubin		Sample#2734602851543154786	m			GMR_MB434B	GMR_MB434B-20191101_45_A4	Drosophila melanogaster	20x	w; 30E08-p65ADZp in attP40/CyO; 53C10-ZpGdbd in attP2
MB434B	20191101_45_C2	A01	Wed Nov 13 16:22:06 EST 2019	202609	asoy_ss_screen_review	UAS_Chrimson_Venus_X_0070	Rubin		Sample#2734602852965023842	f			GMR_MB434B	GMR_MB434B-20191101_45_C2	Drosophila melanogaster	20x	w; 30E08-p65ADZp in attP40/CyO; 53C10-ZpGdbd in attP2
MB441B	20191108_46_A1	A01	Tue Nov 26 14:32:47 EST 2019	203114	asoy_ss_screen_review	UAS_Chrimson_Venus_X_0070	Rubin		Sample#2739286383280521314	m			GMR_MB441B	GMR_MB441B-20191108_46_A1	Drosophila melanogaster	20x	w; 30G08-p65ADZp in attP40/CyO; 48B03-ZpGdbd in attP2
MB441B	20191108_46_B6	A01	Tue Nov 26 14:32:47 EST 2019	203114	asoy_ss_screen_review	UAS_Chrimson_Venus_X_0070	Rubin		Sample#2739286385159569506	f			GMR_MB441B	GMR_MB441B-20191108_46_B6	Drosophila melanogaster	20x	w; 30G08-p65ADZp in attP40/CyO; 48B03-ZpGdbd in attP2
MB463B	20191108_46_A6	A01	Tue Nov 26 14:32:47 EST 2019	203121	asoy_ss_screen_review	UAS_Chrimson_Venus_X_0070	Rubin		Sample#2739286384236822626	m			GMR_MB463B	GMR_MB463B-20191108_46_A6	Drosophila melanogaster	20x	w; 35B12-p65ADZp in attP40/CyO; 34A03-ZpGdbd in attP2/TM6B
MB463B	20191108_46_C5	A01	Tue Nov 26 14:32:47 EST 2019	203121	asoy_ss_screen_review	UAS_Chrimson_Venus_X_0070	Rubin		Sample#2739286386027790434	f			GMR_MB463B	GMR_MB463B-20191108_46_C5	Drosophila melanogaster	20x	w; 35B12-p65ADZp in attP40/CyO; 34A03-ZpGdbd in attP2/TM6B
MB477B	20191108_46_A5	A01	Tue Nov 26 14:32:47 EST 2019	203119	asoy_ss_screen_review	UAS_Chrimson_Venus_X_0070	Rubin		Sample#2739286384052273250	m			GMR_MB477B	GMR_MB477B-20191108_46_A5	Drosophila melanogaster	20x	w; 44E04-p65ADZp in attP40; 26E07-ZpGdbd in attP2
MB477B	20191108_46_C4	A01	Tue Nov 26 14:32:47 EST 2019	203119	asoy_ss_screen_review	UAS_Chrimson_Venus_X_0070	Rubin		Sample#2739286385851629666	f			GMR_MB477B	GMR_MB477B-20191108_46_C4	Drosophila melanogaster	20x	w; 44E04-p65ADZp in attP40; 26E07-ZpGdbd in attP2
MB485B	20230112_42_A5	A01	Tue Jan 24 16:08:06 EST 2023	253253	asoy_ss_screen_review	UAS_Chrimson_Venus_X_0070	Aso	attP40; attP2	Sample#3157868357328306274	f	Aso	Yoshi Aso	GMR_MB485B	GMR_MB485B-20230112_42_A5	Drosophila melanogaster	20x	w[1118]; P{y[+t7.7] w[+mC]=R48H12-p65.AD}attP40/CyO; P{y[+t7.7] w[+mC]=R37E06-GAL4.DBD}attP2
MB485B	20230112_42_C2	A01	Tue Jan 24 16:08:06 EST 2023	253253	asoy_ss_screen_review	UAS_Chrimson_Venus_X_0070	Aso	attP40; attP2	Sample#3157868358330744930	m	Aso	Yoshi Aso	GMR_MB485B	GMR_MB485B-20230112_42_C2	Drosophila melanogaster	20x	w[1118]; P{y[+t7.7] w[+mC]=R48H12-p65.AD}attP40/CyO; P{y[+t7.7] w[+mC]=R37E06-GAL4.DBD}attP2
MB542B	20191108_46_B1	A01	Tue Nov 26 14:32:47 EST 2019	203123	asoy_ss_screen_review	UAS_Chrimson_Venus_X_0070	Rubin		Sample#2739286384421372002	m			GMR_MB542B	GMR_MB542B-20191108_46_B1	Drosophila melanogaster	20x	w; 65B09-p65ADZp in attP40; 51D04-ZpGdbd in attP2
MB542B	20191108_46_C6	A01	Tue Nov 26 14:32:47 EST 2019	203123	asoy_ss_screen_review	UAS_Chrimson_Venus_X_0070	Rubin		Sample#2739286386212339810	f			GMR_MB542B	GMR_MB542B-20191108_46_C6	Drosophila melanogaster	20x	w; 65B09-p65ADZp in attP40; 51D04-ZpGdbd in attP2
MB546B	20200710_41_A4	A01	Sat Jul 25 05:57:36 EDT 2020	212401	asoy_ss_screen_review	UAS_Chrimson_Venus_X_0070	Rubin	attP40; attP2	Sample#2826839498862624866	f			GMR_MB546B	GMR_MB546B-20200710_41_A4	Drosophila melanogaster	20x	w; 65G01-p65ADZp in attP40/CyO::Tb-RFP; 82D04-ZpGdbd in attP2
MB546B	20200710_42_A3	A01	Fri Jul 24 14:16:39 EDT 2020	212401	asoy_ss_screen_review	UAS_Chrimson_Venus_X_0070	Rubin	attP40; attP2	Sample#2826602701456932962	m			GMR_MB546B	GMR_MB546B-20200710_42_A3	Drosophila melanogaster	20x	w; 65G01-p65ADZp in attP40/CyO::Tb-RFP; 82D04-ZpGdbd in attP2
MB549B	20191108_46_A2	A01	Tue Nov 26 14:32:47 EST 2019	203115	asoy_ss_screen_review	UAS_Chrimson_Venus_X_0070	Rubin		Sample#2739286383502819426	m			GMR_MB549B	GMR_MB549B-20191108_46_A2	Drosophila melanogaster	20x	w; 71D08-p65ADZp in attP40; 49C12-ZpGdbd in attP2
MB549B	20191108_46_C1	A01	Tue Nov 26 14:32:47 EST 2019	203115	asoy_ss_screen_review	UAS_Chrimson_Venus_X_0070	Rubin		Sample#2739286385344118882	f			GMR_MB549B	GMR_MB549B-20191108_46_C1	Drosophila melanogaster	20x	w; 71D08-p65ADZp in attP40; 49C12-ZpGdbd in attP2
MB549C	20191108_46_B2	A01	Tue Nov 26 14:32:47 EST 2019	203124	asoy_ss_screen_review	UAS_Chrimson_Venus_X_0070	Rubin		Sample#2739286384610115682	m			GMR_MB549C	GMR_MB549C-20191108_46_B2	Drosophila melanogaster	20x	w;; 71D08-p65ADZp in VK00027; 49C12-ZpGdbd in attP2/TM6B
MB549C	20191108_46_D1	A01	Tue Nov 26 14:32:47 EST 2019	203124	asoy_ss_screen_review	UAS_Chrimson_Venus_X_0070	Rubin		Sample#2739286386388500578	f			GMR_MB549C	GMR_MB549C-20191108_46_D1	Drosophila melanogaster	20x	w;; 71D08-p65ADZp in VK00027; 49C12-ZpGdbd in attP2/TM6B
MB563B	20230112_42_A6	A01	Tue Jan 24 16:08:06 EST 2023	253254	asoy_ss_screen_review	UAS_Chrimson_Venus_X_0070	Aso	attP40; attP2	Sample#3157868357437358178	f	Aso	Yoshi Aso	GMR_MB563B	GMR_MB563B-20230112_42_A6	Drosophila melanogaster	20x	w; 81D09-p65ADZp in attP40; 38E07-ZpGdbd in attP2
MB563B	20230112_42_C3	A01	Tue Jan 24 16:08:07 EST 2023	253254	asoy_ss_screen_review	UAS_Chrimson_Venus_X_0070	Aso	attP40; attP2	Sample#3157868358443991138	m	Aso	Yoshi Aso	GMR_MB563B	GMR_MB563B-20230112_42_C3	Drosophila melanogaster	20x	w; 81D09-p65ADZp in attP40; 38E07-ZpGdbd in attP2
MB618B	20230112_42_B1	A01	Tue Jan 24 16:08:06 EST 2023	253255	asoy_ss_screen_review	UAS_Chrimson_Venus_X_0070	Aso	attP40; attP2	Sample#3157868357550604386	f	Aso	Yoshi Aso	GMR_MB618B	GMR_MB618B-20230112_42_B1	Drosophila melanogaster	20x	w; 65B09-p65ADZp in attP40; 53B06-ZpGdbd in attP2
MB618B	20230112_42_C4	A01	Tue Jan 24 16:08:07 EST 2023	253255	asoy_ss_screen_review	UAS_Chrimson_Venus_X_0070	Aso	attP40; attP2	Sample#3157868358557237346	m	Aso	Yoshi Aso	GMR_MB618B	GMR_MB618B-20230112_42_C4	Drosophila melanogaster	20x	w; 65B09-p65ADZp in attP40; 53B06-ZpGdbd in attP2
MB623C	20230113_42_A1	A01	Mon Jan 30 14:00:39 EST 2023	253373	asoy_ss_screen_review	UAS_Chrimson_Venus_X_0070	Aso	VK00027, attP2	Sample#3160010609613865058	f	Aso	Yoshi Aso	GMR_MB623C	GMR_MB623C-20230113_42_A1	Drosophila melanogaster	20x	w;; 13F02-p65ADZp in VK00027, VT058937-ZpGdbd in attP2
MB623C	20230113_42_D2	A01	Mon Jan 30 14:00:40 EST 2023	253373	asoy_ss_screen_review	UAS_Chrimson_Venus_X_0070	Aso	VK00027, attP2	Sample#3160010611782320226	m	Aso	Yoshi Aso	GMR_MB623C	GMR_MB623C-20230113_42_D2	Drosophila melanogaster	20x	w;; 13F02-p65ADZp in VK00027, VT058937-ZpGdbd in attP2
OL0001B	20191025_45_C5	A01	Wed Nov 06 18:36:42 EST 2019	202195	nerna_ss_screen_review	UAS_Chrimson_Venus_X_0070	Rubin	attP40; attP2	Sample#2732100012275138658	m			GMR_OL0001B	GMR_OL0001B-20191025_45_C5	Drosophila melanogaster	20x	w; 64G10-p65ADZp in attP40/CyO; 35B06-ZpGdbd in attP2
OL0001B	20191025_45_G3	A01	Wed Nov 06 18:36:43 EST 2019	202195	nerna_ss_screen_review	UAS_Chrimson_Venus_X_0070	Rubin	attP40; attP2	Sample#2732100015659941986	f			GMR_OL0001B	GMR_OL0001B-20191025_45_G3	Drosophila melanogaster	20x	w; 64G10-p65ADZp in attP40/CyO; 35B06-ZpGdbd in attP2
OL0002B	20230203_46_A1	A01	Tue Feb 14 17:18:37 EST 2023	254120	nerna_ss_screen_review	UAS_Chrimson_Venus_X_0070	Rubin	attP40; attP2	Sample#3165496248253808799	f	Rubin	Aljoscha Nern	GMR_OL0002B	GMR_OL0002B-20230203_46_A1	Drosophila melanogaster	20x	w; 75H09-p65ADZp in attP40/CyO; 35B06-ZpGdbd in attP2
OL0002B	20230203_47_A1	A01	Thu Feb 23 11:33:07 EST 2023	254120	nerna_ss_screen_review	UAS_Chrimson_Venus_X_0070	Rubin	attP40; attP2	Sample#3168670790165987487	m	Rubin	Aljoscha Nern	GMR_OL0002B	GMR_OL0002B-20230203_47_A1	Drosophila melanogaster	20x	w; 75H09-p65ADZp in attP40/CyO; 35B06-ZpGdbd in attP2
OL0003B	20191206_47_A2	A01	Thu Dec 19 09:22:06 EST 2019	205170	nerna_ss_screen_review	UAS_Chrimson_Venus_X_0070	Rubin	attP40; attP2	Sample#2747543120253026402	f			GMR_OL0003B	GMR_OL0003B-20191206_47_A2	Drosophila melanogaster	20x	w; 24A02-p65ADZp in attP40; 26A03-ZpGdbd in attP2
OL0003B	20191206_47_A5	A01	Thu Dec 19 09:22:06 EST 2019	205170	nerna_ss_screen_review	UAS_Chrimson_Venus_X_0070	Rubin	attP40; attP2	Sample#2747543120794091618	m			GMR_OL0003B	GMR_OL0003B-20191206_47_A5	Drosophila melanogaster	20x	w; 24A02-p65ADZp in attP40; 26A03-ZpGdbd in attP2
OL0004B	20191025_45_C2	A01	Wed Nov 06 18:36:42 EST 2019	202192	nerna_ss_screen_review	UAS_Chrimson_Venus_X_0070	Rubin	attP40; attP2	Sample#2732100011822153826	m			GMR_OL0004B	GMR_OL0004B-20191025_45_C2	Drosophila melanogaster	20x	w; 24A02-p65ADZp in attP40; 91B01-ZpGdbd in attP2
OL0004B	20191025_45_F6	A01	Wed Nov 06 18:36:43 EST 2019	202192	nerna_ss_screen_review	UAS_Chrimson_Venus_X_0070	Rubin	attP40; attP2	Sample#2732100015198568546	f			GMR_OL0004B	GMR_OL0004B-20191025_45_F6	Drosophila melanogaster	20x	w; 24A02-p65ADZp in attP40; 91B01-ZpGdbd in attP2
OL0005B	20191206_47_A3	A01	Thu Dec 19 09:22:06 EST 2019	205171	nerna_ss_screen_review	UAS_Chrimson_Venus_X_0070	Rubin	attP40; attP2	Sample#2747543120433381474	f			GMR_OL0005B	GMR_OL0005B-20191206_47_A3	Drosophila melanogaster	20x	w; 21D03-p65ADZp in attP40/CyO; 65C12-ZpGdbd in attP2
OL0005B	20191206_47_A6	A01	Thu Dec 19 09:22:06 EST 2019	205171	nerna_ss_screen_review	UAS_Chrimson_Venus_X_0070	Rubin	attP40; attP2	Sample#2747543120978640994	m			GMR_OL0005B	GMR_OL0005B-20191206_47_A6	Drosophila melanogaster	20x	w; 21D03-p65ADZp in attP40/CyO; 65C12-ZpGdbd in attP2
OL0006B	20230203_46_A2	A01	Tue Feb 14 17:18:37 EST 2023	254121	nerna_ss_screen_review	UAS_Chrimson_Venus_X_0070	Rubin	attP40; attP2	Sample#3165496248383832223	f	Rubin	Aljoscha Nern	GMR_OL0006B	GMR_OL0006B-20230203_46_A2	Drosophila melanogaster	20x	w; 21D03-p65ADZp in attP40/CyO; 24A03-ZpGdbd in attP2/TM6B
OL0006B	20230203_47_A2	A01	Thu Feb 23 11:33:07 EST 2023	254121	nerna_ss_screen_review	UAS_Chrimson_Venus_X_0070	Rubin	attP40; attP2	Sample#3168670790304399519	m	Rubin	Aljoscha Nern	GMR_OL0006B	GMR_OL0006B-20230203_47_A2	Drosophila melanogaster	20x	w; 21D03-p65ADZp in attP40/CyO; 24A03-ZpGdbd in attP2/TM6B
OL0007B	20191025_45_B6	A01	Wed Nov 06 18:36:42 EST 2019	202190	nerna_ss_screen_review	UAS_Chrimson_Venus_X_0070	Rubin	attP40; attP2	Sample#2732100011515969634	m			GMR_OL0007B	GMR_OL0007B-20191025_45_B6	Drosophila melanogaster	20x	w; 35D04-p65ADZp in attP40; 65B05-ZpGdbd in attP2
OL0007B	20191025_45_F4	A01	Wed Nov 06 18:36:43 EST 2019	202190	nerna_ss_screen_review	UAS_Chrimson_Venus_X_0070	Rubin	attP40; attP2	Sample#2732100014888190050	f			GMR_OL0007B	GMR_OL0007B-20191025_45_F4	Drosophila melanogaster	20x	w; 35D04-p65ADZp in attP40; 65B05-ZpGdbd in attP2
OL0008B	20191025_45_A4	A01	Wed Nov 06 18:36:42 EST 2019	202191	nerna_ss_screen_review	UAS_Chrimson_Venus_X_0070	Rubin	attP40; attP2	Sample#2732100010282844258	m			GMR_OL0008B	GMR_OL0008B-20191025_45_A4	Drosophila melanogaster	20x	w; 35D04-p65ADZp in attP40; 55F01-ZpGdbd in attP2
OL0008B	20191025_45_E2	A01	Wed Nov 06 18:36:43 EST 2019	202191	nerna_ss_screen_review	UAS_Chrimson_Venus_X_0070	Rubin	attP40; attP2	Sample#2732100013655064674	f			GMR_OL0008B	GMR_OL0008B-20191025_45_E2	Drosophila melanogaster	20x	w; 35D04-p65ADZp in attP40; 55F01-ZpGdbd in attP2
OL0009B	20230203_46_A3	A01	Tue Feb 14 17:18:37 EST 2023	254122	nerna_ss_screen_review	UAS_Chrimson_Venus_X_0070	Rubin	attP40; attP2	Sample#3165496248488689823	f	Rubin	Aljoscha Nern	GMR_OL0009B	GMR_OL0009B-20230203_46_A3	Drosophila melanogaster	20x	w; 71F06-p65ADZp in attP40; 35B06-ZpGdbd in attP2
OL0009B	20230203_47_A3	A01	Thu Feb 23 11:33:07 EST 2023	254122	nerna_ss_screen_review	UAS_Chrimson_Venus_X_0070	Rubin	attP40; attP2	Sample#3168670790409257119	m	Rubin	Aljoscha Nern	GMR_OL0009B	GMR_OL0009B-20230203_47_A3	Drosophila melanogaster	20x	w; 71F06-p65ADZp in attP40; 35B06-ZpGdbd in attP2
OL0010B	20191025_45_C6	A01	Wed Nov 06 18:36:42 EST 2019	202196	nerna_ss_screen_review	UAS_Chrimson_Venus_X_0070	Rubin	attP40; attP2	Sample#2732100012430327906	m			GMR_OL0010B	GMR_OL0010B-20191025_45_C6	Drosophila melanogaster	20x	w; 92B11-p65ADZp in attP40; 82D11-ZpGdbd in attP2
OL0010B	20191025_45_G4	A01	Wed Nov 06 18:36:43 EST 2019	202196	nerna_ss_screen_review	UAS_Chrimson_Venus_X_0070	Rubin	attP40; attP2	Sample#2732100015810936930	f			GMR_OL0010B	GMR_OL0010B-20191025_45_G4	Drosophila melanogaster	20x	w; 92B11-p65ADZp in attP40; 82D11-ZpGdbd in attP2
OL0011B	20191025_45_D1	A01	Wed Nov 06 18:36:42 EST 2019	202197	nerna_ss_screen_review	UAS_Chrimson_Venus_X_0070	Rubin	attP40; attP2	Sample#2732100012581322850	m			GMR_OL0011B	GMR_OL0011B-20191025_45_D1	Drosophila melanogaster	20x	w; 82D11-p65ADZp in attP40/CyO; 92B11-ZpGdbd in attP2/TM6B
OL0011B	20191025_45_G5	A01	Wed Nov 06 18:36:43 EST 2019	202197	nerna_ss_screen_review	UAS_Chrimson_Venus_X_0070	Rubin	attP40; attP2	Sample#2732100015966126178	f			GMR_OL0011B	GMR_OL0011B-20191025_45_G5	Drosophila melanogaster	20x	w; 82D11-p65ADZp in attP40/CyO; 92B11-ZpGdbd in attP2/TM6B
OL0012B	20230203_46_A4	A01	Tue Feb 14 17:18:37 EST 2023	254123	nerna_ss_screen_review	UAS_Chrimson_Venus_X_0070	Rubin	attP40; attP2	Sample#3165496248606130335	f	Rubin	Aljoscha Nern	GMR_OL0012B	GMR_OL0012B-20230203_46_A4	Drosophila melanogaster	20x	w; 67E03-p65ADZp in attP40; 94D12-ZpGdbd in attP2
OL0012B	20230203_47_A4	A01	Thu Feb 23 11:33:07 EST 2023	254123	nerna_ss_screen_review	UAS_Chrimson_Venus_X_0070	Rubin	attP40; attP2	Sample#3168670790526697631	m	Rubin	Aljoscha Nern	GMR_OL0012B	GMR_OL0012B-20230203_47_A4	Drosophila melanogaster	20x	w; 67E03-p65ADZp in attP40; 94D12-ZpGdbd in attP2
OL0014B	20220520_46_A1	A01	Tue Jun 07 15:05:07 EDT 2022	246486	nerna_ss_screen_review	UAS_Chrimson_Venus_X_0070	Rubin	attP40; attP2	Sample#3074125810265751650	f	Rubin	Aljoscha Nern	GMR_OL0014B	GMR_OL0014B-20220520_46_A1	Drosophila melanogaster	20x	w; 67E03-p65ADZp in attP40; 09C12-ZpGdbd in attP2
OL0014B	20220520_46_C3	A01	Tue Jun 07 15:08:38 EDT 2022	246486	nerna_ss_screen_review	UAS_Chrimson_Venus_X_0070	Rubin	attP40; attP2	Sample#3074126693821055074	m	Rubin	Aljoscha Nern	GMR_OL0014B	GMR_OL0014B-20220520_46_C3	Drosophila melanogaster	20x	w; 67E03-p65ADZp in attP40; 09C12-ZpGdbd in attP2
OL0015B	20191025_45_D4	A01	Wed Nov 06 18:36:43 EST 2019	202200	nerna_ss_screen_review	UAS_Chrimson_Venus_X_0070	Rubin	attP40; attP2	Sample#2732100013042696290	m			GMR_OL0015B	GMR_OL0015B-20191025_45_D4	Drosophila melanogaster	20x	w; 22H02-p65ADZp in attP40; 20G06-ZpGdbd in attP2
OL0015B	20191025_45_H2	A01	Wed Nov 06 18:36:43 EST 2019	202200	nerna_ss_screen_review	UAS_Chrimson_Venus_X_0070	Rubin	attP40; attP2	Sample#2732100016427499618	f			GMR_OL0015B	GMR_OL0015B-20191025_45_H2	Drosophila melanogaster	20x	w; 22H02-p65ADZp in attP40; 20G06-ZpGdbd in attP2
OL0017B	20191025_45_D2	A01	Wed Nov 06 18:36:43 EST 2019	202198	nerna_ss_screen_review	UAS_Chrimson_Venus_X_0070	Rubin	attP40; attP2	Sample#2732100012736512098	m			GMR_OL0017B	GMR_OL0017B-20191025_45_D2	Drosophila melanogaster	20x	w; 82D11-p65ADZp in attP40/CyO; 54A05-ZpGdbd in attP2
OL0017B	20191025_45_G6	A01	Wed Nov 06 18:36:43 EST 2019	202198	nerna_ss_screen_review	UAS_Chrimson_Venus_X_0070	Rubin	attP40; attP2	Sample#2732100016121315426	f			GMR_OL0017B	GMR_OL0017B-20191025_45_G6	Drosophila melanogaster	20x	w; 82D11-p65ADZp in attP40/CyO; 54A05-ZpGdbd in attP2
OL0018B	20230203_46_A5	A01	Tue Feb 14 17:18:37 EST 2023	254124	nerna_ss_screen_review	UAS_Chrimson_Venus_X_0070	Rubin	attP40; attP2	Sample#3165496248719376543	f	Rubin	Aljoscha Nern	GMR_OL0018B	GMR_OL0018B-20230203_46_A5	Drosophila melanogaster	20x	w; 38E08-p65ADZp in attP40; 26A03-ZpGdbd in attP2
OL0018B	20230203_47_A5	A01	Thu Feb 23 11:33:07 EST 2023	254124	nerna_ss_screen_review	UAS_Chrimson_Venus_X_0070	Rubin	attP40; attP2	Sample#3168670790631555231	m	Rubin	Aljoscha Nern	GMR_OL0018B	GMR_OL0018B-20230203_47_A5	Drosophila melanogaster	20x	w; 38E08-p65ADZp in attP40; 26A03-ZpGdbd in attP2
OL0019B	20191025_45_B2	A01	Wed Nov 06 18:36:42 EST 2019	202185	nerna_ss_screen_review	UAS_Chrimson_Venus_X_0070	Rubin	attP40; attP2	Sample#2732100010899406946	m			GMR_OL0019B	GMR_OL0019B-20191025_45_B2	Drosophila melanogaster	20x	w; 35D04-p65ADZp in attP40; 22D06-ZpGdbd in attP2
OL0019B	20191025_45_E6	A01	Wed Nov 06 18:36:43 EST 2019	202185	nerna_ss_screen_review	UAS_Chrimson_Venus_X_0070	Rubin	attP40; attP2	Sample#2732100014271627362	f			GMR_OL0019B	GMR_OL0019B-20191025_45_E6	Drosophila melanogaster	20x	w; 35D04-p65ADZp in attP40; 22D06-ZpGdbd in attP2
OL0020B	20191025_45_B3	A01	Wed Nov 06 18:36:42 EST 2019	202186	nerna_ss_screen_review	UAS_Chrimson_Venus_X_0070	Rubin	attP40; attP2	Sample#2732100011054596194	m			GMR_OL0020B	GMR_OL0020B-20191025_45_B3	Drosophila melanogaster	20x	w; 35D04-p65ADZp in attP40; 80E07-ZpGdbd in attP2/TM6B
OL0020B	20191025_45_F1	A01	Wed Nov 06 18:36:43 EST 2019	202186	nerna_ss_screen_review	UAS_Chrimson_Venus_X_0070	Rubin	attP40; attP2	Sample#2732100014431010914	f			GMR_OL0020B	GMR_OL0020B-20191025_45_F1	Drosophila melanogaster	20x	w; 35D04-p65ADZp in attP40; 80E07-ZpGdbd in attP2/TM6B
OL0021B	20191025_45_C3	A01	Wed Nov 06 18:36:42 EST 2019	202193	nerna_ss_screen_review	UAS_Chrimson_Venus_X_0070	Rubin	attP40; attP2	Sample#2732100011973148770	m			GMR_OL0021B	GMR_OL0021B-20191025_45_C3	Drosophila melanogaster	20x	w; 35D04-p65ADZp in attP40; 82D11-ZpGdbd in attP2
OL0021B	20191025_45_G1	A01	Wed Nov 06 18:36:43 EST 2019	202193	nerna_ss_screen_review	UAS_Chrimson_Venus_X_0070	Rubin	attP40; attP2	Sample#2732100015353757794	f			GMR_OL0021B	GMR_OL0021B-20191025_45_G1	Drosophila melanogaster	20x	w; 35D04-p65ADZp in attP40; 82D11-ZpGdbd in attP2
OL0022B	20191025_45_D3	A01	Wed Nov 06 18:36:43 EST 2019	202199	nerna_ss_screen_review	UAS_Chrimson_Venus_X_0070	Rubin	attP40; attP2	Sample#2732100012891701346	m			GMR_OL0022B	GMR_OL0022B-20191025_45_D3	Drosophila melanogaster	20x	w; 35D04-p65ADZp in attP40; 91B01-ZpGdbd in attP2
OL0022B	20191025_45_H1	A01	Wed Nov 06 18:36:43 EST 2019	202199	nerna_ss_screen_review	UAS_Chrimson_Venus_X_0070	Rubin	attP40; attP2	Sample#2732100016272310370	f			GMR_OL0022B	GMR_OL0022B-20191025_45_H1	Drosophila melanogaster	20x	w; 35D04-p65ADZp in attP40; 91B01-ZpGdbd in attP2
OL0023B	20191025_45_B1	A01	Wed Nov 06 18:36:42 EST 2019	202184	nerna_ss_screen_review	UAS_Chrimson_Venus_X_0070	Rubin	attP40; attP2	Sample#2732100010744217698	m			GMR_OL0023B	GMR_OL0023B-20191025_45_B1	Drosophila melanogaster	20x	w; 72C08-p65ADZp in attP40/CyO; 50D07-ZpGdbd in attP2
OL0023B	20191025_45_E5	A01	Wed Nov 06 18:36:43 EST 2019	202184	nerna_ss_screen_review	UAS_Chrimson_Venus_X_0070	Rubin	attP40; attP2	Sample#2732100014116438114	f			GMR_OL0023B	GMR_OL0023B-20191025_45_E5	Drosophila melanogaster	20x	w; 72C08-p65ADZp in attP40/CyO; 50D07-ZpGdbd in attP2
OL0024B	20230421_45_B2	A01	Mon May 01 16:53:37 EDT 2023	256173	nerna_ss_screen_review	UAS_Chrimson_Venus_X_0070	Rubin	attP40; attP2	Sample#3193016333004439711	f	Rubin	Aljoscha Nern	GMR_OL0024B	GMR_OL0024B-20230421_45_B2	Drosophila melanogaster	20x	w; 22A07-p65ADZp in attP40/CyO; 91B01-ZpGdbd in attP2
OL0024B	20230421_45_D6	A01	Mon May 01 16:53:37 EDT 2023	256173	nerna_ss_screen_review	UAS_Chrimson_Venus_X_0070	Rubin	attP40; attP2	Sample#3193016335760097439	m	Rubin	Aljoscha Nern	GMR_OL0024B	GMR_OL0024B-20230421_45_D6	Drosophila melanogaster	20x	w; 22A07-p65ADZp in attP40/CyO; 91B01-ZpGdbd in attP2
OL0026B	20230203_46_B1	A01	Tue Feb 14 17:18:37 EST 2023	254126	nerna_ss_screen_review	UAS_Chrimson_Venus_X_0070	Rubin	attP40; attP2	Sample#3165496248933286047	f	Rubin	Aljoscha Nern	GMR_OL0026B	GMR_OL0026B-20230203_46_B1	Drosophila melanogaster	20x	w; 92B02-p65ADZp in attP40/CyO; 91B01-ZpGdbd in attP2
OL0026B	20230203_47_B1	A01	Thu Feb 23 11:33:07 EST 2023	254126	nerna_ss_screen_review	UAS_Chrimson_Venus_X_0070	Rubin	attP40; attP2	Sample#3168670790837076127	m	Rubin	Aljoscha Nern	GMR_OL0026B	GMR_OL0026B-20230203_47_B1	Drosophila melanogaster	20x	w; 92B02-p65ADZp in attP40/CyO; 91B01-ZpGdbd in attP2
OL0027B	20191025_45_A1	A01	Wed Nov 06 18:36:42 EST 2019	202172	nerna_ss_screen_review	UAS_Chrimson_Venus_X_0070	Rubin	attP40; attP2	Sample#2732100009813082210	m			GMR_OL0027B	GMR_OL0027B-20191025_45_A1	Drosophila melanogaster	20x	w; 14A11-p65ADZp in attP40/CyO; 50C10-ZpGdbd in attP2
OL0027B	20191025_45_E1	A01	Wed Nov 06 18:36:43 EST 2019	202172	nerna_ss_screen_review	UAS_Chrimson_Venus_X_0070	Rubin	attP40; attP2	Sample#2732100013504069730	f			GMR_OL0027B	GMR_OL0027B-20191025_45_E1	Drosophila melanogaster	20x	w; 14A11-p65ADZp in attP40/CyO; 50C10-ZpGdbd in attP2
OL0028B	20230203_46_B2	A01	Tue Feb 14 17:18:37 EST 2023	254127	nerna_ss_screen_review	UAS_Chrimson_Venus_X_0070	Rubin	attP40; attP2	Sample#3165496249038143647	f	Rubin	Aljoscha Nern	GMR_OL0028B	GMR_OL0028B-20230203_46_B2	Drosophila melanogaster	20x	w; 14A11-p65ADZp in attP40; 54A05-ZpGdbd in attP2
OL0028B	20230203_47_B2	A01	Thu Feb 23 11:33:07 EST 2023	254127	nerna_ss_screen_review	UAS_Chrimson_Venus_X_0070	Rubin	attP40; attP2	Sample#3168670790937739423	m	Rubin	Aljoscha Nern	GMR_OL0028B	GMR_OL0028B-20230203_47_B2	Drosophila melanogaster	20x	w; 14A11-p65ADZp in attP40; 54A05-ZpGdbd in attP2
OL0029B	20191025_45_A2	A01	Wed Nov 06 18:36:42 EST 2019	202173	nerna_ss_screen_review	UAS_Chrimson_Venus_X_0070	Rubin	attP40; attP2	Sample#2732100009976660066	m			GMR_OL0029B	GMR_OL0029B-20191025_45_A2	Drosophila melanogaster	20x	w; 64G09-p65ADZp in attP40; 37H04-ZpGdbd in attP2/TM6B
OL0029B	20191025_45_D5	A01	Wed Nov 06 18:36:43 EST 2019	202173	nerna_ss_screen_review	UAS_Chrimson_Venus_X_0070	Rubin	attP40; attP2	Sample#2732100013197885538	f			GMR_OL0029B	GMR_OL0029B-20191025_45_D5	Drosophila melanogaster	20x	w; 64G09-p65ADZp in attP40; 37H04-ZpGdbd in attP2/TM6B
OL0030B	20230203_46_B3	A01	Tue Feb 14 17:18:37 EST 2023	254128	nerna_ss_screen_review	UAS_Chrimson_Venus_X_0070	Rubin	attP40; attP2	Sample#3165496249138806943	f	Rubin	Aljoscha Nern	GMR_OL0030B	GMR_OL0030B-20230203_46_B3	Drosophila melanogaster	20x	w; 82D11-p65ADZp in attP40/CyO; 14A11-ZpGdbd in attP2
OL0030B	20230203_47_B3	A01	Thu Feb 23 11:33:07 EST 2023	254128	nerna_ss_screen_review	UAS_Chrimson_Venus_X_0070	Rubin	attP40; attP2	Sample#3168670791038402719	m	Rubin	Aljoscha Nern	GMR_OL0030B	GMR_OL0030B-20230203_47_B3	Drosophila melanogaster	20x	w; 82D11-p65ADZp in attP40/CyO; 14A11-ZpGdbd in attP2
OL0031B	20230421_45_B5	A01	Mon May 01 16:53:37 EDT 2023	256174	nerna_ss_screen_review	UAS_Chrimson_Venus_X_0070	Rubin	attP40; attP2	Sample#3193016333516144799	f	Rubin	Aljoscha Nern	GMR_OL0031B	GMR_OL0031B-20230421_45_B5	Drosophila melanogaster	20x	w; 47E07-p65ADZp in attP40; 14A11-ZpGdbd in attP2
OL0031B	20230421_45_E3	A01	Mon May 01 16:53:37 EDT 2023	256174	nerna_ss_screen_review	UAS_Chrimson_Venus_X_0070	Rubin	attP40; attP2	Sample#3193016336271802527	m	Rubin	Aljoscha Nern	GMR_OL0031B	GMR_OL0031B-20230421_45_E3	Drosophila melanogaster	20x	w; 47E07-p65ADZp in attP40; 14A11-ZpGdbd in attP2
OL0035B	20230203_46_B5	A01	Tue Feb 14 17:18:37 EST 2023	254130	nerna_ss_screen_review	UAS_Chrimson_Venus_X_0070	Rubin	attP40; attP2	Sample#3165496249344327839	f	Rubin	Aljoscha Nern	GMR_OL0035B	GMR_OL0035B-20230203_46_B5	Drosophila melanogaster	20x	w; 14A11-p65ADZp in attP40/CyO; 71C02-ZpGdbd in attP2
OL0035B	20230203_47_B5	A01	Thu Feb 23 11:33:07 EST 2023	254130	nerna_ss_screen_review	UAS_Chrimson_Venus_X_0070	Rubin	attP40; attP2	Sample#3168670791248117919	m	Rubin	Aljoscha Nern	GMR_OL0035B	GMR_OL0035B-20230203_47_B5	Drosophila melanogaster	20x	w; 14A11-p65ADZp in attP40/CyO; 71C02-ZpGdbd in attP2
OL0037B	20230203_46_B6	A01	Tue Feb 14 17:18:37 EST 2023	254131	nerna_ss_screen_review	UAS_Chrimson_Venus_X_0070	Rubin	attP40; attP2	Sample#3165496249449185439	f	Rubin	Aljoscha Nern	GMR_OL0037B	GMR_OL0037B-20230203_46_B6	Drosophila melanogaster	20x	w; 87D07-p65ADZp in attP40; 59B03-ZpGdbd in attP2
OL0037B	20230203_47_B6	A01	Thu Feb 23 11:33:07 EST 2023	254131	nerna_ss_screen_review	UAS_Chrimson_Venus_X_0070	Rubin	attP40; attP2	Sample#3168670791344586911	m	Rubin	Aljoscha Nern	GMR_OL0037B	GMR_OL0037B-20230203_47_B6	Drosophila melanogaster	20x	w; 87D07-p65ADZp in attP40; 59B03-ZpGdbd in attP2
OL0038B	20230203_46_C1	A01	Tue Feb 14 17:18:37 EST 2023	254132	nerna_ss_screen_review	UAS_Chrimson_Venus_X_0070	Rubin	attP40; attP2	Sample#3165496249554043039	f	Rubin	Aljoscha Nern	GMR_OL0038B	GMR_OL0038B-20230203_46_C1	Drosophila melanogaster	20x	w; 44A02-p65ADZp in attP40/CyO; 50B11-ZpGdbd in attP2
OL0038B	20230203_46_I1	A01	Tue Feb 14 17:18:38 EST 2023	254132	nerna_ss_screen_review	UAS_Chrimson_Venus_X_0070	Rubin	attP40; attP2	Sample#3165496253337305247	m	Rubin	Aljoscha Nern	GMR_OL0038B	GMR_OL0038B-20230203_46_I1	Drosophila melanogaster	20x	w; 44A02-p65ADZp in attP40/CyO; 50B11-ZpGdbd in attP2
OL0042B	20191025_45_A3	A01	Wed Nov 06 18:36:42 EST 2019	202174	nerna_ss_screen_review	UAS_Chrimson_Venus_X_0070	Rubin	attP40; attP2	Sample#2732100010131849314	m			GMR_OL0042B	GMR_OL0042B-20191025_45_A3	Drosophila melanogaster	20x	w; 26A03-p65ADZp in attP40; 24A02-ZpGdbd in attP2/TM6B
OL0042B	20191025_45_D6	A01	Wed Nov 06 18:36:43 EST 2019	202174	nerna_ss_screen_review	UAS_Chrimson_Venus_X_0070	Rubin	attP40; attP2	Sample#2732100013348880482	f			GMR_OL0042B	GMR_OL0042B-20191025_45_D6	Drosophila melanogaster	20x	w; 26A03-p65ADZp in attP40; 24A02-ZpGdbd in attP2/TM6B
OL0043B	20230203_46_C2	A01	Tue Feb 14 17:18:37 EST 2023	254133	nerna_ss_screen_review	UAS_Chrimson_Venus_X_0070	Rubin	attP40; attP2	Sample#3165496249658900639	f	Rubin	Aljoscha Nern	GMR_OL0043B	GMR_OL0043B-20230203_46_C2	Drosophila melanogaster	20x	w; 55C04-p65ADZp in attP40/CyO; 14C08-ZpGdbd in attP2/TM6B
OL0043B	20230203_46_I2	A01	Tue Feb 14 17:18:38 EST 2023	254133	nerna_ss_screen_review	UAS_Chrimson_Venus_X_0070	Rubin	attP40; attP2	Sample#3165496253446357151	m	Rubin	Aljoscha Nern	GMR_OL0043B	GMR_OL0043B-20230203_46_I2	Drosophila melanogaster	20x	w; 55C04-p65ADZp in attP40/CyO; 14C08-ZpGdbd in attP2/TM6B
OL0044B	20191025_45_C1	A01	Wed Nov 06 18:36:42 EST 2019	202189	nerna_ss_screen_review	UAS_Chrimson_Venus_X_0070	Rubin	attP40; attP2	Sample#2732100011666964578	m			GMR_OL0044B	GMR_OL0044B-20191025_45_C1	Drosophila melanogaster	20x	w; 55C04-p65ADZp in attP40/CyO; 85F11-ZpGdbd in attP2/TM6B
OL0044B	20191025_45_F5	A01	Wed Nov 06 18:36:43 EST 2019	202189	nerna_ss_screen_review	UAS_Chrimson_Venus_X_0070	Rubin	attP40; attP2	Sample#2732100015043379298	f			GMR_OL0044B	GMR_OL0044B-20191025_45_F5	Drosophila melanogaster	20x	w; 55C04-p65ADZp in attP40/CyO; 85F11-ZpGdbd in attP2/TM6B
OL0045B	20191025_45_B5	A01	Wed Nov 06 18:36:42 EST 2019	202181	nerna_ss_screen_review	UAS_Chrimson_Venus_X_0070	Rubin	attP40; attP2	Sample#2732100011360780386	m			GMR_OL0045B	GMR_OL0045B-20191025_45_B5	Drosophila melanogaster	20x	w; 55C04-p65ADZp in attP40/CyO; 41C05-ZpGdbd in attP2
OL0045B	20191025_45_F3	A01	Wed Nov 06 18:36:43 EST 2019	202181	nerna_ss_screen_review	UAS_Chrimson_Venus_X_0070	Rubin	attP40; attP2	Sample#2732100014733000802	f			GMR_OL0045B	GMR_OL0045B-20191025_45_F3	Drosophila melanogaster	20x	w; 55C04-p65ADZp in attP40/CyO; 41C05-ZpGdbd in attP2
OL0046B	20191206_47_A1	A01	Thu Dec 19 09:22:06 EST 2019	205169	nerna_ss_screen_review	UAS_Chrimson_Venus_X_0070	Rubin	attP40; attP2	Sample#2747543119959425122	f			GMR_OL0046B	GMR_OL0046B-20191206_47_A1	Drosophila melanogaster	20x	w; 26A03-p65ADZp in attP40; 54A05-ZpGdbd in attP2
OL0046B	20191206_47_A4	A01	Thu Dec 19 09:22:06 EST 2019	205169	nerna_ss_screen_review	UAS_Chrimson_Venus_X_0070	Rubin	attP40; attP2	Sample#2747543120613736546	m			GMR_OL0046B	GMR_OL0046B-20191206_47_A4	Drosophila melanogaster	20x	w; 26A03-p65ADZp in attP40; 54A05-ZpGdbd in attP2
OL0047B	20191025_45_A6	A01	Wed Nov 06 18:36:42 EST 2019	202183	nerna_ss_screen_review	UAS_Chrimson_Venus_X_0070	Rubin	attP40; attP2	Sample#2732100010593222754	m			GMR_OL0047B	GMR_OL0047B-20191025_45_A6	Drosophila melanogaster	20x	w; 19G02-p65ADZp in attP40; 12E04-ZpGdbd in attP2/TM6B
OL0047B	20191025_45_E4	A01	Wed Nov 06 18:36:43 EST 2019	202183	nerna_ss_screen_review	UAS_Chrimson_Venus_X_0070	Rubin	attP40; attP2	Sample#2732100013961248866	f			GMR_OL0047B	GMR_OL0047B-20191025_45_E4	Drosophila melanogaster	20x	w; 19G02-p65ADZp in attP40; 12E04-ZpGdbd in attP2/TM6B
OL0048B	20191101_45_A1	A01	Wed Nov 13 16:04:05 EST 2019	202610	nerna_ss_screen_review	UAS_Chrimson_Venus_X_0070	Rubin	attP40; attP2	Sample#2734598319832563810	m			GMR_OL0048B	GMR_OL0048B-20191101_45_A1	Drosophila melanogaster	20x	w; 19G02-p65ADZp in attP40; 75G12-ZpGdbd in attP2
OL0048B	20191101_45_B5	A01	Wed Nov 13 16:04:05 EST 2019	202610	nerna_ss_screen_review	UAS_Chrimson_Venus_X_0070	Rubin	attP40; attP2	Sample#2734598320021307490	f			GMR_OL0048B	GMR_OL0048B-20191101_45_B5	Drosophila melanogaster	20x	w; 19G02-p65ADZp in attP40; 75G12-ZpGdbd in attP2
OL0070B	20191115_47_A2	A01	Tue Dec 03 18:53:42 EST 2019	203653	nerna_ss_screen_review	UAS_Chrimson_Venus_X_0070	Rubin	attP40; attP2	Sample#2741888761003507810	m			GMR_OL0070B	GMR_OL0070B-20191115_47_A2	Drosophila melanogaster	20x	w; 91B01-p65ADZp in attP40; 22A07-ZpGdbd in attP2
OL0070B	20191115_47_C2	A01	Tue Dec 03 18:53:42 EST 2019	203653	nerna_ss_screen_review	UAS_Chrimson_Venus_X_0070	Rubin	attP40; attP2	Sample#2741888762731561058	f			GMR_OL0070B	GMR_OL0070B-20191115_47_C2	Drosophila melanogaster	20x	w; 91B01-p65ADZp in attP40; 22A07-ZpGdbd in attP2
OL0071B	20191115_47_A3	A01	Tue Dec 03 18:53:42 EST 2019	203654	nerna_ss_screen_review	UAS_Chrimson_Venus_X_0070	Rubin	attP40; attP2	Sample#2741888761196445794	m			GMR_OL0071B	GMR_OL0071B-20191115_47_A3	Drosophila melanogaster	20x	w; 91B01-p65ADZp in attP40/CyO::Tb-RFP; 41C07-ZpGdbd in attP2/TM6B
OL0071B	20191115_47_C3	A01	Tue Dec 03 18:53:42 EST 2019	203654	nerna_ss_screen_review	UAS_Chrimson_Venus_X_0070	Rubin	attP40; attP2	Sample#2741888762924499042	f			GMR_OL0071B	GMR_OL0071B-20191115_47_C3	Drosophila melanogaster	20x	w; 91B01-p65ADZp in attP40/CyO::Tb-RFP; 41C07-ZpGdbd in attP2/TM6B
OL0077B	20191115_47_A1	A01	Tue Dec 03 18:53:42 EST 2019	203652	nerna_ss_screen_review	UAS_Chrimson_Venus_X_0070	Rubin	attP40; attP2	Sample#2741888760785404002	m			GMR_OL0077B	GMR_OL0077B-20191115_47_A1	Drosophila melanogaster	20x	w; 92B02-p65ADZp in attP40; 41C07-ZpGdbd in attP2
OL0077B	20191115_47_C1	A01	Tue Dec 03 18:53:42 EST 2019	203652	nerna_ss_screen_review	UAS_Chrimson_Venus_X_0070	Rubin	attP40; attP2	Sample#2741888762538623074	f			GMR_OL0077B	GMR_OL0077B-20191115_47_C1	Drosophila melanogaster	20x	w; 92B02-p65ADZp in attP40; 41C07-ZpGdbd in attP2
OL0081B	20191115_47_A4	A01	Tue Dec 03 18:53:42 EST 2019	203655	nerna_ss_screen_review	UAS_Chrimson_Venus_X_0070	Rubin	attP40; attP2	Sample#2741888761385189474	m			GMR_OL0081B	GMR_OL0081B-20191115_47_A4	Drosophila melanogaster	20x	w; 47E07-p65ADZp in attP40; 41C07-ZpGdbd in attP2
OL0081B	20191115_47_C4	A01	Tue Dec 03 18:53:42 EST 2019	203655	nerna_ss_screen_review	UAS_Chrimson_Venus_X_0070	Rubin	attP40; attP2	Sample#2741888763121631330	f			GMR_OL0081B	GMR_OL0081B-20191115_47_C4	Drosophila melanogaster	20x	w; 47E07-p65ADZp in attP40; 41C07-ZpGdbd in attP2
OL0087B	20191115_47_A5	A01	Tue Dec 03 18:53:42 EST 2019	203656	nerna_ss_screen_review	UAS_Chrimson_Venus_X_0070	Rubin	attP40; attP2	Sample#2741888761569738850	m			GMR_OL0087B	GMR_OL0087B-20191115_47_A5	Drosophila melanogaster	20x	w; 82D11-p65ADZp in attP40/CyO; 41C07-ZpGdbd in attP2
OL0087B	20191115_47_C5	A01	Tue Dec 03 18:53:43 EST 2019	203656	nerna_ss_screen_review	UAS_Chrimson_Venus_X_0070	Rubin	attP40; attP2	Sample#2741888763314569314	f			GMR_OL0087B	GMR_OL0087B-20191115_47_C5	Drosophila melanogaster	20x	w; 82D11-p65ADZp in attP40/CyO; 41C07-ZpGdbd in attP2
OL0092C	20191115_47_B1	A01	Tue Dec 03 18:53:42 EST 2019	203658	nerna_ss_screen_review	UAS_Chrimson_Venus_X_0070	Rubin	VK00027, attP2	Sample#2741888761955614818	m			GMR_OL0092C	GMR_OL0092C-20191115_47_B1	Drosophila melanogaster	20x	w;; 92B02-p65ADZp in VK00027, 38E08-ZpGdbd in attP2
OL0092C	20191115_47_D1	A01	Tue Dec 03 18:53:43 EST 2019	203658	nerna_ss_screen_review	UAS_Chrimson_Venus_X_0070	Rubin	VK00027, attP2	Sample#2741888763696250978	f			GMR_OL0092C	GMR_OL0092C-20191115_47_D1	Drosophila melanogaster	20x	w;; 92B02-p65ADZp in VK00027, 38E08-ZpGdbd in attP2
OL0202B	20191115_47_B3	A01	Tue Dec 03 18:53:42 EST 2019	203660	nerna_ss_screen_review	UAS_Chrimson_Venus_X_0070	Rubin	attP40; attP2	Sample#2741888762345685090	m			GMR_OL0202B	GMR_OL0202B-20191115_47_B3	Drosophila melanogaster	20x	w; 42E06-p65ADZp in attP40; VT019053-ZpGdbd in attP2
OL0202B	20191115_47_D3	A01	Tue Dec 03 18:53:43 EST 2019	203660	nerna_ss_screen_review	UAS_Chrimson_Venus_X_0070	Rubin	attP40; attP2	Sample#2741888764086321250	f			GMR_OL0202B	GMR_OL0202B-20191115_47_D3	Drosophila melanogaster	20x	w; 42E06-p65ADZp in attP40; VT019053-ZpGdbd in attP2
OL0203B	20191115_47_A6	A01	Tue Dec 03 18:53:42 EST 2019	203657	nerna_ss_screen_review	UAS_Chrimson_Venus_X_0070	Rubin	attP40; attP2	Sample#2741888761762676834	m			GMR_OL0203B	GMR_OL0203B-20191115_47_A6	Drosophila melanogaster	20x	w; 42E06-p65ADZp in attP40/CyO; VT022290-ZpGdbd in attP2
OL0203B	20191115_47_C6	A01	Tue Dec 03 18:53:43 EST 2019	203657	nerna_ss_screen_review	UAS_Chrimson_Venus_X_0070	Rubin	attP40; attP2	Sample#2741888763503312994	f			GMR_OL0203B	GMR_OL0203B-20191115_47_C6	Drosophila melanogaster	20x	w; 42E06-p65ADZp in attP40/CyO; VT022290-ZpGdbd in attP2
OL0218B	20191115_47_B2	A01	Tue Dec 03 18:53:42 EST 2019	203659	nerna_ss_screen_review	UAS_Chrimson_Venus_X_0070	Rubin	attP40; attP2	Sample#2741888762148552802	m			GMR_OL0218B	GMR_OL0218B-20191115_47_B2	Drosophila melanogaster	20x	w; 47E07-p65ADZp in attP40; VT049344-ZpGdbd in attP2
OL0218B	20191115_47_D2	A01	Tue Dec 03 18:53:43 EST 2019	203659	nerna_ss_screen_review	UAS_Chrimson_Venus_X_0070	Rubin	attP40; attP2	Sample#2741888763893383266	f			GMR_OL0218B	GMR_OL0218B-20191115_47_D2	Drosophila melanogaster	20x	w; 47E07-p65ADZp in attP40; VT049344-ZpGdbd in attP2
SS00026	20230317_43_B5	A01	Wed Mar 29 15:31:09 EDT 2023	255004	wolfft_ss_screen_review	UAS_Chrimson_Venus_X_0070	Rubin	attP40; attP2	Sample#3181036782653276319	f	Rubin	Tanya Wolff	GMR_SS00026	GMR_SS00026-20230317_43_B5	Drosophila melanogaster	20x	w; 38C04-p65ADZp in attP40; 17H12-ZpGdbd in attP2
SS00026	20230317_44_A1	A01	Thu Mar 30 15:34:39 EDT 2023	255004	wolfft_ss_screen_review	UAS_Chrimson_Venus_X_0070	Rubin	attP40; attP2	Sample#3181400048684499103	m	Rubin	Tanya Wolff	GMR_SS00026	GMR_SS00026-20230317_44_A1	Drosophila melanogaster	20x	w; 38C04-p65ADZp in attP40; 17H12-ZpGdbd in attP2
SS00043	20191025_46_A1	A01	Wed Nov 06 17:55:10 EST 2019	202175	wolfft_ss_screen_review	UAS_Chrimson_Venus_X_0070	Rubin		Sample#2732089560086347874	f			GMR_SS00043	GMR_SS00043-20191025_46_A1	Drosophila melanogaster	20x	w; 65B12-p65ADZp in attP40; 30E10-ZpGdbd in attP2
SS00043	20191025_46_A4	A01	Wed Nov 06 17:55:11 EST 2019	202175	wolfft_ss_screen_review	UAS_Chrimson_Venus_X_0070	Rubin		Sample#2732089560598052962	m			GMR_SS00043	GMR_SS00043-20191025_46_A4	Drosophila melanogaster	20x	w; 65B12-p65ADZp in attP40; 30E10-ZpGdbd in attP2
SS00045	20230317_43_C1	A01	Wed Mar 29 15:31:09 EDT 2023	255006	wolfft_ss_screen_review	UAS_Chrimson_Venus_X_0070	Rubin	attP40; attP2	Sample#3181036782862991519	f	Rubin	Tanya Wolff	GMR_SS00045	GMR_SS00045-20230317_43_C1	Drosophila melanogaster	20x	w; 72G03-p65ADZp in attP40; 14C07-ZpGdbd in attP2
SS00045	20230317_44_A3	A01	Thu Mar 30 15:34:39 EDT 2023	255006	wolfft_ss_screen_review	UAS_Chrimson_Venus_X_0070	Rubin	attP40; attP2	Sample#3181400048940351647	m	Rubin	Tanya Wolff	GMR_SS00045	GMR_SS00045-20230317_44_A3	Drosophila melanogaster	20x	w; 72G03-p65ADZp in attP40; 14C07-ZpGdbd in attP2
SS00057	20230317_43_C2	A01	Wed Mar 29 15:31:09 EDT 2023	255007	wolfft_ss_screen_review	UAS_Chrimson_Venus_X_0070	Rubin	attP40; attP2	Sample#3181036782967849119	f	Rubin	Tanya Wolff	GMR_SS00057	GMR_SS00057-20230317_43_C2	Drosophila melanogaster	20x	w; 12C04-p65ADZp in attP40; 32A11-ZpGdbd in attP2
SS00057	20230317_44_A4	A01	Thu Mar 30 15:34:39 EDT 2023	255007	wolfft_ss_screen_review	UAS_Chrimson_Venus_X_0070	Rubin	attP40; attP2	Sample#3181400049053597855	m	Rubin	Tanya Wolff	GMR_SS00057	GMR_SS00057-20230317_44_A4	Drosophila melanogaster	20x	w; 12C04-p65ADZp in attP40; 32A11-ZpGdbd in attP2
SS00070	20220415_45_B3	A01	Mon May 02 17:19:07 EDT 2022	245554	rubing_ss_screen_review	UAS_Chrimson_Venus_X_0070	Rubin	attP40; attP2	Sample#3061113568016466018	f	Rubin	Gerry Rubin	GMR_SS00070	GMR_SS00070-20220415_45_B3	Drosophila melanogaster	20x	w; 15A05-p65ADZp in attP40/CyO; 48H04-ZpGdbd in attP2
SS00070	20220415_45_D3	A01	Mon May 02 17:19:07 EDT 2022	245554	rubing_ss_screen_review	UAS_Chrimson_Venus_X_0070	Rubin	attP40; attP2	Sample#3061113569283145826	m	Rubin	Gerry Rubin	GMR_SS00070	GMR_SS00070-20220415_45_D3	Drosophila melanogaster	20x	w; 15A05-p65ADZp in attP40/CyO; 48H04-ZpGdbd in attP2
SS00078	20191025_46_A3	A01	Wed Nov 06 17:55:10 EST 2019	202177	wolfft_ss_screen_review	UAS_Chrimson_Venus_X_0070	Rubin		Sample#2732089560430280802	f			GMR_SS00078	GMR_SS00078-20191025_46_A3	Drosophila melanogaster	20x	w; 16D01-p65ADZp in attP40; 15E01-ZpGdbd in attP2
SS00078	20191025_46_A6	A01	Wed Nov 06 17:55:11 EST 2019	202177	wolfft_ss_screen_review	UAS_Chrimson_Venus_X_0070	Rubin		Sample#2732089560925208674	m			GMR_SS00078	GMR_SS00078-20191025_46_A6	Drosophila melanogaster	20x	w; 16D01-p65ADZp in attP40; 15E01-ZpGdbd in attP2
SS00090	20191025_46_A2	A01	Wed Nov 06 17:55:10 EST 2019	202176	wolfft_ss_screen_review	UAS_Chrimson_Venus_X_0070	Rubin		Sample#2732089560270897250	f			GMR_SS00090	GMR_SS00090-20191025_46_A2	Drosophila melanogaster	20x	w; 19G02-p65ADZp in attP40; 15C03-ZpGdbd in attP2
SS00090	20191025_46_A5	A01	Wed Nov 06 17:55:11 EST 2019	202176	wolfft_ss_screen_review	UAS_Chrimson_Venus_X_0070	Rubin		Sample#2732089560761630818	m			GMR_SS00090	GMR_SS00090-20191025_46_A5	Drosophila melanogaster	20x	w; 19G02-p65ADZp in attP40; 15C03-ZpGdbd in attP2
SS00098	20210702_50_A3	A01	Thu Jul 15 15:08:08 EDT 2021	230996	wolfft_ss_screen_review	UAS_Chrimson_Venus_X_0070	Rubin	attP40; attP2	Sample#2955625738767695970	f	Rubin	Tanya Wolff	GMR_SS00098	GMR_SS00098-20210702_50_A3	Drosophila melanogaster	20x	w; 19G02-p65ADZp in attP40; 93G12-ZpGdbd in attP2
SS00098	20210702_50_C6	A01	Thu Jul 15 15:08:09 EDT 2021	230996	wolfft_ss_screen_review	UAS_Chrimson_Venus_X_0070	Rubin	attP40; attP2	Sample#2955625739015159906	m	Rubin	Tanya Wolff	GMR_SS00098	GMR_SS00098-20210702_50_C6	Drosophila melanogaster	20x	w; 19G02-p65ADZp in attP40; 93G12-ZpGdbd in attP2
SS00118	20221111_43_B5	A01	Tue Nov 29 11:55:47 EST 2022	251713	wolfft_ss_screen_review	UAS_Chrimson_Venus_X_0070	Rubin	attP40; attP2	Sample#3137511137843609698	f	Rubin	Tanya Wolff	GMR_SS00118	GMR_SS00118-20221111_43_B5	Drosophila melanogaster	20x	w[1118]; P{y[+t7.7] w[+mC]=R24A02-p65.AD}attP40; P{y[+t7.7] w[+mC]=R30G06-GAL4.DBD}attP2
SS00118	20221111_43_G1	A01	Tue Nov 29 11:55:47 EST 2022	251713	wolfft_ss_screen_review	UAS_Chrimson_Venus_X_0070	Rubin	attP40; attP2	Sample#3137511138661498978	m	Rubin	Tanya Wolff	GMR_SS00118	GMR_SS00118-20221111_43_G1	Drosophila melanogaster	20x	w[1118]; P{y[+t7.7] w[+mC]=R24A02-p65.AD}attP40; P{y[+t7.7] w[+mC]=R30G06-GAL4.DBD}attP2
SS00153	20221111_43_D1	A01	Tue Nov 29 11:55:47 EST 2022	251717	wolfft_ss_screen_review	UAS_Chrimson_Venus_X_0070	Rubin	attP40; attP2	Sample#3137511138929934434	f	Rubin	Tanya Wolff	GMR_SS00153	GMR_SS00153-20221111_43_D1	Drosophila melanogaster	20x	w; 37H01-p65ADZp in attP40; 38G02-ZpGdbd in attP2
SS00153	20221111_43_G5	A01	Tue Nov 29 11:55:47 EST 2022	251717	wolfft_ss_screen_review	UAS_Chrimson_Venus_X_0070	Rubin	attP40; attP2	Sample#3137511139059957858	m	Rubin	Tanya Wolff	GMR_SS00153	GMR_SS00153-20221111_43_G5	Drosophila melanogaster	20x	w; 37H01-p65ADZp in attP40; 38G02-ZpGdbd in attP2
SS00189	20230317_43_C3	A01	Wed Mar 29 15:31:09 EDT 2023	255008	wolfft_ss_screen_review	UAS_Chrimson_Venus_X_0070	Rubin	attP40; attP2	Sample#3181036783072706719	f	Rubin	Tanya Wolff	GMR_SS00189	GMR_SS00189-20230317_43_C3	Drosophila melanogaster	20x	w; 38G07-p65ADZp in attP40/CyO; 18G01-ZpGdbd in attP2
SS00189	20230317_44_A5	A01	Thu Mar 30 15:34:39 EDT 2023	255008	wolfft_ss_screen_review	UAS_Chrimson_Venus_X_0070	Rubin	attP40; attP2	Sample#3181400049162649759	m	Rubin	Tanya Wolff	GMR_SS00189	GMR_SS00189-20230317_44_A5	Drosophila melanogaster	20x	w; 38G07-p65ADZp in attP40/CyO; 18G01-ZpGdbd in attP2
SS00191	20191122_47_B1	A01	Fri Dec 06 14:02:45 EST 2019	204130	wolfft_ss_screen_review	UAS_Chrimson_Venus_X_0070	Rubin		Sample#2742902703771353186	m			GMR_SS00191	GMR_SS00191-20191122_47_B1	Drosophila melanogaster	20x	w; 38G07-p65ADZp in attP40/CyO; 37H01-ZpGdbd in attP2
SS00191	20191122_47_C2	A01	Fri Dec 06 14:02:45 EST 2019	204130	wolfft_ss_screen_review	UAS_Chrimson_Venus_X_0070	Rubin		Sample#2742902705025450082	f			GMR_SS00191	GMR_SS00191-20191122_47_C2	Drosophila melanogaster	20x	w; 38G07-p65ADZp in attP40/CyO; 37H01-ZpGdbd in attP2
SS00266	20221111_43_D2	A01	Tue Nov 29 11:55:47 EST 2022	251718	wolfft_ss_screen_review	UAS_Chrimson_Venus_X_0070	Rubin	attP40; attP2	Sample#3137511139055763554	f	Rubin	Tanya Wolff	GMR_SS00266	GMR_SS00266-20221111_43_D2	Drosophila melanogaster	20x	w; 72G03-p65ADZp in attP40/CyO; 70H05-ZpGdbd in attP2
SS00266	20221111_43_G6	A01	Tue Nov 29 11:55:47 EST 2022	251718	wolfft_ss_screen_review	UAS_Chrimson_Venus_X_0070	Rubin	attP40; attP2	Sample#3137511139194175586	m	Rubin	Tanya Wolff	GMR_SS00266	GMR_SS00266-20221111_43_G6	Drosophila melanogaster	20x	w; 72G03-p65ADZp in attP40/CyO; 70H05-ZpGdbd in attP2
SS00268	20230317_43_C4	A01	Wed Mar 29 15:31:09 EDT 2023	255009	wolfft_ss_screen_review	UAS_Chrimson_Venus_X_0070	Rubin	attP40; attP2	Sample#3181036783177564319	f	Rubin	Tanya Wolff	GMR_SS00268	GMR_SS00268-20230317_43_C4	Drosophila melanogaster	20x	w; 72G03-p65ADZp in attP40; 76E07-ZpGdbd in attP2
SS00268	20230317_44_A6	A01	Thu Mar 30 15:34:39 EDT 2023	255009	wolfft_ss_screen_review	UAS_Chrimson_Venus_X_0070	Rubin	attP40; attP2	Sample#3181400049275895967	m	Rubin	Tanya Wolff	GMR_SS00268	GMR_SS00268-20230317_44_A6	Drosophila melanogaster	20x	w; 72G03-p65ADZp in attP40; 76E07-ZpGdbd in attP2
SS00281	20230728_48_A6	A01	Thu Aug 24 15:23:05 EDT 2023	259538	wolfft_ss_screen_review	UAS_Chrimson_Venus_X_0070	Rubin	attP40; attP2	Sample#3234668156815409311	f	Rubin	Tanya Wolff	GMR_SS00281	GMR_SS00281-20230728_48_A6	Drosophila melanogaster	20x	w; 85G10-p65ADZp in attP40/CyO; 52F08-ZpGdbd in attP2
SS00281	20230728_48_B4	A01	Thu Aug 24 15:23:05 EDT 2023	259538	wolfft_ss_screen_review	UAS_Chrimson_Venus_X_0070	Rubin	attP40; attP2	Sample#3234668157335503007	m	Rubin	Tanya Wolff	GMR_SS00281	GMR_SS00281-20230728_48_B4	Drosophila melanogaster	20x	w; 85G10-p65ADZp in attP40/CyO; 52F08-ZpGdbd in attP2
SS00291	20220415_45_A3	A01	Mon May 02 17:19:07 EDT 2022	245555	rubing_ss_screen_review	UAS_Chrimson_Venus_X_0070	Rubin	attP40; attP2	Sample#3061113567387320418	f	Rubin	Gerry Rubin	GMR_SS00291	GMR_SS00291-20220415_45_A3	Drosophila melanogaster	20x	w; 91D10-p65ADZp in attP40; 89G01-ZpGdbd in attP2
SS00291	20220415_45_C3	A01	Mon May 02 17:19:07 EDT 2022	245555	rubing_ss_screen_review	UAS_Chrimson_Venus_X_0070	Rubin	attP40; attP2	Sample#3061113568645611618	m	Rubin	Gerry Rubin	GMR_SS00291	GMR_SS00291-20220415_45_C3	Drosophila melanogaster	20x	w; 91D10-p65ADZp in attP40; 89G01-ZpGdbd in attP2
SS00298	20220520_46_A2	A01	Tue Jun 07 15:05:07 EDT 2022	246487	nerna_ss_screen_review	UAS_Chrimson_Venus_X_0070	Rubin	attP40; attP2	Sample#3074125810399969378	f	Rubin	Aljoscha Nern	GMR_SS00298	GMR_SS00298-20220520_46_A2	Drosophila melanogaster	20x	w; 13E04-p65ADZp in attP40; 55D04-ZpGdbd in attP2
SS00298	20220520_46_C4	A01	Tue Jun 07 15:08:38 EDT 2022	246487	nerna_ss_screen_review	UAS_Chrimson_Venus_X_0070	Rubin	attP40; attP2	Sample#3074126693955272802	m	Rubin	Aljoscha Nern	GMR_SS00298	GMR_SS00298-20220520_46_C4	Drosophila melanogaster	20x	w; 13E04-p65ADZp in attP40; 55D04-ZpGdbd in attP2
SS00299	20230203_46_C3	A01	Tue Feb 14 17:18:38 EST 2023	254134	nerna_ss_screen_review	UAS_Chrimson_Venus_X_0070	Rubin	attP40; attP2	Sample#3165496249763758239	f	Rubin	Aljoscha Nern	GMR_SS00299	GMR_SS00299-20230203_46_C3	Drosophila melanogaster	20x	w; 13E04-p65ADZp in attP40/CyO; 60F01-ZpGdbd in attP2
SS00299	20230203_46_I3	A01	Tue Feb 14 17:18:38 EST 2023	254134	nerna_ss_screen_review	UAS_Chrimson_Venus_X_0070	Rubin	attP40; attP2	Sample#3165496253547020447	m	Rubin	Aljoscha Nern	GMR_SS00299	GMR_SS00299-20230203_46_I3	Drosophila melanogaster	20x	w; 13E04-p65ADZp in attP40/CyO; 60F01-ZpGdbd in attP2
SS00300	20201113_44_B1	A01	Mon Nov 23 17:04:39 EST 2020	217099	nerna_ss_screen_review	UAS_Chrimson_Venus_X_0070	Rubin	attP40; attP2	Sample#2870871398044139618	f			GMR_SS00300	GMR_SS00300-20201113_44_B1	Drosophila melanogaster	20x	w; 13E12-p65ADZp in attP40; 59C10-ZpGdbd in attP2
SS00300	20201113_44_E1	A01	Mon Nov 23 17:04:40 EST 2020	217099	nerna_ss_screen_review	UAS_Chrimson_Venus_X_0070	Rubin	attP40; attP2	Sample#2870871401374416994	m			GMR_SS00300	GMR_SS00300-20201113_44_E1	Drosophila melanogaster	20x	w; 13E12-p65ADZp in attP40; 59C10-ZpGdbd in attP2
SS00301	20220520_46_A3	A01	Tue Jun 07 15:05:07 EDT 2022	246488	nerna_ss_screen_review	UAS_Chrimson_Venus_X_0070	Rubin	attP40; attP2	Sample#3074125810509021282	f	Rubin	Aljoscha Nern	GMR_SS00301	GMR_SS00301-20220520_46_A3	Drosophila melanogaster	20x	w; 14E09-p65ADZp in attP40/CyO; 67E03-ZpGdbd in attP2
SS00301	20220520_46_C5	A01	Tue Jun 07 15:08:38 EDT 2022	246488	nerna_ss_screen_review	UAS_Chrimson_Venus_X_0070	Rubin	attP40; attP2	Sample#3074126694072713314	m	Rubin	Aljoscha Nern	GMR_SS00301	GMR_SS00301-20220520_46_C5	Drosophila melanogaster	20x	w; 14E09-p65ADZp in attP40/CyO; 67E03-ZpGdbd in attP2
SS00307	20201016_42_A2	A01	Wed Nov 04 14:12:06 EST 2020	214809	nerna_ss_screen_review	UAS_Chrimson_Venus_X_0070	Rubin	attP40; attP2	Sample#2863942603571724386	f			GMR_SS00307	GMR_SS00307-20201016_42_A2	Drosophila melanogaster	20x	w; 24C08-p65ADZp in attP40; 70B08-ZpGdbd in attP2
SS00307	20201016_42_E2	A01	Wed Nov 04 14:14:38 EST 2020	214809	nerna_ss_screen_review	UAS_Chrimson_Venus_X_0070	Rubin	attP40; attP2	Sample#2863943242859151458	m			GMR_SS00307	GMR_SS00307-20201016_42_E2	Drosophila melanogaster	20x	w; 24C08-p65ADZp in attP40; 70B08-ZpGdbd in attP2
SS00308	20200724_43_B5	A01	Wed Aug 26 11:09:37 EDT 2020	212724	nerna_ss_screen_review	UAS_Chrimson_Venus_X_0070	Rubin	attP40; attP2	Sample#2838514432122814562	f			GMR_SS00308	GMR_SS00308-20200724_43_B5	Drosophila melanogaster	20x	w; 26A08-p65ADZp in attP40; 72G03-ZpGdbd in attP2
SS00308	20200724_43_E6	A01	Wed Aug 26 11:09:39 EDT 2020	212724	nerna_ss_screen_review	UAS_Chrimson_Venus_X_0070	Rubin	attP40; attP2	Sample#2838514439622230114	m			GMR_SS00308	GMR_SS00308-20200724_43_E6	Drosophila melanogaster	20x	w; 26A08-p65ADZp in attP40; 72G03-ZpGdbd in attP2
SS00309	20200724_43_C3	A01	Wed Aug 26 11:09:38 EDT 2020	212721	nerna_ss_screen_review	UAS_Chrimson_Venus_X_0070	Rubin	attP40; attP2	Sample#2838514433733427298	f			GMR_SS00309	GMR_SS00309-20200724_43_C3	Drosophila melanogaster	20x	w; 28D04-p65ADZp in attP40; 72E04-ZpGdbd in attP2
SS00309	20200724_43_F4	A01	Wed Aug 26 11:09:39 EDT 2020	212721	nerna_ss_screen_review	UAS_Chrimson_Venus_X_0070	Rubin	attP40; attP2	Sample#2838514441136373858	m			GMR_SS00309	GMR_SS00309-20200724_43_F4	Drosophila melanogaster	20x	w; 28D04-p65ADZp in attP40; 72E04-ZpGdbd in attP2
SS00313	20210312_42_B1	A01	Fri Apr 09 17:41:44 EDT 2021	222111	nerna_ss_screen_review	UAS_Chrimson_Venus_X_0070	Rubin	attP40; attP2	Sample#2920512767083413602	f	Rubin	Aljoscha Nern	GMR_SS00313	GMR_SS00313-20210312_42_B1	Drosophila melanogaster	20x	w; 38C11-p65ADZp in attP40/CyO; 59C10-ZpGdbd in attP2
SS00313	20210312_42_C4	A01	Fri Apr 09 17:41:44 EDT 2021	222111	nerna_ss_screen_review	UAS_Chrimson_Venus_X_0070	Rubin	attP40; attP2	Sample#2920512768618528866	m	Rubin	Aljoscha Nern	GMR_SS00313	GMR_SS00313-20210312_42_C4	Drosophila melanogaster	20x	w; 38C11-p65ADZp in attP40/CyO; 59C10-ZpGdbd in attP2
SS00315	20191218_45_I2	A01	Wed Jan 22 17:59:37 EST 2020	205445	nerna_ss_screen_review	UAS_Chrimson_Venus_X_0070	Rubin	attP40; attP2	Sample#2759994543821553762	f			GMR_SS00315	GMR_SS00315-20191218_45_I2	Drosophila melanogaster	20x	w; 47H03-p65ADZp in attP40; 72E01-ZpGdbd in attP2/TM6B
SS00315	20191218_46_I2	A01	Wed Jan 22 18:32:08 EST 2020	205445	nerna_ss_screen_review	UAS_Chrimson_Venus_X_0070	Rubin	attP40; attP2	Sample#2760002725348376674	m			GMR_SS00315	GMR_SS00315-20191218_46_I2	Drosophila melanogaster	20x	w; 47H03-p65ADZp in attP40; 72E01-ZpGdbd in attP2/TM6B
SS00316	20210312_42_B2	A01	Fri Apr 09 17:41:44 EDT 2021	222112	nerna_ss_screen_review	UAS_Chrimson_Venus_X_0070	Rubin	attP40; attP2	Sample#2920512767251185762	f	Rubin	Aljoscha Nern	GMR_SS00316	GMR_SS00316-20210312_42_B2	Drosophila melanogaster	20x	w; 48A07-p65ADZp in attP40/CyO; 79H02-ZpGdbd in attP2
SS00316	20210312_42_C5	A01	Fri Apr 09 17:41:44 EDT 2021	222112	nerna_ss_screen_review	UAS_Chrimson_Venus_X_0070	Rubin	attP40; attP2	Sample#2920512768794689634	m	Rubin	Aljoscha Nern	GMR_SS00316	GMR_SS00316-20210312_42_C5	Drosophila melanogaster	20x	w; 48A07-p65ADZp in attP40/CyO; 79H02-ZpGdbd in attP2
SS00317	20200724_43_C1	A01	Wed Aug 26 11:09:37 EDT 2020	212719	nerna_ss_screen_review	UAS_Chrimson_Venus_X_0070	Rubin	attP40; attP2	Sample#2838514432961675362	f			GMR_SS00317	GMR_SS00317-20200724_43_C1	Drosophila melanogaster	20x	w; 52B07-p65ADZp in attP40; 53C05-ZpGdbd in attP2
SS00317	20200724_43_F2	A01	Wed Aug 26 11:09:39 EDT 2020	212719	nerna_ss_screen_review	UAS_Chrimson_Venus_X_0070	Rubin	attP40; attP2	Sample#2838514440389787746	m			GMR_SS00317	GMR_SS00317-20200724_43_F2	Drosophila melanogaster	20x	w; 52B07-p65ADZp in attP40; 53C05-ZpGdbd in attP2
SS00318	20220520_46_A5	A01	Tue Jun 07 15:05:07 EDT 2022	246490	nerna_ss_screen_review	UAS_Chrimson_Venus_X_0070	Rubin	attP40; attP2	Sample#3074125810735513698	f	Rubin	Aljoscha Nern	GMR_SS00318	GMR_SS00318-20220520_46_A5	Drosophila melanogaster	20x	w; 52D11-p65ADZp in attP40/CyO; 32B03-ZpGdbd in attP2
SS00318	20220520_46_D1	A01	Tue Jun 07 15:08:38 EDT 2022	246490	nerna_ss_screen_review	UAS_Chrimson_Venus_X_0070	Rubin	attP40; attP2	Sample#3074126694299205730	m	Rubin	Aljoscha Nern	GMR_SS00318	GMR_SS00318-20220520_46_D1	Drosophila melanogaster	20x	w; 52D11-p65ADZp in attP40/CyO; 32B03-ZpGdbd in attP2
SS00319	20230421_45_B6	A01	Mon May 01 16:53:37 EDT 2023	256175	nerna_ss_screen_review	UAS_Chrimson_Venus_X_0070	Rubin	attP40; attP2	Sample#3193016333683916959	f	Rubin	Aljoscha Nern	GMR_SS00319	GMR_SS00319-20230421_45_B6	Drosophila melanogaster	20x	w; 52D11-p65ADZp in attP40/CyO; 67E05-ZpGdbd in attP2
SS00319	20230421_45_E4	A01	Mon May 01 16:53:37 EDT 2023	256175	nerna_ss_screen_review	UAS_Chrimson_Venus_X_0070	Rubin	attP40; attP2	Sample#3193016336452157599	m	Rubin	Aljoscha Nern	GMR_SS00319	GMR_SS00319-20230421_45_E4	Drosophila melanogaster	20x	w; 52D11-p65ADZp in attP40/CyO; 67E05-ZpGdbd in attP2
SS00320	20201113_44_B2	A01	Mon Nov 23 17:04:39 EST 2020	217100	nerna_ss_screen_review	UAS_Chrimson_Venus_X_0070	Rubin	attP40; attP2	Sample#2870871398425821282	f			GMR_SS00320	GMR_SS00320-20201113_44_B2	Drosophila melanogaster	20x	w; 53C02-p65ADZp in attP40/CyO; 60H04-ZpGdbd in attP2
SS00320	20201113_44_E2	A01	Mon Nov 23 17:04:40 EST 2020	217100	nerna_ss_screen_review	UAS_Chrimson_Venus_X_0070	Rubin	attP40; attP2	Sample#2870871401802236002	m			GMR_SS00320	GMR_SS00320-20201113_44_E2	Drosophila melanogaster	20x	w; 53C02-p65ADZp in attP40/CyO; 60H04-ZpGdbd in attP2
SS00321	20201218_51_B3	A01	Fri Jan 15 17:23:15 EST 2021	218747	nerna_ss_screen_review	UAS_Chrimson_Venus_X_0070	Rubin	attP40; attP2	Sample#2890082635843895329	f	Rubin	Aljoscha Nern	GMR_SS00321	GMR_SS00321-20201218_51_B3	Drosophila melanogaster	20x	w; 53E04-p65ADZp in attP40; 75H08-ZpGdbd in attP2
SS00321	20201218_51_E3	A01	Fri Jan 15 17:23:11 EST 2021	218747	nerna_ss_screen_review	UAS_Chrimson_Venus_X_0070	Rubin	attP40; attP2	Sample#2890082620480159777	m	Rubin	Aljoscha Nern	GMR_SS00321	GMR_SS00321-20201218_51_E3	Drosophila melanogaster	20x	w; 53E04-p65ADZp in attP40; 75H08-ZpGdbd in attP2
SS00322	20230203_46_C5	A01	Tue Feb 14 17:18:38 EST 2023	254136	nerna_ss_screen_review	UAS_Chrimson_Venus_X_0070	Rubin	attP40; attP2	Sample#3165496249977667743	f	Rubin	Aljoscha Nern	GMR_SS00322	GMR_SS00322-20230203_46_C5	Drosophila melanogaster	20x	w; 55D04-p65ADZp in attP40; 15C01-ZpGdbd in attP2
SS00322	20230203_46_I5	A01	Tue Feb 14 17:18:38 EST 2023	254136	nerna_ss_screen_review	UAS_Chrimson_Venus_X_0070	Rubin	attP40; attP2	Sample#3165496253752541343	m	Rubin	Aljoscha Nern	GMR_SS00322	GMR_SS00322-20230203_46_I5	Drosophila melanogaster	20x	w; 55D04-p65ADZp in attP40; 15C01-ZpGdbd in attP2
SS00323	20200724_43_C2	A01	Wed Aug 26 11:09:37 EDT 2020	212720	nerna_ss_screen_review	UAS_Chrimson_Venus_X_0070	Rubin	attP40; attP2	Sample#2838514433372717154	f			GMR_SS00323	GMR_SS00323-20200724_43_C2	Drosophila melanogaster	20x	w; 55F02-p65ADZp in attP40; 24F06-ZpGdbd in attP2
SS00323	20200724_43_F3	A01	Wed Aug 26 11:09:39 EDT 2020	212720	nerna_ss_screen_review	UAS_Chrimson_Venus_X_0070	Rubin	attP40; attP2	Sample#2838514440775663714	m			GMR_SS00323	GMR_SS00323-20200724_43_F3	Drosophila melanogaster	20x	w; 55F02-p65ADZp in attP40; 24F06-ZpGdbd in attP2
SS00324	20200821_42_A2	A01	Thu Sep 03 13:31:38 EDT 2020	213158	nerna_ss_screen_review	UAS_Chrimson_Venus_X_0070	Rubin	attP40; attP2	Sample#2841449272149278818	f			GMR_SS00324	GMR_SS00324-20200821_42_A2	Drosophila melanogaster	20x	w; 59E08-p65ADZp in attP40; 42F06-ZpGdbd in attP2
SS00324	20200821_42_E2	A01	Thu Sep 03 13:31:40 EDT 2020	213158	nerna_ss_screen_review	UAS_Chrimson_Venus_X_0070	Rubin	attP40; attP2	Sample#2841449280869236834	m			GMR_SS00324	GMR_SS00324-20200821_42_E2	Drosophila melanogaster	20x	w; 59E08-p65ADZp in attP40; 42F06-ZpGdbd in attP2
SS00327	20200724_43_C4	A01	Wed Aug 26 11:09:38 EDT 2020	212722	nerna_ss_screen_review	UAS_Chrimson_Venus_X_0070	Rubin	attP40; attP2	Sample#2838514434115108962	f			GMR_SS00327	GMR_SS00327-20200724_43_C4	Drosophila melanogaster	20x	w; 65H03-p65ADZp in attP40; 71D01-ZpGdbd in attP2
SS00327	20200724_43_F5	A01	Wed Aug 26 11:09:39 EDT 2020	212722	nerna_ss_screen_review	UAS_Chrimson_Venus_X_0070	Rubin	attP40; attP2	Sample#2838514441497084002	m			GMR_SS00327	GMR_SS00327-20200724_43_F5	Drosophila melanogaster	20x	w; 65H03-p65ADZp in attP40; 71D01-ZpGdbd in attP2
SS00328	20201016_42_A1	A01	Wed Nov 04 14:12:06 EST 2020	214810	nerna_ss_screen_review	UAS_Chrimson_Venus_X_0070	Rubin	attP40; attP2	Sample#2863942603118739554	f			GMR_SS00328	GMR_SS00328-20201016_42_A1	Drosophila melanogaster	20x	w; 70B07-p65ADZp in attP40; 65D05-ZpGdbd in attP2
SS00328	20201016_42_E1	A01	Wed Nov 04 14:14:38 EST 2020	214810	nerna_ss_screen_review	UAS_Chrimson_Venus_X_0070	Rubin	attP40; attP2	Sample#2863943242456498274	m			GMR_SS00328	GMR_SS00328-20201016_42_E1	Drosophila melanogaster	20x	w; 70B07-p65ADZp in attP40; 65D05-ZpGdbd in attP2
SS00330	20230203_46_C6	A01	Tue Feb 14 17:18:38 EST 2023	254137	nerna_ss_screen_review	UAS_Chrimson_Venus_X_0070	Rubin	attP40; attP2	Sample#3165496250082525343	f	Rubin	Aljoscha Nern	GMR_SS00330	GMR_SS00330-20230203_46_C6	Drosophila melanogaster	20x	w; 70G02-p65ADZp in attP40/CyO; 53C05-ZpGdbd in attP2
SS00330	20230203_46_I6	A01	Tue Feb 14 17:18:38 EST 2023	254137	nerna_ss_screen_review	UAS_Chrimson_Venus_X_0070	Rubin	attP40; attP2	Sample#3165496253861593247	m	Rubin	Aljoscha Nern	GMR_SS00330	GMR_SS00330-20230203_46_I6	Drosophila melanogaster	20x	w; 70G02-p65ADZp in attP40/CyO; 53C05-ZpGdbd in attP2
SS00331	20200724_43_A4	A01	Wed Aug 26 11:09:37 EDT 2020	212718	nerna_ss_screen_review	UAS_Chrimson_Venus_X_0070	Rubin	attP40; attP2	Sample#2838514429455237218	f			GMR_SS00331	GMR_SS00331-20200724_43_A4	Drosophila melanogaster	20x	w; 71D01-p65ADZp in attP40; 10C06-ZpGdbd in attP2
SS00331	20200724_43_D5	A01	Wed Aug 26 11:09:38 EDT 2020	212718	nerna_ss_screen_review	UAS_Chrimson_Venus_X_0070	Rubin	attP40; attP2	Sample#2838514436782686306	m			GMR_SS00331	GMR_SS00331-20200724_43_D5	Drosophila melanogaster	20x	w; 71D01-p65ADZp in attP40; 10C06-ZpGdbd in attP2
SS00332	20230203_46_D1	A01	Tue Feb 14 17:18:38 EST 2023	254138	nerna_ss_screen_review	UAS_Chrimson_Venus_X_0070	Rubin	attP40; attP2	Sample#3165496250187382943	f	Rubin	Aljoscha Nern	GMR_SS00332	GMR_SS00332-20230203_46_D1	Drosophila melanogaster	20x	w; 73C04-p65ADZp in attP40; 70E04-ZpGdbd in attP2
SS00332	20230203_47_F1	A01	Thu Feb 23 11:33:08 EST 2023	254138	nerna_ss_screen_review	UAS_Chrimson_Venus_X_0070	Rubin	attP40; attP2	Sample#3168670793332687007	m	Rubin	Aljoscha Nern	GMR_SS00332	GMR_SS00332-20230203_47_F1	Drosophila melanogaster	20x	w; 73C04-p65ADZp in attP40; 70E04-ZpGdbd in attP2
SS00335	20220520_46_B1	A01	Tue Jun 07 15:05:07 EDT 2022	246492	nerna_ss_screen_review	UAS_Chrimson_Venus_X_0070	Rubin	attP40; attP2	Sample#3074125810962006114	f	Rubin	Aljoscha Nern	GMR_SS00335	GMR_SS00335-20220520_46_B1	Drosophila melanogaster	20x	w; 82C05-p65ADZp in attP40/CyO; 52D11-ZpGdbd in attP2
SS00335	20220520_46_D3	A01	Tue Jun 07 15:08:38 EDT 2022	246492	nerna_ss_screen_review	UAS_Chrimson_Venus_X_0070	Rubin	attP40; attP2	Sample#3074126694521503842	m	Rubin	Aljoscha Nern	GMR_SS00335	GMR_SS00335-20220520_46_D3	Drosophila melanogaster	20x	w; 82C05-p65ADZp in attP40/CyO; 52D11-ZpGdbd in attP2
SS00336	20220520_46_B2	A01	Tue Jun 07 15:05:07 EDT 2022	246493	nerna_ss_screen_review	UAS_Chrimson_Venus_X_0070	Rubin	attP40; attP2	Sample#3074125811075252322	f	Rubin	Aljoscha Nern	GMR_SS00336	GMR_SS00336-20220520_46_B2	Drosophila melanogaster	20x	w; 91C12-p65ADZp in attP40; 65H03-ZpGdbd in attP2
SS00336	20220520_46_D4	A01	Tue Jun 07 15:08:38 EDT 2022	246493	nerna_ss_screen_review	UAS_Chrimson_Venus_X_0070	Rubin	attP40; attP2	Sample#3074126694634750050	m	Rubin	Aljoscha Nern	GMR_SS00336	GMR_SS00336-20220520_46_D4	Drosophila melanogaster	20x	w; 91C12-p65ADZp in attP40; 65H03-ZpGdbd in attP2
SS00340	20230203_46_D2	A01	Tue Feb 14 17:18:38 EST 2023	254139	nerna_ss_screen_review	UAS_Chrimson_Venus_X_0070	Rubin	attP40; attP2	Sample#3165496250292240543	f	Rubin	Aljoscha Nern	GMR_SS00340	GMR_SS00340-20230203_46_D2	Drosophila melanogaster	20x	w; 10G02-p65ADZp in attP40; 23E07-ZpGdbd in attP2
SS00340	20230203_47_F2	A01	Thu Feb 23 11:33:08 EST 2023	254139	nerna_ss_screen_review	UAS_Chrimson_Venus_X_0070	Rubin	attP40; attP2	Sample#3168670793433350303	m	Rubin	Aljoscha Nern	GMR_SS00340	GMR_SS00340-20230203_47_F2	Drosophila melanogaster	20x	w; 10G02-p65ADZp in attP40; 23E07-ZpGdbd in attP2
SS00342	20230421_45_C1	A01	Mon May 01 16:53:37 EDT 2023	256176	nerna_ss_screen_review	UAS_Chrimson_Venus_X_0070	Rubin	attP40; attP2	Sample#3193016333860077727	f	Rubin	Aljoscha Nern	GMR_SS00342	GMR_SS00342-20230421_45_C1	Drosophila melanogaster	20x	w; 15D08-p65ADZp in attP40; 30A07-ZpGdbd in attP2
SS00342	20230421_45_E5	A01	Mon May 01 16:53:38 EDT 2023	256176	nerna_ss_screen_review	UAS_Chrimson_Venus_X_0070	Rubin	attP40; attP2	Sample#3193016336615735455	m	Rubin	Aljoscha Nern	GMR_SS00342	GMR_SS00342-20230421_45_E5	Drosophila melanogaster	20x	w; 15D08-p65ADZp in attP40; 30A07-ZpGdbd in attP2
SS00343	20191218_45_I1	A01	Wed Jan 22 17:59:37 EST 2020	205447	nerna_ss_screen_review	UAS_Chrimson_Venus_X_0070	Rubin	VK00027, attP2	Sample#2759994543590867042	f			GMR_SS00343	GMR_SS00343-20191218_45_I1	Drosophila melanogaster	20x	w;; 17A04-p65ADZp in VK00027, 35B06-ZpGdbd in attP2
SS00343	20191218_46_I1	A01	Wed Jan 22 18:32:08 EST 2020	205447	nerna_ss_screen_review	UAS_Chrimson_Venus_X_0070	Rubin	VK00027, attP2	Sample#2760002725121884258	m			GMR_SS00343	GMR_SS00343-20191218_46_I1	Drosophila melanogaster	20x	w;; 17A04-p65ADZp in VK00027, 35B06-ZpGdbd in attP2
SS00346	20220520_46_B4	A01	Tue Jun 07 15:05:07 EDT 2022	246495	nerna_ss_screen_review	UAS_Chrimson_Venus_X_0070	Rubin	attP40; attP2	Sample#3074125811297550434	f	Rubin	Aljoscha Nern	GMR_SS00346	GMR_SS00346-20220520_46_B4	Drosophila melanogaster	20x	w; 22B12-p65ADZp in attP40/CyO; 60B09-ZpGdbd in attP2/TM6B
SS00346	20220520_46_D6	A01	Tue Jun 07 15:08:38 EDT 2022	246495	nerna_ss_screen_review	UAS_Chrimson_Venus_X_0070	Rubin	attP40; attP2	Sample#3074126694857048162	m	Rubin	Aljoscha Nern	GMR_SS00346	GMR_SS00346-20220520_46_D6	Drosophila melanogaster	20x	w; 22B12-p65ADZp in attP40/CyO; 60B09-ZpGdbd in attP2/TM6B
SS00347	20230421_45_C2	A01	Mon May 01 16:53:37 EDT 2023	256177	nerna_ss_screen_review	UAS_Chrimson_Venus_X_0070	Rubin	attP40; attP2	Sample#3193016334032044191	f	Rubin	Aljoscha Nern	GMR_SS00347	GMR_SS00347-20230421_45_C2	Drosophila melanogaster	20x	w; 24E12-p65ADZp in attP40; 72G07-ZpGdbd in attP2
SS00347	20230421_45_E6	A01	Mon May 01 16:53:38 EDT 2023	256177	nerna_ss_screen_review	UAS_Chrimson_Venus_X_0070	Rubin	attP40; attP2	Sample#3193016336779313311	m	Rubin	Aljoscha Nern	GMR_SS00347	GMR_SS00347-20230421_45_E6	Drosophila melanogaster	20x	w; 24E12-p65ADZp in attP40; 72G07-ZpGdbd in attP2
SS00349	20221111_44_F6	A01	Tue Dec 06 14:03:08 EST 2022	251725	nerna_ss_screen_review	UAS_Chrimson_Venus_X_0070	Rubin	attP40; attP2	Sample#3140079900430434402	f	Rubin	Aljoscha Nern	GMR_SS00349	GMR_SS00349-20221111_44_F6	Drosophila melanogaster	20x	w; 36B07-p65ADZp in attP40/CyO; 92A11-ZpGdbd in attP2
SS00349	20221111_45_E6	A01	Wed Nov 30 16:01:38 EST 2022	251725	nerna_ss_screen_review	UAS_Chrimson_Venus_X_0070	Rubin	attP40; attP2	Sample#3137935395367420002	m	Rubin	Aljoscha Nern	GMR_SS00349	GMR_SS00349-20221111_45_E6	Drosophila melanogaster	20x	w; 36B07-p65ADZp in attP40/CyO; 92A11-ZpGdbd in attP2
SS00353	20221111_44_G1	A01	Tue Dec 06 14:03:08 EST 2022	251726	nerna_ss_screen_review	UAS_Chrimson_Venus_X_0070	Rubin	attP40; attP2	Sample#3140079900539486306	f	Rubin	Aljoscha Nern	GMR_SS00353	GMR_SS00353-20221111_44_G1	Drosophila melanogaster	20x	w; 40F12-p65ADZp in attP40/CyO; 25B02-ZpGdbd in attP2
SS00353	20221111_45_F1	A01	Wed Nov 30 16:01:38 EST 2022	251726	nerna_ss_screen_review	UAS_Chrimson_Venus_X_0070	Rubin	attP40; attP2	Sample#3137935395480666210	m	Rubin	Aljoscha Nern	GMR_SS00353	GMR_SS00353-20221111_45_F1	Drosophila melanogaster	20x	w; 40F12-p65ADZp in attP40/CyO; 25B02-ZpGdbd in attP2
SS00356	20230421_45_C3	A01	Mon May 01 16:53:37 EDT 2023	256178	nerna_ss_screen_review	UAS_Chrimson_Venus_X_0070	Rubin	attP40; attP2	Sample#3193016334204010655	f	Rubin	Aljoscha Nern	GMR_SS00356	GMR_SS00356-20230421_45_C3	Drosophila melanogaster	20x	w; 47H03-p65ADZp in attP40; 86D05-ZpGdbd in attP2
SS00356	20230421_45_F1	A01	Mon May 01 16:19:35 EDT 2023	256178	nerna_ss_screen_review	UAS_Chrimson_Venus_X_0070	Rubin	attP40; attP2	Sample#3193007769464602783	m	Rubin	Aljoscha Nern	GMR_SS00356	GMR_SS00356-20230421_45_F1	Drosophila melanogaster	20x	w; 47H03-p65ADZp in attP40; 86D05-ZpGdbd in attP2
SS00359	20230203_46_D6	A01	Tue Feb 14 17:18:38 EST 2023	254143	nerna_ss_screen_review	UAS_Chrimson_Venus_X_0070	Rubin	attP40; attP2	Sample#3165496250707476639	f	Rubin	Aljoscha Nern	GMR_SS00359	GMR_SS00359-20230203_46_D6	Drosophila melanogaster	20x	w; 54E05-p65ADZp in attP40; 87B02-ZpGdbd in attP2
SS00359	20230203_47_F6	A01	Thu Feb 23 11:33:08 EST 2023	254143	nerna_ss_screen_review	UAS_Chrimson_Venus_X_0070	Rubin	attP40; attP2	Sample#3168670793852780703	m	Rubin	Aljoscha Nern	GMR_SS00359	GMR_SS00359-20230203_47_F6	Drosophila melanogaster	20x	w; 54E05-p65ADZp in attP40; 87B02-ZpGdbd in attP2
SS00360	20220520_46_B5	A01	Tue Jun 07 15:05:07 EDT 2022	246496	nerna_ss_screen_review	UAS_Chrimson_Venus_X_0070	Rubin	attP40; attP2	Sample#3074125811410796642	f	Rubin	Aljoscha Nern	GMR_SS00360	GMR_SS00360-20220520_46_B5	Drosophila melanogaster	20x	w; 55D02-p65ADZp in attP40; 23E07-ZpGdbd in attP2
SS00360	20220520_46_E1	A01	Tue Jun 07 15:08:38 EDT 2022	246496	nerna_ss_screen_review	UAS_Chrimson_Venus_X_0070	Rubin	attP40; attP2	Sample#3074126694978682978	m	Rubin	Aljoscha Nern	GMR_SS00360	GMR_SS00360-20220520_46_E1	Drosophila melanogaster	20x	w; 55D02-p65ADZp in attP40; 23E07-ZpGdbd in attP2
SS00362	20230721_45_F1	A01	Tue Aug 22 15:16:37 EDT 2023	258693	nerna_ss_screen_review	UAS_Chrimson_Venus_X_0070	Rubin	attP40; attP2	Sample#3233941750460448927	f	Rubin	Aljoscha Nern	GMR_SS00362	GMR_SS00362-20230721_45_F1	Drosophila melanogaster	20x	w; 64B03-p65ADZp in attP40; 65B04-ZpGdbd in attP2
SS00362	20230721_45_F5	A01	Tue Aug 22 15:16:36 EDT 2023	258693	nerna_ss_screen_review	UAS_Chrimson_Venus_X_0070	Rubin	attP40; attP2	Sample#3233941749999075487	m	Rubin	Aljoscha Nern	GMR_SS00362	GMR_SS00362-20230721_45_F5	Drosophila melanogaster	20x	w; 64B03-p65ADZp in attP40; 65B04-ZpGdbd in attP2
SS00363	20221111_44_G2	A01	Tue Dec 06 14:03:08 EST 2022	251727	nerna_ss_screen_review	UAS_Chrimson_Venus_X_0070	Rubin	attP40; attP2	Sample#3140079900652732514	f	Rubin	Aljoscha Nern	GMR_SS00363	GMR_SS00363-20221111_44_G2	Drosophila melanogaster	20x	w; 64F08-p65ADZp in attP40; 22G07-ZpGdbd in attP2
SS00363	20221111_45_F2	A01	Wed Nov 30 16:01:38 EST 2022	251727	nerna_ss_screen_review	UAS_Chrimson_Venus_X_0070	Rubin	attP40; attP2	Sample#3137935395598106722	m	Rubin	Aljoscha Nern	GMR_SS00363	GMR_SS00363-20221111_45_F2	Drosophila melanogaster	20x	w; 64F08-p65ADZp in attP40; 22G07-ZpGdbd in attP2
SS00365	20230203_46_E1	A01	Tue Feb 14 17:18:38 EST 2023	254145	nerna_ss_screen_review	UAS_Chrimson_Venus_X_0070	Rubin	attP40; attP2	Sample#3165496250808139935	f	Rubin	Aljoscha Nern	GMR_SS00365	GMR_SS00365-20230203_46_E1	Drosophila melanogaster	20x	w; 65H10-p65ADZp in attP40; 47B02-ZpGdbd in attP2
SS00365	20230203_47_C1	A01	Thu Feb 23 11:33:07 EST 2023	254145	nerna_ss_screen_review	UAS_Chrimson_Venus_X_0070	Rubin	attP40; attP2	Sample#3168670791457833119	m	Rubin	Aljoscha Nern	GMR_SS00365	GMR_SS00365-20230203_47_C1	Drosophila melanogaster	20x	w; 65H10-p65ADZp in attP40; 47B02-ZpGdbd in attP2
SS00367	20230203_46_E2	A01	Tue Feb 14 17:18:38 EST 2023	254146	nerna_ss_screen_review	UAS_Chrimson_Venus_X_0070	Rubin	attP40; attP2	Sample#3165496250912997535	f	Rubin	Aljoscha Nern	GMR_SS00367	GMR_SS00367-20230203_46_E2	Drosophila melanogaster	20x	w; 67F03-p65ADZp in attP40/CyO; 10G01-ZpGdbd in attP2
SS00367	20230203_47_C2	A01	Thu Feb 23 11:33:07 EST 2023	254146	nerna_ss_screen_review	UAS_Chrimson_Venus_X_0070	Rubin	attP40; attP2	Sample#3168670791566885023	m	Rubin	Aljoscha Nern	GMR_SS00367	GMR_SS00367-20230203_47_C2	Drosophila melanogaster	20x	w; 67F03-p65ADZp in attP40/CyO; 10G01-ZpGdbd in attP2
SS00368	20230203_46_E3	A01	Tue Feb 14 17:18:38 EST 2023	254147	nerna_ss_screen_review	UAS_Chrimson_Venus_X_0070	Rubin	attP40; attP2	Sample#3165496251017855135	f	Rubin	Aljoscha Nern	GMR_SS00368	GMR_SS00368-20230203_46_E3	Drosophila melanogaster	20x	w; 67F03-p65ADZp in attP40/CyO; 35D04-ZpGdbd in attP2
SS00368	20230203_47_C3	A01	Thu Feb 23 11:33:07 EST 2023	254147	nerna_ss_screen_review	UAS_Chrimson_Venus_X_0070	Rubin	attP40; attP2	Sample#3168670791671742623	m	Rubin	Aljoscha Nern	GMR_SS00368	GMR_SS00368-20230203_47_C3	Drosophila melanogaster	20x	w; 67F03-p65ADZp in attP40/CyO; 35D04-ZpGdbd in attP2
SS00369	20230203_46_E4	A01	Tue Feb 14 17:18:38 EST 2023	254148	nerna_ss_screen_review	UAS_Chrimson_Venus_X_0070	Rubin	attP40; attP2	Sample#3165496251122712735	f	Rubin	Aljoscha Nern	GMR_SS00369	GMR_SS00369-20230203_46_E4	Drosophila melanogaster	20x	w; 67F03-p65ADZp in attP40; 68C09-ZpGdbd in attP2
SS00369	20230203_47_C4	A01	Thu Feb 23 11:33:07 EST 2023	254148	nerna_ss_screen_review	UAS_Chrimson_Venus_X_0070	Rubin	attP40; attP2	Sample#3168670791772405919	m	Rubin	Aljoscha Nern	GMR_SS00369	GMR_SS00369-20230203_47_C4	Drosophila melanogaster	20x	w; 67F03-p65ADZp in attP40; 68C09-ZpGdbd in attP2
SS00370	20221111_44_G3	A01	Tue Dec 06 14:03:08 EST 2022	251728	nerna_ss_screen_review	UAS_Chrimson_Venus_X_0070	Rubin	attP40; attP2	Sample#3140079900761784418	f	Rubin	Aljoscha Nern	GMR_SS00370	GMR_SS00370-20221111_44_G3	Drosophila melanogaster	20x	w; 71F06-p65ADZp in attP40; 12C02-ZpGdbd in attP2
SS00370	20221111_45_F3	A01	Wed Nov 30 16:01:38 EST 2022	251728	nerna_ss_screen_review	UAS_Chrimson_Venus_X_0070	Rubin	attP40; attP2	Sample#3137935395719741538	m	Rubin	Aljoscha Nern	GMR_SS00370	GMR_SS00370-20221111_45_F3	Drosophila melanogaster	20x	w; 71F06-p65ADZp in attP40; 12C02-ZpGdbd in attP2
SS00373	20230203_46_E5	A01	Tue Feb 14 17:18:38 EST 2023	254149	nerna_ss_screen_review	UAS_Chrimson_Venus_X_0070	Rubin	attP40; attP2	Sample#3165496251227570335	f	Rubin	Aljoscha Nern	GMR_SS00373	GMR_SS00373-20230203_46_E5	Drosophila melanogaster	20x	w; 73F07-p65ADZp in attP40; 60H04-ZpGdbd in attP2
SS00373	20230203_47_C5	A01	Thu Feb 23 11:33:07 EST 2023	254149	nerna_ss_screen_review	UAS_Chrimson_Venus_X_0070	Rubin	attP40; attP2	Sample#3168670791877263519	m	Rubin	Aljoscha Nern	GMR_SS00373	GMR_SS00373-20230203_47_C5	Drosophila melanogaster	20x	w; 73F07-p65ADZp in attP40; 60H04-ZpGdbd in attP2
SS00374	20230203_46_E6	A01	Tue Feb 14 17:18:38 EST 2023	254150	nerna_ss_screen_review	UAS_Chrimson_Venus_X_0070	Rubin	attP40; attP2	Sample#3165496251332427935	f	Rubin	Aljoscha Nern	GMR_SS00374	GMR_SS00374-20230203_46_E6	Drosophila melanogaster	20x	w; 73F07-p65ADZp in attP40; 89G09-ZpGdbd in attP2
SS00374	20230203_47_C6	A01	Thu Feb 23 11:33:07 EST 2023	254150	nerna_ss_screen_review	UAS_Chrimson_Venus_X_0070	Rubin	attP40; attP2	Sample#3168670791982121119	m	Rubin	Aljoscha Nern	GMR_SS00374	GMR_SS00374-20230203_47_C6	Drosophila melanogaster	20x	w; 73F07-p65ADZp in attP40; 89G09-ZpGdbd in attP2
SS00375	20230203_46_F1	A01	Tue Feb 14 17:18:38 EST 2023	254151	nerna_ss_screen_review	UAS_Chrimson_Venus_X_0070	Rubin	attP40; attP2	Sample#3165496251437285535	f	Rubin	Aljoscha Nern	GMR_SS00375	GMR_SS00375-20230203_46_F1	Drosophila melanogaster	20x	w; 78H05-p65ADZp in attP40; 31H09-ZpGdbd in attP2
SS00375	20230203_47_D1	A01	Thu Feb 23 11:33:07 EST 2023	254151	nerna_ss_screen_review	UAS_Chrimson_Venus_X_0070	Rubin	attP40; attP2	Sample#3168670792082784415	m	Rubin	Aljoscha Nern	GMR_SS00375	GMR_SS00375-20230203_47_D1	Drosophila melanogaster	20x	w; 78H05-p65ADZp in attP40; 31H09-ZpGdbd in attP2
SS00382	20220520_46_B6	A01	Tue Jun 07 15:05:07 EDT 2022	246497	nerna_ss_screen_review	UAS_Chrimson_Venus_X_0070	Rubin	attP40; attP2	Sample#3074125811524042850	f	Rubin	Aljoscha Nern	GMR_SS00382	GMR_SS00382-20220520_46_B6	Drosophila melanogaster	20x	w; 82D10-p65ADZp in attP40; 65B04-ZpGdbd in attP2
SS00382	20220520_46_E2	A01	Tue Jun 07 15:08:38 EDT 2022	246497	nerna_ss_screen_review	UAS_Chrimson_Venus_X_0070	Rubin	attP40; attP2	Sample#3074126695083540578	m	Rubin	Aljoscha Nern	GMR_SS00382	GMR_SS00382-20220520_46_E2	Drosophila melanogaster	20x	w; 82D10-p65ADZp in attP40; 65B04-ZpGdbd in attP2
SS00384	20201218_51_B1	A01	Fri Jan 15 17:22:13 EST 2021	219244	nerna_ss_screen_review	UAS_Chrimson_Venus_X_0070	Rubin	attP40; attP2	Sample#2890082375281147937	f	Rubin	Aljoscha Nern	GMR_SS00384	GMR_SS00384-20201218_51_B1	Drosophila melanogaster	20x	w; 84F02-p65ADZp in attP40; 87B02-ZpGdbd in attP2
SS00384	20201218_51_E1	A01	Fri Jan 15 17:22:09 EST 2021	219244	nerna_ss_screen_review	UAS_Chrimson_Venus_X_0070	Rubin	attP40; attP2	Sample#2890082360617861153	m	Rubin	Aljoscha Nern	GMR_SS00384	GMR_SS00384-20201218_51_E1	Drosophila melanogaster	20x	w; 84F02-p65ADZp in attP40; 87B02-ZpGdbd in attP2
SS00385	20220520_46_C1	A01	Tue Jun 07 15:05:07 EDT 2022	246498	nerna_ss_screen_review	UAS_Chrimson_Venus_X_0070	Rubin	attP40; attP2	Sample#3074125811633094754	f	Rubin	Aljoscha Nern	GMR_SS00385	GMR_SS00385-20220520_46_C1	Drosophila melanogaster	20x	w; 84F07-p65ADZp in attP40; 70E04-ZpGdbd in attP2
SS00385	20220520_46_E3	A01	Tue Jun 07 15:08:38 EDT 2022	246498	nerna_ss_screen_review	UAS_Chrimson_Venus_X_0070	Rubin	attP40; attP2	Sample#3074126695188398178	m	Rubin	Aljoscha Nern	GMR_SS00385	GMR_SS00385-20220520_46_E3	Drosophila melanogaster	20x	w; 84F07-p65ADZp in attP40; 70E04-ZpGdbd in attP2
SS00395	20230203_46_F2	A01	Tue Feb 14 17:18:38 EST 2023	254152	nerna_ss_screen_review	UAS_Chrimson_Venus_X_0070	Rubin	attP40; attP2	Sample#3165496251542143135	f	Rubin	Aljoscha Nern	GMR_SS00395	GMR_SS00395-20230203_46_F2	Drosophila melanogaster	20x	w; 92C07-p65ADZp in attP40; 48F12-ZpGdbd in attP2
SS00395	20230203_47_D2	A01	Thu Feb 23 11:33:07 EST 2023	254152	nerna_ss_screen_review	UAS_Chrimson_Venus_X_0070	Rubin	attP40; attP2	Sample#3168670792187642015	m	Rubin	Aljoscha Nern	GMR_SS00395	GMR_SS00395-20230203_47_D2	Drosophila melanogaster	20x	w; 92C07-p65ADZp in attP40; 48F12-ZpGdbd in attP2
SS00399	20230421_45_A1	A01	Mon May 01 16:53:36 EDT 2023	256180	nerna_ss_screen_review	UAS_Chrimson_Venus_X_0070	Rubin	attP40; attP2	Sample#3193016331775508639	f	Rubin	Aljoscha Nern	GMR_SS00399	GMR_SS00399-20230421_45_A1	Drosophila melanogaster	20x	w; 94E02-p65ADZp in attP40; 32D10-ZpGdbd in attP2/TM6B
SS00399	20230421_45_C5	A01	Mon May 01 16:53:37 EDT 2023	256180	nerna_ss_screen_review	UAS_Chrimson_Venus_X_0070	Rubin	attP40; attP2	Sample#3193016334547943583	m	Rubin	Aljoscha Nern	GMR_SS00399	GMR_SS00399-20230421_45_C5	Drosophila melanogaster	20x	w; 94E02-p65ADZp in attP40; 32D10-ZpGdbd in attP2/TM6B
SS00445	20230120_44_A1	A01	Thu Feb 02 13:19:07 EST 2023	253374	asoy_ss_screen_review	UAS_Chrimson_Venus_X_0070	Aso	attP40; attP2	Sample#3161087322884145250	f	Aso	Yoshi Aso	GMR_SS00445	GMR_SS00445-20230120_44_A1	Drosophila melanogaster	20x	w; 10G02-p65ADZp in attP40; 24A01-ZpGdbd in attP2
SS00445	20230120_44_D2	A01	Thu Feb 02 13:19:08 EST 2023	253374	asoy_ss_screen_review	UAS_Chrimson_Venus_X_0070	Aso	attP40; attP2	Sample#3161087325023240290	m	Aso	Yoshi Aso	GMR_SS00445	GMR_SS00445-20230120_44_D2	Drosophila melanogaster	20x	w; 10G02-p65ADZp in attP40; 24A01-ZpGdbd in attP2
SS00447	20230113_42_A3	A01	Mon Jan 30 14:00:39 EST 2023	253375	asoy_ss_screen_review	UAS_Chrimson_Venus_X_0070	Aso	attP40; attP2	Sample#3160010609869717602	f	Aso	Yoshi Aso	GMR_SS00447	GMR_SS00447-20230113_42_A3	Drosophila melanogaster	20x	w[1118]; P{y[+t7.7] w[+mC]=R10H10-p65.AD}attP40/CyO; P{y[+t7.7] w[+mC]=R25A08-GAL4.DBD}attP2
SS00447	20230120_44_D3	A01	Thu Feb 02 13:19:08 EST 2023	253375	asoy_ss_screen_review	UAS_Chrimson_Venus_X_0070	Aso	attP40; attP2	Sample#3161087325132292194	m	Aso	Yoshi Aso	GMR_SS00447	GMR_SS00447-20230120_44_D3	Drosophila melanogaster	20x	w[1118]; P{y[+t7.7] w[+mC]=R10H10-p65.AD}attP40/CyO; P{y[+t7.7] w[+mC]=R25A08-GAL4.DBD}attP2
SS00455	20230113_42_A2	A01	Mon Jan 30 14:00:39 EST 2023	253376	asoy_ss_screen_review	UAS_Chrimson_Venus_X_0070	Aso	attP40; attP2	Sample#3160010609756471394	f	Aso	Yoshi Aso	GMR_SS00455	GMR_SS00455-20230113_42_A2	Drosophila melanogaster	20x	w; 12E07-p65ADZp in attP40/CyO,Tb; 74F07-ZpGdbd in attP2
SS00455	20230113_42_D3	A01	Mon Jan 30 14:00:40 EST 2023	253376	asoy_ss_screen_review	UAS_Chrimson_Venus_X_0070	Aso	attP40; attP2	Sample#3160010611891372130	m	Aso	Yoshi Aso	GMR_SS00455	GMR_SS00455-20230113_42_D3	Drosophila melanogaster	20x	w; 12E07-p65ADZp in attP40/CyO,Tb; 74F07-ZpGdbd in attP2
SS00459	20230421_46_C2	A01	Tue May 02 09:33:05 EDT 2023	256156	asoy_ss_screen_review	UAS_Chrimson_Venus_X_0070	Aso	attP40; attP2	Sample#3193267860038221983	f	Aso	Yoshi Aso	GMR_SS00459	GMR_SS00459-20230421_46_C2	Drosophila melanogaster	20x	w; 14B07-p65ADZp in attP40; 94D12-ZpGdbd in attP2
SS00459	20230421_46_F3	A01	Tue May 02 09:33:06 EDT 2023	256156	asoy_ss_screen_review	UAS_Chrimson_Venus_X_0070	Aso	attP40; attP2	Sample#3193267863284613279	m	Aso	Yoshi Aso	GMR_SS00459	GMR_SS00459-20230421_46_F3	Drosophila melanogaster	20x	w; 14B07-p65ADZp in attP40; 94D12-ZpGdbd in attP2
SS00470	20230113_42_A5	A01	Mon Jan 30 14:00:39 EST 2023	253378	asoy_ss_screen_review	UAS_Chrimson_Venus_X_0070	Aso	attP40; attP2	Sample#3160010610096210018	f	Aso	Yoshi Aso	GMR_SS00470	GMR_SS00470-20230113_42_A5	Drosophila melanogaster	20x	w; 16E11-p65ADZp in attP40/CyO,Tb; 18G01-ZpGdbd in attP2/TM6B
SS00470	20230120_44_D5	A01	Thu Feb 02 13:19:08 EST 2023	253378	asoy_ss_screen_review	UAS_Chrimson_Venus_X_0070	Aso	attP40; attP2	Sample#3161087325362978914	m	Aso	Yoshi Aso	GMR_SS00470	GMR_SS00470-20230120_44_D5	Drosophila melanogaster	20x	w; 16E11-p65ADZp in attP40/CyO,Tb; 18G01-ZpGdbd in attP2/TM6B
SS00486	20200710_41_B3	A01	Sat Jul 25 05:57:37 EDT 2020	212404	asoy_ss_screen_review	UAS_Chrimson_Venus_X_0070	Rubin	attP40; attP2	Sample#2826839500750061666	f			GMR_SS00486	GMR_SS00486-20200710_41_B3	Drosophila melanogaster	20x	w; 24C04-p65ADZp in attP40/CyO,Tb; 47A11-ZpGdbd in attP2
SS00486	20200710_42_B2	A01	Fri Jul 24 14:16:40 EDT 2020	212404	asoy_ss_screen_review	UAS_Chrimson_Venus_X_0070	Rubin	attP40; attP2	Sample#2826602703256289378	m			GMR_SS00486	GMR_SS00486-20200710_42_B2	Drosophila melanogaster	20x	w; 24C04-p65ADZp in attP40/CyO,Tb; 47A11-ZpGdbd in attP2
SS00502	20230113_42_A6	A01	Mon Jan 30 14:00:39 EST 2023	253379	asoy_ss_screen_review	UAS_Chrimson_Venus_X_0070	Aso	attP40; attP2	Sample#3160010610205261922	f	Aso	Yoshi Aso	GMR_SS00502	GMR_SS00502-20230113_42_A6	Drosophila melanogaster	20x	w; 25B07-p65ADZp in attP40; 45F12-ZpGdbd in attP2
SS00502	20230113_42_D4	A01	Mon Jan 30 14:00:40 EST 2023	253379	asoy_ss_screen_review	UAS_Chrimson_Venus_X_0070	Aso	attP40; attP2	Sample#3160010612000424034	m	Aso	Yoshi Aso	GMR_SS00502	GMR_SS00502-20230113_42_D4	Drosophila melanogaster	20x	w; 25B07-p65ADZp in attP40; 45F12-ZpGdbd in attP2
SS00503	20230113_42_B1	A01	Mon Jan 30 14:00:39 EST 2023	253380	asoy_ss_screen_review	UAS_Chrimson_Venus_X_0070	Aso	attP40; attP2	Sample#3160010610314313826	f	Aso	Yoshi Aso	GMR_SS00503	GMR_SS00503-20230113_42_B1	Drosophila melanogaster	20x	w; 25B07-p65ADZp in attP40; 51D04-ZpGdbd in attP2
SS00503	20230113_42_D5	A01	Mon Jan 30 14:00:40 EST 2023	253380	asoy_ss_screen_review	UAS_Chrimson_Venus_X_0070	Aso	attP40; attP2	Sample#3160010612109475938	m	Aso	Yoshi Aso	GMR_SS00503	GMR_SS00503-20230113_42_D5	Drosophila melanogaster	20x	w; 25B07-p65ADZp in attP40; 51D04-ZpGdbd in attP2
SS00525	20230120_44_C6	A01	Thu Feb 02 13:19:08 EST 2023	253409	asoy_ss_screen_review	UAS_Chrimson_Venus_X_0070	Aso	VK00027, attP2	Sample#3161087324800942178	f	Aso	Yoshi Aso	GMR_SS00525	GMR_SS00525-20230120_44_C6	Drosophila melanogaster	20x	w;; 30H02-p65ADZp in VK00027, 33E02-ZpGdbd in attP2
SS00525	20230120_44_G4	A01	Thu Feb 02 13:19:08 EST 2023	253409	asoy_ss_screen_review	UAS_Chrimson_Venus_X_0070	Aso	VK00027, attP2	Sample#3161087327183306850	m	Aso	Yoshi Aso	GMR_SS00525	GMR_SS00525-20230120_44_G4	Drosophila melanogaster	20x	w;; 30H02-p65ADZp in VK00027, 33E02-ZpGdbd in attP2
SS00532	20230421_46_C3	A01	Tue May 02 09:33:05 EDT 2023	256157	asoy_ss_screen_review	UAS_Chrimson_Venus_X_0070	Aso	VK00027, attP2	Sample#3193267860210188447	f	Aso	Yoshi Aso	GMR_SS00532	GMR_SS00532-20230421_46_C3	Drosophila melanogaster	20x	w;; 31F03-p65ADZp in VK00027, 56B05-ZpGdbd in attP2
SS00532	20230421_46_F4	A01	Tue May 02 09:33:06 EDT 2023	256157	asoy_ss_screen_review	UAS_Chrimson_Venus_X_0070	Aso	VK00027, attP2	Sample#3193267863452385439	m	Aso	Yoshi Aso	GMR_SS00532	GMR_SS00532-20230421_46_F4	Drosophila melanogaster	20x	w;; 31F03-p65ADZp in VK00027, 56B05-ZpGdbd in attP2
SS00550	20201016_42_D5	A01	Wed Nov 04 14:55:37 EST 2020	214779	asoy_ss_screen_review	UAS_Chrimson_Venus_X_0070	Rubin	attP40; attP2	Sample#2863953556501692514	f			GMR_SS00550	GMR_SS00550-20201016_42_D5	Drosophila melanogaster	20x	w; 37A12-p65ADZp in attP40/CyO,Tb; 27H08-ZpGdbd in attP2
SS00550	20201016_42_H4	A01	Wed Nov 04 14:55:37 EST 2020	214779	asoy_ss_screen_review	UAS_Chrimson_Venus_X_0070	Rubin	attP40; attP2	Sample#2863953557860647010	m			GMR_SS00550	GMR_SS00550-20201016_42_H4	Drosophila melanogaster	20x	w; 37A12-p65ADZp in attP40/CyO,Tb; 27H08-ZpGdbd in attP2
SS00560	20230120_44_A2	A01	Thu Feb 02 13:19:07 EST 2023	253382	asoy_ss_screen_review	UAS_Chrimson_Venus_X_0070	Aso	attP40; attP2	Sample#3161087323022557282	f	Aso	Yoshi Aso	GMR_SS00560	GMR_SS00560-20230120_44_A2	Drosophila melanogaster	20x	w; 38E07-p65ADZp in attP40/CyO,Tb; 51D04-ZpGdbd in attP2/TM6B
SS00560	20230120_44_D6	A01	Thu Feb 02 13:19:08 EST 2023	253382	asoy_ss_screen_review	UAS_Chrimson_Venus_X_0070	Aso	attP40; attP2	Sample#3161087325472030818	m	Aso	Yoshi Aso	GMR_SS00560	GMR_SS00560-20230120_44_D6	Drosophila melanogaster	20x	w; 38E07-p65ADZp in attP40/CyO,Tb; 51D04-ZpGdbd in attP2/TM6B
SS00589	20230113_42_B3	A01	Mon Jan 30 14:00:39 EST 2023	253383	asoy_ss_screen_review	UAS_Chrimson_Venus_X_0070	Aso	attP40; attP2	Sample#3160010610549194850	f	Aso	Yoshi Aso	GMR_SS00589	GMR_SS00589-20230113_42_B3	Drosophila melanogaster	20x	w; 50H07-p65ADZp in attP40/CyO,Tb; 80B04-ZpGdbd in attP2
SS00589	20230113_42_E1	A01	Mon Jan 30 14:00:40 EST 2023	253383	asoy_ss_screen_review	UAS_Chrimson_Venus_X_0070	Aso	attP40; attP2	Sample#3160010612331774050	m	Aso	Yoshi Aso	GMR_SS00589	GMR_SS00589-20230113_42_E1	Drosophila melanogaster	20x	w; 50H07-p65ADZp in attP40/CyO,Tb; 80B04-ZpGdbd in attP2
SS00603	20230113_42_B4	A01	Mon Jan 30 14:00:39 EST 2023	253384	asoy_ss_screen_review	UAS_Chrimson_Venus_X_0070	Aso	attP40; attP2	Sample#3160010610658246754	f	Aso	Yoshi Aso	GMR_SS00603	GMR_SS00603-20230113_42_B4	Drosophila melanogaster	20x	w; 55F02-p65ADZp in attP40/CyO,Tb; 34A03-ZpGdbd in attP2
SS00603	20230113_42_E2	A01	Mon Jan 30 14:00:40 EST 2023	253384	asoy_ss_screen_review	UAS_Chrimson_Venus_X_0070	Aso	attP40; attP2	Sample#3160010612440825954	m	Aso	Yoshi Aso	GMR_SS00603	GMR_SS00603-20230113_42_E2	Drosophila melanogaster	20x	w; 55F02-p65ADZp in attP40/CyO,Tb; 34A03-ZpGdbd in attP2
SS00612	20230721_47_B6	A01	Thu Aug 03 16:43:05 EDT 2023	258671	asoy_ss_screen_review	UAS_Chrimson_Venus_X_0070	Aso	attP40; attP2	Sample#3227078143810470047	f	Aso	Yoshi Aso	GMR_SS00612	GMR_SS00612-20230721_47_B6	Drosophila melanogaster	20x	w; 60A10-p65ADZp in attP40; 95H02-ZpGdbd in attP2/TM2
SS00612	20230721_47_F1	A01	Thu Aug 03 16:43:05 EDT 2023	258671	asoy_ss_screen_review	UAS_Chrimson_Venus_X_0070	Aso	attP40; attP2	Sample#3227078144431227039	m	Aso	Yoshi Aso	GMR_SS00612	GMR_SS00612-20230721_47_F1	Drosophila melanogaster	20x	w; 60A10-p65ADZp in attP40; 95H02-ZpGdbd in attP2/TM2
SS00645	20200918_45_G2	A01	Thu Oct 01 10:18:36 EDT 2020	214074	nerna_ss_screen_review	UAS_Chrimson_Venus_X_0070	Rubin	attP40; attP2	Sample#2851547555647455330	m			GMR_SS00645	GMR_SS00645-20200918_45_G2	Drosophila melanogaster	20x	w; 61G12-p65ADZp in attP40; 10H10-ZpGdbd in attP2
SS00645	20200918_45_G4	A01	Thu Oct 01 10:18:36 EDT 2020	214074	nerna_ss_screen_review	UAS_Chrimson_Venus_X_0070	Rubin	attP40; attP2	Sample#2851547556431790178	f			GMR_SS00645	GMR_SS00645-20200918_45_G4	Drosophila melanogaster	20x	w; 61G12-p65ADZp in attP40; 10H10-ZpGdbd in attP2
SS00651	20220422_45_F3	A01	Thu May 05 12:45:08 EDT 2022	245662	nerna_ss_screen_review	UAS_Chrimson_Venus_X_0070	Rubin	attP40; attP2	Sample#3062131781902794850	f	Rubin	Aljoscha Nern	GMR_SS00651	GMR_SS00651-20220422_45_F3	Drosophila melanogaster	20x	w; 61G12-p65ADZp in attP40; 71G01-ZpGdbd in attP2
SS00651	20220422_46_F3	A01	Thu May 05 15:43:37 EDT 2022	245662	nerna_ss_screen_review	UAS_Chrimson_Venus_X_0070	Rubin	attP40; attP2	Sample#3062176697693503586	m	Rubin	Aljoscha Nern	GMR_SS00651	GMR_SS00651-20220422_46_F3	Drosophila melanogaster	20x	w; 61G12-p65ADZp in attP40; 71G01-ZpGdbd in attP2
SS00657	20220114_45_A3	A01	Wed Jan 26 13:35:10 EST 2022	242594	nerna_ss_screen_review	UAS_Chrimson_Venus_X_0070	Rubin	attP40; attP2	Sample#3026283074770960482	f	Rubin	Aljoscha Nern	GMR_SS00657	GMR_SS00657-20220114_45_A3	Drosophila melanogaster	20x	w; 23E12-p65ADZp in attP40; 55B04-ZpGdbd in attP2
SS00657	20220114_45_A6	A01	Wed Jan 26 13:35:10 EST 2022	242594	nerna_ss_screen_review	UAS_Chrimson_Venus_X_0070	Rubin	attP40; attP2	Sample#3026283075324608610	m	Rubin	Aljoscha Nern	GMR_SS00657	GMR_SS00657-20220114_45_A6	Drosophila melanogaster	20x	w; 23E12-p65ADZp in attP40; 55B04-ZpGdbd in attP2
SS00681	20220422_45_F4	A01	Thu May 05 12:45:08 EDT 2022	245663	nerna_ss_screen_review	UAS_Chrimson_Venus_X_0070	Rubin	attP40; attP2	Sample#3062131782007652450	f	Rubin	Aljoscha Nern	GMR_SS00681	GMR_SS00681-20220422_45_F4	Drosophila melanogaster	20x	w; 65B09-p65ADZp in attP40; 18D09-ZpGdbd in attP2
SS00681	20220422_46_F4	A01	Thu May 05 15:43:37 EDT 2022	245663	nerna_ss_screen_review	UAS_Chrimson_Venus_X_0070	Rubin	attP40; attP2	Sample#3062176697802555490	m	Rubin	Aljoscha Nern	GMR_SS00681	GMR_SS00681-20220422_46_F4	Drosophila melanogaster	20x	w; 65B09-p65ADZp in attP40; 18D09-ZpGdbd in attP2
SS00688	20200821_41_B1	A01	Thu Sep 03 11:09:36 EDT 2020	213139	nerna_ss_screen_review	UAS_Chrimson_Venus_X_0070	Rubin	attP40; attP2	Sample#2841413531960606818	f			GMR_SS00688	GMR_SS00688-20200821_41_B1	Drosophila melanogaster	20x	w; 26H02-p65ADZp in attP40/CyO::Tb-RFP; 29G11-ZpGdbd in attP2/TM6B
SS00688	20200821_41_D1	A01	Thu Sep 03 11:09:38 EDT 2020	213139	nerna_ss_screen_review	UAS_Chrimson_Venus_X_0070	Rubin	attP40; attP2	Sample#2841413537329315938	m			GMR_SS00688	GMR_SS00688-20200821_41_D1	Drosophila melanogaster	20x	w; 26H02-p65ADZp in attP40/CyO::Tb-RFP; 29G11-ZpGdbd in attP2/TM6B
SS00689	20220128_47_A3	A01	Thu Feb 10 15:05:06 EST 2022	243609	nerna_ss_screen_review	UAS_Chrimson_Venus_X_0070	Rubin	attP40; attP2	Sample#3031741524317569122	f	Rubin	Aljoscha Nern	GMR_SS00689	GMR_SS00689-20220128_47_A3	Drosophila melanogaster	20x	w; 11G01-p65ADZp in attP40; 15G08-ZpGdbd in attP2
SS00689	20220128_47_A6	A01	Thu Feb 10 15:05:06 EST 2022	243609	nerna_ss_screen_review	UAS_Chrimson_Venus_X_0070	Rubin	attP40; attP2	Sample#3031741524535672930	m	Rubin	Aljoscha Nern	GMR_SS00689	GMR_SS00689-20220128_47_A6	Drosophila melanogaster	20x	w; 11G01-p65ADZp in attP40; 15G08-ZpGdbd in attP2
SS00690	20230203_46_F3	A01	Tue Feb 14 17:18:38 EST 2023	254154	nerna_ss_screen_review	UAS_Chrimson_Venus_X_0070	Rubin	attP40; attP2	Sample#3165496251642806431	f	Rubin	Aljoscha Nern	GMR_SS00690	GMR_SS00690-20230203_46_F3	Drosophila melanogaster	20x	w; 82F12-p65ADZp in attP40; 75H08-ZpGdbd in attP2
SS00690	20230203_47_D3	A01	Thu Feb 23 11:33:07 EST 2023	254154	nerna_ss_screen_review	UAS_Chrimson_Venus_X_0070	Rubin	attP40; attP2	Sample#3168670792288305311	m	Rubin	Aljoscha Nern	GMR_SS00690	GMR_SS00690-20230203_47_D3	Drosophila melanogaster	20x	w; 82F12-p65ADZp in attP40; 75H08-ZpGdbd in attP2
SS00692	20201030_46_J2	A01	Thu Nov 19 05:58:01 EST 2020	215753	nerna_ss_screen_review	UAS_Chrimson_Venus_X_0070	Rubin	attP40; attP2	Sample#2869254082915205218	m			GMR_SS00692	GMR_SS00692-20201030_46_J2	Drosophila melanogaster	20x	w; 64B07-p65ADZp in attP40; 37E10-ZpGdbd in attP2
SS00692	20201030_46_J3	A01	Thu Nov 19 05:58:01 EST 2020	215753	nerna_ss_screen_review	UAS_Chrimson_Venus_X_0070	Rubin	attP40; attP2	Sample#2869254082323808354	f			GMR_SS00692	GMR_SS00692-20201030_46_J3	Drosophila melanogaster	20x	w; 64B07-p65ADZp in attP40; 37E10-ZpGdbd in attP2
SS00695	20230421_45_B3	A01	Mon May 01 16:53:37 EDT 2023	256181	nerna_ss_screen_review	UAS_Chrimson_Venus_X_0070	Rubin	attP40; attP2	Sample#3193016333176406175	f	Rubin	Aljoscha Nern	GMR_SS00695	GMR_SS00695-20230421_45_B3	Drosophila melanogaster	20x	w; 59A05-p65ADZp in attP40; 75H07-ZpGdbd in attP2
SS00695	20230421_45_E1	A01	Mon May 01 16:53:37 EDT 2023	256181	nerna_ss_screen_review	UAS_Chrimson_Venus_X_0070	Rubin	attP40; attP2	Sample#3193016335927869599	m	Rubin	Aljoscha Nern	GMR_SS00695	GMR_SS00695-20230421_45_E1	Drosophila melanogaster	20x	w; 59A05-p65ADZp in attP40; 75H07-ZpGdbd in attP2
SS00696	20200821_41_B3	A01	Thu Sep 03 11:09:37 EDT 2020	213141	nerna_ss_screen_review	UAS_Chrimson_Venus_X_0070	Rubin	attP40; attP2	Sample#2841413532682027106	f			GMR_SS00696	GMR_SS00696-20200821_41_B3	Drosophila melanogaster	20x	w; 64B03-p65ADZp in attP40; 14B07-ZpGdbd in attP2
SS00696	20200821_41_D3	A01	Thu Sep 03 11:09:38 EDT 2020	213141	nerna_ss_screen_review	UAS_Chrimson_Venus_X_0070	Rubin	attP40; attP2	Sample#2841413538273034338	m			GMR_SS00696	GMR_SS00696-20200821_41_D3	Drosophila melanogaster	20x	w; 64B03-p65ADZp in attP40; 14B07-ZpGdbd in attP2
SS00698	20200821_41_B4	A01	Thu Sep 03 11:09:37 EDT 2020	213142	nerna_ss_screen_review	UAS_Chrimson_Venus_X_0070	Rubin	attP40; attP2	Sample#2841413533160177762	f			GMR_SS00698	GMR_SS00698-20200821_41_B4	Drosophila melanogaster	20x	w; 11D03-p65ADZp in attP40; 19C10-ZpGdbd in attP2
SS00698	20200821_41_D4	A01	Thu Sep 03 11:09:38 EDT 2020	213142	nerna_ss_screen_review	UAS_Chrimson_Venus_X_0070	Rubin	attP40; attP2	Sample#2841413538671493218	m			GMR_SS00698	GMR_SS00698-20200821_41_D4	Drosophila melanogaster	20x	w; 11D03-p65ADZp in attP40; 19C10-ZpGdbd in attP2
SS00700	20230203_46_F4	A01	Tue Feb 14 17:18:38 EST 2023	254156	nerna_ss_screen_review	UAS_Chrimson_Venus_X_0070	Rubin	attP40; attP2	Sample#3165496251751858335	f	Rubin	Aljoscha Nern	GMR_SS00700	GMR_SS00700-20230203_46_F4	Drosophila melanogaster	20x	w; 31F10-p65ADZp in attP40; 65D07-ZpGdbd in attP2
SS00700	20230203_47_D4	A01	Thu Feb 23 11:33:07 EST 2023	254156	nerna_ss_screen_review	UAS_Chrimson_Venus_X_0070	Rubin	attP40; attP2	Sample#3168670792393162911	m	Rubin	Aljoscha Nern	GMR_SS00700	GMR_SS00700-20230203_47_D4	Drosophila melanogaster	20x	w; 31F10-p65ADZp in attP40; 65D07-ZpGdbd in attP2
SS00705	20220422_45_G4	A01	Thu May 05 12:45:08 EDT 2022	245699	nerna_ss_screen_review	UAS_Chrimson_Venus_X_0070	Rubin	attP40; attP2	Sample#3062131782745849954	f	Rubin	Aljoscha Nern	GMR_SS00705	GMR_SS00705-20220422_45_G4	Drosophila melanogaster	20x	w; 52G05-p65ADZp in attP40; 56G08-ZpGdbd in attP2
SS00705	20220422_46_G4	A01	Thu May 05 15:43:37 EDT 2022	245699	nerna_ss_screen_review	UAS_Chrimson_Venus_X_0070	Rubin	attP40; attP2	Sample#3062176698427506786	m	Rubin	Aljoscha Nern	GMR_SS00705	GMR_SS00705-20220422_46_G4	Drosophila melanogaster	20x	w; 52G05-p65ADZp in attP40; 56G08-ZpGdbd in attP2
SS00724	20210521_44_E1	A01	Fri Jun 04 12:36:36 EDT 2021	227754	ditp_ss_screen_review	UAS_Chrimson_Venus_X_0070	Card	attP40; attP2	Sample#2940729701603213410	f	Descending Interneuron	Shigehiro Namiki	GMR_SS00724	GMR_SS00724-20210521_44_E1	Drosophila melanogaster	20x	w; 31B08-p65ADZp in attP40; 24A03-ZpGdbd in attP2
SS00724	20210521_44_J1	A01	Fri Jun 04 12:36:37 EDT 2021	227754	ditp_ss_screen_review	UAS_Chrimson_Venus_X_0070	Card	attP40; attP2	Sample#2940729703289323618	m	Descending Interneuron	Shigehiro Namiki	GMR_SS00724	GMR_SS00724-20210521_44_J1	Drosophila melanogaster	20x	w; 31B08-p65ADZp in attP40; 24A03-ZpGdbd in attP2
SS00727	20191218_47_E3	A01	Sat Jan 18 11:10:41 EST 2020	205455	ditp_ss_screen_review	UAS_Chrimson_Venus_X_0070	Card	attP40; attP2	Sample#2758442079678890082	m			GMR_SS00727	GMR_SS00727-20191218_47_E3	Drosophila melanogaster	20x	w; 14A01-p65ADZp in attP40/CyO; 79H02-ZpGdbd in attP2
SS00727	20191218_48_E3	A01	Thu Jan 23 15:43:09 EST 2020	205455	ditp_ss_screen_review	UAS_Chrimson_Venus_X_0070	Card	attP40; attP2	Sample#2760322590672158818	f			GMR_SS00727	GMR_SS00727-20191218_48_E3	Drosophila melanogaster	20x	w; 14A01-p65ADZp in attP40/CyO; 79H02-ZpGdbd in attP2
SS00728	20210219_41_C6	A01	Wed Mar 10 13:11:20 EST 2021	219879	ditp_ss_screen_review	UAS_Chrimson_Venus_X_0070	Card	attP40; attP2	Sample#2909588184591499362	f	Descending Interneuron	Shigehiro Namiki	GMR_SS00728	GMR_SS00728-20210219_41_C6	Drosophila melanogaster	20x	w; 25C08-p65ADZp in attP40; 79H02-ZpGdbd in attP2
SS00728	20210219_41_H6	A01	Wed Mar 10 13:11:21 EST 2021	219879	ditp_ss_screen_review	UAS_Chrimson_Venus_X_0070	Card	attP40; attP2	Sample#2909588188416704610	m	Descending Interneuron	Shigehiro Namiki	GMR_SS00728	GMR_SS00728-20210219_41_H6	Drosophila melanogaster	20x	w; 25C08-p65ADZp in attP40; 79H02-ZpGdbd in attP2
SS00729	20201016_42_B6	A01	Wed Nov 04 14:24:39 EST 2020	214798	ditp_ss_screen_review	UAS_Chrimson_Venus_X_0070	Card	attP40; attP2	Sample#2863945761186381922	f			GMR_SS00729	GMR_SS00729-20201016_42_B6	Drosophila melanogaster	20x	w; 58G11-p65ADZp in attP40; 81D05-ZpGdbd in attP2
SS00729	20201016_42_F6	A01	Wed Nov 04 14:31:41 EST 2020	214798	ditp_ss_screen_review	UAS_Chrimson_Venus_X_0070	Card	attP40; attP2	Sample#2863947531887312994	m			GMR_SS00729	GMR_SS00729-20201016_42_F6	Drosophila melanogaster	20x	w; 58G11-p65ADZp in attP40; 81D05-ZpGdbd in attP2
SS00730	20191218_47_D5	A01	Sat Jan 18 11:11:10 EST 2020	205450	ditp_ss_screen_review	UAS_Chrimson_Venus_X_0070	Card	attP40; attP2	Sample#2758442203717042274	m			GMR_SS00730	GMR_SS00730-20191218_47_D5	Drosophila melanogaster	20x	w; 75C10-p65ADZp in attP40; 87D07-ZpGdbd in attP2/TM6B
SS00730	20191218_48_D5	A01	Thu Jan 23 15:43:09 EST 2020	205450	ditp_ss_screen_review	UAS_Chrimson_Venus_X_0070	Card	attP40; attP2	Sample#2760322589757800546	f			GMR_SS00730	GMR_SS00730-20191218_48_D5	Drosophila melanogaster	20x	w; 75C10-p65ADZp in attP40; 87D07-ZpGdbd in attP2/TM6B
SS00731	20191218_47_D6	A01	Sat Jan 18 11:11:10 EST 2020	205451	ditp_ss_screen_review	UAS_Chrimson_Venus_X_0070	Card	attP40; attP2	Sample#2758442203922563170	m			GMR_SS00731	GMR_SS00731-20191218_47_D6	Drosophila melanogaster	20x	w; 22C05-p65ADZp in attP40; 56G08-ZpGdbd in attP2
SS00731	20191218_48_D6	A01	Thu Jan 23 15:43:09 EST 2020	205451	ditp_ss_screen_review	UAS_Chrimson_Venus_X_0070	Card	attP40; attP2	Sample#2760322589992681570	f			GMR_SS00731	GMR_SS00731-20191218_48_D6	Drosophila melanogaster	20x	w; 22C05-p65ADZp in attP40; 56G08-ZpGdbd in attP2
SS00732	20201016_42_C1	A01	Wed Nov 04 14:24:39 EST 2020	214799	ditp_ss_screen_review	UAS_Chrimson_Venus_X_0070	Card	attP40; attP2	Sample#2863945761618395234	f			GMR_SS00732	GMR_SS00732-20201016_42_C1	Drosophila melanogaster	20x	w; 14F03-p65ADZp in attP40; 24C07-ZpGdbd in attP2
SS00732	20201016_42_G1	A01	Wed Nov 04 14:31:41 EST 2020	214799	ditp_ss_screen_review	UAS_Chrimson_Venus_X_0070	Card	attP40; attP2	Sample#2863947532222857314	m			GMR_SS00732	GMR_SS00732-20201016_42_G1	Drosophila melanogaster	20x	w; 14F03-p65ADZp in attP40; 24C07-ZpGdbd in attP2
SS00733	20210219_41_D5	A01	Wed Mar 10 13:11:20 EST 2021	219884	ditp_ss_screen_review	UAS_Chrimson_Venus_X_0070	Card	attP40; attP2	Sample#2909588185359056994	f	Descending Interneuron	Shigehiro Namiki	GMR_SS00733	GMR_SS00733-20210219_41_D5	Drosophila melanogaster	20x	w; 58E07-p65ADZp in attP40/CyO; 39H12-ZpGdbd in attP2
SS00733	20210219_41_I5	A01	Wed Mar 10 13:11:21 EST 2021	219884	ditp_ss_screen_review	UAS_Chrimson_Venus_X_0070	Card	attP40; attP2	Sample#2909588189326868578	m	Descending Interneuron	Shigehiro Namiki	GMR_SS00733	GMR_SS00733-20210219_41_I5	Drosophila melanogaster	20x	w; 58E07-p65ADZp in attP40/CyO; 39H12-ZpGdbd in attP2
SS00734	20210219_41_D1	A01	Wed Mar 10 13:11:20 EST 2021	219880	ditp_ss_screen_review	UAS_Chrimson_Venus_X_0070	Card	attP40; attP2	Sample#2909588184746688610	f	Descending Interneuron	Shigehiro Namiki	GMR_SS00734	GMR_SS00734-20210219_41_D1	Drosophila melanogaster	20x	w; 73C04-p65ADZp in attP40; 39H12-ZpGdbd in attP2
SS00734	20210219_41_I1	A01	Wed Mar 10 13:11:21 EST 2021	219880	ditp_ss_screen_review	UAS_Chrimson_Venus_X_0070	Card	attP40; attP2	Sample#2909588188563505250	m	Descending Interneuron	Shigehiro Namiki	GMR_SS00734	GMR_SS00734-20210219_41_I1	Drosophila melanogaster	20x	w; 73C04-p65ADZp in attP40; 39H12-ZpGdbd in attP2
SS00735	20200117_44_B6	A01	Wed Feb 05 15:27:11 EST 2020	206318	ditp_ss_screen_review	UAS_Chrimson_Venus_X_0070	Card	attP40; attP2	Sample#2765029611900239970	m			GMR_SS00735	GMR_SS00735-20200117_44_B6	Drosophila melanogaster	20x	w; 49A07-p65ADZp in attP40; 55A03-ZpGdbd in attP2
SS00735	20200117_44_F6	A01	Wed Feb 05 15:27:11 EST 2020	206318	ditp_ss_screen_review	UAS_Chrimson_Venus_X_0070	Card	attP40; attP2	Sample#2765029614618148962	f			GMR_SS00735	GMR_SS00735-20200117_44_F6	Drosophila melanogaster	20x	w; 49A07-p65ADZp in attP40; 55A03-ZpGdbd in attP2
SS00736	20210219_41_D4	A01	Wed Mar 10 13:11:20 EST 2021	219883	ditp_ss_screen_review	UAS_Chrimson_Venus_X_0070	Card	attP40; attP2	Sample#2909588185208062050	f	Descending Interneuron	Shigehiro Namiki	GMR_SS00736	GMR_SS00736-20210219_41_D4	Drosophila melanogaster	20x	w; 21A07-p65ADZp in attP40; 72A01-ZpGdbd in attP2
SS00736	20210219_41_I4	A01	Wed Mar 10 13:11:21 EST 2021	219883	ditp_ss_screen_review	UAS_Chrimson_Venus_X_0070	Card	attP40; attP2	Sample#2909588189146513506	m	Descending Interneuron	Shigehiro Namiki	GMR_SS00736	GMR_SS00736-20210219_41_I4	Drosophila melanogaster	20x	w; 21A07-p65ADZp in attP40; 72A01-ZpGdbd in attP2
SS00737	20210219_41_D3	A01	Wed Mar 10 13:11:20 EST 2021	219882	ditp_ss_screen_review	UAS_Chrimson_Venus_X_0070	Card	attP40; attP2	Sample#2909588185052872802	f	Descending Interneuron	Shigehiro Namiki	GMR_SS00737	GMR_SS00737-20210219_41_D3	Drosophila melanogaster	20x	w; 10A12-p65ADZp in attP40; 81E05-ZpGdbd in attP2/TM6B
SS00737	20210219_41_I3	A01	Wed Mar 10 13:11:21 EST 2021	219882	ditp_ss_screen_review	UAS_Chrimson_Venus_X_0070	Card	attP40; attP2	Sample#2909588188861300834	m	Descending Interneuron	Shigehiro Namiki	GMR_SS00737	GMR_SS00737-20210219_41_I3	Drosophila melanogaster	20x	w; 10A12-p65ADZp in attP40; 81E05-ZpGdbd in attP2/TM6B
SS00738	20210219_41_D2	A01	Wed Mar 10 13:11:20 EST 2021	219881	ditp_ss_screen_review	UAS_Chrimson_Venus_X_0070	Card	attP40; attP2	Sample#2909588184897683554	f	Descending Interneuron	Shigehiro Namiki	GMR_SS00738	GMR_SS00738-20210219_41_D2	Drosophila melanogaster	20x	w; 81D05-p65ADZp in attP40/CyO; 81E05-ZpGdbd in attP2/TM6B
SS00738	20210219_41_I2	A01	Wed Mar 10 13:11:21 EST 2021	219881	ditp_ss_screen_review	UAS_Chrimson_Venus_X_0070	Card	attP40; attP2	Sample#2909588188714500194	m	Descending Interneuron	Shigehiro Namiki	GMR_SS00738	GMR_SS00738-20210219_41_I2	Drosophila melanogaster	20x	w; 81D05-p65ADZp in attP40/CyO; 81E05-ZpGdbd in attP2/TM6B
SS00764	20221118_44_A5	A01	Tue Dec 13 11:39:36 EST 2022	252149	nerna_ss_screen_review	UAS_Chrimson_Venus_X_0070	Rubin	attP40; attP2	Sample#3142580497427726434	f	Rubin	Aljoscha Nern	GMR_SS00764	GMR_SS00764-20221118_44_A5	Drosophila melanogaster	20x	w; 24G01-p65ADZp in attP40; 50E01-ZpGdbd in attP2
SS00764	20221118_44_D1	A01	Tue Dec 13 11:39:37 EST 2022	252149	nerna_ss_screen_review	UAS_Chrimson_Venus_X_0070	Rubin	attP40; attP2	Sample#3142580499025756258	m	Rubin	Aljoscha Nern	GMR_SS00764	GMR_SS00764-20221118_44_D1	Drosophila melanogaster	20x	w; 24G01-p65ADZp in attP40; 50E01-ZpGdbd in attP2
SS00769	20220527_44_C5	A01	Thu Jun 09 09:34:09 EDT 2022	246782	nerna_ss_screen_review	UAS_Chrimson_Venus_X_0070	Rubin	attP40; attP2	Sample#3074767293721346146	f	Rubin	Aljoscha Nern	GMR_SS00769	GMR_SS00769-20220527_44_C5	Drosophila melanogaster	20x	w; 72H09-p65ADZp in attP40/CyO; 65D05-ZpGdbd in attP2
SS00769	20220527_44_F5	A01	Thu Jun 09 09:34:09 EDT 2022	246782	nerna_ss_screen_review	UAS_Chrimson_Venus_X_0070	Rubin	attP40; attP2	Sample#3074767295747194978	m	Rubin	Aljoscha Nern	GMR_SS00769	GMR_SS00769-20220527_44_F5	Drosophila melanogaster	20x	w; 72H09-p65ADZp in attP40/CyO; 65D05-ZpGdbd in attP2
SS00770	20230203_46_F5	A01	Tue Feb 14 17:18:38 EST 2023	254157	nerna_ss_screen_review	UAS_Chrimson_Venus_X_0070	Rubin	attP40; attP2	Sample#3165496251856715935	f	Rubin	Aljoscha Nern	GMR_SS00770	GMR_SS00770-20230203_46_F5	Drosophila melanogaster	20x	w; 95F09-p65ADZp in attP40; 27A10-ZpGdbd in attP2
SS00770	20230203_47_D5	A01	Thu Feb 23 11:33:07 EST 2023	254157	nerna_ss_screen_review	UAS_Chrimson_Venus_X_0070	Rubin	attP40; attP2	Sample#3168670792498020511	m	Rubin	Aljoscha Nern	GMR_SS00770	GMR_SS00770-20230203_47_D5	Drosophila melanogaster	20x	w; 95F09-p65ADZp in attP40; 27A10-ZpGdbd in attP2
SS00771	20230203_46_F6	A01	Tue Feb 14 17:18:38 EST 2023	254158	nerna_ss_screen_review	UAS_Chrimson_Venus_X_0070	Rubin	attP40; attP2	Sample#3165496251961573535	f	Rubin	Aljoscha Nern	GMR_SS00771	GMR_SS00771-20230203_46_F6	Drosophila melanogaster	20x	w; 11D03-p65ADZp in attP40; 61H02-ZpGdbd in attP2
SS00771	20230203_47_D6	A01	Thu Feb 23 11:33:08 EST 2023	254158	nerna_ss_screen_review	UAS_Chrimson_Venus_X_0070	Rubin	attP40; attP2	Sample#3168670792602878111	m	Rubin	Aljoscha Nern	GMR_SS00771	GMR_SS00771-20230203_47_D6	Drosophila melanogaster	20x	w; 11D03-p65ADZp in attP40; 61H02-ZpGdbd in attP2
SS00772	20230203_46_G1	A01	Tue Feb 14 17:18:38 EST 2023	254159	nerna_ss_screen_review	UAS_Chrimson_Venus_X_0070	Rubin	attP40; attP2	Sample#3165496252066431135	f	Rubin	Aljoscha Nern	GMR_SS00772	GMR_SS00772-20230203_46_G1	Drosophila melanogaster	20x	w; 11G01-p65ADZp in attP40; 17C11-ZpGdbd in attP2
SS00772	20230203_47_E1	A01	Thu Feb 23 11:33:08 EST 2023	254159	nerna_ss_screen_review	UAS_Chrimson_Venus_X_0070	Rubin	attP40; attP2	Sample#3168670792711930015	m	Rubin	Aljoscha Nern	GMR_SS00772	GMR_SS00772-20230203_47_E1	Drosophila melanogaster	20x	w; 11G01-p65ADZp in attP40; 17C11-ZpGdbd in attP2
SS00778	20200821_41_B5	A01	Thu Sep 03 11:09:37 EDT 2020	213143	nerna_ss_screen_review	UAS_Chrimson_Venus_X_0070	Rubin	attP40; attP2	Sample#2841413533638328418	f			GMR_SS00778	GMR_SS00778-20200821_41_B5	Drosophila melanogaster	20x	w; 20C11-p65ADZp in attP40; 25B02-ZpGdbd in attP2
SS00778	20200821_41_D5	A01	Thu Sep 03 11:09:38 EDT 2020	213143	nerna_ss_screen_review	UAS_Chrimson_Venus_X_0070	Rubin	attP40; attP2	Sample#2841413539032203362	m			GMR_SS00778	GMR_SS00778-20200821_41_D5	Drosophila melanogaster	20x	w; 20C11-p65ADZp in attP40; 25B02-ZpGdbd in attP2
SS00779	20200821_41_B6	A01	Thu Sep 03 11:09:37 EDT 2020	213144	nerna_ss_screen_review	UAS_Chrimson_Venus_X_0070	Rubin	attP40; attP2	Sample#2841413534074536034	f			GMR_SS00779	GMR_SS00779-20200821_41_B6	Drosophila melanogaster	20x	w; 20C11-p65ADZp in attP40; 48D11-ZpGdbd in attP2
SS00779	20200821_41_E1	A01	Thu Sep 03 11:09:38 EDT 2020	213144	nerna_ss_screen_review	UAS_Chrimson_Venus_X_0070	Rubin	attP40; attP2	Sample#2841413539464216674	m			GMR_SS00779	GMR_SS00779-20200821_41_E1	Drosophila melanogaster	20x	w; 20C11-p65ADZp in attP40; 48D11-ZpGdbd in attP2
SS00781	20230203_46_G2	A01	Tue Feb 14 17:18:38 EST 2023	254160	nerna_ss_screen_review	UAS_Chrimson_Venus_X_0070	Rubin	attP40; attP2	Sample#3165496252167094431	f	Rubin	Aljoscha Nern	GMR_SS00781	GMR_SS00781-20230203_46_G2	Drosophila melanogaster	20x	w; 20G07-p65ADZp in attP40; 18H11-ZpGdbd in attP2
SS00781	20230203_47_E2	A01	Thu Feb 23 11:33:08 EST 2023	254160	nerna_ss_screen_review	UAS_Chrimson_Venus_X_0070	Rubin	attP40; attP2	Sample#3168670792816787615	m	Rubin	Aljoscha Nern	GMR_SS00781	GMR_SS00781-20230203_47_E2	Drosophila melanogaster	20x	w; 20G07-p65ADZp in attP40; 18H11-ZpGdbd in attP2
SS00782	20230203_46_G3	A01	Tue Feb 14 17:18:38 EST 2023	254161	nerna_ss_screen_review	UAS_Chrimson_Venus_X_0070	Rubin	attP40; attP2	Sample#3165496252271952031	f	Rubin	Aljoscha Nern	GMR_SS00782	GMR_SS00782-20230203_46_G3	Drosophila melanogaster	20x	w; 21A05-p65ADZp in attP40; 31H09-ZpGdbd in attP2
SS00782	20230203_47_E3	A01	Thu Feb 23 11:33:08 EST 2023	254161	nerna_ss_screen_review	UAS_Chrimson_Venus_X_0070	Rubin	attP40; attP2	Sample#3168670792921645215	m	Rubin	Aljoscha Nern	GMR_SS00782	GMR_SS00782-20230203_47_E3	Drosophila melanogaster	20x	w; 21A05-p65ADZp in attP40; 31H09-ZpGdbd in attP2
SS00783	20230203_46_G4	A01	Tue Feb 14 17:18:38 EST 2023	254162	nerna_ss_screen_review	UAS_Chrimson_Venus_X_0070	Rubin	attP40; attP2	Sample#3165496252372615327	f	Rubin	Aljoscha Nern	GMR_SS00783	GMR_SS00783-20230203_46_G4	Drosophila melanogaster	20x	w; 25B02-p65ADZp in attP40; 48D11-ZpGdbd in attP2
SS00783	20230203_47_E4	A01	Thu Feb 23 11:33:08 EST 2023	254162	nerna_ss_screen_review	UAS_Chrimson_Venus_X_0070	Rubin	attP40; attP2	Sample#3168670793022308511	m	Rubin	Aljoscha Nern	GMR_SS00783	GMR_SS00783-20230203_47_E4	Drosophila melanogaster	20x	w; 25B02-p65ADZp in attP40; 48D11-ZpGdbd in attP2
SS00789	20200821_41_A1	A01	Thu Sep 03 11:09:36 EDT 2020	213145	nerna_ss_screen_review	UAS_Chrimson_Venus_X_0070	Rubin	su(Hw)attP2, attP2	Sample#2841413529276252258	f			GMR_SS00789	GMR_SS00789-20200821_41_A1	Drosophila melanogaster	20x	w;; 31C06-p65ADZp in su(Hw)attP2, 34G07-ZpGdbd in attP2
SS00789	20200821_41_C1	A01	Thu Sep 03 11:09:37 EDT 2020	213145	nerna_ss_screen_review	UAS_Chrimson_Venus_X_0070	Rubin	su(Hw)attP2, attP2	Sample#2841413534506549346	m			GMR_SS00789	GMR_SS00789-20200821_41_C1	Drosophila melanogaster	20x	w;; 31C06-p65ADZp in su(Hw)attP2, 34G07-ZpGdbd in attP2
SS00790	20200821_41_A2	A01	Thu Sep 03 11:09:36 EDT 2020	213146	nerna_ss_screen_review	UAS_Chrimson_Venus_X_0070	Rubin	attP40; attP2	Sample#2841413529754402914	f			GMR_SS00790	GMR_SS00790-20200821_41_A2	Drosophila melanogaster	20x	w; 31F10-p65ADZp in attP40; 30F10-ZpGdbd in attP2
SS00790	20200821_41_C2	A01	Thu Sep 03 11:09:37 EDT 2020	213146	nerna_ss_screen_review	UAS_Chrimson_Venus_X_0070	Rubin	attP40; attP2	Sample#2841413534963728482	m			GMR_SS00790	GMR_SS00790-20200821_41_C2	Drosophila melanogaster	20x	w; 31F10-p65ADZp in attP40; 30F10-ZpGdbd in attP2
SS00792	20230203_46_G5	A01	Tue Feb 14 17:18:38 EST 2023	254163	nerna_ss_screen_review	UAS_Chrimson_Venus_X_0070	Rubin	attP40; attP2	Sample#3165496252477472927	f	Rubin	Aljoscha Nern	GMR_SS00792	GMR_SS00792-20230203_46_G5	Drosophila melanogaster	20x	w; 35A03-p65ADZp in attP40; 29G11-ZpGdbd in attP2
SS00792	20230203_47_E5	A01	Thu Feb 23 11:33:08 EST 2023	254163	nerna_ss_screen_review	UAS_Chrimson_Venus_X_0070	Rubin	attP40; attP2	Sample#3168670793127166111	m	Rubin	Aljoscha Nern	GMR_SS00792	GMR_SS00792-20230203_47_E5	Drosophila melanogaster	20x	w; 35A03-p65ADZp in attP40; 29G11-ZpGdbd in attP2
SS00796	20200724_43_A1	A01	Wed Aug 26 11:09:36 EDT 2020	212708	nerna_ss_screen_review	UAS_Chrimson_Venus_X_0070	Rubin	attP40; attP2	Sample#2838514428205334626	f			GMR_SS00796	GMR_SS00796-20200724_43_A1	Drosophila melanogaster	20x	w; 41G07-p65ADZp in attP40; 74G01-ZpGdbd in attP2
SS00796	20200724_43_D2	A01	Wed Aug 26 11:09:38 EDT 2020	212708	nerna_ss_screen_review	UAS_Chrimson_Venus_X_0070	Rubin	attP40; attP2	Sample#2838514435654418530	m			GMR_SS00796	GMR_SS00796-20200724_43_D2	Drosophila melanogaster	20x	w; 41G07-p65ADZp in attP40; 74G01-ZpGdbd in attP2
SS00797	20200821_41_A3	A01	Thu Sep 03 11:09:36 EDT 2020	213147	nerna_ss_screen_review	UAS_Chrimson_Venus_X_0070	Rubin	attP40; attP2	Sample#2841413530203193442	f			GMR_SS00797	GMR_SS00797-20200821_41_A3	Drosophila melanogaster	20x	w; 48A08-p65ADZp in attP40/CyO; 29G11-ZpGdbd in attP2
SS00797	20200821_41_C3	A01	Thu Sep 03 11:09:37 EDT 2020	213147	nerna_ss_screen_review	UAS_Chrimson_Venus_X_0070	Rubin	attP40; attP2	Sample#2841413535441879138	m			GMR_SS00797	GMR_SS00797-20200821_41_C3	Drosophila melanogaster	20x	w; 48A08-p65ADZp in attP40/CyO; 29G11-ZpGdbd in attP2
SS00800	20200821_41_A4	A01	Thu Sep 03 11:09:36 EDT 2020	213148	nerna_ss_screen_review	UAS_Chrimson_Venus_X_0070	Rubin	attP40; attP2	Sample#2841413530660372578	f			GMR_SS00800	GMR_SS00800-20200821_41_A4	Drosophila melanogaster	20x	w; 52H01-p65ADZp in attP40; 17C11-ZpGdbd in attP2
SS00800	20200821_41_C4	A01	Thu Sep 03 11:09:37 EDT 2020	213148	nerna_ss_screen_review	UAS_Chrimson_Venus_X_0070	Rubin	attP40; attP2	Sample#2841413535920029794	m			GMR_SS00800	GMR_SS00800-20200821_41_C4	Drosophila melanogaster	20x	w; 52H01-p65ADZp in attP40; 17C11-ZpGdbd in attP2
SS00801	20200821_41_A5	A01	Thu Sep 03 11:09:36 EDT 2020	213149	nerna_ss_screen_review	UAS_Chrimson_Venus_X_0070	Rubin	attP40; attP2	Sample#2841413531092385890	f			GMR_SS00801	GMR_SS00801-20200821_41_A5	Drosophila melanogaster	20x	w; 53G02-p65ADZp in attP40; 29G11-ZpGdbd in attP2
SS00801	20200821_41_C5	A01	Thu Sep 03 11:09:37 EDT 2020	213149	nerna_ss_screen_review	UAS_Chrimson_Venus_X_0070	Rubin	attP40; attP2	Sample#2841413536343654498	m			GMR_SS00801	GMR_SS00801-20200821_41_C5	Drosophila melanogaster	20x	w; 53G02-p65ADZp in attP40; 29G11-ZpGdbd in attP2
SS00806	20200821_41_A6	A01	Thu Sep 03 11:09:36 EDT 2020	213150	nerna_ss_screen_review	UAS_Chrimson_Venus_X_0070	Rubin	attP40; attP2	Sample#2841413531524399202	f			GMR_SS00806	GMR_SS00806-20200821_41_A6	Drosophila melanogaster	20x	w; 75H09-p65ADZp in attP40; 29G11-ZpGdbd in attP2
SS00806	20200821_41_C6	A01	Thu Sep 03 11:09:38 EDT 2020	213150	nerna_ss_screen_review	UAS_Chrimson_Venus_X_0070	Rubin	attP40; attP2	Sample#2841413536897302626	m			GMR_SS00806	GMR_SS00806-20200821_41_C6	Drosophila melanogaster	20x	w; 75H09-p65ADZp in attP40; 29G11-ZpGdbd in attP2
SS00807	20230203_46_G6	A01	Tue Feb 14 17:18:38 EST 2023	254164	nerna_ss_screen_review	UAS_Chrimson_Venus_X_0070	Rubin	attP40; attP2	Sample#3165496252582330527	f	Rubin	Aljoscha Nern	GMR_SS00807	GMR_SS00807-20230203_46_G6	Drosophila melanogaster	20x	w; 92A10-p65ADZp in attP40; 66A02-ZpGdbd in attP2
SS00807	20230203_47_E6	A01	Thu Feb 23 11:33:08 EST 2023	254164	nerna_ss_screen_review	UAS_Chrimson_Venus_X_0070	Rubin	attP40; attP2	Sample#3168670793232023711	m	Rubin	Aljoscha Nern	GMR_SS00807	GMR_SS00807-20230203_47_E6	Drosophila melanogaster	20x	w; 92A10-p65ADZp in attP40; 66A02-ZpGdbd in attP2
SS00808	20230203_46_H2	A01	Tue Feb 14 17:18:38 EST 2023	254165	nerna_ss_screen_review	UAS_Chrimson_Venus_X_0070	Rubin	attP40; attP2	Sample#3165496252792045727	f	Rubin	Aljoscha Nern	GMR_SS00808	GMR_SS00808-20230203_46_H2	Drosophila melanogaster	20x	w[1118]; P{y[+t7.7] w[+mC]=R92A10-p65.AD}attP40; P{y[+t7.7] w[+mC]=R17D06-GAL4.DBD}attP2
SS00808	20230203_47_G2	A01	Thu Feb 23 11:33:08 EST 2023	254165	nerna_ss_screen_review	UAS_Chrimson_Venus_X_0070	Rubin	attP40; attP2	Sample#3168670794058301599	m	Rubin	Aljoscha Nern	GMR_SS00808	GMR_SS00808-20230203_47_G2	Drosophila melanogaster	20x	w[1118]; P{y[+t7.7] w[+mC]=R92A10-p65.AD}attP40; P{y[+t7.7] w[+mC]=R17D06-GAL4.DBD}attP2
SS00809	20201113_44_A6	A01	Mon Nov 23 17:04:39 EST 2020	217098	nerna_ss_screen_review	UAS_Chrimson_Venus_X_0070	Rubin	attP40; attP2	Sample#2870871397637292130	f			GMR_SS00809	GMR_SS00809-20201113_44_A6	Drosophila melanogaster	20x	w; 19F01-p65ADZp in attP40; 71D01-ZpGdbd in attP2
SS00809	20201113_44_D6	A01	Mon Nov 23 17:04:40 EST 2020	217098	nerna_ss_screen_review	UAS_Chrimson_Venus_X_0070	Rubin	attP40; attP2	Sample#2870871401005318242	m			GMR_SS00809	GMR_SS00809-20201113_44_D6	Drosophila melanogaster	20x	w; 19F01-p65ADZp in attP40; 71D01-ZpGdbd in attP2
SS00810	20191218_45_H2	A01	Wed Jan 22 17:59:37 EST 2020	205423	nerna_ss_screen_review	UAS_Chrimson_Venus_X_0070	Rubin	attP40; attP2	Sample#2759994542395490402	f			GMR_SS00810	GMR_SS00810-20191218_45_H2	Drosophila melanogaster	20x	w; 28D05-p65ADZp in attP40; 55H05-ZpGdbd in attP2
SS00810	20191218_46_H2	A01	Wed Jan 22 18:32:07 EST 2020	205423	nerna_ss_screen_review	UAS_Chrimson_Venus_X_0070	Rubin	attP40; attP2	Sample#2760002723989422178	m			GMR_SS00810	GMR_SS00810-20191218_46_H2	Drosophila melanogaster	20x	w; 28D05-p65ADZp in attP40; 55H05-ZpGdbd in attP2
SS00811	20200724_43_B4	A01	Wed Aug 26 11:09:37 EDT 2020	212717	nerna_ss_screen_review	UAS_Chrimson_Venus_X_0070	Rubin	attP40; attP2	Sample#2838514431711772770	f			GMR_SS00811	GMR_SS00811-20200724_43_B4	Drosophila melanogaster	20x	w; 28D05-p65ADZp in attP40; 82F12-ZpGdbd in attP2
SS00811	20200724_43_E5	A01	Wed Aug 26 11:09:39 EDT 2020	212717	nerna_ss_screen_review	UAS_Chrimson_Venus_X_0070	Rubin	attP40; attP2	Sample#2838514439236354146	m			GMR_SS00811	GMR_SS00811-20200724_43_E5	Drosophila melanogaster	20x	w; 28D05-p65ADZp in attP40; 82F12-ZpGdbd in attP2
SS00813	20230203_46_H3	A01	Tue Feb 14 17:18:38 EST 2023	254166	nerna_ss_screen_review	UAS_Chrimson_Venus_X_0070	Rubin	attP40; attP2	Sample#3165496252917874847	f	Rubin	Aljoscha Nern	GMR_SS00813	GMR_SS00813-20230203_46_H3	Drosophila melanogaster	20x	w; 41C05-p65ADZp in attP40; 26A02-ZpGdbd in attP2
SS00813	20230203_47_G3	A01	Thu Feb 23 11:33:08 EST 2023	254166	nerna_ss_screen_review	UAS_Chrimson_Venus_X_0070	Rubin	attP40; attP2	Sample#3168670794163159199	m	Rubin	Aljoscha Nern	GMR_SS00813	GMR_SS00813-20230203_47_G3	Drosophila melanogaster	20x	w; 41C05-p65ADZp in attP40; 26A02-ZpGdbd in attP2
SS00814	20230203_46_H4	A01	Tue Feb 14 17:18:38 EST 2023	254167	nerna_ss_screen_review	UAS_Chrimson_Venus_X_0070	Rubin	attP40; attP2	Sample#3165496253026926751	f	Rubin	Aljoscha Nern	GMR_SS00814	GMR_SS00814-20230203_46_H4	Drosophila melanogaster	20x	w; 48F07-p65ADZp in attP40; 45F12-ZpGdbd in attP2
SS00814	20230203_47_G4	A01	Thu Feb 23 11:33:08 EST 2023	254167	nerna_ss_screen_review	UAS_Chrimson_Venus_X_0070	Rubin	attP40; attP2	Sample#3168670794263822495	m	Rubin	Aljoscha Nern	GMR_SS00814	GMR_SS00814-20230203_47_G4	Drosophila melanogaster	20x	w; 48F07-p65ADZp in attP40; 45F12-ZpGdbd in attP2
SS00817	20230203_46_H5	A01	Tue Feb 14 17:18:38 EST 2023	254168	nerna_ss_screen_review	UAS_Chrimson_Venus_X_0070	Rubin	attP40; attP2	Sample#3165496253131784351	f	Rubin	Aljoscha Nern	GMR_SS00817	GMR_SS00817-20230203_46_H5	Drosophila melanogaster	20x	w; 60H04-p65ADZp in attP40; 81G11-ZpGdbd in attP2
SS00817	20230203_47_G5	A01	Thu Feb 23 11:33:08 EST 2023	254168	nerna_ss_screen_review	UAS_Chrimson_Venus_X_0070	Rubin	attP40; attP2	Sample#3168670794368680095	m	Rubin	Aljoscha Nern	GMR_SS00817	GMR_SS00817-20230203_47_G5	Drosophila melanogaster	20x	w; 60H04-p65ADZp in attP40; 81G11-ZpGdbd in attP2
SS00818	20220527_44_A1	A01	Thu Jun 09 09:34:08 EDT 2022	246766	nerna_ss_screen_review	UAS_Chrimson_Venus_X_0070	Rubin	attP40; attP2	Sample#3074767291838103650	f	Rubin	Aljoscha Nern	GMR_SS00818	GMR_SS00818-20220527_44_A1	Drosophila melanogaster	20x	w; 72G07-p65ADZp in attP40; 24E12-ZpGdbd in attP2
SS00818	20220527_44_D1	A01	Thu Jun 09 09:34:09 EDT 2022	246766	nerna_ss_screen_review	UAS_Chrimson_Venus_X_0070	Rubin	attP40; attP2	Sample#3074767293956227170	m	Rubin	Aljoscha Nern	GMR_SS00818	GMR_SS00818-20220527_44_D1	Drosophila melanogaster	20x	w; 72G07-p65ADZp in attP40; 24E12-ZpGdbd in attP2
SS00820	20230203_46_H6	A01	Tue Feb 14 17:18:38 EST 2023	254169	nerna_ss_screen_review	UAS_Chrimson_Venus_X_0070	Rubin	attP40; attP2	Sample#3165496253236641951	f	Rubin	Aljoscha Nern	GMR_SS00820	GMR_SS00820-20230203_46_H6	Drosophila melanogaster	20x	w; 37H09-p65ADZp in attP40; 21D04-ZpGdbd in attP2/TM6B
SS00820	20230203_47_G6	A01	Thu Feb 23 11:33:08 EST 2023	254169	nerna_ss_screen_review	UAS_Chrimson_Venus_X_0070	Rubin	attP40; attP2	Sample#3168670794473537695	m	Rubin	Aljoscha Nern	GMR_SS00820	GMR_SS00820-20230203_47_G6	Drosophila melanogaster	20x	w; 37H09-p65ADZp in attP40; 21D04-ZpGdbd in attP2/TM6B
SS00821	20230210_46_A1	A01	Thu Feb 23 15:05:37 EST 2023	254172	nerna_ss_screen_review	UAS_Chrimson_Venus_X_0070	Rubin	attP40; attP2	Sample#3168724269249069215	f	Rubin	Aljoscha Nern	GMR_SS00821	GMR_SS00821-20230210_46_A1	Drosophila melanogaster	20x	w; 59G11-p65ADZp in attP40; 72E04-ZpGdbd in attP2
SS00821	20230210_46_C1	A01	Thu Feb 23 15:05:38 EST 2023	254172	nerna_ss_screen_review	UAS_Chrimson_Venus_X_0070	Rubin	attP40; attP2	Sample#3168724270498971807	m	Rubin	Aljoscha Nern	GMR_SS00821	GMR_SS00821-20230210_46_C1	Drosophila melanogaster	20x	w; 59G11-p65ADZp in attP40; 72E04-ZpGdbd in attP2
SS00823	20230210_46_A2	A01	Thu Feb 23 15:05:37 EST 2023	254173	nerna_ss_screen_review	UAS_Chrimson_Venus_X_0070	Rubin	attP40; attP2	Sample#3168724269374898335	f	Rubin	Aljoscha Nern	GMR_SS00823	GMR_SS00823-20230210_46_A2	Drosophila melanogaster	20x	w; 26F03-p65ADZp in attP40; VT026477-ZpGdbd in attP2
SS00823	20230210_46_C2	A01	Thu Feb 23 15:05:38 EST 2023	254173	nerna_ss_screen_review	UAS_Chrimson_Venus_X_0070	Rubin	attP40; attP2	Sample#3168724270599635103	m	Rubin	Aljoscha Nern	GMR_SS00823	GMR_SS00823-20230210_46_C2	Drosophila melanogaster	20x	w; 26F03-p65ADZp in attP40; VT026477-ZpGdbd in attP2
SS00824	20210521_44_B3	A01	Fri Jun 04 11:34:35 EDT 2021	227739	nerna_ss_screen_review	UAS_Chrimson_Venus_X_0070	Rubin	attP40; attP2	Sample#2940714094493171810	f	Rubin	Aljoscha Nern	GMR_SS00824	GMR_SS00824-20210521_44_B3	Drosophila melanogaster	20x	w; 32A04-p65ADZp in attP40; VT065322-ZpGdbd in attP2/TM6B
SS00824	20210521_44_G3	A01	Fri Jun 04 11:34:36 EDT 2021	227739	nerna_ss_screen_review	UAS_Chrimson_Venus_X_0070	Rubin	attP40; attP2	Sample#2940714095508193378	m	Rubin	Aljoscha Nern	GMR_SS00824	GMR_SS00824-20210521_44_G3	Drosophila melanogaster	20x	w; 32A04-p65ADZp in attP40; VT065322-ZpGdbd in attP2/TM6B
SS00825	20210521_44_A6	A01	Fri Jun 04 11:19:05 EDT 2021	227736	nerna_ss_screen_review	UAS_Chrimson_Venus_X_0070	Rubin	attP40; attP2	Sample#2940710192439885922	f	Rubin	Aljoscha Nern	GMR_SS00825	GMR_SS00825-20210521_44_A6	Drosophila melanogaster	20x	w; 32A04-p65ADZp in attP40; VT043137-ZpGdbd in attP2
SS00825	20210521_44_F6	A01	Fri Jun 04 11:19:05 EDT 2021	227736	nerna_ss_screen_review	UAS_Chrimson_Venus_X_0070	Rubin	attP40; attP2	Sample#2940710192607658082	m	Rubin	Aljoscha Nern	GMR_SS00825	GMR_SS00825-20210521_44_F6	Drosophila melanogaster	20x	w; 32A04-p65ADZp in attP40; VT043137-ZpGdbd in attP2
SS00835	20221111_44_G4	A01	Tue Dec 06 14:03:08 EST 2022	251729	nerna_ss_screen_review	UAS_Chrimson_Venus_X_0070	Rubin	attP40; attP2	Sample#3140079900875030626	f	Rubin	Aljoscha Nern	GMR_SS00835	GMR_SS00835-20221111_44_G4	Drosophila melanogaster	20x	w; 54B01-p65ADZp in attP40/CyOTb; VT044966-ZpGDBD in attP2
SS00835	20221111_45_F4	A01	Wed Nov 30 16:01:38 EST 2022	251729	nerna_ss_screen_review	UAS_Chrimson_Venus_X_0070	Rubin	attP40; attP2	Sample#3137935395828793442	m	Rubin	Aljoscha Nern	GMR_SS00835	GMR_SS00835-20221111_45_F4	Drosophila melanogaster	20x	w; 54B01-p65ADZp in attP40/CyOTb; VT044966-ZpGDBD in attP2
SS00836	20220527_44_B1	A01	Thu Jun 09 09:34:08 EDT 2022	246772	nerna_ss_screen_review	UAS_Chrimson_Venus_X_0070	Rubin	attP40; attP2	Sample#3074767292559523938	f	Rubin	Aljoscha Nern	GMR_SS00836	GMR_SS00836-20220527_44_B1	Drosophila melanogaster	20x	w; 55B09-p65ADZp in attP40; VT049344-ZpGdbd in attP2
SS00836	20220527_44_E1	A01	Thu Jun 09 09:34:09 EDT 2022	246772	nerna_ss_screen_review	UAS_Chrimson_Venus_X_0070	Rubin	attP40; attP2	Sample#3074767294631510114	m	Rubin	Aljoscha Nern	GMR_SS00836	GMR_SS00836-20220527_44_E1	Drosophila melanogaster	20x	w; 55B09-p65ADZp in attP40; VT049344-ZpGdbd in attP2
SS00837	20230210_46_A3	A01	Thu Feb 23 15:05:37 EST 2023	254174	nerna_ss_screen_review	UAS_Chrimson_Venus_X_0070	Rubin	attP40; attP2	Sample#3168724269475561631	f	Rubin	Aljoscha Nern	GMR_SS00837	GMR_SS00837-20230210_46_A3	Drosophila melanogaster	20x	w; 55B09-p65ADZp in attP40; 20F03-ZpGdbd in attP2
SS00837	20230210_46_C3	A01	Thu Feb 23 15:05:38 EST 2023	254174	nerna_ss_screen_review	UAS_Chrimson_Venus_X_0070	Rubin	attP40; attP2	Sample#3168724270700298399	m	Rubin	Aljoscha Nern	GMR_SS00837	GMR_SS00837-20230210_46_C3	Drosophila melanogaster	20x	w; 55B09-p65ADZp in attP40; 20F03-ZpGdbd in attP2
SS00839	20230210_46_A4	A01	Thu Feb 23 15:05:37 EST 2023	254175	nerna_ss_screen_review	UAS_Chrimson_Venus_X_0070	Rubin	attP40; attP2	Sample#3168724269576224927	f	Rubin	Aljoscha Nern	GMR_SS00839	GMR_SS00839-20230210_46_A4	Drosophila melanogaster	20x	w; 61H09-p65ADZp in attP40/CyOTb; VT045101-ZpGdbd in attP2
SS00839	20230210_46_C4	A01	Thu Feb 23 15:05:38 EST 2023	254175	nerna_ss_screen_review	UAS_Chrimson_Venus_X_0070	Rubin	attP40; attP2	Sample#3168724270800961695	m	Rubin	Aljoscha Nern	GMR_SS00839	GMR_SS00839-20230210_46_C4	Drosophila melanogaster	20x	w; 61H09-p65ADZp in attP40/CyOTb; VT045101-ZpGdbd in attP2
SS00844	20220422_45_G5	A01	Thu May 05 12:45:08 EDT 2022	245700	nerna_ss_screen_review	UAS_Chrimson_Venus_X_0070	Rubin	attP40; attP2	Sample#3062131782867484770	f	Rubin	Aljoscha Nern	GMR_SS00844	GMR_SS00844-20220422_45_G5	Drosophila melanogaster	20x	w; 25A08-p65ADZp in attP40; 17D06-ZpGdbd in attP2
SS00844	20220422_46_G5	A01	Thu May 05 15:43:37 EDT 2022	245700	nerna_ss_screen_review	UAS_Chrimson_Venus_X_0070	Rubin	attP40; attP2	Sample#3062176698532364386	m	Rubin	Aljoscha Nern	GMR_SS00844	GMR_SS00844-20220422_46_G5	Drosophila melanogaster	20x	w; 25A08-p65ADZp in attP40; 17D06-ZpGdbd in attP2
SS00847	20230210_46_A5	A01	Thu Feb 23 15:05:37 EST 2023	254176	nerna_ss_screen_review	UAS_Chrimson_Venus_X_0070	Rubin	attP40; attP2	Sample#3168724269676888223	f	Rubin	Aljoscha Nern	GMR_SS00847	GMR_SS00847-20230210_46_A5	Drosophila melanogaster	20x	w; 13B10-p65ADZp in attP40; 46H03-ZpGdbd in attP2
SS00847	20230210_46_C5	A01	Thu Feb 23 15:05:38 EST 2023	254176	nerna_ss_screen_review	UAS_Chrimson_Venus_X_0070	Rubin	attP40; attP2	Sample#3168724270901624991	m	Rubin	Aljoscha Nern	GMR_SS00847	GMR_SS00847-20230210_46_C5	Drosophila melanogaster	20x	w; 13B10-p65ADZp in attP40; 46H03-ZpGdbd in attP2
SS00865	20200110_46_A6	A01	Fri Jan 24 18:04:41 EST 2020	206174	ditp_ss_screen_review	UAS_Chrimson_Venus_X_0070	Card	attP40; attP2	Sample#2760720595044794466	f			BJD_SS00865	BJD_SS00865-20200110_46_A6	Drosophila melanogaster	20x	w; VT019060-p65ADZp in attP40/CyO::Tb-RFP; VT003280-ZpGdbd in attP2
SS00865	20200110_46_F6	A01	Fri Jan 24 18:04:42 EST 2020	206174	ditp_ss_screen_review	UAS_Chrimson_Venus_X_0070	Card	attP40; attP2	Sample#2760720600539332706	m			BJD_SS00865	BJD_SS00865-20200110_46_F6	Drosophila melanogaster	20x	w; VT019060-p65ADZp in attP40/CyO::Tb-RFP; VT003280-ZpGdbd in attP2
SS00898	20200110_46_B4	A01	Fri Jan 24 18:04:41 EST 2020	206178	ditp_ss_screen_review	UAS_Chrimson_Venus_X_0070	Card	attP40; attP2	Sample#2760720595921404002	f			BJD_SS00898	BJD_SS00898-20200110_46_B4	Drosophila melanogaster	20x	w; VT020033-p65ADZp in attP40; VT014208-ZpGdbd in attP2
SS00898	20200110_46_G4	A01	Fri Jan 24 18:04:43 EST 2020	206178	ditp_ss_screen_review	UAS_Chrimson_Venus_X_0070	Card	attP40; attP2	Sample#2760720601399165026	m			BJD_SS00898	BJD_SS00898-20200110_46_G4	Drosophila melanogaster	20x	w; VT020033-p65ADZp in attP40; VT014208-ZpGdbd in attP2
SS00923	20200110_46_E1	A01	Fri Jan 24 18:04:42 EST 2020	206193	ditp_ss_screen_review	UAS_Chrimson_Venus_X_0070	Card	attP40; attP2	Sample#2760720599247487074	f			BJD_SS00923	BJD_SS00923-20200110_46_E1	Drosophila melanogaster	20x	w; VT057470-p65ADZp in attP40/CyO::Tb-RFP; VT033947-ZpGdbd in attP2
SS00923	20200110_46_J1	A01	Fri Jan 24 18:04:43 EST 2020	206193	ditp_ss_screen_review	UAS_Chrimson_Venus_X_0070	Card	attP40; attP2	Sample#2760720604758802530	m			BJD_SS00923	BJD_SS00923-20200110_46_J1	Drosophila melanogaster	20x	w; VT057470-p65ADZp in attP40/CyO::Tb-RFP; VT033947-ZpGdbd in attP2
SS00934	20200110_46_C1	A01	Fri Jan 24 18:04:41 EST 2020	206181	ditp_ss_screen_review	UAS_Chrimson_Venus_X_0070	Card	attP40; attP2	Sample#2760720596617658466	f			BJD_SS00934	BJD_SS00934-20200110_46_C1	Drosophila melanogaster	20x	w; VT032898-p65ADZp in attP40/CyO::Tb-RFP; VT048835-ZpGdbd in attP2
SS00934	20200110_46_H1	A01	Fri Jan 24 18:04:43 EST 2020	206181	ditp_ss_screen_review	UAS_Chrimson_Venus_X_0070	Card	attP40; attP2	Sample#2760720602070253666	m			BJD_SS00934	BJD_SS00934-20200110_46_H1	Drosophila melanogaster	20x	w; VT032898-p65ADZp in attP40/CyO::Tb-RFP; VT048835-ZpGdbd in attP2
SS00937	20200117_45_B1	A01	Wed Feb 05 14:57:43 EST 2020	206330	nerna_ss_screen_review	UAS_Chrimson_Venus_X_0070	Rubin	attP40; attP2	Sample#2765022199361306722	f			GMR_SS00937	GMR_SS00937-20200117_45_B1	Drosophila melanogaster	20x	w; 22A07-p65ADZp in attP40/CyO::Tb-RFP; 35D04-ZpGdbd in attP2/TM6B
SS00937	20200117_45_D1	A01	Wed Feb 05 14:57:44 EST 2020	206330	nerna_ss_screen_review	UAS_Chrimson_Venus_X_0070	Rubin	attP40; attP2	Sample#2765022200711872610	m			GMR_SS00937	GMR_SS00937-20200117_45_D1	Drosophila melanogaster	20x	w; 22A07-p65ADZp in attP40/CyO::Tb-RFP; 35D04-ZpGdbd in attP2/TM6B
SS00938	20200117_45_E2	A01	Wed Feb 05 14:57:44 EST 2020	206334	nerna_ss_screen_review	UAS_Chrimson_Venus_X_0070	Rubin	attP40; attP2	Sample#2765022201378766946	m			GMR_SS00938	GMR_SS00938-20200117_45_E2	Drosophila melanogaster	20x	w; 35D04-p65ADZp in attP40; 71E06-ZpGdbd in attP2/TM6B
SS00938	20200117_45_E5	A01	Wed Feb 05 14:57:44 EST 2020	206334	nerna_ss_screen_review	UAS_Chrimson_Venus_X_0070	Rubin	attP40; attP2	Sample#2765022201827557474	f			GMR_SS00938	GMR_SS00938-20200117_45_E5	Drosophila melanogaster	20x	w; 35D04-p65ADZp in attP40; 71E06-ZpGdbd in attP2/TM6B
SS00940	20200117_45_A2	A01	Wed Feb 05 14:57:43 EST 2020	206336	nerna_ss_screen_review	UAS_Chrimson_Venus_X_0070	Rubin	attP40; attP2	Sample#2765022198690218082	f			GMR_SS00940	GMR_SS00940-20200117_45_A2	Drosophila melanogaster	20x	w; 35D04-p65ADZp in attP40; 22A07-ZpGdbd in attP2
SS00940	20200117_45_C2	A01	Wed Feb 05 14:57:44 EST 2020	206336	nerna_ss_screen_review	UAS_Chrimson_Venus_X_0070	Rubin	attP40; attP2	Sample#2765022200040783970	m			GMR_SS00940	GMR_SS00940-20200117_45_C2	Drosophila melanogaster	20x	w; 35D04-p65ADZp in attP40; 22A07-ZpGdbd in attP2
SS00941	20200117_45_A1	A01	Wed Feb 05 14:57:43 EST 2020	206335	nerna_ss_screen_review	UAS_Chrimson_Venus_X_0070	Rubin	VK00027, attP2	Sample#2765022198526640226	f			GMR_SS00941	GMR_SS00941-20200117_45_A1	Drosophila melanogaster	20x	w;; 47E07-p65ADZp in VK00027, 35D04-ZpGdbd in attP2
SS00941	20200117_45_C1	A01	Wed Feb 05 14:57:44 EST 2020	206335	nerna_ss_screen_review	UAS_Chrimson_Venus_X_0070	Rubin	VK00027, attP2	Sample#2765022199906566242	m			GMR_SS00941	GMR_SS00941-20200117_45_C1	Drosophila melanogaster	20x	w;; 47E07-p65ADZp in VK00027, 35D04-ZpGdbd in attP2
SS00942	20200117_45_E1	A01	Wed Feb 05 14:57:44 EST 2020	206333	nerna_ss_screen_review	UAS_Chrimson_Venus_X_0070	Rubin	attP40; attP2	Sample#2765022201244549218	m			GMR_SS00942	GMR_SS00942-20200117_45_E1	Drosophila melanogaster	20x	w; 47E07-p65ADZp in attP40; 35D04-ZpGdbd in attP2
SS00942	20200117_45_E4	A01	Wed Feb 05 14:57:44 EST 2020	206333	nerna_ss_screen_review	UAS_Chrimson_Venus_X_0070	Rubin	attP40; attP2	Sample#2765022201643008098	f			GMR_SS00942	GMR_SS00942-20200117_45_E4	Drosophila melanogaster	20x	w; 47E07-p65ADZp in attP40; 35D04-ZpGdbd in attP2
SS00955	20210312_42_A1	A01	Fri Apr 09 17:41:43 EDT 2021	222085	nerna_ss_screen_review	UAS_Chrimson_Venus_X_0070	Rubin	attP40; attP2	Sample#2920512766060003426	f	Rubin	Aljoscha Nern	GMR_SS00955	GMR_SS00955-20210312_42_A1	Drosophila melanogaster	20x	w; 55C05-p65ADZp in attP40; 71D01-ZpGdbd in attP2
SS00955	20210312_42_B4	A01	Fri Apr 09 17:41:44 EDT 2021	222085	nerna_ss_screen_review	UAS_Chrimson_Venus_X_0070	Rubin	attP40; attP2	Sample#2920512767590924386	m	Rubin	Aljoscha Nern	GMR_SS00955	GMR_SS00955-20210312_42_B4	Drosophila melanogaster	20x	w; 55C05-p65ADZp in attP40; 71D01-ZpGdbd in attP2
SS01001	20220527_44_A5	A01	Thu Jun 09 09:34:08 EDT 2022	246770	nerna_ss_screen_review	UAS_Chrimson_Venus_X_0070	Rubin	attP40; attP2	Sample#3074767292333031522	f	Rubin	Aljoscha Nern	GMR_SS01001	GMR_SS01001-20220527_44_A5	Drosophila melanogaster	20x	w; 65E11-p65ADZp in attP40/CyO; 20C09-ZpGdbd in attP2
SS01001	20220527_44_D5	A01	Thu Jun 09 09:34:09 EDT 2022	246770	nerna_ss_screen_review	UAS_Chrimson_Venus_X_0070	Rubin	attP40; attP2	Sample#3074767294405017698	m	Rubin	Aljoscha Nern	GMR_SS01001	GMR_SS01001-20220527_44_D5	Drosophila melanogaster	20x	w; 65E11-p65ADZp in attP40/CyO; 20C09-ZpGdbd in attP2
SS01010	20230210_46_A6	A01	Thu Feb 23 15:05:37 EST 2023	254177	nerna_ss_screen_review	UAS_Chrimson_Venus_X_0070	Rubin	attP40; attP2	Sample#3168724269777551519	f	Rubin	Aljoscha Nern	GMR_SS01010	GMR_SS01010-20230210_46_A6	Drosophila melanogaster	20x	w; 32A11-p65ADZp in attP40; 81E05-ZpGdbd in attP2
SS01010	20230210_46_C6	A01	Thu Feb 23 15:05:38 EST 2023	254177	nerna_ss_screen_review	UAS_Chrimson_Venus_X_0070	Rubin	attP40; attP2	Sample#3168724271010676895	m	Rubin	Aljoscha Nern	GMR_SS01010	GMR_SS01010-20230210_46_C6	Drosophila melanogaster	20x	w; 32A11-p65ADZp in attP40; 81E05-ZpGdbd in attP2
SS01015	20230210_46_B1	A01	Thu Feb 23 15:05:37 EST 2023	254178	nerna_ss_screen_review	UAS_Chrimson_Venus_X_0070	Rubin	attP40; attP2	Sample#3168724269882409119	f	Rubin	Aljoscha Nern	GMR_SS01015	GMR_SS01015-20230210_46_B1	Drosophila melanogaster	20x	w; 21B12-p65ADZp in attP40; 20E07-ZpGdbd in attP2
SS01015	20230210_46_D1	A01	Thu Feb 23 15:05:38 EST 2023	254178	nerna_ss_screen_review	UAS_Chrimson_Venus_X_0070	Rubin	attP40; attP2	Sample#3168724271111340191	m	Rubin	Aljoscha Nern	GMR_SS01015	GMR_SS01015-20230210_46_D1	Drosophila melanogaster	20x	w; 21B12-p65ADZp in attP40; 20E07-ZpGdbd in attP2
SS01019	20200821_42_C4	A01	Thu Sep 03 13:31:39 EDT 2020	213151	nerna_ss_screen_review	UAS_Chrimson_Venus_X_0070	Rubin	attP40; attP2	Sample#2841449277501210722	f			GMR_SS01019	GMR_SS01019-20200821_42_C4	Drosophila melanogaster	20x	w; 48A07-p65ADZp in attP40; 13F11-ZpGdbd in attP2
SS01019	20200821_42_G4	A01	Thu Sep 03 13:31:41 EDT 2020	213151	nerna_ss_screen_review	UAS_Chrimson_Venus_X_0070	Rubin	attP40; attP2	Sample#2841449285529108578	m			GMR_SS01019	GMR_SS01019-20200821_42_G4	Drosophila melanogaster	20x	w; 48A07-p65ADZp in attP40; 13F11-ZpGdbd in attP2
SS01046	20191218_47_A1	A01	Sat Jan 18 11:11:09 EST 2020	205421	ditp_ss_screen_review	UAS_Chrimson_Venus_X_0070	Card	attP40; attP2	Sample#2758442199497572450	m			GMR_SS01046	GMR_SS01046-20191218_47_A1	Drosophila melanogaster	20x	w; VT048835-p65ADZp in attP40; 24C07-ZpGdbd in attP2
SS01046	20191218_48_A1	A01	Thu Jan 23 15:43:08 EST 2020	205421	ditp_ss_screen_review	UAS_Chrimson_Venus_X_0070	Card	attP40; attP2	Sample#2760322584657526882	f			GMR_SS01046	GMR_SS01046-20191218_48_A1	Drosophila melanogaster	20x	w; VT048835-p65ADZp in attP40; 24C07-ZpGdbd in attP2
SS01047	20191218_47_A4	A01	Sat Jan 18 11:11:09 EST 2020	205422	ditp_ss_screen_review	UAS_Chrimson_Venus_X_0070	Card	attP40; attP2	Sample#2758442200114135138	m			GMR_SS01047	GMR_SS01047-20191218_47_A4	Drosophila melanogaster	20x	w; VT019018-p65ADZp in attP40; VT017647-ZpGdbd in attP2/TM6B
SS01047	20191218_48_A4	A01	Thu Jan 23 15:43:08 EST 2020	205422	ditp_ss_screen_review	UAS_Chrimson_Venus_X_0070	Card	attP40; attP2	Sample#2760322585378947170	f			GMR_SS01047	GMR_SS01047-20191218_48_A4	Drosophila melanogaster	20x	w; VT019018-p65ADZp in attP40; VT017647-ZpGdbd in attP2/TM6B
SS01048	20210219_41_B3	A01	Wed Mar 10 13:11:20 EST 2021	219870	ditp_ss_screen_review	UAS_Chrimson_Venus_X_0070	Card	attP40; attP2	Sample#2909588183215767650	f	Descending Interneuron	Shigehiro Namiki	GMR_SS01048	GMR_SS01048-20210219_41_B3	Drosophila melanogaster	20x	w; 40541-p65ADZp in attP40/CyO; VT050661-ZpGdbd in attP2
SS01048	20210219_41_G3	A01	Wed Mar 10 13:11:21 EST 2021	219870	ditp_ss_screen_review	UAS_Chrimson_Venus_X_0070	Card	attP40; attP2	Sample#2909588187053555810	m	Descending Interneuron	Shigehiro Namiki	GMR_SS01048	GMR_SS01048-20210219_41_G3	Drosophila melanogaster	20x	w; 40541-p65ADZp in attP40/CyO; VT050661-ZpGdbd in attP2
SS01049	20191218_47_D1	A01	Sat Jan 18 11:11:10 EST 2020	205431	ditp_ss_screen_review	UAS_Chrimson_Venus_X_0070	Card	attP40; attP2	Sample#2758442203096285282	m			GMR_SS01049	GMR_SS01049-20191218_47_D1	Drosophila melanogaster	20x	w; VT017683-p65ADZp in attP40; VT031084-ZpGdbd in attP2
SS01049	20191218_48_D1	A01	Thu Jan 23 15:43:09 EST 2020	205431	ditp_ss_screen_review	UAS_Chrimson_Venus_X_0070	Card	attP40; attP2	Sample#2760322588839247970	f			GMR_SS01049	GMR_SS01049-20191218_48_D1	Drosophila melanogaster	20x	w; VT017683-p65ADZp in attP40; VT031084-ZpGdbd in attP2
SS01051	20191122_48_D3	A01	Fri Dec 06 15:13:20 EST 2019	204146	ditp_ss_screen_review	UAS_Chrimson_Venus_X_0070	Card	attP40; attP2	Sample#2742920465981898850	m			GMR_SS01051	GMR_SS01051-20191122_48_D3	Drosophila melanogaster	20x	w; VT019391-p65ADZp in attP40; VT028198-ZpGdbd in attP2
SS01051	20191122_48_E2	A01	Thu Dec 12 16:34:07 EST 2019	204146	ditp_ss_screen_review	UAS_Chrimson_Venus_X_0070	Card	attP40; attP2	Sample#2745115125861056610	f			GMR_SS01051	GMR_SS01051-20191122_48_E2	Drosophila melanogaster	20x	w; VT019391-p65ADZp in attP40; VT028198-ZpGdbd in attP2
SS01052	20191218_47_B5	A01	Sat Jan 18 11:11:10 EST 2020	205424	ditp_ss_screen_review	UAS_Chrimson_Venus_X_0070	Card	attP40; attP2	Sample#2758442201586335842	m			GMR_SS01052	GMR_SS01052-20191218_47_B5	Drosophila melanogaster	20x	w; VT056582-p65ADZp in attP40; 22D06-ZpGdbd in attP2
SS01052	20191218_48_B5	A01	Thu Jan 23 15:43:09 EST 2020	205424	ditp_ss_screen_review	UAS_Chrimson_Venus_X_0070	Card	attP40; attP2	Sample#2760322586976976994	f			GMR_SS01052	GMR_SS01052-20191218_48_B5	Drosophila melanogaster	20x	w; VT056582-p65ADZp in attP40; 22D06-ZpGdbd in attP2
SS01053	20191218_47_B6	A01	Sat Jan 18 11:11:10 EST 2020	205425	ditp_ss_screen_review	UAS_Chrimson_Venus_X_0070	Card	attP40; attP2	Sample#2758442201791856738	m			GMR_SS01053	GMR_SS01053-20191218_47_B6	Drosophila melanogaster	20x	w; VT063736-p65ADZp in attP40; 24A03-ZpGdbd in attP2
SS01053	20191218_48_B6	A01	Thu Jan 23 15:43:09 EST 2020	205425	ditp_ss_screen_review	UAS_Chrimson_Venus_X_0070	Card	attP40; attP2	Sample#2760322587207663714	f			GMR_SS01053	GMR_SS01053-20191218_48_B6	Drosophila melanogaster	20x	w; VT063736-p65ADZp in attP40; 24A03-ZpGdbd in attP2
SS01058	20210219_41_B4	A01	Wed Mar 10 13:11:20 EST 2021	219871	ditp_ss_screen_review	UAS_Chrimson_Venus_X_0070	Card	attP40; attP2	Sample#2909588183370956898	f	Descending Interneuron	Shigehiro Namiki	GMR_SS01058	GMR_SS01058-20210219_41_B4	Drosophila melanogaster	20x	w; 21C05-p65ADZp in attP40/CyO::Tb-RFP; 28E01-ZpGdbd in attP2/TM6B
SS01058	20210219_41_G4	A01	Wed Mar 10 13:11:21 EST 2021	219871	ditp_ss_screen_review	UAS_Chrimson_Venus_X_0070	Card	attP40; attP2	Sample#2909588187204550754	m	Descending Interneuron	Shigehiro Namiki	GMR_SS01058	GMR_SS01058-20210219_41_G4	Drosophila melanogaster	20x	w; 21C05-p65ADZp in attP40/CyO::Tb-RFP; 28E01-ZpGdbd in attP2/TM6B
SS01059	20191218_47_D2	A01	Sat Jan 18 11:11:10 EST 2020	205432	ditp_ss_screen_review	UAS_Chrimson_Venus_X_0070	Card	attP40; attP2	Sample#2758442203301806178	m			GMR_SS01059	GMR_SS01059-20191218_47_D2	Drosophila melanogaster	20x	w; 21F01-p65ADZp in attP40; 22D06-ZpGdbd in attP2
SS01059	20191218_48_D2	A01	Thu Jan 23 15:43:09 EST 2020	205432	ditp_ss_screen_review	UAS_Chrimson_Venus_X_0070	Card	attP40; attP2	Sample#2760322589074128994	f			GMR_SS01059	GMR_SS01059-20191218_48_D2	Drosophila melanogaster	20x	w; 21F01-p65ADZp in attP40; 22D06-ZpGdbd in attP2
SS01060	20191218_47_F3	A01	Sat Jan 18 11:10:41 EST 2020	205433	ditp_ss_screen_review	UAS_Chrimson_Venus_X_0070	Card	attP40; attP2	Sample#2758442080924598370	m			GMR_SS01060	GMR_SS01060-20191218_47_F3	Drosophila melanogaster	20x	w; 21F05-p65ADZp in attP40/CyO::Tb-RFP; 21H11-ZpGdbd in attP2/TM6B
SS01060	20191218_48_F3	A01	Thu Jan 23 15:43:10 EST 2020	205433	ditp_ss_screen_review	UAS_Chrimson_Venus_X_0070	Card	attP40; attP2	Sample#2760322592047890530	f			GMR_SS01060	GMR_SS01060-20191218_48_F3	Drosophila melanogaster	20x	w; 21F05-p65ADZp in attP40/CyO::Tb-RFP; 21H11-ZpGdbd in attP2/TM6B
SS01061	20200710_45_B5	A01	Tue Aug 11 19:54:08 EDT 2020	212412	ditp_ss_screen_review	UAS_Chrimson_Venus_X_0070	Card	attP40; attP2	Sample#2833210610680856674	f			GMR_SS01061	GMR_SS01061-20200710_45_B5	Drosophila melanogaster	20x	w; 22H02-p65ADZp in attP40/CyO::Tb-RFP; 20F03-ZpGdbd in attP2
SS01061	20200710_45_E4	A01	Tue Aug 11 19:54:09 EDT 2020	212412	ditp_ss_screen_review	UAS_Chrimson_Venus_X_0070	Card	attP40; attP2	Sample#2833210616787763298	m			GMR_SS01061	GMR_SS01061-20200710_45_E4	Drosophila melanogaster	20x	w; 22H02-p65ADZp in attP40/CyO::Tb-RFP; 20F03-ZpGdbd in attP2
SS01062	20210219_41_B5	A01	Wed Mar 10 13:11:20 EST 2021	219872	ditp_ss_screen_review	UAS_Chrimson_Venus_X_0070	Card	attP40; attP2	Sample#2909588183526146146	f	Descending Interneuron	Shigehiro Namiki	GMR_SS01062	GMR_SS01062-20210219_41_B5	Drosophila melanogaster	20x	w; 24A03-p65ADZp in attP40; 74C01-ZpGdbd in attP2
SS01062	20210219_41_G5	A01	Wed Mar 10 13:11:21 EST 2021	219872	ditp_ss_screen_review	UAS_Chrimson_Venus_X_0070	Card	attP40; attP2	Sample#2909588187359740002	m	Descending Interneuron	Shigehiro Namiki	GMR_SS01062	GMR_SS01062-20210219_41_G5	Drosophila melanogaster	20x	w; 24A03-p65ADZp in attP40; 74C01-ZpGdbd in attP2
SS01064	20191218_47_A3	A01	Sat Jan 18 11:11:09 EST 2020	205419	ditp_ss_screen_review	UAS_Chrimson_Venus_X_0070	Card	attP40; attP2	Sample#2758442199908614242	m			GMR_SS01064	GMR_SS01064-20191218_47_A3	Drosophila melanogaster	20x	w; 27E07-p65ADZp in attP40; 14D01-ZpGdbd in attP2/TM6B
SS01064	20191218_48_A3	A01	Thu Jan 23 15:43:08 EST 2020	205419	ditp_ss_screen_review	UAS_Chrimson_Venus_X_0070	Card	attP40; attP2	Sample#2760322585148260450	f			GMR_SS01064	GMR_SS01064-20191218_48_A3	Drosophila melanogaster	20x	w; 27E07-p65ADZp in attP40; 14D01-ZpGdbd in attP2/TM6B
SS01065	20221104_44_B1	A01	Fri Nov 18 13:39:38 EST 2022	251698	ditp_ss_screen_review	UAS_Chrimson_Venus_X_0070	Card	attP40; attP2	Sample#3133551006349000802	f	Descending Interneuron	Shigehiro Namiki	GMR_SS01065	GMR_SS01065-20221104_44_B1	Drosophila melanogaster	20x	w; 30C01-p65ADZp in attP40/CyO::Tb-RFP; 85H01-ZpGdbd in attP2
SS01065	20221104_44_B2	A01	Fri Nov 18 13:39:38 EST 2022	251698	ditp_ss_screen_review	UAS_Chrimson_Venus_X_0070	Card	attP40; attP2	Sample#3133551006537744482	f	Descending Interneuron	Shigehiro Namiki	GMR_SS01065	GMR_SS01065-20221104_44_B2	Drosophila melanogaster	20x	w; 30C01-p65ADZp in attP40/CyO::Tb-RFP; 85H01-ZpGdbd in attP2
SS01065	20221104_44_B3	A01	Fri Nov 18 13:38:08 EST 2022	251698	ditp_ss_screen_review	UAS_Chrimson_Venus_X_0070	Card	attP40; attP2	Sample#3133550628861640802	m	Descending Interneuron	Shigehiro Namiki	GMR_SS01065	GMR_SS01065-20221104_44_B3	Drosophila melanogaster	20x	w; 30C01-p65ADZp in attP40/CyO::Tb-RFP; 85H01-ZpGdbd in attP2
SS01065	20221104_44_B4	A01	Fri Nov 18 13:38:08 EST 2022	251698	ditp_ss_screen_review	UAS_Chrimson_Venus_X_0070	Card	attP40; attP2	Sample#3133550629054578786	m	Descending Interneuron	Shigehiro Namiki	GMR_SS01065	GMR_SS01065-20221104_44_B4	Drosophila melanogaster	20x	w; 30C01-p65ADZp in attP40/CyO::Tb-RFP; 85H01-ZpGdbd in attP2
SS01067	20210219_41_C1	A01	Wed Mar 10 13:11:20 EST 2021	219874	ditp_ss_screen_review	UAS_Chrimson_Venus_X_0070	Card	attP40; attP2	Sample#2909588183828136034	f	Descending Interneuron	Shigehiro Namiki	GMR_SS01067	GMR_SS01067-20210219_41_C1	Drosophila melanogaster	20x	w; 31B08-p65ADZp in attP40; 88C07-ZpGdbd in attP2
SS01067	20210219_41_H1	A01	Wed Mar 10 13:11:21 EST 2021	219874	ditp_ss_screen_review	UAS_Chrimson_Venus_X_0070	Card	attP40; attP2	Sample#2909588187665924194	m	Descending Interneuron	Shigehiro Namiki	GMR_SS01067	GMR_SS01067-20210219_41_H1	Drosophila melanogaster	20x	w; 31B08-p65ADZp in attP40; 88C07-ZpGdbd in attP2
SS01068	20210219_41_A6	A01	Wed Mar 10 13:11:20 EST 2021	219867	ditp_ss_screen_review	UAS_Chrimson_Venus_X_0070	Card	attP40; attP2	Sample#2909588182750199906	f	Descending Interneuron	Shigehiro Namiki	GMR_SS01068	GMR_SS01068-20210219_41_A6	Drosophila melanogaster	20x	w; 32C05-p65ADZp in attP40; 70C05-ZpGdbd in attP2
SS01068	20210219_41_F6	A01	Wed Mar 10 13:11:21 EST 2021	219867	ditp_ss_screen_review	UAS_Chrimson_Venus_X_0070	Card	attP40; attP2	Sample#2909588186587988066	m	Descending Interneuron	Shigehiro Namiki	GMR_SS01068	GMR_SS01068-20210219_41_F6	Drosophila melanogaster	20x	w; 32C05-p65ADZp in attP40; 70C05-ZpGdbd in attP2
SS01069	20191218_47_C1	A01	Sat Jan 18 11:11:09 EST 2020	205428	ditp_ss_screen_review	UAS_Chrimson_Venus_X_0070	Card	attP40; attP2	Sample#2758442198839066722	m			GMR_SS01069	GMR_SS01069-20191218_47_C1	Drosophila melanogaster	20x	w; 38H06-p65ADZp in attP40; VT018689-ZpGdbd in attP2
SS01069	20191218_48_C1	A01	Thu Jan 23 15:43:09 EST 2020	205428	ditp_ss_screen_review	UAS_Chrimson_Venus_X_0070	Card	attP40; attP2	Sample#2760322587438350434	f			GMR_SS01069	GMR_SS01069-20191218_48_C1	Drosophila melanogaster	20x	w; 38H06-p65ADZp in attP40; VT018689-ZpGdbd in attP2
SS01070	20210219_41_B2	A01	Wed Mar 10 13:11:20 EST 2021	219869	ditp_ss_screen_review	UAS_Chrimson_Venus_X_0070	Card	attP40; attP2	Sample#2909588183060578402	f	Descending Interneuron	Shigehiro Namiki	GMR_SS01070	GMR_SS01070-20210219_41_B2	Drosophila melanogaster	20x	w; 38H06-p65ADZp in attP40; 65D06-ZpGdbd in attP2
SS01070	20210219_41_G2	A01	Wed Mar 10 13:11:21 EST 2021	219869	ditp_ss_screen_review	UAS_Chrimson_Venus_X_0070	Card	attP40; attP2	Sample#2909588186898366562	m	Descending Interneuron	Shigehiro Namiki	GMR_SS01070	GMR_SS01070-20210219_41_G2	Drosophila melanogaster	20x	w; 38H06-p65ADZp in attP40; 65D06-ZpGdbd in attP2
SS01071	20210219_41_C2	A01	Wed Mar 10 13:11:20 EST 2021	219875	ditp_ss_screen_review	UAS_Chrimson_Venus_X_0070	Card	attP40; attP2	Sample#2909588183983325282	f	Descending Interneuron	Shigehiro Namiki	GMR_SS01071	GMR_SS01071-20210219_41_C2	Drosophila melanogaster	20x	w; 40H12-p65ADZp in attP40; 85H01-ZpGdbd in attP2
SS01071	20210219_41_H2	A01	Wed Mar 10 13:11:21 EST 2021	219875	ditp_ss_screen_review	UAS_Chrimson_Venus_X_0070	Card	attP40; attP2	Sample#2909588187816919138	m	Descending Interneuron	Shigehiro Namiki	GMR_SS01071	GMR_SS01071-20210219_41_H2	Drosophila melanogaster	20x	w; 40H12-p65ADZp in attP40; 85H01-ZpGdbd in attP2
SS01072	20220128_46_I1	A01	Thu Feb 10 16:15:08 EST 2022	243574	ditp_ss_screen_review	UAS_Chrimson_Venus_X_0070	Card	attP40; attP2	Sample#3031759150649442402	f	Descending Interneuron	Shigehiro Namiki	GMR_SS01072	GMR_SS01072-20220128_46_I1	Drosophila melanogaster	20x	w; 42B02-p65ADZp in attP40/CyO::Tb-RFP; 65C02-ZpGdbd in attP2
SS01072	20220128_46_I4	A01	Thu Feb 10 16:15:08 EST 2022	243574	ditp_ss_screen_review	UAS_Chrimson_Venus_X_0070	Card	attP40; attP2	Sample#3031759151010152546	m	Descending Interneuron	Shigehiro Namiki	GMR_SS01072	GMR_SS01072-20220128_46_I4	Drosophila melanogaster	20x	w; 42B02-p65ADZp in attP40/CyO::Tb-RFP; 65C02-ZpGdbd in attP2
SS01074	20191218_47_E6	A01	Sat Jan 18 11:10:41 EST 2020	205438	ditp_ss_screen_review	UAS_Chrimson_Venus_X_0070	Card	attP40; attP2	Sample#2758442080299647074	m			GMR_SS01074	GMR_SS01074-20191218_47_E6	Drosophila melanogaster	20x	w; 42B02-p65ADZp in attP40; 89B01-ZpGdbd in attP2
SS01074	20191218_48_E6	A01	Thu Jan 23 15:43:10 EST 2020	205438	ditp_ss_screen_review	UAS_Chrimson_Venus_X_0070	Card	attP40; attP2	Sample#2760322591360024674	f			GMR_SS01074	GMR_SS01074-20191218_48_E6	Drosophila melanogaster	20x	w; 42B02-p65ADZp in attP40; 89B01-ZpGdbd in attP2
SS01076	20210219_41_B1	A01	Wed Mar 10 13:11:20 EST 2021	219868	ditp_ss_screen_review	UAS_Chrimson_Venus_X_0070	Card	attP40; attP2	Sample#2909588182905389154	f	Descending Interneuron	Shigehiro Namiki	GMR_SS01076	GMR_SS01076-20210219_41_B1	Drosophila melanogaster	20x	w; 50D07-p65ADZp in attP40/CyO::Tb-RFP; 74C01-ZpGdbd in attP2/TM6B
SS01076	20210219_41_G1	A01	Wed Mar 10 13:11:21 EST 2021	219868	ditp_ss_screen_review	UAS_Chrimson_Venus_X_0070	Card	attP40; attP2	Sample#2909588186743177314	m	Descending Interneuron	Shigehiro Namiki	GMR_SS01076	GMR_SS01076-20210219_41_G1	Drosophila melanogaster	20x	w; 50D07-p65ADZp in attP40/CyO::Tb-RFP; 74C01-ZpGdbd in attP2/TM6B
SS01078	20191218_47_E1	A01	Sat Jan 18 11:11:09 EST 2020	205440	ditp_ss_screen_review	UAS_Chrimson_Venus_X_0070	Card	attP40; attP2	Sample#2758442199292051554	m			GMR_SS01078	GMR_SS01078-20191218_47_E1	Drosophila melanogaster	20x	w; 69C11-p65ADZp in attP40; 81D05-ZpGdbd in attP2
SS01078	20191218_48_E1	A01	Thu Jan 23 15:43:09 EST 2020	205440	ditp_ss_screen_review	UAS_Chrimson_Venus_X_0070	Card	attP40; attP2	Sample#2760322590219173986	f			GMR_SS01078	GMR_SS01078-20191218_48_E1	Drosophila melanogaster	20x	w; 69C11-p65ADZp in attP40; 81D05-ZpGdbd in attP2
SS01080	20191218_47_A5	A01	Sat Jan 18 11:11:09 EST 2020	205420	ditp_ss_screen_review	UAS_Chrimson_Venus_X_0070	Card	attP40; attP2	Sample#2758442200340627554	m			GMR_SS01080	GMR_SS01080-20191218_47_A5	Drosophila melanogaster	20x	w; 84B12-p65ADZp in attP40; VT048835-ZpGdbd in attP2/TM6B
SS01080	20191218_48_A5	A01	Thu Jan 23 15:43:08 EST 2020	205420	ditp_ss_screen_review	UAS_Chrimson_Venus_X_0070	Card	attP40; attP2	Sample#2760322585609633890	f			GMR_SS01080	GMR_SS01080-20191218_48_A5	Drosophila melanogaster	20x	w; 84B12-p65ADZp in attP40; VT048835-ZpGdbd in attP2/TM6B
SS01082	20220527_44_C6	A01	Thu Jun 09 09:34:09 EDT 2022	246783	nerna_ss_screen_review	UAS_Chrimson_Venus_X_0070	Rubin	attP40; attP2	Sample#3074767293842980962	f	Rubin	Aljoscha Nern	GMR_SS01082	GMR_SS01082-20220527_44_C6	Drosophila melanogaster	20x	w; 11C05-p65ADZp in attP40; Trh-ZpGDBD in attP2
SS01082	20220527_44_F6	A01	Thu Jun 09 09:34:09 EDT 2022	246783	nerna_ss_screen_review	UAS_Chrimson_Venus_X_0070	Rubin	attP40; attP2	Sample#3074767295860441186	m	Rubin	Aljoscha Nern	GMR_SS01082	GMR_SS01082-20220527_44_F6	Drosophila melanogaster	20x	w; 11C05-p65ADZp in attP40; Trh-ZpGDBD in attP2
SS01090	20230120_44_C1	A01	Thu Feb 02 13:19:08 EST 2023	253404	asoy_ss_screen_review	UAS_Chrimson_Venus_X_0070	Aso	attP40; attP2	Sample#3161087324243099746	f	Aso	Yoshi Aso	BJD_SS01090	BJD_SS01090-20230120_44_C1	Drosophila melanogaster	20x	w; VT001606-p65ADZp in attP40; VT030609-ZpGdbd in attP2
SS01090	20230120_44_F5	A01	Thu Feb 02 13:19:08 EST 2023	253404	asoy_ss_screen_review	UAS_Chrimson_Venus_X_0070	Aso	attP40; attP2	Sample#3161087326650630242	m	Aso	Yoshi Aso	BJD_SS01090	BJD_SS01090-20230120_44_F5	Drosophila melanogaster	20x	w; VT001606-p65ADZp in attP40; VT030609-ZpGdbd in attP2
SS01100	20200717_47_A3	A01	Sat Aug 22 12:55:07 EDT 2020	212458	asoy_ss_screen_review	UAS_Chrimson_Venus_X_0070	Aso	attP40; attP2	Sample#2837091429023481954	f			GMR_SS01100	GMR_SS01100-20200717_47_A3	Drosophila melanogaster	20x	w; VT058568-p65ADZp in attP40; VT026020-ZpGdbd in attP2
SS01100	20200717_47_D4	A01	Sat Aug 22 12:55:09 EDT 2020	212458	asoy_ss_screen_review	UAS_Chrimson_Venus_X_0070	Aso	attP40; attP2	Sample#2837091436237684834	m			GMR_SS01100	GMR_SS01100-20200717_47_D4	Drosophila melanogaster	20x	w; VT058568-p65ADZp in attP40; VT026020-ZpGdbd in attP2
SS01108	20200710_43_E1	A01	Wed Jul 29 14:38:11 EDT 2020	212448	asoy_ss_screen_review	UAS_Chrimson_Venus_X_0070	Rubin	attP40; attP2	Sample#2828420060404514914	f			GMR_SS01108	GMR_SS01108-20200710_43_E1	Drosophila melanogaster	20x	w; VT039458-p65ADZp in attP40/CyO,Tb; VT015830-ZpGdbd in attP2
SS01108	20200710_44_D6	A01	Tue Jul 28 16:30:39 EDT 2020	212448	asoy_ss_screen_review	UAS_Chrimson_Venus_X_0070	Rubin	attP40; attP2	Sample#2828085973131198562	m			GMR_SS01108	GMR_SS01108-20200710_44_D6	Drosophila melanogaster	20x	w; VT039458-p65ADZp in attP40/CyO,Tb; VT015830-ZpGdbd in attP2
SS01111	20230120_44_B4	A01	Thu Feb 02 13:19:08 EST 2023	253401	asoy_ss_screen_review	UAS_Chrimson_Venus_X_0070	Aso	attP40; attP2	Sample#3161087323911749730	f	Aso	Yoshi Aso	GMR_SS01111	GMR_SS01111-20230120_44_B4	Drosophila melanogaster	20x	w; VT048942-p65ADZp in attP40; VT014097-ZpGdbd in attP2
SS01111	20230120_44_F2	A01	Thu Feb 02 13:19:08 EST 2023	253401	asoy_ss_screen_review	UAS_Chrimson_Venus_X_0070	Aso	attP40; attP2	Sample#3161087326336057442	m	Aso	Yoshi Aso	GMR_SS01111	GMR_SS01111-20230120_44_F2	Drosophila melanogaster	20x	w; VT048942-p65ADZp in attP40; VT014097-ZpGdbd in attP2
SS01127	20230120_44_C3	A01	Thu Feb 02 13:19:08 EST 2023	253406	asoy_ss_screen_review	UAS_Chrimson_Venus_X_0070	Aso	attP40; attP2	Sample#3161087324465397858	f	Aso	Yoshi Aso	GMR_SS01127	GMR_SS01127-20230120_44_C3	Drosophila melanogaster	20x	w; 14C08-p65ADZp in attP40; VT065306-ZpGdbd in attP2
SS01127	20230120_44_G1	A01	Thu Feb 02 13:19:08 EST 2023	253406	asoy_ss_screen_review	UAS_Chrimson_Venus_X_0070	Aso	attP40; attP2	Sample#3161087326864539746	m	Aso	Yoshi Aso	GMR_SS01127	GMR_SS01127-20230120_44_G1	Drosophila melanogaster	20x	w; 14C08-p65ADZp in attP40; VT065306-ZpGdbd in attP2
SS01132	20230120_44_B5	A01	Thu Feb 02 13:19:08 EST 2023	253402	asoy_ss_screen_review	UAS_Chrimson_Venus_X_0070	Aso	su(Hw)attP1, attP2	Sample#3161087324020801634	f	Aso	Yoshi Aso	GMR_SS01132	GMR_SS01132-20230120_44_B5	Drosophila melanogaster	20x	w;; 19G08-p65ADZp in su(Hw)attP1, VT033006-ZpGdbd in attP2/TM3
SS01132	20230120_44_F3	A01	Thu Feb 02 13:19:08 EST 2023	253402	asoy_ss_screen_review	UAS_Chrimson_Venus_X_0070	Aso	su(Hw)attP1, attP2	Sample#3161087326440915042	m	Aso	Yoshi Aso	GMR_SS01132	GMR_SS01132-20230120_44_F3	Drosophila melanogaster	20x	w;; 19G08-p65ADZp in su(Hw)attP1, VT033006-ZpGdbd in attP2/TM3
SS01147	20200717_47_B3	A01	Sat Aug 22 12:55:07 EDT 2020	212464	asoy_ss_screen_review	UAS_Chrimson_Venus_X_0070	Aso	attP40; attP2	Sample#2837091431233880162	f			GMR_SS01147	GMR_SS01147-20200717_47_B3	Drosophila melanogaster	20x	w; 26B04-p65ADZp in attP40/CyO,Tb; VT033006-ZpGdbd in attP2/TM6B
SS01147	20200717_47_E4	A01	Sat Aug 22 12:55:09 EDT 2020	212464	asoy_ss_screen_review	UAS_Chrimson_Venus_X_0070	Aso	attP40; attP2	Sample#2837091438326448226	m			GMR_SS01147	GMR_SS01147-20200717_47_E4	Drosophila melanogaster	20x	w; 26B04-p65ADZp in attP40/CyO,Tb; VT033006-ZpGdbd in attP2/TM6B
SS01154	20230120_44_A6	A01	Thu Feb 02 13:19:08 EST 2023	253397	asoy_ss_screen_review	UAS_Chrimson_Venus_X_0070	Aso	attP40; attP2	Sample#3161087323467153506	f	Aso	Yoshi Aso	GMR_SS01154	GMR_SS01154-20230120_44_A6	Drosophila melanogaster	20x	w; 33E02-p65ADZp in attP40; VT007770-ZpGdbd in attP2
SS01154	20230120_44_E4	A01	Thu Feb 02 13:19:08 EST 2023	253397	asoy_ss_screen_review	UAS_Chrimson_Venus_X_0070	Aso	attP40; attP2	Sample#3161087325908238434	m	Aso	Yoshi Aso	GMR_SS01154	GMR_SS01154-20230120_44_E4	Drosophila melanogaster	20x	w; 33E02-p65ADZp in attP40; VT007770-ZpGdbd in attP2
SS01160	20230120_44_C2	A01	Thu Feb 02 13:19:08 EST 2023	253405	asoy_ss_screen_review	UAS_Chrimson_Venus_X_0070	Aso	attP40; attP2	Sample#3161087324356345954	f	Aso	Yoshi Aso	GMR_SS01160	GMR_SS01160-20230120_44_C2	Drosophila melanogaster	20x	w; 41C05-p65ADZp in attP40; VT058568-ZpGdbd in attP2
SS01160	20230120_44_F6	A01	Thu Feb 02 13:19:08 EST 2023	253405	asoy_ss_screen_review	UAS_Chrimson_Venus_X_0070	Aso	attP40; attP2	Sample#3161087326759682146	m	Aso	Yoshi Aso	GMR_SS01160	GMR_SS01160-20230120_44_F6	Drosophila melanogaster	20x	w; 41C05-p65ADZp in attP40; VT058568-ZpGdbd in attP2
SS01168	20200710_43_B1	A01	Wed Jul 29 14:38:10 EDT 2020	212383	asoy_ss_screen_review	UAS_Chrimson_Venus_X_0070	Aso	attP40; attP2	Sample#2828420053911732322	f			GMR_SS01168	GMR_SS01168-20200710_43_B1	Drosophila melanogaster	20x	w; 49F09-p65ADZp in attP40/CyO,Tb; VT013594-ZpGdbd in attP2/TM6B
SS01168	20200710_44_A6	A01	Tue Jul 28 16:30:37 EDT 2020	212383	asoy_ss_screen_review	UAS_Chrimson_Venus_X_0070	Aso	attP40; attP2	Sample#2828085966495809634	m			GMR_SS01168	GMR_SS01168-20200710_44_A6	Drosophila melanogaster	20x	w; 49F09-p65ADZp in attP40/CyO,Tb; VT013594-ZpGdbd in attP2/TM6B
SS01171	20200717_47_C2	A01	Sat Aug 22 12:55:08 EDT 2020	212469	asoy_ss_screen_review	UAS_Chrimson_Venus_X_0070	Aso	attP40; attP2	Sample#2837091433255534690	f			GMR_SS01171	GMR_SS01171-20200717_47_C2	Drosophila melanogaster	20x	w; 49F09-p65ADZp in attP40; VT050157-ZpGdbd in attP2/TM6B
SS01171	20200717_47_F3	A01	Sat Aug 22 12:55:10 EDT 2020	212469	asoy_ss_screen_review	UAS_Chrimson_Venus_X_0070	Aso	attP40; attP2	Sample#2837091440394240098	m			GMR_SS01171	GMR_SS01171-20200717_47_F3	Drosophila melanogaster	20x	w; 49F09-p65ADZp in attP40; VT050157-ZpGdbd in attP2/TM6B
SS01188	20230113_42_C3	A01	Mon Jan 30 14:00:39 EST 2023	253391	asoy_ss_screen_review	UAS_Chrimson_Venus_X_0070	Aso	attP40; attP2	Sample#3160010611224477794	f	Aso	Yoshi Aso	GMR_SS01188	GMR_SS01188-20230113_42_C3	Drosophila melanogaster	20x	w; 53C03-p65ADZp in attP40; VT043788-ZpGdbd in attP2
SS01188	20230113_42_F1	A01	Mon Jan 30 14:00:40 EST 2023	253391	asoy_ss_screen_review	UAS_Chrimson_Venus_X_0070	Aso	attP40; attP2	Sample#3160010612981891170	m	Aso	Yoshi Aso	GMR_SS01188	GMR_SS01188-20230113_42_F1	Drosophila melanogaster	20x	w; 53C03-p65ADZp in attP40; VT043788-ZpGdbd in attP2
SS01189	20200710_43_D6	A01	Wed Jul 29 14:38:11 EDT 2020	212447	asoy_ss_screen_review	UAS_Chrimson_Venus_X_0070	Aso	attP40; attP2	Sample#2828420060043804770	f			GMR_SS01189	GMR_SS01189-20200710_43_D6	Drosophila melanogaster	20x	w; 54A11-p65ADZp in attP40; VT033006-ZpGdbd in attP2
SS01189	20200710_44_D5	A01	Tue Jul 28 16:30:39 EDT 2020	212447	asoy_ss_screen_review	UAS_Chrimson_Venus_X_0070	Aso	attP40; attP2	Sample#2828085972791459938	m			GMR_SS01189	GMR_SS01189-20200710_44_D5	Drosophila melanogaster	20x	w; 54A11-p65ADZp in attP40; VT033006-ZpGdbd in attP2
SS01196	20200710_43_A6	A01	Wed Jul 29 14:38:10 EDT 2020	212386	asoy_ss_screen_review	UAS_Chrimson_Venus_X_0070	Aso	attP40; attP2	Sample#2828420053551022178	f			GMR_SS01196	GMR_SS01196-20200710_43_A6	Drosophila melanogaster	20x	w; 67A12-p65ADZp in attP40/CyO,Tb; VT058720-ZpGdbd in attP2
SS01196	20200710_44_A5	A01	Tue Jul 28 16:30:37 EDT 2020	212386	asoy_ss_screen_review	UAS_Chrimson_Venus_X_0070	Aso	attP40; attP2	Sample#2828085966118322274	m			GMR_SS01196	GMR_SS01196-20200710_44_A5	Drosophila melanogaster	20x	w; 67A12-p65ADZp in attP40/CyO,Tb; VT058720-ZpGdbd in attP2
SS01197	20200306_42_A1	A01	Wed Jun 10 11:06:37 EDT 2020	209960	asoy_ss_screen_review	UAS_Chrimson_Venus_X_0070	Aso		Sample#2810609809651400802	f			GMR_SS01197	GMR_SS01197-20200306_42_A1	Drosophila melanogaster	20x	w; 67A12-p65ADZp in attP40; VT015830-ZpGdbd in attP2
SS01197	20200306_42_F1	A01	Wed Jun 10 11:06:38 EDT 2020	209960	asoy_ss_screen_review	UAS_Chrimson_Venus_X_0070	Aso		Sample#2810609814353215586	m			GMR_SS01197	GMR_SS01197-20200306_42_F1	Drosophila melanogaster	20x	w; 67A12-p65ADZp in attP40; VT015830-ZpGdbd in attP2
SS01199	20230120_44_B6	A01	Thu Feb 02 13:19:08 EST 2023	253403	asoy_ss_screen_review	UAS_Chrimson_Venus_X_0070	Aso	VK00027, attP2	Sample#3161087324134047842	f	Aso	Yoshi Aso	GMR_SS01199	GMR_SS01199-20230120_44_B6	Drosophila melanogaster	20x	w;; 72C11-p65ADZp in VK00027, VT033006-ZpGdbd in attP2
SS01199	20230120_44_F4	A01	Thu Feb 02 13:19:08 EST 2023	253403	asoy_ss_screen_review	UAS_Chrimson_Venus_X_0070	Aso	VK00027, attP2	Sample#3161087326545772642	m	Aso	Yoshi Aso	GMR_SS01199	GMR_SS01199-20230120_44_F4	Drosophila melanogaster	20x	w;; 72C11-p65ADZp in VK00027, VT033006-ZpGdbd in attP2
SS01202	20200306_42_C4	A01	Wed Jun 10 11:06:37 EDT 2020	209999	asoy_ss_screen_review	UAS_Chrimson_Venus_X_0070	Rubin		Sample#2810609812155400290	f			GMR_SS01202	GMR_SS01202-20200306_42_C4	Drosophila melanogaster	20x	w; 76G04-p65ADZp in attP40; VT058720-ZpGdbd in attP2
SS01202	20200306_42_H4	A01	Wed Jun 10 11:06:38 EDT 2020	209999	asoy_ss_screen_review	UAS_Chrimson_Venus_X_0070	Rubin		Sample#2810609816655888482	m			GMR_SS01202	GMR_SS01202-20200306_42_H4	Drosophila melanogaster	20x	w; 76G04-p65ADZp in attP40; VT058720-ZpGdbd in attP2
SS01203	20230721_47_C2	A01	Thu Aug 03 16:43:05 EDT 2023	258673	asoy_ss_screen_review	UAS_Chrimson_Venus_X_0070	Aso	attP40; attP2	Sample#3227078144078905503	f	Aso	Yoshi Aso	GMR_SS01203	GMR_SS01203-20230721_47_C2	Drosophila melanogaster	20x	w; 80G12-p65ADZp in attP40/CyO,Tb; VT047171-ZpGdbd in attP2
SS01203	20230721_47_F3	A01	Thu Aug 03 16:43:05 EDT 2023	258673	asoy_ss_screen_review	UAS_Chrimson_Venus_X_0070	Aso	attP40; attP2	Sample#3227078144661913759	m	Aso	Yoshi Aso	GMR_SS01203	GMR_SS01203-20230721_47_F3	Drosophila melanogaster	20x	w; 80G12-p65ADZp in attP40/CyO,Tb; VT047171-ZpGdbd in attP2
SS01208	20200306_42_A5	A01	Wed Jun 10 11:06:37 EDT 2020	209964	asoy_ss_screen_review	UAS_Chrimson_Venus_X_0070	Aso		Sample#2810609810423152738	f			GMR_SS01208	GMR_SS01208-20200306_42_A5	Drosophila melanogaster	20x	w; 95A10-p65ADZp in attP40; VT019391-ZpGdbd in attP2
SS01208	20200306_42_F5	A01	Wed Jun 10 11:06:38 EDT 2020	209964	asoy_ss_screen_review	UAS_Chrimson_Venus_X_0070	Aso		Sample#2810609815011721314	m			GMR_SS01208	GMR_SS01208-20200306_42_F5	Drosophila melanogaster	20x	w; 95A10-p65ADZp in attP40; VT019391-ZpGdbd in attP2
SS01210	20230421_46_D6	A01	Tue May 02 09:33:06 EDT 2023	256161	asoy_ss_screen_review	UAS_Chrimson_Venus_X_0070	Aso	attP40; attP2	Sample#3193267861762080927	f	Aso	Yoshi Aso	GMR_SS01210	GMR_SS01210-20230421_46_D6	Drosophila melanogaster	20x	w; Tdc2-p65ADZp in attP40/CyO,Tb; VT019841-ZpGdbd in attP2
SS01210	20230421_46_H1	A01	Tue May 02 09:33:07 EDT 2023	256161	asoy_ss_screen_review	UAS_Chrimson_Venus_X_0070	Aso	attP40; attP2	Sample#3193267864991695007	m	Aso	Yoshi Aso	GMR_SS01210	GMR_SS01210-20230421_46_H1	Drosophila melanogaster	20x	w; Tdc2-p65ADZp in attP40/CyO,Tb; VT019841-ZpGdbd in attP2
SS01216	20230421_46_C6	A01	Tue May 02 09:33:06 EDT 2023	256160	asoy_ss_screen_review	UAS_Chrimson_Venus_X_0070	Aso	attP40; attP2	Sample#3193267860717699231	f	Aso	Yoshi Aso	GMR_SS01216	GMR_SS01216-20230421_46_C6	Drosophila melanogaster	20x	w; Tdc2-p65ADZp in attP40; VT046247-ZpGdbd in attP2
SS01216	20230421_46_G1	A01	Tue May 02 09:33:06 EDT 2023	256160	asoy_ss_screen_review	UAS_Chrimson_Venus_X_0070	Aso	attP40; attP2	Sample#3193267863964090527	m	Aso	Yoshi Aso	GMR_SS01216	GMR_SS01216-20230421_46_G1	Drosophila melanogaster	20x	w; Tdc2-p65ADZp in attP40; VT046247-ZpGdbd in attP2
SS01217	20200710_43_G3	A01	Wed Jul 29 14:38:13 EDT 2020	212334	asoy_ss_screen_review	UAS_Chrimson_Venus_X_0070	Aso	attP40; attP2	Sample#2828420065597063266	f			GMR_SS01217	GMR_SS01217-20200710_43_G3	Drosophila melanogaster	20x	w; Tdc2-p65ADZp in attP40/CyO,Tb; VT039419-ZpGdbd in attP2
SS01217	20200710_44_G2	A01	Tue Jul 28 16:30:40 EDT 2020	212334	asoy_ss_screen_review	UAS_Chrimson_Venus_X_0070	Aso	attP40; attP2	Sample#2828085978202112098	m			GMR_SS01217	GMR_SS01217-20200710_44_G2	Drosophila melanogaster	20x	w; Tdc2-p65ADZp in attP40/CyO,Tb; VT039419-ZpGdbd in attP2
SS01241	20200313_47_A4	A01	Thu Jun 11 15:12:05 EDT 2020	210411	asoy_ss_screen_review	UAS_Chrimson_Venus_X_0070	Aso	attP40; attP2	Sample#2811033973793226850	m			GMR_SS01241	GMR_SS01241-20200313_47_A4	Drosophila melanogaster	20x	w; VT064246-p65ADZp in attP40; 13F04-ZpGdbd in attP2/TM6B
SS01241	20200313_47_C4	A01	Thu Jun 11 15:12:06 EDT 2020	210411	asoy_ss_screen_review	UAS_Chrimson_Venus_X_0070	Aso	attP40; attP2	Sample#2811033975244456034	f			GMR_SS01241	GMR_SS01241-20200313_47_C4	Drosophila melanogaster	20x	w; VT064246-p65ADZp in attP40; 13F04-ZpGdbd in attP2/TM6B
SS01262	20200313_47_B2	A01	Thu Jun 11 15:12:05 EDT 2020	210407	asoy_ss_screen_review	UAS_Chrimson_Venus_X_0070	Rubin	attP40; attP2	Sample#2811033974258794594	m			GMR_SS01262	GMR_SS01262-20200313_47_B2	Drosophila melanogaster	20x	w; VT029592-p65ADZp in attP40; 19B06-ZpGDBD in attP2
SS01262	20200313_47_D2	A01	Thu Jun 11 15:12:06 EDT 2020	210407	asoy_ss_screen_review	UAS_Chrimson_Venus_X_0070	Rubin	attP40; attP2	Sample#2811033975705829474	f			GMR_SS01262	GMR_SS01262-20200313_47_D2	Drosophila melanogaster	20x	w; VT029592-p65ADZp in attP40; 19B06-ZpGDBD in attP2
SS01269	20200306_42_E4	A01	Wed Jun 10 11:06:38 EDT 2020	210001	asoy_ss_screen_review	UAS_Chrimson_Venus_X_0070	Rubin		Sample#2810609813912813666	f			GMR_SS01269	GMR_SS01269-20200306_42_E4	Drosophila melanogaster	20x	w; VT033006-p65ADZp in attP40; 20G07-ZpGdbd in attP2
SS01269	20200306_42_J4	A01	Wed Jun 10 11:06:39 EDT 2020	210001	asoy_ss_screen_review	UAS_Chrimson_Venus_X_0070	Rubin		Sample#2810609818438467682	m			GMR_SS01269	GMR_SS01269-20200306_42_J4	Drosophila melanogaster	20x	w; VT033006-p65ADZp in attP40; 20G07-ZpGdbd in attP2
SS01298	20200710_43_D2	A01	Wed Jul 29 14:38:11 EDT 2020	212443	asoy_ss_screen_review	UAS_Chrimson_Venus_X_0070	Aso	attP40; attP2	Sample#2828420058651295842	f			GMR_SS01298	GMR_SS01298-20200710_43_D2	Drosophila melanogaster	20x	w; VT037580-p65ADZp in attP40/CyO,Tb; 24H08-ZpGdbd in attP2
SS01298	20200710_44_D1	A01	Tue Jul 28 16:30:38 EDT 2020	212443	asoy_ss_screen_review	UAS_Chrimson_Venus_X_0070	Aso	attP40; attP2	Sample#2828085971445088354	m			GMR_SS01298	GMR_SS01298-20200710_44_D1	Drosophila melanogaster	20x	w; VT037580-p65ADZp in attP40/CyO,Tb; 24H08-ZpGdbd in attP2
SS01308	20200710_43_D3	A01	Wed Jul 29 14:38:11 EDT 2020	212444	asoy_ss_screen_review	UAS_Chrimson_Venus_X_0070	Rubin	attP40; attP2	Sample#2828420058986840162	f			GMR_SS01308	GMR_SS01308-20200710_43_D3	Drosophila melanogaster	20x	w; VT050240-p65ADZp in attP40; 27G01-ZpGdbd in attP2/TM6B
SS01308	20200710_44_D2	A01	Tue Jul 28 16:30:38 EDT 2020	212444	asoy_ss_screen_review	UAS_Chrimson_Venus_X_0070	Rubin	attP40; attP2	Sample#2828085971784826978	m			GMR_SS01308	GMR_SS01308-20200710_44_D2	Drosophila melanogaster	20x	w; VT050240-p65ADZp in attP40; 27G01-ZpGdbd in attP2/TM6B
SS01318	20200710_43_C4	A01	Wed Jul 29 14:38:11 EDT 2020	212439	asoy_ss_screen_review	UAS_Chrimson_Venus_X_0070	Rubin	attP40; attP2	Sample#2828420057183289442	f			GMR_SS01318	GMR_SS01318-20200710_43_C4	Drosophila melanogaster	20x	w; VT033006-p65ADZp in attP40; 33H11-ZpGdbd in attP2
SS01318	20200710_44_C3	A01	Tue Jul 28 16:30:38 EDT 2020	212439	asoy_ss_screen_review	UAS_Chrimson_Venus_X_0070	Rubin	attP40; attP2	Sample#2828085970086133858	m			GMR_SS01318	GMR_SS01318-20200710_44_C3	Drosophila melanogaster	20x	w; VT033006-p65ADZp in attP40; 33H11-ZpGdbd in attP2
SS01388	20200710_43_B2	A01	Wed Jul 29 14:38:10 EDT 2020	212431	asoy_ss_screen_review	UAS_Chrimson_Venus_X_0070	Rubin	attP40; attP2	Sample#2828420054394077282	f			GMR_SS01388	GMR_SS01388-20200710_43_B2	Drosophila melanogaster	20x	w; VT063192-p65ADZp in attP40; 64F07-ZpGdbd in attP2/TM6B
SS01388	20200710_44_B1	A01	Tue Jul 28 16:30:37 EDT 2020	212431	asoy_ss_screen_review	UAS_Chrimson_Venus_X_0070	Rubin	attP40; attP2	Sample#2828085966856519778	m			GMR_SS01388	GMR_SS01388-20200710_44_B1	Drosophila melanogaster	20x	w; VT063192-p65ADZp in attP40; 64F07-ZpGdbd in attP2/TM6B
SS01390	20200710_43_H2	A01	Wed Jul 29 14:38:13 EDT 2020	212326	asoy_ss_screen_review	UAS_Chrimson_Venus_X_0070	Aso	attP40; attP2	Sample#2828420067329310818	f			GMR_SS01390	GMR_SS01390-20200710_43_H2	Drosophila melanogaster	20x	w; VT033006-p65ADZp in attP40; 65D07-ZpGdbd in attP2
SS01390	20200710_44_H1	A01	Tue Jul 28 16:30:40 EDT 2020	212326	asoy_ss_screen_review	UAS_Chrimson_Venus_X_0070	Aso	attP40; attP2	Sample#2828085980173434978	m			GMR_SS01390	GMR_SS01390-20200710_44_H1	Drosophila melanogaster	20x	w; VT033006-p65ADZp in attP40; 65D07-ZpGdbd in attP2
SS01391	20200710_41_H1	A01	Fri Jul 24 13:48:09 EDT 2020	212331	asoy_ss_screen_review	UAS_Chrimson_Venus_X_0070	Aso	attP40; attP2	Sample#2826595527183827042	f			GMR_SS01391	GMR_SS01391-20200710_41_H1	Drosophila melanogaster	20x	w; VT033006-p65ADZp in attP40; 66B02-ZpGdbd in attP2
SS01391	20200710_42_F6	A01	Fri Jul 24 14:16:42 EDT 2020	212331	asoy_ss_screen_review	UAS_Chrimson_Venus_X_0070	Aso	attP40; attP2	Sample#2826602714245365858	m			GMR_SS01391	GMR_SS01391-20200710_42_F6	Drosophila melanogaster	20x	w; VT033006-p65ADZp in attP40; 66B02-ZpGdbd in attP2
SS01396	20200710_41_G1	A01	Fri Jul 24 11:59:37 EDT 2020	212335	asoy_ss_screen_review	UAS_Chrimson_Venus_X_0070	Aso	attP40; attP2	Sample#2826568215721672802	f			GMR_SS01396	GMR_SS01396-20200710_41_G1	Drosophila melanogaster	20x	w; VT007770-p65ADZp in attP40/CyO,Tb; 71D08-ZpGdbd in attP2/TM6B
SS01396	20200710_42_F1	A01	Fri Jul 24 14:16:42 EDT 2020	212335	asoy_ss_screen_review	UAS_Chrimson_Venus_X_0070	Aso	attP40; attP2	Sample#2826602712248877154	m			GMR_SS01396	GMR_SS01396-20200710_42_F1	Drosophila melanogaster	20x	w; VT007770-p65ADZp in attP40/CyO,Tb; 71D08-ZpGdbd in attP2/TM6B
SS01427	20230421_46_E1	A01	Tue May 02 09:33:06 EDT 2023	256163	asoy_ss_screen_review	UAS_Chrimson_Venus_X_0070	Aso	attP40; attP2	Sample#3193267861929853087	f	Aso	Yoshi Aso	GMR_SS01427	GMR_SS01427-20230421_46_E1	Drosophila melanogaster	20x	w; VT019391-p65ADZp in attP40; Tdc2-ZpGDBD in attP2/TM6B
SS01427	20230421_46_H2	A01	Tue May 02 09:33:07 EDT 2023	256163	asoy_ss_screen_review	UAS_Chrimson_Venus_X_0070	Aso	attP40; attP2	Sample#3193267865159467167	m	Aso	Yoshi Aso	GMR_SS01427	GMR_SS01427-20230421_46_H2	Drosophila melanogaster	20x	w; VT019391-p65ADZp in attP40; Tdc2-ZpGDBD in attP2/TM6B
SS01475	20230908_43_C1	A01	Mon Sep 18 17:26:34 EDT 2023	260370	wangk11_ss_screen_review	UAS_Chrimson_Venus_X_0070	Dickson	attP40; attP2	Sample#3243758929166991519	f	Dickson	Kaiyu Wang	GMR_SS01475	GMR_SS01475-20230908_43_C1	Drosophila melanogaster	20x	w; VT029591-p65ADZp in attP40; VT040973-ZpGDBD in attP2
SS01475	20230908_43_D5	A01	Mon Sep 18 17:26:35 EDT 2023	260370	wangk11_ss_screen_review	UAS_Chrimson_Venus_X_0070	Dickson	attP40; attP2	Sample#3243758930467225759	m	Dickson	Kaiyu Wang	GMR_SS01475	GMR_SS01475-20230908_43_D5	Drosophila melanogaster	20x	w; VT029591-p65ADZp in attP40; VT040973-ZpGDBD in attP2
SS01491	20230324_43_B3	A01	Tue Apr 04 09:19:37 EDT 2023	255203	wangk11_ss_screen_review	UAS_Chrimson_Venus_X_0070	Dickson	attP40; attP2	Sample#3183117607515455647	f	Dickson	Kaiyu Wang	GMR_SS01491	GMR_SS01491-20230324_43_B3	Drosophila melanogaster	20x	w; VT002064-p65ADZp in attP40; VT008469-ZpGdbd in attP2/TM6B
SS01491	20230324_44_B3	A01	Tue Apr 04 10:54:07 EDT 2023	255203	wangk11_ss_screen_review	UAS_Chrimson_Venus_X_0070	Dickson	attP40; attP2	Sample#3183141392603938975	m	Dickson	Kaiyu Wang	GMR_SS01491	GMR_SS01491-20230324_44_B3	Drosophila melanogaster	20x	w; VT002064-p65ADZp in attP40; VT008469-ZpGdbd in attP2/TM6B
SS01506	20230331_45_B6	A01	Fri Apr 14 15:20:06 EDT 2023	255488	wangk11_ss_screen_review	UAS_Chrimson_Venus_X_0070	Dickson	attP40; attP2	Sample#3186832206903378079	f	Dickson	Kaiyu Wang	BJD_SS01506	BJD_SS01506-20230331_45_B6	Drosophila melanogaster	20x	w; VT038210-p65ADZp in attP40/CyOTb; VT026992-ZpGDBD in attP2/TM6B
SS01506	20230331_46_A6	A01	Fri Apr 14 14:58:35 EDT 2023	255488	wangk11_ss_screen_review	UAS_Chrimson_Venus_X_0070	Dickson	attP40; attP2	Sample#3186826793491366047	m	Dickson	Kaiyu Wang	BJD_SS01506	BJD_SS01506-20230331_46_A6	Drosophila melanogaster	20x	w; VT038210-p65ADZp in attP40/CyOTb; VT026992-ZpGDBD in attP2/TM6B
SS01516	20230331_45_C5	A01	Fri Apr 14 15:20:06 EDT 2023	255489	wangk11_ss_screen_review	UAS_Chrimson_Venus_X_0070	Dickson	attP40; attP2	Sample#3186832207490580639	f	Dickson	Kaiyu Wang	GMR_SS01516	GMR_SS01516-20230331_45_C5	Drosophila melanogaster	20x	w; VT050239-p65ADZp in attP40; VT028277-pZpGdbd in attP2
SS01516	20230331_46_E5	A01	Fri Apr 14 14:58:36 EDT 2023	255489	wangk11_ss_screen_review	UAS_Chrimson_Venus_X_0070	Dickson	attP40; attP2	Sample#3186826796288966815	m	Dickson	Kaiyu Wang	GMR_SS01516	GMR_SS01516-20230331_46_E5	Drosophila melanogaster	20x	w; VT050239-p65ADZp in attP40; VT028277-pZpGdbd in attP2
SS01539	20230407_43_A1	A01	Thu Apr 20 14:39:34 EDT 2023	255526	dicksonb_ss_screen_review	UAS_Chrimson_Venus_X_0070	Dickson	attP40; attP2	Sample#3188996333998440607	f	Dickson	Barry Dickson	GMR_SS01539	GMR_SS01539-20230407_43_A1	Drosophila melanogaster	20x	w; 71G01-p65ADZp in attP40; VT054805-pZpGdbd in attP2
SS01539	20230407_43_C5	A01	Thu Apr 20 14:39:35 EDT 2023	255526	dicksonb_ss_screen_review	UAS_Chrimson_Venus_X_0070	Dickson	attP40; attP2	Sample#3188996335890071711	m	Dickson	Barry Dickson	GMR_SS01539	GMR_SS01539-20230407_43_C5	Drosophila melanogaster	20x	w; 71G01-p65ADZp in attP40; VT054805-pZpGdbd in attP2
SS01540	20191122_48_B1	A01	Fri Dec 06 15:13:19 EST 2019	204137	ditp_ss_screen_review	UAS_Chrimson_Venus_X_0070	Card	attP40; attP2	Sample#2742920463540813922	f			GMR_SS01540	GMR_SS01540-20191122_48_B1	Drosophila melanogaster	20x	w; VT023490-p65ADZp in attP40; 38F04-ZpGdbd in attP2
SS01540	20191122_48_C5	A01	Fri Dec 06 15:13:19 EST 2019	204137	ditp_ss_screen_review	UAS_Chrimson_Venus_X_0070	Card	attP40; attP2	Sample#2742920465403084898	m			GMR_SS01540	GMR_SS01540-20191122_48_C5	Drosophila melanogaster	20x	w; VT023490-p65ADZp in attP40; 38F04-ZpGdbd in attP2
SS01542	20191122_48_F6	A01	Fri Dec 06 15:13:20 EST 2019	204139	ditp_ss_screen_review	UAS_Chrimson_Venus_X_0070	Card	attP40; attP2	Sample#2742920468636893282	f			GMR_SS01542	GMR_SS01542-20191122_48_F6	Drosophila melanogaster	20x	w; VT028606-p65ADZp in attP40; 87B09-ZpGdbd in attP2
SS01542	20191122_48_H4	A01	Tue Dec 17 13:34:36 EST 2019	204139	ditp_ss_screen_review	UAS_Chrimson_Venus_X_0070	Card	attP40; attP2	Sample#2746881888575553634	m			GMR_SS01542	GMR_SS01542-20191122_48_H4	Drosophila melanogaster	20x	w; VT028606-p65ADZp in attP40; 87B09-ZpGdbd in attP2
SS01543	20191122_48_B4	A01	Fri Dec 06 15:13:19 EST 2019	204145	ditp_ss_screen_review	UAS_Chrimson_Venus_X_0070	Card	attP40; attP2	Sample#2742920464107044962	f			GMR_SS01543	GMR_SS01543-20191122_48_B4	Drosophila melanogaster	20x	w; VT043288-p65ADZp in attP40; VT028153-ZpGdbd in attP2
SS01543	20191122_48_D2	A01	Thu Dec 12 16:34:07 EST 2019	204145	ditp_ss_screen_review	UAS_Chrimson_Venus_X_0070	Card	attP40; attP2	Sample#2745115125630369890	m			GMR_SS01543	GMR_SS01543-20191122_48_D2	Drosophila melanogaster	20x	w; VT043288-p65ADZp in attP40; VT028153-ZpGdbd in attP2
SS01545	20191122_48_A6	A01	Fri Dec 06 15:13:19 EST 2019	204136	ditp_ss_screen_review	UAS_Chrimson_Venus_X_0070	Card	attP40; attP2	Sample#2742920463352070242	f			GMR_SS01545	GMR_SS01545-20191122_48_A6	Drosophila melanogaster	20x	w; VT001615-p65ADZp in attP40; VT043132-ZpGdbd in attP2
SS01545	20191122_48_C4	A01	Fri Dec 06 15:13:19 EST 2019	204136	ditp_ss_screen_review	UAS_Chrimson_Venus_X_0070	Card	attP40; attP2	Sample#2742920465218535522	m			GMR_SS01545	GMR_SS01545-20191122_48_C4	Drosophila melanogaster	20x	w; VT001615-p65ADZp in attP40; VT043132-ZpGdbd in attP2
SS01547	20191122_48_F2	A01	Fri Dec 06 15:13:20 EST 2019	204155	ditp_ss_screen_review	UAS_Chrimson_Venus_X_0070	Card	attP40; attP2	Sample#2742920467802226786	f			GMR_SS01547	GMR_SS01547-20191122_48_F2	Drosophila melanogaster	20x	w; VT049363-p65ADZp in attP40/CyO::Tb-RFP; VT057283-ZpGdbd in attP2
SS01547	20191122_48_G6	A01	Fri Dec 06 15:13:20 EST 2019	204155	ditp_ss_screen_review	UAS_Chrimson_Venus_X_0070	Card	attP40; attP2	Sample#2742920469391868002	m			GMR_SS01547	GMR_SS01547-20191122_48_G6	Drosophila melanogaster	20x	w; VT049363-p65ADZp in attP40/CyO::Tb-RFP; VT057283-ZpGdbd in attP2
SS01550	20191122_48_D6	A01	Fri Dec 06 15:13:20 EST 2019	204151	ditp_ss_screen_review	UAS_Chrimson_Venus_X_0070	Card	attP40; attP2	Sample#2742920466380357730	m			GMR_SS01550	GMR_SS01550-20191122_48_D6	Drosophila melanogaster	20x	w; VT037583-p65ADZp in attP40; VT025598-ZpGdbd in attP2
SS01550	20191122_48_E5	A01	Fri Dec 06 15:13:20 EST 2019	204151	ditp_ss_screen_review	UAS_Chrimson_Venus_X_0070	Card	attP40; attP2	Sample#2742920467168886882	f			GMR_SS01550	GMR_SS01550-20191122_48_E5	Drosophila melanogaster	20x	w; VT037583-p65ADZp in attP40; VT025598-ZpGdbd in attP2
SS01551	20210312_42_G5	A01	Fri Apr 09 17:53:30 EDT 2021	222120	ditp_ss_screen_review	UAS_Chrimson_Venus_X_0070	Card	attP40; attP2	Sample#2920515728127819874	f	Descending Interneuron	Shigehiro Namiki	GMR_SS01551	GMR_SS01551-20210312_42_G5	Drosophila melanogaster	20x	w; VT059450-p65ADZp in attP40; VT037825-ZpGdbd in attP2
SS01551	20210312_42_I5	A01	Fri Apr 09 17:53:30 EDT 2021	222120	ditp_ss_screen_review	UAS_Chrimson_Venus_X_0070	Card	attP40; attP2	Sample#2920515730061394018	m	Descending Interneuron	Shigehiro Namiki	GMR_SS01551	GMR_SS01551-20210312_42_I5	Drosophila melanogaster	20x	w; VT059450-p65ADZp in attP40; VT037825-ZpGdbd in attP2
SS01553	20191122_48_A5	A01	Fri Dec 06 15:13:19 EST 2019	204135	ditp_ss_screen_review	UAS_Chrimson_Venus_X_0070	Card	attP40; attP2	Sample#2742920463167520866	f			GMR_SS01553	GMR_SS01553-20191122_48_A5	Drosophila melanogaster	20x	w; VT003476-p65ADZp in attP40; 89A03-ZpGdbd in attP2
SS01553	20191122_48_C3	A01	Fri Dec 06 15:13:19 EST 2019	204135	ditp_ss_screen_review	UAS_Chrimson_Venus_X_0070	Card	attP40; attP2	Sample#2742920465033986146	m			GMR_SS01553	GMR_SS01553-20191122_48_C3	Drosophila melanogaster	20x	w; VT003476-p65ADZp in attP40; 89A03-ZpGdbd in attP2
SS01554	20191122_48_F4	A01	Fri Dec 06 15:13:20 EST 2019	204132	ditp_ss_screen_review	UAS_Chrimson_Venus_X_0070	Card	attP40; attP2	Sample#2742920468259405922	f			GMR_SS01554	GMR_SS01554-20191122_48_F4	Drosophila melanogaster	20x	w; VT063736-p65ADZp in attP40; VT017647-ZpGdbd in attP2/TM6B
SS01554	20191122_48_H2	A01	Fri Dec 06 15:13:20 EST 2019	204132	ditp_ss_screen_review	UAS_Chrimson_Venus_X_0070	Card	attP40; attP2	Sample#2742920469769355362	m			GMR_SS01554	GMR_SS01554-20191122_48_H2	Drosophila melanogaster	20x	w; VT063736-p65ADZp in attP40; VT017647-ZpGdbd in attP2/TM6B
SS01555	20210312_42_H2	A01	Fri Apr 09 17:53:30 EDT 2021	222123	ditp_ss_screen_review	UAS_Chrimson_Venus_X_0070	Card	attP40; attP2	Sample#2920515728664690786	f	Descending Interneuron	Shigehiro Namiki	GMR_SS01555	GMR_SS01555-20210312_42_H2	Drosophila melanogaster	20x	w; 10A07-p65ADZp in attP40; VT033947-ZpGdbd in attP2
SS01555	20210312_42_J2	A01	Fri Apr 09 17:53:30 EDT 2021	222123	ditp_ss_screen_review	UAS_Chrimson_Venus_X_0070	Card	attP40; attP2	Sample#2920515730594070626	m	Descending Interneuron	Shigehiro Namiki	GMR_SS01555	GMR_SS01555-20210312_42_J2	Drosophila melanogaster	20x	w; 10A07-p65ADZp in attP40; VT033947-ZpGdbd in attP2
SS01556	20191122_48_F1	A01	Fri Dec 06 15:13:20 EST 2019	204154	ditp_ss_screen_review	UAS_Chrimson_Venus_X_0070	Card	attP40; attP2	Sample#2742920467592511586	f			GMR_SS01556	GMR_SS01556-20191122_48_F1	Drosophila melanogaster	20x	w; 11E07-p65ADZp in attP40/CyO::Tb-RFP; 77F05-ZpGdbd in attP2/TM6B
SS01556	20191122_48_G5	A01	Fri Dec 06 15:13:20 EST 2019	204154	ditp_ss_screen_review	UAS_Chrimson_Venus_X_0070	Card	attP40; attP2	Sample#2742920469207318626	m			GMR_SS01556	GMR_SS01556-20191122_48_G5	Drosophila melanogaster	20x	w; 11E07-p65ADZp in attP40/CyO::Tb-RFP; 77F05-ZpGdbd in attP2/TM6B
SS01557	20200717_46_E6	A01	Wed Aug 12 17:05:35 EDT 2020	212597	ditp_ss_screen_review	UAS_Chrimson_Venus_X_0070	Card	attP40; attP2	Sample#2833530584158961762	f			GMR_SS01557	GMR_SS01557-20200717_46_E6	Drosophila melanogaster	20x	w; 13D04-p65ADZp in attP40/CyO::Tb-RFP; 65D05-ZpGdbd in attP2
SS01557	20200717_46_G4	A01	Wed Aug 12 17:05:35 EDT 2020	212597	ditp_ss_screen_review	UAS_Chrimson_Venus_X_0070	Card	attP40; attP2	Sample#2833530585039765602	m			GMR_SS01557	GMR_SS01557-20200717_46_G4	Drosophila melanogaster	20x	w; 13D04-p65ADZp in attP40/CyO::Tb-RFP; 65D05-ZpGdbd in attP2
SS01558	20200717_43_H4	A01	Wed Aug 12 08:30:35 EDT 2020	212462	ditp_ss_screen_review	UAS_Chrimson_Venus_X_0070	Card	attP40; attP2	Sample#2833400978475057250	f			GMR_SS01558	GMR_SS01558-20200717_43_H4	Drosophila melanogaster	20x	w; 27E07-p65ADZp in attP40; VT014958-ZpGdbd in attP2
SS01558	20200717_44_H3	A01	Wed Aug 12 09:09:06 EDT 2020	212462	ditp_ss_screen_review	UAS_Chrimson_Venus_X_0070	Card	attP40; attP2	Sample#2833410673298374754	m			GMR_SS01558	GMR_SS01558-20200717_44_H3	Drosophila melanogaster	20x	w; 27E07-p65ADZp in attP40; VT014958-ZpGdbd in attP2
SS01560	20191122_48_G2	A01	Thu Dec 12 13:07:48 EST 2019	204150	ditp_ss_screen_review	UAS_Chrimson_Venus_X_0070	Card	attP40; attP2	Sample#2745063201379975266	f			GMR_SS01560	GMR_SS01560-20191122_48_G2	Drosophila melanogaster	20x	w; 31H10-p65ADZp in attP40/CyO::Tb-RFP; VT040698-ZpGdbd in attP2
SS01560	20191122_48_H6	A01	Tue Dec 17 13:34:36 EST 2019	204150	ditp_ss_screen_review	UAS_Chrimson_Venus_X_0070	Card	attP40; attP2	Sample#2746881888940458082	m			GMR_SS01560	GMR_SS01560-20191122_48_H6	Drosophila melanogaster	20x	w; 31H10-p65ADZp in attP40/CyO::Tb-RFP; VT040698-ZpGdbd in attP2
SS01562	20230728_46_D5	A01	Wed Aug 23 13:23:36 EDT 2023	259147	ditp_ss_screen_review	UAS_Chrimson_Venus_X_0070	Card	attP40; attP2	Sample#3234275696691904671	f	DI	DI	GMR_SS01562	GMR_SS01562-20230728_46_D5	Drosophila melanogaster	20x	w; 42B02-p65ADZp in attP40/CyO,Tb; VT039465-ZpGDBD in attP2
SS01562	20230728_46_G6	A01	Wed Aug 23 13:23:36 EDT 2023	259147	ditp_ss_screen_review	UAS_Chrimson_Venus_X_0070	Card	attP40; attP2	Sample#3234275699174932639	m	DI	DI	GMR_SS01562	GMR_SS01562-20230728_46_G6	Drosophila melanogaster	20x	w; 42B02-p65ADZp in attP40/CyO,Tb; VT039465-ZpGDBD in attP2
SS01563	20230728_46_D6	A01	Wed Aug 23 13:23:36 EDT 2023	259148	ditp_ss_screen_review	UAS_Chrimson_Venus_X_0070	Card	attP40; attP2	Sample#3234275696842899615	f	DI	DI	GMR_SS01563	GMR_SS01563-20230728_46_D6	Drosophila melanogaster	20x	w; 42B02-p65ADZp in attP40/CyO,Tb; VT058697-ZpGDBD in attP2
SS01563	20230728_46_H1	A01	Wed Aug 23 13:23:36 EDT 2023	259148	ditp_ss_screen_review	UAS_Chrimson_Venus_X_0070	Card	attP40; attP2	Sample#3234275699296567455	m	DI	DI	GMR_SS01563	GMR_SS01563-20230728_46_H1	Drosophila melanogaster	20x	w; 42B02-p65ADZp in attP40/CyO,Tb; VT058697-ZpGDBD in attP2
SS01564	20191122_48_E1	A01	Fri Dec 06 15:13:20 EST 2019	204141	ditp_ss_screen_review	UAS_Chrimson_Venus_X_0070	Card	attP40; attP2	Sample#2742920466573295714	m			GMR_SS01564	GMR_SS01564-20191122_48_E1	Drosophila melanogaster	20x	w; 44A07-p65ADZp in attP40/CyO::Tb-RFP; VT045150-ZpGdbd in attP2
SS01564	20191122_48_E6	A01	Fri Dec 06 15:13:20 EST 2019	204141	ditp_ss_screen_review	UAS_Chrimson_Venus_X_0070	Card	attP40; attP2	Sample#2742920467378602082	f			GMR_SS01564	GMR_SS01564-20191122_48_E6	Drosophila melanogaster	20x	w; 44A07-p65ADZp in attP40/CyO::Tb-RFP; VT045150-ZpGdbd in attP2
SS01565	20191122_48_A4	A01	Fri Dec 06 15:13:19 EST 2019	204134	ditp_ss_screen_review	UAS_Chrimson_Venus_X_0070	Card	attP40; attP2	Sample#2742920462978777186	f			GMR_SS01565	GMR_SS01565-20191122_48_A4	Drosophila melanogaster	20x	w; 60B11-p65ADZp in attP40; 83B04-ZpGdbd in attP2
SS01565	20191122_48_C2	A01	Fri Dec 06 15:13:19 EST 2019	204134	ditp_ss_screen_review	UAS_Chrimson_Venus_X_0070	Card	attP40; attP2	Sample#2742920464849436770	m			GMR_SS01565	GMR_SS01565-20191122_48_C2	Drosophila melanogaster	20x	w; 60B11-p65ADZp in attP40; 83B04-ZpGdbd in attP2
SS01567	20200710_45_A2	A01	Tue Aug 11 19:54:07 EDT 2020	212425	ditp_ss_screen_review	UAS_Chrimson_Venus_X_0070	Card	attP40; attP2	Sample#2833210607145058402	f			GMR_SS01567	GMR_SS01567-20200710_45_A2	Drosophila melanogaster	20x	w; 88F03-p65ADZp in attP40/CyO::Tb-RFP; VT009857-ZpGdbd in attP2
SS01567	20200710_45_D1	A01	Tue Aug 11 19:54:08 EDT 2020	212425	ditp_ss_screen_review	UAS_Chrimson_Venus_X_0070	Card	attP40; attP2	Sample#2833210613440708706	m			GMR_SS01567	GMR_SS01567-20200710_45_D1	Drosophila melanogaster	20x	w; 88F03-p65ADZp in attP40/CyO::Tb-RFP; VT009857-ZpGdbd in attP2
SS01568	20210312_42_G2	A01	Fri Apr 09 17:53:30 EDT 2021	222117	ditp_ss_screen_review	UAS_Chrimson_Venus_X_0070	Card	attP40; attP2	Sample#2920515727590948962	f	Descending Interneuron	Shigehiro Namiki	GMR_SS01568	GMR_SS01568-20210312_42_G2	Drosophila melanogaster	20x	w; 91C05-p65ADZp in attP40/CyO::Tb-RFP; 10A12-ZpGdbd in attP2/TM6B
SS01568	20210312_42_I2	A01	Fri Apr 09 17:53:30 EDT 2021	222117	ditp_ss_screen_review	UAS_Chrimson_Venus_X_0070	Card	attP40; attP2	Sample#2920515729537106018	m	Descending Interneuron	Shigehiro Namiki	GMR_SS01568	GMR_SS01568-20210312_42_I2	Drosophila melanogaster	20x	w; 91C05-p65ADZp in attP40/CyO::Tb-RFP; 10A12-ZpGdbd in attP2/TM6B
SS01570	20191127_42_C5	A01	Tue Dec 17 16:18:16 EST 2019	204591	ditp_ss_screen_review	UAS_Chrimson_Venus_X_0070	Card	attP40; attP2	Sample#2746923073142784098	m			GMR_SS01570	GMR_SS01570-20191127_42_C5	Drosophila melanogaster	20x	w; VT012639-p65ADZp in attP40; VT034795-ZpGdbd in attP2
SS01570	20191127_42_F5	A01	Tue Dec 17 16:18:16 EST 2019	204591	ditp_ss_screen_review	UAS_Chrimson_Venus_X_0070	Card	attP40; attP2	Sample#2746923076733108322	f			GMR_SS01570	GMR_SS01570-20191127_42_F5	Drosophila melanogaster	20x	w; VT012639-p65ADZp in attP40; VT034795-ZpGdbd in attP2
SS01571	20191127_42_B1	A01	Tue Dec 17 16:18:15 EST 2019	204588	ditp_ss_screen_review	UAS_Chrimson_Venus_X_0070	Card	attP40; attP2	Sample#2746923071137906786	m			GMR_SS01571	GMR_SS01571-20191127_42_B1	Drosophila melanogaster	20x	w; VT028606-p65ADZp in attP40; VT008675-ZpGdbd in attP2
SS01571	20191127_42_E1	A01	Tue Dec 17 16:18:16 EST 2019	204588	ditp_ss_screen_review	UAS_Chrimson_Venus_X_0070	Card	attP40; attP2	Sample#2746923074745008226	f			GMR_SS01571	GMR_SS01571-20191127_42_E1	Drosophila melanogaster	20x	w; VT028606-p65ADZp in attP40; VT008675-ZpGdbd in attP2
SS01574	20210521_44_B2	A01	Fri Jun 04 11:24:06 EDT 2021	227738	ditp_ss_screen_review	UAS_Chrimson_Venus_X_0070	Card	attP40; attP2	Sample#2940711452501082210	f	Descending Interneuron	Shigehiro Namiki	GMR_SS01574	GMR_SS01574-20210521_44_B2	Drosophila melanogaster	20x	w; VT045148-p65ADZp in attP40; VT045150-ZpGdbd in attP2/TM6B
SS01574	20210521_44_G2	A01	Fri Jun 04 11:24:06 EDT 2021	227738	ditp_ss_screen_review	UAS_Chrimson_Venus_X_0070	Card	attP40; attP2	Sample#2940711452807266402	m	Descending Interneuron	Shigehiro Namiki	GMR_SS01574	GMR_SS01574-20210521_44_G2	Drosophila melanogaster	20x	w; VT045148-p65ADZp in attP40; VT045150-ZpGdbd in attP2/TM6B
SS01575	20191127_42_C3	A01	Tue Dec 17 16:18:15 EST 2019	204589	ditp_ss_screen_review	UAS_Chrimson_Venus_X_0070	Card	attP40; attP2	Sample#2746923072744325218	m			GMR_SS01575	GMR_SS01575-20191127_42_C3	Drosophila melanogaster	20x	w; VT001615-p65ADZp in attP40; VT026017-ZpGdbd in attP2
SS01575	20191127_42_F3	A01	Tue Dec 17 16:18:16 EST 2019	204589	ditp_ss_screen_review	UAS_Chrimson_Venus_X_0070	Card	attP40; attP2	Sample#2746923076338843746	f			GMR_SS01575	GMR_SS01575-20191127_42_F3	Drosophila melanogaster	20x	w; VT001615-p65ADZp in attP40; VT026017-ZpGdbd in attP2
SS01576	20191127_42_C4	A01	Tue Dec 17 16:18:15 EST 2019	204590	ditp_ss_screen_review	UAS_Chrimson_Venus_X_0070	Card	attP40; attP2	Sample#2746923072941457506	m			GMR_SS01576	GMR_SS01576-20191127_42_C4	Drosophila melanogaster	20x	w; VT001615-p65ADZp in attP40; 70C05-ZpGdbd in attP2
SS01576	20191127_42_F4	A01	Tue Dec 17 16:18:16 EST 2019	204590	ditp_ss_screen_review	UAS_Chrimson_Venus_X_0070	Card	attP40; attP2	Sample#2746923076540170338	f			GMR_SS01576	GMR_SS01576-20191127_42_F4	Drosophila melanogaster	20x	w; VT001615-p65ADZp in attP40; 70C05-ZpGdbd in attP2
SS01577	20230728_46_E1	A01	Wed Aug 23 13:23:36 EDT 2023	259149	ditp_ss_screen_review	UAS_Chrimson_Venus_X_0070	Card	attP40; attP2	Sample#3234275696977117343	f	DI	DI	GMR_SS01577	GMR_SS01577-20230728_46_E1	Drosophila melanogaster	20x	w; VT039465-p65ADZ in attP40/CyO,Tb; VT011148-ZpGDBD in attP2
SS01577	20230728_46_H2	A01	Wed Aug 23 13:23:36 EDT 2023	259149	ditp_ss_screen_review	UAS_Chrimson_Venus_X_0070	Card	attP40; attP2	Sample#3234275699422396575	m	DI	DI	GMR_SS01577	GMR_SS01577-20230728_46_H2	Drosophila melanogaster	20x	w; VT039465-p65ADZ in attP40/CyO,Tb; VT011148-ZpGDBD in attP2
SS01578	20230728_46_E2	A01	Wed Aug 23 13:23:36 EDT 2023	259150	ditp_ss_screen_review	UAS_Chrimson_Venus_X_0070	Card	attP40; attP2	Sample#3234275697136500895	f	DI	DI	BJD_SS01578	BJD_SS01578-20230728_46_E2	Drosophila melanogaster	20x	w; VT039465-p65ADZ in attP40; VT061933-ZpGDBD in attP2
SS01578	20230728_46_F6	A01	Wed Aug 23 13:23:36 EDT 2023	259150	ditp_ss_screen_review	UAS_Chrimson_Venus_X_0070	Card	attP40; attP2	Sample#3234275698415763615	m	DI	DI	BJD_SS01578	BJD_SS01578-20230728_46_F6	Drosophila melanogaster	20x	w; VT039465-p65ADZ in attP40; VT061933-ZpGDBD in attP2
SS01580	20191127_42_B5	A01	Tue Dec 17 16:18:15 EST 2019	204584	ditp_ss_screen_review	UAS_Chrimson_Venus_X_0070	Card	attP40; attP2	Sample#2746923071947407458	m			GMR_SS01580	GMR_SS01580-20191127_42_B5	Drosophila melanogaster	20x	w; VT031084-p65ADZp in attP40; 48E11-ZpGdbd in attP2
SS01580	20191127_42_E5	A01	Tue Dec 17 16:18:16 EST 2019	204584	ditp_ss_screen_review	UAS_Chrimson_Venus_X_0070	Card	attP40; attP2	Sample#2746923075546120290	f			GMR_SS01580	GMR_SS01580-20191127_42_E5	Drosophila melanogaster	20x	w; VT031084-p65ADZp in attP40; 48E11-ZpGdbd in attP2
SS01581	20191127_42_B2	A01	Tue Dec 17 16:18:15 EST 2019	204587	ditp_ss_screen_review	UAS_Chrimson_Venus_X_0070	Card	attP40; attP2	Sample#2746923071339233378	m			GMR_SS01581	GMR_SS01581-20191127_42_B2	Drosophila melanogaster	20x	w; VT008142-p65ADZp in attP40; VT046808-ZpGdbd in attP2
SS01581	20191127_42_E2	A01	Tue Dec 17 16:18:16 EST 2019	204587	ditp_ss_screen_review	UAS_Chrimson_Venus_X_0070	Card	attP40; attP2	Sample#2746923074942140514	f			GMR_SS01581	GMR_SS01581-20191127_42_E2	Drosophila melanogaster	20x	w; VT008142-p65ADZp in attP40; VT046808-ZpGdbd in attP2
SS01582	20191127_42_A6	A01	Tue Dec 17 16:18:15 EST 2019	204593	ditp_ss_screen_review	UAS_Chrimson_Venus_X_0070	Card	attP40; attP2	Sample#2746923070923997282	m			GMR_SS01582	GMR_SS01582-20191127_42_A6	Drosophila melanogaster	20x	w; VT032900-p65ADZp in attP40; VT043145-ZpGdbd in attP2
SS01582	20191127_42_D6	A01	Tue Dec 17 16:18:16 EST 2019	204593	ditp_ss_screen_review	UAS_Chrimson_Venus_X_0070	Card	attP40; attP2	Sample#2746923074543681634	f			GMR_SS01582	GMR_SS01582-20191127_42_D6	Drosophila melanogaster	20x	w; VT032900-p65ADZp in attP40; VT043145-ZpGdbd in attP2
SS01583	20220128_46_I3	A01	Thu Feb 10 16:15:08 EST 2022	243576	ditp_ss_screen_review	UAS_Chrimson_Venus_X_0070	Card	attP40; attP2	Sample#3031759150896906338	f	Descending Interneuron	Shigehiro Namiki	GMR_SS01583	GMR_SS01583-20220128_46_I3	Drosophila melanogaster	20x	w; VT004985-p65ADZp in attP40/CyO::Tb-RFP; VT017928-ZpGdbd in attP2/TM6B
SS01583	20220128_46_I6	A01	Thu Feb 10 16:15:09 EST 2022	243576	ditp_ss_screen_review	UAS_Chrimson_Venus_X_0070	Card	attP40; attP2	Sample#3031759151236644962	m	Descending Interneuron	Shigehiro Namiki	GMR_SS01583	GMR_SS01583-20220128_46_I6	Drosophila melanogaster	20x	w; VT004985-p65ADZp in attP40/CyO::Tb-RFP; VT017928-ZpGdbd in attP2/TM6B
SS01584	20210219_41_E1	A01	Wed Mar 10 13:11:20 EST 2021	219886	ditp_ss_screen_review	UAS_Chrimson_Venus_X_0070	Card	attP40; attP2	Sample#2909588185665241186	f	Descending Interneuron	Shigehiro Namiki	GMR_SS01584	GMR_SS01584-20210219_41_E1	Drosophila melanogaster	20x	w; VT034258-p65ADZp in attP40; 32B03-ZpGdbd in attP2
SS01584	20210219_41_J1	A01	Wed Mar 10 13:11:21 EST 2021	219886	ditp_ss_screen_review	UAS_Chrimson_Venus_X_0070	Card	attP40; attP2	Sample#2909588189628858466	m	Descending Interneuron	Shigehiro Namiki	GMR_SS01584	GMR_SS01584-20210219_41_J1	Drosophila melanogaster	20x	w; VT034258-p65ADZp in attP40; 32B03-ZpGdbd in attP2
SS01585	20220114_45_E5	A01	Wed Jan 26 14:27:06 EST 2022	242811	ditp_ss_screen_review	UAS_Chrimson_Venus_X_0070	Card	attP40; attP2	Sample#3026296144293527650	f	Descending Interneuron	Shigehiro Namiki	GMR_SS01585	GMR_SS01585-20220114_45_E5	Drosophila melanogaster	20x	w; 10A07-p65ADZp in attP40; 24D07-ZpGdbd in attP2/TM6B
SS01585	20220114_45_F2	A01	Wed Jan 26 14:27:06 EST 2022	242811	ditp_ss_screen_review	UAS_Chrimson_Venus_X_0070	Card	attP40; attP2	Sample#3026296144612294754	m	Descending Interneuron	Shigehiro Namiki	GMR_SS01585	GMR_SS01585-20220114_45_F2	Drosophila melanogaster	20x	w; 10A07-p65ADZp in attP40; 24D07-ZpGdbd in attP2/TM6B
SS01587	20191127_42_A5	A01	Tue Dec 17 16:18:15 EST 2019	204594	ditp_ss_screen_review	UAS_Chrimson_Venus_X_0070	Card	attP40; attP2	Sample#2746923070710087778	m			GMR_SS01587	GMR_SS01587-20191127_42_A5	Drosophila melanogaster	20x	w; 11H10-p65ADZp in attP40/CyO::Tb-RFP; VT033947-ZpGdbd in attP2
SS01587	20191127_42_D5	A01	Tue Dec 17 16:18:16 EST 2019	204594	ditp_ss_screen_review	UAS_Chrimson_Venus_X_0070	Card	attP40; attP2	Sample#2746923074342355042	f			GMR_SS01587	GMR_SS01587-20191127_42_D5	Drosophila melanogaster	20x	w; 11H10-p65ADZp in attP40/CyO::Tb-RFP; VT033947-ZpGdbd in attP2
SS01589	20191127_42_A4	A01	Tue Dec 17 16:18:15 EST 2019	204595	ditp_ss_screen_review	UAS_Chrimson_Venus_X_0070	Card	attP40; attP2	Sample#2746923070512955490	m			GMR_SS01589	GMR_SS01589-20191127_42_A4	Drosophila melanogaster	20x	w; 20C03-p65ADZp in attP40/CyO::Tb-RFP; 23C07-ZpGdbd in attP2/TM6B
SS01589	20191127_42_D4	A01	Tue Dec 17 16:18:16 EST 2019	204595	ditp_ss_screen_review	UAS_Chrimson_Venus_X_0070	Card	attP40; attP2	Sample#2746923074141028450	f			GMR_SS01589	GMR_SS01589-20191127_42_D4	Drosophila melanogaster	20x	w; 20C03-p65ADZp in attP40/CyO::Tb-RFP; 23C07-ZpGdbd in attP2/TM6B
SS01590	20191127_42_C6	A01	Tue Dec 17 16:18:16 EST 2019	204592	ditp_ss_screen_review	UAS_Chrimson_Venus_X_0070	Card	attP40; attP2	Sample#2746923073339916386	m			GMR_SS01590	GMR_SS01590-20191127_42_C6	Drosophila melanogaster	20x	w; 20C03-p65ADZp in attP40/CyO::Tb-RFP; 31B08-ZpGdbd in attP2
SS01590	20191127_42_F6	A01	Tue Dec 17 16:18:16 EST 2019	204592	ditp_ss_screen_review	UAS_Chrimson_Venus_X_0070	Card	attP40; attP2	Sample#2746923076930240610	f			GMR_SS01590	GMR_SS01590-20191127_42_F6	Drosophila melanogaster	20x	w; 20C03-p65ADZp in attP40/CyO::Tb-RFP; 31B08-ZpGdbd in attP2
SS01592	20210312_42_H4	A01	Fri Apr 09 17:53:30 EDT 2021	222125	ditp_ss_screen_review	UAS_Chrimson_Venus_X_0070	Card	attP40; attP2	Sample#2920515729012818018	f	Descending Interneuron	Shigehiro Namiki	GMR_SS01592	GMR_SS01592-20210312_42_H4	Drosophila melanogaster	20x	w; 26E02-p65ADZp in attP40/CyO::Tb-RFP; 81D05-ZpGdbd in attP2
SS01592	20210312_42_J4	A01	Fri Apr 09 17:53:30 EDT 2021	222125	ditp_ss_screen_review	UAS_Chrimson_Venus_X_0070	Card	attP40; attP2	Sample#2920515730942197858	m	Descending Interneuron	Shigehiro Namiki	GMR_SS01592	GMR_SS01592-20210312_42_J4	Drosophila melanogaster	20x	w; 26E02-p65ADZp in attP40/CyO::Tb-RFP; 81D05-ZpGdbd in attP2
SS01594	20220114_45_B6	A01	Wed Jan 26 14:27:06 EST 2022	242813	ditp_ss_screen_review	UAS_Chrimson_Venus_X_0070	Card	attP40; attP2	Sample#3026296143345614946	f	Descending Interneuron	Shigehiro Namiki	GMR_SS01594	GMR_SS01594-20220114_45_B6	Drosophila melanogaster	20x	w; 29F12-p65ADZp in attP40; 24A03-ZpGdbd in attP2
SS01594	20220114_45_C5	A01	Wed Jan 26 14:27:06 EST 2022	242813	ditp_ss_screen_review	UAS_Chrimson_Venus_X_0070	Card	attP40; attP2	Sample#3026296143765045346	m	Descending Interneuron	Shigehiro Namiki	GMR_SS01594	GMR_SS01594-20220114_45_C5	Drosophila melanogaster	20x	w; 29F12-p65ADZp in attP40; 24A03-ZpGdbd in attP2
SS01595	20210312_42_G3	A01	Fri Apr 09 17:53:30 EDT 2021	222118	ditp_ss_screen_review	UAS_Chrimson_Venus_X_0070	Card	attP40; attP2	Sample#2920515727779692642	f	Descending Interneuron	Shigehiro Namiki	GMR_SS01595	GMR_SS01595-20210312_42_G3	Drosophila melanogaster	20x	w; 29F12-p65ADZp in attP40; 31B08-ZpGdbd in attP2
SS01595	20210312_42_I3	A01	Fri Apr 09 17:53:30 EDT 2021	222118	ditp_ss_screen_review	UAS_Chrimson_Venus_X_0070	Card	attP40; attP2	Sample#2920515729713266786	m	Descending Interneuron	Shigehiro Namiki	GMR_SS01595	GMR_SS01595-20210312_42_I3	Drosophila melanogaster	20x	w; 29F12-p65ADZp in attP40; 31B08-ZpGdbd in attP2
SS01596	20210312_42_G4	A01	Fri Apr 09 17:53:30 EDT 2021	222119	ditp_ss_screen_review	UAS_Chrimson_Venus_X_0070	Card	attP40; attP2	Sample#2920515727955853410	f	Descending Interneuron	Shigehiro Namiki	GMR_SS01596	GMR_SS01596-20210312_42_G4	Drosophila melanogaster	20x	w; 29F12-p65ADZp in attP40; 37G07-ZpGdbd in attP2
SS01596	20210312_42_I4	A01	Fri Apr 09 17:53:30 EDT 2021	222119	ditp_ss_screen_review	UAS_Chrimson_Venus_X_0070	Card	attP40; attP2	Sample#2920515729885233250	m	Descending Interneuron	Shigehiro Namiki	GMR_SS01596	GMR_SS01596-20210312_42_I4	Drosophila melanogaster	20x	w; 29F12-p65ADZp in attP40; 37G07-ZpGdbd in attP2
SS01597	20191127_42_A2	A01	Tue Dec 17 16:18:15 EST 2019	204604	ditp_ss_screen_review	UAS_Chrimson_Venus_X_0070	Card	attP40; attP2	Sample#2746923070110302306	m			GMR_SS01597	GMR_SS01597-20191127_42_A2	Drosophila melanogaster	20x	w; 42B02-p65ADZp in attP40; VT026005-ZpGdbd in attP2
SS01597	20191127_42_D2	A01	Tue Dec 17 16:18:16 EST 2019	204604	ditp_ss_screen_review	UAS_Chrimson_Venus_X_0070	Card	attP40; attP2	Sample#2746923073742569570	f			GMR_SS01597	GMR_SS01597-20191127_42_D2	Drosophila melanogaster	20x	w; 42B02-p65ADZp in attP40; VT026005-ZpGdbd in attP2
SS01598	20210312_42_H1	A01	Fri Apr 09 17:53:30 EDT 2021	222122	ditp_ss_screen_review	UAS_Chrimson_Venus_X_0070	Card	attP40; attP2	Sample#2920515728480141410	f	Descending Interneuron	Shigehiro Namiki	GMR_SS01598	GMR_SS01598-20210312_42_H1	Drosophila melanogaster	20x	w; 42B02-p65ADZp in attP40; VT015782-ZpGdbd in attP2/TM6B
SS01598	20210312_42_J1	A01	Fri Apr 09 17:53:30 EDT 2021	222122	ditp_ss_screen_review	UAS_Chrimson_Venus_X_0070	Card	attP40; attP2	Sample#2920515730409521250	m	Descending Interneuron	Shigehiro Namiki	GMR_SS01598	GMR_SS01598-20210312_42_J1	Drosophila melanogaster	20x	w; 42B02-p65ADZp in attP40; VT015782-ZpGdbd in attP2/TM6B
SS01599	20210312_42_G6	A01	Fri Apr 09 17:53:30 EDT 2021	222121	ditp_ss_screen_review	UAS_Chrimson_Venus_X_0070	Card	attP40; attP2	Sample#2920515728303980642	f	Descending Interneuron	Shigehiro Namiki	GMR_SS01599	GMR_SS01599-20210312_42_G6	Drosophila melanogaster	20x	w; 47D05-p65ADZp in attP40; 39H12-ZpGdbd in attP2
SS01599	20210312_42_I6	A01	Fri Apr 09 17:53:30 EDT 2021	222121	ditp_ss_screen_review	UAS_Chrimson_Venus_X_0070	Card	attP40; attP2	Sample#2920515730237554786	m	Descending Interneuron	Shigehiro Namiki	GMR_SS01599	GMR_SS01599-20210312_42_I6	Drosophila melanogaster	20x	w; 47D05-p65ADZp in attP40; 39H12-ZpGdbd in attP2
SS01600	20191127_42_B4	A01	Tue Dec 17 16:18:15 EST 2019	204585	ditp_ss_screen_review	UAS_Chrimson_Venus_X_0070	Card	attP40; attP2	Sample#2746923071746080866	m			GMR_SS01600	GMR_SS01600-20191127_42_B4	Drosophila melanogaster	20x	w; 59B10-p65ADZp in attP40; 21F05-ZpGdbd in attP2
SS01600	20191127_42_E4	A01	Tue Dec 17 16:18:16 EST 2019	204585	ditp_ss_screen_review	UAS_Chrimson_Venus_X_0070	Card	attP40; attP2	Sample#2746923075344793698	f			GMR_SS01600	GMR_SS01600-20191127_42_E4	Drosophila melanogaster	20x	w; 59B10-p65ADZp in attP40; 21F05-ZpGdbd in attP2
SS01601	20210312_42_H3	A01	Fri Apr 09 17:53:30 EDT 2021	222124	ditp_ss_screen_review	UAS_Chrimson_Venus_X_0070	Card	attP40; attP2	Sample#2920515728840851554	f	Descending Interneuron	Shigehiro Namiki	GMR_SS01601	GMR_SS01601-20210312_42_H3	Drosophila melanogaster	20x	w; 59B10-p65ADZp in attP40; 21H11-ZpGdbd in attP2
SS01601	20210312_42_J3	A01	Fri Apr 09 17:53:30 EDT 2021	222124	ditp_ss_screen_review	UAS_Chrimson_Venus_X_0070	Card	attP40; attP2	Sample#2920515730766037090	m	Descending Interneuron	Shigehiro Namiki	GMR_SS01601	GMR_SS01601-20210312_42_J3	Drosophila melanogaster	20x	w; 59B10-p65ADZp in attP40; 21H11-ZpGdbd in attP2
SS01602	20191127_42_C1	A01	Tue Dec 17 16:18:15 EST 2019	204582	ditp_ss_screen_review	UAS_Chrimson_Venus_X_0070	Card	attP40; attP2	Sample#2746923072345866338	m			GMR_SS01602	GMR_SS01602-20191127_42_C1	Drosophila melanogaster	20x	w; 64B03-p65ADZp in attP40; 29G08-ZpGdbd in attP2/TM6B
SS01602	20191127_42_F1	A01	Tue Dec 17 16:18:16 EST 2019	204582	ditp_ss_screen_review	UAS_Chrimson_Venus_X_0070	Card	attP40; attP2	Sample#2746923075944579170	f			GMR_SS01602	GMR_SS01602-20191127_42_F1	Drosophila melanogaster	20x	w; 64B03-p65ADZp in attP40; 29G08-ZpGdbd in attP2/TM6B
SS01603	20210521_44_C6	A01	Fri Jun 04 12:36:36 EDT 2021	227745	ditp_ss_screen_review	UAS_Chrimson_Venus_X_0070	Card	attP40; attP2	Sample#2940729700479139938	f	Descending Interneuron	Shigehiro Namiki	GMR_SS01603	GMR_SS01603-20210521_44_C6	Drosophila melanogaster	20x	w; 72H09-p65ADZp in attP40; VT037825-ZpGdbd in attP2
SS01603	20210521_44_H6	A01	Fri Jun 04 12:36:37 EDT 2021	227745	ditp_ss_screen_review	UAS_Chrimson_Venus_X_0070	Card	attP40; attP2	Sample#2940729702223970402	m	Descending Interneuron	Shigehiro Namiki	GMR_SS01603	GMR_SS01603-20210521_44_H6	Drosophila melanogaster	20x	w; 72H09-p65ADZp in attP40; VT037825-ZpGdbd in attP2
SS01605	20210312_42_H6	A01	Fri Apr 09 17:53:30 EDT 2021	222127	ditp_ss_screen_review	UAS_Chrimson_Venus_X_0070	Card	attP40; attP2	Sample#2920515729360945250	f	Descending Interneuron	Shigehiro Namiki	GMR_SS01605	GMR_SS01605-20210312_42_H6	Drosophila melanogaster	20x	w; 77H03-p65ADZp in attP40; 74B04-ZpGdbd in attP2/TM6B
SS01605	20210312_42_J6	A01	Fri Apr 09 17:53:30 EDT 2021	222127	ditp_ss_screen_review	UAS_Chrimson_Venus_X_0070	Card	attP40; attP2	Sample#2920515731286130786	m	Descending Interneuron	Shigehiro Namiki	GMR_SS01605	GMR_SS01605-20210312_42_J6	Drosophila melanogaster	20x	w; 77H03-p65ADZp in attP40; 74B04-ZpGdbd in attP2/TM6B
SS01828	20230113_42_C6	A01	Mon Jan 30 14:00:39 EST 2023	253394	asoy_ss_screen_review	UAS_Chrimson_Venus_X_0070	Aso	attP40; attP2	Sample#3160010611560022114	f	Aso	Yoshi Aso	GMR_SS01828	GMR_SS01828-20230113_42_C6	Drosophila melanogaster	20x	w; VT065322-p65ADZp in attP40; VT048884-ZpGdbd in attP2
SS01828	20230113_42_F4	A01	Mon Jan 30 14:00:40 EST 2023	253394	asoy_ss_screen_review	UAS_Chrimson_Venus_X_0070	Aso	attP40; attP2	Sample#3160010613309046882	m	Aso	Yoshi Aso	GMR_SS01828	GMR_SS01828-20230113_42_F4	Drosophila melanogaster	20x	w; VT065322-p65ADZp in attP40; VT048884-ZpGdbd in attP2
SS01845	20230113_42_D1	A01	Mon Jan 30 14:00:39 EST 2023	253395	asoy_ss_screen_review	UAS_Chrimson_Venus_X_0070	Aso	attP40; attP2	Sample#3160010611673268322	f	Aso	Yoshi Aso	GMR_SS01845	GMR_SS01845-20230113_42_D1	Drosophila melanogaster	20x	w; VT015830-p65ADZp in attP40; VT057245-ZpGdbd in attP2
SS01845	20230113_42_F5	A01	Mon Jan 30 14:00:40 EST 2023	253395	asoy_ss_screen_review	UAS_Chrimson_Venus_X_0070	Aso	attP40; attP2	Sample#3160010613418098786	m	Aso	Yoshi Aso	GMR_SS01845	GMR_SS01845-20230113_42_F5	Drosophila melanogaster	20x	w; VT015830-p65ADZp in attP40; VT057245-ZpGdbd in attP2
SS01850	20230120_44_A5	A01	Thu Feb 02 13:19:08 EST 2023	253396	asoy_ss_screen_review	UAS_Chrimson_Venus_X_0070	Aso	attP40; attP2	Sample#3161087323358101602	f	Aso	Yoshi Aso	GMR_SS01850	GMR_SS01850-20230120_44_A5	Drosophila melanogaster	20x	w; 24H08-p65ADZp in attP40; VT057245-ZpGdbd in attP2
SS01850	20230120_44_E3	A01	Thu Feb 02 13:19:08 EST 2023	253396	asoy_ss_screen_review	UAS_Chrimson_Venus_X_0070	Aso	attP40; attP2	Sample#3161087325803380834	m	Aso	Yoshi Aso	GMR_SS01850	GMR_SS01850-20230120_44_E3	Drosophila melanogaster	20x	w; 24H08-p65ADZp in attP40; VT057245-ZpGdbd in attP2
SS01854	20230113_42_C5	A01	Mon Jan 30 14:00:39 EST 2023	253393	asoy_ss_screen_review	UAS_Chrimson_Venus_X_0070	Aso	attP40; attP2	Sample#3160010611446775906	f	Aso	Yoshi Aso	GMR_SS01854	GMR_SS01854-20230113_42_C5	Drosophila melanogaster	20x	w; 45F05-p65ADZp in attP40/CyO,Tb; VT057245-ZpGdbd in attP2
SS01854	20230113_42_F3	A01	Mon Jan 30 14:00:40 EST 2023	253393	asoy_ss_screen_review	UAS_Chrimson_Venus_X_0070	Aso	attP40; attP2	Sample#3160010613199994978	m	Aso	Yoshi Aso	GMR_SS01854	GMR_SS01854-20230113_42_F3	Drosophila melanogaster	20x	w; 45F05-p65ADZp in attP40/CyO,Tb; VT057245-ZpGdbd in attP2
SS01868	20230120_44_B1	A01	Thu Feb 02 13:19:08 EST 2023	253398	asoy_ss_screen_review	UAS_Chrimson_Venus_X_0070	Aso	attP40; attP2	Sample#3161087323580399714	f	Aso	Yoshi Aso	GMR_SS01868	GMR_SS01868-20230120_44_B1	Drosophila melanogaster	20x	w; 76G04-p65ADZp in attP40/CyO,Tb; VT057245-ZpGdbd in attP2
SS01868	20230120_44_E5	A01	Thu Feb 02 13:19:08 EST 2023	253398	asoy_ss_screen_review	UAS_Chrimson_Venus_X_0070	Aso	attP40; attP2	Sample#3161087326017290338	m	Aso	Yoshi Aso	GMR_SS01868	GMR_SS01868-20230120_44_E5	Drosophila melanogaster	20x	w; 76G04-p65ADZp in attP40/CyO,Tb; VT057245-ZpGdbd in attP2
SS01965	20221028_47_B5	A01	Wed Nov 09 11:32:40 EST 2022	251509	ditp_ss_screen_review	UAS_Chrimson_Venus_X_0070	Card	attP40; attP2	Sample#3130257563040350306	f	Descending Interneuron	Shigehiro Namiki	GMR_SS01965	GMR_SS01965-20221028_47_B5	Drosophila melanogaster	20x	w; VT043086-p65ADZp in attP40; VT047755-ZpGdbd in attP2/TM6B
SS01965	20221028_47_D5	A01	Wed Nov 09 11:32:40 EST 2022	251509	ditp_ss_screen_review	UAS_Chrimson_Venus_X_0070	Card	attP40; attP2	Sample#3130257565200416866	m	Descending Interneuron	Shigehiro Namiki	GMR_SS01965	GMR_SS01965-20221028_47_D5	Drosophila melanogaster	20x	w; VT043086-p65ADZp in attP40; VT047755-ZpGdbd in attP2/TM6B
SS02023	20220527_44_C2	A01	Thu Jun 09 09:34:09 EDT 2022	246774	nerna_ss_screen_review	UAS_Chrimson_Venus_X_0070	Rubin	attP40; attP2	Sample#3074767293339664482	f	Rubin	Aljoscha Nern	GMR_SS02023	GMR_SS02023-20220527_44_C2	Drosophila melanogaster	20x	w; VT049371-p65ADZp in attP40/CyOTb; VT025999-ZpGDBD in attP2/TM6B
SS02023	20220527_44_F2	A01	Thu Jun 09 09:34:09 EDT 2022	246774	nerna_ss_screen_review	UAS_Chrimson_Venus_X_0070	Rubin	attP40; attP2	Sample#3074767295411650658	m	Rubin	Aljoscha Nern	GMR_SS02023	GMR_SS02023-20220527_44_F2	Drosophila melanogaster	20x	w; VT049371-p65ADZp in attP40/CyOTb; VT025999-ZpGDBD in attP2/TM6B
SS02036	20220128_46_H4	A01	Thu Feb 10 16:45:08 EST 2022	243610	nerna_ss_screen_review	UAS_Chrimson_Venus_X_0070	Rubin	attP40; attP2	Sample#3031766697112502370	f	Rubin	Aljoscha Nern	GMR_SS02036	GMR_SS02036-20220128_46_H4	Drosophila melanogaster	20x	w; VT058557-p65ADZp in attP40; 67E03-ZpGdbd in attP2/TM6B
SS02036	20220128_46_H6	A01	Thu Feb 10 16:45:08 EST 2022	243610	nerna_ss_screen_review	UAS_Chrimson_Venus_X_0070	Rubin	attP40; attP2	Sample#3031766697338994786	m	Rubin	Aljoscha Nern	GMR_SS02036	GMR_SS02036-20220128_46_H6	Drosophila melanogaster	20x	w; VT058557-p65ADZp in attP40; 67E03-ZpGdbd in attP2/TM6B
SS02037	20220527_44_A6	A01	Thu Jun 09 09:34:08 EDT 2022	246771	nerna_ss_screen_review	UAS_Chrimson_Venus_X_0070	Rubin	attP40; attP2	Sample#3074767292446277730	f	Rubin	Aljoscha Nern	GMR_SS02037	GMR_SS02037-20220527_44_A6	Drosophila melanogaster	20x	w; VT058682-p65ADZp in attP40; 95C12-ZpGdbd in attP2
SS02037	20220527_44_D6	A01	Thu Jun 09 09:34:09 EDT 2022	246771	nerna_ss_screen_review	UAS_Chrimson_Venus_X_0070	Rubin	attP40; attP2	Sample#3074767294518263906	m	Rubin	Aljoscha Nern	GMR_SS02037	GMR_SS02037-20220527_44_D6	Drosophila melanogaster	20x	w; VT058682-p65ADZp in attP40; 95C12-ZpGdbd in attP2
SS02037	20221118_44_B3	A01	Tue Dec 13 11:39:37 EST 2022	252153	nerna_ss_screen_review	UAS_Chrimson_Venus_X_0070	Rubin	attP40; attP2	Sample#3142580497880711266	f	Rubin	Aljoscha Nern	GMR_SS02037	GMR_SS02037-20221118_44_B3	Drosophila melanogaster	20x	w; VT058682-p65ADZp in attP40; 95C12-ZpGdbd in attP2
SS02037	20221118_44_B6	A01	Tue Dec 13 11:39:37 EST 2022	252153	nerna_ss_screen_review	UAS_Chrimson_Venus_X_0070	Rubin	attP40; attP2	Sample#3142580498224644194	m	Rubin	Aljoscha Nern	GMR_SS02037	GMR_SS02037-20221118_44_B6	Drosophila melanogaster	20x	w; VT058682-p65ADZp in attP40; 95C12-ZpGdbd in attP2
SS02038	20220527_44_B2	A01	Thu Jun 09 09:34:08 EDT 2022	246773	nerna_ss_screen_review	UAS_Chrimson_Venus_X_0070	Rubin	attP40; attP2	Sample#3074767292672770146	f	Rubin	Aljoscha Nern	GMR_SS02038	GMR_SS02038-20220527_44_B2	Drosophila melanogaster	20x	w; VT058682-p65ADZp in attP40/CyOTb; 95F09-ZpGdbd in attP2
SS02038	20220527_44_E2	A01	Thu Jun 09 09:34:09 EDT 2022	246773	nerna_ss_screen_review	UAS_Chrimson_Venus_X_0070	Rubin	attP40; attP2	Sample#3074767294744756322	m	Rubin	Aljoscha Nern	GMR_SS02038	GMR_SS02038-20220527_44_E2	Drosophila melanogaster	20x	w; VT058682-p65ADZp in attP40/CyOTb; 95F09-ZpGdbd in attP2
SS02043	20230210_46_B2	A01	Thu Feb 23 15:05:38 EST 2023	254179	nerna_ss_screen_review	UAS_Chrimson_Venus_X_0070	Rubin	attP40; attP2	Sample#3168724269987266719	f	Rubin	Aljoscha Nern	GMR_SS02043	GMR_SS02043-20230210_46_B2	Drosophila melanogaster	20x	w; VT005105-p65ADZp in attP40; VT050384-ZpGDBD in attP2
SS02043	20230210_46_D2	A01	Thu Feb 23 15:05:38 EST 2023	254179	nerna_ss_screen_review	UAS_Chrimson_Venus_X_0070	Rubin	attP40; attP2	Sample#3168724271212003487	m	Rubin	Aljoscha Nern	GMR_SS02043	GMR_SS02043-20230210_46_D2	Drosophila melanogaster	20x	w; VT005105-p65ADZp in attP40; VT050384-ZpGDBD in attP2
SS02044	20220527_44_C3	A01	Thu Jun 09 09:34:09 EDT 2022	246775	nerna_ss_screen_review	UAS_Chrimson_Venus_X_0070	Rubin	attP40; attP2	Sample#3074767293452910690	f	Rubin	Aljoscha Nern	GMR_SS02044	GMR_SS02044-20220527_44_C3	Drosophila melanogaster	20x	w; VT029750-p65ADZp in attP40; 41E03-ZpGdbd in attP2
SS02044	20220527_44_F3	A01	Thu Jun 09 09:34:09 EDT 2022	246775	nerna_ss_screen_review	UAS_Chrimson_Venus_X_0070	Rubin	attP40; attP2	Sample#3074767295524896866	m	Rubin	Aljoscha Nern	GMR_SS02044	GMR_SS02044-20220527_44_F3	Drosophila melanogaster	20x	w; VT029750-p65ADZp in attP40; 41E03-ZpGdbd in attP2
SS02050	20220422_45_C4	A01	Thu May 05 12:45:08 EDT 2022	245681	nerna_ss_screen_review	UAS_Chrimson_Venus_X_0070	Rubin	attP40; attP2	Sample#3062131780086661218	f	Rubin	Aljoscha Nern	GMR_SS02050	GMR_SS02050-20220422_45_C4	Drosophila melanogaster	20x	w; 21C01-p65ADZp in attP40/CyOTb; 70B08-ZpGdbd in attP2
SS02050	20220422_46_C4	A01	Thu May 05 15:45:07 EDT 2022	245681	nerna_ss_screen_review	UAS_Chrimson_Venus_X_0070	Rubin	attP40; attP2	Sample#3062177077978464354	m	Rubin	Aljoscha Nern	GMR_SS02050	GMR_SS02050-20220422_46_C4	Drosophila melanogaster	20x	w; 21C01-p65ADZp in attP40/CyOTb; 70B08-ZpGdbd in attP2
SS02052	20230120_44_B3	A01	Thu Feb 02 13:19:08 EST 2023	253400	asoy_ss_screen_review	UAS_Chrimson_Venus_X_0070	Aso	attP40; attP2	Sample#3161087323798503522	f	Aso	Yoshi Aso	GMR_SS02052	GMR_SS02052-20230120_44_B3	Drosophila melanogaster	20x	w; 12C04-p65ADZp in attP40; 14B03-ZpGdbd in attP2
SS02052	20230120_44_F1	A01	Thu Feb 02 13:19:08 EST 2023	253400	asoy_ss_screen_review	UAS_Chrimson_Venus_X_0070	Aso	attP40; attP2	Sample#3161087326227005538	m	Aso	Yoshi Aso	GMR_SS02052	GMR_SS02052-20230120_44_F1	Drosophila melanogaster	20x	w; 12C04-p65ADZp in attP40; 14B03-ZpGdbd in attP2
SS02054	20230210_46_B3	A01	Thu Feb 23 15:05:38 EST 2023	254180	nerna_ss_screen_review	UAS_Chrimson_Venus_X_0070	Rubin	attP40; attP2	Sample#3168724270087930015	f	Rubin	Aljoscha Nern	GMR_SS02054	GMR_SS02054-20230210_46_B3	Drosophila melanogaster	20x	w; 21D06-p65ADZp in attP40; VT013616-ZpGDBD in attP2
SS02054	20230210_46_D3	A01	Thu Feb 23 15:05:38 EST 2023	254180	nerna_ss_screen_review	UAS_Chrimson_Venus_X_0070	Rubin	attP40; attP2	Sample#3168724271316861087	m	Rubin	Aljoscha Nern	GMR_SS02054	GMR_SS02054-20230210_46_D3	Drosophila melanogaster	20x	w; 21D06-p65ADZp in attP40; VT013616-ZpGDBD in attP2
SS02056	20230210_46_B4	A01	Thu Feb 23 15:05:38 EST 2023	254181	nerna_ss_screen_review	UAS_Chrimson_Venus_X_0070	Rubin	attP40; attP2	Sample#3168724270192787615	f	Rubin	Aljoscha Nern	GMR_SS02056	GMR_SS02056-20230210_46_B4	Drosophila melanogaster	20x	w; 20A02-p65ADZp in attP40; 21D06-ZpGdbd in attP2/TM6B
SS02056	20230210_46_D4	A01	Thu Feb 23 15:05:38 EST 2023	254181	nerna_ss_screen_review	UAS_Chrimson_Venus_X_0070	Rubin	attP40; attP2	Sample#3168724271417524383	m	Rubin	Aljoscha Nern	GMR_SS02056	GMR_SS02056-20230210_46_D4	Drosophila melanogaster	20x	w; 20A02-p65ADZp in attP40; 21D06-ZpGdbd in attP2/TM6B
SS02057	20220429_44_H4	A01	Mon May 16 15:46:36 EDT 2022	245680	nerna_ss_screen_review	UAS_Chrimson_Venus_X_0070	Rubin	attP40; attP2	Sample#3066163716132175970	f	Rubin	Aljoscha Nern	GMR_SS02057	GMR_SS02057-20220429_44_H4	Drosophila melanogaster	20x	w; 21B12-p65ADZp in attP40; 17H01-ZpGdbd in attP2
SS02057	20220429_44_I1	A01	Mon May 16 15:46:36 EDT 2022	245680	nerna_ss_screen_review	UAS_Chrimson_Venus_X_0070	Rubin	attP40; attP2	Sample#3066163716455137378	m	Rubin	Aljoscha Nern	GMR_SS02057	GMR_SS02057-20220429_44_I1	Drosophila melanogaster	20x	w; 21B12-p65ADZp in attP40; 17H01-ZpGdbd in attP2
SS02058	20220422_45_B6	A01	Thu May 05 12:45:08 EDT 2022	245677	nerna_ss_screen_review	UAS_Chrimson_Venus_X_0070	Rubin	attP40; attP2	Sample#3062131779973415010	f	Rubin	Aljoscha Nern	GMR_SS02058	GMR_SS02058-20220422_45_B6	Drosophila melanogaster	20x	w; 21B12-p65ADZp in attP40; 27E07-ZpGdbd in attP2
SS02058	20220422_46_B6	A01	Thu May 05 15:45:07 EDT 2022	245677	nerna_ss_screen_review	UAS_Chrimson_Venus_X_0070	Rubin	attP40; attP2	Sample#3062177077559033954	m	Rubin	Aljoscha Nern	GMR_SS02058	GMR_SS02058-20220422_46_B6	Drosophila melanogaster	20x	w; 21B12-p65ADZp in attP40; 27E07-ZpGdbd in attP2
SS02062	20230210_46_B5	A01	Thu Feb 23 15:05:38 EST 2023	254182	nerna_ss_screen_review	UAS_Chrimson_Venus_X_0070	Rubin	attP40; attP2	Sample#3168724270293450911	f	Rubin	Aljoscha Nern	GMR_SS02062	GMR_SS02062-20230210_46_B5	Drosophila melanogaster	20x	w; 26F03-p65ADZp in attP40; VT058437-ZpGDBD in attP2
SS02062	20230210_46_D5	A01	Thu Feb 23 15:05:38 EST 2023	254182	nerna_ss_screen_review	UAS_Chrimson_Venus_X_0070	Rubin	attP40; attP2	Sample#3168724271518187679	m	Rubin	Aljoscha Nern	GMR_SS02062	GMR_SS02062-20230210_46_D5	Drosophila melanogaster	20x	w; 26F03-p65ADZp in attP40; VT058437-ZpGDBD in attP2
SS02072	20220429_44_H3	A01	Mon May 16 15:46:36 EDT 2022	245679	nerna_ss_screen_review	UAS_Chrimson_Venus_X_0070	Rubin	attP40; attP2	Sample#3066163716023124066	f	Rubin	Aljoscha Nern	GMR_SS02072	GMR_SS02072-20220429_44_H3	Drosophila melanogaster	20x	w; 18C12-p65ADZp in attP40/CyOTb; VT013605-ZpGDBD in attP2
SS02072	20220429_44_H6	A01	Mon May 16 15:46:36 EDT 2022	245679	nerna_ss_screen_review	UAS_Chrimson_Venus_X_0070	Rubin	attP40; attP2	Sample#3066163716350279778	m	Rubin	Aljoscha Nern	GMR_SS02072	GMR_SS02072-20220429_44_H6	Drosophila melanogaster	20x	w; 18C12-p65ADZp in attP40/CyOTb; VT013605-ZpGDBD in attP2
SS02075	20230210_46_B6	A01	Thu Feb 23 15:05:38 EST 2023	254183	nerna_ss_screen_review	UAS_Chrimson_Venus_X_0070	Rubin	attP40; attP2	Sample#3168724270394114207	f	Rubin	Aljoscha Nern	GMR_SS02075	GMR_SS02075-20230210_46_B6	Drosophila melanogaster	20x	w; 16E08-p65ADZp in attP40; VT004726-ZpGDBD in attP2
SS02075	20230210_46_D6	A01	Thu Feb 23 15:05:38 EST 2023	254183	nerna_ss_screen_review	UAS_Chrimson_Venus_X_0070	Rubin	attP40; attP2	Sample#3168724271618850975	m	Rubin	Aljoscha Nern	GMR_SS02075	GMR_SS02075-20230210_46_D6	Drosophila melanogaster	20x	w; 16E08-p65ADZp in attP40; VT004726-ZpGDBD in attP2
SS02082	20230217_45_A1	A01	Mon Feb 27 11:12:07 EST 2023	254189	nerna_ss_screen_review	UAS_Chrimson_Venus_X_0070	Rubin	attP40; attP2	Sample#3170115055341535391	f	Rubin	Aljoscha Nern	GMR_SS02082	GMR_SS02082-20230217_45_A1	Drosophila melanogaster	20x	w; VT043284-p65ADZp in attP40/CyOTb; VT000926-ZpGDBD in attP2
SS02082	20230217_46_A1	A01	Tue Feb 28 11:06:07 EST 2023	254189	nerna_ss_screen_review	UAS_Chrimson_Venus_X_0070	Rubin	attP40; attP2	Sample#3170475934146887839	m	Rubin	Aljoscha Nern	GMR_SS02082	GMR_SS02082-20230217_46_A1	Drosophila melanogaster	20x	w; VT043284-p65ADZp in attP40/CyOTb; VT000926-ZpGDBD in attP2
SS02087	20230421_45_B4	A01	Mon May 01 16:53:37 EDT 2023	256182	nerna_ss_screen_review	UAS_Chrimson_Venus_X_0070	Rubin	attP40; attP2	Sample#3193016333344178335	f	Rubin	Aljoscha Nern	GMR_SS02087	GMR_SS02087-20230421_45_B4	Drosophila melanogaster	20x	w; VT007747-p65ADZp in attP40; VT049125-ZpGdbd in attP2
SS02087	20230421_45_E2	A01	Mon May 01 16:53:37 EDT 2023	256182	nerna_ss_screen_review	UAS_Chrimson_Venus_X_0070	Rubin	attP40; attP2	Sample#3193016336104030367	m	Rubin	Aljoscha Nern	GMR_SS02087	GMR_SS02087-20230421_45_E2	Drosophila melanogaster	20x	w; VT007747-p65ADZp in attP40; VT049125-ZpGdbd in attP2
SS02092	20230217_45_A3	A01	Mon Feb 27 11:12:07 EST 2023	254191	nerna_ss_screen_review	UAS_Chrimson_Venus_X_0070	Rubin	attP40; attP2	Sample#3170115055601582239	f	Rubin	Aljoscha Nern	GMR_SS02092	GMR_SS02092-20230217_45_A3	Drosophila melanogaster	20x	w; 16E08-p65ADZp in attP40; VT048843-ZpGdbd in attP2
SS02092	20230217_46_A3	A01	Tue Feb 28 11:06:07 EST 2023	254191	nerna_ss_screen_review	UAS_Chrimson_Venus_X_0070	Rubin	attP40; attP2	Sample#3170475934390157471	m	Rubin	Aljoscha Nern	GMR_SS02092	GMR_SS02092-20230217_46_A3	Drosophila melanogaster	20x	w; 16E08-p65ADZp in attP40; VT048843-ZpGdbd in attP2
SS02096	20230217_45_A4	A01	Mon Feb 27 11:12:07 EST 2023	254192	nerna_ss_screen_review	UAS_Chrimson_Venus_X_0070	Rubin	attP40; attP2	Sample#3170115055706439839	f	Rubin	Aljoscha Nern	GMR_SS02096	GMR_SS02096-20230217_45_A4	Drosophila melanogaster	20x	w; 76B02-p65ADZp in attP40; VT019345-ZpGdbd in attP2
SS02096	20230217_46_A4	A01	Tue Feb 28 11:06:07 EST 2023	254192	nerna_ss_screen_review	UAS_Chrimson_Venus_X_0070	Rubin	attP40; attP2	Sample#3170475934499209375	m	Rubin	Aljoscha Nern	GMR_SS02096	GMR_SS02096-20230217_46_A4	Drosophila melanogaster	20x	w; 76B02-p65ADZp in attP40; VT019345-ZpGdbd in attP2
SS02099	20221104_45_E4	A01	Tue Nov 29 11:56:08 EST 2022	251702	nerna_ss_screen_review	UAS_Chrimson_Venus_X_0070	Rubin	attP40; attP2	Sample#3137511225714278498	f	Rubin	Aljoscha Nern	GMR_SS02099	GMR_SS02099-20221104_45_E4	Drosophila melanogaster	20x	w; 76B02-p65ADZp in attP40; VT046334-ZpGdbd in attP2
SS02099	20221104_45_J3	A01	Tue Nov 29 11:56:07 EST 2022	251702	nerna_ss_screen_review	UAS_Chrimson_Venus_X_0070	Rubin	attP40; attP2	Sample#3137511224057528418	m	Rubin	Aljoscha Nern	GMR_SS02099	GMR_SS02099-20221104_45_J3	Drosophila melanogaster	20x	w; 76B02-p65ADZp in attP40; VT046334-ZpGdbd in attP2
SS02102	20230217_45_A5	A01	Mon Feb 27 11:12:07 EST 2023	254193	nerna_ss_screen_review	UAS_Chrimson_Venus_X_0070	Rubin	attP40; attP2	Sample#3170115055815491743	f	Rubin	Aljoscha Nern	GMR_SS02102	GMR_SS02102-20230217_45_A5	Drosophila melanogaster	20x	w; 87D07-p65ADZp in attP40; VT059225-ZpGdbd in attP2
SS02102	20230217_46_A5	A01	Tue Feb 28 11:06:07 EST 2023	254193	nerna_ss_screen_review	UAS_Chrimson_Venus_X_0070	Rubin	attP40; attP2	Sample#3170475934625038495	m	Rubin	Aljoscha Nern	GMR_SS02102	GMR_SS02102-20230217_46_A5	Drosophila melanogaster	20x	w; 87D07-p65ADZp in attP40; VT059225-ZpGdbd in attP2
SS02103	20230421_45_A5	A01	Mon May 01 16:53:37 EDT 2023	256183	nerna_ss_screen_review	UAS_Chrimson_Venus_X_0070	Rubin	attP40; attP2	Sample#3193016332480151711	f	Rubin	Aljoscha Nern	GMR_SS02103	GMR_SS02103-20230421_45_A5	Drosophila melanogaster	20x	w; 92C07-p65ADZp in attP40/CyOTb; VT026477-ZpGdbd in attP2
SS02103	20230421_45_D3	A01	Mon May 01 16:53:37 EDT 2023	256183	nerna_ss_screen_review	UAS_Chrimson_Venus_X_0070	Rubin	attP40; attP2	Sample#3193016335248392351	m	Rubin	Aljoscha Nern	GMR_SS02103	GMR_SS02103-20230421_45_D3	Drosophila melanogaster	20x	w; 92C07-p65ADZp in attP40/CyOTb; VT026477-ZpGdbd in attP2
SS02111	20200110_46_C6	A01	Fri Jan 24 18:04:42 EST 2020	206186	ditp_ss_screen_review	UAS_Chrimson_Venus_X_0070	Card	attP40; attP2	Sample#2760720597716566114	f			BJD_SS02111	BJD_SS02111-20200110_46_C6	Drosophila melanogaster	20x	w; VT059225-p65ADZp in attP40; VT057283-ZpGdbd in attP2
SS02111	20200110_46_H6	A01	Fri Jan 24 18:04:43 EST 2020	206186	ditp_ss_screen_review	UAS_Chrimson_Venus_X_0070	Card	attP40; attP2	Sample#2760720603177549922	m			BJD_SS02111	BJD_SS02111-20200110_46_H6	Drosophila melanogaster	20x	w; VT059225-p65ADZp in attP40; VT057283-ZpGdbd in attP2
SS02191	20191127_42_G5	A01	Tue Dec 17 15:50:40 EST 2019	204598	wolfft_ss_screen_review	UAS_Chrimson_Venus_X_0070	Rubin		Sample#2746916128973389922	m			GMR_SS02191	GMR_SS02191-20191127_42_G5	Drosophila melanogaster	20x	w; VT000355-p65ADZp in attP40/CyO::Tb-RFP; VT040589-ZpGdbd in attP2/TM6B
SS02191	20191127_42_I3	A01	Tue Dec 17 15:50:40 EST 2019	204598	wolfft_ss_screen_review	UAS_Chrimson_Venus_X_0070	Rubin		Sample#2746916131057959010	f			GMR_SS02191	GMR_SS02191-20191127_42_I3	Drosophila melanogaster	20x	w; VT000355-p65ADZp in attP40/CyO::Tb-RFP; VT040589-ZpGdbd in attP2/TM6B
SS02195	20191127_42_H4	A01	Tue Dec 17 15:50:40 EST 2019	204578	wolfft_ss_screen_review	UAS_Chrimson_Venus_X_0070	Rubin		Sample#2746916130013577314	m			GMR_SS02195	GMR_SS02195-20191127_42_H4	Drosophila melanogaster	20x	w; VT000355-p65ADZp in attP40; 47A08-ZpGdbd in attP2
SS02195	20191127_42_I4	A01	Tue Dec 17 15:50:40 EST 2019	204578	wolfft_ss_screen_review	UAS_Chrimson_Venus_X_0070	Rubin		Sample#2746916131267674210	f			GMR_SS02195	GMR_SS02195-20191127_42_I4	Drosophila melanogaster	20x	w; VT000355-p65ADZp in attP40; 47A08-ZpGdbd in attP2
SS02232	20230317_43_C6	A01	Wed Mar 29 15:31:09 EDT 2023	255011	wolfft_ss_screen_review	UAS_Chrimson_Venus_X_0070	Rubin	attP40; attP2	Sample#3181036783387279519	f	Rubin	Tanya Wolff	GMR_SS02232	GMR_SS02232-20230317_43_C6	Drosophila melanogaster	20x	w; VT025720-p65ADZp in attP40; VT043143-ZpGdbd in attP2
SS02232	20230317_44_B2	A01	Thu Mar 30 15:34:39 EDT 2023	255011	wolfft_ss_screen_review	UAS_Chrimson_Venus_X_0070	Rubin	attP40; attP2	Sample#3181400049493999775	m	Rubin	Tanya Wolff	GMR_SS02232	GMR_SS02232-20230317_44_B2	Drosophila melanogaster	20x	w; VT025720-p65ADZp in attP40; VT043143-ZpGdbd in attP2
SS02254	20191127_42_H1	A01	Tue Dec 17 15:50:40 EST 2019	204596	wolfft_ss_screen_review	UAS_Chrimson_Venus_X_0070	Jayaraman		Sample#2746916129392820322	m			GMR_SS02254	GMR_SS02254-20191127_42_H1	Drosophila melanogaster	20x	w; 15E01-p65ADZp in attP40; VT016114-ZpGdbd in attP2
SS02254	20191127_42_J1	A01	Tue Dec 17 15:50:41 EST 2019	204596	wolfft_ss_screen_review	UAS_Chrimson_Venus_X_0070	Jayaraman		Sample#2746916131959734370	f			GMR_SS02254	GMR_SS02254-20191127_42_J1	Drosophila melanogaster	20x	w; 15E01-p65ADZp in attP40; VT016114-ZpGdbd in attP2
SS02256	20200110_46_B3	A01	Fri Jan 24 18:04:41 EST 2020	206177	ditp_ss_screen_review	UAS_Chrimson_Venus_X_0070	Card	attP40; attP2	Sample#2760720595703300194	f			BJD_SS02256	BJD_SS02256-20200110_46_B3	Drosophila melanogaster	20x	w; VT019018-p65ADZp in attP40; VT017411-ZpGdbd in attP2
SS02256	20200110_46_G3	A01	Fri Jan 24 18:04:43 EST 2020	206177	ditp_ss_screen_review	UAS_Chrimson_Venus_X_0070	Card	attP40; attP2	Sample#2760720601185255522	m			BJD_SS02256	BJD_SS02256-20200110_46_G3	Drosophila melanogaster	20x	w; VT019018-p65ADZp in attP40; VT017411-ZpGdbd in attP2
SS02257	20200110_46_C4	A01	Fri Jan 24 18:04:42 EST 2020	206184	ditp_ss_screen_review	UAS_Chrimson_Venus_X_0070	Card	attP40; attP2	Sample#2760720597271969890	f			GMR_SS02257	GMR_SS02257-20200110_46_C4	Drosophila melanogaster	20x	w; 10A07-p65ADZp in attP40; VT057470-ZpGdbd in attP2
SS02257	20200110_46_H4	A01	Fri Jan 24 18:04:43 EST 2020	206184	ditp_ss_screen_review	UAS_Chrimson_Venus_X_0070	Card	attP40; attP2	Sample#2760720602741342306	m			GMR_SS02257	GMR_SS02257-20200110_46_H4	Drosophila melanogaster	20x	w; 10A07-p65ADZp in attP40; VT057470-ZpGdbd in attP2
SS02259	20200110_46_A2	A01	Fri Jan 24 18:04:41 EST 2020	206170	ditp_ss_screen_review	UAS_Chrimson_Venus_X_0070	Card	attP40; attP2	Sample#2760720594176573538	f			BJD_SS02259	BJD_SS02259-20200110_46_A2	Drosophila melanogaster	20x	w; VT027166-p65ADZp in attP40; VT009857-ZpGdbd in attP2
SS02259	20200110_46_F2	A01	Fri Jan 24 18:04:42 EST 2020	206170	ditp_ss_screen_review	UAS_Chrimson_Venus_X_0070	Card	attP40; attP2	Sample#2760720599675306082	m			BJD_SS02259	BJD_SS02259-20200110_46_F2	Drosophila melanogaster	20x	w; VT027166-p65ADZp in attP40; VT009857-ZpGdbd in attP2
SS02260	20210521_44_D1	A01	Fri Jun 04 12:36:36 EDT 2021	227746	ditp_ss_screen_review	UAS_Chrimson_Venus_X_0070	Card	attP40; attP2	Sample#2940729700638523490	f	Descending Interneuron	Shigehiro Namiki	BJD_SS02260	BJD_SS02260-20210521_44_D1	Drosophila melanogaster	20x	w; VT015782-p65ADZp in attP40; VT061933-ZpGdbd in attP2
SS02260	20210521_44_I1	A01	Fri Jun 04 12:36:37 EDT 2021	227746	ditp_ss_screen_review	UAS_Chrimson_Venus_X_0070	Card	attP40; attP2	Sample#2940729702374965346	m	Descending Interneuron	Shigehiro Namiki	BJD_SS02260	BJD_SS02260-20210521_44_I1	Drosophila melanogaster	20x	w; VT015782-p65ADZp in attP40; VT061933-ZpGdbd in attP2
SS02270	20191127_42_G4	A01	Tue Dec 17 15:50:40 EST 2019	204599	wolfft_ss_screen_review	UAS_Chrimson_Venus_X_0070	Rubin		Sample#2746916128763674722	m			GMR_SS02270	GMR_SS02270-20191127_42_G4	Drosophila melanogaster	20x	w; 30G06-p65ADZp in attP40; 27A10-ZpGdbd in attP2
SS02270	20191127_42_I2	A01	Tue Dec 17 15:50:40 EST 2019	204599	wolfft_ss_screen_review	UAS_Chrimson_Venus_X_0070	Rubin		Sample#2746916130852438114	f			GMR_SS02270	GMR_SS02270-20191127_42_I2	Drosophila melanogaster	20x	w; 30G06-p65ADZp in attP40; 27A10-ZpGdbd in attP2
SS02275	20200110_46_D3	A01	Fri Jan 24 18:04:42 EST 2020	206189	ditp_ss_screen_review	UAS_Chrimson_Venus_X_0070	Card	attP40; attP2	Sample#2760720598366683234	f			BJD_SS02275	BJD_SS02275-20200110_46_D3	Drosophila melanogaster	20x	w; VT047747-p65ADZp in attP40; VT037825-ZpGdbd in attP2
SS02275	20200110_46_I3	A01	Fri Jan 24 18:04:43 EST 2020	206189	ditp_ss_screen_review	UAS_Chrimson_Venus_X_0070	Card	attP40; attP2	Sample#2760720603894775906	m			BJD_SS02275	BJD_SS02275-20200110_46_I3	Drosophila melanogaster	20x	w; VT047747-p65ADZp in attP40; VT037825-ZpGdbd in attP2
SS02276	20200110_46_C5	A01	Fri Jan 24 18:04:42 EST 2020	206185	ditp_ss_screen_review	UAS_Chrimson_Venus_X_0070	Card	attP40; attP2	Sample#2760720597494268002	f			BJD_SS02276	BJD_SS02276-20200110_46_C5	Drosophila melanogaster	20x	w; VT029814-p65ADZp in attP40/CyO::Tb-RFP; VT047755-ZpGdbd in attP2
SS02276	20200110_46_H5	A01	Fri Jan 24 18:04:43 EST 2020	206185	ditp_ss_screen_review	UAS_Chrimson_Venus_X_0070	Card	attP40; attP2	Sample#2760720602959446114	m			BJD_SS02276	BJD_SS02276-20200110_46_H5	Drosophila melanogaster	20x	w; VT029814-p65ADZp in attP40/CyO::Tb-RFP; VT047755-ZpGdbd in attP2
SS02279	20200110_46_A5	A01	Fri Jan 24 18:04:41 EST 2020	206173	ditp_ss_screen_review	UAS_Chrimson_Venus_X_0070	Card	attP40; attP2	Sample#2760720594826690658	f			BJD_SS02279	BJD_SS02279-20200110_46_A5	Drosophila melanogaster	20x	w; VT020033-p65ADZp in attP40; VT008483-ZpGdbd in attP2
SS02279	20200110_46_F5	A01	Fri Jan 24 18:04:42 EST 2020	206173	ditp_ss_screen_review	UAS_Chrimson_Venus_X_0070	Card	attP40; attP2	Sample#2760720600325423202	m			BJD_SS02279	BJD_SS02279-20200110_46_F5	Drosophila melanogaster	20x	w; VT020033-p65ADZp in attP40; VT008483-ZpGdbd in attP2
SS02285	20200110_46_A4	A01	Fri Jan 24 18:04:41 EST 2020	206172	ditp_ss_screen_review	UAS_Chrimson_Venus_X_0070	Card	attP40; attP2	Sample#2760720594604392546	f			BJD_SS02285	BJD_SS02285-20200110_46_A4	Drosophila melanogaster	20x	w; VT059450-p65ADZp in attP40; VT043626-ZpGdbd in attP2
SS02285	20200110_46_F4	A01	Fri Jan 24 18:04:42 EST 2020	206172	ditp_ss_screen_review	UAS_Chrimson_Venus_X_0070	Card	attP40; attP2	Sample#2760720600107319394	m			BJD_SS02285	BJD_SS02285-20200110_46_F4	Drosophila melanogaster	20x	w; VT059450-p65ADZp in attP40; VT043626-ZpGdbd in attP2
SS02293	20191127_42_G2	A01	Tue Dec 17 15:50:40 EST 2019	204601	wolfft_ss_screen_review	UAS_Chrimson_Venus_X_0070	Rubin		Sample#2746916128348438626	m			GMR_SS02293	GMR_SS02293-20191127_42_G2	Drosophila melanogaster	20x	w; 41G11-p65ADZp in attP40; VT005534-ZpGdbd in attP2
SS02293	20191127_42_H6	A01	Tue Dec 17 15:50:40 EST 2019	204601	wolfft_ss_screen_review	UAS_Chrimson_Venus_X_0070	Rubin		Sample#2746916130433007714	f			GMR_SS02293	GMR_SS02293-20191127_42_H6	Drosophila melanogaster	20x	w; 41G11-p65ADZp in attP40; VT005534-ZpGdbd in attP2
SS02299	20200110_46_C2	A01	Fri Jan 24 18:04:41 EST 2020	206182	ditp_ss_screen_review	UAS_Chrimson_Venus_X_0070	Card	attP40; attP2	Sample#2760720596827373666	f			GMR_SS02299	GMR_SS02299-20200110_46_C2	Drosophila melanogaster	20x	w; 10A12-p65ADZp in attP40; VT004455-ZpGdbd in attP2
SS02299	20200110_46_H2	A01	Fri Jan 24 18:04:43 EST 2020	206182	ditp_ss_screen_review	UAS_Chrimson_Venus_X_0070	Card	attP40; attP2	Sample#2760720602309328994	m			GMR_SS02299	GMR_SS02299-20200110_46_H2	Drosophila melanogaster	20x	w; 10A12-p65ADZp in attP40; VT004455-ZpGdbd in attP2
SS02316	20200110_46_C3	A01	Fri Jan 24 18:04:42 EST 2020	206183	ditp_ss_screen_review	UAS_Chrimson_Venus_X_0070	Card	attP40; attP2	Sample#2760720597053866082	f			GMR_SS02316	GMR_SS02316-20200110_46_C3	Drosophila melanogaster	20x	w; 14H09-p65ADZp in attP40; VT032228-ZpGdbd in attP2
SS02316	20200110_46_H3	A01	Fri Jan 24 18:04:43 EST 2020	206183	ditp_ss_screen_review	UAS_Chrimson_Venus_X_0070	Card	attP40; attP2	Sample#2760720602523238498	m			GMR_SS02316	GMR_SS02316-20200110_46_H3	Drosophila melanogaster	20x	w; 14H09-p65ADZp in attP40; VT032228-ZpGdbd in attP2
SS02324	20200717_43_I1	A01	Wed Aug 12 08:30:35 EDT 2020	212472	ditp_ss_screen_review	UAS_Chrimson_Venus_X_0070	Card	attP40; attP2	Sample#2833400979683016802	f			GMR_SS02324	GMR_SS02324-20200717_43_I1	Drosophila melanogaster	20x	w; 42B02-p65ADZp in attP40/CyO::Tb-RFP; VT042734-ZpGdbd in attP2
SS02324	20200717_44_F6	A01	Wed Aug 12 09:09:05 EDT 2020	212472	ditp_ss_screen_review	UAS_Chrimson_Venus_X_0070	Card	attP40; attP2	Sample#2833410669892599906	m			GMR_SS02324	GMR_SS02324-20200717_44_F6	Drosophila melanogaster	20x	w; 42B02-p65ADZp in attP40/CyO::Tb-RFP; VT042734-ZpGdbd in attP2
SS02344	20200821_42_B5	A01	Thu Sep 03 13:31:38 EDT 2020	213165	nerna_ss_screen_review	UAS_Chrimson_Venus_X_0070	Rubin	attP40; attP2	Sample#2841449275617968226	f			GMR_SS02344	GMR_SS02344-20200821_42_B5	Drosophila melanogaster	20x	w; VT015785-p65ADZp in attP40/CyO::Tb-RFP; 42F06-ZpGdbd in attP2
SS02344	20200821_42_F5	A01	Thu Sep 03 13:31:40 EDT 2020	213165	nerna_ss_screen_review	UAS_Chrimson_Venus_X_0070	Rubin	attP40; attP2	Sample#2841449283826221154	m			GMR_SS02344	GMR_SS02344-20200821_42_F5	Drosophila melanogaster	20x	w; VT015785-p65ADZp in attP40/CyO::Tb-RFP; 42F06-ZpGdbd in attP2
SS02347	20230217_45_B1	A01	Mon Feb 27 11:12:07 EST 2023	254195	nerna_ss_screen_review	UAS_Chrimson_Venus_X_0070	Rubin	attP40; attP2	Sample#3170115056029401247	f	Rubin	Aljoscha Nern	GMR_SS02347	GMR_SS02347-20230217_45_B1	Drosophila melanogaster	20x	w; VT046799-p65ADZp in attP40; 18C12-ZpGdbd in attP2
SS02347	20230217_46_B1	A01	Tue Feb 28 11:06:07 EST 2023	254195	nerna_ss_screen_review	UAS_Chrimson_Venus_X_0070	Rubin	attP40; attP2	Sample#3170475934838947999	m	Rubin	Aljoscha Nern	GMR_SS02347	GMR_SS02347-20230217_46_B1	Drosophila melanogaster	20x	w; VT046799-p65ADZp in attP40; 18C12-ZpGdbd in attP2
SS02349	20230217_45_B2	A01	Mon Feb 27 11:12:07 EST 2023	254196	nerna_ss_screen_review	UAS_Chrimson_Venus_X_0070	Rubin	attP40; attP2	Sample#3170115056134258847	f	Rubin	Aljoscha Nern	GMR_SS02349	GMR_SS02349-20230217_45_B2	Drosophila melanogaster	20x	w; VT029750-p65ADZp in attP40; 81D03-ZpGdbd in attP2
SS02349	20230217_46_B2	A01	Tue Feb 28 11:06:07 EST 2023	254196	nerna_ss_screen_review	UAS_Chrimson_Venus_X_0070	Rubin	attP40; attP2	Sample#3170475934943805599	m	Rubin	Aljoscha Nern	GMR_SS02349	GMR_SS02349-20230217_46_B2	Drosophila melanogaster	20x	w; VT029750-p65ADZp in attP40; 81D03-ZpGdbd in attP2
SS02353	20230217_45_B3	A01	Mon Feb 27 11:12:07 EST 2023	254197	nerna_ss_screen_review	UAS_Chrimson_Venus_X_0070	Rubin	attP40; attP2	Sample#3170115056239116447	f	Rubin	Aljoscha Nern	GMR_SS02353	GMR_SS02353-20230217_45_B3	Drosophila melanogaster	20x	w; VT013616-p65ADZp in attP40/CyOTb; VT025776-ZpGDBD in attP2/TM6B
SS02353	20230217_46_B3	A01	Tue Feb 28 11:06:07 EST 2023	254197	nerna_ss_screen_review	UAS_Chrimson_Venus_X_0070	Rubin	attP40; attP2	Sample#3170475935061246111	m	Rubin	Aljoscha Nern	GMR_SS02353	GMR_SS02353-20230217_46_B3	Drosophila melanogaster	20x	w; VT013616-p65ADZp in attP40/CyOTb; VT025776-ZpGDBD in attP2/TM6B
SS02358	20230217_45_B4	A01	Mon Feb 27 11:12:07 EST 2023	254198	nerna_ss_screen_review	UAS_Chrimson_Venus_X_0070	Rubin	attP40; attP2	Sample#3170115056348168351	f	Rubin	Aljoscha Nern	GMR_SS02358	GMR_SS02358-20230217_45_B4	Drosophila melanogaster	20x	w; 51B11-p65ADZp in attP40; 41C05-ZpGdbd in attP2
SS02358	20230217_46_B4	A01	Tue Feb 28 11:06:07 EST 2023	254198	nerna_ss_screen_review	UAS_Chrimson_Venus_X_0070	Rubin	attP40; attP2	Sample#3170475935170298015	m	Rubin	Aljoscha Nern	GMR_SS02358	GMR_SS02358-20230217_46_B4	Drosophila melanogaster	20x	w; 51B11-p65ADZp in attP40; 41C05-ZpGdbd in attP2
SS02360	20220114_45_A2	A01	Wed Jan 26 13:35:10 EST 2022	242583	nerna_ss_screen_review	UAS_Chrimson_Venus_X_0070	Rubin	VK00027, attP2	Sample#3026283074569633890	f	Rubin	Aljoscha Nern	GMR_SS02360	GMR_SS02360-20220114_45_A2	Drosophila melanogaster	20x	w;; 53D12-p65ADZp in VK00027, 70B10-ZpGdbd in attP2
SS02360	20220114_45_A5	A01	Wed Jan 26 13:35:10 EST 2022	242583	nerna_ss_screen_review	UAS_Chrimson_Venus_X_0070	Rubin	VK00027, attP2	Sample#3026283075140059234	m	Rubin	Aljoscha Nern	GMR_SS02360	GMR_SS02360-20220114_45_A5	Drosophila melanogaster	20x	w;; 53D12-p65ADZp in VK00027, 70B10-ZpGdbd in attP2
SS02361	20201113_44_B5	A01	Mon Nov 23 17:04:39 EST 2020	217103	nerna_ss_screen_review	UAS_Chrimson_Venus_X_0070	Rubin	attP40; attP2	Sample#2870871399612809314	f			GMR_SS02361	GMR_SS02361-20201113_44_B5	Drosophila melanogaster	20x	w; 53D12-p65ADZp in attP40; 70B10-ZpGdbd in attP2
SS02361	20201113_44_E5	A01	Mon Nov 23 17:04:40 EST 2020	217103	nerna_ss_screen_review	UAS_Chrimson_Venus_X_0070	Rubin	attP40; attP2	Sample#2870871402808868962	m			GMR_SS02361	GMR_SS02361-20201113_44_E5	Drosophila melanogaster	20x	w; 53D12-p65ADZp in attP40; 70B10-ZpGdbd in attP2
SS02364	20220527_44_B3	A01	Thu Jun 09 09:34:09 EDT 2022	246776	nerna_ss_screen_review	UAS_Chrimson_Venus_X_0070	Rubin	attP40; attP2	Sample#3074767292781822050	f	Rubin	Aljoscha Nern	GMR_SS02364	GMR_SS02364-20220527_44_B3	Drosophila melanogaster	20x	w; 72H06-p65ADZp in attP40; 26H07-ZpGdbd in attP2/TM6B
SS02364	20220527_44_E3	A01	Thu Jun 09 09:34:09 EDT 2022	246776	nerna_ss_screen_review	UAS_Chrimson_Venus_X_0070	Rubin	attP40; attP2	Sample#3074767294853808226	m	Rubin	Aljoscha Nern	GMR_SS02364	GMR_SS02364-20220527_44_E3	Drosophila melanogaster	20x	w; 72H06-p65ADZp in attP40; 26H07-ZpGdbd in attP2/TM6B
SS02370	20200110_46_D5	A01	Fri Jan 24 18:04:42 EST 2020	206191	ditp_ss_screen_review	UAS_Chrimson_Venus_X_0070	Card	attP40; attP2	Sample#2760720598819668066	f			GMR_SS02370	GMR_SS02370-20200110_46_D5	Drosophila melanogaster	20x	w; 55D12-p65ADZp in attP40/CyO::Tb-RFP; 72H04-ZpGdbd in attP2
SS02370	20200110_46_I5	A01	Fri Jan 24 18:04:43 EST 2020	206191	ditp_ss_screen_review	UAS_Chrimson_Venus_X_0070	Card	attP40; attP2	Sample#2760720604314206306	m			GMR_SS02370	GMR_SS02370-20200110_46_I5	Drosophila melanogaster	20x	w; 55D12-p65ADZp in attP40/CyO::Tb-RFP; 72H04-ZpGdbd in attP2
SS02377	20200710_45_C2	A01	Tue Aug 11 19:54:08 EDT 2020	212422	ditp_ss_screen_review	UAS_Chrimson_Venus_X_0070	Card	attP40; attP2	Sample#2833210611737821282	f			BJD_SS02377	BJD_SS02377-20200710_45_C2	Drosophila melanogaster	20x	w; VT043400-p65ADZp in attP40; VT043662-ZpGdbd in attP2/TM6B
SS02377	20200710_45_F1	A01	Tue Aug 11 19:54:09 EDT 2020	212422	ditp_ss_screen_review	UAS_Chrimson_Venus_X_0070	Card	attP40; attP2	Sample#2833210617773424738	m			BJD_SS02377	BJD_SS02377-20200710_45_F1	Drosophila melanogaster	20x	w; VT043400-p65ADZp in attP40; VT043662-ZpGdbd in attP2/TM6B
SS02378	20200110_46_A1	A01	Fri Jan 24 18:04:41 EST 2020	206169	ditp_ss_screen_review	UAS_Chrimson_Venus_X_0070	Card	attP40; attP2	Sample#2760720593878777954	f			GMR_SS02378	GMR_SS02378-20200110_46_A1	Drosophila melanogaster	20x	w; 61A01-p65ADZp in attP40; 13B05-ZpGdbd in attP2
SS02378	20200110_46_F1	A01	Fri Jan 24 18:04:42 EST 2020	206169	ditp_ss_screen_review	UAS_Chrimson_Venus_X_0070	Card	attP40; attP2	Sample#2760720599461396578	m			GMR_SS02378	GMR_SS02378-20200110_46_F1	Drosophila melanogaster	20x	w; 61A01-p65ADZp in attP40; 13B05-ZpGdbd in attP2
SS02383	20200110_46_B6	A01	Fri Jan 24 18:04:41 EST 2020	206180	ditp_ss_screen_review	UAS_Chrimson_Venus_X_0070	Card	attP40; attP2	Sample#2760720596361805922	f			GMR_SS02383	GMR_SS02383-20200110_46_B6	Drosophila melanogaster	20x	w; VT013121-p65ADZp in attP40/CyO::Tb-RFP; 45H03-ZpGdbd in attP2
SS02383	20200110_46_G6	A01	Fri Jan 24 18:04:43 EST 2020	206180	ditp_ss_screen_review	UAS_Chrimson_Venus_X_0070	Card	attP40; attP2	Sample#2760720601852149858	m			GMR_SS02383	GMR_SS02383-20200110_46_G6	Drosophila melanogaster	20x	w; VT013121-p65ADZp in attP40/CyO::Tb-RFP; 45H03-ZpGdbd in attP2
SS02388	20200117_44_A6	A01	Wed Feb 05 15:27:11 EST 2020	206278	ditp_ss_screen_review	UAS_Chrimson_Venus_X_0070	Card	attP40; attP2	Sample#2765029611027824738	m			GMR_SS02388	GMR_SS02388-20200117_44_A6	Drosophila melanogaster	20x	w; 14H09-p65ADZp in attP40; 61A01-ZpGdbd in attP2
SS02388	20200117_44_E6	A01	Wed Feb 05 15:27:11 EST 2020	206278	ditp_ss_screen_review	UAS_Chrimson_Venus_X_0070	Card	attP40; attP2	Sample#2765029613758316642	f			GMR_SS02388	GMR_SS02388-20200117_44_E6	Drosophila melanogaster	20x	w; 14H09-p65ADZp in attP40; 61A01-ZpGdbd in attP2
SS02392	20200717_46_F1	A01	Wed Aug 12 17:05:35 EDT 2020	212592	ditp_ss_screen_review	UAS_Chrimson_Venus_X_0070	Card	attP40; attP2	Sample#2833530584570003554	f			GMR_SS02392	GMR_SS02392-20200717_46_F1	Drosophila melanogaster	20x	w; VT064490-p65ADZp in attP40; 69C11-ZpGdbd in attP2/TM6B
SS02392	20200717_46_G5	A01	Wed Aug 12 17:05:36 EDT 2020	212592	ditp_ss_screen_review	UAS_Chrimson_Venus_X_0070	Card	attP40; attP2	Sample#2833530585450807394	m			GMR_SS02392	GMR_SS02392-20200717_46_G5	Drosophila melanogaster	20x	w; VT064490-p65ADZp in attP40; 69C11-ZpGdbd in attP2/TM6B
SS02393	20191213_47_A5	A01	Tue Jan 14 15:57:09 EST 2020	205344	ditp_ss_screen_review	UAS_Chrimson_Venus_X_0070	Card	attP40; attP2	Sample#2757064621838827618	m			GMR_SS02393	GMR_SS02393-20191213_47_A5	Drosophila melanogaster	20x	w; VT023490-p65ADZp in attP40/CyO::Tb-RFP; 80H02-ZpGdbd in attP2
SS02393	20191213_47_C5	A01	Tue Jan 14 15:41:40 EST 2020	205344	ditp_ss_screen_review	UAS_Chrimson_Venus_X_0070	Card	attP40; attP2	Sample#2757060724210532450	f			GMR_SS02393	GMR_SS02393-20191213_47_C5	Drosophila melanogaster	20x	w; VT023490-p65ADZp in attP40/CyO::Tb-RFP; 80H02-ZpGdbd in attP2
SS02394	20191213_47_B4	A01	Tue Jan 14 15:57:09 EST 2020	205349	ditp_ss_screen_review	UAS_Chrimson_Venus_X_0070	Card	attP40; attP2	Sample#2757064623151644770	m			GMR_SS02394	GMR_SS02394-20191213_47_B4	Drosophila melanogaster	20x	w; 61H01-p65ADZp in attP40; 82C10-ZpGdbd in attP2/TM6B
SS02394	20191213_47_D4	A01	Tue Jan 14 15:41:40 EST 2020	205349	ditp_ss_screen_review	UAS_Chrimson_Venus_X_0070	Card	attP40; attP2	Sample#2757060724688683106	f			GMR_SS02394	GMR_SS02394-20191213_47_D4	Drosophila melanogaster	20x	w; 61H01-p65ADZp in attP40; 82C10-ZpGdbd in attP2/TM6B
SS02395	20191213_47_A1	A01	Tue Jan 14 15:57:09 EST 2020	205340	ditp_ss_screen_review	UAS_Chrimson_Venus_X_0070	Card	attP40; attP2	Sample#2757064621369065570	m			GMR_SS02395	GMR_SS02395-20191213_47_A1	Drosophila melanogaster	20x	w; VT027175-p65ADZp in attP40; 83B06-ZpGdbd in attP2
SS02395	20191213_47_C1	A01	Tue Jan 14 15:57:10 EST 2020	205340	ditp_ss_screen_review	UAS_Chrimson_Venus_X_0070	Card	attP40; attP2	Sample#2757064623898230882	f			GMR_SS02395	GMR_SS02395-20191213_47_C1	Drosophila melanogaster	20x	w; VT027175-p65ADZp in attP40; 83B06-ZpGdbd in attP2
SS02405	20220527_44_A4	A01	Thu Jun 09 09:34:08 EDT 2022	246769	nerna_ss_screen_review	UAS_Chrimson_Venus_X_0070	Rubin	attP40; attP2	Sample#3074767292211396706	f	Rubin	Aljoscha Nern	BJD_SS02405	BJD_SS02405-20220527_44_A4	Drosophila melanogaster	20x	w; VT047755-p65ADZp in attP40; VT034612-ZpGdbd in attP2
SS02405	20220527_44_D4	A01	Thu Jun 09 09:34:09 EDT 2022	246769	nerna_ss_screen_review	UAS_Chrimson_Venus_X_0070	Rubin	attP40; attP2	Sample#3074767294295965794	m	Rubin	Aljoscha Nern	BJD_SS02405	BJD_SS02405-20220527_44_D4	Drosophila melanogaster	20x	w; VT047755-p65ADZp in attP40; VT034612-ZpGdbd in attP2
SS02406	20230217_45_B5	A01	Mon Feb 27 11:12:07 EST 2023	254199	nerna_ss_screen_review	UAS_Chrimson_Venus_X_0070	Rubin	attP40; attP2	Sample#3170115056499163295	f	Rubin	Aljoscha Nern	BJD_SS02406	BJD_SS02406-20230217_45_B5	Drosophila melanogaster	20x	w; VT048351-p65ADZp in attP40; VT044492-ZpGdbd in attP2/TM6B
SS02406	20230217_46_B5	A01	Tue Feb 28 11:06:07 EST 2023	254199	nerna_ss_screen_review	UAS_Chrimson_Venus_X_0070	Rubin	attP40; attP2	Sample#3170475935275155615	m	Rubin	Aljoscha Nern	BJD_SS02406	BJD_SS02406-20230217_46_B5	Drosophila melanogaster	20x	w; VT048351-p65ADZp in attP40; VT044492-ZpGdbd in attP2/TM6B
SS02407	20230217_45_B6	A01	Mon Feb 27 11:12:07 EST 2023	254200	nerna_ss_screen_review	UAS_Chrimson_Venus_X_0070	Rubin	attP40; attP2	Sample#3170115056612409503	f	Rubin	Aljoscha Nern	BJD_SS02407	BJD_SS02407-20230217_45_B6	Drosophila melanogaster	20x	w; VT057342-p65ADZp in attP40/CyOTb; VT044492-ZpGdbd in attP2/TM6B
SS02407	20230217_46_B6	A01	Tue Feb 28 11:06:07 EST 2023	254200	nerna_ss_screen_review	UAS_Chrimson_Venus_X_0070	Rubin	attP40; attP2	Sample#3170475935384207519	m	Rubin	Aljoscha Nern	BJD_SS02407	BJD_SS02407-20230217_46_B6	Drosophila melanogaster	20x	w; VT057342-p65ADZp in attP40/CyOTb; VT044492-ZpGdbd in attP2/TM6B
SS02409	20210521_44_C1	A01	Fri Jun 04 11:34:36 EDT 2021	227748	nerna_ss_screen_review	UAS_Chrimson_Venus_X_0070	Rubin	attP40; attP2	Sample#2940714095080374370	f	Rubin	Aljoscha Nern	BJD_SS02409	BJD_SS02409-20210521_44_C1	Drosophila melanogaster	20x	w; VT013605-p65ADZp in attP40; VT049113-ZpGdbd in attP2/TM6B
SS02409	20210521_44_H1	A01	Fri Jun 04 11:34:36 EDT 2021	227748	nerna_ss_screen_review	UAS_Chrimson_Venus_X_0070	Rubin	attP40; attP2	Sample#2940714096074424418	m	Rubin	Aljoscha Nern	BJD_SS02409	BJD_SS02409-20210521_44_H1	Drosophila melanogaster	20x	w; VT013605-p65ADZp in attP40; VT049113-ZpGdbd in attP2/TM6B
SS02410	20210521_44_B6	A01	Fri Jun 04 11:34:36 EDT 2021	227744	nerna_ss_screen_review	UAS_Chrimson_Venus_X_0070	Rubin	attP40; attP2	Sample#2940714094933573730	f	Rubin	Aljoscha Nern	BJD_SS02410	BJD_SS02410-20210521_44_B6	Drosophila melanogaster	20x	w; VT049113-p65ADZp in attP40/CyO::Tb-RFP; VT013605-ZpGdbd in attP2
SS02410	20210521_44_G6	A01	Fri Jun 04 11:34:36 EDT 2021	227744	nerna_ss_screen_review	UAS_Chrimson_Venus_X_0070	Rubin	attP40; attP2	Sample#2940714095931818082	m	Rubin	Aljoscha Nern	BJD_SS02410	BJD_SS02410-20210521_44_G6	Drosophila melanogaster	20x	w; VT049113-p65ADZp in attP40/CyO::Tb-RFP; VT013605-ZpGdbd in attP2
SS02413	20221111_44_G5	A01	Tue Dec 06 14:03:08 EST 2022	251730	nerna_ss_screen_review	UAS_Chrimson_Venus_X_0070	Rubin	attP40; attP2	Sample#3140079900984082530	f	Rubin	Aljoscha Nern	BJD_SS02413	BJD_SS02413-20221111_44_G5	Drosophila melanogaster	20x	w; VT013616-p65ADZp in attP40/CyOTb; VT039959-ZpGDBD in attP2
SS02413	20221111_45_F5	A01	Wed Nov 30 16:01:38 EST 2022	251730	nerna_ss_screen_review	UAS_Chrimson_Venus_X_0070	Rubin	attP40; attP2	Sample#3137935395942039650	m	Rubin	Aljoscha Nern	BJD_SS02413	BJD_SS02413-20221111_45_F5	Drosophila melanogaster	20x	w; VT013616-p65ADZp in attP40/CyOTb; VT039959-ZpGDBD in attP2
SS02418	20230217_45_C1	A01	Mon Feb 27 11:12:07 EST 2023	254201	nerna_ss_screen_review	UAS_Chrimson_Venus_X_0070	Rubin	attP40; attP2	Sample#3170115056717267103	f	Rubin	Aljoscha Nern	GMR_SS02418	GMR_SS02418-20230217_45_C1	Drosophila melanogaster	20x	w; 11D02-p65ADZp in attP40; VT002026-ZpGdbd in attP2
SS02418	20230217_46_C1	A01	Tue Feb 28 11:06:07 EST 2023	254201	nerna_ss_screen_review	UAS_Chrimson_Venus_X_0070	Rubin	attP40; attP2	Sample#3170475935497453727	m	Rubin	Aljoscha Nern	GMR_SS02418	GMR_SS02418-20230217_46_C1	Drosophila melanogaster	20x	w; 11D02-p65ADZp in attP40; VT002026-ZpGdbd in attP2
SS02419	20230217_45_C2	A01	Mon Feb 27 11:12:07 EST 2023	254202	nerna_ss_screen_review	UAS_Chrimson_Venus_X_0070	Rubin	attP40; attP2	Sample#3170115056826319007	f	Rubin	Aljoscha Nern	GMR_SS02419	GMR_SS02419-20230217_45_C2	Drosophila melanogaster	20x	w; 40E05-p65ADZp in attP40/CyOTb; VT002026-ZpGdbd in attP2
SS02419	20230217_46_C2	A01	Tue Feb 28 11:06:07 EST 2023	254202	nerna_ss_screen_review	UAS_Chrimson_Venus_X_0070	Rubin	attP40; attP2	Sample#3170475935602311327	m	Rubin	Aljoscha Nern	GMR_SS02419	GMR_SS02419-20230217_46_C2	Drosophila melanogaster	20x	w; 40E05-p65ADZp in attP40/CyOTb; VT002026-ZpGdbd in attP2
SS02422	20230217_45_C3	A01	Mon Feb 27 11:12:07 EST 2023	254203	nerna_ss_screen_review	UAS_Chrimson_Venus_X_0070	Rubin	attP40; attP2	Sample#3170115056931176607	f	Rubin	Aljoscha Nern	BJD_SS02422	BJD_SS02422-20230217_45_C3	Drosophila melanogaster	20x	w; VT046081-p65ADZp in attP40; VT029598-ZpGdbd in attP2
SS02422	20230217_46_C3	A01	Tue Feb 28 11:06:07 EST 2023	254203	nerna_ss_screen_review	UAS_Chrimson_Venus_X_0070	Rubin	attP40; attP2	Sample#3170475935707168927	m	Rubin	Aljoscha Nern	BJD_SS02422	BJD_SS02422-20230217_46_C3	Drosophila melanogaster	20x	w; VT046081-p65ADZp in attP40; VT029598-ZpGdbd in attP2
SS02423	20230217_45_C4	A01	Mon Feb 27 11:12:07 EST 2023	254204	nerna_ss_screen_review	UAS_Chrimson_Venus_X_0070	Rubin	attP40; attP2	Sample#3170115057040228511	f	Rubin	Aljoscha Nern	BJD_SS02423	BJD_SS02423-20230217_45_C4	Drosophila melanogaster	20x	w; VT058723-p65ADZp in attP40; VT004422-ZpGdbd in attP2
SS02423	20230217_46_C4	A01	Tue Feb 28 11:06:07 EST 2023	254204	nerna_ss_screen_review	UAS_Chrimson_Venus_X_0070	Rubin	attP40; attP2	Sample#3170475935824609439	m	Rubin	Aljoscha Nern	BJD_SS02423	BJD_SS02423-20230217_46_C4	Drosophila melanogaster	20x	w; VT058723-p65ADZp in attP40; VT004422-ZpGdbd in attP2
SS02425	20200821_42_A4	A01	Thu Sep 03 13:31:38 EDT 2020	213160	nerna_ss_screen_review	UAS_Chrimson_Venus_X_0070	Rubin	attP40; attP2	Sample#2841449272958779490	f			GMR_SS02425	GMR_SS02425-20200821_42_A4	Drosophila melanogaster	20x	w; 26H07-p65ADZp in attP40; VT010253-ZpGdbd in attP2
SS02425	20200821_42_E4	A01	Thu Sep 03 13:31:40 EDT 2020	213160	nerna_ss_screen_review	UAS_Chrimson_Venus_X_0070	Rubin	attP40; attP2	Sample#2841449281603240034	m			GMR_SS02425	GMR_SS02425-20200821_42_E4	Drosophila melanogaster	20x	w; 26H07-p65ADZp in attP40; VT010253-ZpGdbd in attP2
SS02426	20230217_45_C5	A01	Mon Feb 27 11:12:07 EST 2023	254205	nerna_ss_screen_review	UAS_Chrimson_Venus_X_0070	Rubin	attP40; attP2	Sample#3170115057153474719	f	Rubin	Aljoscha Nern	GMR_SS02426	GMR_SS02426-20230217_45_C5	Drosophila melanogaster	20x	w; 10E07-p65ADZp in attP40/CyOTb; VT017422-ZpGdbd in attP2
SS02426	20230217_46_C5	A01	Tue Feb 28 11:06:07 EST 2023	254205	nerna_ss_screen_review	UAS_Chrimson_Venus_X_0070	Rubin	attP40; attP2	Sample#3170475935929467039	m	Rubin	Aljoscha Nern	GMR_SS02426	GMR_SS02426-20230217_46_C5	Drosophila melanogaster	20x	w; 10E07-p65ADZp in attP40/CyOTb; VT017422-ZpGdbd in attP2
SS02427	20201030_46_J4	A01	Thu Nov 19 05:58:01 EST 2020	215806	nerna_ss_screen_review	UAS_Chrimson_Venus_X_0070	Rubin	attP40; attP2	Sample#2869254083447881826	m			GMR_SS02427	GMR_SS02427-20201030_46_J4	Drosophila melanogaster	20x	w; 19G04-p65ADZp in attP40; VT017422-ZpGdbd in attP2
SS02427	20201030_46_J5	A01	Thu Nov 19 05:58:01 EST 2020	215806	nerna_ss_screen_review	UAS_Chrimson_Venus_X_0070	Rubin	attP40; attP2	Sample#2869254084269965410	f			GMR_SS02427	GMR_SS02427-20201030_46_J5	Drosophila melanogaster	20x	w; 19G04-p65ADZp in attP40; VT017422-ZpGdbd in attP2
SS02430	20210312_42_B3	A01	Fri Apr 09 17:41:44 EDT 2021	222116	nerna_ss_screen_review	UAS_Chrimson_Venus_X_0070	Rubin	attP40; attP2	Sample#2920512767418957922	f	Rubin	Aljoscha Nern	BJD_SS02430	BJD_SS02430-20210312_42_B3	Drosophila melanogaster	20x	w; VT044843-p65ADZp in attP40; VT046779-ZpGdbd in attP2
SS02430	20210312_42_C6	A01	Fri Apr 09 17:41:44 EDT 2021	222116	nerna_ss_screen_review	UAS_Chrimson_Venus_X_0070	Rubin	attP40; attP2	Sample#2920512768970850402	m	Rubin	Aljoscha Nern	BJD_SS02430	BJD_SS02430-20210312_42_C6	Drosophila melanogaster	20x	w; VT044843-p65ADZp in attP40; VT046779-ZpGdbd in attP2
SS02432	20200821_42_B4	A01	Thu Sep 03 13:31:38 EDT 2020	213161	nerna_ss_screen_review	UAS_Chrimson_Venus_X_0070	Rubin	attP40; attP2	Sample#2841449275232092258	f			GMR_SS02432	GMR_SS02432-20200821_42_B4	Drosophila melanogaster	20x	w; 48A07-p65ADZp in attP40/CyO::Tb-RFP; VT046779-ZpGdbd in attP2
SS02432	20200821_42_F4	A01	Thu Sep 03 13:31:40 EDT 2020	213161	nerna_ss_screen_review	UAS_Chrimson_Venus_X_0070	Rubin	attP40; attP2	Sample#2841449283511648354	m			GMR_SS02432	GMR_SS02432-20200821_42_F4	Drosophila melanogaster	20x	w; 48A07-p65ADZp in attP40/CyO::Tb-RFP; VT046779-ZpGdbd in attP2
SS02433	20220527_44_B4	A01	Thu Jun 09 09:34:09 EDT 2022	246777	nerna_ss_screen_review	UAS_Chrimson_Venus_X_0070	Rubin	attP40; attP2	Sample#3074767292895068258	f	Rubin	Aljoscha Nern	BJD_SS02433	BJD_SS02433-20220527_44_B4	Drosophila melanogaster	20x	w; VT049367-p65ADZp in attP40; VT008200-ZpGdbd in attP2/TM6B
SS02433	20220527_44_E4	A01	Thu Jun 09 09:34:09 EDT 2022	246777	nerna_ss_screen_review	UAS_Chrimson_Venus_X_0070	Rubin	attP40; attP2	Sample#3074767294967054434	m	Rubin	Aljoscha Nern	BJD_SS02433	BJD_SS02433-20220527_44_E4	Drosophila melanogaster	20x	w; VT049367-p65ADZp in attP40; VT008200-ZpGdbd in attP2/TM6B
SS02435	20230217_45_C6	A01	Mon Feb 27 11:12:07 EST 2023	254206	nerna_ss_screen_review	UAS_Chrimson_Venus_X_0070	Rubin	attP40; attP2	Sample#3170115057262526623	f	Rubin	Aljoscha Nern	GMR_SS02435	GMR_SS02435-20230217_45_C6	Drosophila melanogaster	20x	w; 89G09-p65ADZp in attP40; VT008200-ZpGdbd in attP2
SS02435	20230217_46_C6	A01	Tue Feb 28 11:06:07 EST 2023	254206	nerna_ss_screen_review	UAS_Chrimson_Venus_X_0070	Rubin	attP40; attP2	Sample#3170475936030130335	m	Rubin	Aljoscha Nern	GMR_SS02435	GMR_SS02435-20230217_46_C6	Drosophila melanogaster	20x	w; 89G09-p65ADZp in attP40; VT008200-ZpGdbd in attP2
SS02436	20230421_45_A6	A01	Mon May 01 16:53:37 EDT 2023	256184	nerna_ss_screen_review	UAS_Chrimson_Venus_X_0070	Rubin	attP40; attP2	Sample#3193016332656312479	f	Rubin	Aljoscha Nern	BJD_SS02436	BJD_SS02436-20230421_45_A6	Drosophila melanogaster	20x	w; VT029598-p65ADZp in attP40/CyOTb; VT046081-ZpGdbd in attP2
SS02436	20230421_45_D4	A01	Mon May 01 16:53:37 EDT 2023	256184	nerna_ss_screen_review	UAS_Chrimson_Venus_X_0070	Rubin	attP40; attP2	Sample#3193016335416164511	m	Rubin	Aljoscha Nern	BJD_SS02436	BJD_SS02436-20230421_45_D4	Drosophila melanogaster	20x	w; VT029598-p65ADZp in attP40/CyOTb; VT046081-ZpGdbd in attP2
SS02437	20200821_42_B1	A01	Thu Sep 03 13:31:38 EDT 2020	213163	nerna_ss_screen_review	UAS_Chrimson_Venus_X_0070	Rubin	attP40; attP2	Sample#2841449274149961826	f			BJD_SS02437	BJD_SS02437-20200821_42_B1	Drosophila melanogaster	20x	w; VT048351-p65ADZp in attP40; VT057342-ZpGdbd in attP2
SS02437	20200821_42_F1	A01	Thu Sep 03 13:31:40 EDT 2020	213163	nerna_ss_screen_review	UAS_Chrimson_Venus_X_0070	Rubin	attP40; attP2	Sample#2841449282572124258	m			BJD_SS02437	BJD_SS02437-20200821_42_F1	Drosophila melanogaster	20x	w; VT048351-p65ADZp in attP40; VT057342-ZpGdbd in attP2
SS02438	20230217_45_D2	A01	Mon Feb 27 11:12:07 EST 2023	254208	nerna_ss_screen_review	UAS_Chrimson_Venus_X_0070	Rubin	attP40; attP2	Sample#3170115057472241823	f	Rubin	Aljoscha Nern	BJD_SS02438	BJD_SS02438-20230217_45_D2	Drosophila melanogaster	20x	w; VT061712-p65ADZp in attP40; VT016986-ZpGdbd in attP2
SS02438	20230217_46_D2	A01	Tue Feb 28 11:06:07 EST 2023	254208	nerna_ss_screen_review	UAS_Chrimson_Venus_X_0070	Rubin	attP40; attP2	Sample#3170475936231456927	m	Rubin	Aljoscha Nern	BJD_SS02438	BJD_SS02438-20230217_46_D2	Drosophila melanogaster	20x	w; VT061712-p65ADZp in attP40; VT016986-ZpGdbd in attP2
SS02439	20221111_44_G6	A01	Tue Dec 06 14:03:08 EST 2022	251731	nerna_ss_screen_review	UAS_Chrimson_Venus_X_0070	Rubin	attP40; attP2	Sample#3140079901097328738	f	Rubin	Aljoscha Nern	BJD_SS02439	BJD_SS02439-20221111_44_G6	Drosophila melanogaster	20x	w; VT059001-p65ADZp in attP40; VT028270-ZpGdbd in attP2
SS02439	20221111_45_F6	A01	Wed Nov 30 16:01:38 EST 2022	251731	nerna_ss_screen_review	UAS_Chrimson_Venus_X_0070	Rubin	attP40; attP2	Sample#3137935396055285858	m	Rubin	Aljoscha Nern	BJD_SS02439	BJD_SS02439-20221111_45_F6	Drosophila melanogaster	20x	w; VT059001-p65ADZp in attP40; VT028270-ZpGdbd in attP2
SS02444	20230217_45_D4	A01	Mon Feb 27 11:12:07 EST 2023	254210	nerna_ss_screen_review	UAS_Chrimson_Venus_X_0070	Rubin	attP40; attP2	Sample#3170115057681957023	f	Rubin	Aljoscha Nern	GMR_SS02444	GMR_SS02444-20230217_45_D4	Drosophila melanogaster	20x	w; VT048655-p65ADZp in attP40/CyOTb; 53C02-ZpGdbd in attP2
SS02444	20230217_46_D4	A01	Tue Feb 28 11:06:07 EST 2023	254210	nerna_ss_screen_review	UAS_Chrimson_Venus_X_0070	Rubin	attP40; attP2	Sample#3170475936436977823	m	Rubin	Aljoscha Nern	GMR_SS02444	GMR_SS02444-20230217_46_D4	Drosophila melanogaster	20x	w; VT048655-p65ADZp in attP40/CyOTb; 53C02-ZpGdbd in attP2
SS02445	20191213_47_A3	A01	Tue Jan 14 15:41:40 EST 2020	205342	ditp_ss_screen_review	UAS_Chrimson_Venus_X_0070	Rubin	attP40; attP2	Sample#2757060723786907746	m			GMR_SS02445	GMR_SS02445-20191213_47_A3	Drosophila melanogaster	20x	w; VT007747-p65ADZp in attP40; 85H06-ZpGdbd in attP2
SS02445	20191213_47_C3	A01	Tue Jan 14 15:41:40 EST 2020	205342	ditp_ss_screen_review	UAS_Chrimson_Venus_X_0070	Rubin	attP40; attP2	Sample#2757060723984040034	f			GMR_SS02445	GMR_SS02445-20191213_47_C3	Drosophila melanogaster	20x	w; VT007747-p65ADZp in attP40; 85H06-ZpGdbd in attP2
SS02448	20201113_44_B4	A01	Mon Nov 23 17:04:39 EST 2020	217102	nerna_ss_screen_review	UAS_Chrimson_Venus_X_0070	Rubin	attP40; attP2	Sample#2870871399247904866	f			GMR_SS02448	GMR_SS02448-20201113_44_B4	Drosophila melanogaster	20x	w; VT046779-p65ADZp in attP40; 41C05-ZpGdbd in attP2
SS02448	20201113_44_E4	A01	Mon Nov 23 17:04:40 EST 2020	217102	nerna_ss_screen_review	UAS_Chrimson_Venus_X_0070	Rubin	attP40; attP2	Sample#2870871402473324642	m			GMR_SS02448	GMR_SS02448-20201113_44_E4	Drosophila melanogaster	20x	w; VT046779-p65ADZp in attP40; 41C05-ZpGdbd in attP2
SS02449	20221111_44_H1	A01	Tue Dec 06 14:03:08 EST 2022	251732	nerna_ss_screen_review	UAS_Chrimson_Venus_X_0070	Rubin	VK00027, attP2	Sample#3140079901206380642	f	Rubin	Aljoscha Nern	GMR_SS02449	GMR_SS02449-20221111_44_H1	Drosophila melanogaster	20x	w; ; 78H05-p65ADZp in VK00027, 54B01-ZpGdbd in attP2
SS02449	20221111_45_G1	A01	Wed Nov 30 16:01:38 EST 2022	251732	nerna_ss_screen_review	UAS_Chrimson_Venus_X_0070	Rubin	VK00027, attP2	Sample#3137935396164337762	m	Rubin	Aljoscha Nern	GMR_SS02449	GMR_SS02449-20221111_45_G1	Drosophila melanogaster	20x	w; ; 78H05-p65ADZp in VK00027, 54B01-ZpGdbd in attP2
SS02512	20230407_43_A2	A01	Thu Apr 20 14:39:34 EDT 2023	255527	dicksonb_ss_screen_review	UAS_Chrimson_Venus_X_0070	Dickson	attP40; attP2	Sample#3188996334166212767	f	Dickson	Barry Dickson	BJD_SS02512	BJD_SS02512-20230407_43_A2	Drosophila melanogaster	20x	w; VT040012-p65ADZp in attP40/CyOTb; 35D04-ZpGdbd in attP2
SS02512	20230407_43_C6	A01	Thu Apr 20 14:39:35 EDT 2023	255527	dicksonb_ss_screen_review	UAS_Chrimson_Venus_X_0070	Dickson	attP40; attP2	Sample#3188996335999123615	m	Dickson	Barry Dickson	BJD_SS02512	BJD_SS02512-20230407_43_C6	Drosophila melanogaster	20x	w; VT040012-p65ADZp in attP40/CyOTb; 35D04-ZpGdbd in attP2
SS02536	20200313_46_E3	A01	Wed Jul 01 13:29:34 EDT 2020	210412	ditp_ss_screen_review	UAS_Chrimson_Venus_X_0070	Card	attP40; attP2	Sample#2818255931899379810	f			BJD_SS02536	BJD_SS02536-20200313_46_E3	Drosophila melanogaster	20x	w; VT040698-p65ADZp in attP40/CyO::Tb-RFP; VT025718-ZpGdbd in attP2
SS02536	20200313_46_E4	A01	Wed Jul 01 13:29:34 EDT 2020	210412	ditp_ss_screen_review	UAS_Chrimson_Venus_X_0070	Card	attP40; attP2	Sample#2818255932113289314	m			BJD_SS02536	BJD_SS02536-20200313_46_E4	Drosophila melanogaster	20x	w; VT040698-p65ADZp in attP40/CyO::Tb-RFP; VT025718-ZpGdbd in attP2
SS02538	20191213_47_B6	A01	Tue Jan 14 15:57:10 EST 2020	205351	ditp_ss_screen_review	UAS_Chrimson_Venus_X_0070	Card	attP40; attP2	Sample#2757064623650766946	m			BJD_SS02538	BJD_SS02538-20191213_47_B6	Drosophila melanogaster	20x	w; VT037825-p65ADZp in attP40; VT020379-ZpGdbd in attP2/TM6B
SS02538	20191213_47_D6	A01	Tue Jan 14 15:57:10 EST 2020	205351	ditp_ss_screen_review	UAS_Chrimson_Venus_X_0070	Card	attP40; attP2	Sample#2757064625420763234	f			BJD_SS02538	BJD_SS02538-20191213_47_D6	Drosophila melanogaster	20x	w; VT037825-p65ADZp in attP40; VT020379-ZpGdbd in attP2/TM6B
SS02541	20210521_44_C5	A01	Fri Jun 04 12:36:36 EDT 2021	227743	ditp_ss_screen_review	UAS_Chrimson_Venus_X_0070	Card	attP40; attP2	Sample#2940729700294590562	f	Descending Interneuron	Shigehiro Namiki	BJD_SS02541	BJD_SS02541-20210521_44_C5	Drosophila melanogaster	20x	w; VT020379-p65ADZp in attP40; VT043626-ZpGdbd in attP2
SS02541	20210521_44_H5	A01	Fri Jun 04 12:36:37 EDT 2021	227743	ditp_ss_screen_review	UAS_Chrimson_Venus_X_0070	Card	attP40; attP2	Sample#2940729702068781154	m	Descending Interneuron	Shigehiro Namiki	BJD_SS02541	BJD_SS02541-20210521_44_H5	Drosophila melanogaster	20x	w; VT020379-p65ADZp in attP40; VT043626-ZpGdbd in attP2
SS02544	20230728_46_E4	A01	Wed Aug 23 13:23:36 EDT 2023	259152	ditp_ss_screen_review	UAS_Chrimson_Venus_X_0070	Card	attP40; attP2	Sample#3234275697396547743	f	DI	DI	GMR_SS02544	GMR_SS02544-20230728_46_E4	Drosophila melanogaster	20x	w; 19G08-p65ADZp in attP40; VT020379-ZpGDBD in attP2/TM6B
SS02544	20230728_46_G2	A01	Wed Aug 23 13:23:36 EDT 2023	259152	ditp_ss_screen_review	UAS_Chrimson_Venus_X_0070	Card	attP40; attP2	Sample#3234275698667421855	m	DI	DI	GMR_SS02544	GMR_SS02544-20230728_46_G2	Drosophila melanogaster	20x	w; 19G08-p65ADZp in attP40; VT020379-ZpGDBD in attP2/TM6B
SS02545	20220114_45_C1	A01	Wed Jan 26 14:27:06 EST 2022	242814	ditp_ss_screen_review	UAS_Chrimson_Venus_X_0070	Card	attP40; attP2	Sample#3026296143454666850	f	Descending Interneuron	Shigehiro Namiki	GMR_SS02545	GMR_SS02545-20220114_45_C1	Drosophila melanogaster	20x	w; 22C05-p65ADZp in attP40; VT025718-ZpGdbd in attP2
SS02545	20220114_45_C6	A01	Wed Jan 26 14:27:06 EST 2022	242814	ditp_ss_screen_review	UAS_Chrimson_Venus_X_0070	Card	attP40; attP2	Sample#3026296143869902946	m	Descending Interneuron	Shigehiro Namiki	GMR_SS02545	GMR_SS02545-20220114_45_C6	Drosophila melanogaster	20x	w; 22C05-p65ADZp in attP40; VT025718-ZpGdbd in attP2
SS02550	20230728_46_E5	A01	Wed Aug 23 13:23:36 EDT 2023	259153	ditp_ss_screen_review	UAS_Chrimson_Venus_X_0070	Card	attP40; attP2	Sample#3234275697522376863	f	DI	DI	GMR_SS02550	GMR_SS02550-20230728_46_E5	Drosophila melanogaster	20x	w; 42B02-p65ADZp in attP40; VT020379-ZpGDBD in attP2/TM6B
SS02550	20230728_46_G3	A01	Wed Aug 23 13:23:36 EDT 2023	259153	ditp_ss_screen_review	UAS_Chrimson_Venus_X_0070	Card	attP40; attP2	Sample#3234275698793250975	m	DI	DI	GMR_SS02550	GMR_SS02550-20230728_46_G3	Drosophila melanogaster	20x	w; 42B02-p65ADZp in attP40; VT020379-ZpGDBD in attP2/TM6B
SS02551	20230728_46_E6	A01	Wed Aug 23 13:23:36 EDT 2023	259154	ditp_ss_screen_review	UAS_Chrimson_Venus_X_0070	Card	attP40; attP2	Sample#3234275697648205983	f	DI	DI	GMR_SS02551	GMR_SS02551-20230728_46_E6	Drosophila melanogaster	20x	w; 42B02-p65ADZp in attP40; VT025789-ZpGDBD in attP2
SS02551	20230728_46_G4	A01	Wed Aug 23 13:23:36 EDT 2023	259154	ditp_ss_screen_review	UAS_Chrimson_Venus_X_0070	Card	attP40; attP2	Sample#3234275698923274399	m	DI	DI	GMR_SS02551	GMR_SS02551-20230728_46_G4	Drosophila melanogaster	20x	w; 42B02-p65ADZp in attP40; VT025789-ZpGDBD in attP2
SS02555	20210521_44_C4	A01	Fri Jun 04 12:36:36 EDT 2021	227742	ditp_ss_screen_review	UAS_Chrimson_Venus_X_0070	Card	attP40; attP2	Sample#2940729700126818402	f	Descending Interneuron	Shigehiro Namiki	GMR_SS02555	GMR_SS02555-20210521_44_C4	Drosophila melanogaster	20x	w; 81C11-p65ADZp in attP40; VT025598-ZpGdbd in attP2
SS02555	20210521_44_H4	A01	Fri Jun 04 12:36:37 EDT 2021	227742	ditp_ss_screen_review	UAS_Chrimson_Venus_X_0070	Card	attP40; attP2	Sample#2940729701917786210	m	Descending Interneuron	Shigehiro Namiki	GMR_SS02555	GMR_SS02555-20210521_44_H4	Drosophila melanogaster	20x	w; 81C11-p65ADZp in attP40; VT025598-ZpGdbd in attP2
SS02557	20230217_45_D5	A01	Mon Feb 27 11:12:07 EST 2023	254211	nerna_ss_screen_review	UAS_Chrimson_Venus_X_0070	Rubin	attP40; attP2	Sample#3170115057782620319	f	Rubin	Aljoscha Nern	GMR_SS02557	GMR_SS02557-20230217_45_D5	Drosophila melanogaster	20x	w; 19C07-p65ADZp in attP40; VT022243-ZpGDBD in attP2
SS02557	20230217_46_D5	A01	Tue Feb 28 11:06:07 EST 2023	254211	nerna_ss_screen_review	UAS_Chrimson_Venus_X_0070	Rubin	attP40; attP2	Sample#3170475936537641119	m	Rubin	Aljoscha Nern	GMR_SS02557	GMR_SS02557-20230217_46_D5	Drosophila melanogaster	20x	w; 19C07-p65ADZp in attP40; VT022243-ZpGDBD in attP2
SS02559	20230217_45_D6	A01	Mon Feb 27 11:12:07 EST 2023	254212	nerna_ss_screen_review	UAS_Chrimson_Venus_X_0070	Rubin	attP40; attP2	Sample#3170115057883283615	f	Rubin	Aljoscha Nern	GMR_SS02559	GMR_SS02559-20230217_45_D6	Drosophila melanogaster	20x	w; 23C03-p65ADZp in attP40; VT043152-ZpGDBD in attP2/TM6B
SS02559	20230217_46_D6	A01	Tue Feb 28 11:06:07 EST 2023	254212	nerna_ss_screen_review	UAS_Chrimson_Venus_X_0070	Rubin	attP40; attP2	Sample#3170475936642498719	m	Rubin	Aljoscha Nern	GMR_SS02559	GMR_SS02559-20230217_46_D6	Drosophila melanogaster	20x	w; 23C03-p65ADZp in attP40; VT043152-ZpGDBD in attP2/TM6B
SS02563	20230217_45_E1	A01	Mon Feb 27 11:12:07 EST 2023	254213	nerna_ss_screen_review	UAS_Chrimson_Venus_X_0070	Rubin	attP40; attP2	Sample#3170115057983946911	f	Rubin	Aljoscha Nern	GMR_SS02563	GMR_SS02563-20230217_45_E1	Drosophila melanogaster	20x	w; 43F05-p65ADZp in attP40; VT029799-ZpGdbd in attP2
SS02563	20230217_46_E1	A01	Tue Feb 28 11:06:07 EST 2023	254213	nerna_ss_screen_review	UAS_Chrimson_Venus_X_0070	Rubin	attP40; attP2	Sample#3170475936747356319	m	Rubin	Aljoscha Nern	GMR_SS02563	GMR_SS02563-20230217_46_E1	Drosophila melanogaster	20x	w; 43F05-p65ADZp in attP40; VT029799-ZpGdbd in attP2
SS02574	20221111_44_H2	A01	Tue Dec 06 14:03:08 EST 2022	251733	nerna_ss_screen_review	UAS_Chrimson_Venus_X_0070	Rubin	attP40; attP2	Sample#3140079901319626850	f	Rubin	Aljoscha Nern	GMR_SS02574	GMR_SS02574-20221111_44_H2	Drosophila melanogaster	20x	w; 80B01-p65ADZp in attP40; VT038219-ZpGdbd in attP2
SS02574	20221111_45_G2	A01	Wed Nov 30 16:01:38 EST 2022	251733	nerna_ss_screen_review	UAS_Chrimson_Venus_X_0070	Rubin	attP40; attP2	Sample#3137935396277583970	m	Rubin	Aljoscha Nern	GMR_SS02574	GMR_SS02574-20221111_45_G2	Drosophila melanogaster	20x	w; 80B01-p65ADZp in attP40; VT038219-ZpGdbd in attP2
SS02575	20201113_44_B6	A01	Mon Nov 23 17:04:39 EST 2020	217104	nerna_ss_screen_review	UAS_Chrimson_Venus_X_0070	Rubin	attP40; attP2	Sample#2870871399994490978	f			GMR_SS02575	GMR_SS02575-20201113_44_B6	Drosophila melanogaster	20x	w; 81A05-p65ADZp in attP40/CyO::Tb-RFP; VT031495-ZpGdbd in attP2/TM6B
SS02575	20201113_44_E6	A01	Mon Nov 23 17:04:40 EST 2020	217104	nerna_ss_screen_review	UAS_Chrimson_Venus_X_0070	Rubin	attP40; attP2	Sample#2870871403123441762	m			GMR_SS02575	GMR_SS02575-20201113_44_E6	Drosophila melanogaster	20x	w; 81A05-p65ADZp in attP40/CyO::Tb-RFP; VT031495-ZpGdbd in attP2/TM6B
SS02577	20221111_44_H3	A01	Tue Dec 06 14:03:08 EST 2022	251734	nerna_ss_screen_review	UAS_Chrimson_Venus_X_0070	Rubin	attP40; attP2	Sample#3140079901428678754	f	Rubin	Aljoscha Nern	GMR_SS02577	GMR_SS02577-20221111_44_H3	Drosophila melanogaster	20x	w; 94E06-p65ADZp in attP40/CyOTb; VT026017-ZpGDBD in attP2
SS02577	20221111_45_G3	A01	Wed Nov 30 16:01:38 EST 2022	251734	nerna_ss_screen_review	UAS_Chrimson_Venus_X_0070	Rubin	attP40; attP2	Sample#3137935396390830178	m	Rubin	Aljoscha Nern	GMR_SS02577	GMR_SS02577-20221111_45_G3	Drosophila melanogaster	20x	w; 94E06-p65ADZp in attP40/CyOTb; VT026017-ZpGDBD in attP2
SS02582	20220527_44_B5	A01	Thu Jun 09 09:34:09 EDT 2022	246778	nerna_ss_screen_review	UAS_Chrimson_Venus_X_0070	Rubin	attP40; attP2	Sample#3074767293008314466	f	Rubin	Aljoscha Nern	BJD_SS02582	BJD_SS02582-20220527_44_B5	Drosophila melanogaster	20x	w; VT058548-p65ADZp in attP40; VT019717-ZpGdbd in attP2
SS02582	20220527_44_E5	A01	Thu Jun 09 09:34:09 EDT 2022	246778	nerna_ss_screen_review	UAS_Chrimson_Venus_X_0070	Rubin	attP40; attP2	Sample#3074767295076106338	m	Rubin	Aljoscha Nern	BJD_SS02582	BJD_SS02582-20220527_44_E5	Drosophila melanogaster	20x	w; VT058548-p65ADZp in attP40; VT019717-ZpGdbd in attP2
SS02586	20230217_45_E2	A01	Mon Feb 27 11:12:07 EST 2023	254214	nerna_ss_screen_review	UAS_Chrimson_Venus_X_0070	Rubin	attP40; attP2	Sample#3170115058088804511	f	Rubin	Aljoscha Nern	GMR_SS02586	GMR_SS02586-20230217_45_E2	Drosophila melanogaster	20x	w; VT048356-p65ADZp in attP40; 16E12-ZpGdbd in attP2/TM6B
SS02586	20230217_46_E2	A01	Tue Feb 28 11:06:07 EST 2023	254214	nerna_ss_screen_review	UAS_Chrimson_Venus_X_0070	Rubin	attP40; attP2	Sample#3170475936848019615	m	Rubin	Aljoscha Nern	GMR_SS02586	GMR_SS02586-20230217_46_E2	Drosophila melanogaster	20x	w; VT048356-p65ADZp in attP40; 16E12-ZpGdbd in attP2/TM6B
SS02588	20230217_45_E3	A01	Mon Feb 27 11:12:07 EST 2023	254215	nerna_ss_screen_review	UAS_Chrimson_Venus_X_0070	Rubin	attP40; attP2	Sample#3170115058189467807	f	Rubin	Aljoscha Nern	GMR_SS02588	GMR_SS02588-20230217_45_E3	Drosophila melanogaster	20x	w; 45H04-p65ADZp in attP40/CyOTb; 27A10-ZpGdbd in attP2
SS02588	20230217_46_E3	A01	Tue Feb 28 11:06:07 EST 2023	254215	nerna_ss_screen_review	UAS_Chrimson_Venus_X_0070	Rubin	attP40; attP2	Sample#3170475936952877215	m	Rubin	Aljoscha Nern	GMR_SS02588	GMR_SS02588-20230217_46_E3	Drosophila melanogaster	20x	w; 45H04-p65ADZp in attP40/CyOTb; 27A10-ZpGdbd in attP2
SS02591	20230217_45_E4	A01	Mon Feb 27 11:12:07 EST 2023	254216	nerna_ss_screen_review	UAS_Chrimson_Venus_X_0070	Rubin	attP40; attP2	Sample#3170115058294325407	f	Rubin	Aljoscha Nern	GMR_SS02591	GMR_SS02591-20230217_45_E4	Drosophila melanogaster	20x	w; VT046248-p65ADZp in attP40/CyOTb; 72E04-ZpGdbd in attP2
SS02591	20230217_46_E4	A01	Tue Feb 28 11:06:07 EST 2023	254216	nerna_ss_screen_review	UAS_Chrimson_Venus_X_0070	Rubin	attP40; attP2	Sample#3170475937099677855	m	Rubin	Aljoscha Nern	GMR_SS02591	GMR_SS02591-20230217_46_E4	Drosophila melanogaster	20x	w; VT046248-p65ADZp in attP40/CyOTb; 72E04-ZpGdbd in attP2
SS02592	20200821_42_B3	A01	Thu Sep 03 13:31:38 EDT 2020	213169	nerna_ss_screen_review	UAS_Chrimson_Venus_X_0070	Rubin	attP40; attP2	Sample#2841449274871382114	f			GMR_SS02592	GMR_SS02592-20200821_42_B3	Drosophila melanogaster	20x	w; 12C04-p65ADZp in attP40; 75H07-ZpGdbd in attP2
SS02592	20200821_42_F3	A01	Thu Sep 03 13:31:40 EDT 2020	213169	nerna_ss_screen_review	UAS_Chrimson_Venus_X_0070	Rubin	attP40; attP2	Sample#2841449283201269858	m			GMR_SS02592	GMR_SS02592-20200821_42_F3	Drosophila melanogaster	20x	w; 12C04-p65ADZp in attP40; 75H07-ZpGdbd in attP2
SS02594	20200821_42_A1	A01	Thu Sep 03 13:31:37 EDT 2020	213168	nerna_ss_screen_review	UAS_Chrimson_Venus_X_0070	Rubin	attP40; attP2	Sample#2841449271830511714	f			GMR_SS02594	GMR_SS02594-20200821_42_A1	Drosophila melanogaster	20x	w; 26A02-p65ADZp in attP40 (backcrossed 3x to w1118); 73C02-ZpGdbd in attP2
SS02594	20200821_42_E1	A01	Thu Sep 03 13:31:40 EDT 2020	213168	nerna_ss_screen_review	UAS_Chrimson_Venus_X_0070	Rubin	attP40; attP2	Sample#2841449280495943778	m			GMR_SS02594	GMR_SS02594-20200821_42_E1	Drosophila melanogaster	20x	w; 26A02-p65ADZp in attP40 (backcrossed 3x to w1118); 73C02-ZpGdbd in attP2
SS02597	20230217_45_E5	A01	Mon Feb 27 11:12:07 EST 2023	254217	nerna_ss_screen_review	UAS_Chrimson_Venus_X_0070	Rubin	attP40; attP2	Sample#3170115058394988703	f	Rubin	Aljoscha Nern	GMR_SS02597	GMR_SS02597-20230217_45_E5	Drosophila melanogaster	20x	w; VT032404-p65ADZp in attP40; 43F05-ZpGdbd in attP2
SS02597	20230217_46_E5	A01	Tue Feb 28 11:06:08 EST 2023	254217	nerna_ss_screen_review	UAS_Chrimson_Venus_X_0070	Rubin	attP40; attP2	Sample#3170475937204535455	m	Rubin	Aljoscha Nern	GMR_SS02597	GMR_SS02597-20230217_46_E5	Drosophila melanogaster	20x	w; VT032404-p65ADZp in attP40; 43F05-ZpGdbd in attP2
SS02598	20220527_44_B6	A01	Thu Jun 09 09:34:09 EDT 2022	246779	nerna_ss_screen_review	UAS_Chrimson_Venus_X_0070	Rubin	attP40; attP2	Sample#3074767293117366370	f	Rubin	Aljoscha Nern	GMR_SS02598	GMR_SS02598-20220527_44_B6	Drosophila melanogaster	20x	w; VT043653-p65ADZp in attP40; 88C07-ZpGdbd in attP2
SS02598	20220527_44_E6	A01	Thu Jun 09 09:34:09 EDT 2022	246779	nerna_ss_screen_review	UAS_Chrimson_Venus_X_0070	Rubin	attP40; attP2	Sample#3074767295189352546	m	Rubin	Aljoscha Nern	GMR_SS02598	GMR_SS02598-20220527_44_E6	Drosophila melanogaster	20x	w; VT043653-p65ADZp in attP40; 88C07-ZpGdbd in attP2
SS02599	20230217_45_E6	A01	Mon Feb 27 11:12:07 EST 2023	254218	nerna_ss_screen_review	UAS_Chrimson_Venus_X_0070	Rubin	attP40; attP2	Sample#3170115058495651999	f	Rubin	Aljoscha Nern	GMR_SS02599	GMR_SS02599-20230217_45_E6	Drosophila melanogaster	20x	w; 22D03-p65ADZp in attP40; 88C07-ZpGdbd in attP2
SS02599	20230217_46_E6	A01	Tue Feb 28 11:06:08 EST 2023	254218	nerna_ss_screen_review	UAS_Chrimson_Venus_X_0070	Rubin	attP40; attP2	Sample#3170475937309393055	m	Rubin	Aljoscha Nern	GMR_SS02599	GMR_SS02599-20230217_46_E6	Drosophila melanogaster	20x	w; 22D03-p65ADZp in attP40; 88C07-ZpGdbd in attP2
SS02603	20230217_45_F1	A01	Mon Feb 27 11:12:07 EST 2023	254219	nerna_ss_screen_review	UAS_Chrimson_Venus_X_0070	Rubin	attP40; attP2	Sample#3170115058596315295	f	Rubin	Aljoscha Nern	GMR_SS02603	GMR_SS02603-20230217_45_F1	Drosophila melanogaster	20x	w; VT029799-p65ADZp in attP40; 26E12-ZpGdbd in attP2
SS02603	20230217_46_F1	A01	Tue Feb 28 11:06:08 EST 2023	254219	nerna_ss_screen_review	UAS_Chrimson_Venus_X_0070	Rubin	attP40; attP2	Sample#3170475937414250655	m	Rubin	Aljoscha Nern	GMR_SS02603	GMR_SS02603-20230217_46_F1	Drosophila melanogaster	20x	w; VT029799-p65ADZp in attP40; 26E12-ZpGdbd in attP2
SS02604	20230217_45_F2	A01	Mon Feb 27 11:12:07 EST 2023	254220	nerna_ss_screen_review	UAS_Chrimson_Venus_X_0070	Rubin	attP40; attP2	Sample#3170115058696978591	f	Rubin	Aljoscha Nern	GMR_SS02604	GMR_SS02604-20230217_45_F2	Drosophila melanogaster	20x	w; 94E06-p65ADZp in attP40; 94F01-ZpGdbd in attP2
SS02604	20230217_46_F2	A01	Tue Feb 28 11:06:08 EST 2023	254220	nerna_ss_screen_review	UAS_Chrimson_Venus_X_0070	Rubin	attP40; attP2	Sample#3170475937519108255	m	Rubin	Aljoscha Nern	GMR_SS02604	GMR_SS02604-20230217_46_F2	Drosophila melanogaster	20x	w; 94E06-p65ADZp in attP40; 94F01-ZpGdbd in attP2
SS02605	20230217_45_F3	A01	Mon Feb 27 11:12:07 EST 2023	254221	nerna_ss_screen_review	UAS_Chrimson_Venus_X_0070	Rubin	attP40; attP2	Sample#3170115058793447583	f	Rubin	Aljoscha Nern	GMR_SS02605	GMR_SS02605-20230217_45_F3	Drosophila melanogaster	20x	w; 82D11-p65ADZp in attP40/CyOTb; 94E06-ZpGdbd in attP2
SS02605	20230217_46_F3	A01	Tue Feb 28 11:06:08 EST 2023	254221	nerna_ss_screen_review	UAS_Chrimson_Venus_X_0070	Rubin	attP40; attP2	Sample#3170475937623965855	m	Rubin	Aljoscha Nern	GMR_SS02605	GMR_SS02605-20230217_46_F3	Drosophila melanogaster	20x	w; 82D11-p65ADZp in attP40/CyOTb; 94E06-ZpGdbd in attP2
SS02608	20200117_44_C1	A01	Wed Feb 05 15:27:11 EST 2020	206286	ditp_ss_screen_review	UAS_Chrimson_Venus_X_0070	Card	attP40; attP2	Sample#2765029612042846306	m			BJD_SS02608	BJD_SS02608-20200117_44_C1	Drosophila melanogaster	20x	w; VT025739-p65ADZp in attP40/CyO::Tb-RFP; VT025999-ZpGdbd in attP2/TM6B
SS02608	20200117_44_G1	A01	Wed Feb 05 15:27:11 EST 2020	206286	ditp_ss_screen_review	UAS_Chrimson_Venus_X_0070	Card	attP40; attP2	Sample#2765029614760755298	f			BJD_SS02608	BJD_SS02608-20200117_44_G1	Drosophila melanogaster	20x	w; VT025739-p65ADZp in attP40/CyO::Tb-RFP; VT025999-ZpGdbd in attP2/TM6B
SS02609	20200117_44_B4	A01	Wed Feb 05 15:27:11 EST 2020	206288	ditp_ss_screen_review	UAS_Chrimson_Venus_X_0070	Card	attP40; attP2	Sample#2765029611615027298	m			BJD_SS02609	BJD_SS02609-20200117_44_B4	Drosophila melanogaster	20x	w; VT025739-p65ADZp in attP40; VT032280-ZpGdbd in attP2
SS02609	20200117_44_F4	A01	Wed Feb 05 15:27:11 EST 2020	206288	ditp_ss_screen_review	UAS_Chrimson_Venus_X_0070	Card	attP40; attP2	Sample#2765029614324547682	f			BJD_SS02609	BJD_SS02609-20200117_44_F4	Drosophila melanogaster	20x	w; VT025739-p65ADZp in attP40; VT032280-ZpGdbd in attP2
SS02610	20210521_44_D3	A01	Fri Jun 04 12:36:36 EDT 2021	227749	ditp_ss_screen_review	UAS_Chrimson_Venus_X_0070	Card	attP40; attP2	Sample#2940729700953096290	f	Descending Interneuron	Shigehiro Namiki	BJD_SS02610	BJD_SS02610-20210521_44_D3	Drosophila melanogaster	20x	w; VT029814-p65ADZp in attP40; VT008145-ZpGdbd in attP2/TM6B
SS02610	20210521_44_I3	A01	Fri Jun 04 12:36:37 EDT 2021	227749	ditp_ss_screen_review	UAS_Chrimson_Venus_X_0070	Card	attP40; attP2	Sample#2940729702685343842	m	Descending Interneuron	Shigehiro Namiki	BJD_SS02610	BJD_SS02610-20210521_44_I3	Drosophila melanogaster	20x	w; VT029814-p65ADZp in attP40; VT008145-ZpGdbd in attP2/TM6B
SS02612	20200117_44_C5	A01	Wed Feb 05 15:27:11 EST 2020	206293	ditp_ss_screen_review	UAS_Chrimson_Venus_X_0070	Card	attP40; attP2	Sample#2765029612625854562	m			BJD_SS02612	BJD_SS02612-20200117_44_C5	Drosophila melanogaster	20x	w; VT047755-p65ADZp in attP40; VT003280-ZpGdbd in attP2
SS02612	20200117_44_G5	A01	Wed Feb 05 15:27:12 EST 2020	206293	ditp_ss_screen_review	UAS_Chrimson_Venus_X_0070	Card	attP40; attP2	Sample#2765029615318597730	f			BJD_SS02612	BJD_SS02612-20200117_44_G5	Drosophila melanogaster	20x	w; VT047755-p65ADZp in attP40; VT003280-ZpGdbd in attP2
SS02617	20200117_44_C2	A01	Wed Feb 05 15:27:11 EST 2020	206287	ditp_ss_screen_review	UAS_Chrimson_Venus_X_0070	Card	attP40; attP2	Sample#2765029612193841250	m			BJD_SS02617	BJD_SS02617-20200117_44_C2	Drosophila melanogaster	20x	w; VT037574-p65ADZp in attP40/CyO::Tb-RFP; VT025598-ZpGdbd in attP2
SS02617	20200117_44_G2	A01	Wed Feb 05 15:27:11 EST 2020	206287	ditp_ss_screen_review	UAS_Chrimson_Venus_X_0070	Card	attP40; attP2	Sample#2765029614903361634	f			BJD_SS02617	BJD_SS02617-20200117_44_G2	Drosophila melanogaster	20x	w; VT037574-p65ADZp in attP40/CyO::Tb-RFP; VT025598-ZpGdbd in attP2
SS02618	20210521_44_D6	A01	Fri Jun 04 12:36:36 EDT 2021	227752	ditp_ss_screen_review	UAS_Chrimson_Venus_X_0070	Card	attP40; attP2	Sample#2940729701448024162	f	Descending Interneuron	Shigehiro Namiki	GMR_SS02618	GMR_SS02618-20210521_44_D6	Drosophila melanogaster	20x	w; 11H10-p65ADZp in attP40; VT040348-ZpGdbd in attP2
SS02618	20210521_44_I6	A01	Fri Jun 04 12:36:37 EDT 2021	227752	ditp_ss_screen_review	UAS_Chrimson_Venus_X_0070	Card	attP40; attP2	Sample#2940729703138328674	m	Descending Interneuron	Shigehiro Namiki	GMR_SS02618	GMR_SS02618-20210521_44_I6	Drosophila melanogaster	20x	w; 11H10-p65ADZp in attP40; VT040348-ZpGdbd in attP2
SS02621	20210521_44_D4	A01	Fri Jun 04 12:36:36 EDT 2021	227750	ditp_ss_screen_review	UAS_Chrimson_Venus_X_0070	Card	attP40; attP2	Sample#2940729701108285538	f	Descending Interneuron	Shigehiro Namiki	GMR_SS02621	GMR_SS02621-20210521_44_D4	Drosophila melanogaster	20x	w; 58E07-p65ADZp in attP40/CyO::Tb-RFP; 30C01-ZpGdbd in attP2
SS02621	20210521_44_I4	A01	Fri Jun 04 12:36:37 EDT 2021	227750	ditp_ss_screen_review	UAS_Chrimson_Venus_X_0070	Card	attP40; attP2	Sample#2940729702836338786	m	Descending Interneuron	Shigehiro Namiki	GMR_SS02621	GMR_SS02621-20210521_44_I4	Drosophila melanogaster	20x	w; 58E07-p65ADZp in attP40/CyO::Tb-RFP; 30C01-ZpGdbd in attP2
SS02623	20220114_45_C2	A01	Wed Jan 26 14:27:06 EST 2022	242815	ditp_ss_screen_review	UAS_Chrimson_Venus_X_0070	Card	attP40; attP2	Sample#3026296143559524450	f	Descending Interneuron	Shigehiro Namiki	BJD_SS02623	BJD_SS02623-20220114_45_C2	Drosophila melanogaster	20x	w; VT016973-p65ADZp in attP40/CyO::Tb-RFP; VT002042-ZpGdbd in attP2
SS02623	20220114_45_D1	A01	Wed Jan 26 14:27:06 EST 2022	242815	ditp_ss_screen_review	UAS_Chrimson_Venus_X_0070	Card	attP40; attP2	Sample#3026296143974760546	m	Descending Interneuron	Shigehiro Namiki	BJD_SS02623	BJD_SS02623-20220114_45_D1	Drosophila melanogaster	20x	w; VT016973-p65ADZp in attP40/CyO::Tb-RFP; VT002042-ZpGdbd in attP2
SS02624	20200117_44_C4	A01	Wed Feb 05 15:27:11 EST 2020	206292	ditp_ss_screen_review	UAS_Chrimson_Venus_X_0070	Card	attP40; attP2	Sample#2765029612483248226	m			BJD_SS02624	BJD_SS02624-20200117_44_C4	Drosophila melanogaster	20x	w; VT023750-p65ADZp in attP40; VT039465-ZpGdbd in attP2
SS02624	20200117_44_G4	A01	Wed Feb 05 15:27:12 EST 2020	206292	ditp_ss_screen_review	UAS_Chrimson_Venus_X_0070	Card	attP40; attP2	Sample#2765029615184380002	f			BJD_SS02624	BJD_SS02624-20200117_44_G4	Drosophila melanogaster	20x	w; VT023750-p65ADZp in attP40; VT039465-ZpGdbd in attP2
SS02625	20200117_44_B2	A01	Wed Feb 05 15:27:11 EST 2020	206294	ditp_ss_screen_review	UAS_Chrimson_Venus_X_0070	Card	attP40; attP2	Sample#2765029611321426018	m			BJD_SS02625	BJD_SS02625-20200117_44_B2	Drosophila melanogaster	20x	w; VT039465-p65ADZp in attP40; VT023750-ZpGdbd in attP2
SS02625	20200117_44_F2	A01	Wed Feb 05 15:27:11 EST 2020	206294	ditp_ss_screen_review	UAS_Chrimson_Venus_X_0070	Card	attP40; attP2	Sample#2765029614043529314	f			BJD_SS02625	BJD_SS02625-20200117_44_F2	Drosophila melanogaster	20x	w; VT039465-p65ADZp in attP40; VT023750-ZpGdbd in attP2
SS02627	20230728_46_F1	A01	Wed Aug 23 13:23:36 EDT 2023	259155	ditp_ss_screen_review	UAS_Chrimson_Venus_X_0070	Card	attP40; attP2	Sample#3234275697774035103	f	DI	DI	BJD_SS02627	BJD_SS02627-20230728_46_F1	Drosophila melanogaster	20x	w; VT042835-p65ADZ in attP40; VT039465-ZpGDBD in attP2
SS02627	20230728_46_G5	A01	Wed Aug 23 13:23:36 EDT 2023	259155	ditp_ss_screen_review	UAS_Chrimson_Venus_X_0070	Card	attP40; attP2	Sample#3234275699044909215	m	DI	DI	BJD_SS02627	BJD_SS02627-20230728_46_G5	Drosophila melanogaster	20x	w; VT042835-p65ADZ in attP40; VT039465-ZpGDBD in attP2
SS02628	20230728_46_F2	A01	Wed Aug 23 13:23:36 EDT 2023	259156	ditp_ss_screen_review	UAS_Chrimson_Venus_X_0070	Card	attP40; attP2	Sample#3234275697895669919	f	DI	DI	BJD_SS02628	BJD_SS02628-20230728_46_F2	Drosophila melanogaster	20x	w; VT007170-p65ADZp in attP40; VT041658-ZpGdbd in attP2/TM6B
SS02628	20230728_46_H3	A01	Wed Aug 23 13:23:36 EDT 2023	259156	ditp_ss_screen_review	UAS_Chrimson_Venus_X_0070	Card	attP40; attP2	Sample#3234275699544031391	m	DI	DI	BJD_SS02628	BJD_SS02628-20230728_46_H3	Drosophila melanogaster	20x	w; VT007170-p65ADZp in attP40; VT041658-ZpGdbd in attP2/TM6B
SS02630	20230728_46_F3	A01	Wed Aug 23 13:23:36 EDT 2023	259157	ditp_ss_screen_review	UAS_Chrimson_Venus_X_0070	Card	attP40; attP2	Sample#3234275698025693343	f	DI	DI	GMR_SS02630	GMR_SS02630-20230728_46_F3	Drosophila melanogaster	20x	w; 19G08-p65ADZp in attP40; VT023750-ZpGDBD in attP2
SS02630	20230728_46_H4	A01	Wed Aug 23 13:23:36 EDT 2023	259157	ditp_ss_screen_review	UAS_Chrimson_Venus_X_0070	Card	attP40; attP2	Sample#3234275699669860511	m	DI	DI	GMR_SS02630	GMR_SS02630-20230728_46_H4	Drosophila melanogaster	20x	w; 19G08-p65ADZp in attP40; VT023750-ZpGDBD in attP2
SS02631	20200724_41_D3	A01	Tue Aug 25 15:21:05 EDT 2020	212767	ditp_ss_screen_review	UAS_Chrimson_Venus_X_0070	Card	attP40; attP2	Sample#2838215328205373538	f			GMR_SS02631	GMR_SS02631-20200724_41_D3	Drosophila melanogaster	20x	w; 20C04-p65ADZp in attP40; VT025999-ZpGdbd in attP2/TM6B
SS02631	20200724_41_E1	A01	Tue Aug 25 15:21:06 EDT 2020	212767	ditp_ss_screen_review	UAS_Chrimson_Venus_X_0070	Card	attP40; attP2	Sample#2838215329987952738	m			GMR_SS02631	GMR_SS02631-20200724_41_E1	Drosophila melanogaster	20x	w; 20C04-p65ADZp in attP40; VT025999-ZpGdbd in attP2/TM6B
SS02634	20200117_44_C6	A01	Wed Feb 05 15:27:11 EST 2020	206290	ditp_ss_screen_review	UAS_Chrimson_Venus_X_0070	Card	attP40; attP2	Sample#2765029612768460898	m			GMR_SS02634	GMR_SS02634-20200117_44_C6	Drosophila melanogaster	20x	w; 42B02-p65ADZp in attP40; VT042835-ZpGdbd in attP2
SS02634	20200117_44_G6	A01	Wed Feb 05 15:27:12 EST 2020	206290	ditp_ss_screen_review	UAS_Chrimson_Venus_X_0070	Card	attP40; attP2	Sample#2765029615461204066	f			GMR_SS02634	GMR_SS02634-20200117_44_G6	Drosophila melanogaster	20x	w; 42B02-p65ADZp in attP40; VT042835-ZpGdbd in attP2
SS02638	20200117_45_B3	A01	Wed Feb 05 14:57:44 EST 2020	206319	nerna_ss_screen_review	UAS_Chrimson_Venus_X_0070	Rubin	attP40; attP2	Sample#2765022199638130786	f			BJD_SS02638	BJD_SS02638-20200117_45_B3	Drosophila melanogaster	20x	w; VT038216-p65ADZp in attP40; VT026477-ZpGdbd in attP2
SS02638	20200117_45_D3	A01	Wed Feb 05 14:57:44 EST 2020	206319	nerna_ss_screen_review	UAS_Chrimson_Venus_X_0070	Rubin	attP40; attP2	Sample#2765022200976113762	m			BJD_SS02638	BJD_SS02638-20200117_45_D3	Drosophila melanogaster	20x	w; VT038216-p65ADZp in attP40; VT026477-ZpGdbd in attP2
SS02645	20191218_45_I4	A01	Wed Jan 22 17:59:37 EST 2020	205409	nerna_ss_screen_review	UAS_Chrimson_Venus_X_0070	Rubin	attP40; attP2	Sample#2759994544270344290	f			BJD_SS02645	BJD_SS02645-20191218_45_I4	Drosophila melanogaster	20x	w; 27704-p65ADZp in attP40/CyO; VT040569-ZpGdbd in attP2/TM6B
SS02645	20191218_46_I4	A01	Wed Jan 22 18:32:08 EST 2020	205409	nerna_ss_screen_review	UAS_Chrimson_Venus_X_0070	Rubin	attP40; attP2	Sample#2760002725801361506	m			BJD_SS02645	BJD_SS02645-20191218_46_I4	Drosophila melanogaster	20x	w; 27704-p65ADZp in attP40/CyO; VT040569-ZpGdbd in attP2/TM6B
SS02650	20200117_45_B4	A01	Wed Feb 05 14:57:44 EST 2020	206320	nerna_ss_screen_review	UAS_Chrimson_Venus_X_0070	Rubin	attP40; attP2	Sample#2765022199772348514	f			BJD_SS02650	BJD_SS02650-20200117_45_B4	Drosophila melanogaster	20x	w; 09792-p65ADZp in attP40/CyO; VT002021-ZpGdbd in attP2/TM6B
SS02650	20200117_45_D4	A01	Wed Feb 05 14:57:44 EST 2020	206320	nerna_ss_screen_review	UAS_Chrimson_Venus_X_0070	Rubin	attP40; attP2	Sample#2765022201110331490	m			BJD_SS02650	BJD_SS02650-20200117_45_D4	Drosophila melanogaster	20x	w; 09792-p65ADZp in attP40/CyO; VT002021-ZpGdbd in attP2/TM6B
SS02651	20200117_45_A3	A01	Wed Feb 05 14:57:43 EST 2020	206321	nerna_ss_screen_review	UAS_Chrimson_Venus_X_0070	Rubin	attP40; attP2	Sample#2765022198820241506	f			BJD_SS02651	BJD_SS02651-20200117_45_A3	Drosophila melanogaster	20x	w; 32961-p65ADZp in attP40/CyO; VT040569-ZpGdbd in attP2/TM6B
SS02651	20200117_45_C3	A01	Wed Feb 05 14:57:44 EST 2020	206321	nerna_ss_screen_review	UAS_Chrimson_Venus_X_0070	Rubin	attP40; attP2	Sample#2765022200179196002	m			BJD_SS02651	BJD_SS02651-20200117_45_C3	Drosophila melanogaster	20x	w; 32961-p65ADZp in attP40/CyO; VT040569-ZpGdbd in attP2/TM6B
SS02652	20191218_45_H6	A01	Wed Jan 22 17:59:37 EST 2020	205411	nerna_ss_screen_review	UAS_Chrimson_Venus_X_0070	Rubin	attP40; attP2	Sample#2759994543364374626	f			BJD_SS02652	BJD_SS02652-20191218_45_H6	Drosophila melanogaster	20x	w; VT032961-p65ADZp in attP40; VT027704-ZpGdbd in attP2
SS02652	20191218_46_H6	A01	Wed Jan 22 18:32:07 EST 2020	205411	nerna_ss_screen_review	UAS_Chrimson_Venus_X_0070	Rubin	attP40; attP2	Sample#2760002724895391842	m			BJD_SS02652	BJD_SS02652-20191218_46_H6	Drosophila melanogaster	20x	w; VT032961-p65ADZp in attP40; VT027704-ZpGdbd in attP2
SS02662	20191218_45_I3	A01	Wed Jan 22 17:59:37 EST 2020	205408	nerna_ss_screen_review	UAS_Chrimson_Venus_X_0070	Rubin	attP40; attP2	Sample#2759994544043851874	f			GMR_SS02662	GMR_SS02662-20191218_45_I3	Drosophila melanogaster	20x	w; 28G03-p65ADZp in attP40/CyO; VT027704-ZpGdbd in attP2/TM6B
SS02662	20191218_46_I3	A01	Wed Jan 22 18:32:08 EST 2020	205408	nerna_ss_screen_review	UAS_Chrimson_Venus_X_0070	Rubin	attP40; attP2	Sample#2760002725570674786	m			GMR_SS02662	GMR_SS02662-20191218_46_I3	Drosophila melanogaster	20x	w; 28G03-p65ADZp in attP40/CyO; VT027704-ZpGdbd in attP2/TM6B
SS02663	20200117_45_A4	A01	Wed Feb 05 14:57:43 EST 2020	206322	nerna_ss_screen_review	UAS_Chrimson_Venus_X_0070	Rubin	attP40; attP2	Sample#2765022198958653538	f			GMR_SS02663	GMR_SS02663-20200117_45_A4	Drosophila melanogaster	20x	w; 35D04-p65ADZp in attP40; VT040747-ZpGdbd in attP2
SS02663	20200117_45_C4	A01	Wed Feb 05 14:57:44 EST 2020	206322	nerna_ss_screen_review	UAS_Chrimson_Venus_X_0070	Rubin	attP40; attP2	Sample#2765022200313413730	m			GMR_SS02663	GMR_SS02663-20200117_45_C4	Drosophila melanogaster	20x	w; 35D04-p65ADZp in attP40; VT040747-ZpGdbd in attP2
SS02664	20230217_45_F4	A01	Mon Feb 27 11:12:07 EST 2023	254222	nerna_ss_screen_review	UAS_Chrimson_Venus_X_0070	Rubin	attP40; attP2	Sample#3170115058898305183	f	Rubin	Aljoscha Nern	GMR_SS02664	GMR_SS02664-20230217_45_F4	Drosophila melanogaster	20x	w; 35D04-p65ADZp in attP40; VT043656-ZpGdbd in attP2
SS02664	20230217_46_F4	A01	Tue Feb 28 11:06:08 EST 2023	254222	nerna_ss_screen_review	UAS_Chrimson_Venus_X_0070	Rubin	attP40; attP2	Sample#3170475937728823455	m	Rubin	Aljoscha Nern	GMR_SS02664	GMR_SS02664-20230217_46_F4	Drosophila melanogaster	20x	w; 35D04-p65ADZp in attP40; VT043656-ZpGdbd in attP2
SS02665	20200117_45_B2	A01	Wed Feb 05 14:57:43 EST 2020	206323	nerna_ss_screen_review	UAS_Chrimson_Venus_X_0070	Rubin	attP40; attP2	Sample#2765022199495524450	f			GMR_SS02665	GMR_SS02665-20200117_45_B2	Drosophila melanogaster	20x	w; 35D04-p65ADZp in attP40; VT058944-ZpGdbd in attP2
SS02665	20200117_45_D2	A01	Wed Feb 05 14:57:44 EST 2020	206323	nerna_ss_screen_review	UAS_Chrimson_Venus_X_0070	Rubin	attP40; attP2	Sample#2765022200841896034	m			GMR_SS02665	GMR_SS02665-20200117_45_D2	Drosophila melanogaster	20x	w; 35D04-p65ADZp in attP40; VT058944-ZpGdbd in attP2
SS02666	20200117_45_A6	A01	Wed Feb 05 14:57:43 EST 2020	206324	nerna_ss_screen_review	UAS_Chrimson_Venus_X_0070	Rubin	attP40; attP2	Sample#2765022199227088994	f			GMR_SS02666	GMR_SS02666-20200117_45_A6	Drosophila melanogaster	20x	w; 35D04-p65ADZp in attP40/CyO; VT045997-ZpGdbd in attP2/TM6B
SS02666	20200117_45_C6	A01	Wed Feb 05 14:57:44 EST 2020	206324	nerna_ss_screen_review	UAS_Chrimson_Venus_X_0070	Rubin	attP40; attP2	Sample#2765022200577654882	m			GMR_SS02666	GMR_SS02666-20200117_45_C6	Drosophila melanogaster	20x	w; 35D04-p65ADZp in attP40/CyO; VT045997-ZpGdbd in attP2/TM6B
SS02669	20191218_45_H5	A01	Wed Jan 22 17:59:37 EST 2020	205410	nerna_ss_screen_review	UAS_Chrimson_Venus_X_0070	Rubin	attP40; attP2	Sample#2759994543137882210	f			GMR_SS02669	GMR_SS02669-20191218_45_H5	Drosophila melanogaster	20x	w; 72C08-p65ADZp in attP40; VT040747-ZpGdbd in attP2
SS02669	20191218_46_H5	A01	Wed Jan 22 18:32:07 EST 2020	205410	nerna_ss_screen_review	UAS_Chrimson_Venus_X_0070	Rubin	attP40; attP2	Sample#2760002724668899426	m			GMR_SS02669	GMR_SS02669-20191218_46_H5	Drosophila melanogaster	20x	w; 72C08-p65ADZp in attP40; VT040747-ZpGdbd in attP2
SS02681	20200117_45_A5	A01	Wed Feb 05 14:57:43 EST 2020	206325	nerna_ss_screen_review	UAS_Chrimson_Venus_X_0070	Rubin	attP40; attP2	Sample#2765022199092871266	f			GMR_SS02681	GMR_SS02681-20200117_45_A5	Drosophila melanogaster	20x	w; VT040747-p65ADZp in attP40; 72C08-ZpGdbd in attP2
SS02681	20200117_45_C5	A01	Wed Feb 05 14:57:44 EST 2020	206325	nerna_ss_screen_review	UAS_Chrimson_Venus_X_0070	Rubin	attP40; attP2	Sample#2765022200443437154	m			GMR_SS02681	GMR_SS02681-20200117_45_C5	Drosophila melanogaster	20x	w; VT040747-p65ADZp in attP40; 72C08-ZpGdbd in attP2
SS02691	20220527_44_C1	A01	Thu Jun 09 09:34:09 EDT 2022	246780	nerna_ss_screen_review	UAS_Chrimson_Venus_X_0070	Rubin	attP40; attP2	Sample#3074767293230612578	f	Rubin	Aljoscha Nern	GMR_SS02691	GMR_SS02691-20220527_44_C1	Drosophila melanogaster	20x	w; VT059225-p65ADZp in attP40/CyOTb; 87D07-ZpGdbd in attP2
SS02691	20220527_44_F1	A01	Thu Jun 09 09:34:09 EDT 2022	246780	nerna_ss_screen_review	UAS_Chrimson_Venus_X_0070	Rubin	attP40; attP2	Sample#3074767295302598754	m	Rubin	Aljoscha Nern	GMR_SS02691	GMR_SS02691-20220527_44_F1	Drosophila melanogaster	20x	w; VT059225-p65ADZp in attP40/CyOTb; 87D07-ZpGdbd in attP2
SS02692	20230224_44_B5	A01	Tue Mar 07 11:36:38 EST 2023	254424	nerna_ss_screen_review	UAS_Chrimson_Venus_X_0070	Rubin	attP40; attP2	Sample#3173020328943157407	f	Rubin	Aljoscha Nern	GMR_SS02692	GMR_SS02692-20230224_44_B5	Drosophila melanogaster	20x	w; VT022010-p65ADZp in attP40/CyOTb; 71F05-ZpGdbd in attP2
SS02692	20230224_45_D5	A01	Wed Mar 08 11:13:15 EST 2023	254424	nerna_ss_screen_review	UAS_Chrimson_Venus_X_0070	Rubin	attP40; attP2	Sample#3173376831688540319	m	Rubin	Aljoscha Nern	GMR_SS02692	GMR_SS02692-20230224_45_D5	Drosophila melanogaster	20x	w; VT022010-p65ADZp in attP40/CyOTb; 71F05-ZpGdbd in attP2
SS02693	20220527_44_C4	A01	Thu Jun 09 09:34:09 EDT 2022	246781	nerna_ss_screen_review	UAS_Chrimson_Venus_X_0070	Rubin	attP40; attP2	Sample#3074767293591322722	f	Rubin	Aljoscha Nern	GMR_SS02693	GMR_SS02693-20220527_44_C4	Drosophila melanogaster	20x	w; VT002026-p65ADZp in attP40/CyOTb; 40E05-ZpGdbd in attP2
SS02693	20220527_44_F4	A01	Thu Jun 09 09:34:09 EDT 2022	246781	nerna_ss_screen_review	UAS_Chrimson_Venus_X_0070	Rubin	attP40; attP2	Sample#3074767295633948770	m	Rubin	Aljoscha Nern	GMR_SS02693	GMR_SS02693-20220527_44_F4	Drosophila melanogaster	20x	w; VT002026-p65ADZp in attP40/CyOTb; 40E05-ZpGdbd in attP2
SS02694	20220610_44_G3	A01	Wed Jun 22 13:38:08 EDT 2022	247188	nerna_ss_screen_review	UAS_Chrimson_Venus_X_0070	Rubin	attP40; attP2	Sample#3079539738974093410	f	Rubin	Aljoscha Nern	GMR_SS02694	GMR_SS02694-20220610_44_G3	Drosophila melanogaster	20x	w; VT013616-p65ADZp in attP40/CyOTb; 47E02-ZpGdbd in attP2
SS02694	20220610_45_E5	A01	Wed Jun 22 13:17:37 EDT 2022	247188	nerna_ss_screen_review	UAS_Chrimson_Venus_X_0070	Rubin	attP40; attP2	Sample#3079534575509045346	m	Rubin	Aljoscha Nern	GMR_SS02694	GMR_SS02694-20220610_45_E5	Drosophila melanogaster	20x	w; VT013616-p65ADZp in attP40/CyOTb; 47E02-ZpGdbd in attP2
SS02699	20210521_44_C2	A01	Fri Jun 04 11:34:36 EDT 2021	227753	nerna_ss_screen_review	UAS_Chrimson_Venus_X_0070	Rubin	attP40; attP2	Sample#2940714095222980706	f	Rubin	Aljoscha Nern	GMR_SS02699	GMR_SS02699-20210521_44_C2	Drosophila melanogaster	20x	w; 76B02-p65ADZp in attP40/CyO::Tb-RFP; 24C04-ZpGdbd in attP2
SS02699	20210521_44_H2	A01	Fri Jun 04 11:34:36 EDT 2021	227753	nerna_ss_screen_review	UAS_Chrimson_Venus_X_0070	Rubin	attP40; attP2	Sample#2940714096217030754	m	Rubin	Aljoscha Nern	GMR_SS02699	GMR_SS02699-20210521_44_H2	Drosophila melanogaster	20x	w; 76B02-p65ADZp in attP40/CyO::Tb-RFP; 24C04-ZpGdbd in attP2
SS02700	20200821_42_C1	A01	Thu Sep 03 13:31:39 EDT 2020	213170	nerna_ss_screen_review	UAS_Chrimson_Venus_X_0070	Rubin	attP40; attP2	Sample#2841449276385525858	f			GMR_SS02700	GMR_SS02700-20200821_42_C1	Drosophila melanogaster	20x	w; 81A05-p65ADZp in attP40/CyO::Tb-RFP; VT043014-ZpGdbd in attP2
SS02700	20200821_42_G1	A01	Thu Sep 03 13:31:40 EDT 2020	213170	nerna_ss_screen_review	UAS_Chrimson_Venus_X_0070	Rubin	attP40; attP2	Sample#2841449284497309794	m			GMR_SS02700	GMR_SS02700-20200821_42_G1	Drosophila melanogaster	20x	w; 81A05-p65ADZp in attP40/CyO::Tb-RFP; VT043014-ZpGdbd in attP2
SS02701	20221111_44_F3	A01	Tue Dec 06 14:03:08 EST 2022	251735	nerna_ss_screen_review	UAS_Chrimson_Venus_X_0070	Rubin	attP40; attP2	Sample#3140079900099084386	f	Rubin	Aljoscha Nern	GMR_SS02701	GMR_SS02701-20221111_44_F3	Drosophila melanogaster	20x	w; 89G09-p65ADZp in attP40/CyOTb; 49C03-ZpGdbd in attP2
SS02701	20221111_45_E3	A01	Wed Nov 30 16:01:38 EST 2022	251735	nerna_ss_screen_review	UAS_Chrimson_Venus_X_0070	Rubin	attP40; attP2	Sample#3137935395036069986	m	Rubin	Aljoscha Nern	GMR_SS02701	GMR_SS02701-20221111_45_E3	Drosophila melanogaster	20x	w; 89G09-p65ADZp in attP40/CyOTb; 49C03-ZpGdbd in attP2
SS02718	20210702_50_B4	A01	Thu Jul 15 15:08:09 EDT 2021	231001	wolfft_ss_screen_review	UAS_Chrimson_Venus_X_0070	Rubin	attP40; attP2	Sample#2955625738897719394	f	Rubin	Tanya Wolff	GMR_SS02718	GMR_SS02718-20210702_50_B4	Drosophila melanogaster	20x	w; VT005529-p65ADZp in attP40; 83D12-ZpGdbd in attP2/TM6B
SS02718	20210702_50_E1	A01	Thu Jul 15 15:08:09 EDT 2021	231001	wolfft_ss_screen_review	UAS_Chrimson_Venus_X_0070	Rubin	attP40; attP2	Sample#2955625739132600418	m	Rubin	Tanya Wolff	GMR_SS02718	GMR_SS02718-20210702_50_E1	Drosophila melanogaster	20x	w; VT005529-p65ADZp in attP40; 83D12-ZpGdbd in attP2/TM6B
SS02752	20220401_46_H4	A01	Thu Apr 14 13:24:06 EDT 2022	245124	wolfft_ss_screen_review	UAS_Chrimson_Venus_X_0070	Rubin	attP40; attP2	Sample#3054531444224295010	f	Rubin	Tanya Wolff	BJD_SS02752	BJD_SS02752-20220401_46_H4	Drosophila melanogaster	20x	w; VT016996-p65ADZp in attP40/CyOTb; VT042767-ZpGDBD in attP2
SS02752	20220401_47_H4	A01	Wed Apr 13 13:23:09 EDT 2022	245124	wolfft_ss_screen_review	UAS_Chrimson_Venus_X_0070	Rubin	attP40; attP2	Sample#3054168818092867682	m	Rubin	Tanya Wolff	BJD_SS02752	BJD_SS02752-20220401_47_H4	Drosophila melanogaster	20x	w; VT016996-p65ADZp in attP40/CyOTb; VT042767-ZpGDBD in attP2
SS02828	20220401_46_I3	A01	Thu Apr 14 13:24:06 EDT 2022	245129	wolfft_ss_screen_review	UAS_Chrimson_Venus_X_0070	Rubin	attP40; attP2	Sample#3054531444773748834	f	Rubin	Tanya Wolff	GMR_SS02828	GMR_SS02828-20220401_46_I3	Drosophila melanogaster	20x	w; VT000605-p65ADZp in attP40; 80H02-ZpGdbd in attP2/TM6B
SS02828	20220401_47_I3	A01	Wed Apr 13 13:23:10 EDT 2022	245129	wolfft_ss_screen_review	UAS_Chrimson_Venus_X_0070	Rubin	attP40; attP2	Sample#3054168818617155682	m	Rubin	Tanya Wolff	GMR_SS02828	GMR_SS02828-20220401_47_I3	Drosophila melanogaster	20x	w; VT000605-p65ADZp in attP40; 80H02-ZpGdbd in attP2/TM6B
SS02857	20220401_46_I2	A01	Thu Apr 14 13:24:06 EDT 2022	245128	wolfft_ss_screen_review	UAS_Chrimson_Venus_X_0070	Rubin	attP40; attP2	Sample#3054531444664696930	f	Rubin	Tanya Wolff	BJD_SS02857	BJD_SS02857-20220401_46_I2	Drosophila melanogaster	20x	w; VT003476-p65ADZp in attP40/CyOTb; VT040589-ZpGDBD in attP2
SS02857	20220401_47_I2	A01	Wed Apr 13 13:23:10 EDT 2022	245128	wolfft_ss_screen_review	UAS_Chrimson_Venus_X_0070	Rubin	attP40; attP2	Sample#3054168818508103778	m	Rubin	Tanya Wolff	BJD_SS02857	BJD_SS02857-20220401_47_I2	Drosophila melanogaster	20x	w; VT003476-p65ADZp in attP40/CyOTb; VT040589-ZpGDBD in attP2
SS02860	20230317_43_D1	A01	Wed Mar 29 15:31:09 EDT 2023	255012	wolfft_ss_screen_review	UAS_Chrimson_Venus_X_0070	Rubin	attP40; attP2	Sample#3181036783492137119	f	Rubin	Tanya Wolff	GMR_SS02860	GMR_SS02860-20230317_43_D1	Drosophila melanogaster	20x	w; VT018767-p65ADZp in attP40; 19C06-ZpGdbd in attP2
SS02860	20230317_44_B3	A01	Thu Mar 30 15:34:39 EDT 2023	255012	wolfft_ss_screen_review	UAS_Chrimson_Venus_X_0070	Rubin	attP40; attP2	Sample#3181400049603051679	m	Rubin	Tanya Wolff	GMR_SS02860	GMR_SS02860-20230317_44_B3	Drosophila melanogaster	20x	w; VT018767-p65ADZp in attP40; 19C06-ZpGdbd in attP2
SS02863	20221111_43_C2	A01	Tue Nov 29 11:55:47 EST 2022	251724	wolfft_ss_screen_review	UAS_Chrimson_Venus_X_0070	Rubin	attP40; attP2	Sample#3137511138250457186	f	Rubin	Tanya Wolff	GMR_SS02863	GMR_SS02863-20221111_43_C2	Drosophila melanogaster	20x	w; VT019069-p65ADZp in attP40/CyOTb; 14F05-ZpGdbd in attP2
SS02863	20221111_43_D6	A01	Tue Nov 29 11:55:47 EST 2022	251724	wolfft_ss_screen_review	UAS_Chrimson_Venus_X_0070	Rubin	attP40; attP2	Sample#3137511139617800290	m	Rubin	Tanya Wolff	GMR_SS02863	GMR_SS02863-20221111_43_D6	Drosophila melanogaster	20x	w; VT019069-p65ADZp in attP40/CyOTb; 14F05-ZpGdbd in attP2
SS02880	20230317_43_D2	A01	Wed Mar 29 15:31:10 EDT 2023	255013	wolfft_ss_screen_review	UAS_Chrimson_Venus_X_0070	Rubin	attP40; attP2	Sample#3181036783605383327	f	Rubin	Tanya Wolff	BJD_SS02880	BJD_SS02880-20230317_43_D2	Drosophila melanogaster	20x	w; VT019718-p65ADZp in attP40/CyOTb; VT014432-ZpGDBD in attP2
SS02880	20230317_44_B4	A01	Thu Mar 30 15:34:39 EDT 2023	255013	wolfft_ss_screen_review	UAS_Chrimson_Venus_X_0070	Rubin	attP40; attP2	Sample#3181400049712103583	m	Rubin	Tanya Wolff	BJD_SS02880	BJD_SS02880-20230317_44_B4	Drosophila melanogaster	20x	w; VT019718-p65ADZp in attP40/CyOTb; VT014432-ZpGDBD in attP2
SS02891	20200117_44_B3	A01	Wed Feb 05 15:27:11 EST 2020	206332	ditp_ss_screen_review	UAS_Chrimson_Venus_X_0070	Card	attP40; attP2	Sample#2765029611468226658	m			BJD_SS02891	BJD_SS02891-20200117_44_B3	Drosophila melanogaster	20x	w; VT025392-p65ADZp in attP40; VT057247-ZpGdbd in attP2
SS02891	20200117_44_F3	A01	Wed Feb 05 15:27:11 EST 2020	206332	ditp_ss_screen_review	UAS_Chrimson_Venus_X_0070	Card	attP40; attP2	Sample#2765029614186135650	f			BJD_SS02891	BJD_SS02891-20200117_44_F3	Drosophila melanogaster	20x	w; VT025392-p65ADZp in attP40; VT057247-ZpGdbd in attP2
SS02916	20230929_41_A3	A01	Fri Oct 20 13:08:05 EDT 2023	260655	wolfft_ss_screen_review	UAS_Chrimson_Venus_X_0070	Rubin	attP40; attP2	Sample#3255290291086688415	f	Rubin	Tanya Wolff	GMR_SS02916	GMR_SS02916-20230929_41_A3	Drosophila melanogaster	20x	w[1118]; P{y[+t7.7] w[+mC]=R49A01-p65.AD}attP40; P{y[+t7.7] w[+mC]=R39H12-GAL4.DBD}attP2
SS02916	20230929_41_C2	A01	Fri Oct 20 13:03:35 EDT 2023	260655	wolfft_ss_screen_review	UAS_Chrimson_Venus_X_0070	Rubin	attP40; attP2	Sample#3255289157592809631	m	Rubin	Tanya Wolff	GMR_SS02916	GMR_SS02916-20230929_41_C2	Drosophila melanogaster	20x	w[1118]; P{y[+t7.7] w[+mC]=R49A01-p65.AD}attP40; P{y[+t7.7] w[+mC]=R39H12-GAL4.DBD}attP2
SS02922	20230317_43_D3	A01	Wed Mar 29 15:31:10 EDT 2023	255014	wolfft_ss_screen_review	UAS_Chrimson_Venus_X_0070	Rubin	attP40; attP2	Sample#3181036783714435231	f	Rubin	Tanya Wolff	GMR_SS02922	GMR_SS02922-20230317_43_D3	Drosophila melanogaster	20x	w; 72E10-p65ADZp in attP40/CyOTb; VT019728-ZpGdbd in attP2
SS02922	20230317_44_B5	A01	Thu Mar 30 15:34:39 EDT 2023	255014	wolfft_ss_screen_review	UAS_Chrimson_Venus_X_0070	Rubin	attP40; attP2	Sample#3181400049821155487	m	Rubin	Tanya Wolff	GMR_SS02922	GMR_SS02922-20230317_44_B5	Drosophila melanogaster	20x	w; 72E10-p65ADZp in attP40/CyOTb; VT019728-ZpGdbd in attP2
SS02929	20230224_44_B6	A01	Tue Mar 07 11:36:38 EST 2023	254425	nerna_ss_screen_review	UAS_Chrimson_Venus_X_0070	Rubin	attP40; attP2	Sample#3173020329068986527	f	Rubin	Aljoscha Nern	BJD_SS02929	BJD_SS02929-20230224_44_B6	Drosophila melanogaster	20x	w; VT004971-p65ADZp in attP40; VT006395-ZpGdbd in attP2
SS02929	20230224_45_D6	A01	Wed Mar 08 11:13:15 EST 2023	254425	nerna_ss_screen_review	UAS_Chrimson_Venus_X_0070	Rubin	attP40; attP2	Sample#3173376831902449823	m	Rubin	Aljoscha Nern	BJD_SS02929	BJD_SS02929-20230224_45_D6	Drosophila melanogaster	20x	w; VT004971-p65ADZp in attP40; VT006395-ZpGdbd in attP2
SS02943	20230224_44_C1	A01	Tue Mar 07 11:36:38 EST 2023	254426	nerna_ss_screen_review	UAS_Chrimson_Venus_X_0070	Rubin	attP40; attP2	Sample#3173020329194815647	f	Rubin	Aljoscha Nern	BJD_SS02943	BJD_SS02943-20230224_44_C1	Drosophila melanogaster	20x	w; VT064562-p65ADZp in attP40; VT001599-ZpGdbd in attP2
SS02943	20230224_45_E1	A01	Wed Mar 08 11:13:15 EST 2023	254426	nerna_ss_screen_review	UAS_Chrimson_Venus_X_0070	Rubin	attP40; attP2	Sample#3173376832112165023	m	Rubin	Aljoscha Nern	BJD_SS02943	BJD_SS02943-20230224_45_E1	Drosophila melanogaster	20x	w; VT064562-p65ADZp in attP40; VT001599-ZpGdbd in attP2
SS02945	20230224_44_C2	A01	Tue Mar 07 11:36:38 EST 2023	254427	nerna_ss_screen_review	UAS_Chrimson_Venus_X_0070	Rubin	attP40; attP2	Sample#3173020329316450463	f	Rubin	Aljoscha Nern	BJD_SS02945	BJD_SS02945-20230224_44_C2	Drosophila melanogaster	20x	w; VT034612-p65ADZp in attP40; VT047755-ZpGdbd in attP2
SS02945	20230224_45_E2	A01	Wed Mar 08 11:13:15 EST 2023	254427	nerna_ss_screen_review	UAS_Chrimson_Venus_X_0070	Rubin	attP40; attP2	Sample#3173376832321880223	m	Rubin	Aljoscha Nern	BJD_SS02945	BJD_SS02945-20230224_45_E2	Drosophila melanogaster	20x	w; VT034612-p65ADZp in attP40; VT047755-ZpGdbd in attP2
SS02950	20230317_43_D4	A01	Wed Mar 29 15:31:10 EDT 2023	255015	wolfft_ss_screen_review	UAS_Chrimson_Venus_X_0070	Rubin	attP40; attP2	Sample#3181036783819292831	f	Rubin	Tanya Wolff	GMR_SS02950	GMR_SS02950-20230317_43_D4	Drosophila melanogaster	20x	w; 33C05-p65ADZp in attP40; 72G07-ZpGdbd in attP2
SS02950	20230317_44_B6	A01	Thu Mar 30 15:34:39 EDT 2023	255015	wolfft_ss_screen_review	UAS_Chrimson_Venus_X_0070	Rubin	attP40; attP2	Sample#3181400049930207391	m	Rubin	Tanya Wolff	GMR_SS02950	GMR_SS02950-20230317_44_B6	Drosophila melanogaster	20x	w; 33C05-p65ADZp in attP40; 72G07-ZpGdbd in attP2
SS02951	20230317_43_D5	A01	Wed Mar 29 15:31:10 EDT 2023	255016	wolfft_ss_screen_review	UAS_Chrimson_Venus_X_0070	Rubin	attP40; attP2	Sample#3181036783924150431	f	Rubin	Tanya Wolff	GMR_SS02951	GMR_SS02951-20230317_43_D5	Drosophila melanogaster	20x	w; 33C05-p65ADZp in attP40; 76E07-ZpGdbd in attP2
SS02951	20230317_44_C1	A01	Thu Mar 30 15:34:39 EDT 2023	255016	wolfft_ss_screen_review	UAS_Chrimson_Venus_X_0070	Rubin	attP40; attP2	Sample#3181400050039259295	m	Rubin	Tanya Wolff	GMR_SS02951	GMR_SS02951-20230317_44_C1	Drosophila melanogaster	20x	w; 33C05-p65ADZp in attP40; 76E07-ZpGdbd in attP2
SS02974	20230224_44_C3	A01	Tue Mar 07 11:36:38 EST 2023	254428	nerna_ss_screen_review	UAS_Chrimson_Venus_X_0070	Rubin	attP40; attP2	Sample#3173020329433890975	f	Rubin	Aljoscha Nern	GMR_SS02974	GMR_SS02974-20230224_44_C3	Drosophila melanogaster	20x	w; 23E11-p65ADZp in attP40/CyOTb; VT049492-ZpGdbd in attP2
SS02974	20230224_45_E3	A01	Wed Mar 08 11:13:15 EST 2023	254428	nerna_ss_screen_review	UAS_Chrimson_Venus_X_0070	Rubin	attP40; attP2	Sample#3173376832527401119	m	Rubin	Aljoscha Nern	GMR_SS02974	GMR_SS02974-20230224_45_E3	Drosophila melanogaster	20x	w; 23E11-p65ADZp in attP40/CyOTb; VT049492-ZpGdbd in attP2
SS02978	20230224_44_C4	A01	Tue Mar 07 11:36:38 EST 2023	254429	nerna_ss_screen_review	UAS_Chrimson_Venus_X_0070	Rubin	attP40; attP2	Sample#3173020329572303007	f	Rubin	Aljoscha Nern	GMR_SS02978	GMR_SS02978-20230224_44_C4	Drosophila melanogaster	20x	w; 42E06-p65ADZp in attP40; VT064564-ZpGdbd in attP2/TM6B
SS02978	20230224_45_E4	A01	Wed Mar 08 11:13:15 EST 2023	254429	nerna_ss_screen_review	UAS_Chrimson_Venus_X_0070	Rubin	attP40; attP2	Sample#3173376832737116319	m	Rubin	Aljoscha Nern	GMR_SS02978	GMR_SS02978-20230224_45_E4	Drosophila melanogaster	20x	w; 42E06-p65ADZp in attP40; VT064564-ZpGdbd in attP2/TM6B
SS02996	20230407_43_A3	A01	Thu Apr 20 14:39:34 EDT 2023	255528	dicksonb_ss_screen_review	UAS_Chrimson_Venus_X_0070	Dickson	attP40; attP2	Sample#3188996334287847583	f	Dickson	Barry Dickson	BJD_SS02996	BJD_SS02996-20230407_43_A3	Drosophila melanogaster	20x	w; VT049125-p65ADZp in attP40; 38B09-ZpGdbd in attP2
SS02996	20230407_43_D1	A01	Thu Apr 20 14:39:35 EDT 2023	255528	dicksonb_ss_screen_review	UAS_Chrimson_Venus_X_0070	Dickson	attP40; attP2	Sample#3188996336103981215	m	Dickson	Barry Dickson	BJD_SS02996	BJD_SS02996-20230407_43_D1	Drosophila melanogaster	20x	w; VT049125-p65ADZp in attP40; 38B09-ZpGdbd in attP2
SS03049	20230331_45_C6	A01	Fri Apr 14 15:20:06 EDT 2023	255490	wangk11_ss_screen_review	UAS_Chrimson_Venus_X_0070	Dickson	attP40; attP2	Sample#3186832207603826847	f	Dickson	Kaiyu Wang	JRC_SS03049	JRC_SS03049-20230331_45_C6	Drosophila melanogaster	20x	w; VT057053-p65ADZp in attP40/CyOTb; VT026992-ZpGDBD in attP2
SS03049	20230331_46_E6	A01	Fri Apr 14 14:58:36 EDT 2023	255490	wangk11_ss_screen_review	UAS_Chrimson_Venus_X_0070	Dickson	attP40; attP2	Sample#3186826796410601631	m	Dickson	Kaiyu Wang	JRC_SS03049	JRC_SS03049-20230331_46_E6	Drosophila melanogaster	20x	w; VT057053-p65ADZp in attP40/CyOTb; VT026992-ZpGDBD in attP2
SS03103	20230407_43_A4	A01	Thu Apr 20 14:39:34 EDT 2023	255529	dicksonb_ss_screen_review	UAS_Chrimson_Venus_X_0070	Dickson	attP40; attP2	Sample#3188996334401093791	f	Dickson	Barry Dickson	JRC_SS03103	JRC_SS03103-20230407_43_A4	Drosophila melanogaster	20x	w; 31H10-p65ADZp in attP40; VT025718-ZpGDBD in attP2/TM6B
SS03103	20230407_43_D2	A01	Thu Apr 20 14:39:35 EDT 2023	255529	dicksonb_ss_screen_review	UAS_Chrimson_Venus_X_0070	Dickson	attP40; attP2	Sample#3188996336213033119	m	Dickson	Barry Dickson	JRC_SS03103	JRC_SS03103-20230407_43_D2	Drosophila melanogaster	20x	w; 31H10-p65ADZp in attP40; VT025718-ZpGDBD in attP2/TM6B
SS03112	20230407_43_A5	A01	Thu Apr 20 14:39:34 EDT 2023	255530	dicksonb_ss_screen_review	UAS_Chrimson_Venus_X_0070	Dickson	attP40; attP2	Sample#3188996334518534303	f	Dickson	Barry Dickson	JRC_SS03112	JRC_SS03112-20230407_43_A5	Drosophila melanogaster	20x	w; 45D07-p65ADZp in attP40/CyOTb; VT027804-ZpGdbd in attP2
SS03112	20230407_43_D3	A01	Thu Apr 20 14:39:35 EDT 2023	255530	dicksonb_ss_screen_review	UAS_Chrimson_Venus_X_0070	Dickson	attP40; attP2	Sample#3188996336317890719	m	Dickson	Barry Dickson	JRC_SS03112	JRC_SS03112-20230407_43_D3	Drosophila melanogaster	20x	w; 45D07-p65ADZp in attP40/CyOTb; VT027804-ZpGdbd in attP2
SS03144	20230224_44_C5	A01	Tue Mar 07 11:36:38 EST 2023	254430	nerna_ss_screen_review	UAS_Chrimson_Venus_X_0070	Rubin	attP40; attP2	Sample#3173020329693937823	f	Rubin	Aljoscha Nern	JRC_SS03144	JRC_SS03144-20230224_44_C5	Drosophila melanogaster	20x	w; VT043086-p65ADZp in attP40; 25D01-ZpGdbd in attP2
SS03144	20230224_45_E5	A01	Wed Mar 08 11:13:15 EST 2023	254430	nerna_ss_screen_review	UAS_Chrimson_Venus_X_0070	Rubin	attP40; attP2	Sample#3173376832946831519	m	Rubin	Aljoscha Nern	JRC_SS03144	JRC_SS03144-20230224_45_E5	Drosophila melanogaster	20x	w; VT043086-p65ADZp in attP40; 25D01-ZpGdbd in attP2
SS03149	20230224_44_C6	A01	Tue Mar 07 11:36:38 EST 2023	254431	nerna_ss_screen_review	UAS_Chrimson_Venus_X_0070	Rubin	attP40; attP2	Sample#3173020329815572639	f	Rubin	Aljoscha Nern	JRC_SS03149	JRC_SS03149-20230224_44_C6	Drosophila melanogaster	20x	w; VT048879-p65ADZp in attP40; VT061931-ZpGDBD in attP2
SS03149	20230224_45_E6	A01	Wed Mar 08 11:13:15 EST 2023	254431	nerna_ss_screen_review	UAS_Chrimson_Venus_X_0070	Rubin	attP40; attP2	Sample#3173376833156546719	m	Rubin	Aljoscha Nern	JRC_SS03149	JRC_SS03149-20230224_45_E6	Drosophila melanogaster	20x	w; VT048879-p65ADZp in attP40; VT061931-ZpGDBD in attP2
SS03151	20230224_44_D1	A01	Tue Mar 07 11:36:38 EST 2023	254432	nerna_ss_screen_review	UAS_Chrimson_Venus_X_0070	Rubin	attP40; attP2	Sample#3173020329937207455	f	Rubin	Aljoscha Nern	JRC_SS03151	JRC_SS03151-20230224_44_D1	Drosophila melanogaster	20x	w; VT039497-p65ADZp in attP40; VT062914-ZpGdbd in attP2
SS03151	20230224_45_F1	A01	Wed Mar 08 11:13:15 EST 2023	254432	nerna_ss_screen_review	UAS_Chrimson_Venus_X_0070	Rubin	attP40; attP2	Sample#3173376833366261919	m	Rubin	Aljoscha Nern	JRC_SS03151	JRC_SS03151-20230224_45_F1	Drosophila melanogaster	20x	w; VT039497-p65ADZp in attP40; VT062914-ZpGdbd in attP2
SS03152	20230224_44_D2	A01	Tue Mar 07 11:36:38 EST 2023	254433	nerna_ss_screen_review	UAS_Chrimson_Venus_X_0070	Rubin	attP40; attP2	Sample#3173020330054647967	f	Rubin	Aljoscha Nern	JRC_SS03152	JRC_SS03152-20230224_44_D2	Drosophila melanogaster	20x	w; VT049363-p65ADZp in attP40; VT047320-ZpGDBD in attP2/TM6B
SS03152	20230224_45_F2	A01	Wed Mar 08 11:13:15 EST 2023	254433	nerna_ss_screen_review	UAS_Chrimson_Venus_X_0070	Rubin	attP40; attP2	Sample#3173376833571782815	m	Rubin	Aljoscha Nern	JRC_SS03152	JRC_SS03152-20230224_45_F2	Drosophila melanogaster	20x	w; VT049363-p65ADZp in attP40; VT047320-ZpGDBD in attP2/TM6B
SS03159	20201218_51_B2	A01	Fri Jan 15 17:22:43 EST 2021	218753	nerna_ss_screen_review	UAS_Chrimson_Venus_X_0070	Rubin	attP40; attP2	Sample#2890082502196592673	f	Rubin	Aljoscha Nern	JRC_SS03159	JRC_SS03159-20201218_51_B2	Drosophila melanogaster	20x	w; VT043162-p65ADZp in attP40; 15C01-ZpGdbd in attP2
SS03159	20201218_51_E2	A01	Fri Jan 15 17:22:40 EST 2021	218753	nerna_ss_screen_review	UAS_Chrimson_Venus_X_0070	Rubin	attP40; attP2	Sample#2890082487914987553	m	Rubin	Aljoscha Nern	JRC_SS03159	JRC_SS03159-20201218_51_E2	Drosophila melanogaster	20x	w; VT043162-p65ADZp in attP40; 15C01-ZpGdbd in attP2
SS03162	20230224_44_D3	A01	Tue Mar 07 11:36:38 EST 2023	254434	nerna_ss_screen_review	UAS_Chrimson_Venus_X_0070	Rubin	attP40; attP2	Sample#3173020330172088479	f	Rubin	Aljoscha Nern	JRC_SS03162	JRC_SS03162-20230224_44_D3	Drosophila melanogaster	20x	w; VT062637-p65ADZp in attP40/CyOTb; VT049372-ZpGdbd in attP2
SS03162	20230224_45_F3	A01	Wed Mar 08 11:13:15 EST 2023	254434	nerna_ss_screen_review	UAS_Chrimson_Venus_X_0070	Rubin	attP40; attP2	Sample#3173376833777303711	m	Rubin	Aljoscha Nern	JRC_SS03162	JRC_SS03162-20230224_45_F3	Drosophila melanogaster	20x	w; VT062637-p65ADZp in attP40/CyOTb; VT049372-ZpGdbd in attP2
SS03163	20230224_44_D4	A01	Tue Mar 07 11:36:38 EST 2023	254435	nerna_ss_screen_review	UAS_Chrimson_Venus_X_0070	Rubin	attP40; attP2	Sample#3173020330285334687	f	Rubin	Aljoscha Nern	JRC_SS03163	JRC_SS03163-20230224_44_D4	Drosophila melanogaster	20x	w; VT000927-p65ADZp in attP40/CyOTb; VT016795-ZpGdbd in attP2
SS03163	20230224_45_F4	A01	Wed Mar 08 11:13:15 EST 2023	254435	nerna_ss_screen_review	UAS_Chrimson_Venus_X_0070	Rubin	attP40; attP2	Sample#3173376833982824607	m	Rubin	Aljoscha Nern	JRC_SS03163	JRC_SS03163-20230224_45_F4	Drosophila melanogaster	20x	w; VT000927-p65ADZp in attP40/CyOTb; VT016795-ZpGdbd in attP2
SS03166	20220610_44_D5	A01	Wed Jun 22 13:38:08 EDT 2022	247202	nerna_ss_screen_review	UAS_Chrimson_Venus_X_0070	Rubin	attP40; attP2	Sample#3079539736944050274	f	Rubin	Aljoscha Nern	JRC_SS03166	JRC_SS03166-20220610_44_D5	Drosophila melanogaster	20x	w; VT062914-p65ADZp in attP40/CyOTb; VT017116-ZpGdbd in attP2
SS03166	20220610_45_C1	A01	Wed Jun 22 13:17:37 EDT 2022	247202	nerna_ss_screen_review	UAS_Chrimson_Venus_X_0070	Rubin	attP40; attP2	Sample#3079534573466419298	m	Rubin	Aljoscha Nern	JRC_SS03166	JRC_SS03166-20220610_45_C1	Drosophila melanogaster	20x	w; VT062914-p65ADZp in attP40/CyOTb; VT017116-ZpGdbd in attP2
SS03168	20230224_44_H3	A01	Tue Mar 07 11:36:39 EST 2023	254436	nerna_ss_screen_review	UAS_Chrimson_Venus_X_0070	Rubin	attP40; attP2	Sample#3173020333003243679	f	Rubin	Aljoscha Nern	JRC_SS03168	JRC_SS03168-20230224_44_H3	Drosophila melanogaster	20x	w; VT002856-p65ADZp in attP40/CyOTb; VT047320-ZpGDBD in attP2/TM6B
SS03168	20230224_45_F5	A01	Wed Mar 08 11:13:15 EST 2023	254436	nerna_ss_screen_review	UAS_Chrimson_Venus_X_0070	Rubin	attP40; attP2	Sample#3173376834192539807	m	Rubin	Aljoscha Nern	JRC_SS03168	JRC_SS03168-20230224_45_F5	Drosophila melanogaster	20x	w; VT002856-p65ADZp in attP40/CyOTb; VT047320-ZpGDBD in attP2/TM6B
SS03173	20220422_45_B3	A01	Thu May 05 12:45:07 EDT 2022	245674	nerna_ss_screen_review	UAS_Chrimson_Venus_X_0070	Rubin	attP40; attP2	Sample#3062131779667230818	f	Rubin	Aljoscha Nern	JRC_SS03173	JRC_SS03173-20220422_45_B3	Drosophila melanogaster	20x	w; VT016988-p65ADZp in attP40; VT019345-ZpGdbd in attP2/TM6B
SS03173	20220422_46_B3	A01	Thu May 05 15:45:07 EDT 2022	245674	nerna_ss_screen_review	UAS_Chrimson_Venus_X_0070	Rubin	attP40; attP2	Sample#3062177077240266850	m	Rubin	Aljoscha Nern	JRC_SS03173	JRC_SS03173-20220422_46_B3	Drosophila melanogaster	20x	w; VT016988-p65ADZp in attP40; VT019345-ZpGdbd in attP2/TM6B
SS03175	20230224_44_H4	A01	Tue Mar 07 11:36:39 EST 2023	254437	nerna_ss_screen_review	UAS_Chrimson_Venus_X_0070	Rubin	attP40; attP2	Sample#3173020333120684191	f	Rubin	Aljoscha Nern	JRC_SS03175	JRC_SS03175-20230224_44_H4	Drosophila melanogaster	20x	w; VT006395-p65ADZp in attP40; VT004971-ZpGdbd in attP2
SS03175	20230224_45_F6	A01	Wed Mar 08 11:13:15 EST 2023	254437	nerna_ss_screen_review	UAS_Chrimson_Venus_X_0070	Rubin	attP40; attP2	Sample#3173376834398060703	m	Rubin	Aljoscha Nern	JRC_SS03175	JRC_SS03175-20230224_45_F6	Drosophila melanogaster	20x	w; VT006395-p65ADZp in attP40; VT004971-ZpGdbd in attP2
SS03186	20220610_44_F1	A01	Wed Jun 22 13:38:08 EDT 2022	247180	nerna_ss_screen_review	UAS_Chrimson_Venus_X_0070	Rubin	attP40; attP2	Sample#3079539737967460450	f	Rubin	Aljoscha Nern	JRC_SS03186	JRC_SS03186-20220610_44_F1	Drosophila melanogaster	20x	w; 51F11-p65ADZp in attP40/CyOTb; VT020600-ZpGdbd in attP2
SS03186	20220610_45_D3	A01	Wed Jun 22 12:51:36 EDT 2022	247180	nerna_ss_screen_review	UAS_Chrimson_Venus_X_0070	Rubin	attP40; attP2	Sample#3079528025574867042	m	Rubin	Aljoscha Nern	JRC_SS03186	JRC_SS03186-20220610_45_D3	Drosophila melanogaster	20x	w; 51F11-p65ADZp in attP40/CyOTb; VT020600-ZpGdbd in attP2
SS03188	20220610_44_E6	A01	Wed Jun 22 13:38:08 EDT 2022	247179	nerna_ss_screen_review	UAS_Chrimson_Venus_X_0070	Rubin	attP40; attP2	Sample#3079539737841631330	f	Rubin	Aljoscha Nern	JRC_SS03188	JRC_SS03188-20220610_44_E6	Drosophila melanogaster	20x	w; 54E05-p65ADZp in attP40; VT029577-ZpGdbd in attP2
SS03188	20220610_45_D2	A01	Wed Jun 22 13:17:37 EDT 2022	247179	nerna_ss_screen_review	UAS_Chrimson_Venus_X_0070	Rubin	attP40; attP2	Sample#3079534574439497826	m	Rubin	Aljoscha Nern	JRC_SS03188	JRC_SS03188-20220610_45_D2	Drosophila melanogaster	20x	w; 54E05-p65ADZp in attP40; VT029577-ZpGdbd in attP2
SS03190	20230224_44_H6	A01	Tue Mar 07 11:36:39 EST 2023	254439	nerna_ss_screen_review	UAS_Chrimson_Venus_X_0070	Rubin	attP40; attP2	Sample#3173020333359759519	f	Rubin	Aljoscha Nern	JRC_SS03190	JRC_SS03190-20230224_44_H6	Drosophila melanogaster	20x	w; 65A12-p65ADZp in attP40/CyOTb; VT029577-ZpGdbd in attP2
SS03190	20230224_45_G2	A01	Wed Mar 08 11:13:15 EST 2023	254439	nerna_ss_screen_review	UAS_Chrimson_Venus_X_0070	Rubin	attP40; attP2	Sample#3173376834813296799	m	Rubin	Aljoscha Nern	JRC_SS03190	JRC_SS03190-20230224_45_G2	Drosophila melanogaster	20x	w; 65A12-p65ADZp in attP40/CyOTb; VT029577-ZpGdbd in attP2
SS03193	20230224_44_I1	A01	Tue Mar 07 11:36:39 EST 2023	254440	nerna_ss_screen_review	UAS_Chrimson_Venus_X_0070	Rubin	attP40; attP2	Sample#3173020333477200031	f	Rubin	Aljoscha Nern	JRC_SS03193	JRC_SS03193-20230224_44_I1	Drosophila melanogaster	20x	w; 93A05-p65ADZp in attP40; VT058437-ZpGDBD in attP2
SS03193	20230224_45_G3	A01	Wed Mar 08 11:13:15 EST 2023	254440	nerna_ss_screen_review	UAS_Chrimson_Venus_X_0070	Rubin	attP40; attP2	Sample#3173376835023011999	m	Rubin	Aljoscha Nern	JRC_SS03193	JRC_SS03193-20230224_45_G3	Drosophila melanogaster	20x	w; 93A05-p65ADZp in attP40; VT058437-ZpGDBD in attP2
SS03283	20230331_45_D1	A01	Fri Apr 14 15:20:06 EDT 2023	255492	wangk11_ss_screen_review	UAS_Chrimson_Venus_X_0070	Rubin	attP40; attP2	Sample#3186832207721267359	f	Dickson	Kaiyu Wang	JRC_SS03283	JRC_SS03283-20230331_45_D1	Drosophila melanogaster	20x	w; VT019018-p65ADZp in attP40; 19F09-ZpGdbd in attP2
SS03283	20230331_46_F1	A01	Fri Apr 14 14:58:36 EDT 2023	255492	wangk11_ss_screen_review	UAS_Chrimson_Venus_X_0070	Rubin	attP40; attP2	Sample#3186826796532236447	m	Dickson	Kaiyu Wang	JRC_SS03283	JRC_SS03283-20230331_46_F1	Drosophila melanogaster	20x	w; VT019018-p65ADZp in attP40; 19F09-ZpGdbd in attP2
SS03326	20230407_43_A6	A01	Thu Apr 20 14:39:34 EDT 2023	255531	dicksonb_ss_screen_review	UAS_Chrimson_Venus_X_0070	Dickson	attP40; attP2	Sample#3188996334631780511	f	Dickson	Barry Dickson	JRC_SS03326	JRC_SS03326-20230407_43_A6	Drosophila melanogaster	20x	w; VT059450-p65ADZp in attP40/CyOTb; 47D05-ZpGdbd in attP2
SS03326	20230407_43_D4	A01	Thu Apr 20 14:39:35 EDT 2023	255531	dicksonb_ss_screen_review	UAS_Chrimson_Venus_X_0070	Dickson	attP40; attP2	Sample#3188996336426942623	m	Dickson	Barry Dickson	JRC_SS03326	JRC_SS03326-20230407_43_D4	Drosophila melanogaster	20x	w; VT059450-p65ADZp in attP40/CyOTb; 47D05-ZpGdbd in attP2
SS03365	20230407_43_B1	A01	Thu Apr 20 14:39:34 EDT 2023	255532	dicksonb_ss_screen_review	UAS_Chrimson_Venus_X_0070	Dickson	attP40; attP2	Sample#3188996334749221023	f	Dickson	Barry Dickson	JRC_SS03365	JRC_SS03365-20230407_43_B1	Drosophila melanogaster	20x	w; VT048418-p65ADZp in attP40/CyOTb; 17B02-ZpGdbd in attP2
SS03365	20230407_43_D5	A01	Thu Apr 20 14:39:35 EDT 2023	255532	dicksonb_ss_screen_review	UAS_Chrimson_Venus_X_0070	Dickson	attP40; attP2	Sample#3188996336540188831	m	Dickson	Barry Dickson	JRC_SS03365	JRC_SS03365-20230407_43_D5	Drosophila melanogaster	20x	w; VT048418-p65ADZp in attP40/CyOTb; 17B02-ZpGdbd in attP2
SS03558	20230407_43_B2	A01	Thu Apr 20 14:39:34 EDT 2023	255533	dicksonb_ss_screen_review	UAS_Chrimson_Venus_X_0070	Dickson	attP40; attP2	Sample#3188996334870855839	f	Dickson	Barry Dickson	JRC_SS03558	JRC_SS03558-20230407_43_B2	Drosophila melanogaster	20x	w; VT056375-p65ADZp in attP40/CyOTb; VT025805-ZpGDBD in attP2
SS03558	20230407_43_D6	A01	Thu Apr 20 14:39:35 EDT 2023	255533	dicksonb_ss_screen_review	UAS_Chrimson_Venus_X_0070	Dickson	attP40; attP2	Sample#3188996336649240735	m	Dickson	Barry Dickson	JRC_SS03558	JRC_SS03558-20230407_43_D6	Drosophila melanogaster	20x	w; VT056375-p65ADZp in attP40/CyOTb; VT025805-ZpGDBD in attP2
SS03563	20230407_43_B3	A01	Thu Apr 20 14:39:34 EDT 2023	255534	dicksonb_ss_screen_review	UAS_Chrimson_Venus_X_0070	Dickson	attP40; attP2	Sample#3188996334984102047	f	Dickson	Barry Dickson	JRC_SS03563	JRC_SS03563-20230407_43_B3	Drosophila melanogaster	20x	w; VT056375-p65ADZp in attP40/CyOTb; VT000767-ZpGdbd in attP2
SS03563	20230407_43_E1	A01	Thu Apr 20 14:39:35 EDT 2023	255534	dicksonb_ss_screen_review	UAS_Chrimson_Venus_X_0070	Dickson	attP40; attP2	Sample#3188996336758292639	m	Dickson	Barry Dickson	JRC_SS03563	JRC_SS03563-20230407_43_E1	Drosophila melanogaster	20x	w; VT056375-p65ADZp in attP40/CyOTb; VT000767-ZpGdbd in attP2
SS03573	20230407_43_B4	A01	Thu Apr 20 14:39:34 EDT 2023	255535	dicksonb_ss_screen_review	UAS_Chrimson_Venus_X_0070	Dickson	attP40; attP2	Sample#3188996335122514079	f	Dickson	Barry Dickson	JRC_SS03573	JRC_SS03573-20230407_43_B4	Drosophila melanogaster	20x	w; VT044982-p65ADZp in attP40/CyOTb; VT010664-ZpGdbd in attP2
SS03573	20230407_43_E2	A01	Thu Apr 20 14:39:35 EDT 2023	255535	dicksonb_ss_screen_review	UAS_Chrimson_Venus_X_0070	Dickson	attP40; attP2	Sample#3188996336871538847	m	Dickson	Barry Dickson	JRC_SS03573	JRC_SS03573-20230407_43_E2	Drosophila melanogaster	20x	w; VT044982-p65ADZp in attP40/CyOTb; VT010664-ZpGdbd in attP2
SS03575	20230407_43_B5	A01	Thu Apr 20 14:39:35 EDT 2023	255536	dicksonb_ss_screen_review	UAS_Chrimson_Venus_X_0070	Dickson	attP40; attP2	Sample#3188996335231565983	f	Dickson	Barry Dickson	JRC_SS03575	JRC_SS03575-20230407_43_B5	Drosophila melanogaster	20x	w; VT046081-p65ADZp in attP40; 55C09-ZpGdbd in attP2
SS03575	20230407_43_E3	A01	Thu Apr 20 14:39:35 EDT 2023	255536	dicksonb_ss_screen_review	UAS_Chrimson_Venus_X_0070	Dickson	attP40; attP2	Sample#3188996336984785055	m	Dickson	Barry Dickson	JRC_SS03575	JRC_SS03575-20230407_43_E3	Drosophila melanogaster	20x	w; VT046081-p65ADZp in attP40; 55C09-ZpGdbd in attP2
SS03627	20230407_43_B6	A01	Thu Apr 20 14:39:35 EDT 2023	255537	dicksonb_ss_screen_review	UAS_Chrimson_Venus_X_0070	Dickson	attP40; attP2	Sample#3188996335344812191	f	Dickson	Barry Dickson	JRC_SS03627	JRC_SS03627-20230407_43_B6	Drosophila melanogaster	20x	w; 94D12-p65ADZp in attP40/CyOTb; 11B07-ZpGdbd in attP2
SS03627	20230407_43_E4	A01	Thu Apr 20 14:39:35 EDT 2023	255537	dicksonb_ss_screen_review	UAS_Chrimson_Venus_X_0070	Dickson	attP40; attP2	Sample#3188996337135779999	m	Dickson	Barry Dickson	JRC_SS03627	JRC_SS03627-20230407_43_E4	Drosophila melanogaster	20x	w; 94D12-p65ADZp in attP40/CyOTb; 11B07-ZpGdbd in attP2
SS03640	20230224_44_I2	A01	Tue Mar 07 11:36:39 EST 2023	254441	nerna_ss_screen_review	UAS_Chrimson_Venus_X_0070	Rubin	attP40; attP2	Sample#3173020333598834847	f	Rubin	Aljoscha Nern	JRC_SS03640	JRC_SS03640-20230224_44_I2	Drosophila melanogaster	20x	w; VT043086-p65ADZp in attP40; 41A08-ZpGdbd in attP2
SS03640	20230224_45_G4	A01	Wed Mar 08 11:13:16 EST 2023	254441	nerna_ss_screen_review	UAS_Chrimson_Venus_X_0070	Rubin	attP40; attP2	Sample#3173376835232727199	m	Rubin	Aljoscha Nern	JRC_SS03640	JRC_SS03640-20230224_45_G4	Drosophila melanogaster	20x	w; VT043086-p65ADZp in attP40; 41A08-ZpGdbd in attP2
SS03641	20210312_42_A2	A01	Fri Apr 09 17:41:43 EDT 2021	222102	nerna_ss_screen_review	UAS_Chrimson_Venus_X_0070	Rubin	attP40; attP2	Sample#2920512766240358498	f	Rubin	Aljoscha Nern	JRC_SS03641	JRC_SS03641-20210312_42_A2	Drosophila melanogaster	20x	w; VT064569-p65ADZp in attP40; 25D01-ZpGdbd in attP2
SS03641	20210312_42_B5	A01	Fri Apr 09 17:41:44 EDT 2021	222102	nerna_ss_screen_review	UAS_Chrimson_Venus_X_0070	Rubin	attP40; attP2	Sample#2920512767758696546	m	Rubin	Aljoscha Nern	JRC_SS03641	JRC_SS03641-20210312_42_B5	Drosophila melanogaster	20x	w; VT064569-p65ADZp in attP40; 25D01-ZpGdbd in attP2
SS03644	20220422_45_D3	A01	Thu May 05 12:45:08 EDT 2022	245686	nerna_ss_screen_review	UAS_Chrimson_Venus_X_0070	Rubin	attP40; attP2	Sample#3062131780673863778	f	Rubin	Aljoscha Nern	JRC_SS03644	JRC_SS03644-20220422_45_D3	Drosophila melanogaster	20x	w; VT008149-p65ADZp in attP40; 22A12-ZpGdbd in attP2/TM6B
SS03644	20220422_46_D3	A01	Thu May 05 15:45:08 EDT 2022	245686	nerna_ss_screen_review	UAS_Chrimson_Venus_X_0070	Rubin	attP40; attP2	Sample#3062177078506946658	m	Rubin	Aljoscha Nern	JRC_SS03644	JRC_SS03644-20220422_46_D3	Drosophila melanogaster	20x	w; VT008149-p65ADZp in attP40; 22A12-ZpGdbd in attP2/TM6B
SS03656	20200821_42_A5	A01	Thu Sep 03 13:31:38 EDT 2020	213172	nerna_ss_screen_review	UAS_Chrimson_Venus_X_0070	Rubin	attP40; attP2	Sample#2841449273344655458	f			JRC_SS03656	JRC_SS03656-20200821_42_A5	Drosophila melanogaster	20x	w; VT061221-p65ADZp in attP40; VT045575-ZpGdbd in attP2
SS03656	20200821_42_E5	A01	Thu Sep 03 13:31:40 EDT 2020	213172	nerna_ss_screen_review	UAS_Chrimson_Venus_X_0070	Rubin	attP40; attP2	Sample#2841449281951367266	m			JRC_SS03656	JRC_SS03656-20200821_42_E5	Drosophila melanogaster	20x	w; VT061221-p65ADZp in attP40; VT045575-ZpGdbd in attP2
SS03658	20220422_45_H4	A01	Thu May 05 12:45:08 EDT 2022	245694	nerna_ss_screen_review	UAS_Chrimson_Venus_X_0070	Rubin	attP40; attP2	Sample#3062131783429521506	f	Rubin	Aljoscha Nern	JRC_SS03658	JRC_SS03658-20220422_45_H4	Drosophila melanogaster	20x	w; VT027323-p65ADZp in attP40; VT008675-ZpGdbd in attP2
SS03658	20220422_46_H4	A01	Thu May 05 15:43:37 EDT 2022	245694	nerna_ss_screen_review	UAS_Chrimson_Venus_X_0070	Rubin	attP40; attP2	Sample#3062176699052458082	m	Rubin	Aljoscha Nern	JRC_SS03658	JRC_SS03658-20220422_46_H4	Drosophila melanogaster	20x	w; VT027323-p65ADZp in attP40; VT008675-ZpGdbd in attP2
SS03659	20230224_44_I3	A01	Tue Mar 07 11:36:39 EST 2023	254442	nerna_ss_screen_review	UAS_Chrimson_Venus_X_0070	Rubin	attP40; attP2	Sample#3173020333712081055	f	Rubin	Aljoscha Nern	JRC_SS03659	JRC_SS03659-20230224_44_I3	Drosophila melanogaster	20x	w; VT010661-p65ADZp in attP40; VT008489-ZpGDBD in attP2/TM6B
SS03659	20230224_46_C1	A01	Wed Mar 08 16:29:07 EST 2023	254442	nerna_ss_screen_review	UAS_Chrimson_Venus_X_0070	Rubin	attP40; attP2	Sample#3173456322632876191	m	Rubin	Aljoscha Nern	JRC_SS03659	JRC_SS03659-20230224_46_C1	Drosophila melanogaster	20x	w; VT010661-p65ADZp in attP40; VT008489-ZpGDBD in attP2/TM6B
SS03679	20230224_44_I4	A01	Tue Mar 07 11:36:39 EST 2023	254443	nerna_ss_screen_review	UAS_Chrimson_Venus_X_0070	Rubin	attP40; attP2	Sample#3173020333829521567	f	Rubin	Aljoscha Nern	JRC_SS03679	JRC_SS03679-20230224_44_I4	Drosophila melanogaster	20x	w; 20D01-p65ADZp in attP40; VT061221-ZpGDBD in attP2/TM6B
SS03679	20230224_46_C2	A01	Wed Mar 08 16:29:07 EST 2023	254443	nerna_ss_screen_review	UAS_Chrimson_Venus_X_0070	Rubin	attP40; attP2	Sample#3173456322733539487	m	Rubin	Aljoscha Nern	JRC_SS03679	JRC_SS03679-20230224_46_C2	Drosophila melanogaster	20x	w; 20D01-p65ADZp in attP40; VT061221-ZpGDBD in attP2/TM6B
SS03689	20220422_45_H5	A01	Thu May 05 12:45:08 EDT 2022	245695	nerna_ss_screen_review	UAS_Chrimson_Venus_X_0070	Rubin	attP40; attP2	Sample#3062131783538573410	f	Rubin	Aljoscha Nern	JRC_SS03689	JRC_SS03689-20220422_45_H5	Drosophila melanogaster	20x	w; 22D12-p65ADZp in attP40; 31C03-ZpGdbd in attP2
SS03689	20220422_45_I3	A01	Thu May 05 12:45:08 EDT 2022	245695	nerna_ss_screen_review	UAS_Chrimson_Venus_X_0070	Rubin	attP40; attP2	Sample#3062131783999946850	m	Rubin	Aljoscha Nern	JRC_SS03689	JRC_SS03689-20220422_45_I3	Drosophila melanogaster	20x	w; 22D12-p65ADZp in attP40; 31C03-ZpGdbd in attP2
SS03690	20210521_44_C3	A01	Fri Jun 04 11:34:36 EDT 2021	227757	nerna_ss_screen_review	UAS_Chrimson_Venus_X_0070	Rubin	attP40; attP2	Sample#2940714095365587042	f	Rubin	Aljoscha Nern	JRC_SS03690	JRC_SS03690-20210521_44_C3	Drosophila melanogaster	20x	w; 22D12-p65ADZp in attP40; 72G03-ZpGdbd in attP2
SS03690	20210521_44_H3	A01	Fri Jun 04 11:34:36 EDT 2021	227757	nerna_ss_screen_review	UAS_Chrimson_Venus_X_0070	Rubin	attP40; attP2	Sample#2940714096355442786	m	Rubin	Aljoscha Nern	JRC_SS03690	JRC_SS03690-20210521_44_H3	Drosophila melanogaster	20x	w; 22D12-p65ADZp in attP40; 72G03-ZpGdbd in attP2
SS03696	20230224_44_I5	A01	Tue Mar 07 11:36:39 EST 2023	254444	nerna_ss_screen_review	UAS_Chrimson_Venus_X_0070	Rubin	attP40; attP2	Sample#3173020333946962079	f	Rubin	Aljoscha Nern	JRC_SS03696	JRC_SS03696-20230224_44_I5	Drosophila melanogaster	20x	w; 40F12-p65ADZp in attP40/CyO,Tb; VT027316-ZpGdbd in attP2
SS03696	20230224_46_C3	A01	Wed Mar 08 16:29:07 EST 2023	254444	nerna_ss_screen_review	UAS_Chrimson_Venus_X_0070	Rubin	attP40; attP2	Sample#3173456322842591391	m	Rubin	Aljoscha Nern	JRC_SS03696	JRC_SS03696-20230224_46_C3	Drosophila melanogaster	20x	w; 40F12-p65ADZp in attP40/CyO,Tb; VT027316-ZpGdbd in attP2
SS03704	20230224_44_I6	A01	Tue Mar 07 11:36:39 EST 2023	254445	nerna_ss_screen_review	UAS_Chrimson_Venus_X_0070	Rubin	attP40; attP2	Sample#3173020334060208287	f	Rubin	Aljoscha Nern	JRC_SS03704	JRC_SS03704-20230224_44_I6	Drosophila melanogaster	20x	w; 72G03-p65ADZp in attP40; 22D12-ZpGdbd in attP2
SS03704	20230224_46_C4	A01	Wed Mar 08 16:29:07 EST 2023	254445	nerna_ss_screen_review	UAS_Chrimson_Venus_X_0070	Rubin	attP40; attP2	Sample#3173456322947448991	m	Rubin	Aljoscha Nern	JRC_SS03704	JRC_SS03704-20230224_46_C4	Drosophila melanogaster	20x	w; 72G03-p65ADZp in attP40; 22D12-ZpGdbd in attP2
SS03711	20230224_44_A1	A01	Tue Mar 07 11:36:37 EST 2023	254446	nerna_ss_screen_review	UAS_Chrimson_Venus_X_0070	Rubin	attP40; attP2	Sample#3173020327672283295	f	Rubin	Aljoscha Nern	JRC_SS03711	JRC_SS03711-20230224_44_A1	Drosophila melanogaster	20x	w; VT026647-p65ADZp in attP40; VT034811-ZpGdbd in attP2
SS03711	20230224_45_C1	A01	Wed Mar 08 11:13:14 EST 2023	254446	nerna_ss_screen_review	UAS_Chrimson_Venus_X_0070	Rubin	attP40; attP2	Sample#3173376829507502239	m	Rubin	Aljoscha Nern	JRC_SS03711	JRC_SS03711-20230224_45_C1	Drosophila melanogaster	20x	w; VT026647-p65ADZp in attP40; VT034811-ZpGdbd in attP2
SS03713	20230224_44_A2	A01	Tue Mar 07 11:36:38 EST 2023	254447	nerna_ss_screen_review	UAS_Chrimson_Venus_X_0070	Rubin	attP40; attP2	Sample#3173020327861026975	f	Rubin	Aljoscha Nern	JRC_SS03713	JRC_SS03713-20230224_44_A2	Drosophila melanogaster	20x	w; VT029317-p65ADZp in attP40/CyOTb; VT008678-ZpGdbd in attP2
SS03713	20230224_45_C2	A01	Wed Mar 08 11:13:14 EST 2023	254447	nerna_ss_screen_review	UAS_Chrimson_Venus_X_0070	Rubin	attP40; attP2	Sample#3173376829725606047	m	Rubin	Aljoscha Nern	JRC_SS03713	JRC_SS03713-20230224_45_C2	Drosophila melanogaster	20x	w; VT029317-p65ADZp in attP40/CyOTb; VT008678-ZpGdbd in attP2
SS03719	20230224_44_A3	A01	Tue Mar 07 11:36:38 EST 2023	254448	nerna_ss_screen_review	UAS_Chrimson_Venus_X_0070	Rubin	attP40; attP2	Sample#3173020328003633311	f	Rubin	Aljoscha Nern	JRC_SS03719	JRC_SS03719-20230224_44_A3	Drosophila melanogaster	20x	w; VT025797-p65ADZp in attP40; VT008678-ZpGdbd in attP2/TM6B
SS03719	20230224_45_C3	A01	Wed Mar 08 11:13:14 EST 2023	254448	nerna_ss_screen_review	UAS_Chrimson_Venus_X_0070	Rubin	attP40; attP2	Sample#3173376829943709855	m	Rubin	Aljoscha Nern	JRC_SS03719	JRC_SS03719-20230224_45_C3	Drosophila melanogaster	20x	w; VT025797-p65ADZp in attP40; VT008678-ZpGdbd in attP2/TM6B
SS03722	20221111_44_F5	A01	Tue Dec 06 14:03:08 EST 2022	251738	nerna_ss_screen_review	UAS_Chrimson_Venus_X_0070	Rubin	attP40; attP2	Sample#3140079900321382498	f	Rubin	Aljoscha Nern	JRC_SS03722	JRC_SS03722-20221111_44_F5	Drosophila melanogaster	20x	w; VT031495-p65ADZp in attP40; 94H07-ZpGdbd in attP2/TM6B
SS03722	20221111_45_E5	A01	Wed Nov 30 16:01:38 EST 2022	251738	nerna_ss_screen_review	UAS_Chrimson_Venus_X_0070	Rubin	attP40; attP2	Sample#3137935395258368098	m	Rubin	Aljoscha Nern	JRC_SS03722	JRC_SS03722-20221111_45_E5	Drosophila melanogaster	20x	w; VT031495-p65ADZp in attP40; 94H07-ZpGdbd in attP2/TM6B
SS03729	20230224_44_A5	A01	Tue Mar 07 11:36:38 EST 2023	254450	nerna_ss_screen_review	UAS_Chrimson_Venus_X_0070	Rubin	attP40; attP2	Sample#3173020328251097247	f	Rubin	Aljoscha Nern	JRC_SS03729	JRC_SS03729-20230224_44_A5	Drosophila melanogaster	20x	w; VT049367-p65ADZp in attP40/CyOTb; VT046049-ZpGdbd in attP2
SS03729	20230224_45_C5	A01	Wed Mar 08 11:13:14 EST 2023	254450	nerna_ss_screen_review	UAS_Chrimson_Venus_X_0070	Rubin	attP40; attP2	Sample#3173376830400888991	m	Rubin	Aljoscha Nern	JRC_SS03729	JRC_SS03729-20230224_45_C5	Drosophila melanogaster	20x	w; VT049367-p65ADZp in attP40/CyOTb; VT046049-ZpGdbd in attP2
SS03730	20230224_44_A6	A01	Tue Mar 07 11:36:38 EST 2023	254451	nerna_ss_screen_review	UAS_Chrimson_Venus_X_0070	Rubin	attP40; attP2	Sample#3173020328368537759	f	Rubin	Aljoscha Nern	JRC_SS03730	JRC_SS03730-20230224_44_A6	Drosophila melanogaster	20x	w; VT006395-p65ADZp in attP40; 83H09-ZpGDBD in attP2
SS03730	20230224_45_C6	A01	Wed Mar 08 11:13:14 EST 2023	254451	nerna_ss_screen_review	UAS_Chrimson_Venus_X_0070	Rubin	attP40; attP2	Sample#3173376830623187103	m	Rubin	Aljoscha Nern	JRC_SS03730	JRC_SS03730-20230224_45_C6	Drosophila melanogaster	20x	w; VT006395-p65ADZp in attP40; 83H09-ZpGDBD in attP2
SS03735	20230224_44_B1	A01	Tue Mar 07 11:36:38 EST 2023	254452	nerna_ss_screen_review	UAS_Chrimson_Venus_X_0070	Rubin	attP40; attP2	Sample#3173020328485978271	f	Rubin	Aljoscha Nern	JRC_SS03735	JRC_SS03735-20230224_44_B1	Drosophila melanogaster	20x	w; VT000360-p65ADZp in attP40/CyOTb; 79B08-ZpGdbd in attP2
SS03735	20230224_45_D1	A01	Wed Mar 08 11:13:14 EST 2023	254452	nerna_ss_screen_review	UAS_Chrimson_Venus_X_0070	Rubin	attP40; attP2	Sample#3173376830845485215	m	Rubin	Aljoscha Nern	JRC_SS03735	JRC_SS03735-20230224_45_D1	Drosophila melanogaster	20x	w; VT000360-p65ADZp in attP40/CyOTb; 79B08-ZpGdbd in attP2
SS03737	20230224_44_B2	A01	Tue Mar 07 11:36:38 EST 2023	254453	nerna_ss_screen_review	UAS_Chrimson_Venus_X_0070	Rubin	attP40; attP2	Sample#3173020328603418783	f	Rubin	Aljoscha Nern	JRC_SS03737	JRC_SS03737-20230224_44_B2	Drosophila melanogaster	20x	w; VT027323-p65ADZp in attP40; 78F07-ZpGDBD in attP2
SS03737	20230224_45_D2	A01	Wed Mar 08 11:13:15 EST 2023	254453	nerna_ss_screen_review	UAS_Chrimson_Venus_X_0070	Rubin	attP40; attP2	Sample#3173376831059394719	m	Rubin	Aljoscha Nern	JRC_SS03737	JRC_SS03737-20230224_45_D2	Drosophila melanogaster	20x	w; VT027323-p65ADZp in attP40; 78F07-ZpGDBD in attP2
SS03739	20220610_44_E2	A01	Wed Jun 22 13:38:08 EDT 2022	247205	nerna_ss_screen_review	UAS_Chrimson_Venus_X_0070	Rubin	attP40; attP2	Sample#3079539737329926242	f	Rubin	Aljoscha Nern	JRC_SS03739	JRC_SS03739-20220610_44_E2	Drosophila melanogaster	20x	w; VT016285-p65ADZp in attP40/CyOTb; VT019391-ZpGdbd in attP2
SS03739	20220610_45_C4	A01	Wed Jun 22 13:17:37 EDT 2022	247205	nerna_ss_screen_review	UAS_Chrimson_Venus_X_0070	Rubin	attP40; attP2	Sample#3079534573902626914	m	Rubin	Aljoscha Nern	JRC_SS03739	JRC_SS03739-20220610_45_C4	Drosophila melanogaster	20x	w; VT016285-p65ADZp in attP40/CyOTb; VT019391-ZpGdbd in attP2
SS03740	20220610_44_B3	A01	Wed Jun 22 13:38:07 EDT 2022	247198	nerna_ss_screen_review	UAS_Chrimson_Venus_X_0070	Rubin	attP40; attP2	Sample#3079539735144693858	f	Rubin	Aljoscha Nern	JRC_SS03740	JRC_SS03740-20220610_44_B3	Drosophila melanogaster	20x	w; VT016285-p65ADZp in attP40; VT058563-ZpGdbd in attP2
SS03740	20220610_44_I1	A01	Wed Jun 22 13:38:09 EDT 2022	247198	nerna_ss_screen_review	UAS_Chrimson_Venus_X_0070	Rubin	attP40; attP2	Sample#3079539740232384610	m	Rubin	Aljoscha Nern	JRC_SS03740	JRC_SS03740-20220610_44_I1	Drosophila melanogaster	20x	w; VT016285-p65ADZp in attP40; VT058563-ZpGdbd in attP2
SS03741	20230224_44_B3	A01	Tue Mar 07 11:36:38 EST 2023	254454	nerna_ss_screen_review	UAS_Chrimson_Venus_X_0070	Rubin	attP40; attP2	Sample#3173020328712470687	f	Rubin	Aljoscha Nern	JRC_SS03741	JRC_SS03741-20230224_44_B3	Drosophila melanogaster	20x	w; VT016285-p65ADZp in attP40; VT063731-ZpGDBD in attP2/TM6B
SS03741	20230224_45_D3	A01	Wed Mar 08 11:13:15 EST 2023	254454	nerna_ss_screen_review	UAS_Chrimson_Venus_X_0070	Rubin	attP40; attP2	Sample#3173376831269109919	m	Rubin	Aljoscha Nern	JRC_SS03741	JRC_SS03741-20230224_45_D3	Drosophila melanogaster	20x	w; VT016285-p65ADZp in attP40; VT063731-ZpGDBD in attP2/TM6B
SS03744	20230224_44_B4	A01	Tue Mar 07 11:36:38 EST 2023	254455	nerna_ss_screen_review	UAS_Chrimson_Venus_X_0070	Rubin	attP40; attP2	Sample#3173020328825716895	f	Rubin	Aljoscha Nern	JRC_SS03744	JRC_SS03744-20230224_44_B4	Drosophila melanogaster	20x	w; VT016285-p65ADZp in attP40; VT059699-ZpGdbd in attP2
SS03744	20230224_45_D4	A01	Wed Mar 08 11:13:15 EST 2023	254455	nerna_ss_screen_review	UAS_Chrimson_Venus_X_0070	Rubin	attP40; attP2	Sample#3173376831478825119	m	Rubin	Aljoscha Nern	JRC_SS03744	JRC_SS03744-20230224_45_D4	Drosophila melanogaster	20x	w; VT016285-p65ADZp in attP40; VT059699-ZpGdbd in attP2
SS03745	20221111_44_A1	A01	Wed Dec 07 12:54:05 EST 2022	251739	nerna_ss_screen_review	UAS_Chrimson_Venus_X_0070	Rubin	attP40; attP2	Sample#3140424914884886626	f	Rubin	Aljoscha Nern	JRC_SS03745	JRC_SS03745-20221111_44_A1	Drosophila melanogaster	20x	w; VT046049-p65ADZp in attP40/CyOTb; VT049367-ZpGDBD in attP2
SS03745	20221111_44_H4	A01	Tue Dec 06 14:03:08 EST 2022	251739	nerna_ss_screen_review	UAS_Chrimson_Venus_X_0070	Rubin	attP40; attP2	Sample#3140079901537730658	m	Rubin	Aljoscha Nern	JRC_SS03745	JRC_SS03745-20221111_44_H4	Drosophila melanogaster	20x	w; VT046049-p65ADZp in attP40/CyOTb; VT049367-ZpGDBD in attP2
SS03752	20200117_45_E3	A01	Wed Feb 05 14:57:44 EST 2020	206331	nerna_ss_screen_review	UAS_Chrimson_Venus_X_0070	Rubin	attP40; attP2	Sample#2765022201512984674	m			JRC_SS03752	JRC_SS03752-20200117_45_E3	Drosophila melanogaster	20x	w; 38G02-p65ADZp in attP40/CyO::Tb-RFP; 24A07-ZpGdbd in attP2/TM6B
SS03752	20200117_45_E6	A01	Wed Feb 05 14:57:44 EST 2020	206331	nerna_ss_screen_review	UAS_Chrimson_Venus_X_0070	Rubin	attP40; attP2	Sample#2765022201961775202	f			JRC_SS03752	JRC_SS03752-20200117_45_E6	Drosophila melanogaster	20x	w; 38G02-p65ADZp in attP40/CyO::Tb-RFP; 24A07-ZpGdbd in attP2/TM6B
SS03753	20230224_44_F4	A01	Tue Mar 07 11:36:38 EST 2023	254456	nerna_ss_screen_review	UAS_Chrimson_Venus_X_0070	Rubin	attP40; attP2	Sample#3173020331686232223	f	Rubin	Aljoscha Nern	JRC_SS03753	JRC_SS03753-20230224_44_F4	Drosophila melanogaster	20x	w; 41G07-p65ADZp in attP40; VT031495-ZpGdbd in attP2
SS03753	20230224_46_A1	A01	Wed Mar 08 16:29:06 EST 2023	254456	nerna_ss_screen_review	UAS_Chrimson_Venus_X_0070	Rubin	attP40; attP2	Sample#3173456321349419167	m	Rubin	Aljoscha Nern	JRC_SS03753	JRC_SS03753-20230224_46_A1	Drosophila melanogaster	20x	w; 41G07-p65ADZp in attP40; VT031495-ZpGdbd in attP2
SS03763	20220610_44_B4	A01	Wed Jun 22 13:38:07 EDT 2022	247199	nerna_ss_screen_review	UAS_Chrimson_Venus_X_0070	Rubin	attP40; attP2	Sample#3079539735274717282	f	Rubin	Aljoscha Nern	JRC_SS03763	JRC_SS03763-20220610_44_B4	Drosophila melanogaster	20x	w; 84E05-p65ADZp in attP40; 34C04-ZpGdbd in attP2
SS03763	20220610_44_I2	A01	Wed Jun 22 13:38:09 EDT 2022	247199	nerna_ss_screen_review	UAS_Chrimson_Venus_X_0070	Rubin	attP40; attP2	Sample#3079539740358213730	m	Rubin	Aljoscha Nern	JRC_SS03763	JRC_SS03763-20220610_44_I2	Drosophila melanogaster	20x	w; 84E05-p65ADZp in attP40; 34C04-ZpGdbd in attP2
SS03765	20220422_45_I2	A01	Thu May 05 12:45:08 EDT 2022	245690	nerna_ss_screen_review	UAS_Chrimson_Venus_X_0070	Rubin	attP40; attP2	Sample#3062131783861534818	f	Rubin	Aljoscha Nern	JRC_SS03765	JRC_SS03765-20220422_45_I2	Drosophila melanogaster	20x	w; 92A09-p65ADZp in attP40; 82E12-ZpGDBD in attP2
SS03765	20220422_45_I6	A01	Thu May 05 12:45:09 EDT 2022	245690	nerna_ss_screen_review	UAS_Chrimson_Venus_X_0070	Rubin	attP40; attP2	Sample#3062131784360656994	m	Rubin	Aljoscha Nern	JRC_SS03765	JRC_SS03765-20220422_45_I6	Drosophila melanogaster	20x	w; 92A09-p65ADZp in attP40; 82E12-ZpGDBD in attP2
SS03805	20230224_44_F3	A01	Tue Mar 07 11:36:38 EST 2023	254457	nerna_ss_screen_review	UAS_Chrimson_Venus_X_0070	Rubin	attP40; attP2	Sample#3173020331577180319	f	Rubin	Aljoscha Nern	JRC_SS03805	JRC_SS03805-20230224_44_F3	Drosophila melanogaster	20x	w; VT004971-p65ADZp in attP40; 83H09-ZpGDBD in attP2/TM6B
SS03805	20230224_46_A2	A01	Wed Mar 08 16:29:07 EST 2023	254457	nerna_ss_screen_review	UAS_Chrimson_Venus_X_0070	Rubin	attP40; attP2	Sample#3173456321475248287	m	Rubin	Aljoscha Nern	JRC_SS03805	JRC_SS03805-20230224_46_A2	Drosophila melanogaster	20x	w; VT004971-p65ADZp in attP40; 83H09-ZpGDBD in attP2/TM6B
SS03806	20230224_44_F5	A01	Tue Mar 07 11:36:38 EST 2023	254458	nerna_ss_screen_review	UAS_Chrimson_Venus_X_0070	Rubin	attP40; attP2	Sample#3173020331799478431	f	Rubin	Aljoscha Nern	JRC_SS03806	JRC_SS03806-20230224_44_F5	Drosophila melanogaster	20x	w; VT004971-p65ADZp in attP40; 85H01-ZpGdbd in attP2
SS03806	20230224_46_A3	A01	Wed Mar 08 16:29:07 EST 2023	254458	nerna_ss_screen_review	UAS_Chrimson_Venus_X_0070	Rubin	attP40; attP2	Sample#3173456321584300191	m	Rubin	Aljoscha Nern	JRC_SS03806	JRC_SS03806-20230224_46_A3	Drosophila melanogaster	20x	w; VT004971-p65ADZp in attP40; 85H01-ZpGdbd in attP2
SS03807	20230224_44_F6	A01	Tue Mar 07 11:36:38 EST 2023	254459	nerna_ss_screen_review	UAS_Chrimson_Venus_X_0070	Rubin	attP40; attP2	Sample#3173020331921113247	f	Rubin	Aljoscha Nern	JRC_SS03807	JRC_SS03807-20230224_44_F6	Drosophila melanogaster	20x	w; VT043086-p65ADZp in attP40; 85H01-ZpGdbd in attP2/TM6B
SS03807	20230224_46_A4	A01	Wed Mar 08 16:29:07 EST 2023	254459	nerna_ss_screen_review	UAS_Chrimson_Venus_X_0070	Rubin	attP40; attP2	Sample#3173456321693352095	m	Rubin	Aljoscha Nern	JRC_SS03807	JRC_SS03807-20230224_46_A4	Drosophila melanogaster	20x	w; VT043086-p65ADZp in attP40; 85H01-ZpGdbd in attP2/TM6B
SS03808	20230519_47_B5	A01	Wed Jun 14 16:13:36 EDT 2023	257305	nerna_ss_screen_review	UAS_Chrimson_Venus_X_0070	Rubin	attP40; attP2	Sample#3208951331704275103	f	Rubin	Aljoscha Nern	JRC_SS03808	JRC_SS03808-20230519_47_B5	Drosophila melanogaster	20x	w; VT026647-p65ADZp in attP40; VT000269-ZpGdbd in attP2/TM6B
SS03808	20230519_47_D6	A01	Wed Jun 14 16:13:37 EDT 2023	257305	nerna_ss_screen_review	UAS_Chrimson_Venus_X_0070	Rubin	attP40; attP2	Sample#3208951333197447327	m	Rubin	Aljoscha Nern	JRC_SS03808	JRC_SS03808-20230519_47_D6	Drosophila melanogaster	20x	w; VT026647-p65ADZp in attP40; VT000269-ZpGdbd in attP2/TM6B
SS03815	20230224_44_G2	A01	Tue Mar 07 11:36:39 EST 2023	254461	nerna_ss_screen_review	UAS_Chrimson_Venus_X_0070	Rubin	attP40; attP2	Sample#3173020332155994271	f	Rubin	Aljoscha Nern	JRC_SS03815	JRC_SS03815-20230224_44_G2	Drosophila melanogaster	20x	w; VT058433-p65ADZp in attP40; 80E07-ZpGdbd in attP2/TM6B
SS03815	20230224_46_A6	A01	Wed Mar 08 16:29:07 EST 2023	254461	nerna_ss_screen_review	UAS_Chrimson_Venus_X_0070	Rubin	attP40; attP2	Sample#3173456321903067295	m	Rubin	Aljoscha Nern	JRC_SS03815	JRC_SS03815-20230224_46_A6	Drosophila melanogaster	20x	w; VT058433-p65ADZp in attP40; 80E07-ZpGdbd in attP2/TM6B
SS03816	20230224_44_G3	A01	Tue Mar 07 11:36:39 EST 2023	254462	nerna_ss_screen_review	UAS_Chrimson_Venus_X_0070	Rubin	attP40; attP2	Sample#3173020332277629087	f	Rubin	Aljoscha Nern	JRC_SS03816	JRC_SS03816-20230224_44_G3	Drosophila melanogaster	20x	w; VT058433-p65ADZp in attP40/CyOTb; 91B01-ZpGdbd in attP2
SS03816	20230224_46_B1	A01	Wed Mar 08 16:29:07 EST 2023	254462	nerna_ss_screen_review	UAS_Chrimson_Venus_X_0070	Rubin	attP40; attP2	Sample#3173456322007924895	m	Rubin	Aljoscha Nern	JRC_SS03816	JRC_SS03816-20230224_46_B1	Drosophila melanogaster	20x	w; VT058433-p65ADZp in attP40/CyOTb; 91B01-ZpGdbd in attP2
SS03817	20230224_44_G4	A01	Tue Mar 07 11:36:39 EST 2023	254463	nerna_ss_screen_review	UAS_Chrimson_Venus_X_0070	Rubin	attP40; attP2	Sample#3173020332399263903	f	Rubin	Aljoscha Nern	JRC_SS03817	JRC_SS03817-20230224_44_G4	Drosophila melanogaster	20x	w; VT002061-p65ADZp in attP40; 55C11-ZpGDBD in attP2/TM6B
SS03817	20230224_46_B2	A01	Wed Mar 08 16:29:07 EST 2023	254463	nerna_ss_screen_review	UAS_Chrimson_Venus_X_0070	Rubin	attP40; attP2	Sample#3173456322112782495	m	Rubin	Aljoscha Nern	JRC_SS03817	JRC_SS03817-20230224_46_B2	Drosophila melanogaster	20x	w; VT002061-p65ADZp in attP40; 55C11-ZpGDBD in attP2/TM6B
SS03819	20230224_44_G5	A01	Tue Mar 07 11:36:39 EST 2023	254464	nerna_ss_screen_review	UAS_Chrimson_Venus_X_0070	Rubin	attP40; attP2	Sample#3173020332516704415	f	Rubin	Aljoscha Nern	JRC_SS03819	JRC_SS03819-20230224_44_G5	Drosophila melanogaster	20x	w; VT043166-p65ADZp in attP40/CyOTb; VT029570-ZpGdbd in attP2
SS03819	20230224_46_B3	A01	Wed Mar 08 16:29:07 EST 2023	254464	nerna_ss_screen_review	UAS_Chrimson_Venus_X_0070	Rubin	attP40; attP2	Sample#3173456322213445791	m	Rubin	Aljoscha Nern	JRC_SS03819	JRC_SS03819-20230224_46_B3	Drosophila melanogaster	20x	w; VT043166-p65ADZp in attP40/CyOTb; VT029570-ZpGdbd in attP2
SS03822	20191218_45_H4	A01	Wed Jan 22 17:59:37 EST 2020	205416	nerna_ss_screen_review	UAS_Chrimson_Venus_X_0070	Rubin	attP40; attP2	Sample#2759994542903001186	f			JRC_SS03822	JRC_SS03822-20191218_45_H4	Drosophila melanogaster	20x	w; VT043920-p65ADZp in attP40; 91B01-ZpGdbd in attP2/TM6B
SS03822	20191218_46_H4	A01	Wed Jan 22 18:32:07 EST 2020	205416	nerna_ss_screen_review	UAS_Chrimson_Venus_X_0070	Rubin	attP40; attP2	Sample#2760002724442407010	m			JRC_SS03822	JRC_SS03822-20191218_46_H4	Drosophila melanogaster	20x	w; VT043920-p65ADZp in attP40; 91B01-ZpGdbd in attP2/TM6B
SS03825	20230224_44_G6	A01	Tue Mar 07 11:36:39 EST 2023	254465	nerna_ss_screen_review	UAS_Chrimson_Venus_X_0070	Rubin	attP40; attP2	Sample#3173020332638339231	f	Rubin	Aljoscha Nern	JRC_SS03825	JRC_SS03825-20230224_44_G6	Drosophila melanogaster	20x	w; VT029570-p65ADZp in attP40/CyOTb; 25B07-ZpGdbd in attP2/TM6B
SS03825	20230224_46_B4	A01	Wed Mar 08 16:29:07 EST 2023	254465	nerna_ss_screen_review	UAS_Chrimson_Venus_X_0070	Rubin	attP40; attP2	Sample#3173456322318303391	m	Rubin	Aljoscha Nern	JRC_SS03825	JRC_SS03825-20230224_46_B4	Drosophila melanogaster	20x	w; VT029570-p65ADZp in attP40/CyOTb; 25B07-ZpGdbd in attP2/TM6B
SS03828	20230224_44_H1	A01	Tue Mar 07 11:36:39 EST 2023	254466	nerna_ss_screen_review	UAS_Chrimson_Venus_X_0070	Rubin	attP40; attP2	Sample#3173020332751585439	f	Rubin	Aljoscha Nern	JRC_SS03828	JRC_SS03828-20230224_44_H1	Drosophila melanogaster	20x	w; 20G03-p65ADZp in attP40/CyOTb; VT000269-ZpGdbd in attP2
SS03828	20230224_46_B5	A01	Wed Mar 08 16:29:07 EST 2023	254466	nerna_ss_screen_review	UAS_Chrimson_Venus_X_0070	Rubin	attP40; attP2	Sample#3173456322423160991	m	Rubin	Aljoscha Nern	JRC_SS03828	JRC_SS03828-20230224_46_B5	Drosophila melanogaster	20x	w; 20G03-p65ADZp in attP40/CyOTb; VT000269-ZpGdbd in attP2
SS03828	20230519_47_B4	A01	Wed Jun 14 16:13:36 EDT 2023	257304	nerna_ss_screen_review	UAS_Chrimson_Venus_X_0070	Rubin	attP40; attP2	Sample#3208951331582640287	f	Rubin	Aljoscha Nern	JRC_SS03828	JRC_SS03828-20230519_47_B4	Drosophila melanogaster	20x	w; 20G03-p65ADZp in attP40/CyOTb; VT000269-ZpGdbd in attP2
SS03828	20230519_47_D5	A01	Wed Jun 14 16:13:37 EDT 2023	257304	nerna_ss_screen_review	UAS_Chrimson_Venus_X_0070	Rubin	attP40; attP2	Sample#3208951333075812511	m	Rubin	Aljoscha Nern	JRC_SS03828	JRC_SS03828-20230519_47_D5	Drosophila melanogaster	20x	w; 20G03-p65ADZp in attP40/CyOTb; VT000269-ZpGdbd in attP2
SS03831	20230224_44_H2	A01	Tue Mar 07 11:36:39 EST 2023	254467	nerna_ss_screen_review	UAS_Chrimson_Venus_X_0070	Rubin	attP40; attP2	Sample#3173020332864831647	f	Rubin	Aljoscha Nern	JRC_SS03831	JRC_SS03831-20230224_44_H2	Drosophila melanogaster	20x	w; 23E11-p65ADZp in attP40; 85H01-ZpGdbd in attP2/TM6B
SS03831	20230224_46_B6	A01	Wed Mar 08 16:29:07 EST 2023	254467	nerna_ss_screen_review	UAS_Chrimson_Venus_X_0070	Rubin	attP40; attP2	Sample#3173456322528018591	m	Rubin	Aljoscha Nern	JRC_SS03831	JRC_SS03831-20230224_46_B6	Drosophila melanogaster	20x	w; 23E11-p65ADZp in attP40; 85H01-ZpGdbd in attP2/TM6B
SS03832	20230224_44_D5	A01	Tue Mar 07 11:36:38 EST 2023	254468	nerna_ss_screen_review	UAS_Chrimson_Venus_X_0070	Rubin	attP40; attP2	Sample#3173020330402775199	f	Rubin	Aljoscha Nern	JRC_SS03832	JRC_SS03832-20230224_44_D5	Drosophila melanogaster	20x	w; 25B07-p65ADZp in attP40; VT043166-ZpGdbd in attP2
SS03832	20230224_45_G5	A01	Wed Mar 08 11:13:16 EST 2023	254468	nerna_ss_screen_review	UAS_Chrimson_Venus_X_0070	Rubin	attP40; attP2	Sample#3173376835442442399	m	Rubin	Aljoscha Nern	JRC_SS03832	JRC_SS03832-20230224_45_G5	Drosophila melanogaster	20x	w; 25B07-p65ADZp in attP40; VT043166-ZpGdbd in attP2
SS03838	20220422_45_H1	A01	Thu May 05 12:45:08 EDT 2022	245691	nerna_ss_screen_review	UAS_Chrimson_Venus_X_0070	Rubin	attP40; attP2	Sample#3062131783114948706	f	Rubin	Aljoscha Nern	JRC_SS03838	JRC_SS03838-20220422_45_H1	Drosophila melanogaster	20x	w; 76E09-p65ADZp in attP40; VT046799-ZpGdbd in attP2/TM6B
SS03838	20220422_46_H1	A01	Thu May 05 15:43:37 EDT 2022	245691	nerna_ss_screen_review	UAS_Chrimson_Venus_X_0070	Rubin	attP40; attP2	Sample#3062176698742079586	m	Rubin	Aljoscha Nern	JRC_SS03838	JRC_SS03838-20220422_46_H1	Drosophila melanogaster	20x	w; 76E09-p65ADZp in attP40; VT046799-ZpGdbd in attP2/TM6B
SS03951	20230804_45_A1	A01	Tue Aug 22 14:55:06 EDT 2023	259553	wolfft_ss_screen_review	UAS_Chrimson_Venus_X_0070	Rubin	attP40; attP2	Sample#3233936337241374879	f	Rubin	Tanya Wolff	JRC_SS03951	JRC_SS03951-20230804_45_A1	Drosophila melanogaster	20x	w; 47G08-p65ADZp in attP40/CyOTb; 44A02-ZpGdbd in attP2
SS03951	20230804_45_C2	A01	Tue Aug 22 14:55:06 EDT 2023	259553	wolfft_ss_screen_review	UAS_Chrimson_Venus_X_0070	Rubin	attP40; attP2	Sample#3233936338822627487	m	Rubin	Tanya Wolff	JRC_SS03951	JRC_SS03951-20230804_45_C2	Drosophila melanogaster	20x	w; 47G08-p65ADZp in attP40/CyOTb; 44A02-ZpGdbd in attP2
SS04158	20200710_45_A3	A01	Tue Aug 11 19:54:07 EDT 2020	212381	ditp_ss_screen_review	UAS_Chrimson_Venus_X_0070	Card	attP40; attP2	Sample#2833210607556100194	f			JRC_SS04158	JRC_SS04158-20200710_45_A3	Drosophila melanogaster	20x	w; 53D12-p65ADZp in attP40/CyO::Tb-RFP; VT018689-ZpGdbd in attP2
SS04158	20200710_45_D2	A01	Tue Aug 11 19:54:08 EDT 2020	212381	ditp_ss_screen_review	UAS_Chrimson_Venus_X_0070	Card	attP40; attP2	Sample#2833210613780447330	m			JRC_SS04158	JRC_SS04158-20200710_45_D2	Drosophila melanogaster	20x	w; 53D12-p65ADZp in attP40/CyO::Tb-RFP; VT018689-ZpGdbd in attP2
SS04159	20191218_47_B3	A01	Sat Jan 18 11:11:10 EST 2020	205413	ditp_ss_screen_review	UAS_Chrimson_Venus_X_0070	Card	attP40; attP2	Sample#2758442201171099746	m			JRC_SS04159	JRC_SS04159-20191218_47_B3	Drosophila melanogaster	20x	w; 59F08-p65ADZp in attP40; 47H03-ZpGdbd in attP2
SS04159	20191218_48_B3	A01	Thu Jan 23 15:43:08 EST 2020	205413	ditp_ss_screen_review	UAS_Chrimson_Venus_X_0070	Card	attP40; attP2	Sample#2760322586523992162	f			JRC_SS04159	JRC_SS04159-20191218_48_B3	Drosophila melanogaster	20x	w; 59F08-p65ADZp in attP40; 47H03-ZpGdbd in attP2
SS04160	20210219_41_A4	A01	Wed Mar 10 13:11:20 EST 2021	219865	ditp_ss_screen_review	UAS_Chrimson_Venus_X_0070	Card	attP40; attP2	Sample#2909588182435627106	f	Descending Interneuron	Shigehiro Namiki	JRC_SS04160	JRC_SS04160-20210219_41_A4	Drosophila melanogaster	20x	w; 38H06-p65ADZp in attP40; 50B07-ZpGdbd in attP2
SS04160	20210219_41_F4	A01	Wed Mar 10 13:11:21 EST 2021	219865	ditp_ss_screen_review	UAS_Chrimson_Venus_X_0070	Card	attP40; attP2	Sample#2909588186281803874	m	Descending Interneuron	Shigehiro Namiki	JRC_SS04160	JRC_SS04160-20210219_41_F4	Drosophila melanogaster	20x	w; 38H06-p65ADZp in attP40; 50B07-ZpGdbd in attP2
SS04161	20191218_47_B4	A01	Sat Jan 18 11:11:10 EST 2020	205414	ditp_ss_screen_review	UAS_Chrimson_Venus_X_0070	Card	attP40; attP2	Sample#2758442201380814946	m			JRC_SS04161	JRC_SS04161-20191218_47_B4	Drosophila melanogaster	20x	w; 59A06-p65ADZp in attP40; 64B11-ZpGdbd in attP2
SS04161	20191218_48_B4	A01	Thu Jan 23 15:43:08 EST 2020	205414	ditp_ss_screen_review	UAS_Chrimson_Venus_X_0070	Card	attP40; attP2	Sample#2760322586750484578	f			JRC_SS04161	JRC_SS04161-20191218_48_B4	Drosophila melanogaster	20x	w; 59A06-p65ADZp in attP40; 64B11-ZpGdbd in attP2
SS04259	20220304_44_B2	A01	Mon Mar 21 13:40:36 EDT 2022	244197	rubing_ss_screen_review	UAS_Chrimson_Venus_X_0070	Rubin	attP40; attP2	Sample#3045838285013254242	f	Rubin	Gerry Rubin	JRC_SS04259	JRC_SS04259-20220304_44_B2	Drosophila melanogaster	20x	w[1118]; P{y[+t7.7] w[+mC]=VT043699-p65.AD}attP40/CyO, P{w[+mC]=2xTb[1]-RFP}CyO; P{y[+t7.7] w[+mC]=R28H03-GAL4.DBD}attP2/TM6B, Tb[1]
SS04259	20220304_44_F1	A01	Mon Mar 21 13:25:05 EDT 2022	244197	rubing_ss_screen_review	UAS_Chrimson_Venus_X_0070	Rubin	attP40; attP2	Sample#3045834383777857634	m	Rubin	Gerry Rubin	JRC_SS04259	JRC_SS04259-20220304_44_F1	Drosophila melanogaster	20x	w[1118]; P{y[+t7.7] w[+mC]=VT043699-p65.AD}attP40/CyO, P{w[+mC]=2xTb[1]-RFP}CyO; P{y[+t7.7] w[+mC]=R28H03-GAL4.DBD}attP2/TM6B, Tb[1]
SS04412	20230224_44_D6	A01	Tue Mar 07 11:36:38 EST 2023	254469	nerna_ss_screen_review	UAS_Chrimson_Venus_X_0070	Rubin	attP40; attP2	Sample#3173020330520215711	f	Rubin	Aljoscha Nern	JRC_SS04412	JRC_SS04412-20230224_44_D6	Drosophila melanogaster	20x	w; VT038216-p65ADZp in attP40; 80E07-ZpGdbd in attP2
SS04412	20230224_45_G6	A01	Wed Mar 08 11:13:16 EST 2023	254469	nerna_ss_screen_review	UAS_Chrimson_Venus_X_0070	Rubin	attP40; attP2	Sample#3173376835652157599	m	Rubin	Aljoscha Nern	JRC_SS04412	JRC_SS04412-20230224_45_G6	Drosophila melanogaster	20x	w; VT038216-p65ADZp in attP40; 80E07-ZpGdbd in attP2
SS04418	20230224_44_E1	A01	Tue Mar 07 11:36:38 EST 2023	254470	nerna_ss_screen_review	UAS_Chrimson_Venus_X_0070	Rubin	attP40; attP2	Sample#3173020330637656223	f	Rubin	Aljoscha Nern	JRC_SS04418	JRC_SS04418-20230224_44_E1	Drosophila melanogaster	20x	w; VT062613-p65ADZp in attP40; 38A07-ZpGDBD in attP2/TM6B
SS04418	20230224_45_H1	A01	Wed Mar 08 11:13:16 EST 2023	254470	nerna_ss_screen_review	UAS_Chrimson_Venus_X_0070	Rubin	attP40; attP2	Sample#3173376835866067103	m	Rubin	Aljoscha Nern	JRC_SS04418	JRC_SS04418-20230224_45_H1	Drosophila melanogaster	20x	w; VT062613-p65ADZp in attP40; 38A07-ZpGDBD in attP2/TM6B
SS04431	20230224_44_E2	A01	Tue Mar 07 11:36:38 EST 2023	254471	nerna_ss_screen_review	UAS_Chrimson_Venus_X_0070	Rubin	attP40; attP2	Sample#3173020330755096735	f	Rubin	Aljoscha Nern	JRC_SS04431	JRC_SS04431-20230224_44_E2	Drosophila melanogaster	20x	w; VT046018-p65ADZp in attP40/CyOTb; 55C09-ZpGdbd in attP2
SS04431	20230224_45_H2	A01	Wed Mar 08 11:13:16 EST 2023	254471	nerna_ss_screen_review	UAS_Chrimson_Venus_X_0070	Rubin	attP40; attP2	Sample#3173376836075782303	m	Rubin	Aljoscha Nern	JRC_SS04431	JRC_SS04431-20230224_45_H2	Drosophila melanogaster	20x	w; VT046018-p65ADZp in attP40/CyOTb; 55C09-ZpGdbd in attP2
SS04432	20230224_44_E3	A01	Tue Mar 07 11:36:38 EST 2023	254472	nerna_ss_screen_review	UAS_Chrimson_Venus_X_0070	Rubin	attP40; attP2	Sample#3173020330876731551	f	Rubin	Aljoscha Nern	JRC_SS04432	JRC_SS04432-20230224_44_E3	Drosophila melanogaster	20x	w; VT049745-p65ADZp in attP40; 39G09-ZpGDBD in attP2
SS04432	20230224_45_H3	A01	Wed Mar 08 11:13:16 EST 2023	254472	nerna_ss_screen_review	UAS_Chrimson_Venus_X_0070	Rubin	attP40; attP2	Sample#3173376836285497503	m	Rubin	Aljoscha Nern	JRC_SS04432	JRC_SS04432-20230224_45_H3	Drosophila melanogaster	20x	w; VT049745-p65ADZp in attP40; 39G09-ZpGDBD in attP2
SS04433	20220610_44_D1	A01	Wed Jun 22 13:38:08 EDT 2022	247175	nerna_ss_screen_review	UAS_Chrimson_Venus_X_0070	Rubin	attP40; attP2	Sample#3079539736428150882	f	Rubin	Aljoscha Nern	JRC_SS04433	JRC_SS04433-20220610_44_D1	Drosophila melanogaster	20x	w; VT018767-p65ADZp in attP40; 30F10-ZpGdbd in attP2
SS04433	20220610_45_B3	A01	Wed Jun 22 13:17:37 EDT 2022	247175	nerna_ss_screen_review	UAS_Chrimson_Venus_X_0070	Rubin	attP40; attP2	Sample#3079534572921159778	m	Rubin	Aljoscha Nern	JRC_SS04433	JRC_SS04433-20220610_45_B3	Drosophila melanogaster	20x	w; VT018767-p65ADZp in attP40; 30F10-ZpGdbd in attP2
SS04434	20220610_44_D2	A01	Wed Jun 22 13:38:08 EDT 2022	247176	nerna_ss_screen_review	UAS_Chrimson_Venus_X_0070	Rubin	attP40; attP2	Sample#3079539736558174306	f	Rubin	Aljoscha Nern	JRC_SS04434	JRC_SS04434-20220610_44_D2	Drosophila melanogaster	20x	w; VT040561-p65ADZp in attP40; VT045658-ZpGdbd in attP2/TM6B
SS04434	20220610_45_B4	A01	Wed Jun 22 13:17:37 EDT 2022	247176	nerna_ss_screen_review	UAS_Chrimson_Venus_X_0070	Rubin	attP40; attP2	Sample#3079534573055377506	m	Rubin	Aljoscha Nern	JRC_SS04434	JRC_SS04434-20220610_45_B4	Drosophila melanogaster	20x	w; VT040561-p65ADZp in attP40; VT045658-ZpGdbd in attP2/TM6B
SS04438	20200821_42_C6	A01	Thu Sep 03 13:31:39 EDT 2020	213153	nerna_ss_screen_review	UAS_Chrimson_Venus_X_0070	Rubin	attP40; attP2	Sample#2841449278272962658	f			JRC_SS04438	JRC_SS04438-20200821_42_C6	Drosophila melanogaster	20x	w; VT058487-p65ADZp in attP40; 35G07-ZpGdbd in attP2
SS04438	20200821_42_G6	A01	Thu Sep 03 13:31:41 EDT 2020	213153	nerna_ss_screen_review	UAS_Chrimson_Venus_X_0070	Rubin	attP40; attP2	Sample#2841449286145671266	m			JRC_SS04438	JRC_SS04438-20200821_42_G6	Drosophila melanogaster	20x	w; VT058487-p65ADZp in attP40; 35G07-ZpGdbd in attP2
SS04441	20230224_45_A6	A01	Wed Mar 08 11:13:14 EST 2023	254473	nerna_ss_screen_review	UAS_Chrimson_Venus_X_0070	Rubin	attP40; attP2	Sample#3173376827972386975	f	Rubin	Aljoscha Nern	JRC_SS04441	JRC_SS04441-20230224_45_A6	Drosophila melanogaster	20x	w; VT046049-p65ADZp in attP40; 46F02-ZpGDBD in attP2
SS04441	20230224_46_D4	A01	Wed Mar 08 16:29:07 EST 2023	254473	nerna_ss_screen_review	UAS_Chrimson_Venus_X_0070	Rubin	attP40; attP2	Sample#3173456323471736991	m	Rubin	Aljoscha Nern	JRC_SS04441	JRC_SS04441-20230224_46_D4	Drosophila melanogaster	20x	w; VT046049-p65ADZp in attP40; 46F02-ZpGDBD in attP2
SS04443	20230224_45_B1	A01	Wed Mar 08 11:13:14 EST 2023	254474	nerna_ss_screen_review	UAS_Chrimson_Venus_X_0070	Rubin	attP40; attP2	Sample#3173376828190490783	f	Rubin	Aljoscha Nern	JRC_SS04443	JRC_SS04443-20230224_45_B1	Drosophila melanogaster	20x	w; 17H01-p65ADZp in attP40/CyOTb; 21B12-ZpGdbd in attP2/TM6B
SS04443	20230224_46_D5	A01	Wed Mar 08 16:29:07 EST 2023	254474	nerna_ss_screen_review	UAS_Chrimson_Venus_X_0070	Rubin	attP40; attP2	Sample#3173456323576594591	m	Rubin	Aljoscha Nern	JRC_SS04443	JRC_SS04443-20230224_46_D5	Drosophila melanogaster	20x	w; 17H01-p65ADZp in attP40/CyOTb; 21B12-ZpGdbd in attP2/TM6B
SS04528	20220128_46_I2	A01	Thu Feb 10 16:15:08 EST 2022	243575	ditp_ss_screen_review	UAS_Chrimson_Venus_X_0070	Card	attP40; attP2	Sample#3031759150779465826	f	Descending Interneuron	Shigehiro Namiki	JRC_SS04528	JRC_SS04528-20220128_46_I2	Drosophila melanogaster	20x	w; 19G08-p65ADZp in attP40; 47F01-ZpGdbd in attP2
SS04528	20220128_46_I5	A01	Thu Feb 10 16:15:08 EST 2022	243575	ditp_ss_screen_review	UAS_Chrimson_Venus_X_0070	Card	attP40; attP2	Sample#3031759151123398754	m	Descending Interneuron	Shigehiro Namiki	JRC_SS04528	JRC_SS04528-20220128_46_I5	Drosophila melanogaster	20x	w; 19G08-p65ADZp in attP40; 47F01-ZpGdbd in attP2
SS04530	20210219_41_C4	A01	Wed Mar 10 13:11:20 EST 2021	219877	ditp_ss_screen_review	UAS_Chrimson_Venus_X_0070	Card	attP40; attP2	Sample#2909588184289509474	f	Descending Interneuron	Shigehiro Namiki	JRC_SS04530	JRC_SS04530-20210219_41_C4	Drosophila melanogaster	20x	w; 40F04-p65ADZp in attP40; 83B06-ZpGdbd in attP2/TM6B
SS04530	20210219_41_H4	A01	Wed Mar 10 13:11:21 EST 2021	219877	ditp_ss_screen_review	UAS_Chrimson_Venus_X_0070	Card	attP40; attP2	Sample#2909588188118909026	m	Descending Interneuron	Shigehiro Namiki	JRC_SS04530	JRC_SS04530-20210219_41_H4	Drosophila melanogaster	20x	w; 40F04-p65ADZp in attP40; 83B06-ZpGdbd in attP2/TM6B
SS04532	20221028_47_A6	A01	Wed Nov 09 11:32:40 EST 2022	251504	ditp_ss_screen_review	UAS_Chrimson_Venus_X_0070	Card	attP40; attP2	Sample#3130257562151157858	f	Descending Interneuron	Shigehiro Namiki	JRC_SS04532	JRC_SS04532-20221028_47_A6	Drosophila melanogaster	20x	w; 72H06-p65ADZp in attP40; VT033290-ZpGdbd in attP2
SS04532	20221028_47_C6	A01	Wed Nov 09 11:32:40 EST 2022	251504	ditp_ss_screen_review	UAS_Chrimson_Venus_X_0070	Card	attP40; attP2	Sample#3130257564323807330	m	Descending Interneuron	Shigehiro Namiki	JRC_SS04532	JRC_SS04532-20221028_47_C6	Drosophila melanogaster	20x	w; 72H06-p65ADZp in attP40; VT033290-ZpGdbd in attP2
SS04710	20220401_46_B3	A01	Thu Apr 14 13:40:08 EDT 2022	245118	wolfft_ss_screen_review	UAS_Chrimson_Venus_X_0070	Rubin	attP40; attP2	Sample#3054535476326170722	f	Rubin	Tanya Wolff	JRC_SS04710	JRC_SS04710-20220401_46_B3	Drosophila melanogaster	20x	w; VT010264-p65ADZp in attP40; 53H08-ZpGdbd in attP2
SS04710	20220401_47_B3	A01	Wed Apr 13 13:23:09 EDT 2022	245118	wolfft_ss_screen_review	UAS_Chrimson_Venus_X_0070	Rubin	attP40; attP2	Sample#3054168814162804834	m	Rubin	Tanya Wolff	JRC_SS04710	JRC_SS04710-20220401_47_B3	Drosophila melanogaster	20x	w; VT010264-p65ADZp in attP40; 53H08-ZpGdbd in attP2
SS04723	20220916_42_D1	A01	Thu Sep 29 11:17:37 EDT 2022	250378	trumanj_ss_screen_review	UAS_Chrimson_Venus_X_0070	Truman	attP40; attP2	Sample#3115380774954598498	f	Truman	Jim Truman	JRC_SS04723	JRC_SS04723-20220916_42_D1	Drosophila melanogaster	20x	w; VT046782-p65ADZp in attP40; 30G06-ZpGdbd in attP2/TM6B
SS04723	20220916_42_H6	A01	Thu Sep 29 11:17:37 EDT 2022	250378	trumanj_ss_screen_review	UAS_Chrimson_Venus_X_0070	Truman	attP40; attP2	Sample#3115380775629881442	m	Truman	Jim Truman	JRC_SS04723	JRC_SS04723-20220916_42_H6	Drosophila melanogaster	20x	w; VT046782-p65ADZp in attP40; 30G06-ZpGdbd in attP2/TM6B
SS04724	20220916_42_D6	A01	Thu Sep 29 11:57:10 EDT 2022	250383	trumanj_ss_screen_review	UAS_Chrimson_Venus_X_0070	Truman	attP40; attP2	Sample#3115390725227806818	f	Truman	Jim Truman	JRC_SS04724	JRC_SS04724-20220916_42_D6	Drosophila melanogaster	20x	w; VT050249-p65ADZp in attP40/CyOTb; VT043132-ZpGDBD in attP2
SS04724	20220916_42_I5	A01	Thu Sep 29 11:57:10 EDT 2022	250383	trumanj_ss_screen_review	UAS_Chrimson_Venus_X_0070	Truman	attP40; attP2	Sample#3115390728801353826	m	Truman	Jim Truman	JRC_SS04724	JRC_SS04724-20220916_42_I5	Drosophila melanogaster	20x	w; VT050249-p65ADZp in attP40/CyOTb; VT043132-ZpGDBD in attP2
SS04726	20220916_42_D5	A01	Thu Sep 29 11:57:10 EDT 2022	250382	trumanj_ss_screen_review	UAS_Chrimson_Venus_X_0070	Truman	attP40; attP2	Sample#3115390725085200482	f	Truman	Jim Truman	JRC_SS04726	JRC_SS04726-20220916_42_D5	Drosophila melanogaster	20x	w; VT044519-p65ADZp in attP40; VT040346-ZpGdbd in attP2/TM6B
SS04726	20220916_42_I4	A01	Thu Sep 29 11:57:10 EDT 2022	250382	trumanj_ss_screen_review	UAS_Chrimson_Venus_X_0070	Truman	attP40; attP2	Sample#3115390728658747490	m	Truman	Jim Truman	JRC_SS04726	JRC_SS04726-20220916_42_I4	Drosophila melanogaster	20x	w; VT044519-p65ADZp in attP40; VT040346-ZpGdbd in attP2/TM6B
SS04728	20220916_42_E2	A01	Thu Sep 29 11:57:10 EDT 2022	250385	trumanj_ss_screen_review	UAS_Chrimson_Venus_X_0070	Truman	attP40; attP2	Sample#3115390725513019490	f	Truman	Jim Truman	JRC_SS04728	JRC_SS04728-20220916_42_E2	Drosophila melanogaster	20x	w; VT040346-p65ADZp in attP40; VT050658-ZpGDBD in attP2
SS04728	20220916_42_J1	A01	Thu Sep 29 11:57:10 EDT 2022	250385	trumanj_ss_screen_review	UAS_Chrimson_Venus_X_0070	Truman	attP40; attP2	Sample#3115390729090760802	m	Truman	Jim Truman	JRC_SS04728	JRC_SS04728-20220916_42_J1	Drosophila melanogaster	20x	w; VT040346-p65ADZp in attP40; VT050658-ZpGDBD in attP2
SS04728	20220923_43_C5	A01	Mon Oct 03 15:08:10 EDT 2022	250497	minegishir_ss_screen_review	UAS_Chrimson_Venus_X_0070	Truman	attP40; attP2	Sample#3116888346907902050	f	Dickson	Ryo	JRC_SS04728	JRC_SS04728-20220923_43_C5	Drosophila melanogaster	20x	w; VT040346-p65ADZp in attP40; VT050658-ZpGDBD in attP2
SS04728	20220923_43_G2	A01	Mon Oct 03 15:08:11 EDT 2022	250497	minegishir_ss_screen_review	UAS_Chrimson_Venus_X_0070	Truman	attP40; attP2	Sample#3116888350745690210	m	Dickson	Ryo	JRC_SS04728	JRC_SS04728-20220923_43_G2	Drosophila melanogaster	20x	w; VT040346-p65ADZp in attP40; VT050658-ZpGDBD in attP2
SS04730	20230421_47_A1	A01	Wed May 03 12:44:37 EDT 2023	256133	minegishir_ss_screen_review	UAS_Chrimson_Venus_X_0070	Truman	attP40; attP2	Sample#3193678445355729055	f	Dickson	Ryo Minegishi	JRC_SS04730	JRC_SS04730-20230421_47_A1	Drosophila melanogaster	20x	w; VT058873-p65ADZp in attP40; 73A06-ZpGdbd in attP2
SS04730	20230421_47_C3	A01	Wed May 03 12:44:37 EDT 2023	256133	minegishir_ss_screen_review	UAS_Chrimson_Venus_X_0070	Truman	attP40; attP2	Sample#3193678448027500703	m	Dickson	Ryo Minegishi	JRC_SS04730	JRC_SS04730-20230421_47_C3	Drosophila melanogaster	20x	w; VT058873-p65ADZp in attP40; 73A06-ZpGdbd in attP2
SS04732	20230616_45_A1	A01	Thu Jul 06 16:16:35 EDT 2023	257625	trumanj_ss_screen_review	UAS_Chrimson_Venus_X_0070	Truman	attP40; attP2	Sample#3216924611912401055	f	Truman	Jim Truman	JRC_SS04732	JRC_SS04732-20230616_45_A1	Drosophila melanogaster	20x	w; VT064489-p65ADZp in attP40/CyOTb; VT049923-ZpGdbd in attP2
SS04732	20230616_45_B3	A01	Thu Jul 06 16:16:35 EDT 2023	257625	trumanj_ss_screen_review	UAS_Chrimson_Venus_X_0070	Truman	attP40; attP2	Sample#3216924613246189727	m	Truman	Jim Truman	JRC_SS04732	JRC_SS04732-20230616_45_B3	Drosophila melanogaster	20x	w; VT064489-p65ADZp in attP40/CyOTb; VT049923-ZpGdbd in attP2
SS04733	20230616_45_A2	A01	Thu Jul 06 16:16:35 EDT 2023	257626	trumanj_ss_screen_review	UAS_Chrimson_Venus_X_0070	Truman	attP40; attP2	Sample#3216924612105339039	f	Truman	Jim Truman	JRC_SS04733	JRC_SS04733-20230616_45_A2	Drosophila melanogaster	20x	w; VT064489-p65ADZp in attP40/CyOTb; 23C06-ZpGdbd in attP2/TM6B
SS04733	20230616_45_B4	A01	Thu Jul 06 16:16:35 EDT 2023	257626	trumanj_ss_screen_review	UAS_Chrimson_Venus_X_0070	Truman	attP40; attP2	Sample#3216924613409767583	m	Truman	Jim Truman	JRC_SS04733	JRC_SS04733-20230616_45_B4	Drosophila melanogaster	20x	w; VT064489-p65ADZp in attP40/CyOTb; 23C06-ZpGdbd in attP2/TM6B
SS04736	20220916_42_E3	A01	Thu Sep 29 11:57:10 EDT 2022	250386	trumanj_ss_screen_review	UAS_Chrimson_Venus_X_0070	Truman	attP40; attP2	Sample#3115390725655625826	f	Truman	Jim Truman	JRC_SS04736	JRC_SS04736-20220916_42_E3	Drosophila melanogaster	20x	w; VT044946-p65ADZp in attP40; 30A10-ZpGDBD in attP2
SS04736	20220916_42_J2	A01	Thu Sep 29 11:57:11 EDT 2022	250386	trumanj_ss_screen_review	UAS_Chrimson_Venus_X_0070	Truman	attP40; attP2	Sample#3115390729233367138	m	Truman	Jim Truman	JRC_SS04736	JRC_SS04736-20220916_42_J2	Drosophila melanogaster	20x	w; VT044946-p65ADZp in attP40; 30A10-ZpGDBD in attP2
SS04738	20230616_45_A3	A01	Thu Jul 06 16:16:35 EDT 2023	257627	trumanj_ss_screen_review	UAS_Chrimson_Venus_X_0070	Truman	attP40; attP2	Sample#3216924612277305503	f	Truman	Jim Truman	JRC_SS04738	JRC_SS04738-20230616_45_A3	Drosophila melanogaster	20x	w; VT019339-p65ADZp in attP40; VT050658-ZpGDBD in attP2/TM6B
SS04738	20230616_45_B5	A01	Thu Jul 06 16:16:35 EDT 2023	257627	trumanj_ss_screen_review	UAS_Chrimson_Venus_X_0070	Truman	attP40; attP2	Sample#3216924613577539743	m	Truman	Jim Truman	JRC_SS04738	JRC_SS04738-20230616_45_B5	Drosophila melanogaster	20x	w; VT019339-p65ADZp in attP40; VT050658-ZpGDBD in attP2/TM6B
SS04739	20220916_42_C5	A01	Thu Sep 29 11:57:09 EDT 2022	250376	trumanj_ss_screen_review	UAS_Chrimson_Venus_X_0070	Truman	attP40; attP2	Sample#3115390724514775138	f	Truman	Jim Truman	JRC_SS04739	JRC_SS04739-20220916_42_C5	Drosophila melanogaster	20x	w; 34F03-p65ADZp in attP40/CyOTb; VT049923-ZpGdbd in attP2
SS04739	20220916_42_G4	A01	Thu Sep 29 11:57:10 EDT 2022	250376	trumanj_ss_screen_review	UAS_Chrimson_Venus_X_0070	Truman	attP40; attP2	Sample#3115390727232684130	m	Truman	Jim Truman	JRC_SS04739	JRC_SS04739-20220916_42_G4	Drosophila melanogaster	20x	w; 34F03-p65ADZp in attP40/CyOTb; VT049923-ZpGdbd in attP2
SS04741	20220916_42_D2	A01	Thu Sep 29 11:57:09 EDT 2022	250379	trumanj_ss_screen_review	UAS_Chrimson_Venus_X_0070	Truman	attP40; attP2	Sample#3115390724799987810	f	Truman	Jim Truman	JRC_SS04741	JRC_SS04741-20220916_42_D2	Drosophila melanogaster	20x	w; 54D12-p65ADZp in attP40; 73A06-ZpGdbd in attP2
SS04741	20220916_42_I1	A01	Thu Sep 29 11:57:10 EDT 2022	250379	trumanj_ss_screen_review	UAS_Chrimson_Venus_X_0070	Truman	attP40; attP2	Sample#3115390728230928482	m	Truman	Jim Truman	JRC_SS04741	JRC_SS04741-20220916_42_I1	Drosophila melanogaster	20x	w; 54D12-p65ADZp in attP40; 73A06-ZpGdbd in attP2
SS04742	20220916_42_C4	A01	Thu Sep 29 11:57:09 EDT 2022	250375	trumanj_ss_screen_review	UAS_Chrimson_Venus_X_0070	Truman	attP40; attP2	Sample#3115390724372168802	f	Truman	Jim Truman	JRC_SS04742	JRC_SS04742-20220916_42_C4	Drosophila melanogaster	20x	w; 73B05-p65ADZp in attP40/CyOTb; VT058873-ZpGdbd in attP2
SS04742	20220916_42_G3	A01	Thu Sep 29 11:57:10 EDT 2022	250375	trumanj_ss_screen_review	UAS_Chrimson_Venus_X_0070	Truman	attP40; attP2	Sample#3115390727085883490	m	Truman	Jim Truman	JRC_SS04742	JRC_SS04742-20220916_42_G3	Drosophila melanogaster	20x	w; 73B05-p65ADZp in attP40/CyOTb; VT058873-ZpGdbd in attP2
SS04744	20230616_45_A4	A01	Thu Jul 06 16:16:35 EDT 2023	257628	trumanj_ss_screen_review	UAS_Chrimson_Venus_X_0070	Truman	attP40; attP2	Sample#3216924612445077663	f	Truman	Jim Truman	JRC_SS04744	JRC_SS04744-20230616_45_A4	Drosophila melanogaster	20x	w; 77B09-p65ADZp in attP40; 73A06-ZpGdbd in attP2
SS04744	20230616_45_B6	A01	Thu Jul 06 16:16:35 EDT 2023	257628	trumanj_ss_screen_review	UAS_Chrimson_Venus_X_0070	Truman	attP40; attP2	Sample#3216924613741117599	m	Truman	Jim Truman	JRC_SS04744	JRC_SS04744-20230616_45_B6	Drosophila melanogaster	20x	w; 77B09-p65ADZp in attP40; 73A06-ZpGdbd in attP2
[truncated: 4,932 more rows]
