# Supplementary material for: A split-GAL4 driver line resource for Drosophila neuron types
Source: bioRxiv preprint, doi:10.1101/2024.01.09.574419, version 4 (2024-10-29)
Supplement: Figure 1 - Supplemental File 4 [file 574419_file05.xlsx]

## Sheet: Fly samples
Line	DOI	Genotype	Slide Code	Data Set	Effector	Age	Creation Date	Cross Barcode	Lab Id	GUID	Gender	Heat Shock Age Minutes	Imaging Project	Lab	Lab Member	Name	Organism	Published Objectives
IS00127	this paper	26C06-p65ADZp in attP40; MKRS/TM6B_43D09-ZpGdbd in attP2	20210702_51_C5	asoy_is_screen_review	UAS_Chrimson_Venus_X_0070	A01	Thu Jul 22 12:07:39 EDT 2021	231223	Fly Light	Sample#2958117033616605282	f		screen	Aso	Yoshi Aso	JRC_IS00127-20210702_51_C5	Drosophila melanogaster	20x
IS00261	this paper	72G03-p65ADZp in attP40_43D09-ZpGdbd in attP2	20210702_51_C6	asoy_is_screen_review	UAS_Chrimson_Venus_X_0070	A01	Thu Jul 22 12:07:40 EDT 2021	231224	Fly Light	Sample#2958117033763405922	f		screen	Aso	Yoshi Aso	JRC_IS00261-20210702_51_C6	Drosophila melanogaster	20x
IS00264	this paper	72G03-p65ADZp in attP40_56E07-ZpGdbd in attP2	20210702_47_C6	asoy_is_screen_review	UAS_Chrimson_Venus_X_0070	A01	Fri Jul 23 10:58:40 EDT 2021	231244	Fly Light	Sample#2958462059362123874	f		screen	Aso	Yoshi Aso	JRC_IS00264-20210702_47_C6	Drosophila melanogaster	20x
IS00273	this paper	72G03-p65ADZp in attP40_R9D11-ZpGdbd in attP2	20210702_47_G4	asoy_is_screen_review	UAS_Chrimson_Venus_X_0070	A01	Fri Jul 23 10:58:41 EDT 2021	231199	Fly Light	Sample#2958462061668991074	f		screen	Aso	Yoshi Aso	JRC_IS00273-20210702_47_G4	Drosophila melanogaster	20x
IS00289	this paper	91D10-p65ADZp in attP40; MKRS/TM6B_26C06-ZpGdbd in attP2	20210702_46_B3	asoy_is_screen_review	UAS_Chrimson_Venus_X_0070	A01	Thu Jul 29 15:14:40 EDT 2021	231280	Fly Light	Sample#2960700811073552482	f		screen	Aso	Yoshi Aso	JRC_IS00289-20210702_46_B3	Drosophila melanogaster	20x
IS00290	this paper	91D10-p65ADZp in attP40; MKRS/TM6B_43D09-ZpGdbd in attP2	20210702_51_D1	asoy_is_screen_review	UAS_Chrimson_Venus_X_0070	A01	Thu Jul 22 12:07:40 EDT 2021	231225	Fly Light	Sample#2958117033885040738	f		screen	Aso	Yoshi Aso	JRC_IS00290-20210702_51_D1	Drosophila melanogaster	20x
IS00438	this paper	10D10-p65ADZp in attP40; MKRS/TM6B_91H11-ZpGdbd in attP2	20160129_53_E2	goldammerj_is_screen_review	UAS_Chrimson_Venus_X_0070	A00	Tue Feb 23 17:56:05 EST 2016	119648	Fly Light	Sample#2242141396041465954	f		screen	Terra Incognita	Jens Goldammer	JRC_IS00438-20160129_53_E2	Drosophila melanogaster	20x
IS00438	this paper	10D10-p65ADZp in attP40; MKRS/TM6B_91H11-ZpGdbd in attP2	20160311_41_E4	nerna_is_screen_review	HAV5_X_0083	A01	Tue Apr 05 07:33:51 EDT 2016	122710	Fly Light	Sample#2257189996979028005	f		screen	Rubin	Aljoscha Nern	JRC_IS00438-20160311_41_E4	Drosophila melanogaster	20x
IS00438	this paper	10D10-p65ADZp in attP40; MKRS/TM6B_91H11-ZpGdbd in attP2	20210409_41_G4	nerna_is_screen_review	UAS_Chrimson_Venus_X_0070	A01	Thu Apr 22 14:45:43 EDT 2021	225277	Fly Light	Sample#2925179513782403170	f		screen	Rubin	Aljoscha Nern	JRC_IS00438-20210409_41_G4	Drosophila melanogaster	20x
IS00438	this paper	10D10-p65ADZp in attP40; MKRS/TM6B_91H11-ZpGdbd in attP2	20160708_51_D3	rubing_itom10_is_screen_review	UAS_Chrimson_Venus_X_0070	A	Tue Jul 26 00:52:57 EDT 2016	130815	Fly Light	Sample#2297676546376204386	f		screen	Terra Incognita	Masayoshi Ito	JRC_IS00438-20160708_51_D3	Drosophila melanogaster	20x
IS00449	this paper	11B03-p65ADZp in attP40; MKRS/TM6B_18H11-ZpGdbd in attP2	20210507_48_D1	wangk11_is_screen_review	UAS_Chrimson_Venus_X_0070	A01	Fri May 28 08:46:06 EDT 2021	226966	Fly Light	Sample#2938134977113489506	f		screen	Dickson	Kaiyu Wang	JRC_IS00449-20210507_48_D1	Drosophila melanogaster	20x
IS00463	this paper	14E06-p65ADZp in attP40_10D10-ZpGdbd in attP2	20160121_53_B2	goldammerj_is_screen_review	UAS_Chrimson_Venus_X_0070	A04	Sat Feb 06 09:30:15 EST 2016	119649	Fly Light	Sample#2235853502016389157	f		screen	Terra Incognita	Jens Goldammer	JRC_IS00463-20160121_53_B2	Drosophila melanogaster	20x
IS00464	this paper	14E06-p65ADZp in attP40_91H11-ZpGdbd in attP2	20160129_53_A4	goldammerj_is_screen_review	UAS_Chrimson_Venus_X_0070	A00	Tue Feb 23 17:56:04 EST 2016	119650	Fly Light	Sample#2242141389984890978	f		screen	Terra Incognita	Jens Goldammer	JRC_IS00464-20160129_53_A4	Drosophila melanogaster	20x
IS00470	this paper	16E11-p65ADZp in attP40_18G01-ZpGdbd in attP2	20210430_43_A1	nerna_is_screen_review	UAS_Chrimson_Venus_X_0070	A01	Mon May 24 14:08:08 EDT 2021	226681	Fly Light	Sample#2936766469209325666	f		screen	Rubin	Aljoscha Nern	JRC_IS00470-20210430_43_A1	Drosophila melanogaster	20x
IS00485	this paper	22F02-p65ADZp in attP40; MKRS/TM6B_45G05-ZpGdbd in attP2	20160408_51_B2	rubing_itom10_is_screen_review	UAS_Chrimson_Venus_X_0070	A00	Mon Apr 25 16:39:06 EDT 2016	125167	Fly Light	Sample#2264574969268666442	f		screen	Terra Incognita	Masayoshi Ito	JRC_IS00485-20160408_51_B2	Drosophila melanogaster	20x
IS00509	this paper	26A02-p65ADZp in attP40_55A07-ZpGdbd in attP2	20161216_51_D6	rubing_itom10_is_screen_review	UAS_Chrimson_Venus_X_0070	A00	Tue Jan 10 08:29:49 EST 2017	142457	Fly Light	Sample#2358687781544263778	f		screen	Terra Incognita	Masayoshi Ito	JRC_IS00509-20161216_51_D6	Drosophila melanogaster	20x
IS00552	10.1101/404277	38D01-p65ADZp in attP40; MKRS/TM6B_45F12-ZpGdbd in attP2	20150918_52_B3	rubing_dolanm_is_screen_review	UAS_Chrimson_Venus_X_0070	A01	Fri Oct 02 15:22:47 EDT 2015	112408	Fly Light	Sample#2189903862905700450	f		screen	Terra Incognita	Michael-John Dolan	JRC_IS00552-20150918_52_B3	Drosophila melanogaster	20x
IS00725	this paper	50D07-p65ADZp in attP40; MKRS/TM6B_HAV5; Sco/CyO; 33H11-ZpGdbd in attP2	20151030_42_A5	ditp_is_screen_review	HAV5_X_0083	A01	Mon Nov 16 21:51:01 EST 2015	114803	Fly Light	Sample#2206324119371251810	f		screen	Descending Interneuron	Wyatt Korff	GMR_IS00725-20151030_42_A5	Drosophila melanogaster	20x
IS00726	this paper	25C08-p65ADZp in attP40; MKRS/TM6B_HAV5; Sco/CyO; 68A06-ZpGdbd in attP2	20151030_42_A6	ditp_is_screen_review	HAV5_X_0083	A01	Mon Nov 16 21:51:03 EST 2015	114804	Fly Light	Sample#2206324129257226338	f		screen	Descending Interneuron	Wyatt Korff	GMR_IS00726-20151030_42_A6	Drosophila melanogaster	20x
IS00729	this paper	58G11-p65ADZp in attP40; MKRS/TM6B_HAV5; Sco/CyO; 81D05-ZpGdbd in attP2	20151030_42_B1	ditp_is_screen_review	HAV5_X_0083	A01	Mon Nov 16 21:51:07 EST 2015	114799	Fly Light	Sample#2206324143777906786	f		screen	Descending Interneuron	Wyatt Korff	GMR_IS00729-20151030_42_B1	Drosophila melanogaster	20x
IS00732	this paper	14F03-p65ADZp in attP40; MKRS/TM6B_HAV5; Sco/CyO; 24C07-ZpGdbd in attP2	20151030_42_B4	ditp_is_screen_review	HAV5_X_0083	A01	Mon Nov 16 21:51:11 EST 2015	114802	Fly Light	Sample#2206324160139886690	f		screen	Descending Interneuron	Wyatt Korff	GMR_IS00732-20151030_42_B4	Drosophila melanogaster	20x
IS00735	this paper	49A07-p65ADZp; MKRS/TM6B_HAV5; Sco/CyO; 55A03-ZpGdbd in attP2	20151120_41_A1	ditp_is_screen_review	HAV5_X_0083	A01	Fri Dec 11 11:25:33 EST 2015	116182	Fly Light	Sample#2215226410362994725	f		screen	Descending Interneuron	Wyatt Korff	GMR_IS00735-20151120_41_A1	Drosophila melanogaster	20x
IS00857	this paper	VT062635-p65ADZ in attP40_VT002044-ZpGDBD in attP2	20150904_41_C6	ditp_is_screen_review	HAV5_X_0083	A01	Thu Oct 01 07:25:28 EDT 2015	111094	Fly Light	Sample#2189421354380427362	f		screen	Descending Interneuron	Shigehiro Namiki	JRC_IS00857-20150904_41_C6	Drosophila melanogaster	20x
IS00865	this paper	VT019060-p65ADZp in attP40_VT003280-ZpGDBD in attP2	20151106_41_A1	ditp_is_screen_review	HAV5_X_0083	A01	Thu Nov 19 10:20:33 EST 2015	115220	Fly Light	Sample#2207237522663145570	f		screen	Descending Interneuron	Wyatt Korff	BJD_IS00865-20151106_41_A1	Drosophila melanogaster	20x
IS00898	this paper	VT020033-p65ADZp in attP40_VT014208-ZpGDBD in attP2	20151106_41_A3	ditp_is_screen_review	HAV5_X_0083	A01	Thu Nov 19 10:20:34 EST 2015	115222	Fly Light	Sample#2207237523342622818	f		screen	Descending Interneuron	Wyatt Korff	BJD_IS00898-20151106_41_A3	Drosophila melanogaster	20x
IS00923	this paper	VT057470-p65ADZp in attP40_VT033947-ZpGdbd in attP2	20151120_41_A2	ditp_is_screen_review	HAV5_X_0083	A01	Fri Dec 11 11:25:33 EST 2015	116181	Fly Light	Sample#2215226410824368165	f		screen	Descending Interneuron	Wyatt Korff	BJD_IS00923-20151120_41_A2	Drosophila melanogaster	20x
IS00934	this paper	VT032898-p65ADZ in attP40_VT048835-ZpGDBD in attP2	20151106_41_B1	ditp_is_screen_review	HAV5_X_0083	A01	Thu Nov 19 10:20:34 EST 2015	115226	Fly Light	Sample#2207237524617691234	f		screen	Descending Interneuron	Wyatt Korff	BJD_IS00934-20151106_41_B1	Drosophila melanogaster	20x
IS00992	this paper	52F12-p65ADZp in attP40_52B07-ZpGdbd in attP2	20160129_44_E3	nerna_is_screen_review	HAV5_X_0083	A01	Tue Feb 23 17:58:01 EST 2016	120455	Fly Light	Sample#2242141881431490597	f		screen	Rubin	Aljoscha Nern	JRC_IS00992-20160129_44_E3	Drosophila melanogaster	20x
IS01023	this paper	65G07-p65ADZp in VK00027_51E09-ZpGdbd in attP2	20160729_44_B2	nerna_is_screen_review	UAS_Chrimson_Venus_X_0070	A01	Fri Sep 02 14:46:38 EDT 2016	131759	Fly Light	Sample#2311657088431947850	f		screen	Rubin	Aljoscha Nern	JRC_IS01023-20160729_44_B2	Drosophila melanogaster	20x
IS01038	this paper	14F03-p65ADZp in attP40; MKRS/TM6B_31C03-ZpGdbd in attP2	20210310_42_F1	nerna_is_screen_review	UAS_Chrimson_Venus_X_0070	A01	Wed Apr 14 17:15:28 EDT 2021	223154	Fly Light	Sample#2922318095584329826	f		screen	Rubin	Aljoscha Nern	JRC_IS01038-20210310_42_F1	Drosophila melanogaster	20x
IS01046	this paper	VT048835-p65ADZp in attP40_HAV5; Sco/CyO; 24C07-ZpGdbd in attP2	20151030_42_B5	ditp_is_screen_review	HAV5_X_0083	A01	Mon Nov 16 21:51:12 EST 2015	114783	Fly Light	Sample#2206324165370196066	f		screen	Descending Interneuron	Wyatt Korff	GMR_IS01046-20151030_42_B5	Drosophila melanogaster	20x
IS01051	this paper	VT019391-p65ADZ in attP40_VT028198-ZpGdbd in attP2	20151113_41_B6	ditp_is_screen_review	HAV5_X_0083	A01	Mon Nov 23 11:16:46 EST 2015	115812	Fly Light	Sample#2208701219818438754	f		screen	Descending Interneuron	Wyatt Korff	GMR_IS01051-20151113_41_B6	Drosophila melanogaster	20x
IS01052	this paper	VT056582-p65ADZp in attP40_HAV5; Sco/CyO; 22D06-ZpGAL4DBD in attP2	20151030_42_B6	ditp_is_screen_review	HAV5_X_0083	A01	Mon Nov 16 21:51:13 EST 2015	114785	Fly Light	Sample#2206324170659201122	f		screen	Descending Interneuron	Wyatt Korff	GMR_IS01052-20151030_42_B6	Drosophila melanogaster	20x
IS01053	this paper	VT063736-p65ADZp in attP40_HAV5; Sco/CyO; 24A03-ZpGdbd in attP2	20151030_42_C1	ditp_is_screen_review	HAV5_X_0083	A01	Mon Nov 16 21:51:13 EST 2015	114786	Fly Light	Sample#2206324171070242914	f		screen	Descending Interneuron	Wyatt Korff	GMR_IS01053-20151030_42_C1	Drosophila melanogaster	20x
IS01056	this paper	17A04-p65ADZp in attP40; MKRS/TM6B_HAV5; Sco/CyO; 24A03-ZpGdbd in attP2	20151030_42_C2	ditp_is_screen_review	HAV5_X_0083	A01	Mon Nov 16 21:51:14 EST 2015	114781	Fly Light	Sample#2206324171661639778	f		screen	Descending Interneuron	Wyatt Korff	GMR_IS01056-20151030_42_C2	Drosophila melanogaster	20x
IS01057	this paper	w; 20C05-p65ADZp; MKRS/ TM6B_85H06-ZpGdbd in attP2	20151030_42_C3	ditp_is_screen_review	HAV5_X_0083	A01	Mon Nov 16 21:51:14 EST 2015	114787	Fly Light	Sample#2206324172013961314	f		screen	Descending Interneuron	Wyatt Korff	GMR_IS01057-20151030_42_C3	Drosophila melanogaster	20x
IS01058	this paper	21C05-p65ADZp in attP40; MKRS/TM6B_HAV5; Sco/CyO; 28E01-ZpGdbd in attP2	20151030_42_C4	ditp_is_screen_review	HAV5_X_0083	A01	Mon Nov 16 21:51:15 EST 2015	114789	Fly Light	Sample#2206324177416224866	f		screen	Descending Interneuron	Wyatt Korff	GMR_IS01058-20151030_42_C4	Drosophila melanogaster	20x
IS01059	this paper	w; 21F01-p65ADZp; MKRS/TM6B_HAV5; Sco/CyO; 22D06-ZpGAL4DBD in attP2	20151030_42_C5	ditp_is_screen_review	HAV5_X_0083	A01	Mon Nov 16 21:51:17 EST 2015	114790	Fly Light	Sample#2206324187369308258	f		screen	Descending Interneuron	Wyatt Korff	GMR_IS01059-20151030_42_C5	Drosophila melanogaster	20x
IS01061	this paper	22H02-p65ADZp in attP40; MKRS/TM6B_HAV5; Sco/CyO; 20F03-ZpGdbd in attP2	20151030_42_D1	ditp_is_screen_review	HAV5_X_0083	A01	Mon Nov 16 21:51:19 EST 2015	114792	Fly Light	Sample#2206324192779960418	f		screen	Descending Interneuron	Wyatt Korff	GMR_IS01061-20151030_42_D1	Drosophila melanogaster	20x
IS01063	this paper	24F06-p65ADZp in attP40_HAV5; Sco/CyO; 45E06-ZpGdbd in attP2	20151030_42_D2	ditp_is_screen_review	HAV5_X_0083	A01	Mon Nov 16 21:51:21 EST 2015	114793	Fly Light	Sample#2206324202418471010	f		screen	Descending Interneuron	Wyatt Korff	GMR_IS01063-20151030_42_D2	Drosophila melanogaster	20x
IS01064	this paper	27E07-p65ADZp; MKRS/TM6B_HAV5; Sco/CyO; 14D01-ZpGdbd in attP2/ TM3	20151030_42_D3	ditp_is_screen_review	HAV5_X_0083	A01	Mon Nov 16 21:51:23 EST 2015	114782	Fly Light	Sample#2206324212694515810	f		screen	Descending Interneuron	Wyatt Korff	GMR_IS01064-20151030_42_D3	Drosophila melanogaster	20x
IS01066	this paper	w; 30C12-p65ADZp; MKRS/TM6B_HAV5; Sco/CyO; 22D06-ZpGAL4DBD in attP2	20151030_42_D4	ditp_is_screen_review	HAV5_X_0083	A01	Mon Nov 16 21:51:25 EST 2015	114794	Fly Light	Sample#2206324217631211618	f		screen	Descending Interneuron	Wyatt Korff	GMR_IS01066-20151030_42_D4	Drosophila melanogaster	20x
IS01069	this paper	38H06-p65ADZp in attP40; MKRS/TM6B_VT018689-ZpGdbd in attP2	20151030_42_D5	ditp_is_screen_review	HAV5_X_0083	A01	Mon Nov 16 21:51:25 EST 2015	114788	Fly Light	Sample#2206324217970954338	f		screen	Descending Interneuron	Wyatt Korff	GMR_IS01069-20151030_42_D5	Drosophila melanogaster	20x
IS01072	this paper	42B02-p65ADZp in attP40; MKRS/TM6B_HAV5; CyO/Sco; 65C02-ZpGDBD in attP2	20151030_42_D6	ditp_is_screen_review	HAV5_X_0083	A01	Mon Nov 16 21:51:25 EST 2015	114795	Fly Light	Sample#2206324218306498658	f		screen	Descending Interneuron	Wyatt Korff	GMR_IS01072-20151030_42_D6	Drosophila melanogaster	20x
IS01074	this paper	42B02-p65ADZp in attP40; MKRS/TM6B_HAV5; Sco/CyO; 89B01-ZpGdbd in attP2	20151030_42_E1	ditp_is_screen_review	HAV5_X_0083	A01	Mon Nov 16 21:51:29 EST 2015	114796	Fly Light	Sample#2206324237373800546	f		screen	Descending Interneuron	Wyatt Korff	GMR_IS01074-20151030_42_E1	Drosophila melanogaster	20x
IS01080	this paper	w; 84B12-p65ADZp; MKRS/TM6B_VT048835-ZpGDBD in attP2	20151030_42_E4	ditp_is_screen_review	HAV5_X_0083	A01	Mon Nov 16 21:51:29 EST 2015	114784	Fly Light	Sample#2206324238367850594	f		screen	Descending Interneuron	Wyatt Korff	GMR_IS01080-20151030_42_E4	Drosophila melanogaster	20x
IS01081	this paper	w; 91C05-p65ADZ; MKRS/TM6B_HAV5; CyO/Sco; 31B08-ZpGdbd	20151030_42_E5	ditp_is_screen_review	HAV5_X_0083	A01	Mon Nov 16 21:51:30 EST 2015	114780	Fly Light	Sample#2206324238703394914	f		screen	Descending Interneuron	Wyatt Korff	GMR_IS01081-20151030_42_E5	Drosophila melanogaster	20x
IS01113	this paper	VT050157-p65ADZp in attP40_VT058720-ZpGDBD in attP2	20161014_43_J6	asoy_is_screen_review	UAS_Chrimson_Venus_X_0070	A01	Thu Nov 10 16:29:04 EST 2016	136529	Fly Light	Sample#2336702731047141521	f		screen	Rubin	Yoshi Aso	JRC_IS01113-20161014_43_J6	Drosophila melanogaster	20x
IS01193	this paper	65B09-p65ADZp in attP40; MKRS/TM6B_VT027955-ZpGdbd in attP2	20210625_48_A3	rubing_is_screen_review	UAS_Chrimson_Venus_X_0070	A01	Wed Jul 07 09:47:14 EDT 2021	230606	Fly Light	Sample#2952645875349848162	f		screen	Rubin	Gerry Rubin	JRC_IS01193-20210625_48_A3	Drosophila melanogaster	20x
IS01244	this paper	VT037491-p65ADZ in attP40_14C08-ZpGdbd/ TM3 in attP2	20190809_41_B2	rubing_is_screen_review	UAS_Chrimson_Venus_X_0070	A01	Fri Aug 23 13:41:08 EDT 2019	197445	Fly Light	Sample#2704831441404952674	f		screen	Rubin	Gerry Rubin	JRC_IS01244-20190809_41_B2	Drosophila melanogaster	20x
IS01270	this paper	w; 21C08-p65ADZp; MKRS/ TM6B_20H08-ZpGdbd in attP2	20210702_48_C3	asoy_is_screen_review	UAS_Chrimson_Venus_X_0070	A01	Tue Jul 27 15:20:39 EDT 2021	231289	Fly Light	Sample#2959977539117776994	f		screen	Aso	Yoshi Aso	JRC_IS01270-20210702_48_C3	Drosophila melanogaster	20x
IS01286	this paper	28A12-p65ADZp; MKRS/TM6B_HAV5; CyO/Sco; 22E06-ZpGDBD in attP2	20210326_48_E1	minegishir_is_screen_review	UAS_Chrimson_Venus_X_0070	A01	Fri Apr 09 16:58:42 EDT 2021	224057	Fly Light	Sample#2920501938900435042	f		screen	Dickson	Ryo Minegishi	JRC_IS01286-20210326_48_E1	Drosophila melanogaster	20x
IS01378	this paper	w; 52E12-p65ADZp; MKRS/ TM6B_HAV5; CyO/Sco; 57F07-ZpGDBD in attP2	20170728_45_F4	dicksonb_is_screen_review	UAS_Chrimson_Venus_X_0070	A01	Tue Aug 22 14:48:22 EDT 2017	156460	Fly Light	Sample#2439942830823571554	m		screen	Dickson	Ryo Minegishi	JRC_IS01378-20170728_45_F4	Drosophila melanogaster	20x
IS01540	this paper	VT023490-p65ADZp in attP40_HAV5; CyO/Sp; 38F04-ZpGDBD in attP2	20151106_41_E1	ditp_is_screen_review	HAV5_X_0083	A01	Thu Nov 19 10:20:35 EST 2015	115244	Fly Light	Sample#2207237529759907938	f		screen	Descending Interneuron	Wyatt Korff	GMR_IS01540-20151106_41_E1	Drosophila melanogaster	20x
IS01541	this paper	VT028606-p65ADZ in attP40_HAV5; Sco/CyO; 56G08-ZpGdbd in attP2	20151106_41_C1	ditp_is_screen_review	HAV5_X_0083	A01	Thu Nov 19 10:20:34 EST 2015	115232	Fly Light	Sample#2207237526454796386	f		screen	Descending Interneuron	Wyatt Korff	GMR_IS01541-20151106_41_C1	Drosophila melanogaster	20x
IS01542	this paper	VT028606-p65ADZ in attP40_HAV5; Sco/CyO; 87B09-ZpGdbd in attP2	20151106_41_E3	ditp_is_screen_review	HAV5_X_0083	A01	Thu Nov 19 10:20:35 EST 2015	115247	Fly Light	Sample#2207237530061897826	f		screen	Descending Interneuron	Wyatt Korff	GMR_IS01542-20151106_41_E3	Drosophila melanogaster	20x
IS01543	this paper	VT043288-p65ADZp in attP40_VT028153-ZpGDBD in attP2	20151113_41_B5	ditp_is_screen_review	HAV5_X_0083	A01	Mon Nov 23 11:16:46 EST 2015	115811	Fly Light	Sample#2208701219390619746	f		screen	Descending Interneuron	Wyatt Korff	GMR_IS01543-20151113_41_B5	Drosophila melanogaster	20x
IS01544	this paper	VT048835-p65ADZp in attP40_VT017647-ZpGdbd in attP2	20151113_41_A2	ditp_is_screen_review	HAV5_X_0083	A01	Mon Nov 23 11:16:45 EST 2015	115802	Fly Light	Sample#2208701215447973986	f		screen	Descending Interneuron	Wyatt Korff	GMR_IS01544-20151113_41_A2	Drosophila melanogaster	20x
IS01546	this paper	VT040698-p65ADZp in attP40_VT028606-ZpGdbd in attP2	20151120_41_A3	ditp_is_screen_review	HAV5_X_0083	A01	Fri Dec 11 11:25:33 EST 2015	116151	Fly Light	Sample#2215226411256381477	f		screen	Descending Interneuron	Wyatt Korff	GMR_IS01546-20151120_41_A3	Drosophila melanogaster	20x
IS01547	this paper	VT049363-p65ADZp in attP40_VT057283-ZpGDBD in attP2	20151120_41_A5	ditp_is_screen_review	HAV5_X_0083	A01	Fri Dec 11 11:25:33 EST 2015	116160	Fly Light	Sample#2215226412132991013	f		screen	Descending Interneuron	Wyatt Korff	GMR_IS01547-20151120_41_A5	Drosophila melanogaster	20x
IS01549	this paper	VT029814-p65ADZp in attP40_VT003280-ZpGDBD in attP2	20151120_41_A4	ditp_is_screen_review	HAV5_X_0083	A01	Fri Dec 11 11:25:33 EST 2015	116158	Fly Light	Sample#2215226411688394789	f		screen	Descending Interneuron	Wyatt Korff	GMR_IS01549-20151120_41_A4	Drosophila melanogaster	20x
IS01550	this paper	VT037583-p65ADZ in attP40_VT025598-ZpGdbd in attP2	20151120_41_A6	ditp_is_screen_review	HAV5_X_0083	A01	Fri Dec 11 11:25:33 EST 2015	116155	Fly Light	Sample#2215226412573392933	f		screen	Descending Interneuron	Wyatt Korff	GMR_IS01550-20151120_41_A6	Drosophila melanogaster	20x
IS01552	this paper	VT061919-p65ADZp in attP40_VT040698-ZpGdbd in attP2	20151120_41_B1	ditp_is_screen_review	HAV5_X_0083	A01	Fri Dec 11 11:25:33 EST 2015	116150	Fly Light	Sample#2215226413127041061	f		screen	Descending Interneuron	Wyatt Korff	GMR_IS01552-20151120_41_B1	Drosophila melanogaster	20x
IS01553	this paper	VT003476-p65ADZp in attP40_HAV5; Sco/CyO; 89A03-ZpGdbd in attP2	20151106_41_D2	ditp_is_screen_review	HAV5_X_0083	A01	Thu Nov 19 10:20:35 EST 2015	115239	Fly Light	Sample#2207237528270930018	f		screen	Descending Interneuron	Wyatt Korff	GMR_IS01553-20151106_41_D2	Drosophila melanogaster	20x
IS01554	this paper	VT063736-p65ADZp in attP40_VT017647-ZpGdbd in attP2	20151106_41_C2	ditp_is_screen_review	HAV5_X_0083	A01	Thu Nov 19 10:20:34 EST 2015	115233	Fly Light	Sample#2207237526756786274	f		screen	Descending Interneuron	Wyatt Korff	GMR_IS01554-20151106_41_C2	Drosophila melanogaster	20x
IS01556	this paper	11E07-p65ADZp in attP40; MKRS/TM6B_77F05-ZpGdbd in attP2	20151120_41_B2	ditp_is_screen_review	HAV5_X_0083	A01	Fri Dec 11 11:25:33 EST 2015	116159	Fly Light	Sample#2215226413563248677	f		screen	Descending Interneuron	Wyatt Korff	GMR_IS01556-20151120_41_B2	Drosophila melanogaster	20x
IS01557	this paper	w; 13D04-p65ADZp; MKRS/TM6B_HAV5; Sco/CyO; 65D05-ZpGdbd in attP2	20151106_41_E4	ditp_is_screen_review	HAV5_X_0083	A01	Thu Nov 19 10:20:35 EST 2015	115248	Fly Light	Sample#2207237530485522530	f		screen	Descending Interneuron	Wyatt Korff	GMR_IS01557-20151106_41_E4	Drosophila melanogaster	20x
IS01559	this paper	w; 29F12-p65ADZp; MKRS/TM6B_HAV5; Sco/CyO; 88C07-ZpGdbd in attP2	20151113_41_B1	ditp_is_screen_review	HAV5_X_0083	A01	Mon Nov 23 11:16:45 EST 2015	115807	Fly Light	Sample#2208701217662566498	f		screen	Descending Interneuron	Wyatt Korff	GMR_IS01559-20151113_41_B1	Drosophila melanogaster	20x
IS01560	this paper	31H10-p65ADZp; MKRS/TM6B_VT040698-ZpGdbd in attP2	20151120_41_B4	ditp_is_screen_review	HAV5_X_0083	A01	Fri Dec 11 11:25:34 EST 2015	116154	Fly Light	Sample#2215226414452441125	f		screen	Descending Interneuron	Wyatt Korff	GMR_IS01560-20151120_41_B4	Drosophila melanogaster	20x
IS01561	this paper	42B02-p65ADZp in attP40; MKRS/TM6B_VT011148-ZpGDBD in attP2	20160122_42_A1	ditp_is_screen_review	HAV5_X_0083	A01	Mon Feb 08 12:56:07 EST 2016	120005	Fly Light	Sample#2236630087808057381	f		screen	Descending Interneuron	Wyatt Korff	JRC_IS01561-20160122_42_A1	Drosophila melanogaster	20x
IS01562	this paper	42B02-p65ADZp in attP40; MKRS/TM6B_VT039465-ZpGdbd in attP2	20151120_41_B5	ditp_is_screen_review	HAV5_X_0083	A01	Fri Dec 11 11:25:34 EST 2015	116161	Fly Light	Sample#2215226414880260133	f		screen	Descending Interneuron	Wyatt Korff	GMR_IS01562-20151120_41_B5	Drosophila melanogaster	20x
IS01564	this paper	44A07-p65ADZp; MKRS/TM6B_VT045150-ZpGdbd in attP2	20151113_41_A1	ditp_is_screen_review	HAV5_X_0083	A01	Mon Nov 23 11:16:45 EST 2015	115801	Fly Light	Sample#2208701215028543586	f		screen	Descending Interneuron	Wyatt Korff	GMR_IS01564-20151113_41_A1	Drosophila melanogaster	20x
IS01565	this paper	60B11-p65ADZp in attP40; MKRS/TM6B_HAV5; Sco/CyO; 83B04-ZpGdbd in attP2	20151106_41_D1	ditp_is_screen_review	HAV5_X_0083	A01	Thu Nov 19 10:20:35 EST 2015	115238	Fly Light	Sample#2207237527968940130	f		screen	Descending Interneuron	Wyatt Korff	GMR_IS01565-20151106_41_D1	Drosophila melanogaster	20x
IS01566	this paper	66B05-p65ADZp in attP40; MKRS/TM6B_85H06-ZpGdbd in attP2	20151120_41_B3	ditp_is_screen_review	HAV5_X_0083	A01	Fri Dec 11 11:25:34 EST 2015	116157	Fly Light	Sample#2215226414007844901	f		screen	Descending Interneuron	Wyatt Korff	GMR_IS01566-20151120_41_B3	Drosophila melanogaster	20x
IS01569	this paper	VT012639-p65ADZp in attP40_VT045791-ZpGDBD in attP2	20151113_41_B2	ditp_is_screen_review	HAV5_X_0083	A01	Mon Nov 23 11:16:46 EST 2015	115809	Fly Light	Sample#2208701218081996898	f		screen	Descending Interneuron	Wyatt Korff	GMR_IS01569-20151113_41_B2	Drosophila melanogaster	20x
IS01570	this paper	VT012639-p65ADZp in attP40_VT034795-ZpGDBD in attP2	20151113_41_A4	ditp_is_screen_review	HAV5_X_0083	A01	Mon Nov 23 11:16:45 EST 2015	115804	Fly Light	Sample#2208701216257474658	f		screen	Descending Interneuron	Wyatt Korff	GMR_IS01570-20151113_41_A4	Drosophila melanogaster	20x
IS01571	this paper	VT028606-p65ADZ in attP40_VT008675-ZpGdbd in attP2	20151106_41_E2	ditp_is_screen_review	HAV5_X_0083	A01	Thu Nov 19 10:20:33 EST 2015	115245	Fly Light	Sample#2207237522365349986	f		screen	Descending Interneuron	Wyatt Korff	GMR_IS01571-20151106_41_E2	Drosophila melanogaster	20x
IS01572	this paper	VT048835-p65ADZp in attP40_VT017682-ZpGDBD in attP2	20151106_41_C6	ditp_is_screen_review	HAV5_X_0083	A01	Thu Nov 19 10:20:35 EST 2015	115237	Fly Light	Sample#2207237527675338850	f		screen	Descending Interneuron	Wyatt Korff	GMR_IS01572-20151106_41_C6	Drosophila melanogaster	20x
IS01574	this paper	VT045148-p65ADZp in attP40_VT045150-ZpGdbd in attP2	20151113_41_C1	ditp_is_screen_review	HAV5_X_0083	A01	Mon Nov 23 11:16:46 EST 2015	115813	Fly Light	Sample#2208701220271423586	f		screen	Descending Interneuron	Wyatt Korff	GMR_IS01574-20151113_41_C1	Drosophila melanogaster	20x
IS01575	this paper	VT001615-p65ADZ in attP40_VT026017-ZpGDBD in attP2	20151106_41_E5	ditp_is_screen_review	HAV5_X_0083	A01	Thu Nov 19 10:20:35 EST 2015	115249	Fly Light	Sample#2207237530783318114	f		screen	Descending Interneuron	Wyatt Korff	GMR_IS01575-20151106_41_E5	Drosophila melanogaster	20x
IS01576	this paper	VT001615-p65ADZ in attP40_HAV5; Sco/CyO; 70C05-ZpGdbd in attP2	20151113_41_A3	ditp_is_screen_review	HAV5_X_0083	A01	Mon Nov 23 11:16:45 EST 2015	115803	Fly Light	Sample#2208701215850627170	f		screen	Descending Interneuron	Wyatt Korff	GMR_IS01576-20151113_41_A3	Drosophila melanogaster	20x
IS01579	this paper	VT037583-p65ADZ in attP40_HAV5; CyO/Sco; 81C11-ZpGdbd	20151106_41_D5	ditp_is_screen_review	HAV5_X_0083	A01	Thu Nov 19 10:20:35 EST 2015	115242	Fly Light	Sample#2207237529151733858	f		screen	Descending Interneuron	Wyatt Korff	GMR_IS01579-20151106_41_D5	Drosophila melanogaster	20x
IS01585	this paper	10A07-p65ADZp in attP40_HAV5; CyO/Sp; 24D07-ZpGDBD in attP2	20160722_51_A5	rubing_itom10_is_screen_review	UAS_Chrimson_Venus_X_0070	A00	Wed Aug 10 07:24:25 EDT 2016	131560	Fly Light	Sample#2303210878985568330	f		screen	Terra Incognita	Masayoshi Ito	JRC_IS01585-20160722_51_A5	Drosophila melanogaster	20x
IS01587	this paper	w; 11H10-p65ADZp; MKRS/TM6B_VT033947-ZpGdbd in attP2	20160122_42_A2	ditp_is_screen_review	HAV5_X_0083	A01	Mon Feb 08 12:56:07 EST 2016	120006	Fly Light	Sample#2236630088256847909	f		screen	Descending Interneuron	Wyatt Korff	JRC_IS01587-20160122_42_A2	Drosophila melanogaster	20x
IS01589	this paper	w; 20C03-p65ADZp; MKRS/TM6B_HAV5; CyO/Sp; 23C07-ZpGDBD in attP2	20151113_41_B3	ditp_is_screen_review	HAV5_X_0083	A01	Mon Nov 23 11:16:46 EST 2015	115810	Fly Light	Sample#2208701218534981730	f		screen	Descending Interneuron	Wyatt Korff	GMR_IS01589-20151113_41_B3	Drosophila melanogaster	20x
IS01590	this paper	w; 20C03-p65ADZp; MKRS/TM6B_HAV5; CyO/Sco; 31B08-ZpGdbd	20151113_41_A5	ditp_is_screen_review	HAV5_X_0083	A01	Mon Nov 23 11:16:45 EST 2015	115805	Fly Light	Sample#2208701216760791138	f		screen	Descending Interneuron	Wyatt Korff	GMR_IS01590-20151113_41_A5	Drosophila melanogaster	20x
IS01593	this paper	27E07-p65ADZp; MKRS/TM6B_HAV5; Sco/CyO; 20F03-ZpGdbd in attP2	20151106_41_C3	ditp_is_screen_review	HAV5_X_0083	A01	Thu Nov 19 10:20:33 EST 2015	115234	Fly Light	Sample#2207237522054971490	f		screen	Descending Interneuron	Wyatt Korff	GMR_IS01593-20151106_41_C3	Drosophila melanogaster	20x
IS01596	this paper	w; 29F12-p65ADZp; MKRS/TM6B_HAV5; CyO/Sp; 37G07-ZpGDBD in attP2	20151106_41_D6	ditp_is_screen_review	HAV5_X_0083	A01	Thu Nov 19 10:20:35 EST 2015	115243	Fly Light	Sample#2207237529457918050	f		screen	Descending Interneuron	Wyatt Korff	GMR_IS01596-20151106_41_D6	Drosophila melanogaster	20x
IS01597	this paper	42B02-p65ADZp in attP40; MKRS/TM6B_VT026005-ZpGDBD in attP2	20151120_41_B6	ditp_is_screen_review	HAV5_X_0083	A01	Fri Dec 11 11:25:34 EST 2015	116156	Fly Light	Sample#2215226415320662053	f		screen	Descending Interneuron	Wyatt Korff	GMR_IS01597-20151120_41_B6	Drosophila melanogaster	20x
IS01599	this paper	47D05-p65ADZp in attP40_39H12-ZpGdbd in attP2	20210611_45_C6	ditp_is_screen_review	UAS_Chrimson_Venus_X_0070	A01	Fri Jul 02 09:57:37 EDT 2021	229837	Fly Light	Sample#2950836551115866210	f		screen	Descending Interneuron	Shigehiro Namiki	JRC_IS01599-20210611_45_C6	Drosophila melanogaster	20x
IS01602	this paper	64B03-p65ADZp in attP40; MKRS/TM6B_HAV5; Sco/CyO; 29G08-ZpGdbd in attP2	20151106_41_C5	ditp_is_screen_review	HAV5_X_0083	A01	Thu Nov 19 10:20:35 EST 2015	115236	Fly Light	Sample#2207237527364960354	f		screen	Descending Interneuron	Wyatt Korff	GMR_IS01602-20151106_41_C5	Drosophila melanogaster	20x
IS01604	this paper	73A05-p65ADZp in attP40; MKRS/TM6B_VT012287-ZpGdbd in attP2	20151120_41_C1	ditp_is_screen_review	HAV5_X_0083	A01	Fri Dec 11 11:25:34 EST 2015	116152	Fly Light	Sample#2215226415756869669	f		screen	Descending Interneuron	Wyatt Korff	GMR_IS01604-20151120_41_C1	Drosophila melanogaster	20x
IS01869	this paper	76G04-p65ADZp in attP40; MKRS/TM6B_VT039458-ZpGDBD in attP2	20161014_42_A5	asoy_is_screen_review	UAS_Chrimson_Venus_X_0070	A01	Thu Nov 10 16:29:02 EST 2016	136464	Fly Light	Sample#2336702722591424657	f		screen	Rubin	Yoshi Aso	JRC_IS01869-20161014_42_A5	Drosophila melanogaster	20x
IS01876	this paper	64D11-p65ADZp in attP40_HAV5; CyO/Sp; 24D07-ZpGDBD in attP2	20160722_51_A3	rubing_itom10_is_screen_review	UAS_Chrimson_Venus_X_0070	A00	Wed Aug 10 07:24:25 EDT 2016	131577	Fly Light	Sample#2303210878679384138	f		screen	Terra Incognita	Masayoshi Ito	JRC_IS01876-20160722_51_A3	Drosophila melanogaster	20x
IS01925	this paper	15A01-p65ADZp in attP40_VT023749-ZpGDBD in attP2	20160205_51_J6	rubing_itom10_is_screen_review	UAS_Chrimson_Venus_X_0070	A01	Wed Mar 02 00:12:46 EST 2016	121522	Fly Light	Sample#2244772906565369930	f		screen	Terra Incognita	Masayoshi Ito	JRC_IS01925-20160205_51_J6	Drosophila melanogaster	20x
IS01926	this paper	15A01-p65ADZp in attP40_VT032899-ZpGDBD in attP2	20160205_51_H2	rubing_itom10_is_screen_review	UAS_Chrimson_Venus_X_0070	A01	Wed Mar 02 00:12:45 EST 2016	121523	Fly Light	Sample#2244772902685638730	f		screen	Terra Incognita	Masayoshi Ito	JRC_IS01926-20160205_51_H2	Drosophila melanogaster	20x
IS01934	this paper	VT008657-p65ADZp in attP40_21E02-ZpGdbd in attP2	20151002_42_E2	nerna_is_screen_review	UAS_Chrimson_Venus_X_0070	A01	Wed Oct 21 14:02:27 EDT 2015	112662	Fly Light	Sample#2196769014330425442	f		screen	Rubin	Aljoscha Nern	JRC_IS01934-20151002_42_E2	Drosophila melanogaster	20x
IS01965	this paper	VT043086-p65ADZp in attP40_VT047755-ZpGdbd in attP2	20180316_43_H4	ditp_is_screen_review	UAS_Chrimson_Venus_X_0070	A01	Mon Apr 02 15:06:08 EDT 2018	167640	Fly Light	Sample#2520759795934298210	f		screen	Descending Interneuron	Erica Ehrhardt	JRC_IS01965-20180316_43_H4	Drosophila melanogaster	20x
IS01978	this paper	VT054895-p65ADZ in attP40_38E08-ZpGdbd in attP2	20190816_41_D4	rubing_wolfft_is_screen_review	UAS_Chrimson_Venus_X_0070	A01	Fri Aug 30 15:56:17 EDT 2019	197889	Fly Light	Sample#2707402164778565730	f		screen	Rubin	Tanya Wolff	JRC_IS01978-20190816_41_D4	Drosophila melanogaster	20x
IS02019	this paper	VT010661-p65ADZp in attP40_VT064570-ZpGDBD in attP2	20210219_43_F3	nerna_is_screen_review	UAS_Chrimson_Venus_X_0070	A01	Tue Mar 09 13:31:11 EST 2021	222000	Fly Light	Sample#2909230791449903202	f		screen	Rubin	Aljoscha Nern	JRC_IS02019-20210219_43_F3	Drosophila melanogaster	20x
IS02067	this paper	72H06-p65ADZp in attP40_47B02-ZpGdbd in attP2	20151023_43_D3	nerna_is_screen_review	HAV5_X_0083	A01	Mon Nov 09 16:16:24 EST 2015	113770	Fly Light	Sample#2203703195610382410	f		screen	Rubin	Aljoscha Nern	JRC_IS02067-20151023_43_D3	Drosophila melanogaster	20x
IS02068	this paper	72H06-p65ADZp in attP40_93B10-ZpGdbd in attP2	20151023_43_G3	nerna_is_screen_review	HAV5_X_0083	A01	Mon Nov 09 16:16:27 EST 2015	113771	Fly Light	Sample#2203703206666567754	f		screen	Rubin	Aljoscha Nern	JRC_IS02068-20151023_43_G3	Drosophila melanogaster	20x
IS02070	this paper	w; 18C12-p65ADZp; MKRS/TM6B_VT058437-ZpGDBD in attP2	20210507_42_G3	schretterc_is_screen_review	UAS_Chrimson_Venus_X_0070	A01	Thu May 20 14:26:39 EDT 2021	227152	Fly Light	Sample#2935321574825263202	f		screen	Rubin	Katie Schretter	JRC_IS02070-20210507_42_G3	Drosophila melanogaster	20x
IS02079	this paper	83H01-p65ADZp in attP40; MKRS/TM6B_20A03-ZpGdbd in attP2	20210507_49_G2	wangk11_is_screen_review	UAS_Chrimson_Venus_X_0070	A01	Wed Jun 02 09:35:05 EDT 2021	226958	Fly Light	Sample#2939959245359022178	f		screen	Dickson	Kaiyu Wang	JRC_IS02079-20210507_49_G2	Drosophila melanogaster	20x
IS02111	this paper	VT059225-p65ADZp in attP40_VT057283-ZpGDBD in attP2	20151113_41_D2	ditp_is_screen_review	HAV5_X_0083	A01	Mon Nov 23 11:16:47 EST 2015	115820	Fly Light	Sample#2208701223152910434	f		screen	Descending Interneuron	Wyatt Korff	BJD_IS02111-20151113_41_D2	Drosophila melanogaster	20x
IS02202	this paper	VT016127-p65ADZp in attP40_11F03-ZpGdbd in attP2	20181130_48_C1	rubing_wolfft_is_screen_review	UAS_Chrimson_Venus_X_0070	A01	Tue Dec 18 16:27:51 EST 2018	182459	Fly Light	Sample#2615016303932473442	f		screen	Rubin	Tanya Wolff	JRC_IS02202-20181130_48_C1	Drosophila melanogaster	20x
IS02244	this paper	VT019742-p65ADZp in attP40_37H01-ZpGdbd in attP2	20210409_44_E2	rubing_wolfft_is_screen_review	UAS_Chrimson_Venus_X_0070	A01	Fri May 07 16:06:39 EDT 2021	225151	Fly Light	Sample#2930635700019658850	f		screen	Rubin	Tanya Wolff	JRC_IS02244-20210409_44_E2	Drosophila melanogaster	20x
IS02257	this paper	10A07-p65ADZp in attP40_VT057470-ZpGdbd in attP2	20161118_51_D3	goldammerj_is_screen_review	UAS_Chrimson_Venus_X_0070	A00	Tue Dec 06 06:17:56 EST 2016	139937	Fly Light	Sample#2345971017316302946	f		screen	Terra Incognita	Jens Goldammer	JRC_IS02257-20161118_51_D3	Drosophila melanogaster	20x
IS02259	this paper	VT027166-p65ADZp in attP40_VT009857-ZpGDBD in attP2	20151030_42_A1	ditp_is_screen_review	HAV5_X_0083	A01	Mon Nov 16 21:50:44 EST 2015	114806	Fly Light	Sample#2206324049175380066	f		screen	Descending Interneuron	Wyatt Korff	BJD_IS02259-20151030_42_A1	Drosophila melanogaster	20x
IS02275	this paper	VT047747-p65ADZ in attP40_VT037825-ZpGdbd in attP2	20151120_41_C2	ditp_is_screen_review	HAV5_X_0083	A01	Fri Dec 11 11:25:34 EST 2015	116164	Fly Light	Sample#2215226416201465893	f		screen	Descending Interneuron	Wyatt Korff	BJD_IS02275-20151120_41_C2	Drosophila melanogaster	20x
IS02275	this paper	VT047747-p65ADZ in attP40_VT037825-ZpGdbd in attP2	20200313_45_C5	ditp_is_screen_review	UAS_Chrimson_Venus_X_0070	A	Wed Jul 08 11:04:09 EDT 2020	210203	Fly Light	Sample#2820756051052200034	f		screen	Descending Interneuron	Shigehiro Namiki	JRC_IS02275-20200313_45_C5	Drosophila melanogaster	20x
IS02276	this paper	VT029814-p65ADZp in attP40_VT047755-ZpGdbd in attP2	20151113_41_D1	ditp_is_screen_review	HAV5_X_0083	A01	Mon Nov 23 11:16:47 EST 2015	115819	Fly Light	Sample#2208701222758645858	f		screen	Descending Interneuron	Wyatt Korff	BJD_IS02276-20151113_41_D1	Drosophila melanogaster	20x
IS02278	this paper	VT049363-p65ADZp in attP40_VT059225-ZpGdbd in attP2	20151120_41_C3	ditp_is_screen_review	HAV5_X_0083	A01	Fri Dec 11 11:25:34 EST 2015	116162	Fly Light	Sample#2215226416662839333	f		screen	Descending Interneuron	Wyatt Korff	BJD_IS02278-20151120_41_C3	Drosophila melanogaster	20x
IS02279	this paper	VT020033-p65ADZp in attP40_VT008483-ZpGDBD in attP2	20151030_42_A2	ditp_is_screen_review	HAV5_X_0083	A01	Mon Nov 16 21:50:44 EST 2015	114809	Fly Light	Sample#2206324049502535778	f		screen	Descending Interneuron	Wyatt Korff	BJD_IS02279-20151030_42_A2	Drosophila melanogaster	20x
IS02285	this paper	VT059450-p65ADZp in attP40_VT043626-ZpGdbd in attP2	20151030_42_A3	ditp_is_screen_review	HAV5_X_0083	A01	Mon Nov 16 21:50:48 EST 2015	114808	Fly Light	Sample#2206324064845299810	f		screen	Descending Interneuron	Wyatt Korff	BJD_IS02285-20151030_42_A3	Drosophila melanogaster	20x
IS02299	this paper	10A12-p65ADZp in attP40; MKRS/TM6B_VT004455-ZpGDBD in attP2	20151113_41_C2	ditp_is_screen_review	HAV5_X_0083	A01	Mon Nov 23 11:16:46 EST 2015	115814	Fly Light	Sample#2208701220682465378	f		screen	Descending Interneuron	Wyatt Korff	GMR_IS02299-20151113_41_C2	Drosophila melanogaster	20x
IS02310	this paper	VT047755-p65ADZp in attP40_VT025718-ZpGDBD in attP2	20151106_41_B2	ditp_is_screen_review	HAV5_X_0083	A01	Thu Nov 19 10:20:34 EST 2015	115227	Fly Light	Sample#2207237524940652642	f		screen	Descending Interneuron	Wyatt Korff	BJD_IS02310-20151106_41_B2	Drosophila melanogaster	20x
IS02316	this paper	14H09-p65ADZp in attP40; MKRS/TM6B_VT032228-ZpGdbd in attP2	20151113_41_C3	ditp_is_screen_review	HAV5_X_0083	A01	Mon Nov 23 11:16:46 EST 2015	115815	Fly Light	Sample#2208701221097701474	f		screen	Descending Interneuron	Wyatt Korff	GMR_IS02316-20151113_41_C3	Drosophila melanogaster	20x
IS02324	this paper	42B02-p65ADZp in attP40; MKRS/TM6B_VT042734-ZpGdbd in attP2	20151120_41_C4	ditp_is_screen_review	HAV5_X_0083	A01	Fri Dec 11 11:25:34 EST 2015	116165	Fly Light	Sample#2215226417136795685	f		screen	Descending Interneuron	Wyatt Korff	GMR_IS02324-20151120_41_C4	Drosophila melanogaster	20x
IS02327	this paper	VT048906-p65ADZ in attP40_45H03-ZpGDBD in attP2	20191218_44_F4	ditp_is_screen_review	UAS_Chrimson_Venus_X_0070	A01	Thu Jan 30 18:11:12 EST 2020	204952	Fly Light	Sample#2762896563201114210	f		screen	Descending Interneuron	Shigehiro Namiki	JRC_IS02327-20191218_44_F4	Drosophila melanogaster	20x
IS02344	this paper	VT015785-p65ADZp in attP40_HAV5; Sco/CyO; 42F06-ZpGdbd in attP2	20151016_47_G4	nerna_is_screen_review	HAV5_X_0083	A01	Sat Nov 28 20:23:25 EST 2015	113585	Fly Light	Sample#2210650728085586018	f		screen	Rubin	Aljoscha Nern	JRC_IS02344-20151016_47_G4	Drosophila melanogaster	20x
IS02363	this paper	71F06-p65ADZp in attP40_51B11-ZpGdbd in attP2	20201125_43_G5	nerna_is_screen_review	UAS_Chrimson_Venus_X_0070	A01	Mon Dec 14 16:19:39 EST 2020	218006	Fly Light	Sample#2878470220148637794	f		screen	Rubin	Aljoscha Nern	JRC_IS02363-20201125_43_G5	Drosophila melanogaster	20x
IS02370	this paper	55D12-p65ADZp in attP40; MKRS/TM6B_HAV5; Sco/CyO; 72H04-ZpGdbd in attP2	20151120_41_C5	ditp_is_screen_review	HAV5_X_0083	A01	Fri Dec 11 11:25:34 EST 2015	116166	Fly Light	Sample#2215226417614946341	f		screen	Descending Interneuron	Wyatt Korff	GMR_IS02370-20151120_41_C5	Drosophila melanogaster	20x
IS02377	this paper	VT043400-p65ADZp in attP40_VT043662-ZpGDBD in attP2	20151030_42_A4	ditp_is_screen_review	HAV5_X_0083	A01	Mon Nov 16 21:50:49 EST 2015	114807	Fly Light	Sample#2206324070151094370	f		screen	Descending Interneuron	Wyatt Korff	BJD_IS02377-20151030_42_A4	Drosophila melanogaster	20x
IS02378	this paper	w; 61A01-p65ADZp; MKRS/TM6B_HAV5; CyO/Sp; 13B05-ZpGDBD in attP2	20151030_42_E6	ditp_is_screen_review	HAV5_X_0083	A01	Mon Nov 16 21:51:30 EST 2015	114805	Fly Light	Sample#2206324239043133538	f		screen	Descending Interneuron	Wyatt Korff	GMR_IS02378-20151030_42_E6	Drosophila melanogaster	20x
IS02379	this paper	VT025392-p65ADZ in attP40_15E12-ZpGdbd in attP2	20151120_41_C6	ditp_is_screen_review	HAV5_X_0083	A01	Fri Dec 11 11:25:34 EST 2015	116167	Fly Light	Sample#2215226418084708389	f		screen	Descending Interneuron	Wyatt Korff	GMR_IS02379-20151120_41_C6	Drosophila melanogaster	20x
IS02380	this paper	VT039465-p65ADZ in attP40_19G08-ZpGdbd in attP2	20151106_41_B6	ditp_is_screen_review	HAV5_X_0083	A01	Thu Nov 19 10:20:34 EST 2015	115231	Fly Light	Sample#2207237526157000802	f		screen	Descending Interneuron	Wyatt Korff	GMR_IS02380-20151106_41_B6	Drosophila melanogaster	20x
IS02382	this paper	w; 91C05-p65ADZ; MKRS/TM6B_HAV5; CyO/Sp; 37G07-ZpGDBD in attP2	20151106_41_A4	ditp_is_screen_review	HAV5_X_0083	A01	Thu Nov 19 10:20:34 EST 2015	115223	Fly Light	Sample#2207237523640418402	f		screen	Descending Interneuron	Wyatt Korff	GMR_IS02382-20151106_41_A4	Drosophila melanogaster	20x
IS02383	this paper	VT013121-p65ADZp in attP40_45H03-ZpGDBD in attP2	20151106_41_A5	ditp_is_screen_review	HAV5_X_0083	A01	Thu Nov 19 10:20:34 EST 2015	115224	Fly Light	Sample#2207237523954991202	f		screen	Descending Interneuron	Wyatt Korff	GMR_IS02383-20151106_41_A5	Drosophila melanogaster	20x
IS02384	this paper	VT047755-p65ADZp in attP40_47D05-ZpGdbd in attP2	20151120_41_D1	ditp_is_screen_review	HAV5_X_0083	A01	Fri Dec 11 11:25:35 EST 2015	116163	Fly Light	Sample#2215226418541887525	f		screen	Descending Interneuron	Wyatt Korff	GMR_IS02384-20151120_41_D1	Drosophila melanogaster	20x
IS02387	this paper	w; 60B12-p65ADZp; MKRS/TM6B_HAV5; CyO/Sco; 58E05-ZpGDBD in attP2	20151106_41_A6	ditp_is_screen_review	HAV5_X_0083	A01	Thu Nov 19 10:20:34 EST 2015	115225	Fly Light	Sample#2207237524324089954	f		screen	Descending Interneuron	Wyatt Korff	GMR_IS02387-20151106_41_A6	Drosophila melanogaster	20x
IS02388	this paper	14H09-p65ADZp in attP40_61A01-ZpGdbd in attP2	20160304_43_I5	nerna_is_screen_review	HAV5_X_0083	A01	Wed Mar 30 00:30:51 EDT 2016	122323	Fly Light	Sample#2254909215124488266	f		screen	Rubin	Aljoscha Nern	JRC_IS02388-20160304_43_I5	Drosophila melanogaster	20x
IS02391	this paper	81C11-p65ADZp in attP40; MKRS/TM6B_66B05-ZpGdbd in attP2	20151113_41_C5	ditp_is_screen_review	HAV5_X_0083	A01	Mon Nov 23 11:16:46 EST 2015	115817	Fly Light	Sample#2208701221923979362	f		screen	Descending Interneuron	Wyatt Korff	GMR_IS02391-20151113_41_C5	Drosophila melanogaster	20x
IS02393	this paper	VT023490-p65ADZp in attP40_80H02-ZpGdbd in attP2	20151113_41_C6	ditp_is_screen_review	HAV5_X_0083	A01	Mon Nov 23 11:16:47 EST 2015	115818	Fly Light	Sample#2208701222347604066	f		screen	Descending Interneuron	Wyatt Korff	GMR_IS02393-20151113_41_C6	Drosophila melanogaster	20x
IS02394	this paper	61H01-p65ADZp; MKRS/TM6B_82C10-ZpGdbd in attP2	20151120_41_D2	ditp_is_screen_review	HAV5_X_0083	A01	Fri Dec 11 11:25:35 EST 2015	116153	Fly Light	Sample#2215226418986483749	f		screen	Descending Interneuron	Wyatt Korff	GMR_IS02394-20151120_41_D2	Drosophila melanogaster	20x
IS02395	this paper	VT027175-p65ADZp in attP40_83B06-ZpGdbd in attP2	20151106_41_B3	ditp_is_screen_review	HAV5_X_0083	A01	Thu Nov 19 10:20:34 EST 2015	115228	Fly Light	Sample#2207237525272002658	f		screen	Descending Interneuron	Wyatt Korff	GMR_IS02395-20151106_41_B3	Drosophila melanogaster	20x
IS02404	this paper	20A03-p65ADZp in attP40_VT002042-ZpGdbd in attP2	20210507_48_D4	wangk11_is_screen_review	UAS_Chrimson_Venus_X_0070	A01	Thu May 27 14:27:08 EDT 2021	226816	Fly Light	Sample#2937858414941831266	f		screen	Dickson	Kaiyu Wang	JRC_IS02404-20210507_48_D4	Drosophila melanogaster	20x
IS02502	this paper	VT047880-p65ADZp in attP40_35D04-ZpGdbd in attP2	20170714_45_B1	asoy_is_screen_review	UAS_Chrimson_Venus_X_0070	A01	Tue Jan 16 14:27:51 EST 2018	155562	Fly Light	Sample#2493223782508920930	f		screen	Rubin	Yoshi Aso	JRC_IS02502-20170714_45_B1	Drosophila melanogaster	20x
IS02528	this paper	35D04-p65ADZp in attP40_VT047880-ZpGDBD in attP2	20170721_41_C3	asoy_is_screen_review	UAS_Chrimson_Venus_X_0070	A01	Thu Jan 11 20:30:06 EST 2018	155889	Fly Light	Sample#2491503004201517154	f		screen	Rubin	Yoshi Aso	JRC_IS02528-20170721_41_C3	Drosophila melanogaster	20x
IS02532	this paper	VT017416-p65ADZp in attP40_VT042810-ZpGdbd in attP2	20181005_41_B2	minegishir_is_screen_review	UAS_Chrimson_Venus_X_0070	A01	Mon Oct 29 17:28:53 EDT 2018	179319	Fly Light	Sample#2596897172213465186	m		screen	Dickson	Ryo Minegishi	JRC_IS02532-20181005_41_B2	Drosophila melanogaster	20x
IS02534	this paper	VT025392-p65ADZ in attP40_VT017647-ZpGdbd in attP2	20151120_41_D3	ditp_is_screen_review	HAV5_X_0083	A01	Fri Dec 11 11:25:35 EST 2015	116168	Fly Light	Sample#2215226419439468581	f		screen	Descending Interneuron	Wyatt Korff	BJD_IS02534-20151120_41_D3	Drosophila melanogaster	20x
IS02535	this paper	VT039465-p65ADZ in attP40_VT041041-ZpGdbd in attP2	20151113_41_E4	ditp_is_screen_review	HAV5_X_0083	A01	Mon Nov 23 11:16:47 EST 2015	115828	Fly Light	Sample#2208701225518497890	f		screen	Descending Interneuron	Wyatt Korff	BJD_IS02535-20151113_41_E4	Drosophila melanogaster	20x
IS02536	this paper	VT040698-p65ADZp in attP40_VT025718-ZpGDBD in attP2	20151113_41_E2	ditp_is_screen_review	HAV5_X_0083	A01	Mon Nov 23 11:16:47 EST 2015	115826	Fly Light	Sample#2208701224725774434	f		screen	Descending Interneuron	Wyatt Korff	BJD_IS02536-20151113_41_E2	Drosophila melanogaster	20x
IS02538	this paper	VT037825-p65ADZ in attP40_VT020379-ZpGDBD in attP2	20151120_41_D4	ditp_is_screen_review	HAV5_X_0083	A01	Fri Dec 11 11:25:35 EST 2015	116169	Fly Light	Sample#2215226419938590757	f		screen	Descending Interneuron	Wyatt Korff	BJD_IS02538-20151120_41_D4	Drosophila melanogaster	20x
IS02542	this paper	VT049749 p65ADZp in attP40_VT013121-ZpGdbd in attP2	20151113_41_E3	ditp_is_screen_review	HAV5_X_0083	A01	Mon Nov 23 11:16:47 EST 2015	115827	Fly Light	Sample#2208701225124233314	f		screen	Descending Interneuron	Wyatt Korff	BJD_IS02542-20151113_41_E3	Drosophila melanogaster	20x
IS02544	this paper	19G08-p65ADZp in attP40_VT020379-ZpGDBD in attP2	20151120_41_D5	ditp_is_screen_review	HAV5_X_0083	A01	Fri Dec 11 11:25:35 EST 2015	116172	Fly Light	Sample#2215226420391575589	f		screen	Descending Interneuron	Wyatt Korff	GMR_IS02544-20151120_41_D5	Drosophila melanogaster	20x
IS02547	this paper	42B02-p65ADZp in attP40; MKRS/TM6B_VT059427-ZpGdbd in attP2	20151113_41_D5	ditp_is_screen_review	HAV5_X_0083	A01	Mon Nov 23 11:16:47 EST 2015	115823	Fly Light	Sample#2208701223958216802	f		screen	Descending Interneuron	Wyatt Korff	GMR_IS02547-20151113_41_D5	Drosophila melanogaster	20x
IS02548	this paper	42B02-p65ADZp in attP40; MKRS/TM6B_VT005005-ZpGdbd in attP2	20151113_41_D4	ditp_is_screen_review	HAV5_X_0083	A01	Mon Nov 23 11:16:47 EST 2015	115822	Fly Light	Sample#2208701223551369314	f		screen	Descending Interneuron	Wyatt Korff	GMR_IS02548-20151113_41_D4	Drosophila melanogaster	20x
IS02549	this paper	42B02-p65ADZp in attP40; MKRS/TM6B_VT041041-ZpGdbd in attP2	20151113_41_B4	ditp_is_screen_review	HAV5_X_0083	A01	Mon Nov 23 11:16:46 EST 2015	115830	Fly Light	Sample#2208701218987966562	f		screen	Descending Interneuron	Wyatt Korff	GMR_IS02549-20151113_41_B4	Drosophila melanogaster	20x
IS02551	this paper	42B02-p65ADZp in attP40; MKRS/TM6B_VT025789-ZpGdbd in attP2	20151113_41_E1	ditp_is_screen_review	HAV5_X_0083	A01	Mon Nov 23 11:16:47 EST 2015	115825	Fly Light	Sample#2208701224339898466	f		screen	Descending Interneuron	Wyatt Korff	GMR_IS02551-20151113_41_E1	Drosophila melanogaster	20x
IS02552	this paper	55D12-p65ADZp in attP40; MKRS/TM6B_VT063306-ZpGdbd in attP2	20151113_41_E5	ditp_is_screen_review	HAV5_X_0083	A01	Mon Nov 23 11:16:47 EST 2015	115829	Fly Light	Sample#2208701225908568162	f		screen	Descending Interneuron	Wyatt Korff	GMR_IS02552-20151113_41_E5	Drosophila melanogaster	20x
IS02553	this paper	w; 67E08-p65ADZp; MKRS/TM6B_VT025789-ZpGdbd in attP2	20151113_41_D3	ditp_is_screen_review	HAV5_X_0083	A01	Mon Nov 23 11:16:45 EST 2015	115821	Fly Light	Sample#2208701213640228962	f		screen	Descending Interneuron	Wyatt Korff	GMR_IS02553-20151113_41_D3	Drosophila melanogaster	20x
IS02554	this paper	73A05-p65ADZp in attP40_VT059427-ZpGdbd in attP2	20151113_41_D6	ditp_is_screen_review	HAV5_X_0083	A01	Mon Nov 23 11:16:45 EST 2015	115824	Fly Light	Sample#2208701214596530274	f		screen	Descending Interneuron	Wyatt Korff	GMR_IS02554-20151113_41_D6	Drosophila melanogaster	20x
IS02585	this paper	VT000355-p65ADZp in attP40_VT018137-ZpGdbd in attP2	20210806_41_G5	nerna_is_screen_review	UAS_Chrimson_Venus_X_0070	A01	Thu Aug 26 12:17:18 EDT 2021	233838	Fly Light	Sample#2970803033794936930	f		screen	Rubin	Aljoscha Nern	JRC_IS02585-20210806_41_G5	Drosophila melanogaster	20x
IS02608	this paper	VT025739-p65ADZp in attP40_VT025999-ZpGDBD in attP2	20151120_41_D6	ditp_is_screen_review	HAV5_X_0083	A01	Fri Dec 11 11:25:35 EST 2015	116171	Fly Light	Sample#2215226420827783205	f		screen	Descending Interneuron	Wyatt Korff	BJD_IS02608-20151120_41_D6	Drosophila melanogaster	20x
IS02609	this paper	VT025739-p65ADZp in attP40_VT032280-ZpGdbd in attP2	20151120_41_E1	ditp_is_screen_review	HAV5_X_0083	A01	Fri Dec 11 11:25:35 EST 2015	116174	Fly Light	Sample#2215226421301739557	f		screen	Descending Interneuron	Wyatt Korff	BJD_IS02609-20151120_41_E1	Drosophila melanogaster	20x
IS02610	this paper	VT029814-p65ADZp in attP40_VT008145-ZpGDBD in attP2	20151120_41_E2	ditp_is_screen_review	HAV5_X_0083	A01	Fri Dec 11 11:25:35 EST 2015	116170	Fly Light	Sample#2215226421729558565	f		screen	Descending Interneuron	Wyatt Korff	BJD_IS02610-20151120_41_E2	Drosophila melanogaster	20x
IS02612	this paper	VT047755-p65ADZp in attP40_VT003280-ZpGDBD in attP2	20151120_41_E3	ditp_is_screen_review	HAV5_X_0083	A01	Fri Dec 11 11:25:35 EST 2015	116177	Fly Light	Sample#2215226422169960485	f		screen	Descending Interneuron	Wyatt Korff	BJD_IS02612-20151120_41_E3	Drosophila melanogaster	20x
IS02613	this paper	VT062635-p65ADZ in attP40_VT008170-ZpGDBD in attP2	20150904_41_D1	ditp_is_screen_review	HAV5_X_0083	A01	Thu Oct 01 07:25:28 EDT 2015	111095	Fly Light	Sample#2189421354644668514	f		screen	Descending Interneuron	Shigehiro Namiki	JRC_IS02613-20150904_41_D1	Drosophila melanogaster	20x
IS02617	this paper	VT037574-p65ADZ in attP40_VT025598-ZpGdbd in attP2	20151120_41_E4	ditp_is_screen_review	HAV5_X_0083	A01	Fri Dec 11 11:25:36 EST 2015	116173	Fly Light	Sample#2215226422627139621	f		screen	Descending Interneuron	Wyatt Korff	BJD_IS02617-20151120_41_E4	Drosophila melanogaster	20x
IS02618	this paper	w; 11H10-p65ADZp; MKRS/TM6B_VT040348-ZpGdbd in attP2	20151120_41_E5	ditp_is_screen_review	HAV5_X_0083	A01	Fri Dec 11 11:25:36 EST 2015	116178	Fly Light	Sample#2215226423084318757	f		screen	Descending Interneuron	Wyatt Korff	GMR_IS02618-20151120_41_E5	Drosophila melanogaster	20x
IS02630	this paper	19G08-p65ADZp in attP40_VT023750-ZpGdbd in attP2	20151120_41_E6	ditp_is_screen_review	HAV5_X_0083	A01	Fri Dec 11 11:25:36 EST 2015	116180	Fly Light	Sample#2215226423533109285	f		screen	Descending Interneuron	Wyatt Korff	GMR_IS02630-20151120_41_E6	Drosophila melanogaster	20x
IS02633	this paper	42B02-p65ADZp in attP40; MKRS/TM6B_VT044958-ZpGDBD in attP2	20151120_41_F2	ditp_is_screen_review	HAV5_X_0083	A01	Fri Dec 11 11:25:36 EST 2015	116176	Fly Light	Sample#2215226424468439077	f		screen	Descending Interneuron	Wyatt Korff	GMR_IS02633-20151120_41_F2	Drosophila melanogaster	20x
IS02635	this paper	42B02-p65ADZp in attP40; MKRS/TM6B_VT037574-ZpGdbd in attP2	20151120_41_F3	ditp_is_screen_review	HAV5_X_0083	A01	Fri Dec 11 11:25:36 EST 2015	116175	Fly Light	Sample#2215226424908840997	f		screen	Descending Interneuron	Wyatt Korff	GMR_IS02635-20151120_41_F3	Drosophila melanogaster	20x
IS02736	this paper	VT009857-p65ADZp in attP40_64G09-ZpGdbd in attP2	20161118_51_G4	goldammerj_is_screen_review	UAS_Chrimson_Venus_X_0070	A00	Tue Dec 06 06:17:56 EST 2016	139938	Fly Light	Sample#2345971018239049826	f		screen	Terra Incognita	Jens Goldammer	JRC_IS02736-20161118_51_G4	Drosophila melanogaster	20x
IS02757	this paper	43D05-p65ADZp in attP40_71G01-ZpGdbd in attP2	20170707_52_G3	rubing_itom10_is_screen_review	UAS_Chrimson_Venus_X_0070	A	Sun Jul 23 05:56:53 EDT 2017	155975	Fly Light	Sample#2428937440984039569	f		screen	Terra Incognita	Masayoshi Ito	JRC_IS02757-20170707_52_G3	Drosophila melanogaster	20x
IS02762	this paper	71G01-p65ADZp in attP40; MKRS/TM6B_43D05-ZpGdbd in attP2	20170707_52_D4	rubing_itom10_is_screen_review	UAS_Chrimson_Venus_X_0070	A	Sun Jul 23 05:56:53 EDT 2017	155980	Fly Light	Sample#2428937442334609553	f		screen	Terra Incognita	Masayoshi Ito	JRC_IS02762-20170707_52_D4	Drosophila melanogaster	20x
IS02814	this paper	VT006486-p65ADZp in attP40_VT000605-ZpGdbd in attP2	20180824_43_D2	rubing_wolfft_is_screen_review	UAS_Chrimson_Venus_X_0070	A01	Mon Sep 24 13:44:36 EDT 2018	177076	Fly Light	Sample#2584157151622594658	f		screen	Rubin	Tanya Wolff	JRC_IS02814-20180824_43_D2	Drosophila melanogaster	20x
IS02824	this paper	VT000605-p65ADZp in attP40_VT007358-ZpGDBD in attP2	20210625_45_A5	rubing_wolfft_is_screen_review	UAS_Chrimson_Venus_X_0070	A01	Mon Jul 12 15:10:42 EDT 2021	230796	Fly Light	Sample#2954539219608928354	f		screen	Rubin	Tanya Wolff	JRC_IS02824-20210625_45_A5	Drosophila melanogaster	20x
IS02854	this paper	VT045793-p65ADZp in attP40_65H10-ZpGdbd in attP2	20190802_42_G2	rubing_wolfft_is_screen_review	UAS_Chrimson_Venus_X_0070	A01	Fri Aug 23 14:03:36 EDT 2019	197049	Fly Light	Sample#2704837093661605986	f		screen	Rubin	Tanya Wolff	JRC_IS02854-20190802_42_G2	Drosophila melanogaster	20x
IS02965	this paper	w; 93G12-p65ADZ; MKRS/TM6B_70F05-ZpGdbd in attP2	20201218_45_H3	schretterc_is_screen_review	UAS_Chrimson_Venus_X_0070	A01	Fri Jan 15 10:17:44 EST 2021	219077	Fly Light	Sample#2889975553031405601	f		screen			JRC_IS02965-20201218_45_H3	Drosophila melanogaster	20x
IS02992	this paper	VT040569-p65ADZp in attP40_VT043700-ZpGDBD in attP2	20200228_45_J1	wangk11_is_screen_review	UAS_Chrimson_Venus_X_0070	A01	Thu Mar 12 14:33:41 EDT 2020	209190	Fly Light	Sample#2778047012463968354	f		screen	Dickson	Kaiyu Wang	JRC_IS02992-20200228_45_J1	Drosophila melanogaster	20x
IS03008	this paper	VT023560-p65ADZp in attP40_VT023749-ZpGDBD in attP2	20150911_45_A2	dicksonb_is_screen_review	HAV5_X_0083	A01	Thu Oct 01 16:33:33 EDT 2015	111383	Fly Light	Sample#2189559284369457250	m		screen	Dickson	Barry Dickson	JRC_IS03008-20150911_45_A2	Drosophila melanogaster	20x
IS03014	this paper	VT040346-p65ADZ in attP40_13F04-ZpGdbd in attP2	20150911_45_A5	dicksonb_is_screen_review	HAV5_X_0083	A01	Thu Oct 01 16:33:34 EDT 2015	111386	Fly Light	Sample#2189559287540351074	m		screen	Dickson	Barry Dickson	JRC_IS03014-20150911_45_A5	Drosophila melanogaster	20x
IS03037	this paper	VT040556-p65ADZp in attP40_79H08-ZpGdbd in attP2	20150911_45_A6	dicksonb_is_screen_review	HAV5_X_0083	A01	Thu Oct 01 16:33:34 EDT 2015	111387	Fly Light	Sample#2189559287825563746	m		screen	Dickson	Barry Dickson	JRC_IS03037-20150911_45_A6	Drosophila melanogaster	20x
IS03040	this paper	VT038210-p65ADZp in attP40_VT026667-ZpGdbd in attP2	20150911_45_B1	dicksonb_is_screen_review	HAV5_X_0083	A01	Thu Oct 01 16:33:34 EDT 2015	111388	Fly Light	Sample#2189559288140136546	m		screen	Dickson	Barry Dickson	JRC_IS03040-20150911_45_B1	Drosophila melanogaster	20x
IS03054	this paper	VT058697-p65ADZp in attP40_38B09-ZpGdbd in attP2	20151016_43_B2	dicksonb_is_screen_review	HAV5_X_0083	A01	Fri Oct 30 08:29:20 EDT 2015	114167	Fly Light	Sample#2199946676674756682	m		screen	Dickson	Barry Dickson	JRC_IS03054-20151016_43_B2	Drosophila melanogaster	20x
IS03055	this paper	VT058697-p65ADZp in attP40_79A01-ZpGdbd in attP2	20151016_43_B1	dicksonb_is_screen_review	HAV5_X_0083	A01	Fri Oct 30 08:29:20 EDT 2015	114159	Fly Light	Sample#2199946675315802186	m		screen	Dickson	Barry Dickson	JRC_IS03055-20151016_43_B1	Drosophila melanogaster	20x
IS03076	this paper	VT040353-p65ADZp in attP40_VT001595-ZpGDBD in attP2	20151016_43_B5	dicksonb_is_screen_review	HAV5_X_0083	A01	Fri Oct 30 08:29:19 EDT 2015	114168	Fly Light	Sample#2199946670119059530	m		screen	Dickson	Barry Dickson	JRC_IS03076-20151016_43_B5	Drosophila melanogaster	20x
IS03081	this paper	VT058688-p65ADZp in attP40_VT019023-ZpGdbd in attP2	20151016_43_B4	dicksonb_is_screen_review	HAV5_X_0083	A01	Fri Oct 30 08:29:21 EDT 2015	114166	Fly Light	Sample#2199946679740792906	m		screen	Dickson	Barry Dickson	JRC_IS03081-20151016_43_B4	Drosophila melanogaster	20x
IS03082	this paper	VT058688-p65ADZp in attP40_VT008671-ZpGdbd in attP2	20181109_44_F1	wangk11_is_screen_review	UAS_Chrimson_Venus_X_0070	A01	Thu Nov 29 15:11:00 EST 2018	181422	Fly Light	Sample#2608111593111683170	m		screen	Dickson	Kaiyu Wang	JRC_IS03082-20181109_44_F1	Drosophila melanogaster	20x
IS03090	this paper	15A01-p65ADZp in attP40_VT012287-ZpGdbd in attP2	20160205_51_F6	rubing_itom10_is_screen_review	UAS_Chrimson_Venus_X_0070	A01	Wed Mar 02 00:12:45 EST 2016	121524	Fly Light	Sample#2244772901830000714	f		screen	Terra Incognita	Masayoshi Ito	JRC_IS03090-20160205_51_F6	Drosophila melanogaster	20x
IS03138	this paper	w; 76E09-p65ADZ; MKRS/TM6B_HAV5; CyO/Sco; 28A12-ZpGDBD in attP2	20170310_41_B1	nerna_is_screen_review	UAS_Chrimson_Venus_X_0070	A01	Mon Apr 10 08:54:36 EDT 2017	146688	Fly Light	Sample#2391293829085921378	f		screen	Rubin	Aljoscha Nern	JRC_IS03138-20170310_41_B1	Drosophila melanogaster	20x
IS03191	this paper	72H06-p65ADZp in attP40_38E10-ZpGDBD in attP2	20160226_51_F3	rubing_itom10_is_screen_review	UAS_Chrimson_Venus_X_0070	A00	Fri Mar 11 15:10:03 EST 2016	122885	Fly Light	Sample#2248260205395574858	f		screen	Terra Incognita	Masayoshi Ito	JRC_IS03191-20160226_51_F3	Drosophila melanogaster	20x
IS03196	this paper	VT040548-p65ADZp in attP40_VT006460-ZpGDBD in attP2	20150911_45_B2	dicksonb_is_screen_review	HAV5_X_0083	A01	Thu Oct 01 16:33:34 EDT 2015	111389	Fly Light	Sample#2189559288442126434	m		screen	Dickson	Barry Dickson	JRC_IS03196-20150911_45_B2	Drosophila melanogaster	20x
IS03284	this paper	VT019579-p65ADZp in attP40_VT000606-ZpGDBD in attP2	20151016_43_D1	dicksonb_is_screen_review	HAV5_X_0083	A01	Fri Oct 30 08:29:24 EDT 2015	114149	Fly Light	Sample#2199946693162565706	m		screen	Dickson	Barry Dickson	JRC_IS03284-20151016_43_D1	Drosophila melanogaster	20x
IS03292	this paper	VT048879-p65ADZp in attP40_VT007072-ZpGDBD in attP2	20151016_43_C4	dicksonb_is_screen_review	HAV5_X_0083	A01	Fri Oct 30 08:29:23 EDT 2015	114146	Fly Light	Sample#2199946688460750922	m		screen	Dickson	Barry Dickson	JRC_IS03292-20151016_43_C4	Drosophila melanogaster	20x
IS03333	this paper	VT059892-p65ADZp in attP40_58F07-ZpGdbd in attP2	20151016_43_E1	dicksonb_is_screen_review	HAV5_X_0083	A01	Fri Oct 30 08:29:26 EDT 2015	114161	Fly Light	Sample#2199946700276105290	m		screen	Dickson	Barry Dickson	JRC_IS03333-20151016_43_E1	Drosophila melanogaster	20x
IS03346	this paper	VT049347-p65ADZp in attP40_VT000606-ZpGDBD in attP2	20151016_43_C2	dicksonb_is_screen_review	HAV5_X_0083	A01	Fri Oct 30 08:29:22 EDT 2015	114174	Fly Light	Sample#2199946685138862154	m		screen	Dickson	Barry Dickson	JRC_IS03346-20151016_43_C2	Drosophila melanogaster	20x
IS03347	this paper	VT049347-p65ADZp in attP40_VT008168-ZpGdbd in attP2	20150911_45_B5	dicksonb_is_screen_review	HAV5_X_0083	A01	Thu Oct 01 16:33:34 EDT 2015	111392	Fly Light	Sample#2189559288756699234	m		screen	Dickson	Barry Dickson	JRC_IS03347-20150911_45_B5	Drosophila melanogaster	20x
IS03348	this paper	VT049977-p65ADZp in attP40_VT000606-ZpGDBD in attP2	20151016_43_C3	dicksonb_is_screen_review	HAV5_X_0083	A01	Fri Oct 30 08:29:23 EDT 2015	114145	Fly Light	Sample#2199946686653005898	m		screen	Dickson	Barry Dickson	JRC_IS03348-20151016_43_C3	Drosophila melanogaster	20x
IS03352	this paper	VT007182-p65ADZp in attP40_VT019048-ZpGDBD in attP2	20150911_45_B6	dicksonb_is_screen_review	HAV5_X_0083	A01	Thu Oct 01 16:33:34 EDT 2015	111393	Fly Light	Sample#2189559289096437858	m		screen	Dickson	Barry Dickson	JRC_IS03352-20150911_45_B6	Drosophila melanogaster	20x
IS03354	this paper	VT007182-p65ADZp in attP40_80E07-ZpGdbd in attP2	20151016_43_D5	dicksonb_is_screen_review	HAV5_X_0083	A01	Fri Oct 30 08:29:25 EDT 2015	114153	Fly Light	Sample#2199946697751134282	m		screen	Dickson	Barry Dickson	JRC_IS03354-20151016_43_D5	Drosophila melanogaster	20x
IS03360	this paper	VT019074-p65ADZp in attP40_18C12-ZpGdbd in attP2	20151016_43_D4	dicksonb_is_screen_review	HAV5_X_0083	A01	Fri Oct 30 08:29:25 EDT 2015	114152	Fly Light	Sample#2199946695486210122	m		screen	Dickson	Barry Dickson	JRC_IS03360-20151016_43_D4	Drosophila melanogaster	20x
IS03371	this paper	VT050239-p65ADZp in attP40_42F06-ZpGdbd in attP2	20151016_43_E5	dicksonb_is_screen_review	HAV5_X_0083	A01	Fri Oct 30 08:29:27 EDT 2015	114155	Fly Light	Sample#2199946704050978890	m		screen	Dickson	Barry Dickson	JRC_IS03371-20151016_43_E5	Drosophila melanogaster	20x
IS03402	this paper	VT025966-p65ADZp in attP40_VT002015-ZpGDBD in attP2	20151016_43_E4	dicksonb_is_screen_review	HAV5_X_0083	A01	Fri Oct 30 08:29:26 EDT 2015	114165	Fly Light	Sample#2199946702033518666	m		screen	Dickson	Barry Dickson	JRC_IS03402-20151016_43_E4	Drosophila melanogaster	20x
IS03405	this paper	VT025966-p65ADZp in attP40_VT026340-ZpGDBD in attP2	20151016_43_A3	dicksonb_is_screen_review	HAV5_X_0083	A01	Fri Oct 30 08:29:19 EDT 2015	114164	Fly Light	Sample#2199946671310241866	m		screen	Dickson	Barry Dickson	JRC_IS03405-20151016_43_A3	Drosophila melanogaster	20x
IS03426	this paper	VT026172-p65ADZp in attP40_VT016966-ZpGDBD in attP2	20170310_44_B4	wangk11_is_screen_review	HAV5_X_0083	A01	Fri Mar 31 16:05:08 EDT 2017	146703	Fly Light	Sample#2387778296851988578	m		screen	Dickson	Kaiyu Wang	JRC_IS03426-20170310_44_B4	Drosophila melanogaster	20x
IS03427	this paper	VT038119-p65ADZp in attP40_VT019749-ZpGdbd in attP2	20160812_41_D1	nerna_is_screen_review	UAS_Chrimson_Venus_X_0070	A01	Fri Sep 09 16:12:00 EDT 2016	132595	Fly Light	Sample#2314215285919318161	f		screen	Rubin	Aljoscha Nern	JRC_IS03427-20160812_41_D1	Drosophila melanogaster	20x
IS03460	this paper	92E10-p65ADZp in attP40_58F07-ZpGdbd in attP2	20151016_43_B6	dicksonb_is_screen_review	HAV5_X_0083	A01	Fri Oct 30 08:29:21 EDT 2015	114157	Fly Light	Sample#2199946681615646794	m		screen	Dickson	Barry Dickson	JRC_IS03460-20151016_43_B6	Drosophila melanogaster	20x
IS03462	this paper	92E10-p65ADZp in attP40_87B09-ZpGdbd in attP2	20151016_43_B3	dicksonb_is_screen_review	HAV5_X_0083	A01	Fri Oct 30 08:29:21 EDT 2015	114156	Fly Light	Sample#2199946678130180170	m		screen	Dickson	Barry Dickson	JRC_IS03462-20151016_43_B3	Drosophila melanogaster	20x
IS03476	this paper	VT016456-p65ADZp in attP40_11B07-ZpGdbd in attP2	20151016_43_A1	dicksonb_is_screen_review	HAV5_X_0083	A01	Fri Oct 30 08:29:19 EDT 2015	114171	Fly Light	Sample#2199946670844674122	m		screen	Dickson	Barry Dickson	JRC_IS03476-20151016_43_A1	Drosophila melanogaster	20x
IS03484	this paper	VT049373-p65ADZp in attP40_VT002021-ZpGdbd in attP2	20151016_43_C1	dicksonb_is_screen_review	HAV5_X_0083	A01	Fri Oct 30 08:29:22 EDT 2015	114158	Fly Light	Sample#2199946683486306378	m		screen	Dickson	Barry Dickson	JRC_IS03484-20151016_43_C1	Drosophila melanogaster	20x
IS03514	this paper	VT023560-p65ADZp in attP40_VT009847-ZpGDBD in attP2	20151016_43_A4	dicksonb_is_screen_review	HAV5_X_0083	A01	Fri Oct 30 08:29:19 EDT 2015	114162	Fly Light	Sample#2199946671939387466	m		screen	Dickson	Barry Dickson	JRC_IS03514-20151016_43_A4	Drosophila melanogaster	20x
IS03556	this paper	VT056375-p65ADZp in attP40_VT024098-ZpGDBD in attP2	20150911_45_C4	dicksonb_is_screen_review	HAV5_X_0083	A01	Thu Oct 01 16:33:34 EDT 2015	111398	Fly Light	Sample#2189559289406816354	m		screen	Dickson	Barry Dickson	JRC_IS03556-20150911_45_C4	Drosophila melanogaster	20x
IS03577	this paper	VT048827-p65ADZp in attP40_VT013947-ZpGDBD in attP2	20151016_43_A5	dicksonb_is_screen_review	HAV5_X_0083	A01	Fri Oct 30 08:29:19 EDT 2015	114170	Fly Light	Sample#2199946673306730570	m		screen	Dickson	Barry Dickson	JRC_IS03577-20151016_43_A5	Drosophila melanogaster	20x
IS03611	this paper	11D01-p65ADZp in attP40_55C09-ZpGdbd in attP2	20151016_43_A6	dicksonb_is_screen_review	HAV5_X_0083	A01	Fri Oct 30 08:29:20 EDT 2015	114169	Fly Light	Sample#2199946674187534410	m		screen	Dickson	Barry Dickson	JRC_IS03611-20151016_43_A6	Drosophila melanogaster	20x
IS03645	this paper	VT013741-p65ADZp in attP40_VT020122-ZpGDBD in attP2	20190913_42_C3	minegishir_is_screen_review	UAS_Chrimson_Venus_X_0070	A01	Fri Oct 04 15:27:52 EDT 2019	199414	Fly Light	Sample#2720078588530393186	f		screen	Dickson	Ryo Minegishi	JRC_IS03645-20190913_42_C3	Drosophila melanogaster	20x
IS03693	this paper	31D07-p65ADZp in attP40_41C05-ZpGdbd in attP2	20210723_43_F3	nerna_is_screen_review	UAS_Chrimson_Venus_X_0070	A01	Thu Aug 05 13:28:45 EDT 2021	232953	Fly Light	Sample#2963210871997726818	f		screen	Rubin	Aljoscha Nern	JRC_IS03693-20210723_43_F3	Drosophila melanogaster	20x
IS03830	this paper	22D03-p65ADZp in attP40_58F07-ZpGdbd in attP2	20210319_42_G2	schretterc_is_screen_review	UAS_Chrimson_Venus_X_0070	A01	Tue Apr 06 13:15:05 EDT 2021	223927	Fly Light	Sample#2919358501916508258	f		screen	Rubin	Katie Schretter	JRC_IS03830-20210319_42_G2	Drosophila melanogaster	20x
IS03882	this paper	50H07-p65ADZp in attP40; MKRS/TM6B_54B05-ZpGdbd in attP2	20150904_45_C6	rubing_wolfft_is_screen_review	HAV5_X_0083	A01	Thu Oct 01 07:26:11 EDT 2015	111123	Fly Light	Sample#2189421537239498850	f		screen	Rubin	Tanya Wolff	JRC_IS03882-20150904_45_C6	Drosophila melanogaster	20x
IS03883	this paper	50H07-p65ADZp in attP40; MKRS/TM6B_69A01-ZpGdbd in attP2	20150904_45_D1	rubing_wolfft_is_screen_review	HAV5_X_0083	A01	Thu Oct 01 07:26:12 EDT 2015	111124	Fly Light	Sample#2189421537709260898	f		screen	Rubin	Tanya Wolff	JRC_IS03883-20150904_45_D1	Drosophila melanogaster	20x
IS03884	this paper	50H07-p65ADZp in attP40; MKRS/TM6B_70B04-ZpGdbd in attP2	20150904_45_D2	rubing_wolfft_is_screen_review	HAV5_X_0083	A01	Thu Oct 01 07:26:12 EDT 2015	111125	Fly Light	Sample#2189421538204188770	f		screen	Rubin	Tanya Wolff	JRC_IS03884-20150904_45_D2	Drosophila melanogaster	20x
IS03885	this paper	50H07-p65ADZp in attP40; MKRS/TM6B_72B07-ZpGdbd in attP2	20150904_46_G5	rubing_wolfft_is_screen_review	HAV5_X_0083	A01	Thu Oct 01 07:26:26 EDT 2015	111126	Fly Light	Sample#2189421596232384610	f		screen	Rubin	Tanya Wolff	JRC_IS03885-20150904_46_G5	Drosophila melanogaster	20x
IS03886	this paper	50H07-p65ADZp in attP40; MKRS/TM6B_72D01-ZpGdbd in attP2	20150904_45_B6	rubing_wolfft_is_screen_review	HAV5_X_0083	A01	Thu Oct 01 07:26:11 EDT 2015	111127	Fly Light	Sample#2189421535003934818	f		screen	Rubin	Tanya Wolff	JRC_IS03886-20150904_45_B6	Drosophila melanogaster	20x
IS03887	this paper	50H07-p65ADZp in attP40; MKRS/TM6B_73H08-ZpGdbd in attP2	20150904_46_D6	rubing_wolfft_is_screen_review	HAV5_X_0083	A01	Thu Oct 01 07:26:12 EDT 2015	111128	Fly Light	Sample#2189421540443947106	f		screen	Rubin	Tanya Wolff	JRC_IS03887-20150904_46_D6	Drosophila melanogaster	20x
IS03889	this paper	50H07-p65ADZp in attP40; MKRS/TM6B_80D07-ZpGdbd in attP2	20150904_46_E1	rubing_wolfft_is_screen_review	HAV5_X_0083	A01	Thu Oct 01 07:26:13 EDT 2015	111129	Fly Light	Sample#2189421545594552418	f		screen	Rubin	Tanya Wolff	JRC_IS03889-20150904_46_E1	Drosophila melanogaster	20x
IS03890	this paper	50H07-p65ADZp in attP40; MKRS/TM6B_81A04-ZpGdbd in attP2/ TM3	20150904_46_E3	rubing_wolfft_is_screen_review	HAV5_X_0083	A01	Thu Oct 01 07:26:14 EDT 2015	111131	Fly Light	Sample#2189421546127229026	f		screen	Rubin	Tanya Wolff	JRC_IS03890-20150904_46_E3	Drosophila melanogaster	20x
IS03891	this paper	50H07-p65ADZp in attP40; MKRS/TM6B_81D02-ZpGdbd in attP2	20150904_46_E4	rubing_wolfft_is_screen_review	HAV5_X_0083	A01	Thu Oct 01 07:26:17 EDT 2015	111132	Fly Light	Sample#2189421559377035362	f		screen	Rubin	Tanya Wolff	JRC_IS03891-20150904_46_E4	Drosophila melanogaster	20x
IS03892	this paper	50H07-p65ADZp in attP40; MKRS/TM6B_83A10-ZpGdbd in attP2	20150904_46_E5	rubing_wolfft_is_screen_review	HAV5_X_0083	A01	Thu Oct 01 07:26:17 EDT 2015	111133	Fly Light	Sample#2189421559624499298	f		screen	Rubin	Tanya Wolff	JRC_IS03892-20150904_46_E5	Drosophila melanogaster	20x
IS03893	this paper	50H07-p65ADZp in attP40; MKRS/TM6B_83B06-ZpGdbd in attP2	20150904_46_E6	rubing_wolfft_is_screen_review	HAV5_X_0083	A01	Thu Oct 01 07:26:17 EDT 2015	111134	Fly Light	Sample#2189421560127815778	f		screen	Rubin	Tanya Wolff	JRC_IS03893-20150904_46_E6	Drosophila melanogaster	20x
IS03895	this paper	50H07-p65ADZp in attP40; MKRS/TM6B_89A06-ZpGdbd in attP2	20150904_46_F2	rubing_wolfft_is_screen_review	HAV5_X_0083	A01	Thu Oct 01 07:26:17 EDT 2015	111136	Fly Light	Sample#2189421560966676578	f		screen	Rubin	Tanya Wolff	JRC_IS03895-20150904_46_F2	Drosophila melanogaster	20x
IS03896	this paper	50H07-p65ADZp in attP40; MKRS/TM6B_95C12-ZpGdbd in attP2	20150904_46_F3	rubing_wolfft_is_screen_review	HAV5_X_0083	A01	Thu Oct 01 07:26:17 EDT 2015	111137	Fly Light	Sample#2189421562212384866	f		screen	Rubin	Tanya Wolff	JRC_IS03896-20150904_46_F3	Drosophila melanogaster	20x
IS03923	this paper	w; 31A10-p65ADZp; MKRS/ TM6B_10B11-ZpGdbd in attP2	20150904_46_F4	rubing_wolfft_is_screen_review	HAV5_X_0083	A01	Thu Oct 01 07:26:18 EDT 2015	111138	Fly Light	Sample#2189421562921222242	f		screen	Rubin	Tanya Wolff	JRC_IS03923-20150904_46_F4	Drosophila melanogaster	20x
IS03924	this paper	w; 31A10-p65ADZp; MKRS/ TM6B_13F12-ZpGdbd in attP2	20150904_46_F5	rubing_wolfft_is_screen_review	HAV5_X_0083	A01	Thu Oct 01 07:26:19 EDT 2015	111139	Fly Light	Sample#2189421569120403554	f		screen	Rubin	Tanya Wolff	JRC_IS03924-20150904_46_F5	Drosophila melanogaster	20x
IS03925	this paper	w; 31A10-p65ADZp; MKRS/ TM6B_17B02-ZpGdbd in attP2	20150904_46_F6	rubing_wolfft_is_screen_review	HAV5_X_0083	A01	Thu Oct 01 07:26:20 EDT 2015	111140	Fly Light	Sample#2189421573813829730	f		screen	Rubin	Tanya Wolff	JRC_IS03925-20150904_46_F6	Drosophila melanogaster	20x
IS03926	this paper	w; 31A10-p65ADZp; MKRS/ TM6B_22G07-ZpGdbd in attP2	20150904_45_A6	rubing_wolfft_is_screen_review	HAV5_X_0083	A01	Thu Oct 01 07:26:10 EDT 2015	111262	Fly Light	Sample#2189421532676096098	f		screen	Rubin	Tanya Wolff	JRC_IS03926-20150904_45_A6	Drosophila melanogaster	20x
IS03927	this paper	w; 31A10-p65ADZp; MKRS/ TM6B_28D01-ZpGdbd in attP2	20150904_47_D5	rubing_wolfft_is_screen_review	HAV5_X_0083	A01	Thu Oct 01 07:26:37 EDT 2015	110930	Fly Light	Sample#2189421645817446498	f		screen	Rubin	Tanya Wolff	JRC_IS03927-20150904_47_D5	Drosophila melanogaster	20x
IS03928	this paper	w; 31A10-p65ADZp; MKRS/ TM6B_32B03-ZpGdbd in attP2	20150904_45_G1	rubing_wolfft_is_screen_review	HAV5_X_0083	A01	Thu Oct 01 07:26:28 EDT 2015	111157	Fly Light	Sample#2189421608345534562	f		screen	Rubin	Tanya Wolff	JRC_IS03928-20150904_45_G1	Drosophila melanogaster	20x
IS03929	this paper	w; 31A10-p65ADZp; MKRS/ TM6B_32B07-ZpGdbd in attP2	20150904_46_G1	rubing_wolfft_is_screen_review	HAV5_X_0083	A01	Thu Oct 01 07:26:21 EDT 2015	111141	Fly Light	Sample#2189421578188488802	f		screen	Rubin	Tanya Wolff	JRC_IS03929-20150904_46_G1	Drosophila melanogaster	20x
IS03930	this paper	w; 31A10-p65ADZp; MKRS/ TM6B_40B09-ZpGdbd in attP2	20150904_46_G2	rubing_wolfft_is_screen_review	HAV5_X_0083	A01	Thu Oct 01 07:26:22 EDT 2015	111142	Fly Light	Sample#2189421582852554850	f		screen	Rubin	Tanya Wolff	JRC_IS03930-20150904_46_G2	Drosophila melanogaster	20x
IS03931	this paper	w; 31A10-p65ADZp; MKRS/ TM6B_48H04-ZpGdbd in attP2	20150904_46_G3	rubing_wolfft_is_screen_review	HAV5_X_0083	A01	Thu Oct 01 07:26:24 EDT 2015	111143	Fly Light	Sample#2189421589236285538	f		screen	Rubin	Tanya Wolff	JRC_IS03931-20150904_46_G3	Drosophila melanogaster	20x
IS03933	this paper	w; 31A10-p65ADZp; MKRS/ TM6B_50B11-ZpGdbd in attP2	20150904_46_G4	rubing_wolfft_is_screen_review	HAV5_X_0083	A01	Thu Oct 01 07:26:24 EDT 2015	111144	Fly Light	Sample#2189421591266328674	f		screen	Rubin	Tanya Wolff	JRC_IS03933-20150904_46_G4	Drosophila melanogaster	20x
IS03934	this paper	w; 31A10-p65ADZp; MKRS/ TM6B_53C01-ZpGdbd in attP2	20151120_42_A5	rubing_wolfft_is_screen_review	HAV5_X_0083	A01	Fri Dec 11 11:33:59 EST 2015	116585	Fly Light	Sample#2215228532634681381	f		screen	Rubin	Tanya Wolff	JRC_IS03934-20151120_42_A5	Drosophila melanogaster	20x
IS03936	this paper	w; 31A10-p65ADZp; MKRS/ TM6B_53G11-ZpGdbd in attP2	20150904_45_G6	rubing_wolfft_is_screen_review	HAV5_X_0083	A01	Thu Oct 01 07:26:36 EDT 2015	111162	Fly Light	Sample#2189421640360656994	f		screen	Rubin	Tanya Wolff	JRC_IS03936-20150904_45_G6	Drosophila melanogaster	20x
IS03937	this paper	w; 31A10-p65ADZp; MKRS/ TM6B_53H02-ZpGdbd in attP2	20150904_45_G2	rubing_wolfft_is_screen_review	HAV5_X_0083	A01	Thu Oct 01 07:26:31 EDT 2015	111158	Fly Light	Sample#2189421620668399714	f		screen	Rubin	Tanya Wolff	JRC_IS03937-20150904_45_G2	Drosophila melanogaster	20x
IS03938	this paper	w; 31A10-p65ADZp; MKRS/ TM6B_54B05-ZpGdbd in attP2	20150904_45_E2	rubing_wolfft_is_screen_review	HAV5_X_0083	A01	Thu Oct 01 07:26:14 EDT 2015	111146	Fly Light	Sample#2189421545862987874	f		screen	Rubin	Tanya Wolff	JRC_IS03938-20150904_45_E2	Drosophila melanogaster	20x
IS03939	this paper	w; 31A10-p65ADZp; MKRS/ TM6B_65C10-ZpGdbd in attP2	20150904_45_E3	rubing_wolfft_is_screen_review	HAV5_X_0083	A01	Thu Oct 01 07:26:17 EDT 2015	111147	Fly Light	Sample#2189421559116988514	f		screen	Rubin	Tanya Wolff	JRC_IS03939-20150904_45_E3	Drosophila melanogaster	20x
IS03940	this paper	w; 31A10-p65ADZp; MKRS/ TM6B_72B07-ZpGdbd in attP2	20150904_45_E4	rubing_wolfft_is_screen_review	HAV5_X_0083	A01	Thu Oct 01 07:26:17 EDT 2015	111148	Fly Light	Sample#2189421559876157538	f		screen	Rubin	Tanya Wolff	JRC_IS03940-20150904_45_E4	Drosophila melanogaster	20x
IS03941	this paper	w; 31A10-p65ADZp; MKRS/ TM6B_76C05-ZpGdbd in attP2	20150904_45_E5	rubing_wolfft_is_screen_review	HAV5_X_0083	A01	Thu Oct 01 07:26:17 EDT 2015	111149	Fly Light	Sample#2189421560710824034	f		screen	Rubin	Tanya Wolff	JRC_IS03941-20150904_45_E5	Drosophila melanogaster	20x
IS03942	this paper	w; 31A10-p65ADZp; MKRS/ TM6B_80D07-ZpGdbd in attP2	20150904_45_E6	rubing_wolfft_is_screen_review	HAV5_X_0083	A01	Thu Oct 01 07:26:17 EDT 2015	111150	Fly Light	Sample#2189421561620988002	f		screen	Rubin	Tanya Wolff	JRC_IS03942-20150904_45_E6	Drosophila melanogaster	20x
IS03943	this paper	w; 31A10-p65ADZp; MKRS/ TM6B_81A04-ZpGdbd in attP2/ TM3	20150904_45_H1	rubing_wolfft_is_screen_review	HAV5_X_0083	A01	Thu Oct 01 07:26:36 EDT 2015	111163	Fly Light	Sample#2189421641350512738	f		screen	Rubin	Tanya Wolff	JRC_IS03943-20150904_45_H1	Drosophila melanogaster	20x
IS03944	this paper	w; 31A10-p65ADZp; MKRS/ TM6B_81D02-ZpGdbd in attP2	20150904_45_F1	rubing_wolfft_is_screen_review	HAV5_X_0083	A01	Thu Oct 01 07:26:18 EDT 2015	111151	Fly Light	Sample#2189421564401811554	f		screen	Rubin	Tanya Wolff	JRC_IS03944-20150904_45_F1	Drosophila melanogaster	20x
IS03945	this paper	w; 31A10-p65ADZp; MKRS/ TM6B_83A10-ZpGdbd in attP2	20150904_45_F2	rubing_wolfft_is_screen_review	HAV5_X_0083	A01	Thu Oct 01 07:26:20 EDT 2015	111152	Fly Light	Sample#2189421571016228962	f		screen	Rubin	Tanya Wolff	JRC_IS03945-20150904_45_F2	Drosophila melanogaster	20x
IS03946	this paper	w; 31A10-p65ADZp; MKRS/ TM6B_83B06-ZpGdbd in attP2	20150904_45_F3	rubing_wolfft_is_screen_review	HAV5_X_0083	A01	Thu Oct 01 07:26:22 EDT 2015	111153	Fly Light	Sample#2189421580658933858	f		screen	Rubin	Tanya Wolff	JRC_IS03946-20150904_45_F3	Drosophila melanogaster	20x
IS03947	this paper	w; 31A10-p65ADZp; MKRS/ TM6B_85H06-ZpGdbd in attP2	20150904_45_F4	rubing_wolfft_is_screen_review	HAV5_X_0083	A01	Thu Oct 01 07:26:24 EDT 2015	111154	Fly Light	Sample#2189421588703608930	f		screen	Rubin	Tanya Wolff	JRC_IS03947-20150904_45_F4	Drosophila melanogaster	20x
IS03948	this paper	w; 31A10-p65ADZp; MKRS/ TM6B_87H11-ZpGdbd in attP2/ TM3	20150904_45_F5	rubing_wolfft_is_screen_review	HAV5_X_0083	A01	Thu Oct 01 07:26:24 EDT 2015	111155	Fly Light	Sample#2189421590523936866	f		screen	Rubin	Tanya Wolff	JRC_IS03948-20150904_45_F5	Drosophila melanogaster	20x
IS03949	this paper	w; 31A10-p65ADZp; MKRS/ TM6B_89A06-ZpGdbd in attP2	20150904_45_F6	rubing_wolfft_is_screen_review	HAV5_X_0083	A01	Thu Oct 01 07:26:25 EDT 2015	111156	Fly Light	Sample#2189421594147815522	f		screen	Rubin	Tanya Wolff	JRC_IS03949-20150904_45_F6	Drosophila melanogaster	20x
IS03950	this paper	44A02-p65ADZp in attP40_HAV5; CyO/Sco; 13G10-ZpGDBD in attP2	20150904_46_A1	rubing_wolfft_is_screen_review	HAV5_X_0083	A01	Thu Oct 01 07:26:11 EDT 2015	111105	Fly Light	Sample#2189421534026661986	f		screen	Rubin	Tanya Wolff	JRC_IS03950-20150904_46_A1	Drosophila melanogaster	20x
IS03983	this paper	72D06-p65ADZp in attP40_10B11-ZpGdbd in attP2	20150904_45_H6	rubing_wolfft_is_screen_review	HAV5_X_0083	A01	Thu Oct 01 07:26:37 EDT 2015	111168	Fly Light	Sample#2189421643812569186	f		screen	Rubin	Tanya Wolff	JRC_IS03983-20150904_45_H6	Drosophila melanogaster	20x
IS03984	this paper	72D06-p65ADZp in attP40_13F12-ZpGdbd in attP2	20150904_45_H2	rubing_wolfft_is_screen_review	HAV5_X_0083	A01	Thu Oct 01 07:26:36 EDT 2015	111164	Fly Light	Sample#2189421642235510882	f		screen	Rubin	Tanya Wolff	JRC_IS03984-20150904_45_H2	Drosophila melanogaster	20x
IS03985	this paper	72D06-p65ADZp in attP40_17B02-ZpGdbd in attP2	20150904_45_G4	rubing_wolfft_is_screen_review	HAV5_X_0083	A01	Thu Oct 01 07:26:32 EDT 2015	111160	Fly Light	Sample#2189421622417424482	f		screen	Rubin	Tanya Wolff	JRC_IS03985-20150904_45_G4	Drosophila melanogaster	20x
IS03986	this paper	72D06-p65ADZp in attP40_22G07-ZpGdbd in attP2	20150904_45_I1	rubing_wolfft_is_screen_review	HAV5_X_0083	A01	Thu Oct 01 07:26:37 EDT 2015	111169	Fly Light	Sample#2189421644513017954	f		screen	Rubin	Tanya Wolff	JRC_IS03986-20150904_45_I1	Drosophila melanogaster	20x
IS03987	this paper	72D06-p65ADZp in attP40_32B03-ZpGdbd in attP2	20150904_46_A2	rubing_wolfft_is_screen_review	HAV5_X_0083	A01	Thu Oct 01 07:26:11 EDT 2015	111104	Fly Light	Sample#2189421534269931618	f		screen	Rubin	Tanya Wolff	JRC_IS03987-20150904_46_A2	Drosophila melanogaster	20x
IS03988	this paper	72D06-p65ADZp in attP40_32B07-ZpGdbd in attP2	20150904_45_I2	rubing_wolfft_is_screen_review	HAV5_X_0083	A01	Thu Oct 01 07:26:37 EDT 2015	111170	Fly Light	Sample#2189421645263798370	f		screen	Rubin	Tanya Wolff	JRC_IS03988-20150904_45_I2	Drosophila melanogaster	20x
IS03989	this paper	72D06-p65ADZp in attP40_41B12-ZpGdbd in attP2	20150911_44_B6	rubing_wolfft_is_screen_review	HAV5_X_0083	A01	Tue Oct 06 00:19:42 EDT 2015	111806	Fly Light	Sample#2191126144739180642	f		screen	Rubin	Tanya Wolff	JRC_IS03989-20150911_44_B6	Drosophila melanogaster	20x
IS03999	this paper	64C09-p65ADZp in attP40; MKRS/TM6B_24E09-ZpGdbd /TM3 in attP2	20201218_46_B5	schretterc_is_screen_review	UAS_Chrimson_Venus_X_0070	A01	Fri Jan 15 10:25:08 EST 2021	219053	Fly Light	Sample#2889977411997270049	f		screen			JRC_IS03999-20201218_46_B5	Drosophila melanogaster	20x
IS04017	this paper	20A03-p65ADZp in attP40_59G08-ZpGdbd in attP2	20150904_52_F3	rubing_dolanm_is_screen_review	HAV5_X_0083	A01	Mon Sep 21 14:17:01 EDT 2015	111005	Fly Light	Sample#2185901044603551842	f		screen	Terra Incognita	Michael-John Dolan	JRC_IS04017-20150904_52_F3	Drosophila melanogaster	20x
IS04018	this paper	20A03-p65ADZp in attP40_94D12-ZpGdbd in attP2	20151016_52_A5	rubing_dolanm_is_screen_review	UAS_Chrimson_Venus_X_0070	A01	Thu Oct 29 12:40:46 EDT 2015	114606	Fly Light	Sample#2199647564054134858	f		screen	Terra Incognita	Michael-John Dolan	JRC_IS04018-20151016_52_A5	Drosophila melanogaster	20x
IS04019	this paper	20A03-p65ADZp in attP40_94F11-ZpGdbd in attP2	20150904_52_G4	rubing_dolanm_is_screen_review	HAV5_X_0083	A01	Mon Sep 21 14:17:01 EDT 2015	111008	Fly Light	Sample#2185901045660516450	f		screen	Terra Incognita	Michael-John Dolan	JRC_IS04019-20150904_52_G4	Drosophila melanogaster	20x
IS04020	this paper	w; 20G01-p65ADZp; MKRS/ TM6B_HAV5; CyO/Sco; 14B11-ZpGDBD in attP2	20150904_52_A2	rubing_dolanm_is_screen_review	HAV5_X_0083	A01	Mon Sep 21 14:16:59 EDT 2015	110988	Fly Light	Sample#2185901039352283234	f		screen	Terra Incognita	Michael-John Dolan	JRC_IS04020-20150904_52_A2	Drosophila melanogaster	20x
IS04025	this paper	30H02-p65ADZp in attP40; MKRS/TM6B_94F11-ZpGdbd in attP2	20150904_52_H1	rubing_dolanm_is_screen_review	HAV5_X_0083	A01	Mon Sep 21 14:17:01 EDT 2015	111009	Fly Light	Sample#2185901046000255074	f		screen	Terra Incognita	Michael-John Dolan	JRC_IS04025-20150904_52_H1	Drosophila melanogaster	20x
IS04029	this paper	50H07-p65ADZp in attP40; MKRS/TM6B_HAV5; CyO/Sco; 28A10-ZpGDBD in attP2	20150904_52_C1	rubing_dolanm_is_screen_review	HAV5_X_0083	A01	Mon Sep 21 14:17:00 EDT 2015	110993	Fly Light	Sample#2185901041050976354	f		screen	Terra Incognita	Michael-John Dolan	JRC_IS04029-20150904_52_C1	Drosophila melanogaster	20x
IS04030	this paper	53C02-p65ADZp / CyO in attP40_19A04-ZpGdbd in attP2	20150904_52_A3	rubing_dolanm_is_screen_review	HAV5_X_0083	A01	Mon Sep 21 14:16:59 EDT 2015	110989	Fly Light	Sample#2185901039687827554	f		screen	Terra Incognita	Michael-John Dolan	JRC_IS04030-20150904_52_A3	Drosophila melanogaster	20x
IS04031	this paper	53C02-p65ADZp / CyO in attP40_41H09-ZpGDBD in attP2	20150904_52_D3	rubing_dolanm_is_screen_review	HAV5_X_0083	A01	Mon Sep 21 14:17:00 EDT 2015	110999	Fly Light	Sample#2185901042586091618	f		screen	Terra Incognita	Michael-John Dolan	JRC_IS04031-20150904_52_D3	Drosophila melanogaster	20x
IS04032	this paper	53C02-p65ADZp / CyO in attP40_53C10-ZpGdbd in attP2	20150904_52_E3	rubing_dolanm_is_screen_review	HAV5_X_0083	A01	Mon Sep 21 14:17:00 EDT 2015	111002	Fly Light	Sample#2185901043609501794	f		screen	Terra Incognita	Michael-John Dolan	JRC_IS04032-20150904_52_E3	Drosophila melanogaster	20x
IS04034	this paper	59G08-p65ADZp in attP40; MKRS/TM6B_54G12-ZpGdbd /TM3 in attP2	20150904_52_F1	rubing_dolanm_is_screen_review	HAV5_X_0083	A01	Mon Sep 21 14:17:00 EDT 2015	111003	Fly Light	Sample#2185901043932463202	f		screen	Terra Incognita	Michael-John Dolan	JRC_IS04034-20150904_52_F1	Drosophila melanogaster	20x
IS04035	this paper	65H10-p65ADZp in attP40; MKRS/TM6B_31D07-ZpGDBD in attP2	20150904_52_C3	rubing_dolanm_is_screen_review	HAV5_X_0083	A01	Mon Sep 21 14:17:00 EDT 2015	110996	Fly Light	Sample#2185901041705287778	f		screen	Terra Incognita	Michael-John Dolan	JRC_IS04035-20150904_52_C3	Drosophila melanogaster	20x
IS04037	this paper	82F03-p65ADZp in attP40_54G12-ZpGdbd /TM3 in attP2	20150904_52_F2	rubing_dolanm_is_screen_review	HAV5_X_0083	A01	Mon Sep 21 14:17:01 EDT 2015	111004	Fly Light	Sample#2185901044276396130	f		screen	Terra Incognita	Michael-John Dolan	JRC_IS04037-20150904_52_F2	Drosophila melanogaster	20x
IS04038	this paper	w; 89A01-p65ADZp; MKRS/TM6B_HAV5; CyO/Sco; 28A10-ZpGDBD in attP2	20150904_52_C2	rubing_dolanm_is_screen_review	HAV5_X_0083	A01	Mon Sep 21 14:17:00 EDT 2015	110994	Fly Light	Sample#2185901041373937762	f		screen	Terra Incognita	Michael-John Dolan	JRC_IS04038-20150904_52_C2	Drosophila melanogaster	20x
IS04039	this paper	93E08-p65ADZp in attP40_22B12-ZpGdbd in attP2	20150904_52_B2	rubing_dolanm_is_screen_review	HAV5_X_0083	A01	Mon Sep 21 14:17:00 EDT 2015	110991	Fly Light	Sample#2185901040371499106	f		screen	Terra Incognita	Michael-John Dolan	JRC_IS04039-20150904_52_B2	Drosophila melanogaster	20x
IS04040	this paper	93E08-p65ADZp in attP40_22C12-ZpGdbd in attP2/ TM3	20150904_52_B4	rubing_dolanm_is_screen_review	HAV5_X_0083	A01	Mon Sep 21 14:17:00 EDT 2015	110992	Fly Light	Sample#2185901040707043426	f		screen	Terra Incognita	Michael-John Dolan	JRC_IS04040-20150904_52_B4	Drosophila melanogaster	20x
IS04041	this paper	93E08-p65ADZp in attP40_HAV5; CyO/Sco; 34G01-ZpGDBD in attP2	20150904_52_D2	rubing_dolanm_is_screen_review	HAV5_X_0083	A01	Mon Sep 21 14:17:00 EDT 2015	110998	Fly Light	Sample#2185901042254741602	f		screen	Terra Incognita	Michael-John Dolan	JRC_IS04041-20150904_52_D2	Drosophila melanogaster	20x
IS04042	this paper	93E08-p65ADZp in attP40_47B03-ZpGDBD in attP2	20150904_52_E2	rubing_dolanm_is_screen_review	HAV5_X_0083	A01	Mon Sep 21 14:17:00 EDT 2015	111001	Fly Light	Sample#2185901043265568866	f		screen	Terra Incognita	Michael-John Dolan	JRC_IS04042-20150904_52_E2	Drosophila melanogaster	20x
IS04043	this paper	93E08-p65ADZp in attP40_59G08-ZpGdbd in attP2	20150904_52_G2	rubing_dolanm_is_screen_review	HAV5_X_0083	A01	Mon Sep 21 14:17:01 EDT 2015	111006	Fly Light	Sample#2185901044989427810	f		screen	Terra Incognita	Michael-John Dolan	JRC_IS04043-20150904_52_G2	Drosophila melanogaster	20x
IS04044	this paper	93E08-p65ADZp in attP40_95A10-ZpGdbd in attP2	20150904_52_H2	rubing_dolanm_is_screen_review	HAV5_X_0083	A01	Mon Sep 21 14:17:01 EDT 2015	111010	Fly Light	Sample#2185901046331605090	f		screen	Terra Incognita	Michael-John Dolan	JRC_IS04044-20150904_52_H2	Drosophila melanogaster	20x
IS04045	this paper	94D12-p65ADZp in attP40_HAV5; CyO/Sco; 47B01-ZpGDBD in attP2	20150904_52_E1	rubing_dolanm_is_screen_review	HAV5_X_0083	A01	Mon Sep 21 14:17:00 EDT 2015	111000	Fly Light	Sample#2185901042913247330	f		screen	Terra Incognita	Michael-John Dolan	JRC_IS04045-20150904_52_E1	Drosophila melanogaster	20x
IS04047	this paper	VT043086-p65ADZp in attP40_VT050279-ZpGDBD in attP2	20171208_43_F1	wangk11_is_screen_review	UAS_Chrimson_Venus_X_0070	A01	Fri Jan 05 19:30:09 EST 2018	163470	Fly Light	Sample#2489313591132422242	m		screen	Dickson	Kaiyu Wang	JRC_IS04047-20171208_43_F1	Drosophila melanogaster	20x
IS04077	this paper	10E07-p65ADZp in attP40; MKRS/TM6B_93F03-ZpGdbd in attP2	20150904_46_H2	rubing_wolfft_is_screen_review	HAV5_X_0083	A01	Thu Oct 01 07:26:27 EDT 2015	111171	Fly Light	Sample#2189421600544129122	f		screen	Rubin	Tanya Wolff	JRC_IS04077-20150904_46_H2	Drosophila melanogaster	20x
IS04078	this paper	11C05-p65ADZp in attP40; MKRS/TM6B_93F03-ZpGdbd in attP2	20181130_48_F1	rubing_wolfft_is_screen_review	UAS_Chrimson_Venus_X_0070	A01	Tue Dec 18 16:27:51 EST 2018	182489	Fly Light	Sample#2615016305622777954	f		screen	Rubin	Tanya Wolff	JRC_IS04078-20181130_48_F1	Drosophila melanogaster	20x
IS04079	this paper	20D01-p65ADZp in attP40_93F03-ZpGdbd in attP2	20150904_45_B3	rubing_wolfft_is_screen_review	HAV5_X_0083	A01	Thu Oct 01 07:26:11 EDT 2015	111265	Fly Light	Sample#2189421533493985378	f		screen	Rubin	Tanya Wolff	JRC_IS04079-20150904_45_B3	Drosophila melanogaster	20x
IS04080	this paper	21D06-p65ADZp in attP40_93F03-ZpGdbd in attP2	20150911_44_B2	rubing_wolfft_is_screen_review	HAV5_X_0083	A01	Tue Oct 06 00:19:41 EDT 2015	111802	Fly Light	Sample#2191126143917097058	f		screen	Rubin	Tanya Wolff	JRC_IS04080-20150911_44_B2	Drosophila melanogaster	20x
IS04081	this paper	22E02-p65ADZp in attP40_93F03-ZpGdbd in attP2	20150904_45_B5	rubing_wolfft_is_screen_review	HAV5_X_0083	A01	Thu Oct 01 07:26:11 EDT 2015	111273	Fly Light	Sample#2189421534525784162	f		screen	Rubin	Tanya Wolff	JRC_IS04081-20150904_45_B5	Drosophila melanogaster	20x
IS04082	this paper	w; 22E10-p65ADZp; MKRS/TM6B_93F03-ZpGdbd in attP2	20150911_44_A5	rubing_wolfft_is_screen_review	HAV5_X_0083	A01	Sat Oct 10 10:44:58 EDT 2015	111799	Fly Light	Sample#2192733051014873186	f		screen	Rubin	Tanya Wolff	JRC_IS04082-20150911_44_A5	Drosophila melanogaster	20x
IS04084	this paper	28D04-p65ADZp in attP40_93F03-ZpGdbd in attP2	20150904_45_B4	rubing_wolfft_is_screen_review	HAV5_X_0083	A01	Thu Oct 01 07:26:11 EDT 2015	111274	Fly Light	Sample#2189421533741449314	f		screen	Rubin	Tanya Wolff	JRC_IS04084-20150904_45_B4	Drosophila melanogaster	20x
IS04085	this paper	28G07-p65ADZp in attP40_93F03-ZpGdbd in attP2	20150904_45_D6	rubing_wolfft_is_screen_review	HAV5_X_0083	A01	Thu Oct 01 07:26:13 EDT 2015	111270	Fly Light	Sample#2189421545317728354	f		screen	Rubin	Tanya Wolff	JRC_IS04085-20150904_45_D6	Drosophila melanogaster	20x
IS04086	this paper	30A02-p65ADZp in attP40_93F03-ZpGdbd in attP2	20150904_45_H4	rubing_wolfft_is_screen_review	HAV5_X_0083	A01	Thu Oct 01 07:26:37 EDT 2015	111166	Fly Light	Sample#2189421643049205858	f		screen	Rubin	Tanya Wolff	JRC_IS04086-20150904_45_H4	Drosophila melanogaster	20x
IS04087	this paper	33B06-p65ADZp in attP40_93F03-ZpGdbd in attP2	20150904_46_C5	rubing_wolfft_is_screen_review	HAV5_X_0083	A01	Thu Oct 01 07:26:12 EDT 2015	111109	Fly Light	Sample#2189421538434875490	f		screen	Rubin	Tanya Wolff	JRC_IS04087-20150904_46_C5	Drosophila melanogaster	20x
IS04088	this paper	34C04-p65ADZp in attP40_93F03-ZpGdbd in attP2	20150911_44_A1	rubing_wolfft_is_screen_review	HAV5_X_0083	A01	Tue Oct 06 00:19:41 EDT 2015	111795	Fly Light	Sample#2191126142042243170	f		screen	Rubin	Tanya Wolff	JRC_IS04088-20150911_44_A1	Drosophila melanogaster	20x
IS04090	this paper	43B06-p65ADZp in attP40; MKRS/TM6B_93F03-ZpGdbd in attP2	20150904_45_A2	rubing_wolfft_is_screen_review	HAV5_X_0083	A01	Thu Oct 01 07:26:10 EDT 2015	111255	Fly Light	Sample#2189421532088893538	f		screen	Rubin	Tanya Wolff	JRC_IS04090-20150904_45_A2	Drosophila melanogaster	20x
IS04092	this paper	49A07-p65ADZp in attP40_93F03-ZpGdbd in attP2	20150904_45_D3	rubing_wolfft_is_screen_review	HAV5_X_0083	A01	Thu Oct 01 07:26:12 EDT 2015	111267	Fly Light	Sample#2189421538946580578	f		screen	Rubin	Tanya Wolff	JRC_IS04092-20150904_45_D3	Drosophila melanogaster	20x
IS04093	this paper	58H05-p65ADZp in attP40; MKRS/TM6B_93F03-ZpGdbd in attP2	20150904_45_A3	rubing_wolfft_is_screen_review	HAV5_X_0083	A01	Thu Oct 01 07:26:10 EDT 2015	111256	Fly Light	Sample#2189421532399272034	f		screen	Rubin	Tanya Wolff	JRC_IS04093-20150904_45_A3	Drosophila melanogaster	20x
IS04095	this paper	60C09-p65ADZp in attP40_93F03-ZpGdbd in attP2	20150904_46_C4	rubing_wolfft_is_screen_review	HAV5_X_0083	A01	Thu Oct 01 07:26:12 EDT 2015	111110	Fly Light	Sample#2189421537956724834	f		screen	Rubin	Tanya Wolff	JRC_IS04095-20150904_46_C4	Drosophila melanogaster	20x
IS04096	this paper	60C12-p65ADZp in attP40; MKRS/TM6B_93F03-ZpGdbd in attP2	20150904_46_H5	rubing_wolfft_is_screen_review	HAV5_X_0083	A01	Thu Oct 01 07:26:32 EDT 2015	111252	Fly Light	Sample#2189421622165766242	f		screen	Rubin	Tanya Wolff	JRC_IS04096-20150904_46_H5	Drosophila melanogaster	20x
IS04097	this paper	67A06-p65ADZp in attP40; MKRS/TM6B_93F03-ZpGdbd in attP2	20150904_46_H6	rubing_wolfft_is_screen_review	HAV5_X_0083	A01	Thu Oct 01 07:26:32 EDT 2015	111253	Fly Light	Sample#2189421623256285282	f		screen	Rubin	Tanya Wolff	JRC_IS04097-20150904_46_H6	Drosophila melanogaster	20x
IS04098	this paper	67B01-p65ADZp in attP40_93F03-ZpGdbd in attP2	20150904_45_B1	rubing_wolfft_is_screen_review	HAV5_X_0083	A01	Thu Oct 01 07:26:10 EDT 2015	111263	Fly Light	Sample#2189421532948725858	f		screen	Rubin	Tanya Wolff	JRC_IS04098-20150904_45_B1	Drosophila melanogaster	20x
IS04099	this paper	72H09-p65ADZp in attP40_93F03-ZpGdbd in attP2	20150904_45_A1	rubing_wolfft_is_screen_review	HAV5_X_0083	A01	Thu Oct 01 07:26:05 EDT 2015	111254	Fly Light	Sample#2189421509326405730	f		screen	Rubin	Tanya Wolff	JRC_IS04099-20150904_45_A1	Drosophila melanogaster	20x
IS04100	this paper	73B05-p65ADZp in attP40; MKRS/TM6B_93F03-ZpGdbd in attP2	20150904_46_H4	rubing_wolfft_is_screen_review	HAV5_X_0083	A01	Thu Oct 01 07:26:31 EDT 2015	111251	Fly Light	Sample#2189421619837927522	f		screen	Rubin	Tanya Wolff	JRC_IS04100-20150904_46_H4	Drosophila melanogaster	20x
IS04101	this paper	76G04-p65ADZp in attP40; MKRS/TM6B_93F03-ZpGdbd in attP2	20150911_44_B4	rubing_wolfft_is_screen_review	HAV5_X_0083	A01	Tue Oct 06 00:19:42 EDT 2015	111804	Fly Light	Sample#2191126146563702882	f		screen	Rubin	Tanya Wolff	JRC_IS04101-20150911_44_B4	Drosophila melanogaster	20x
IS04102	this paper	78B06-p65ADZp in attP40; MKRS/TM6B_93F03-ZpGdbd in attP2	20150904_46_H3	rubing_wolfft_is_screen_review	HAV5_X_0083	A01	Thu Oct 01 07:26:29 EDT 2015	111250	Fly Light	Sample#2189421611210244194	f		screen	Rubin	Tanya Wolff	JRC_IS04102-20150904_46_H3	Drosophila melanogaster	20x
IS04103	this paper	80C07-p65ADZp in attP40; MKRS/TM6B_93F03-ZpGdbd in attP2	20150911_44_B3	rubing_wolfft_is_screen_review	HAV5_X_0083	A01	Tue Oct 06 00:19:41 EDT 2015	111803	Fly Light	Sample#2191126144193921122	f		screen	Rubin	Tanya Wolff	JRC_IS04103-20150911_44_B3	Drosophila melanogaster	20x
IS04105	this paper	87C02-p65ADZp in attP40; MKRS/TM6B_93F03-ZpGdbd in attP2	20150904_45_D5	rubing_wolfft_is_screen_review	HAV5_X_0083	A01	Thu Oct 01 07:26:12 EDT 2015	111269	Fly Light	Sample#2189421540188094562	f		screen	Rubin	Tanya Wolff	JRC_IS04105-20150904_45_D5	Drosophila melanogaster	20x
IS04136	this paper	91A08-p65ADZp in attP40_93F03-ZpGdbd in attP2	20150904_45_D4	rubing_wolfft_is_screen_review	HAV5_X_0083	A01	Thu Oct 01 07:26:12 EDT 2015	111268	Fly Light	Sample#2189421539466674274	f		screen	Rubin	Tanya Wolff	JRC_IS04136-20150904_45_D4	Drosophila melanogaster	20x
IS04137	this paper	92A09-p65ADZp in attP40; MKRS/TM6B_93F03-ZpGdbd in attP2	20150904_45_B2	rubing_wolfft_is_screen_review	HAV5_X_0083	A01	Thu Oct 01 07:26:10 EDT 2015	111264	Fly Light	Sample#2189421533191995490	f		screen	Rubin	Tanya Wolff	JRC_IS04137-20150904_45_B2	Drosophila melanogaster	20x
IS04138	this paper	92G04-p65ADZp in attP40_93F03-ZpGdbd in attP2	20150904_46_D1	rubing_wolfft_is_screen_review	HAV5_X_0083	A01	Thu Oct 01 07:26:12 EDT 2015	111107	Fly Light	Sample#2189421539173072994	f		screen	Rubin	Tanya Wolff	JRC_IS04138-20150904_46_D1	Drosophila melanogaster	20x
IS04139	this paper	72D06-p65ADZp in attP40_48H04-ZpGdbd in attP2	20150904_46_A4	rubing_wolfft_is_screen_review	HAV5_X_0083	A01	Thu Oct 01 07:26:11 EDT 2015	111102	Fly Light	Sample#2189421534769053794	f		screen	Rubin	Tanya Wolff	JRC_IS04139-20150904_46_A4	Drosophila melanogaster	20x
IS04140	this paper	72D06-p65ADZp in attP40_49B07-ZpGdbd in attP2	20150904_46_A5	rubing_wolfft_is_screen_review	HAV5_X_0083	A01	Thu Oct 01 07:26:11 EDT 2015	111101	Fly Light	Sample#2189421535255593058	f		screen	Rubin	Tanya Wolff	JRC_IS04140-20150904_46_A5	Drosophila melanogaster	20x
IS04141	this paper	72D06-p65ADZp in attP40_50B11-ZpGdbd in attP2	20150911_44_B1	rubing_wolfft_is_screen_review	HAV5_X_0083	A01	Tue Oct 06 00:19:41 EDT 2015	111801	Fly Light	Sample#2191126143640272994	f		screen	Rubin	Tanya Wolff	JRC_IS04141-20150911_44_B1	Drosophila melanogaster	20x
IS04142	this paper	72D06-p65ADZp in attP40_52H10-ZpGdbd in attP2	20150904_46_B4	rubing_wolfft_is_screen_review	HAV5_X_0083	A01	Thu Oct 01 07:26:11 EDT 2015	111096	Fly Light	Sample#2189421536975257698	f		screen	Rubin	Tanya Wolff	JRC_IS04142-20150904_46_B4	Drosophila melanogaster	20x
IS04144	this paper	72D06-p65ADZp in attP40_54B05-ZpGdbd in attP2	20150904_46_B3	rubing_wolfft_is_screen_review	HAV5_X_0083	A01	Thu Oct 01 07:26:11 EDT 2015	111097	Fly Light	Sample#2189421536727793762	f		screen	Rubin	Tanya Wolff	JRC_IS04144-20150904_46_B3	Drosophila melanogaster	20x
IS04146	this paper	72D06-p65ADZp in attP40_70B04-ZpGdbd in attP2	20150904_46_B2	rubing_wolfft_is_screen_review	HAV5_X_0083	A01	Thu Oct 01 07:26:11 EDT 2015	111098	Fly Light	Sample#2189421536216088674	f		screen	Rubin	Tanya Wolff	JRC_IS04146-20150904_46_B2	Drosophila melanogaster	20x
IS04147	this paper	72D06-p65ADZp in attP40_72D01-ZpGdbd in attP2	20150911_44_B5	rubing_wolfft_is_screen_review	HAV5_X_0083	A01	Tue Oct 06 00:19:41 EDT 2015	111805	Fly Light	Sample#2191126144466550882	f		screen	Rubin	Tanya Wolff	JRC_IS04147-20150911_44_B5	Drosophila melanogaster	20x
IS04149	this paper	72D06-p65ADZp in attP40_76C05-ZpGdbd in attP2	20150904_46_A6	rubing_wolfft_is_screen_review	HAV5_X_0083	A01	Thu Oct 01 07:26:11 EDT 2015	111100	Fly Light	Sample#2189421535737938018	f		screen	Rubin	Tanya Wolff	JRC_IS04149-20150904_46_A6	Drosophila melanogaster	20x
IS04151	this paper	72D06-p65ADZp in attP40_80D07-ZpGdbd in attP2	20150911_44_A4	rubing_wolfft_is_screen_review	HAV5_X_0083	A01	Tue Oct 06 00:19:41 EDT 2015	111798	Fly Light	Sample#2191126142616862818	f		screen	Rubin	Tanya Wolff	JRC_IS04151-20150911_44_A4	Drosophila melanogaster	20x
IS04152	this paper	72D06-p65ADZp in attP40_81A04-ZpGdbd in attP2/ TM3	20150911_44_A6	rubing_wolfft_is_screen_review	HAV5_X_0083	A01	Tue Oct 06 00:19:41 EDT 2015	111800	Fly Light	Sample#2191126143367643234	f		screen	Rubin	Tanya Wolff	JRC_IS04152-20150911_44_A6	Drosophila melanogaster	20x
IS04153	this paper	72D06-p65ADZp in attP40_82H12-ZpGdbd in attP2/ TM3	20150904_46_D5	rubing_wolfft_is_screen_review	HAV5_X_0083	A01	Thu Oct 01 07:26:12 EDT 2015	111114	Fly Light	Sample#2189421539957407842	f		screen	Rubin	Tanya Wolff	JRC_IS04153-20150904_46_D5	Drosophila melanogaster	20x
IS04156	this paper	72D06-p65ADZp in attP40_89A06-ZpGdbd in attP2	20150911_44_A2	rubing_wolfft_is_screen_review	HAV5_X_0083	A01	Tue Oct 06 00:19:41 EDT 2015	111796	Fly Light	Sample#2191126142335844450	f		screen	Rubin	Tanya Wolff	JRC_IS04156-20150911_44_A2	Drosophila melanogaster	20x
IS04158	this paper	53D12-p65ADZp in attP40; MKRS/TM6B_VT018689-ZpGdbd in attP2	20151016_41_A1	ditp_is_screen_review	HAV5_X_0083	A01	Mon Nov 02 10:53:05 EST 2015	113936	Fly Light	Sample#2201085114312556618	f		screen	Descending Interneuron	Shigehiro Namiki	JRC_IS04158-20151016_41_A1	Drosophila melanogaster	20x
IS04159	this paper	59F08-p65ADZp in attP40; MKRS/TM6B_47H03-ZpGdbd in attP2	20150904_41_B6	ditp_is_screen_review	HAV5_X_0083	A01	Thu Oct 01 07:25:27 EDT 2015	111261	Fly Light	Sample#2189421352794980450	f		screen	Descending Interneuron	Shigehiro Namiki	JRC_IS04159-20150904_41_B6	Drosophila melanogaster	20x
IS04160	this paper	38H06-p65ADZp in attP40; MKRS/TM6B_50B07-ZpGdbd in attP2	20150904_41_D2	ditp_is_screen_review	HAV5_X_0083	A01	Thu Oct 01 07:25:28 EDT 2015	111260	Fly Light	Sample#2189421354963435618	f		screen	Descending Interneuron	Shigehiro Namiki	JRC_IS04160-20150904_41_D2	Drosophila melanogaster	20x
IS04161	this paper	59A06-p65ADZp in attP40; MKRS/TM6B_HAV5; CyO/Sco; 64B11-ZpGDBD in attP2	20150904_41_A1	ditp_is_screen_review	HAV5_X_0083	A01	Thu Oct 01 07:25:27 EDT 2015	111078	Fly Light	Sample#2189421349955436642	f		screen	Descending Interneuron	Shigehiro Namiki	JRC_IS04161-20150904_41_A1	Drosophila melanogaster	20x
IS04199	this paper	R9D11-p65ADZp in attP40; MKRS/TM6B_72G07-ZpGdbd in attP2	20150904_45_C1	rubing_wolfft_is_screen_review	HAV5_X_0083	A01	Thu Oct 01 07:26:11 EDT 2015	111118	Fly Light	Sample#2189421535503056994	f		screen	Rubin	Tanya Wolff	JRC_IS04199-20150904_45_C1	Drosophila melanogaster	20x
IS04201	this paper	VT023810-p65ADZp in attP40_VT024634-ZpGDBD in attP2	20150904_46_D3	rubing_wolfft_is_screen_review	HAV5_X_0083	A01	Thu Oct 01 07:26:12 EDT 2015	111116	Fly Light	Sample#2189421539714138210	f		screen	Rubin	Tanya Wolff	JRC_IS04201-20150904_46_D3	Drosophila melanogaster	20x
IS04259	this paper	VT043699-p65ADZp in attP40_28H03-ZpGdbd in attP2	20210618_41_A2	schretterc_is_screen_review	UAS_Chrimson_Venus_X_0070	A01	Thu Jul 01 16:17:07 EDT 2021	230519	Fly Light	Sample#2950569667275522146	f		screen	Rubin	Katie Schretter	JRC_IS04259-20210618_41_A2	Drosophila melanogaster	20x
IS04428	this paper	VT000605-p65ADZp in attP40_VT006486-ZpGDBD in attP2	20170901_51_H5	rubing_itom10_is_screen_review	UAS_Chrimson_Venus_X_0070	A	Thu Sep 21 09:55:21 EDT 2017	159053	Fly Light	Sample#2450740725906669666	f		screen	Terra Incognita	Masayoshi Ito	JRC_IS04428-20170901_51_H5	Drosophila melanogaster	20x
IS04444	this paper	21A07-p65ADZp in attP40_VT020016-ZpGdbd in attP2	20150904_46_C6	rubing_wolfft_is_screen_review	HAV5_X_0083	A01	Thu Oct 01 07:26:12 EDT 2015	111108	Fly Light	Sample#2189421538711699554	f		screen	Rubin	Tanya Wolff	JRC_IS04444-20150904_46_C6	Drosophila melanogaster	20x
IS04518	this paper	VT041043-p65ADZp in attP40_HAV5; CyO/Sco; 47F01-ZpGDBD in attP2	20150904_41_B3	ditp_is_screen_review	HAV5_X_0083	A01	Thu Oct 01 07:25:27 EDT 2015	111086	Fly Light	Sample#2189421351960313954	f		screen	Descending Interneuron	Shigehiro Namiki	JRC_IS04518-20150904_41_B3	Drosophila melanogaster	20x
IS04519	this paper	VT019022-p65ADZp in attP40_VT059224-ZpGdbd in attP2	20150904_41_B1	ditp_is_screen_review	HAV5_X_0083	A01	Thu Oct 01 07:25:27 EDT 2015	111084	Fly Light	Sample#2189421351381500002	f		screen	Descending Interneuron	Shigehiro Namiki	JRC_IS04519-20150904_41_B1	Drosophila melanogaster	20x
IS04520	this paper	VT019022-p65ADZp in attP40_VT017249-ZpGDBD in attP2	20150904_41_B5	ditp_is_screen_review	HAV5_X_0083	A01	Thu Oct 01 07:25:27 EDT 2015	111088	Fly Light	Sample#2189421352526544994	f		screen	Descending Interneuron	Shigehiro Namiki	JRC_IS04520-20150904_41_B5	Drosophila melanogaster	20x
IS04521	this paper	VT008681-p65ADZp in attP40_VT019022-ZpGdbd in attP2	20150904_41_A6	ditp_is_screen_review	HAV5_X_0083	A01	Thu Oct 01 07:25:27 EDT 2015	111083	Fly Light	Sample#2189421351117258850	f		screen	Descending Interneuron	Shigehiro Namiki	JRC_IS04521-20150904_41_A6	Drosophila melanogaster	20x
IS04523	this paper	VT037825-p65ADZ in attP40_VT040044-ZpGDBD in attP2	20150904_41_B2	ditp_is_screen_review	HAV5_X_0083	A01	Thu Oct 01 07:25:27 EDT 2015	111085	Fly Light	Sample#2189421351687684194	f		screen	Descending Interneuron	Shigehiro Namiki	JRC_IS04523-20150904_41_B2	Drosophila melanogaster	20x
IS04524	this paper	VT037825-p65ADZ in attP40_18B05-ZpGdbd in attP2	20150904_41_C1	ditp_is_screen_review	HAV5_X_0083	A01	Thu Oct 01 07:25:28 EDT 2015	111089	Fly Light	Sample#2189421353080193122	f		screen	Descending Interneuron	Shigehiro Namiki	JRC_IS04524-20150904_41_C1	Drosophila melanogaster	20x
IS04526	this paper	VT017240-p65ADZp in attP40_VT058563-ZpGdbd in attP2	20150904_41_C3	ditp_is_screen_review	HAV5_X_0083	A01	Thu Oct 01 07:25:28 EDT 2015	111091	Fly Light	Sample#2189421353596092514	f		screen	Descending Interneuron	Shigehiro Namiki	JRC_IS04526-20150904_41_C3	Drosophila melanogaster	20x
IS04527	this paper	19C07-p65ADZp in attP40_VT017116-ZpGdbd in attP2	20150904_41_C2	ditp_is_screen_review	HAV5_X_0083	A01	Thu Oct 01 07:25:28 EDT 2015	111090	Fly Light	Sample#2189421353340239970	f		screen	Descending Interneuron	Shigehiro Namiki	JRC_IS04527-20150904_41_C2	Drosophila melanogaster	20x
IS04528	this paper	19G08-p65ADZp in attP40_HAV5; CyO/Sco; 47F01-ZpGDBD in attP2	20150904_41_C4	ditp_is_screen_review	HAV5_X_0083	A01	Thu Oct 01 07:25:28 EDT 2015	111092	Fly Light	Sample#2189421353856139362	f		screen	Descending Interneuron	Shigehiro Namiki	JRC_IS04528-20150904_41_C4	Drosophila melanogaster	20x
IS04529	this paper	40D05-p65ADZp in attP40; MKRS/TM6B_10F07-ZpGdbd in attP2	20150904_41_A4	ditp_is_screen_review	HAV5_X_0083	A01	Thu Oct 01 07:25:27 EDT 2015	111081	Fly Light	Sample#2189421350840434786	f		screen	Descending Interneuron	Shigehiro Namiki	JRC_IS04529-20150904_41_A4	Drosophila melanogaster	20x
IS04530	this paper	40F04-p65ADZp in attP40_83B06-ZpGdbd in attP2	20150904_41_B4	ditp_is_screen_review	HAV5_X_0083	A01	Thu Oct 01 07:25:27 EDT 2015	111087	Fly Light	Sample#2189421352220360802	f		screen	Descending Interneuron	Shigehiro Namiki	JRC_IS04530-20150904_41_B4	Drosophila melanogaster	20x
IS04532	this paper	72H06-p65ADZp in attP40_VT033290-ZpGdbd in attP2	20150904_41_C5	ditp_is_screen_review	HAV5_X_0083	A01	Thu Oct 01 07:25:28 EDT 2015	111093	Fly Light	Sample#2189421354116186210	f		screen	Descending Interneuron	Shigehiro Namiki	JRC_IS04532-20150904_41_C5	Drosophila melanogaster	20x
IS04536	this paper	w; 48G06-p65ADZp; MKRS/TM6B_VT029515-ZpGdbd in attP2	20210108_45_A1	minegishir_is_screen_review	UAS_Chrimson_Venus_X_0070	A01	Thu Jan 28 14:17:34 EST 2021	219342	Fly Light	Sample#2894746950555402338	f		screen	Dickson	Ryo Minegishi	JRC_IS04536-20210108_45_A1	Drosophila melanogaster	20x
IS04539	this paper	52F12-p65ADZp in attP40_VT006403-ZpGDBD in attP2	20210423_49_B3	ditp_is_screen_review	UAS_Chrimson_Venus_X_0070	A01	Thu May 13 13:54:10 EDT 2021	225937	Fly Light	Sample#2932776684799131746	f		screen	Descending Interneuron	Shigehiro Namiki	JRC_IS04539-20210423_49_B3	Drosophila melanogaster	20x
IS04696	this paper	VT008172-p65ADZp in attP40_VT002226-ZpGDBD in attP2	20150904_48_B2	rubing_wolfft_is_screen_review	HAV5_X_0083	A01	Thu Oct 01 07:26:37 EDT 2015	110983	Fly Light	Sample#2189421644068421730	f		screen	Rubin	Tanya Wolff	JRC_IS04696-20150904_48_B2	Drosophila melanogaster	20x
IS04697	this paper	VT008172-p65ADZp in attP40_27A07-ZpGdbd in attP2	20150911_44_C5	rubing_wolfft_is_screen_review	HAV5_X_0083	A01	Sat Oct 10 10:44:58 EDT 2015	111811	Fly Light	Sample#2192733053476929634	f		screen	Rubin	Tanya Wolff	JRC_IS04697-20150911_44_C5	Drosophila melanogaster	20x
IS04698	this paper	VT008172-p65ADZp in attP40_32A11-ZpGdbd in attP2	20150904_45_C4	rubing_wolfft_is_screen_review	HAV5_X_0083	A01	Thu Oct 01 07:26:11 EDT 2015	111121	Fly Light	Sample#2189421535981207650	f		screen	Rubin	Tanya Wolff	JRC_IS04698-20150904_45_C4	Drosophila melanogaster	20x
IS04699	this paper	VT008172-p65ADZp in attP40_49A11-ZpGdbd in attP2	20150911_44_D5	rubing_wolfft_is_screen_review	HAV5_X_0083	A01	Tue Oct 06 00:19:42 EDT 2015	111817	Fly Light	Sample#2191126146278490210	f		screen	Rubin	Tanya Wolff	JRC_IS04699-20150911_44_D5	Drosophila melanogaster	20x
IS04700	this paper	VT008172-p65ADZp in attP40_53C01-ZpGdbd in attP2	20150904_45_C5	rubing_wolfft_is_screen_review	HAV5_X_0083	A01	Thu Oct 01 07:26:11 EDT 2015	111122	Fly Light	Sample#2189421536471941218	f		screen	Rubin	Tanya Wolff	JRC_IS04700-20150904_45_C5	Drosophila melanogaster	20x
IS04701	this paper	VT008172-p65ADZp in attP40_75B09-ZpGdbd in attP2	20150911_43_C1	rubing_wolfft_is_screen_review	HAV5_X_0083	A01	Thu Oct 01 07:26:40 EDT 2015	111707	Fly Light	Sample#2189421656047353954	f		screen	Rubin	Tanya Wolff	JRC_IS04701-20150911_43_C1	Drosophila melanogaster	20x
IS04706	this paper	VT010264-p65ADZp in attP40_VT002226-ZpGDBD in attP2	20150911_43_D6	rubing_wolfft_is_screen_review	HAV5_X_0083	A01	Thu Oct 01 07:26:40 EDT 2015	111725	Fly Light	Sample#2189421658731708514	f		screen	Rubin	Tanya Wolff	JRC_IS04706-20150911_43_D6	Drosophila melanogaster	20x
IS04708	this paper	VT010264-p65ADZp in attP40_26D09-ZpGdbd in attP2	20150904_47_E4	rubing_wolfft_is_screen_review	HAV5_X_0083	A01	Thu Oct 01 07:26:38 EDT 2015	110936	Fly Light	Sample#2189421647662940258	f		screen	Rubin	Tanya Wolff	JRC_IS04708-20150904_47_E4	Drosophila melanogaster	20x
IS04709	this paper	VT010264-p65ADZp in attP40_49C12-ZpGdbd in attP2	20150904_47_C4	rubing_wolfft_is_screen_review	HAV5_X_0083	A01	Thu Oct 01 07:26:36 EDT 2015	110922	Fly Light	Sample#2189421641937715298	f		screen	Rubin	Tanya Wolff	JRC_IS04709-20150904_47_C4	Drosophila melanogaster	20x
IS04710	this paper	VT010264-p65ADZp in attP40_53H08-ZpGdbd in attP2	20150911_43_H4	rubing_wolfft_is_screen_review	HAV5_X_0083	A01	Thu Oct 01 07:26:42 EDT 2015	111686	Fly Light	Sample#2189421663269945442	f		screen	Rubin	Tanya Wolff	JRC_IS04710-20150911_43_H4	Drosophila melanogaster	20x
IS04711	this paper	VT010264-p65ADZp in attP40_75B09-ZpGdbd in attP2	20150911_44_D2	rubing_wolfft_is_screen_review	HAV5_X_0083	A01	Tue Oct 06 00:19:42 EDT 2015	111814	Fly Light	Sample#2191126146010054754	f		screen	Rubin	Tanya Wolff	JRC_IS04711-20150911_44_D2	Drosophila melanogaster	20x
IS04712	this paper	VT045108-p65ADZp in attP40_VT010264-ZpGDBD in attP2	20150904_48_E6	rubing_wolfft_is_screen_review	HAV5_X_0083	A01	Thu Oct 01 07:26:39 EDT 2015	110982	Fly Light	Sample#2189421653023260770	f		screen	Rubin	Tanya Wolff	JRC_IS04712-20150904_48_E6	Drosophila melanogaster	20x
IS04713	this paper	VT045108-p65ADZp in attP40_VT024099-ZpGdbd in attP2	20150918_43_A2	rubing_wolfft_is_screen_review	HAV5_X_0083	A01	Thu Oct 01 16:34:55 EDT 2015	112046	Fly Light	Sample#2189559626935042146	f		screen	Rubin	Tanya Wolff	JRC_IS04713-20150918_43_A2	Drosophila melanogaster	20x
IS04728	this paper	VT040346-p65ADZ in attP40_VT050658-ZpGDBD in attP2	20160909_41_A3	dicksonb_is_screen_review	HAV5_X_0083	A01	Tue Oct 04 09:15:18 EDT 2016	133958	Fly Light	Sample#2323170118755942545	m		screen	Dickson	Barry Dickson	JRC_IS04728-20160909_41_A3	Drosophila melanogaster	20x
IS04752	this paper	VT011146-p65ADZp in attP40_VT010264-ZpGDBD in attP2	20150904_48_C3	rubing_wolfft_is_screen_review	HAV5_X_0083	A01	Thu Oct 01 07:26:38 EDT 2015	110964	Fly Light	Sample#2189421647918792802	f		screen	Rubin	Tanya Wolff	JRC_IS04752-20150904_48_C3	Drosophila melanogaster	20x
IS04753	this paper	VT011146-p65ADZp in attP40_VT013334-ZpGDbd in attP2	20150911_43_I1	rubing_wolfft_is_screen_review	HAV5_X_0083	A01	Thu Oct 01 16:34:54 EDT 2015	111690	Fly Light	Sample#2189559625391538274	f		screen	Rubin	Tanya Wolff	JRC_IS04753-20150911_43_I1	Drosophila melanogaster	20x
IS04755	this paper	VT011146-p65ADZp in attP40_49C12-ZpGdbd in attP2	20150911_43_F4	rubing_wolfft_is_screen_review	HAV5_X_0083	A01	Thu Oct 01 07:26:41 EDT 2015	111695	Fly Light	Sample#2189421660606562402	f		screen	Rubin	Tanya Wolff	JRC_IS04755-20150911_43_F4	Drosophila melanogaster	20x
IS04756	this paper	VT012299-p65ADZp in attP40_VT023820-ZpGDBD in attP2	20151016_44_A4	rubing_wolfft_is_screen_review	HAV5_X_0083	A01	Sun Nov 01 21:29:21 EST 2015	113937	Fly Light	Sample#2200882848775274570	f		screen	Rubin	Tanya Wolff	JRC_IS04756-20151016_44_A4	Drosophila melanogaster	20x
IS04756	this paper	VT012299-p65ADZp in attP40_VT023820-ZpGDBD in attP2	20151120_42_B3	rubing_wolfft_is_screen_review	HAV5_X_0083	A01	Fri Dec 11 11:33:59 EST 2015	116590	Fly Light	Sample#2215228533779726373	f		screen	Rubin	Tanya Wolff	JRC_IS04756-20151120_42_B3	Drosophila melanogaster	20x
IS04757	this paper	VT012299-p65ADZp in attP40_54B11-ZpGdbd in attP2	20150904_48_D6	rubing_wolfft_is_screen_review	HAV5_X_0083	A01	Thu Oct 01 07:26:38 EDT 2015	110975	Fly Light	Sample#2189421650569592930	f		screen	Rubin	Tanya Wolff	JRC_IS04757-20150904_48_D6	Drosophila melanogaster	20x
IS04758	this paper	VT008424-p65ADZp in attP40_VT008172-ZpGdbd in attP2	20150911_43_A2	rubing_wolfft_is_screen_review	HAV5_X_0083	A01	Thu Oct 01 07:26:39 EDT 2015	111719	Fly Light	Sample#2189421653585297506	f		screen	Rubin	Tanya Wolff	JRC_IS04758-20150911_43_A2	Drosophila melanogaster	20x
IS04759	this paper	VT008424-p65ADZp in attP40_VT013334-ZpGDbd in attP2	20151016_44_C1	rubing_wolfft_is_screen_review	HAV5_X_0083	A01	Sun Nov 01 21:29:22 EST 2015	113519	Fly Light	Sample#2200882851472212042	f		screen	Rubin	Tanya Wolff	JRC_IS04759-20151016_44_C1	Drosophila melanogaster	20x
IS04760	this paper	VT008424-p65ADZp in attP40_VT023820-ZpGDBD in attP2	20150911_43_A1	rubing_wolfft_is_screen_review	HAV5_X_0083	A01	Thu Oct 01 07:26:39 EDT 2015	111718	Fly Light	Sample#2189421653295890530	f		screen	Rubin	Tanya Wolff	JRC_IS04760-20150911_43_A1	Drosophila melanogaster	20x
IS04762	this paper	VT008424-p65ADZp in attP40_14G08-ZpGdbd in attP2	20150911_44_D1	rubing_wolfft_is_screen_review	HAV5_X_0083	A01	Tue Oct 06 00:19:41 EDT 2015	111813	Fly Light	Sample#2191126142906269794	f		screen	Rubin	Tanya Wolff	JRC_IS04762-20150911_44_D1	Drosophila melanogaster	20x
IS04763	this paper	VT008424-p65ADZp in attP40_26D09-ZpGdbd in attP2	20150911_44_C2	rubing_wolfft_is_screen_review	HAV5_X_0083	A01	Tue Oct 06 00:19:42 EDT 2015	111808	Fly Light	Sample#2191126145011810402	f		screen	Rubin	Tanya Wolff	JRC_IS04763-20150911_44_C2	Drosophila melanogaster	20x
IS04764	this paper	VT008424-p65ADZp in attP40_32A11-ZpGdbd in attP2	20150925_41_B1	rubing_wolfft_is_screen_review	HAV5_X_0083	A01	Mon Oct 12 16:48:09 EDT 2015	112604	Fly Light	Sample#2193549225336242274	f		screen	Rubin	Tanya Wolff	JRC_IS04764-20150925_41_B1	Drosophila melanogaster	20x
IS04765	this paper	VT008424-p65ADZp in attP40_49A11-ZpGdbd in attP2	20150911_44_C4	rubing_wolfft_is_screen_review	HAV5_X_0083	A01	Tue Oct 06 00:19:42 EDT 2015	111810	Fly Light	Sample#2191126145561264226	f		screen	Rubin	Tanya Wolff	JRC_IS04765-20150911_44_C4	Drosophila melanogaster	20x
IS04766	this paper	VT008424-p65ADZp in attP40_75B09-ZpGdbd in attP2	20150911_44_C3	rubing_wolfft_is_screen_review	HAV5_X_0083	A01	Tue Oct 06 00:19:42 EDT 2015	111809	Fly Light	Sample#2191126145284440162	f		screen	Rubin	Tanya Wolff	JRC_IS04766-20150911_44_C3	Drosophila melanogaster	20x
IS04767	this paper	VT009857-p65ADZp in attP40_81E05-ZpGdbd in attP2	20151016_44_C2	rubing_wolfft_is_screen_review	HAV5_X_0083	A01	Sun Nov 01 21:29:22 EST 2015	113532	Fly Light	Sample#2200882852017471562	f		screen	Rubin	Tanya Wolff	JRC_IS04767-20151016_44_C2	Drosophila melanogaster	20x
IS04771	this paper	VT014706-p65ADZp in attP40_VT010264-ZpGDBD in attP2	20150911_43_D1	rubing_wolfft_is_screen_review	HAV5_X_0083	A01	Thu Oct 01 07:26:40 EDT 2015	111713	Fly Light	Sample#2189421657683132514	f		screen	Rubin	Tanya Wolff	JRC_IS04771-20150911_43_D1	Drosophila melanogaster	20x
IS04780	this paper	49H12-p65ADZp in attP40_VT002226-ZpGDBD in attP2	20150911_43_D5	rubing_wolfft_is_screen_review	HAV5_X_0083	A01	Thu Oct 01 16:34:54 EDT 2015	111717	Fly Light	Sample#2189559625072771170	f		screen	Rubin	Tanya Wolff	JRC_IS04780-20150911_43_D5	Drosophila melanogaster	20x
IS04792	this paper	VT008172-p65ADZp in attP40_VT021842-ZpGDBD in attP2	20150904_47_D3	rubing_wolfft_is_screen_review	HAV5_X_0083	A01	Thu Oct 01 16:34:54 EDT 2015	110928	Fly Light	Sample#2189559625701916770	f		screen	Rubin	Tanya Wolff	JRC_IS04792-20150904_47_D3	Drosophila melanogaster	20x
IS04792	this paper	VT008172-p65ADZp in attP40_VT021842-ZpGDBD in attP2	20151016_44_A2	rubing_wolfft_is_screen_review	HAV5_X_0083	A01	Sun Nov 01 21:29:21 EST 2015	113526	Fly Light	Sample#2200882847701532746	f		screen	Rubin	Tanya Wolff	JRC_IS04792-20151016_44_A2	Drosophila melanogaster	20x
IS04793	this paper	VT019073-p65ADZp in attP40_VT021842-ZpGDBD in attP2	20150904_48_B3	rubing_wolfft_is_screen_review	HAV5_X_0083	A01	Thu Oct 01 16:34:54 EDT 2015	110985	Fly Light	Sample#2189559626305896546	f		screen	Rubin	Tanya Wolff	JRC_IS04793-20150904_48_B3	Drosophila melanogaster	20x
IS04795	this paper	VT028328-p65ADZp in attP40_VT009857-ZpGDBD in attP2	20150904_48_C1	rubing_wolfft_is_screen_review	HAV5_X_0083	A01	Thu Oct 01 07:26:38 EDT 2015	110962	Fly Light	Sample#2189421646849245282	f		screen	Rubin	Tanya Wolff	JRC_IS04795-20150904_48_C1	Drosophila melanogaster	20x
IS04796	this paper	VT000775-p65ADZp in attP40_VT002226-ZpGDBD in attP2	20150904_47_F3	rubing_wolfft_is_screen_review	HAV5_X_0083	A01	Thu Oct 01 07:26:38 EDT 2015	110940	Fly Light	Sample#2189421649508434018	f		screen	Rubin	Tanya Wolff	JRC_IS04796-20150904_47_F3	Drosophila melanogaster	20x
IS04797	this paper	VT000775-p65ADZp in attP40_VT010264-ZpGDBD in attP2	20150904_47_E1	rubing_wolfft_is_screen_review	HAV5_X_0083	A01	Thu Oct 01 07:26:38 EDT 2015	110932	Fly Light	Sample#2189421646585004130	f		screen	Rubin	Tanya Wolff	JRC_IS04797-20150904_47_E1	Drosophila melanogaster	20x
IS04799	this paper	VT000775-p65ADZp in attP40_VT021842-ZpGDBD in attP2	20150904_48_D1	rubing_wolfft_is_screen_review	HAV5_X_0083	A01	Thu Oct 01 16:34:55 EDT 2015	110970	Fly Light	Sample#2189559626620469346	f		screen	Rubin	Tanya Wolff	JRC_IS04799-20150904_48_D1	Drosophila melanogaster	20x
IS04800	this paper	VT014117-p65ADZ in attP40_VT020016-ZpGdbd in attP2	20150904_48_C4	rubing_wolfft_is_screen_review	HAV5_X_0083	A01	Thu Oct 01 07:26:38 EDT 2015	110967	Fly Light	Sample#2189421648438886498	f		screen	Rubin	Tanya Wolff	JRC_IS04800-20150904_48_C4	Drosophila melanogaster	20x
IS04801	this paper	VT016996-p65ADZp in attP40_VT002226-ZpGDBD in attP2	20150904_47_E2	rubing_wolfft_is_screen_review	HAV5_X_0083	A01	Thu Oct 01 07:26:38 EDT 2015	110933	Fly Light	Sample#2189421647113486434	f		screen	Rubin	Tanya Wolff	JRC_IS04801-20150904_47_E2	Drosophila melanogaster	20x
IS04802	this paper	VT016996-p65ADZp in attP40_VT008172-ZpGdbd in attP2	20150904_47_B1	rubing_wolfft_is_screen_review	HAV5_X_0083	A01	Thu Oct 01 07:26:25 EDT 2015	110907	Fly Light	Sample#2189421591920640098	f		screen	Rubin	Tanya Wolff	JRC_IS04802-20150904_47_B1	Drosophila melanogaster	20x
IS04803	this paper	VT016996-p65ADZp in attP40_VT010264-ZpGDBD in attP2	20150904_47_D1	rubing_wolfft_is_screen_review	HAV5_X_0083	A01	Thu Oct 01 07:26:37 EDT 2015	110926	Fly Light	Sample#2189421644290719842	f		screen	Rubin	Tanya Wolff	JRC_IS04803-20150904_47_D1	Drosophila melanogaster	20x
IS04804	this paper	VT016996-p65ADZp in attP40_32A11-ZpGdbd in attP2	20150918_43_C1	rubing_wolfft_is_screen_review	HAV5_X_0083	A01	Thu Oct 01 16:34:55 EDT 2015	112041	Fly Light	Sample#2189559628793118818	f		screen	Rubin	Tanya Wolff	JRC_IS04804-20150918_43_C1	Drosophila melanogaster	20x
IS04805	this paper	VT016996-p65ADZp in attP40_49A11-ZpGdbd in attP2	20150904_47_F1	rubing_wolfft_is_screen_review	HAV5_X_0083	A01	Thu Oct 01 07:26:38 EDT 2015	110938	Fly Light	Sample#2189421648707321954	f		screen	Rubin	Tanya Wolff	JRC_IS04805-20150904_47_F1	Drosophila melanogaster	20x
IS04806	this paper	VT016996-p65ADZp in attP40_53H08-ZpGdbd in attP2	20150904_47_C3	rubing_wolfft_is_screen_review	HAV5_X_0083	A01	Thu Oct 01 07:26:36 EDT 2015	110921	Fly Light	Sample#2189421641031745634	f		screen	Rubin	Tanya Wolff	JRC_IS04806-20150904_47_C3	Drosophila melanogaster	20x
IS04807	this paper	VT016996-p65ADZp in attP40_75B09-ZpGdbd in attP2	20150904_47_C1	rubing_wolfft_is_screen_review	HAV5_X_0083	A01	Thu Oct 01 07:26:32 EDT 2015	110919	Fly Light	Sample#2189421623528915042	f		screen	Rubin	Tanya Wolff	JRC_IS04807-20150904_47_C1	Drosophila melanogaster	20x
IS04808	this paper	VT020824-p65ADZp in attP40_VT023820-ZpGDBD in attP2	20150904_48_B6	rubing_wolfft_is_screen_review	HAV5_X_0083	A01	Thu Oct 01 07:26:37 EDT 2015	110961	Fly Light	Sample#2189421646069104738	f		screen	Rubin	Tanya Wolff	JRC_IS04808-20150904_48_B6	Drosophila melanogaster	20x
IS04809	this paper	VT045282-p65ADZ in attP40_VT013334-ZpGDbd in attP2	20150904_48_D2	rubing_wolfft_is_screen_review	HAV5_X_0083	A01	Thu Oct 01 07:26:38 EDT 2015	110971	Fly Light	Sample#2189421649772675170	f		screen	Rubin	Tanya Wolff	JRC_IS04809-20150904_48_D2	Drosophila melanogaster	20x
IS04810	this paper	VT045282-p65ADZ in attP40_75B09-ZpGdbd in attP2	20150904_48_B5	rubing_wolfft_is_screen_review	HAV5_X_0083	A01	Thu Oct 01 07:26:37 EDT 2015	110960	Fly Light	Sample#2189421645528039522	f		screen	Rubin	Tanya Wolff	JRC_IS04810-20150904_48_B5	Drosophila melanogaster	20x
IS04812	this paper	VT008882-p65ADZp in attP40_VT045108-ZpGdbd in attP2	20150904_48_E4	rubing_wolfft_is_screen_review	HAV5_X_0083	A01	Thu Oct 01 07:26:39 EDT 2015	110980	Fly Light	Sample#2189421651915964514	f		screen	Rubin	Tanya Wolff	JRC_IS04812-20150904_48_E4	Drosophila melanogaster	20x
IS04814	this paper	VT016795-p65ADZ in attP40_72G09-ZpGdbd in attP2	20150918_43_C2	rubing_wolfft_is_screen_review	HAV5_X_0083	A01	Thu Oct 01 16:34:55 EDT 2015	112044	Fly Light	Sample#2189559629099303010	f		screen	Rubin	Tanya Wolff	JRC_IS04814-20150918_43_C2	Drosophila melanogaster	20x
IS04815	this paper	VT029750-p65ADZp in attP40_VT008172-ZpGdbd in attP2	20151016_44_B6	rubing_wolfft_is_screen_review	HAV5_X_0083	A01	Sun Nov 01 21:29:22 EST 2015	113517	Fly Light	Sample#2200882851023421514	f		screen	Rubin	Tanya Wolff	JRC_IS04815-20151016_44_B6	Drosophila melanogaster	20x
IS04816	this paper	VT029750-p65ADZp in attP40_VT010264-ZpGDBD in attP2	20151120_42_C3	rubing_wolfft_is_screen_review	HAV5_X_0083	A01	Fri Dec 11 11:33:59 EST 2015	116727	Fly Light	Sample#2215228535700717605	f		screen	Rubin	Tanya Wolff	JRC_IS04816-20151120_42_C3	Drosophila melanogaster	20x
IS04817	this paper	VT038873-p65ADZ in attP40_VT045108-ZpGdbd in attP2	20150904_47_B6	rubing_wolfft_is_screen_review	HAV5_X_0083	A01	Thu Oct 01 07:26:32 EDT 2015	110918	Fly Light	Sample#2189421622941712482	f		screen	Rubin	Tanya Wolff	JRC_IS04817-20150904_47_B6	Drosophila melanogaster	20x
IS04818	this paper	VT038873-p65ADZ in attP40_VT011146-ZpGdbd in attP2	20150904_47_B3	rubing_wolfft_is_screen_review	HAV5_X_0083	A01	Thu Oct 01 07:26:28 EDT 2015	110913	Fly Light	Sample#2189421605086560354	f		screen	Rubin	Tanya Wolff	JRC_IS04818-20150904_47_B3	Drosophila melanogaster	20x
IS04819	this paper	VT038873-p65ADZ in attP40_VT014706-ZpGdbd in attP2	20150904_47_D6	rubing_wolfft_is_screen_review	HAV5_X_0083	A01	Thu Oct 01 07:26:37 EDT 2015	110931	Fly Light	Sample#2189421646320762978	f		screen	Rubin	Tanya Wolff	JRC_IS04819-20150904_47_D6	Drosophila melanogaster	20x
IS04820	this paper	VT038873-p65ADZ in attP40_VT010265-ZpGdbd in attP2	20150904_47_A6	rubing_wolfft_is_screen_review	HAV5_X_0083	A01	Thu Oct 01 07:26:24 EDT 2015	110905	Fly Light	Sample#2189421589882208354	f		screen	Rubin	Tanya Wolff	JRC_IS04820-20150904_47_A6	Drosophila melanogaster	20x
IS04821	this paper	VT038873-p65ADZ in attP40_VT024099-ZpGdbd in attP2	20150904_48_D4	rubing_wolfft_is_screen_review	HAV5_X_0083	A01	Thu Oct 01 07:26:38 EDT 2015	110973	Fly Light	Sample#2189421650045304930	f		screen	Rubin	Tanya Wolff	JRC_IS04821-20150904_48_D4	Drosophila melanogaster	20x
IS04822	this paper	VT038873-p65ADZ in attP40_VT021842-ZpGDBD in attP2	20150904_47_E3	rubing_wolfft_is_screen_review	HAV5_X_0083	A01	Thu Oct 01 16:34:54 EDT 2015	110934	Fly Light	Sample#2189559626003906658	f		screen	Rubin	Tanya Wolff	JRC_IS04822-20150904_47_E3	Drosophila melanogaster	20x
IS04824	this paper	VT054914-p65ADZ in attP40_72G06-ZpGdbd in attP2	20150904_48_C6	rubing_wolfft_is_screen_review	HAV5_X_0083	A01	Thu Oct 01 07:26:38 EDT 2015	110969	Fly Light	Sample#2189421648971563106	f		screen	Rubin	Tanya Wolff	JRC_IS04824-20150904_48_C6	Drosophila melanogaster	20x
IS04825	this paper	VT000360-p65ADZ in attP40_VT045108-ZpGdbd in attP2	20150911_43_G4	rubing_wolfft_is_screen_review	HAV5_X_0083	A01	Thu Oct 01 07:26:41 EDT 2015	111680	Fly Light	Sample#2189421662263312482	f		screen	Rubin	Tanya Wolff	JRC_IS04825-20150911_43_G4	Drosophila melanogaster	20x
IS04826	this paper	VT000360-p65ADZ in attP40_VT008882-ZpGdbd in attP2	20150904_48_C2	rubing_wolfft_is_screen_review	HAV5_X_0083	A01	Thu Oct 01 07:26:38 EDT 2015	110963	Fly Light	Sample#2189421647415476322	f		screen	Rubin	Tanya Wolff	JRC_IS04826-20150904_48_C2	Drosophila melanogaster	20x
IS04828	this paper	VT000360-p65ADZ in attP40_26D09-ZpGdbd in attP2	20150918_43_A6	rubing_wolfft_is_screen_review	HAV5_X_0083	A01	Thu Oct 01 16:34:55 EDT 2015	112034	Fly Light	Sample#2189559627551604834	f		screen	Rubin	Tanya Wolff	JRC_IS04828-20150918_43_A6	Drosophila melanogaster	20x
IS04829	this paper	VT000360-p65ADZ in attP40_49H12-ZpGdbd in attP2	20150904_48_E2	rubing_wolfft_is_screen_review	HAV5_X_0083	A01	Thu Oct 01 07:26:39 EDT 2015	110978	Fly Light	Sample#2189421651106463842	f		screen	Rubin	Tanya Wolff	JRC_IS04829-20150904_48_E2	Drosophila melanogaster	20x
IS04830	this paper	VT006426-p65ADZp in attP40_VT020824-ZpGdbd in attP2	20150904_47_D4	rubing_wolfft_is_screen_review	HAV5_X_0083	A01	Thu Oct 01 07:26:37 EDT 2015	110929	Fly Light	Sample#2189421644752093282	f		screen	Rubin	Tanya Wolff	JRC_IS04830-20150904_47_D4	Drosophila melanogaster	20x
IS04832	this paper	VT014206-p65ADZp in attP40_VT050384-ZpGDBD in attP2	20151016_44_B4	rubing_wolfft_is_screen_review	HAV5_X_0083	A01	Sun Nov 01 21:29:21 EST 2015	113522	Fly Light	Sample#2200882850490744906	f		screen	Rubin	Tanya Wolff	JRC_IS04832-20151016_44_B4	Drosophila melanogaster	20x
IS04832	this paper	VT014206-p65ADZp in attP40_VT050384-ZpGDBD in attP2	20210129_44_C6	rubing_wolfft_is_screen_review	UAS_Chrimson_Venus_X_0070	A01	Mon Mar 01 14:54:38 EST 2021	220544	Fly Light	Sample#2906352690189566050	f		screen	Rubin	Tanya Wolff	JRC_IS04832-20210129_44_C6	Drosophila melanogaster	20x
IS04834	this paper	VT018767-p65ADZp in attP40_VT010264-ZpGDBD in attP2	20160122_43_I4	rubing_wolfft_ss_screen_review	HAV5_X_0083	A01	Wed Feb 10 14:29:23 EST 2016	120001	Fly Light	Sample#2237378334445011042	f		screen	Rubin	Tanya Wolff	JRC_IS04834-20160122_43_I4	Drosophila melanogaster	20x
IS04835	this paper	VT018767-p65ADZp in attP40_VT013334-ZpGDbd in attP2	20150904_48_E5	rubing_wolfft_is_screen_review	HAV5_X_0083	A01	Thu Oct 01 07:26:39 EDT 2015	110981	Fly Light	Sample#2189421652482195554	f		screen	Rubin	Tanya Wolff	JRC_IS04835-20150904_48_E5	Drosophila melanogaster	20x
IS04836	this paper	VT018767-p65ADZp in attP40_VT045108-ZpGdbd in attP2	20150904_47_B4	rubing_wolfft_is_screen_review	HAV5_X_0083	A01	Thu Oct 01 07:26:30 EDT 2015	110914	Fly Light	Sample#2189421616193077346	f		screen	Rubin	Tanya Wolff	JRC_IS04836-20150904_47_B4	Drosophila melanogaster	20x
IS04836	this paper	VT018767-p65ADZp in attP40_VT045108-ZpGdbd in attP2	20151016_44_A3	rubing_wolfft_is_screen_review	HAV5_X_0083	A01	Sun Nov 01 21:29:21 EST 2015	113521	Fly Light	Sample#2200882848364232778	f		screen	Rubin	Tanya Wolff	JRC_IS04836-20151016_44_A3	Drosophila melanogaster	20x
IS04837	this paper	VT018767-p65ADZp in attP40_VT045282-ZpGdbd in attP2	20150904_47_C6	rubing_wolfft_is_screen_review	HAV5_X_0083	A01	Thu Oct 01 07:26:37 EDT 2015	110925	Fly Light	Sample#2189421643552522338	f		screen	Rubin	Tanya Wolff	JRC_IS04837-20150904_47_C6	Drosophila melanogaster	20x
IS04842	this paper	VT025526-p65ADZp in attP40_VT010264-ZpGDBD in attP2	20150911_43_F5	rubing_wolfft_is_screen_review	HAV5_X_0083	A01	Thu Oct 01 07:26:41 EDT 2015	111723	Fly Light	Sample#2189421660879192162	f		screen	Rubin	Tanya Wolff	JRC_IS04842-20150911_43_F5	Drosophila melanogaster	20x
IS04843	this paper	VT025526-p65ADZp in attP40_VT045108-ZpGdbd in attP2	20150904_48_A6	rubing_wolfft_is_screen_review	HAV5_X_0083	A01	Thu Oct 01 07:26:37 EDT 2015	110954	Fly Light	Sample#2189421642495557730	f		screen	Rubin	Tanya Wolff	JRC_IS04843-20150904_48_A6	Drosophila melanogaster	20x
IS04844	this paper	VT025526-p65ADZp in attP40_VT011146-ZpGdbd in attP2	20150911_43_F6	rubing_wolfft_is_screen_review	HAV5_X_0083	A01	Thu Oct 01 07:26:41 EDT 2015	111724	Fly Light	Sample#2189421661143433314	f		screen	Rubin	Tanya Wolff	JRC_IS04844-20150911_43_F6	Drosophila melanogaster	20x
IS04845	this paper	VT025526-p65ADZp in attP40_VT010265-ZpGdbd in attP2	20150904_48_A5	rubing_wolfft_is_screen_review	HAV5_X_0083	A01	Thu Oct 01 07:26:36 EDT 2015	110953	Fly Light	Sample#2189421641614753890	f		screen	Rubin	Tanya Wolff	JRC_IS04845-20150904_48_A5	Drosophila melanogaster	20x
IS04846	this paper	VT026329-p65ADZp in attP40_VT025526-ZpGDBD in attP2	20150904_47_G4	rubing_wolfft_is_screen_review	HAV5_X_0083	A01	Thu Oct 01 07:26:39 EDT 2015	110948	Fly Light	Sample#2189421652750631010	f		screen	Rubin	Tanya Wolff	JRC_IS04846-20150904_47_G4	Drosophila melanogaster	20x
IS04847	this paper	VT029765-p65ADZ in attP40_VT000926-ZpGDBD in attP2	20150904_47_G3	rubing_wolfft_is_screen_review	HAV5_X_0083	A01	Thu Oct 01 07:26:39 EDT 2015	110947	Fly Light	Sample#2189421652209565794	f		screen	Rubin	Tanya Wolff	JRC_IS04847-20150904_47_G3	Drosophila melanogaster	20x
IS04849	this paper	VT029765-p65ADZ in attP40_VT019073-ZpGdbd in attP2	20150904_47_G1	rubing_wolfft_is_screen_review	HAV5_X_0083	A01	Thu Oct 01 07:26:39 EDT 2015	110945	Fly Light	Sample#2189421651383287906	f		screen	Rubin	Tanya Wolff	JRC_IS04849-20150904_47_G1	Drosophila melanogaster	20x
IS04850	this paper	VT029765-p65ADZ in attP40_VT014117-ZpGdbd in attP2	20150911_43_A3	rubing_wolfft_is_screen_review	HAV5_X_0083	A01	Thu Oct 01 07:26:39 EDT 2015	111720	Fly Light	Sample#2189421653849538658	f		screen	Rubin	Tanya Wolff	JRC_IS04850-20150911_43_A3	Drosophila melanogaster	20x
IS04851	this paper	VT029765-p65ADZ in attP40_49H12-ZpGdbd in attP2	20151016_44_B2	rubing_wolfft_is_screen_review	HAV5_X_0083	A01	Sun Nov 01 21:29:21 EST 2015	113531	Fly Light	Sample#2200882849597358154	f		screen	Rubin	Tanya Wolff	JRC_IS04851-20151016_44_B2	Drosophila melanogaster	20x
IS04851	this paper	VT029765-p65ADZ in attP40_49H12-ZpGdbd in attP2	20151120_42_C4	rubing_wolfft_is_screen_review	HAV5_X_0083	A01	Fri Dec 11 11:34:00 EST 2015	116728	Fly Light	Sample#2215228536342446117	f		screen	Rubin	Tanya Wolff	JRC_IS04851-20151120_42_C4	Drosophila melanogaster	20x
IS04852	this paper	VT029765-p65ADZ in attP40_53C01-ZpGdbd in attP2	20150911_43_G6	rubing_wolfft_is_screen_review	HAV5_X_0083	A01	Thu Oct 01 07:26:41 EDT 2015	111682	Fly Light	Sample#2189421662762434658	f		screen	Rubin	Tanya Wolff	JRC_IS04852-20150911_43_G6	Drosophila melanogaster	20x
IS04855	this paper	VT014961-p65ADZp in attP40_49H12-ZpGdbd in attP2	20150911_43_D2	rubing_wolfft_is_screen_review	HAV5_X_0083	A01	Thu Oct 01 07:26:40 EDT 2015	111714	Fly Light	Sample#2189421657943179362	f		screen	Rubin	Tanya Wolff	JRC_IS04855-20150911_43_D2	Drosophila melanogaster	20x
IS04856	this paper	VT012250-p65ADZ in attP40_VT010264-ZpGDBD in attP2	20150904_47_B5	rubing_wolfft_is_screen_review	HAV5_X_0083	A01	Thu Oct 01 07:26:31 EDT 2015	110958	Fly Light	Sample#2189421621142356066	f		screen	Rubin	Tanya Wolff	JRC_IS04856-20150904_47_B5	Drosophila melanogaster	20x
IS04857	this paper	VT012250-p65ADZ in attP40_VT045108-ZpGdbd in attP2	20150904_47_F4	rubing_wolfft_is_screen_review	HAV5_X_0083	A01	Thu Oct 01 07:26:38 EDT 2015	110941	Fly Light	Sample#2189421650305351778	f		screen	Rubin	Tanya Wolff	JRC_IS04857-20150904_47_F4	Drosophila melanogaster	20x
IS04858	this paper	VT012250-p65ADZ in attP40_VT045282-ZpGdbd in attP2	20150911_43_H5	rubing_wolfft_is_screen_review	HAV5_X_0083	A01	Thu Oct 01 07:26:42 EDT 2015	111687	Fly Light	Sample#2189421663525797986	f		screen	Rubin	Tanya Wolff	JRC_IS04858-20150911_43_H5	Drosophila melanogaster	20x
IS04859	this paper	VT012250-p65ADZ in attP40_VT010265-ZpGdbd in attP2	20150904_47_C5	rubing_wolfft_is_screen_review	HAV5_X_0083	A01	Thu Oct 01 07:26:37 EDT 2015	110957	Fly Light	Sample#2189421642797547618	f		screen	Rubin	Tanya Wolff	JRC_IS04859-20150904_47_C5	Drosophila melanogaster	20x
IS04860	this paper	VT012250-p65ADZ in attP40_VT038873-ZpGdbd in attP2	20150904_47_E6	rubing_wolfft_is_screen_review	HAV5_X_0083	A01	Thu Oct 01 07:26:38 EDT 2015	110956	Fly Light	Sample#2189421648187228258	f		screen	Rubin	Tanya Wolff	JRC_IS04860-20150904_47_E6	Drosophila melanogaster	20x
IS04861	this paper	VT012250-p65ADZ in attP40_VT000360-ZpGdbd in attP2	20150904_48_B1	rubing_wolfft_is_screen_review	HAV5_X_0083	A01	Thu Oct 01 07:26:37 EDT 2015	110955	Fly Light	Sample#2189421643309252706	f		screen	Rubin	Tanya Wolff	JRC_IS04861-20150904_48_B1	Drosophila melanogaster	20x
IS04862	this paper	VT012250-p65ADZ in attP40_VT021842-ZpGDBD in attP2	20150911_43_D4	rubing_wolfft_is_screen_review	HAV5_X_0083	A01	Thu Oct 01 07:26:40 EDT 2015	111722	Fly Light	Sample#2189421658471661666	f		screen	Rubin	Tanya Wolff	JRC_IS04862-20150911_43_D4	Drosophila melanogaster	20x
IS04863	this paper	VT012250-p65ADZ in attP40_VT000767-ZpGdbd in attP2	20150904_48_A2	rubing_wolfft_is_screen_review	HAV5_X_0083	A01	Thu Oct 01 07:26:32 EDT 2015	110950	Fly Light	Sample#2189421622669082722	f		screen	Rubin	Tanya Wolff	JRC_IS04863-20150904_48_A2	Drosophila melanogaster	20x
IS04864	this paper	VT012250-p65ADZ in attP40_VT017929-ZpGDBD in attP2	20150904_48_A3	rubing_wolfft_is_screen_review	HAV5_X_0083	A01	Thu Oct 01 07:26:33 EDT 2015	110951	Fly Light	Sample#2189421628302032994	f		screen	Rubin	Tanya Wolff	JRC_IS04864-20150904_48_A3	Drosophila melanogaster	20x
IS04865	this paper	VT012250-p65ADZ in attP40_VT018767-ZpGDBD in attP2	20150904_48_A4	rubing_wolfft_is_screen_review	HAV5_X_0083	A01	Thu Oct 01 07:26:36 EDT 2015	110952	Fly Light	Sample#2189421640767504482	f		screen	Rubin	Tanya Wolff	JRC_IS04865-20150904_48_A4	Drosophila melanogaster	20x
IS04866	this paper	VT012250-p65ADZ in attP40_VT025526-ZpGDBD in attP2	20150904_47_A3	rubing_wolfft_is_screen_review	HAV5_X_0083	A01	Thu Oct 01 07:26:20 EDT 2015	110902	Fly Light	Sample#2189421571586654306	f		screen	Rubin	Tanya Wolff	JRC_IS04866-20150904_47_A3	Drosophila melanogaster	20x
IS04867	this paper	VT012250-p65ADZ in attP40_VT019749-ZpGdbd in attP2	20150911_43_H3	rubing_wolfft_is_screen_review	HAV5_X_0083	A01	Thu Oct 01 07:26:41 EDT 2015	111685	Fly Light	Sample#2189421663022481506	f		screen	Rubin	Tanya Wolff	JRC_IS04867-20150911_43_H3	Drosophila melanogaster	20x
IS04868	this paper	VT012250-p65ADZ in attP40_13D05-ZpGdbd in attP2	20150911_43_A4	rubing_wolfft_is_screen_review	HAV5_X_0083	A01	Thu Oct 01 07:26:39 EDT 2015	111721	Fly Light	Sample#2189421654122168418	f		screen	Rubin	Tanya Wolff	JRC_IS04868-20150911_43_A4	Drosophila melanogaster	20x
IS04869	this paper	VT012250-p65ADZ in attP40_14G08-ZpGdbd in attP2	20150911_43_E2	rubing_wolfft_is_screen_review	HAV5_X_0083	A01	Thu Oct 01 07:26:40 EDT 2015	111676	Fly Light	Sample#2189421658991755362	f		screen	Rubin	Tanya Wolff	JRC_IS04869-20150911_43_E2	Drosophila melanogaster	20x
IS04870	this paper	VT012250-p65ADZ in attP40_53C01-ZpGdbd in attP2	20150904_47_G2	rubing_wolfft_is_screen_review	HAV5_X_0083	A01	Thu Oct 01 07:26:39 EDT 2015	110946	Fly Light	Sample#2189421651651723362	f		screen	Rubin	Tanya Wolff	JRC_IS04870-20150904_47_G2	Drosophila melanogaster	20x
IS04871	this paper	VT013616-p65ADZp in attP40_VT010264-ZpGDBD in attP2	20150904_47_A4	rubing_wolfft_is_screen_review	HAV5_X_0083	A01	Thu Oct 01 07:26:21 EDT 2015	110903	Fly Light	Sample#2189421575751598178	f		screen	Rubin	Tanya Wolff	JRC_IS04871-20150904_47_A4	Drosophila melanogaster	20x
IS04872	this paper	VT013616-p65ADZp in attP40_VT038873-ZpGdbd in attP2	20151016_44_A6	rubing_wolfft_is_screen_review	HAV5_X_0083	A01	Sun Nov 01 21:29:21 EST 2015	113525	Fly Light	Sample#2200882849190510666	f		screen	Rubin	Tanya Wolff	JRC_IS04872-20151016_44_A6	Drosophila melanogaster	20x
IS04872	this paper	VT013616-p65ADZp in attP40_VT038873-ZpGdbd in attP2	20151030_41_A1	rubing_wolfft_is_screen_review	HAV5_X_0083	A01	Mon Nov 16 22:42:12 EST 2015	115034	Fly Light	Sample#2206337000712175714	f		screen	Rubin	Tanya Wolff	JRC_IS04872-20151030_41_A1	Drosophila melanogaster	20x
IS04872	this paper	VT013616-p65ADZp in attP40_VT038873-ZpGdbd in attP2	20151120_42_A1	rubing_wolfft_is_screen_review	HAV5_X_0083	A01	Fri Dec 11 11:33:57 EST 2015	116581	Fly Light	Sample#2215228527177891877	f		screen	Rubin	Tanya Wolff	JRC_IS04872-20151120_42_A1	Drosophila melanogaster	20x
IS04873	this paper	VT013616-p65ADZp in attP40_VT021842-ZpGDBD in attP2	20150904_47_A5	rubing_wolfft_is_screen_review	HAV5_X_0083	A01	Thu Oct 01 07:26:23 EDT 2015	110904	Fly Light	Sample#2189421586379964514	f		screen	Rubin	Tanya Wolff	JRC_IS04873-20150904_47_A5	Drosophila melanogaster	20x
IS04873	this paper	VT013616-p65ADZp in attP40_VT021842-ZpGDBD in attP2	20151120_42_B5	rubing_wolfft_is_screen_review	HAV5_X_0083	A01	Fri Dec 11 11:33:59 EST 2015	116592	Fly Light	Sample#2215228534438232101	f		screen	Rubin	Tanya Wolff	JRC_IS04873-20151120_42_B5	Drosophila melanogaster	20x
IS04875	this paper	VT013616-p65ADZp in attP40_VT019749-ZpGdbd in attP2	20150911_43_C4	rubing_wolfft_is_screen_review	HAV5_X_0083	A01	Thu Oct 01 07:26:40 EDT 2015	111710	Fly Light	Sample#2189421656882020450	f		screen	Rubin	Tanya Wolff	JRC_IS04875-20150911_43_C4	Drosophila melanogaster	20x
IS04876	this paper	VT013616-p65ADZp in attP40_VT012250-ZpGdbd in attP2	20150911_43_G5	rubing_wolfft_is_screen_review	HAV5_X_0083	A01	Thu Oct 01 07:26:41 EDT 2015	111681	Fly Light	Sample#2189421662510776418	f		screen	Rubin	Tanya Wolff	JRC_IS04876-20150911_43_G5	Drosophila melanogaster	20x
IS04877	this paper	VT013616-p65ADZp in attP40_14G08-ZpGdbd in attP2	20151016_44_B3	rubing_wolfft_is_screen_review	HAV5_X_0083	A01	Sun Nov 01 21:29:21 EST 2015	113529	Fly Light	Sample#2200882850029371466	f		screen	Rubin	Tanya Wolff	JRC_IS04877-20151016_44_B3	Drosophila melanogaster	20x
IS04878	this paper	VT014206-p65ADZp in attP40_VT014706-ZpGdbd in attP2	20150904_47_F2	rubing_wolfft_is_screen_review	HAV5_X_0083	A01	Thu Oct 01 07:26:38 EDT 2015	110939	Fly Light	Sample#2189421649244192866	f		screen	Rubin	Tanya Wolff	JRC_IS04878-20150904_47_F2	Drosophila melanogaster	20x
IS04880	this paper	VT014206-p65ADZp in attP40_VT038873-ZpGdbd in attP2	20150904_47_A2	rubing_wolfft_is_screen_review	HAV5_X_0083	A01	Thu Oct 01 07:26:18 EDT 2015	110901	Fly Light	Sample#2189421566125670498	f		screen	Rubin	Tanya Wolff	JRC_IS04880-20150904_47_A2	Drosophila melanogaster	20x
IS04881	this paper	VT014206-p65ADZp in attP40_VT000360-ZpGdbd in attP2	20150904_47_F5	rubing_wolfft_is_screen_review	HAV5_X_0083	A01	Thu Oct 01 07:26:39 EDT 2015	110942	Fly Light	Sample#2189421650838028386	f		screen	Rubin	Tanya Wolff	JRC_IS04881-20150904_47_F5	Drosophila melanogaster	20x
IS04884	this paper	VT014206-p65ADZp in attP40_VT025526-ZpGDBD in attP2	20150904_48_B4	rubing_wolfft_is_screen_review	HAV5_X_0083	A01	Thu Oct 01 07:26:37 EDT 2015	110959	Fly Light	Sample#2189421645003751522	f		screen	Rubin	Tanya Wolff	JRC_IS04884-20150904_48_B4	Drosophila melanogaster	20x
IS04885	this paper	VT014206-p65ADZp in attP40_VT006480-ZpGdbd in attP2	20150911_43_D3	rubing_wolfft_is_screen_review	HAV5_X_0083	A01	Thu Oct 01 07:26:40 EDT 2015	111715	Fly Light	Sample#2189421658203226210	f		screen	Rubin	Tanya Wolff	JRC_IS04885-20150911_43_D3	Drosophila melanogaster	20x
IS04886	this paper	VT014206-p65ADZp in attP40_VT012250-ZpGdbd in attP2	20150911_43_G3	rubing_wolfft_is_screen_review	HAV5_X_0083	A01	Thu Oct 01 07:26:41 EDT 2015	111679	Fly Light	Sample#2189421661986488418	f		screen	Rubin	Tanya Wolff	JRC_IS04886-20150911_43_G3	Drosophila melanogaster	20x
IS04891	this paper	VT042758-p65ADZ in attP40_VT012250-ZpGdbd in attP2	20150918_43_B1	rubing_wolfft_is_screen_review	HAV5_X_0083	A01	Thu Oct 01 16:34:55 EDT 2015	112035	Fly Light	Sample#2189559627870371938	f		screen	Rubin	Tanya Wolff	JRC_IS04891-20150918_43_B1	Drosophila melanogaster	20x
IS04892	this paper	VT042758-p65ADZ in attP40_VT013616-ZpGDBD in attP2	20150911_43_F2	rubing_wolfft_is_screen_review	HAV5_X_0083	A01	Thu Oct 01 07:26:41 EDT 2015	111693	Fly Light	Sample#2189421660044525666	f		screen	Rubin	Tanya Wolff	JRC_IS04892-20150911_43_F2	Drosophila melanogaster	20x
IS04893	this paper	10E07-p65ADZp in attP40; MKRS/TM6B_VT013334-ZpGDbd in attP2	20150911_43_G1	rubing_wolfft_is_screen_review	HAV5_X_0083	A01	Thu Oct 01 07:26:41 EDT 2015	111677	Fly Light	Sample#2189421661458006114	f		screen	Rubin	Tanya Wolff	JRC_IS04893-20150911_43_G1	Drosophila melanogaster	20x
IS04894	this paper	10E07-p65ADZp in attP40; MKRS/TM6B_VT019749-ZpGdbd in attP2	20150911_43_B5	rubing_wolfft_is_screen_review	HAV5_X_0083	A01	Thu Oct 01 07:26:40 EDT 2015	111705	Fly Light	Sample#2189421655502094434	f		screen	Rubin	Tanya Wolff	JRC_IS04894-20150911_43_B5	Drosophila melanogaster	20x
IS04895	this paper	10E07-p65ADZp in attP40; MKRS/TM6B_VT012250-ZpGdbd in attP2	20150911_43_C3	rubing_wolfft_is_screen_review	HAV5_X_0083	A01	Thu Oct 01 07:26:40 EDT 2015	111709	Fly Light	Sample#2189421656613584994	f		screen	Rubin	Tanya Wolff	JRC_IS04895-20150911_43_C3	Drosophila melanogaster	20x
IS04896	this paper	10E07-p65ADZp in attP40; MKRS/TM6B_14G08-ZpGdbd in attP2	20150911_43_B6	rubing_wolfft_is_screen_review	HAV5_X_0083	A01	Thu Oct 01 07:26:40 EDT 2015	111706	Fly Light	Sample#2189421655762141282	f		screen	Rubin	Tanya Wolff	JRC_IS04896-20150911_43_B6	Drosophila melanogaster	20x
IS04897	this paper	10E07-p65ADZp in attP40; MKRS/TM6B_53C01-ZpGdbd in attP2	20150911_43_G2	rubing_wolfft_is_screen_review	HAV5_X_0083	A01	Thu Oct 01 07:26:41 EDT 2015	111678	Fly Light	Sample#2189421661726441570	f		screen	Rubin	Tanya Wolff	JRC_IS04897-20150911_43_G2	Drosophila melanogaster	20x
IS04898	this paper	11B11-p65ADZp in attP40_VT038873-ZpGdbd in attP2	20150918_43_B6	rubing_wolfft_is_screen_review	HAV5_X_0083	A01	Thu Oct 01 16:34:55 EDT 2015	112040	Fly Light	Sample#2189559628491128930	f		screen	Rubin	Tanya Wolff	JRC_IS04898-20150918_43_B6	Drosophila melanogaster	20x
IS04900	this paper	18A05-p65ADZp in attP40_54B11-ZpGdbd in attP2	20150911_43_B1	rubing_wolfft_is_screen_review	HAV5_X_0083	A01	Thu Oct 01 07:26:39 EDT 2015	111701	Fly Light	Sample#2189421654667427938	f		screen	Rubin	Tanya Wolff	JRC_IS04900-20150911_43_B1	Drosophila melanogaster	20x
IS04900	this paper	18A05-p65ADZp in attP40_54B11-ZpGdbd in attP2	20210219_48_E2	rubing_wolfft_is_screen_review	UAS_Chrimson_Venus_X_0070	A01	Tue Mar 16 13:11:10 EDT 2021	221838	Fly Light	Sample#2911747367583613026	f		screen	Rubin	Tanya Wolff	JRC_IS04900-20210219_48_E2	Drosophila melanogaster	20x
IS04901	this paper	20A03-p65ADZp in attP40_VT013875-ZpGDBD in attP2	20150911_43_F1	rubing_wolfft_is_screen_review	HAV5_X_0083	A01	Thu Oct 01 07:26:41 EDT 2015	111692	Fly Light	Sample#2189421659780284514	f		screen	Rubin	Tanya Wolff	JRC_IS04901-20150911_43_F1	Drosophila melanogaster	20x
IS04902	this paper	w; 22E10-p65ADZp; MKRS/TM6B_49C12-ZpGdbd in attP2	20150911_43_F3	rubing_wolfft_is_screen_review	HAV5_X_0083	A01	Thu Oct 01 07:26:41 EDT 2015	111694	Fly Light	Sample#2189421660300378210	f		screen	Rubin	Tanya Wolff	JRC_IS04902-20150911_43_F3	Drosophila melanogaster	20x
IS04903	this paper	22G02-p65ADZp in attP40_VT013531-ZpGdbd in attP2	20150911_43_E6	rubing_wolfft_is_screen_review	HAV5_X_0083	A01	Thu Oct 01 07:26:41 EDT 2015	111691	Fly Light	Sample#2189421659520237666	f		screen	Rubin	Tanya Wolff	JRC_IS04903-20150911_43_E6	Drosophila melanogaster	20x
IS04904	this paper	w; 31A10-p65ADZp; MKRS/ TM6B_49H12-ZpGdbd in attP2	20150911_43_C5	rubing_wolfft_is_screen_review	HAV5_X_0083	A01	Thu Oct 01 07:26:40 EDT 2015	111711	Fly Light	Sample#2189421657150455906	f		screen	Rubin	Tanya Wolff	JRC_IS04904-20150911_43_C5	Drosophila melanogaster	20x
IS04905	this paper	32A11-p65ADZp in attP40_49A11-ZpGdbd in attP2	20151016_44_A1	rubing_wolfft_is_screen_review	HAV5_X_0083	A01	Sun Nov 01 21:29:21 EST 2015	113530	Fly Light	Sample#2200882846975918154	f		screen	Rubin	Tanya Wolff	JRC_IS04905-20151016_44_A1	Drosophila melanogaster	20x
IS04905	this paper	32A11-p65ADZp in attP40_49A11-ZpGdbd in attP2	20151120_42_A6	rubing_wolfft_is_screen_review	HAV5_X_0083	A01	Fri Dec 11 11:33:59 EST 2015	116587	Fly Light	Sample#2215228533305770021	f		screen	Rubin	Tanya Wolff	JRC_IS04905-20151120_42_A6	Drosophila melanogaster	20x
IS04906	this paper	32A11-p65ADZp in attP40_75B09-ZpGdbd in attP2	20150911_43_H6	rubing_wolfft_is_screen_review	HAV5_X_0083	A01	Thu Oct 01 07:26:42 EDT 2015	111689	Fly Light	Sample#2189421663811010658	f		screen	Rubin	Tanya Wolff	JRC_IS04906-20150911_43_H6	Drosophila melanogaster	20x
IS04908	this paper	38D03-p65ADZp in attP40_VT014117-ZpGdbd in attP2	20150911_43_B3	rubing_wolfft_is_screen_review	HAV5_X_0083	A01	Thu Oct 01 07:26:40 EDT 2015	111703	Fly Light	Sample#2189421654940057698	f		screen	Rubin	Tanya Wolff	JRC_IS04908-20150911_43_B3	Drosophila melanogaster	20x
IS04909	this paper	41G11-p65ADZp in attP40_VT016795-ZpGdbd in attP2	20150911_43_E5	rubing_wolfft_is_screen_review	HAV5_X_0083	A01	Thu Oct 01 07:26:41 EDT 2015	111698	Fly Light	Sample#2189421659260190818	f		screen	Rubin	Tanya Wolff	JRC_IS04909-20150911_43_E5	Drosophila melanogaster	20x
IS04910	this paper	41G11-p65ADZp in attP40_VT004422-ZpGdbd in attP2	20150925_41_A6	rubing_wolfft_is_screen_review	HAV5_X_0083	A01	Mon Oct 12 16:48:09 EDT 2015	112616	Fly Light	Sample#2193549224983920738	f		screen	Rubin	Tanya Wolff	JRC_IS04910-20150925_41_A6	Drosophila melanogaster	20x
IS04912	this paper	41G11-p65ADZp in attP40_72G09-ZpGdbd in attP2	20150918_43_A5	rubing_wolfft_is_screen_review	HAV5_X_0083	A01	Thu Oct 01 16:34:55 EDT 2015	112042	Fly Light	Sample#2189559627241226338	f		screen	Rubin	Tanya Wolff	JRC_IS04912-20150918_43_A5	Drosophila melanogaster	20x
IS04913	this paper	42G10-p65ADZp in attP40_VT017375-ZpGDBD in attP2	20150918_43_B3	rubing_wolfft_is_screen_review	HAV5_X_0083	A01	Thu Oct 01 16:34:55 EDT 2015	112037	Fly Light	Sample#2189559628180750434	f		screen	Rubin	Tanya Wolff	JRC_IS04913-20150918_43_B3	Drosophila melanogaster	20x
IS04914	this paper	47F07-p65ADZp in attP40; MKRS/TM6B_VT010264-ZpGDBD in attP2	20150911_43_C2	rubing_wolfft_is_screen_review	HAV5_X_0083	A01	Thu Oct 01 07:26:40 EDT 2015	111708	Fly Light	Sample#2189421656328372322	f		screen	Rubin	Tanya Wolff	JRC_IS04914-20150911_43_C2	Drosophila melanogaster	20x
IS04915	this paper	47F07-p65ADZp in attP40; MKRS/TM6B_VT000775-ZpGdbd in attP2	20150911_43_B4	rubing_wolfft_is_screen_review	HAV5_X_0083	A01	Thu Oct 01 07:26:40 EDT 2015	111704	Fly Light	Sample#2189421655212687458	f		screen	Rubin	Tanya Wolff	JRC_IS04915-20150911_43_B4	Drosophila melanogaster	20x
IS04916	this paper	50H07-p65ADZp in attP40; MKRS/TM6B_VT013334-ZpGDbd in attP2	20150911_43_C6	rubing_wolfft_is_screen_review	HAV5_X_0083	A01	Thu Oct 01 07:26:40 EDT 2015	111712	Fly Light	Sample#2189421657414697058	f		screen	Rubin	Tanya Wolff	JRC_IS04916-20150911_43_C6	Drosophila melanogaster	20x
IS04919	this paper	VT010661-p65ADZp in attP40_VT010063-ZpGDBD in attP2	20210219_42_B2	nerna_is_screen_review	UAS_Chrimson_Venus_X_0070	A01	Wed Mar 10 13:02:40 EST 2021	221994	Fly Light	Sample#2909586000843898978	f		screen	Rubin	Aljoscha Nern	JRC_IS04919-20210219_42_B2	Drosophila melanogaster	20x
IS04919	this paper	VT010661-p65ADZp in attP40_VT010063-ZpGDBD in attP2	20150911_43_A6	rubing_wolfft_is_screen_review	HAV5_X_0083	A01	Thu Oct 01 07:26:39 EDT 2015	111700	Fly Light	Sample#2189421654390603874	f		screen	Rubin	Tanya Wolff	JRC_IS04919-20150911_43_A6	Drosophila melanogaster	20x
IS04931	this paper	VT029765-p65ADZ in attP40_VT000775-ZpGdbd in attP2	20151120_42_B4	rubing_wolfft_is_screen_review	HAV5_X_0083	A01	Fri Dec 11 11:33:59 EST 2015	116591	Fly Light	Sample#2215228534115270693	f		screen	Rubin	Tanya Wolff	JRC_IS04931-20151120_42_B4	Drosophila melanogaster	20x
IS04936	this paper	22G02-p65ADZp in attP40_42G10-ZpGdbd in attP2	20151030_41_A4	rubing_wolfft_is_screen_review	HAV5_X_0083	A01	Mon Nov 16 22:42:12 EST 2015	115037	Fly Light	Sample#2206337001022554210	f		screen	Rubin	Tanya Wolff	JRC_IS04936-20151030_41_A4	Drosophila melanogaster	20x
IS04937	this paper	47F07-p65ADZp in attP40; MKRS/TM6B_VT021842-ZpGDBD in attP2	20150925_41_A2	rubing_wolfft_is_screen_review	HAV5_X_0083	A01	Mon Oct 12 16:48:09 EDT 2015	112610	Fly Light	Sample#2193549224635793506	f		screen	Rubin	Tanya Wolff	JRC_IS04937-20150925_41_A2	Drosophila melanogaster	20x
IS04938	this paper	49H12-p65ADZp in attP40_HAV5; CyO/Sco; 15B07-ZpGDBD in attP2	20151120_42_B6	rubing_wolfft_is_screen_review	HAV5_X_0083	A01	Fri Dec 11 11:33:59 EST 2015	116593	Fly Light	Sample#2215228534824108069	f		screen	Rubin	Tanya Wolff	JRC_IS04938-20151120_42_B6	Drosophila melanogaster	20x
IS04939	this paper	49H12-p65ADZp in attP40_27A07-ZpGdbd in attP2	20151120_42_C2	rubing_wolfft_is_screen_review	HAV5_X_0083	A01	Fri Dec 11 11:33:59 EST 2015	116729	Fly Light	Sample#2215228535281287205	f		screen	Rubin	Tanya Wolff	JRC_IS04939-20151120_42_C2	Drosophila melanogaster	20x
IS04941	this paper	73B05-p65ADZp in attP40; MKRS/TM6B_VT010264-ZpGDBD in attP2	20160122_43_I5	rubing_wolfft_ss_screen_review	HAV5_X_0083	A01	Wed Feb 10 14:29:23 EST 2016	120002	Fly Light	Sample#2237378334772166754	f		screen	Rubin	Tanya Wolff	JRC_IS04941-20160122_43_I5	Drosophila melanogaster	20x
IS04942	this paper	73B05-p65ADZp in attP40; MKRS/TM6B_VT013334-ZpGDbd in attP2	20150925_41_A1	rubing_wolfft_is_screen_review	HAV5_X_0083	A01	Mon Oct 12 16:48:09 EDT 2015	112609	Fly Light	Sample#2193549224275083362	f		screen	Rubin	Tanya Wolff	JRC_IS04942-20150925_41_A1	Drosophila melanogaster	20x
IS04943	this paper	73B05-p65ADZp in attP40; MKRS/TM6B_VT045282-ZpGdbd in attP2	20151030_41_A5	rubing_wolfft_is_screen_review	HAV5_X_0083	A01	Mon Nov 16 22:42:12 EST 2015	115038	Fly Light	Sample#2206337001341321314	f		screen	Rubin	Tanya Wolff	JRC_IS04943-20151030_41_A5	Drosophila melanogaster	20x
IS04943	this paper	73B05-p65ADZp in attP40; MKRS/TM6B_VT045282-ZpGdbd in attP2	20151120_42_A4	rubing_wolfft_is_screen_review	HAV5_X_0083	A01	Fri Dec 11 11:33:58 EST 2015	116584	Fly Light	Sample#2215228527983198245	f		screen	Rubin	Tanya Wolff	JRC_IS04943-20151120_42_A4	Drosophila melanogaster	20x
IS04944	this paper	75B10-p65ADZp in attP40_72G09-ZpGdbd in attP2	20151030_41_A6	rubing_wolfft_is_screen_review	HAV5_X_0083	A01	Mon Nov 16 22:42:12 EST 2015	115039	Fly Light	Sample#2206337001643311202	f		screen	Rubin	Tanya Wolff	JRC_IS04944-20151030_41_A6	Drosophila melanogaster	20x
IS04965	this paper	54G12-p65ADZp in attP40; MKRS/TM6B_HAV5; CyO/Sco; 44D05-ZpGDBD in attP2	20150918_52_C5	rubing_dolanm_is_screen_review	UAS_Chrimson_Venus_X_0070	A01	Fri Oct 02 15:22:48 EDT 2015	112418	Fly Light	Sample#2189903868559622242	f		screen	Terra Incognita	Michael-John Dolan	JRC_IS04965-20150918_52_C5	Drosophila melanogaster	20x
IS05012	this paper	VT017422-p65ADZp in attP40_22E12-ZpGdbd in attP2	20170310_52_E5	goldammerj_is_screen_review	UAS_Chrimson_Venus_X_0070	A	Thu Mar 30 17:34:44 EDT 2017	147727	Fly Light	Sample#2387438457212371042	f		screen	Terra Incognita	Jens Goldammer	JRC_IS05012-20170310_52_E5	Drosophila melanogaster	20x
IS05021	this paper	VT042863-p65ADZp in attP40_VT042863-ZpGdbd in attP2	20210618_43_A6	schretterc_is_screen_review	UAS_Chrimson_Venus_X_0070	A01	Fri Jul 02 09:40:36 EDT 2021	230459	Fly Light	Sample#2950832270014939234	f		screen	Rubin	Katie Schretter	JRC_IS05021-20210618_43_A6	Drosophila melanogaster	20x
IS05069	this paper	82E12-p65ADZp in attP40_70B08-ZpGdbd in attP2	20160617_52_J5	goldammerj_is_screen_review	UAS_Chrimson_Venus_X_0070	A00	Thu Jul 14 09:19:12 EDT 2016	129181	Fly Light	Sample#2293455293784260645	f		screen	Terra Incognita	Jens Goldammer	JRC_IS05069-20160617_52_J5	Drosophila melanogaster	20x
IS05072	this paper	w; 84E05-p65ADZ; MKRS/TM6B_HAV5; CyO/Sp; 82F01-ZpGDBD in attP2	20160805_51_D5	goldammerj_is_screen_review	UAS_Chrimson_Venus_X_0070	A00	Mon Aug 29 09:13:34 EDT 2016	132789	Fly Light	Sample#2310123719390920849	f		screen	Terra Incognita	Jens Goldammer	JRC_IS05072-20160805_51_D5	Drosophila melanogaster	20x
IS05083	this paper	47B03-p65ADZp in attP40_34E09-ZpGdbd in attP2	20150904_52_D1	rubing_dolanm_is_screen_review	HAV5_X_0083	A01	Mon Sep 21 14:17:00 EDT 2015	110997	Fly Light	Sample#2185901041919197282	f		screen	Terra Incognita	Michael-John Dolan	JRC_IS05083-20150904_52_D1	Drosophila melanogaster	20x
IS05084	this paper	w; 14E05-p65ADZp in attP40_HAV5; CyO/Sco; 14B11-ZpGDBD in attP2	20150904_52_A1	rubing_dolanm_is_screen_review	HAV5_X_0083	A01	Mon Sep 21 14:16:59 EDT 2015	110987	Fly Light	Sample#2185901037083164770	f		screen	Terra Incognita	Michael-John Dolan	JRC_IS05084-20150904_52_A1	Drosophila melanogaster	20x
IS05086	this paper	w; 28A10-p65ADZp; MKRS/ TM6B_20A03-ZpGdbd in attP2	20150904_52_B1	rubing_dolanm_is_screen_review	HAV5_X_0083	A01	Mon Sep 21 14:17:00 EDT 2015	110990	Fly Light	Sample#2185901040031760482	f		screen	Terra Incognita	Michael-John Dolan	JRC_IS05086-20150904_52_B1	Drosophila melanogaster	20x
IS05087	this paper	45D07-p65ADZp in attP40/ CyO_59C10-ZpGdbd in attP2	20150904_44_D1	ditp_is_screen_review	HAV5_X_0083	A01	Fri Sep 25 09:39:08 EDT 2015	109545	Fly Light	Sample#2187280665844645986	f		screen	Descending Interneuron	Shigehiro Namiki	JRC_IS05087-20150904_44_D1	Drosophila melanogaster	20x
IS05089	this paper	VT042835-p65ADZ in attP40_65C10-ZpGdbd in attP2	20150904_44_G6	ditp_is_screen_review	HAV5_X_0083	A01	Fri Sep 25 09:39:08 EDT 2015	109516	Fly Light	Sample#2187280667669168226	f		screen	Descending Interneuron	Shigehiro Namiki	JRC_IS05089-20150904_44_G6	Drosophila melanogaster	20x
IS05094	this paper	18H04-p65ADZp in attP40_VT025789-ZpGdbd in attP2	20150904_44_A6	ditp_is_screen_review	HAV5_X_0083	A01	Fri Sep 25 09:39:08 EDT 2015	109537	Fly Light	Sample#2187280664070455394	f		screen	Descending Interneuron	Shigehiro Namiki	JRC_IS05094-20150904_44_A6	Drosophila melanogaster	20x
IS05098	this paper	42B02-p65ADZp in attP40; MKRS/TM6B_VT043924-ZpGDBD in attP2	20150904_44_F6	ditp_is_screen_review	HAV5_X_0083	A01	Fri Sep 25 09:39:08 EDT 2015	109543	Fly Light	Sample#2187280666884833378	f		screen	Descending Interneuron	Shigehiro Namiki	JRC_IS05098-20150904_44_F6	Drosophila melanogaster	20x
IS05099	this paper	44A07-p65ADZp in attP40_VT062604-ZpGdbd in attP2	20150904_44_F2	ditp_is_screen_review	HAV5_X_0083	A01	Fri Sep 25 09:39:08 EDT 2015	109544	Fly Light	Sample#2187280666628980834	f		screen	Descending Interneuron	Shigehiro Namiki	JRC_IS05099-20150904_44_F2	Drosophila melanogaster	20x
IS05101	this paper	VT014712-p65ADZp in attP40_VT042835-ZpGdbd in attP2	20150904_44_C1	ditp_is_screen_review	HAV5_X_0083	A01	Fri Sep 25 09:39:08 EDT 2015	109505	Fly Light	Sample#2187280664854790242	f		screen	Descending Interneuron	Shigehiro Namiki	JRC_IS05101-20150904_44_C1	Drosophila melanogaster	20x
IS05106	this paper	VT023750-p65ADZp in attP40_VT043924-ZpGDBD in attP2	20150904_44_A1	ditp_is_screen_review	HAV5_X_0083	A01	Fri Sep 25 09:39:07 EDT 2015	109510	Fly Light	Sample#2187280660941504610	f		screen	Descending Interneuron	Shigehiro Namiki	JRC_IS05106-20150904_44_A1	Drosophila melanogaster	20x
IS05107	this paper	VT023750-p65ADZp in attP40_VT042835-ZpGdbd in attP2	20150904_44_C2	ditp_is_screen_review	HAV5_X_0083	A01	Fri Sep 25 09:39:08 EDT 2015	109511	Fly Light	Sample#2187280665232277602	f		screen	Descending Interneuron	Shigehiro Namiki	JRC_IS05107-20150904_44_C2	Drosophila melanogaster	20x
IS05108	this paper	VT039465-p65ADZ in attP40_VT043924-ZpGDBD in attP2	20150904_44_A2	ditp_is_screen_review	HAV5_X_0083	A01	Fri Sep 25 09:39:07 EDT 2015	109512	Fly Light	Sample#2187280663525195874	f		screen	Descending Interneuron	Shigehiro Namiki	JRC_IS05108-20150904_44_A2	Drosophila melanogaster	20x
IS05110	this paper	VT043162-p65ADZp in attP40_VT042835-ZpGdbd in attP2	20150904_44_B3	ditp_is_screen_review	HAV5_X_0083	A01	Fri Sep 25 09:39:08 EDT 2015	109514	Fly Light	Sample#2187280664334696546	f		screen	Descending Interneuron	Shigehiro Namiki	JRC_IS05110-20150904_44_B3	Drosophila melanogaster	20x
IS05113	this paper	VT042835-p65ADZ in attP40_VT014712-ZpGDBD in attP2	20150904_44_H1	ditp_is_screen_review	HAV5_X_0083	A01	Fri Sep 25 09:39:08 EDT 2015	109528	Fly Light	Sample#2187280667941797986	f		screen	Descending Interneuron	Shigehiro Namiki	JRC_IS05113-20150904_44_H1	Drosophila melanogaster	20x
IS05116	this paper	VT042835-p65ADZ in attP40_VT023750-ZpGdbd in attP2	20150904_44_D3	ditp_is_screen_review	HAV5_X_0083	A01	Fri Sep 25 09:39:08 EDT 2015	109521	Fly Light	Sample#2187280666096304226	f		screen	Descending Interneuron	Shigehiro Namiki	JRC_IS05116-20150904_44_D3	Drosophila melanogaster	20x
IS05117	this paper	VT042835-p65ADZ in attP40_VT043162-ZpGdbd in attP2	20150904_44_H5	ditp_is_screen_review	HAV5_X_0083	A01	Fri Sep 25 09:39:09 EDT 2015	109522	Fly Light	Sample#2187280668717744226	f		screen	Descending Interneuron	Shigehiro Namiki	JRC_IS05117-20150904_44_H5	Drosophila melanogaster	20x
IS05120	this paper	VT042835-p65ADZ in attP40_VT041041-ZpGdbd in attP2	20150904_44_H2	ditp_is_screen_review	HAV5_X_0083	A01	Fri Sep 25 09:39:09 EDT 2015	109517	Fly Light	Sample#2187280668193456226	f		screen	Descending Interneuron	Shigehiro Namiki	JRC_IS05120-20150904_44_H2	Drosophila melanogaster	20x
IS05121	this paper	VT042835-p65ADZ in attP40_VT058697-ZpGDBD in attP2	20150904_44_H6	ditp_is_screen_review	HAV5_X_0083	A01	Fri Sep 25 09:39:09 EDT 2015	109527	Fly Light	Sample#2187280668981985378	f		screen	Descending Interneuron	Shigehiro Namiki	JRC_IS05121-20150904_44_H6	Drosophila melanogaster	20x
IS05122	this paper	VT042835-p65ADZ in attP40_VT020379-ZpGDBD in attP2	20150904_44_G5	ditp_is_screen_review	HAV5_X_0083	A01	Fri Sep 25 09:39:08 EDT 2015	109525	Fly Light	Sample#2187280667396538466	f		screen	Descending Interneuron	Shigehiro Namiki	JRC_IS05122-20150904_44_G5	Drosophila melanogaster	20x
IS05123	this paper	VT042835-p65ADZ in attP40_VT040353-ZpGdbd in attP2	20150904_44_H4	ditp_is_screen_review	HAV5_X_0083	A01	Fri Sep 25 09:39:09 EDT 2015	109529	Fly Light	Sample#2187280668466085986	f		screen	Descending Interneuron	Shigehiro Namiki	JRC_IS05123-20150904_44_H4	Drosophila melanogaster	20x
IS05127	this paper	VT020379-p65ADZp in attP40_VT043924-ZpGDBD in attP2	20150904_44_A3	ditp_is_screen_review	HAV5_X_0083	A01	Fri Sep 25 09:39:07 EDT 2015	109534	Fly Light	Sample#2187280663789437026	f		screen	Descending Interneuron	Shigehiro Namiki	JRC_IS05127-20150904_44_A3	Drosophila melanogaster	20x
IS05128	this paper	VT040353-p65ADZp in attP40_VT042835-ZpGdbd in attP2	20150904_44_C3	ditp_is_screen_review	HAV5_X_0083	A01	Fri Sep 25 09:39:08 EDT 2015	109535	Fly Light	Sample#2187280665592987746	f		screen	Descending Interneuron	Shigehiro Namiki	JRC_IS05128-20150904_44_C3	Drosophila melanogaster	20x
IS05129	this paper	24F06-p65ADZp in attP40; MKRS/TM6B_VT062604-ZpGdbd in attP2	20150904_44_G1	ditp_is_screen_review	HAV5_X_0083	A01	Fri Sep 25 09:39:08 EDT 2015	109541	Fly Light	Sample#2187280667144880226	f		screen	Descending Interneuron	Shigehiro Namiki	JRC_IS05129-20150904_44_G1	Drosophila melanogaster	20x
IS05135	this paper	VT041041-p65ADZp in attP40_VT042835-ZpGdbd in attP2	20150904_44_B4	ditp_is_screen_review	HAV5_X_0083	A01	Fri Sep 25 09:39:08 EDT 2015	109551	Fly Light	Sample#2187280664598937698	f		screen	Descending Interneuron	Shigehiro Namiki	JRC_IS05135-20150904_44_B4	Drosophila melanogaster	20x
IS05136	this paper	VT020379-p65ADZp in attP40_VT042835-ZpGdbd in attP2	20150904_44_D6	ditp_is_screen_review	HAV5_X_0083	A01	Fri Sep 25 09:39:08 EDT 2015	109552	Fly Light	Sample#2187280666373128290	f		screen	Descending Interneuron	Shigehiro Namiki	JRC_IS05136-20150904_44_D6	Drosophila melanogaster	20x
IS05139	this paper	w; 13D05-p65ADZp/ MKRS/TM6B_92D05-ZpGdbd in attP2	20150904_42_E1	nerna_is_screen_review	HAV5_X_0083	A01	Tue Sep 22 13:00:16 EDT 2015	109482	Fly Light	Sample#2186244120706547810	f		screen	Rubin	Aljoscha Nern	JRC_IS05139-20150904_42_E1	Drosophila melanogaster	20x
IS05141	this paper	14E09-p65ADZp in attP40; MKRS/TM6B_52B07-ZpGdbd in attP2	20150904_42_B4	nerna_is_screen_review	HAV5_X_0083	A01	Tue Sep 22 13:00:16 EDT 2015	109484	Fly Light	Sample#2186244119246930018	f		screen	Rubin	Aljoscha Nern	JRC_IS05141-20150904_42_B4	Drosophila melanogaster	20x
IS05150	this paper	24C04-p65ADZp in attP40_52B07-ZpGdbd in attP2	20150904_43_A6	nerna_is_screen_review	HAV5_X_0083	A01	Wed Sep 23 12:07:57 EDT 2015	109498	Fly Light	Sample#2186593339988508770	f		screen	Rubin	Aljoscha Nern	JRC_IS05150-20150904_43_A6	Drosophila melanogaster	20x
IS05153	this paper	26E12-p65ADZp in attP40_78H05-ZpGdbd in attP2	20150904_43_D6	nerna_is_screen_review	HAV5_X_0083	A01	Wed Sep 23 12:07:57 EDT 2015	109502	Fly Light	Sample#2186593340647014498	f		screen	Rubin	Aljoscha Nern	JRC_IS05153-20150904_43_D6	Drosophila melanogaster	20x
IS05157	this paper	VT008462-p65ADZp in attP40_31D07-ZpGDBD in attP2	20150904_42_C1	nerna_is_screen_review	HAV5_X_0083	A01	Tue Sep 22 13:00:16 EDT 2015	109433	Fly Light	Sample#2186244119842521186	f		screen	Rubin	Aljoscha Nern	JRC_IS05157-20150904_42_C1	Drosophila melanogaster	20x
IS05160	this paper	VT027001-p65ADZp in attP40_37E06-ZpGdbd in attP2	20170224_45_B2	nerna_is_screen_review	UAS_Chrimson_Venus_X_0070	A01	Wed Mar 29 16:26:39 EDT 2017	145736	Fly Light	Sample#2387058934893510754	f		screen	Rubin	Aljoscha Nern	JRC_IS05160-20170224_45_B2	Drosophila melanogaster	20x
IS05169	this paper	VT014724-p65ADZp in attP40_70F05-ZpGdbd in attP2	20150904_42_B5	nerna_is_screen_review	HAV5_X_0083	A01	Tue Sep 22 13:00:16 EDT 2015	109446	Fly Light	Sample#2186244119548919906	f		screen	Rubin	Aljoscha Nern	JRC_IS05169-20150904_42_B5	Drosophila melanogaster	20x
IS05178	this paper	VT033646-p65ADZp in attP40_79H02-ZpGdbd in attP2	20150904_42_D4	nerna_is_screen_review	HAV5_X_0083	A01	Tue Sep 22 13:00:16 EDT 2015	109455	Fly Light	Sample#2186244120421335138	f		screen	Rubin	Aljoscha Nern	JRC_IS05178-20150904_42_D4	Drosophila melanogaster	20x
IS05183	this paper	VT024647-p65ADZp in attP40_22G07-ZpGdbd in attP2	20190517_42_F1	minegishir_is_screen_review	UAS_Chrimson_Venus_X_0070	A01	Wed Jun 12 14:12:02 EDT 2019	191833	Fly Light	Sample#2678747288280498274	m		screen	Dickson	Ryo Minegishi	JRC_IS05183-20190517_42_F1	Drosophila melanogaster	20x
IS05183	this paper	VT024647-p65ADZp in attP40_22G07-ZpGdbd in attP2	20150904_43_C3	nerna_is_screen_review	HAV5_X_0083	A01	Wed Sep 23 12:07:57 EDT 2015	109460	Fly Light	Sample#2186593340378579042	f		screen	Rubin	Aljoscha Nern	JRC_IS05183-20150904_43_C3	Drosophila melanogaster	20x
IS05188	this paper	VT029799-p65ADZ in attP40_78H05-ZpGdbd in attP2	20150904_43_F1	nerna_is_screen_review	HAV5_X_0083	A01	Wed Sep 23 12:07:58 EDT 2015	109467	Fly Light	Sample#2186593346258993250	f		screen	Rubin	Aljoscha Nern	JRC_IS05188-20150904_43_F1	Drosophila melanogaster	20x
IS05192	this paper	VT008686-p65ADZp in attP40_22G07-ZpGdbd in attP2	20150904_43_F6	nerna_is_screen_review	HAV5_X_0083	A01	Wed Sep 23 12:07:58 EDT 2015	109472	Fly Light	Sample#2186593346544205922	f		screen	Rubin	Aljoscha Nern	JRC_IS05192-20150904_43_F6	Drosophila melanogaster	20x
IS05201	this paper	23H11-p65ADZp in attP40_VT026000-ZpGDBD in attP2	20150904_43_E3	nerna_is_screen_review	HAV5_X_0083	A01	Wed Sep 23 12:07:57 EDT 2015	109492	Fly Light	Sample#2186593341225828450	f		screen	Rubin	Aljoscha Nern	JRC_IS05201-20150904_43_E3	Drosophila melanogaster	20x
IS05202	this paper	23H11-p65ADZp in attP40_VT025999-ZpGDBD in attP2	20150904_43_E4	nerna_is_screen_review	HAV5_X_0083	A01	Wed Sep 23 12:07:58 EDT 2015	109493	Fly Light	Sample#2186593345680179298	f		screen	Rubin	Aljoscha Nern	JRC_IS05202-20150904_43_E4	Drosophila melanogaster	20x
IS05204	this paper	26E12-p65ADZp in attP40_VT048842-ZpGDBD in attP2	20150904_42_B2	nerna_is_screen_review	HAV5_X_0083	A01	Tue Sep 22 13:00:16 EDT 2015	109501	Fly Light	Sample#2186244118961717346	f		screen	Rubin	Aljoscha Nern	JRC_IS05204-20150904_42_B2	Drosophila melanogaster	20x
IS05205	this paper	VT008974-p65ADZp in attP40_VT048842-ZpGDBD in attP2	20150904_42_A5	nerna_is_screen_review	HAV5_X_0083	A01	Tue Sep 22 13:00:16 EDT 2015	109428	Fly Light	Sample#2186244118307405922	f		screen	Rubin	Aljoscha Nern	JRC_IS05205-20150904_42_A5	Drosophila melanogaster	20x
IS05206	this paper	VT008462-p65ADZp in attP40_VT040048-ZpGDBD in attP2	20150904_42_C3	nerna_is_screen_review	HAV5_X_0083	A01	Tue Sep 22 13:00:16 EDT 2015	109432	Fly Light	Sample#2186244120136122466	f		screen	Rubin	Aljoscha Nern	JRC_IS05206-20150904_42_C3	Drosophila melanogaster	20x
IS05207	this paper	VT025526-p65ADZp in attP40_VT055855-ZpGdbd in attP2	20150904_43_E5	nerna_is_screen_review	HAV5_X_0083	A01	Wed Sep 23 12:07:58 EDT 2015	109462	Fly Light	Sample#2186593345982173282	f		screen	Rubin	Aljoscha Nern	JRC_IS05207-20150904_43_E5	Drosophila melanogaster	20x
IS05208	this paper	VT029799-p65ADZ in attP40_VT048842-ZpGDBD in attP2	20150904_42_A6	nerna_is_screen_review	HAV5_X_0083	A01	Tue Sep 22 13:00:16 EDT 2015	109466	Fly Light	Sample#2186244118672310370	f		screen	Rubin	Aljoscha Nern	JRC_IS05208-20150904_42_A6	Drosophila melanogaster	20x
IS05212	this paper	23H11-p65ADZp in attP40_VT058734-ZpGDBD in attP2	20150904_43_E1	nerna_is_screen_review	HAV5_X_0083	A01	Wed Sep 23 12:07:57 EDT 2015	109491	Fly Light	Sample#2186593340940615778	f		screen	Rubin	Aljoscha Nern	JRC_IS05212-20150904_43_E1	Drosophila melanogaster	20x
IS05213	this paper	31D07-p65ADZp in attP40_83D05-ZpGdbd in attP2	20150911_41_D3	nerna_is_screen_review	HAV5_X_0083	A01	Mon Sep 28 16:10:37 EDT 2015	111292	Fly Light	Sample#2188466350098219106	f		screen	Rubin	Aljoscha Nern	JRC_IS05213-20150911_41_D3	Drosophila melanogaster	20x
IS05214	this paper	42E06-p65ADZp in attP40_37E06-ZpGdbd in attP2	20161104_54_C2	sterneg_is_screen_review	UAS_Chrimson_Venus_X_0070	A00	Thu Dec 01 13:27:57 EST 2016	138134	Fly Light	Sample#2344267296790282385	f		screen	Terra Incognita	Gabriella Sterne	JRC_IS05214-20161104_54_C2	Drosophila melanogaster	20x
IS05216	this paper	47H01-p65ADZp in attP40_26E12-ZpGdbd in attP2	20150911_41_E3	nerna_is_screen_review	HAV5_X_0083	A01	Mon Sep 28 16:10:37 EDT 2015	111301	Fly Light	Sample#2188466350945468514	f		screen	Rubin	Aljoscha Nern	JRC_IS05216-20150911_41_E3	Drosophila melanogaster	20x
IS05217	this paper	47H01-p65ADZp in attP40_54B12-ZpGdbd in attP2	20150911_41_I5	nerna_is_screen_review	HAV5_X_0083	A01	Mon Sep 28 16:10:38 EDT 2015	111302	Fly Light	Sample#2188466353453662306	f		screen	Rubin	Aljoscha Nern	JRC_IS05217-20150911_41_I5	Drosophila melanogaster	20x
IS05218	this paper	48F07-p65ADZp in attP40; MKRS/TM6B_92C07-ZpGdbd in attP2	20150911_41_D5	nerna_is_screen_review	HAV5_X_0083	A01	Mon Sep 28 16:10:37 EDT 2015	111304	Fly Light	Sample#2188466350370848866	f		screen	Rubin	Aljoscha Nern	JRC_IS05218-20150911_41_D5	Drosophila melanogaster	20x
IS05223	this paper	54B12-p65ADZp in attP40_14E09-ZpGdbd in attP2	20150911_41_B2	nerna_is_screen_review	HAV5_X_0083	A01	Mon Sep 28 16:10:36 EDT 2015	111322	Fly Light	Sample#2188466347535499362	f		screen	Rubin	Aljoscha Nern	JRC_IS05223-20150911_41_B2	Drosophila melanogaster	20x
IS05224	this paper	54B12-p65ADZp in attP40_20G12-ZpGdbd in attP2	20150911_42_E1	nerna_is_screen_review	HAV5_X_0083	A01	Thu Oct 01 07:32:41 EDT 2015	111323	Fly Light	Sample#2189423172753817698	f		screen	Rubin	Aljoscha Nern	JRC_IS05224-20150911_42_E1	Drosophila melanogaster	20x
IS05226	this paper	54B12-p65ADZp in attP40_42E06-ZpGdbd in attP2/ TM3	20150911_42_E5	nerna_is_screen_review	HAV5_X_0083	A01	Thu Oct 01 07:32:45 EDT 2015	111325	Fly Light	Sample#2189423187324829794	f		screen	Rubin	Aljoscha Nern	JRC_IS05226-20150911_42_E5	Drosophila melanogaster	20x
IS05228	this paper	54B12-p65ADZp in attP40_78G09-ZpGdbd in attP2	20150911_42_B2	nerna_is_screen_review	HAV5_X_0083	A01	Thu Oct 01 07:32:41 EDT 2015	111327	Fly Light	Sample#2189423172187586658	f		screen	Rubin	Aljoscha Nern	JRC_IS05228-20150911_42_B2	Drosophila melanogaster	20x
IS05229	this paper	54B12-p65ADZp in attP40_78H05-ZpGdbd in attP2	20150911_41_C3	nerna_is_screen_review	HAV5_X_0083	A01	Mon Sep 28 16:10:37 EDT 2015	111328	Fly Light	Sample#2188466349229998178	f		screen	Rubin	Aljoscha Nern	JRC_IS05229-20150911_41_C3	Drosophila melanogaster	20x
IS05230	this paper	70G12-p65ADZp in attP40_70F05-ZpGdbd in attP2	20150911_41_B5	nerna_is_screen_review	HAV5_X_0083	A01	Mon Sep 28 16:10:37 EDT 2015	111345	Fly Light	Sample#2188466348357582946	f		screen	Rubin	Aljoscha Nern	JRC_IS05230-20150911_41_B5	Drosophila melanogaster	20x
IS05233	this paper	75H08-p65ADZp in attP40; MKRS/TM6B_78H05-ZpGdbd in attP2	20150911_41_C4	nerna_is_screen_review	HAV5_X_0083	A01	Mon Sep 28 16:10:37 EDT 2015	111348	Fly Light	Sample#2188466349557153890	f		screen	Rubin	Aljoscha Nern	JRC_IS05233-20150911_41_C4	Drosophila melanogaster	20x
IS05234	this paper	78H05-p65ADZp in VK00027_23H07-ZpGdbd in attP2	20150911_41_B4	nerna_is_screen_review	HAV5_X_0083	A01	Mon Sep 28 16:10:37 EDT 2015	111349	Fly Light	Sample#2188466348084953186	f		screen	Rubin	Aljoscha Nern	JRC_IS05234-20150911_41_B4	Drosophila melanogaster	20x
IS05235	this paper	78H05-p65ADZp in VK00027_54B03-ZpGdbd in attP2	20150911_41_I4	nerna_is_screen_review	HAV5_X_0083	A01	Mon Sep 28 16:10:38 EDT 2015	111350	Fly Light	Sample#2188466353197809762	f		screen	Rubin	Aljoscha Nern	JRC_IS05235-20150911_41_I4	Drosophila melanogaster	20x
IS05236	this paper	78H05-p65ADZp in VK00027_75H08-ZpGdbd in attP2	20150911_41_C2	nerna_is_screen_review	HAV5_X_0083	A01	Mon Sep 28 16:10:37 EDT 2015	111351	Fly Light	Sample#2188466348940591202	f		screen	Rubin	Aljoscha Nern	JRC_IS05236-20150911_41_C2	Drosophila melanogaster	20x
IS05237	this paper	78H05-p65ADZp in attP40; MKRS/TM6B_23H07-ZpGdbd in attP2	20150911_41_B3	nerna_is_screen_review	HAV5_X_0083	A01	Mon Sep 28 16:10:37 EDT 2015	111356	Fly Light	Sample#2188466347808129122	f		screen	Rubin	Aljoscha Nern	JRC_IS05237-20150911_41_B3	Drosophila melanogaster	20x
IS05238	this paper	78H05-p65ADZp in attP40; MKRS/TM6B_26A02-ZpGdbd in attP2	20170224_41_H4	nerna_is_screen_review	UAS_Chrimson_Venus_X_0070	A01	Fri Mar 31 18:06:19 EDT 2017	145796	Fly Light	Sample#2387808791358865506	f		screen	Rubin	Aljoscha Nern	JRC_IS05238-20170224_41_H4	Drosophila melanogaster	20x
IS05239	this paper	78H05-p65ADZp in attP40; MKRS/TM6B_26E12-ZpGdbd in attP2	20150911_41_E2	nerna_is_screen_review	HAV5_X_0083	A01	Mon Sep 28 16:10:37 EDT 2015	111358	Fly Light	Sample#2188466350651867234	f		screen	Rubin	Aljoscha Nern	JRC_IS05239-20150911_41_E2	Drosophila melanogaster	20x
IS05240	this paper	78H05-p65ADZp in attP40; MKRS/TM6B_54B03-ZpGdbd in attP2	20150911_41_I3	nerna_is_screen_review	HAV5_X_0083	A01	Mon Sep 28 16:10:38 EDT 2015	111359	Fly Light	Sample#2188466352920985698	f		screen	Rubin	Aljoscha Nern	JRC_IS05240-20150911_41_I3	Drosophila melanogaster	20x
IS05241	this paper	78H05-p65ADZp in attP40; MKRS/TM6B_54B12-ZpGdbd in attP2	20150911_41_I6	nerna_is_screen_review	HAV5_X_0083	A01	Mon Sep 28 16:10:38 EDT 2015	111360	Fly Light	Sample#2188466353709514850	f		screen	Rubin	Aljoscha Nern	JRC_IS05241-20150911_41_I6	Drosophila melanogaster	20x
IS05242	this paper	78H05-p65ADZp in attP40; MKRS/TM6B_75H08-ZpGdbd in attP2	20150911_41_C1	nerna_is_screen_review	HAV5_X_0083	A01	Mon Sep 28 16:10:37 EDT 2015	111361	Fly Light	Sample#2188466348659572834	f		screen	Rubin	Aljoscha Nern	JRC_IS05242-20150911_41_C1	Drosophila melanogaster	20x
IS05243	this paper	w; 79H02-p65ADZ; MKRS/TM6B_70F05-ZpGdbd in attP2	20170224_45_C3	nerna_is_screen_review	UAS_Chrimson_Venus_X_0070	A01	Wed Mar 29 16:26:39 EDT 2017	145797	Fly Light	Sample#2387058935879172194	f		screen	Rubin	Aljoscha Nern	JRC_IS05243-20170224_45_C3	Drosophila melanogaster	20x
IS05244	this paper	w; 79H02-p65ADZ; MKRS/TM6B_93A05-ZpGDBD in attP2	20150911_42_E3	nerna_is_screen_review	HAV5_X_0083	A01	Thu Oct 01 07:32:43 EDT 2015	111364	Fly Light	Sample#2189423180462948450	f		screen	Rubin	Aljoscha Nern	JRC_IS05244-20150911_42_E3	Drosophila melanogaster	20x
IS05248	this paper	82F03-p65ADZp in attP40_22D12-ZpGdbd in attP2	20150911_42_E2	nerna_is_screen_review	HAV5_X_0083	A01	Thu Oct 01 07:32:42 EDT 2015	111371	Fly Light	Sample#2189423173437489250	f		screen	Rubin	Aljoscha Nern	JRC_IS05248-20150911_42_E2	Drosophila melanogaster	20x
IS05249	this paper	82F03-p65ADZp in attP40_55C09-ZpGdbd in attP2	20150911_41_G4	nerna_is_screen_review	HAV5_X_0083	A01	Mon Sep 28 16:10:38 EDT 2015	111372	Fly Light	Sample#2188466352044376162	f		screen	Rubin	Aljoscha Nern	JRC_IS05249-20150911_41_G4	Drosophila melanogaster	20x
IS05250	this paper	82F03-p65ADZp in attP40_72G03-ZpGdbd in attP2	20150911_41_H3	nerna_is_screen_review	HAV5_X_0083	A01	Mon Sep 28 16:10:38 EDT 2015	111373	Fly Light	Sample#2188466352342171746	f		screen	Rubin	Aljoscha Nern	JRC_IS05250-20150911_41_H3	Drosophila melanogaster	20x
IS05255	this paper	26F03-p65ADZp in attP40_VT010264-ZpGDBD in attP2	20150911_42_F5	nerna_is_screen_review	HAV5_X_0083	A01	Thu Oct 01 07:33:00 EDT 2015	111278	Fly Light	Sample#2189423252135215202	f		screen	Rubin	Aljoscha Nern	JRC_IS05255-20150911_42_F5	Drosophila melanogaster	20x
IS05260	this paper	26F03-p65ADZp in attP40_VT050313-ZpGdbd in attP2	20150911_42_H3	nerna_is_screen_review	HAV5_X_0083	A01	Thu Oct 01 07:33:11 EDT 2015	111283	Fly Light	Sample#2189423296452231266	f		screen	Rubin	Aljoscha Nern	JRC_IS05260-20150911_42_H3	Drosophila melanogaster	20x
IS05262	this paper	26F03-p65ADZp in attP40_VT024647-ZpGdbd in attP2	20150911_42_I1	nerna_is_screen_review	HAV5_X_0083	A01	Thu Oct 01 07:33:14 EDT 2015	111285	Fly Light	Sample#2189423309286801506	f		screen	Rubin	Aljoscha Nern	JRC_IS05262-20150911_42_I1	Drosophila melanogaster	20x
IS05267	this paper	26F03-p65ADZp in attP40_VT008183-ZpGDBD in attP2	20150911_41_A3	nerna_is_screen_review	HAV5_X_0083	A01	Mon Sep 28 16:10:36 EDT 2015	111290	Fly Light	Sample#2188466347271258210	f		screen	Rubin	Aljoscha Nern	JRC_IS05267-20150911_41_A3	Drosophila melanogaster	20x
IS05271	this paper	47H01-p65ADZp in attP40_VT048842-ZpGDBD in attP2	20150911_42_B1	nerna_is_screen_review	HAV5_X_0083	A01	Thu Oct 01 07:32:41 EDT 2015	111297	Fly Light	Sample#2189423171688464482	f		screen	Rubin	Aljoscha Nern	JRC_IS05271-20150911_42_B1	Drosophila melanogaster	20x
IS05275	this paper	48F07-p65ADZp in attP40; MKRS/TM6B_VT044322-ZpGDBD in attP2	20150911_41_A1	nerna_is_screen_review	HAV5_X_0083	A01	Mon Sep 28 16:10:36 EDT 2015	111303	Fly Light	Sample#2188466346629529698	f		screen	Rubin	Aljoscha Nern	JRC_IS05275-20150911_41_A1	Drosophila melanogaster	20x
IS05281	this paper	54B12-p65ADZp in attP40_VT048573-ZpGdbd in attP2	20150911_41_F2	nerna_is_screen_review	HAV5_X_0083	A01	Mon Sep 28 16:10:37 EDT 2015	111314	Fly Light	Sample#2188466351230681186	f		screen	Rubin	Aljoscha Nern	JRC_IS05281-20150911_41_F2	Drosophila melanogaster	20x
IS05284	this paper	54B12-p65ADZp in attP40_VT026000-ZpGDBD in attP2	20150911_42_A6	nerna_is_screen_review	HAV5_X_0083	A01	Thu Oct 01 07:32:41 EDT 2015	111317	Fly Light	Sample#2189423171411640418	f		screen	Rubin	Aljoscha Nern	JRC_IS05284-20150911_42_A6	Drosophila melanogaster	20x
IS05285	this paper	54B12-p65ADZp in attP40_VT048842-ZpGDBD in attP2	20150911_41_D1	nerna_is_screen_review	HAV5_X_0083	A01	Mon Sep 28 16:10:37 EDT 2015	111318	Fly Light	Sample#2188466349833977954	f		screen	Rubin	Aljoscha Nern	JRC_IS05285-20150911_41_D1	Drosophila melanogaster	20x
IS05287	this paper	54B12-p65ADZp in attP40_VT016966-ZpGDBD in attP2	20150911_42_D5	nerna_is_screen_review	HAV5_X_0083	A01	Thu Oct 01 07:32:40 EDT 2015	111320	Fly Light	Sample#2189423164805611618	f		screen	Rubin	Aljoscha Nern	JRC_IS05287-20150911_42_D5	Drosophila melanogaster	20x
IS05290	this paper	64F08-p65ADZp in attP40; MKRS/TM6B_VT010264-ZpGDBD in attP2	20150911_42_F6	nerna_is_screen_review	HAV5_X_0083	A01	Thu Oct 01 07:33:04 EDT 2015	111330	Fly Light	Sample#2189423265779286114	f		screen	Rubin	Aljoscha Nern	JRC_IS05290-20150911_42_F6	Drosophila melanogaster	20x
IS05294	this paper	64F08-p65ADZp in attP40; MKRS/TM6B_VT062633-ZpGdbd in attP2	20150911_42_H2	nerna_is_screen_review	HAV5_X_0083	A01	Thu Oct 01 07:33:08 EDT 2015	111334	Fly Light	Sample#2189423284183892066	f		screen	Rubin	Aljoscha Nern	JRC_IS05294-20150911_42_H2	Drosophila melanogaster	20x
IS05295	this paper	64F08-p65ADZp in attP40; MKRS/TM6B_VT050313-ZpGdbd in attP2	20150911_42_H4	nerna_is_screen_review	HAV5_X_0083	A01	Thu Oct 01 07:33:14 EDT 2015	111335	Fly Light	Sample#2189423309026754658	f		screen	Rubin	Aljoscha Nern	JRC_IS05295-20150911_42_H4	Drosophila melanogaster	20x
IS05300	this paper	64F08-p65ADZp in attP40; MKRS/TM6B_VT044982-ZpGdbd in attP2	20150911_42_D2	nerna_is_screen_review	HAV5_X_0083	A01	Thu Oct 01 07:32:41 EDT 2015	111340	Fly Light	Sample#2189423172435050594	f		screen	Rubin	Aljoscha Nern	JRC_IS05300-20150911_42_D2	Drosophila melanogaster	20x
IS05301	this paper	64F08-p65ADZp in attP40; MKRS/TM6B_VT014206-ZpGdbd in attP2	20150911_41_I1	nerna_is_screen_review	HAV5_X_0083	A01	Mon Sep 28 16:10:38 EDT 2015	111341	Fly Light	Sample#2188466352639967330	f		screen	Rubin	Aljoscha Nern	JRC_IS05301-20150911_41_I1	Drosophila melanogaster	20x
IS05304	this paper	65A12-p65ADZp in attP40_VT044322-ZpGDBD in attP2	20150911_41_A2	nerna_is_screen_review	HAV5_X_0083	A01	Mon Sep 28 16:10:36 EDT 2015	111344	Fly Light	Sample#2188466346994434146	f		screen	Rubin	Aljoscha Nern	JRC_IS05304-20150911_41_A2	Drosophila melanogaster	20x
IS05305	this paper	78H05-p65ADZp in attP40; MKRS/TM6B_VT008974-pZpGdbd in attP2	20150911_42_F2	nerna_is_screen_review	HAV5_X_0083	A01	Thu Oct 01 07:32:56 EDT 2015	111352	Fly Light	Sample#2189423232140968034	f		screen	Rubin	Aljoscha Nern	JRC_IS05305-20150911_42_F2	Drosophila melanogaster	20x
IS05310	this paper	82E12-p65ADZp in attP40_VT037863-ZpGDBD in attP2	20150911_41_G1	nerna_is_screen_review	HAV5_X_0083	A01	Mon Sep 28 16:10:37 EDT 2015	111368	Fly Light	Sample#2188466351499116642	f		screen	Rubin	Aljoscha Nern	JRC_IS05310-20150911_41_G1	Drosophila melanogaster	20x
IS05312	this paper	82F03-p65ADZp in attP40_VT042835-ZpGdbd in attP2	20150911_41_G2	nerna_is_screen_review	HAV5_X_0083	A01	Mon Sep 28 16:10:37 EDT 2015	111370	Fly Light	Sample#2188466351759163490	f		screen	Rubin	Aljoscha Nern	JRC_IS05312-20150911_41_G2	Drosophila melanogaster	20x
IS05509	this paper	VT016254-p65ADZp in attP40_VT016254-ZpGdbd in attP2	20170407_44_I1	wangk11_is_screen_review	HAV5_X_0083	A01	Fri Apr 28 15:30:05 EDT 2017	148961	Fly Light	Sample#2397916334978498658	m		screen	Dickson	Kaiyu Wang	JRC_IS05509-20170407_44_I1	Drosophila melanogaster	20x
IS05531	this paper	38B06-p65ADZp in attP40; MKRS/TM6B_14A12-ZpGdbd in attP2	20210212_43_B6	minegishir_is_screen_review	UAS_Chrimson_Venus_X_0070	A01	Tue Mar 02 15:44:09 EST 2021	221397	Fly Light	Sample#2906727539290407010	f		screen	Dickson	Ryo Minegishi	JRC_IS05531-20210212_43_B6	Drosophila melanogaster	20x
IS05622	this paper	VT040574-p65ADZp in attP40_45H03-ZpGDBD in attP2	20200214_44_E4	ditp_is_screen_review	UAS_Chrimson_Venus_X_0070	A01	Tue Mar 03 17:45:41 EST 2020	208046	Fly Light	Sample#2774848938484695138	f		screen	Descending Interneuron	Shigehiro Namiki	JRC_IS05622-20200214_44_E4	Drosophila melanogaster	20x
IS05685	this paper	81D05-p65ADZp in attP40/ CyO_72B05-ZpGdbd in attP2	20210326_43_A3	ditp_is_screen_review	UAS_Chrimson_Venus_X_0070	A01	Thu Apr 22 14:05:38 EDT 2021	224200	Fly Light	Sample#2925169428205142114	f		screen	Descending Interneuron	Shigehiro Namiki	JRC_IS05685-20210326_43_A3	Drosophila melanogaster	20x
IS05751	this paper	38E08-p65ADZp in attP40_12D12-ZpGdbd in attP2	20161209_45_A4	rubing_wolfft_is_screen_review	UAS_Chrimson_Venus_X_0070	A01	Thu Jan 05 15:00:47 EST 2017	140839	Fly Light	Sample#2356974234216956002	f		screen	Rubin	Tanya Wolff	JRC_IS05751-20161209_45_A4	Drosophila melanogaster	20x
IS05812	this paper	24A02-p65ADZp in attP40_21H11-ZpGdbd in attP2	20200821_44_A4	schretterc_is_screen_review	UAS_Chrimson_Venus_X_0070	A01	Thu Sep 03 15:29:36 EDT 2020	213773	Fly Light	Sample#2841478959529459810	f		screen	Rubin	Katie Schretter	JRC_IS05812-20200821_44_A4	Drosophila melanogaster	20x
IS05836	this paper	26C06-p65ADZp in attP40; MKRS/TM6B_14A12-ZpGdbd in attP2	20210514_48_H2	minegishir_is_screen_review	UAS_Chrimson_Venus_X_0070	A01	Wed Jun 02 17:33:42 EDT 2021	227479	Fly Light	Sample#2940079690771071074	f		screen	Dickson	Ryo Minegishi	JRC_IS05836-20210514_48_H2	Drosophila melanogaster	20x
IS05987	this paper	15D05-p65ADZp in attP40; MKRS/TM6B_15D05-ZpGdbd in attP2	20170310_52_E6	goldammerj_is_screen_review	UAS_Chrimson_Venus_X_0070	A	Thu Mar 30 17:34:44 EDT 2017	147728	Fly Light	Sample#2387438457359171682	f		screen	Terra Incognita	Jens Goldammer	JRC_IS05987-20170310_52_E6	Drosophila melanogaster	20x
IS06150	this paper	11C05-p65ADZp in attP40; MKRS/TM6B_11F03-ZpGdbd in attP2	20181130_48_B2	rubing_wolfft_is_screen_review	UAS_Chrimson_Venus_X_0070	A01	Tue Dec 18 16:27:51 EST 2018	182486	Fly Light	Sample#2615016303668232290	f		screen	Rubin	Tanya Wolff	JRC_IS06150-20181130_48_B2	Drosophila melanogaster	20x
IS06158	this paper	11C05-p65ADZp in attP40; MKRS/TM6B_28D04-ZpGdbd in attP2	20181130_48_E6	rubing_wolfft_is_screen_review	UAS_Chrimson_Venus_X_0070	A01	Tue Dec 18 16:27:51 EST 2018	182488	Fly Light	Sample#2615016305408868450	f		screen	Rubin	Tanya Wolff	JRC_IS06158-20181130_48_E6	Drosophila melanogaster	20x
IS06161	this paper	11C05-p65ADZp in attP40; MKRS/TM6B_33B06-ZpGdbd in attP2	20210205_45_F5	rubing_wolfft_is_screen_review	UAS_Chrimson_Venus_X_0070	A01	Thu Feb 25 14:01:41 EST 2021	221015	Fly Light	Sample#2904889812529971298	f		screen	Rubin	Tanya Wolff	JRC_IS06161-20210205_45_F5	Drosophila melanogaster	20x
IS06235	this paper	12E04-p65ADZp in attP40; MKRS/TM6B_72G07-ZpGdbd in attP2	20210205_42_A1	nerna_is_screen_review	UAS_Chrimson_Venus_X_0070	A01	Thu Feb 25 13:35:40 EST 2021	221180	Fly Light	Sample#2904883266051899490	f		screen	Rubin	Aljoscha Nern	JRC_IS06235-20210205_42_A1	Drosophila melanogaster	20x
IS06276	this paper	20A02-p65ADZp in attP40; MKRS/TM6B_12G08-ZpGdbd in attP2	20161223_41_E6	rubing_wolfft_is_screen_review	UAS_Chrimson_Venus_X_0070	A01	Mon Jan 09 08:40:12 EST 2017	141974	Fly Light	Sample#2358328006029607010	f		screen	Rubin	Tanya Wolff	JRC_IS06276-20161223_41_E6	Drosophila melanogaster	20x
IS06301	this paper	23G01-p65ADZp in attP40_11F03-ZpGdbd in attP2	20210115_44_C5	rubing_wolfft_is_screen_review	UAS_Chrimson_Venus_X_0070	A01	Fri Feb 05 15:24:10 EST 2021	220034	Fly Light	Sample#2897662811213660258	f		screen	Rubin	Tanya Wolff	JRC_IS06301-20210115_44_C5	Drosophila melanogaster	20x
IS06345	this paper	23G01-p65ADZp in attP40_12G08-ZpGdbd in attP2	20161223_41_F1	rubing_wolfft_is_screen_review	UAS_Chrimson_Venus_X_0070	A01	Mon Jan 09 08:40:12 EST 2017	141975	Fly Light	Sample#2358328006142853218	f		screen	Rubin	Tanya Wolff	JRC_IS06345-20161223_41_F1	Drosophila melanogaster	20x
IS06444	this paper	92E10-p65ADZp in attP40_33E06-ZpGdbd in attP2	20151218_51_B4	rubing_itom10_is_screen_review	UAS_Chrimson_Venus_X_0070	A04	Tue Jan 12 23:16:20 EST 2016	119080	Fly Light	Sample#2227001696456802402	f		screen	Terra Incognita	Masayoshi Ito	JRC_IS06444-20151218_51_B4	Drosophila melanogaster	20x
IS06591	this paper	68B06-p65ADZp in attP40; MKRS/TM6B_11B07-ZpGdbd in attP2	20210702_48_D3	asoy_is_screen_review	UAS_Chrimson_Venus_X_0070	A01	Tue Jul 27 15:39:39 EDT 2021	231301	Fly Light	Sample#2959982324420182114	f		screen	Aso	Yoshi Aso	JRC_IS06591-20210702_48_D3	Drosophila melanogaster	20x
IS06652	this paper	43D05-p65ADZp in attP40_16C05-ZpGdbd in attP2	20160527_51_E5	rubing_itom10_is_screen_review	UAS_Chrimson_Venus_X_0070	A	Tue Jun 14 09:41:38 EDT 2016	127882	Fly Light	Sample#2282589301873053794	f		screen	Terra Incognita	Masayoshi Ito	JRC_IS06652-20160527_51_E5	Drosophila melanogaster	20x
IS06680	this paper	12G04-p65ADzp in attP40; MKRS/TM6B_16C05-ZpGdbd in attP2	20210507_48_A2	wangk11_is_screen_review	UAS_Chrimson_Venus_X_0070	A01	Thu May 27 14:27:08 EDT 2021	226983	Fly Light	Sample#2937858411871600738	f		screen	Dickson	Kaiyu Wang	JRC_IS06680-20210507_48_A2	Drosophila melanogaster	20x
IS06682	this paper	14F03-p65ADZp in attP40; MKRS/TM6B_16C05-ZpGdbd in attP2	20160527_51_C5	rubing_itom10_is_screen_review	UAS_Chrimson_Venus_X_0070	A	Tue Jun 14 09:41:34 EDT 2016	127867	Fly Light	Sample#2282589283200008290	f		screen	Terra Incognita	Masayoshi Ito	JRC_IS06682-20160527_51_C5	Drosophila melanogaster	20x
IS06690	this paper	25D01-p65ADZp in attP40_25D01-ZpGdbd in attP2	20170310_51_E4	goldammerj_is_screen_review	UAS_Chrimson_Venus_X_0070	A	Thu Mar 30 18:08:46 EDT 2017	147729	Fly Light	Sample#2387447019531665506	f		screen	Terra Incognita	Jens Goldammer	JRC_IS06690-20170310_51_E4	Drosophila melanogaster	20x
IS06690	this paper	25D01-p65ADZp in attP40_25D01-ZpGdbd in attP2	20210326_46_A4	nerna_is_screen_review	UAS_Chrimson_Venus_X_0070	A01	Fri Apr 09 17:36:12 EDT 2021	224317	Fly Light	Sample#2920511374079557730	f		screen	Rubin	Aljoscha Nern	JRC_IS06690-20210326_46_A4	Drosophila melanogaster	20x
IS07055	this paper	Tdc2-p65ADZp in attP40; MKRS/TM6B_57C10-ZpGdbd in attP2	20160617_41_G6	nerna_is_screen_review	UAS_Chrimson_Venus_X_0070	A01	Thu Jul 28 08:39:13 EDT 2016	128307	Fly Light	Sample#2298518663713521762	f		screen	Rubin	Aljoscha Nern	JRC_IS07055-20160617_41_G6	Drosophila melanogaster	20x
IS07150	this paper	20H11-p65ADZp in attP40_34E01-ZpGdbd in attP2	20160205_52_A2	goldammerj_is_screen_review	UAS_Chrimson_Venus_X_0070	A02	Thu Feb 25 07:31:24 EST 2016	121390	Fly Light	Sample#2242708965072830562	f		screen	Terra Incognita	Jens Goldammer	JRC_IS07150-20160205_52_A2	Drosophila melanogaster	20x
IS07350	this paper	59A06-p65ADZp in attP40_HAV5; Sco/CyO; 38A11-ZpGdbd in attP2	20160226_41_A2	nerna_is_screen_review	HAV5_X_0083	A01	Wed Apr 20 15:10:12 EDT 2016	121940	Fly Light	Sample#2262740657598627938	f		screen	Rubin	Aljoscha Nern	JRC_IS07350-20160226_41_A2	Drosophila melanogaster	20x
IS07384	this paper	91A01-p65ADZp in attP40_HAV5; Sco/CyO; 95E11-ZpGdbd in attP2	20160415_51_D5	rubing_itom10_is_screen_review	UAS_Chrimson_Venus_X_0070	A00	Tue May 24 07:47:59 EDT 2016	125495	Fly Light	Sample#2274950555606450213	f		screen	Terra Incognita	Masayoshi Ito	JRC_IS07384-20160415_51_D5	Drosophila melanogaster	20x
IS07439	this paper	70G12-p65ADZp in attP40_70G12-ZpGDBD in attP2	20190517_42_A5	minegishir_is_screen_review	UAS_Chrimson_Venus_X_0070	A01	Wed Jun 12 14:12:01 EDT 2019	191842	Fly Light	Sample#2678747284941832290	m		screen	Dickson	Ryo Minegishi	JRC_IS07439-20190517_42_A5	Drosophila melanogaster	20x
IS07441	this paper	70G12-p65ADZp in attP40_82F10-ZpGdbd in attP2	20190517_42_C2	minegishir_is_screen_review	UAS_Chrimson_Venus_X_0070	A01	Wed Jun 12 14:12:01 EDT 2019	191836	Fly Light	Sample#2678747286221095010	m		screen	Dickson	Ryo Minegishi	JRC_IS07441-20190517_42_C2	Drosophila melanogaster	20x
IS07449	this paper	12G04-p65ADzp in attP40; MKRS/TM6B_14F03-ZpGdbd in attP2	20160527_51_B5	rubing_itom10_is_screen_review	UAS_Chrimson_Venus_X_0070	A	Tue Jun 14 09:41:32 EDT 2016	127863	Fly Light	Sample#2282589275335688290	f		screen	Terra Incognita	Masayoshi Ito	JRC_IS07449-20160527_51_B5	Drosophila melanogaster	20x
IS07453	this paper	12G04-p65ADzp in attP40; MKRS/TM6B_54D11-ZpGdbd in attP2	20161021_43_A1	nerna_is_screen_review	UAS_Chrimson_Venus_X_0070	A01	Fri Nov 11 13:34:31 EST 2016	136992	Fly Light	Sample#2337021189609750673	f		screen	Rubin	Aljoscha Nern	JRC_IS07453-20161021_43_A1	Drosophila melanogaster	20x
IS07458	this paper	14F03-p65ADZp in attP40; MKRS/TM6B_54D11-ZpGdbd in attP2	20161021_42_B5	nerna_is_screen_review	UAS_Chrimson_Venus_X_0070	A01	Thu Nov 10 14:49:47 EST 2016	136993	Fly Light	Sample#2336677743346843746	f		screen	Rubin	Aljoscha Nern	JRC_IS07458-20161021_42_B5	Drosophila melanogaster	20x
IS07529	this paper	64E12-p65ADZp in attP40; MKRS/TM6B_92E10-ZpGdbd in attP2	20210319_42_F6	schretterc_is_screen_review	UAS_Chrimson_Venus_X_0070	A01	Tue Apr 06 13:15:05 EDT 2021	223900	Fly Light	Sample#2919358501601935458	f		screen	Rubin	Katie Schretter	JRC_IS07529-20210319_42_F6	Drosophila melanogaster	20x
IS07535	this paper	66A01-p65ADZp in attP40_53C04-ZpGdbd in attP2	20160902_43_C6	nerna_is_screen_review	UAS_Chrimson_Venus_X_0070	A01	Thu Sep 29 12:24:26 EDT 2016	133764	Fly Light	Sample#2321405773487276177	f		screen	Rubin	Aljoscha Nern	JRC_IS07535-20160902_43_C6	Drosophila melanogaster	20x
IS07554	this paper	w; 92H07-p65ADZp; MKRS/ TM6B_30A07-ZpGdbd in attP2	20161104_42_C5	nerna_is_screen_review	UAS_Chrimson_Venus_X_0070	A01	Tue Nov 29 10:51:36 EST 2016	138234	Fly Light	Sample#2343503170866511900	f		screen	Rubin	Aljoscha Nern	JRC_IS07554-20161104_42_C5	Drosophila melanogaster	20x
IS07593	this paper	18H11-p65ADZp in attP40 (lethal/CyO)_77H08-ZpGdbd in attP2	20160729_43_E3	nerna_is_screen_review	UAS_Chrimson_Venus_X_0070	A01	Thu Aug 25 09:29:05 EDT 2016	131760	Fly Light	Sample#2308678073400164497	f		screen	Rubin	Aljoscha Nern	JRC_IS07593-20160729_43_E3	Drosophila melanogaster	20x
IS07650	this paper	55E10-p65ADZp in attP40_22E12-ZpGdbd in attP2	20151002_41_G4	nerna_is_screen_review	UAS_Chrimson_Venus_X_0070	A01	Mon Oct 19 13:26:22 EDT 2015	112664	Fly Light	Sample#2196035161672384610	f		screen	Rubin	Aljoscha Nern	JRC_IS07650-20151002_41_G4	Drosophila melanogaster	20x
IS07667	this paper	66A01-p65ADZp in attP40_HAV5; Sco/CyO; 26C03-ZpGdbd in attP2	20151009_43_E4	nerna_is_screen_review	HAV5_X_0083	A01	Tue Oct 27 02:49:31 EDT 2015	113038	Fly Light	Sample#2198773992951644234	f		screen	Rubin	Aljoscha Nern	JRC_IS07667-20151009_43_E4	Drosophila melanogaster	20x
IS07782	this paper	14F03-p65ADZp in attP40; MKRS/TM6B_36B07-ZpGdbd in attP2	20210310_42_E2	nerna_is_screen_review	UAS_Chrimson_Venus_X_0070	A01	Wed Apr 14 17:15:27 EDT 2021	223159	Fly Light	Sample#2922318094078574690	f		screen	Rubin	Aljoscha Nern	JRC_IS07782-20210310_42_E2	Drosophila melanogaster	20x
IS07789	this paper	26C03-p65ADZp in attP40_21E02-ZpGdbd in attP2	20151002_42_E4	nerna_is_screen_review	UAS_Chrimson_Venus_X_0070	A01	Wed Oct 21 14:02:27 EDT 2015	112665	Fly Light	Sample#2196769015022485602	f		screen	Rubin	Aljoscha Nern	JRC_IS07789-20151002_42_E4	Drosophila melanogaster	20x
IS08077	this paper	65H10-p65ADZp in attP40; MKRS/TM6B_12D12-ZpGdbd in attP2	20161209_45_A6	rubing_wolfft_is_screen_review	UAS_Chrimson_Venus_X_0070	A01	Thu Jan 05 15:00:47 EST 2017	140841	Fly Light	Sample#2356974234439254114	f		screen	Rubin	Tanya Wolff	JRC_IS08077-20161209_45_A6	Drosophila melanogaster	20x
IS08123	this paper	34B02-p65ADZp in attP40_34B02-ZpGdbd in attP2	20210212_46_E6	minegishir_is_screen_review	UAS_Chrimson_Venus_X_0070	A01	Tue Mar 16 15:12:12 EDT 2021	221490	Fly Light	Sample#2911777829366530146	f		screen	Dickson	Ryo Minegishi	JRC_IS08123-20210212_46_E6	Drosophila melanogaster	20x
IS08153	this paper	65E11-p65ADZp in attP40_11F12-ZpGdbd in attP2	20170714_45_F5	asoy_is_screen_review	UAS_Chrimson_Venus_X_0070	A01	Tue Jan 16 14:27:52 EST 2018	155617	Fly Light	Sample#2493223784236974178	f		screen	Rubin	Yoshi Aso	JRC_IS08153-20170714_45_F5	Drosophila melanogaster	20x
IS08153	this paper	65E11-p65ADZp in attP40_11F12-ZpGdbd in attP2	20191122_46_A2	minegishir_is_screen_review	UAS_Chrimson_Venus_X_0070	A01	Wed Jan 08 17:56:30 EST 2020	203804	Fly Light	Sample#2754920329007595618	f		screen	Dickson	Ryo Minegishi	JRC_IS08153-20191122_46_A2	Drosophila melanogaster	20x
IS08174	this paper	76F09-p65ADZp in attP40_82C10-ZpGdbd in attP2	20160715_51_A1	rubing_itom10_is_screen_review	UAS_Chrimson_Venus_X_0070	A	Wed Aug 10 07:24:24 EDT 2016	131262	Fly Light	Sample#2303210876166996042	f		screen	Terra Incognita	Masayoshi Ito	JRC_IS08174-20160715_51_A1	Drosophila melanogaster	20x
IS08226	this paper	11F12-p65ADZp in attP40_65E11-ZpGdbd in attP2	20170714_45_F1	asoy_is_screen_review	UAS_Chrimson_Venus_X_0070	A01	Tue Jan 16 14:27:51 EST 2018	155597	Fly Light	Sample#2493223783989510242	f		screen	Rubin	Yoshi Aso	JRC_IS08226-20170714_45_F1	Drosophila melanogaster	20x
IS08281	this paper	42F06-p65ADZp in attP40/ CyO; MKRS/TM6B_71F08-ZpGdbd in attP2	20160219_41_E4	nerna_is_screen_review	HAV5_X_0083	A01	Wed Mar 09 00:44:02 EST 2016	121688	Fly Light	Sample#2247317489841078309	f		screen	Rubin	Aljoscha Nern	JRC_IS08281-20160219_41_E4	Drosophila melanogaster	20x
IS08304	this paper	59E08-p65ADZp in attP40_71F08-ZpGdbd in attP2	20160219_41_E5	nerna_is_screen_review	HAV5_X_0083	A01	Wed Mar 09 00:44:03 EST 2016	121689	Fly Light	Sample#2247317491040649253	f		screen	Rubin	Aljoscha Nern	JRC_IS08304-20160219_41_E5	Drosophila melanogaster	20x
IS08446	this paper	59E08-p65ADZp in attP40_82E04-ZpGdbd in attP2	20151016_46_A4	nerna_is_screen_review	HAV5_X_0083	A01	Tue Nov 03 16:29:00 EST 2015	113586	Fly Light	Sample#2201532039780368458	f		screen	Rubin	Aljoscha Nern	JRC_IS08446-20151016_46_A4	Drosophila melanogaster	20x
IS08447	this paper	59E08-p65ADZp in attP40_94F01-ZpGdbd in attP2	20160219_42_F4	nerna_is_screen_review	HAV5_X_0083	A01	Wed Mar 09 00:44:08 EST 2016	121690	Fly Light	Sample#2247317512301576229	f		screen	Rubin	Aljoscha Nern	JRC_IS08447-20160219_42_F4	Drosophila melanogaster	20x
IS08448	this paper	59E08-p65ADZp in attP40_94H01-ZpGdbd in attP2	20151023_44_D5	nerna_is_screen_review	HAV5_X_0083	A01	Tue Nov 10 11:18:10 EST 2015	113772	Fly Light	Sample#2203990528683409482	f		screen	Rubin	Aljoscha Nern	JRC_IS08448-20151023_44_D5	Drosophila melanogaster	20x
IS08499	this paper	21A01-p65ADZp in attP40_78H08-ZpGdbd in attP2	20170810_42_E4	nerna_is_screen_review	UAS_Chrimson_Venus_X_0070	A01	Wed Sep 27 15:55:12 EDT 2017	156873	Fly Light	Sample#2453005610724098146	f		screen	Rubin	Aljoscha Nern	JRC_IS08499-20170810_42_E4	Drosophila melanogaster	20x
IS08516	this paper	66A06-p65ADZp in attP40_79B08-ZpGdbd in attP2	20161028_43_I4	nerna_is_screen_review	UAS_Chrimson_Venus_X_0070	A01	Tue Nov 29 10:52:13 EST 2016	137519	Fly Light	Sample#2343503327670566940	f		screen	Rubin	Aljoscha Nern	JRC_IS08516-20161028_43_I4	Drosophila melanogaster	20x
IS08601	this paper	52C06-p65ADZp in attP40_15C05-ZpGdbd in attP2	20170324_42_F5	nerna_is_screen_review	UAS_Chrimson_Venus_X_0070	A01	Tue Apr 18 15:10:52 EDT 2017	148101	Fly Light	Sample#2394287620306763874	f		screen	Rubin	Aljoscha Nern	JRC_IS08601-20170324_42_F5	Drosophila melanogaster	20x
IS08602	this paper	52F12-p65ADZp in attP40_14G02-ZpGdbd in attP2	20160401_52_G2	goldammerj_is_screen_review	UAS_Chrimson_Venus_X_0070	A00	Tue Apr 19 14:59:06 EDT 2016	124579	Fly Light	Sample#2262375478142697570	f		screen	Terra Incognita	Jens Goldammer	JRC_IS08602-20160401_52_G2	Drosophila melanogaster	20x
IS08766	this paper	49G12-p65ADZp in attP40_58G03-ZpGdbd in attP2	20170526_44_D3	nerna_is_screen_review	UAS_Chrimson_Venus_X_0070	A01	Tue Jun 20 15:55:48 EDT 2017	152346	Fly Light	Sample#2417129363309854818	f		screen	Rubin	Aljoscha Nern	JRC_IS08766-20170526_44_D3	Drosophila melanogaster	20x
IS08829	this paper	92C07-p65ADZp in attP40; MKRS/TM6B_58G03-ZpGdbd in attP2	20210806_41_B5	nerna_is_screen_review	UAS_Chrimson_Venus_X_0070	A01	Thu Aug 26 12:17:17 EDT 2021	233932	Fly Light	Sample#2970803029449637986	f		screen	Rubin	Aljoscha Nern	JRC_IS08829-20210806_41_B5	Drosophila melanogaster	20x
IS08890	this paper	28F07-p65ADZp in attP40_41A12-ZpGdbd in attP2	20160408_43_H3	nerna_is_screen_review	UAS_Chrimson_Venus_X_0070	A01	Sat Apr 23 15:24:59 EDT 2016	124401	Fly Light	Sample#2263831543791222882	f		screen	Rubin	Aljoscha Nern	JRC_IS08890-20160408_43_H3	Drosophila melanogaster	20x
IS08950	this paper	67E03-p65ADZp in attP40_81E11-ZpGdbd in attP2	20210409_41_G6	nerna_is_screen_review	UAS_Chrimson_Venus_X_0070	A01	Thu Apr 22 14:45:43 EDT 2021	225285	Fly Light	Sample#2925179514059227234	f		screen	Rubin	Aljoscha Nern	JRC_IS08950-20210409_41_G6	Drosophila melanogaster	20x
IS08962	this paper	92C07-p65ADZp in attP40; MKRS/TM6B_20H05-ZpGdbd in attP2	20170113_41_G5	nerna_is_screen_review	UAS_Chrimson_Venus_X_0070	A01	Wed Feb 01 19:05:41 EST 2017	142910	Fly Light	Sample#2366820337858904092	f		screen	Rubin	Aljoscha Nern	JRC_IS08962-20170113_41_G5	Drosophila melanogaster	20x
IS09135	this paper	24B11-p65ADZp in attP40; MKRS/TM6B_13E12-ZpGdbd in attP2	20180316_42_C2	rubing_is_screen_review	UAS_Chrimson_Venus_X_0070	A01	Mon Apr 02 13:44:51 EDT 2018	167766	Fly Light	Sample#2520739337767747682	f		screen	Rubin	Gerry Rubin	JRC_IS09135-20180316_42_C2	Drosophila melanogaster	20x
IS09185	this paper	52G05-p65ADZp in attP40_20H08-ZpGdbd in attP2	20160923_51_B3	rubing_itom10_is_screen_review	UAS_Chrimson_Venus_X_0070	A00	Mon Oct 17 10:52:42 EDT 2016	135966	Fly Light	Sample#2327905672991080593	f		screen	Terra Incognita	Masayoshi Ito	JRC_IS09185-20160923_51_B3	Drosophila melanogaster	20x
IS09259	this paper	38E07-p65ADZp in attP40; MKRS/TM6B_15E01-ZpGdbd in attP2	20160212_41_E1	nerna_is_screen_review	HAV5_X_0083	A01	Wed Mar 30 00:30:44 EDT 2016	121149	Fly Light	Sample#2254909188851368010	f		screen	Rubin	Aljoscha Nern	JRC_IS09259-20160212_41_E1	Drosophila melanogaster	20x
IS09320	this paper	34E07-p65ADZp in attP40; MKRS/TM6B_20A03-ZpGdbd in attP2	20170602_44_D3	wangk11_is_screen_review	HAV5_X_0083	A01	Wed Jul 05 15:41:28 EDT 2017	152696	Fly Light	Sample#2422561575853359202	m		screen	Dickson	Kaiyu Wang	JRC_IS09320-20170602_44_D3	Drosophila melanogaster	20x
IS09412	this paper	80C07-p65ADZp in attP40_20F06-ZpGdbd in attP2	20210219_48_A1	rubing_wolfft_is_screen_review	UAS_Chrimson_Venus_X_0070	A01	Tue Mar 16 13:11:09 EDT 2021	221907	Fly Light	Sample#2911747364584685666	f		screen	Rubin	Tanya Wolff	JRC_IS09412-20210219_48_A1	Drosophila melanogaster	20x
IS09475	this paper	24B11-p65ADZp in attP40; MKRS/TM6B_18H03-ZpGdbd in attP2	20210416_46_A5	minegishir_is_screen_review	UAS_Chrimson_Venus_X_0070	A01	Thu Apr 29 14:25:09 EDT 2021	225502	Fly Light	Sample#2927711055964536930	f		screen	Dickson	Ryo Minegishi	JRC_IS09475-20210416_46_A5	Drosophila melanogaster	20x
IS09563	this paper	70G12-p65ADZp in attP40_19A04-ZpGdbd in attP2	20210305_44_G5	minegishir_is_screen_review	UAS_Chrimson_Venus_X_0070	A01	Tue Apr 06 12:58:25 EDT 2021	222826	Fly Light	Sample#2919354306853339234	f		screen	Dickson	Ryo Minegishi	JRC_IS09563-20210305_44_G5	Drosophila melanogaster	20x
IS09749	this paper	22G01-p65ADZp in attP40_94D12-ZpGdbd in attP2	20190823_44_A6	ditp_is_screen_review	UAS_Chrimson_Venus_X_0070	A01	Tue Oct 08 16:33:16 EDT 2019	198430	Fly Light	Sample#2721544601885212770	f		screen	Descending Interneuron	Shigehiro Namiki	JRC_IS09749-20190823_44_A6	Drosophila melanogaster	20x
IS09750	this paper	23C12-p65ADZp in attP40_17H12-ZpGdbd in attP2	20170609_52_H6	rubing_itom10_is_screen_review	UAS_Chrimson_Venus_X_0070	A	Tue Jun 27 17:43:02 EDT 2017	154033	Fly Light	Sample#2419693063254311010	f		screen	Terra Incognita	Masayoshi Ito	JRC_IS09750-20170609_52_H6	Drosophila melanogaster	20x
IS09775	this paper	47D05-p65ADZp in attP40_94D12-ZpGdbd in attP2	20190823_44_B1	ditp_is_screen_review	UAS_Chrimson_Venus_X_0070	A01	Tue Oct 08 16:33:16 EDT 2019	198437	Fly Light	Sample#2721544601981681762	f		screen	Descending Interneuron	Shigehiro Namiki	JRC_IS09775-20190823_44_B1	Drosophila melanogaster	20x
IS09814	this paper	19F05-p65ADZp in attP40_13H04-ZpGdbd in attP2	20160311_53_H1	rubing_dolanm_is_screen_review	UAS_Chrimson_Venus_X_0070	A00	Tue Mar 29 00:42:20 EDT 2016	122845	Fly Light	Sample#2254549720703696970	f		screen	Terra Incognita	Michael-John Dolan	JRC_IS09814-20160311_53_H1	Drosophila melanogaster	20x
IS09814	this paper	19F05-p65ADZp in attP40_13H04-ZpGdbd in attP2	20160715_51_J1	rubing_itom10_is_screen_review	UAS_Chrimson_Venus_X_0070	A	Wed Aug 10 07:24:25 EDT 2016	131263	Fly Light	Sample#2303210881372127306	f		screen	Terra Incognita	Masayoshi Ito	JRC_IS09814-20160715_51_J1	Drosophila melanogaster	20x
IS09832	this paper	54E12-p65ADZp in attP40; MKRS/TM6B_95G08-ZpGdbd in attP2	20210604_47_A4	minegishir_is_screen_review	UAS_Chrimson_Venus_X_0070	A01	Fri Jun 18 15:00:16 EDT 2021	229352	Fly Light	Sample#2945839282696224866	f		screen	Dickson	Ryo Minegishi	JRC_IS09832-20210604_47_A4	Drosophila melanogaster	20x
IS09833	this paper	64D11-p65ADZp in attP40_13H04-ZpGdbd in attP2	20160715_51_D2	rubing_itom10_is_screen_review	UAS_Chrimson_Venus_X_0070	A	Wed Aug 10 07:24:24 EDT 2016	131264	Fly Light	Sample#2303210877379149898	f		screen	Terra Incognita	Masayoshi Ito	JRC_IS09833-20160715_51_D2	Drosophila melanogaster	20x
IS09871	this paper	VT017242-p65ADZp in attP2_85F05-ZpGDBD in attP2	20151211_51_H2	rubing_itom10_is_screen_review	UAS_Chrimson_Venus_X_0070	A00	Wed Mar 02 00:12:38 EST 2016		Fly Light	Sample#2244772871643594826	f		screen			JRC_IS09871-20151211_51_H2	Drosophila melanogaster	20x
IS09955	this paper	64D11-p65ADZp in attP40_50F12-ZpGdbd in attP2	20160715_51_E2	rubing_itom10_is_screen_review	UAS_Chrimson_Venus_X_0070	A	Wed Aug 10 07:24:24 EDT 2016	131265	Fly Light	Sample#2303210877773414474	f		screen	Terra Incognita	Masayoshi Ito	JRC_IS09955-20160715_51_E2	Drosophila melanogaster	20x
IS09957	this paper	64D11-p65ADZp in attP40_HAV5; CyO/Sco; 74A06-ZpGDBD in attP2	20160415_51_I5	rubing_itom10_is_screen_review	UAS_Chrimson_Venus_X_0070	A00	Tue May 24 07:48:00 EDT 2016	125496	Fly Light	Sample#2274950559368740901	f		screen	Terra Incognita	Masayoshi Ito	JRC_IS09957-20160415_51_I5	Drosophila melanogaster	20x
IS10035	this paper	w; 26E02-p65ADZp; MKRS/TM6B_81E05-ZpGdbd in attP2	20210326_42_E5	ditp_is_screen_review	UAS_Chrimson_Venus_X_0070	A01	Mon Apr 12 17:18:09 EDT 2021	224212	Fly Light	Sample#2921593995379343458	f		screen	Descending Interneuron	Shigehiro Namiki	JRC_IS10035-20210326_42_E5	Drosophila melanogaster	20x
IS100552	10.1101/2024.10.21.619448	w; VT000771-p65ADZp in attP40; VT050231-ZpGDBD in attP2/TM6b	20221118_42_C1	rubing_wolfft_is_screen_review	UAS_Chrimson_Venus_X_0070	A01	Tue Dec 13 11:28:40 EST 2022	252072	Fly Light	Sample#3142577742898266210	f		screen	Rubin	Tanya Wolff	JRC_IS100552-20221118_42_C1	Drosophila melanogaster	20x
IS100553	10.1101/2024.10.21.619448	w; VT000771-p65ADZp in attP40/CyO; VT049921-pZpGdbd in attP2	20221118_42_B1	rubing_wolfft_is_screen_review	UAS_Chrimson_Venus_X_0070	A01	Tue Dec 13 11:28:39 EST 2022	252073	Fly Light	Sample#3142577741925187682	f		screen	Rubin	Tanya Wolff	JRC_IS100553-20221118_42_B1	Drosophila melanogaster	20x
IS100561	10.1101/2024.10.21.619448	w; 35A11-p65ADZp in attP40; VT049921-pZpGdbd in attP2	20221118_42_B6	rubing_wolfft_is_screen_review	UAS_Chrimson_Venus_X_0070	A01	Tue Dec 13 11:28:40 EST 2022	252081	Fly Light	Sample#3142577742726299746	f		screen	Rubin	Tanya Wolff	JRC_IS100561-20221118_42_B6	Drosophila melanogaster	20x
IS10096	this paper	87D07-p65ADZp in attP40_65D06-ZpGdbd in attP2	20180727_44_A5	rubing_is_screen_review	UAS_Chrimson_Venus_X_0070	A01	Thu Aug 09 15:58:55 EDT 2018	175587	Fly Light	Sample#2567521114032963682	f		screen	Rubin	Gerry Rubin	JRC_IS10096-20180727_44_A5	Drosophila melanogaster	20x
IS101367	10.1101/2024.10.21.619448	w; ; 53C03-p65ADZp in VK00027, VT064568-ZpGdbd in attP2	20230120_42_E6	rubing_wolfft_is_screen_review	UAS_Chrimson_Venus_X_0070	A01	Fri Feb 03 15:15:10 EST 2023	253340	Fly Light	Sample#3161478915629776994	f		screen	Rubin	Tanya Wolff	JRC_IS101367-20230120_42_E6	Drosophila melanogaster	20x
IS101418	10.1101/2024.10.21.619448	w; VT027003-p65ADZp in attP40; 15D05-ZpGdbd in attP2	20230120_42_I3	rubing_wolfft_is_screen_review	UAS_Chrimson_Venus_X_0070	A01	Fri Feb 03 15:15:11 EST 2023	253316	Fly Light	Sample#3161478917626265698	f		screen	Rubin	Tanya Wolff	JRC_IS101418-20230120_42_I3	Drosophila melanogaster	20x
IS101453	10.1101/2024.10.21.619448	w; VT025779-p65ADZp in attP40; 51F07-ZpGdbd in attP2	20230120_42_B4	rubing_wolfft_is_screen_review	UAS_Chrimson_Venus_X_0070	A01	Fri Feb 03 15:05:10 EST 2023	253303	Fly Light	Sample#3161476396375605346	f		screen	Rubin	Tanya Wolff	JRC_IS101453-20230120_42_B4	Drosophila melanogaster	20x
IS10200	this paper	VT007770-p65ADZp in attP40_49C12-ZpGdbd in attP2	20210326_47_E6	minegishir_is_screen_review	UAS_Chrimson_Venus_X_0070	A01	Mon Apr 12 17:17:41 EDT 2021	224008	Fly Light	Sample#2921593877716533346	f		screen	Dickson	Ryo Minegishi	JRC_IS10200-20210326_47_E6	Drosophila melanogaster	20x
IS10200	this paper	VT007770-p65ADZp in attP40_49C12-ZpGdbd in attP2	20210514_43_E2	nerna_is_screen_review	UAS_Chrimson_Venus_X_0070	A01	Fri May 28 12:50:42 EDT 2021	227659	Fly Light	Sample#2938196531154518114	f		screen	Rubin	Aljoscha Nern	JRC_IS10200-20210514_43_E2	Drosophila melanogaster	20x
IS102081	10.1101/2024.10.21.619448	w; ; 14F05-p65ADZp in su(Hw)attP1, 19G02-ZpGdbd in attP2	20230217_44_A1	rubing_wolfft_is_screen_review	UAS_Chrimson_Venus_X_0070	A01	Thu Mar 02 11:41:41 EST 2023	254324	Fly Light	Sample#3171209659503607967	f		screen	Rubin	Tanya Wolff	JRC_IS102081-20230217_44_A1	Drosophila melanogaster	20x
IS102104	10.1101/2024.10.21.619448	w; VT043144-p65ADZp in attP40; VT048348-ZpGDBD in attP2/TM6B	20230217_43_D4	rubing_wolfft_is_screen_review	UAS_Chrimson_Venus_X_0070	A01	Fri Mar 03 13:17:11 EST 2023	254237	Fly Light	Sample#3171596081729372319	f		screen	Rubin	Tanya Wolff	JRC_IS102104-20230217_43_D4	Drosophila melanogaster	20x
IS102116	10.1101/2024.10.21.619448	w; VT060202-p65ADZp in JK22C; 33B06-ZpGdbd in attP2	20230217_43_I5	rubing_wolfft_is_screen_review	UAS_Chrimson_Venus_X_0070	A01	Fri Mar 03 13:17:12 EST 2023	254357	Fly Light	Sample#3171596085621686431	f		screen	Rubin	Tanya Wolff	JRC_IS102116-20230217_43_I5	Drosophila melanogaster	20x
IS10213	this paper	VT027273-p65ADZp in attP40_53H03-ZpGdbd in attP2	20210528_45_B5	asoy_is_screen_review	UAS_Chrimson_Venus_X_0070	A01	Mon Jul 26 14:58:41 EDT 2021	228524	Fly Light	Sample#2959609624489099362	f		screen	Aso	Yoshi Aso	JRC_IS10213-20210528_45_B5	Drosophila melanogaster	20x
IS10254	this paper	VT029592-p65ADZp in attP40_21C11-ZpGdbd in attP2/ TM3	20190927_44_C5	ditp_is_screen_review	UAS_Chrimson_Venus_X_0070	A01	Fri Oct 25 15:48:42 EDT 2019	200332	Fly Light	Sample#2727693976558633058	f		screen	Descending Interneuron	Shigehiro Namiki	JRC_IS10254-20190927_44_C5	Drosophila melanogaster	20x
IS10274	this paper	VT025966-p65ADZp in attP40_28D01-ZpGdbd in attP2	20210528_47_I3	asoy_is_screen_review	UAS_Chrimson_Venus_X_0070	A01	Fri Aug 06 13:44:41 EDT 2021	228553	Fly Light	Sample#2963577269563424866	f		screen	Aso	Yoshi Aso	JRC_IS10274-20210528_47_I3	Drosophila melanogaster	20x
IS10614	this paper	VT029309-p65ADZp in attP40_VT032900-ZpGDBD in attP2	20160715_53_H5	sterneg_is_screen_review	UAS_Chrimson_Venus_X_0070	A01	Thu Aug 18 13:09:42 EDT 2016	131170	Fly Light	Sample#2306196877743227025	f		screen	Terra Incognita	Gabriella Sterne	JRC_IS10614-20160715_53_H5	Drosophila melanogaster	20x
IS10619	this paper	58E07-p65ADZp in attP40_VT020379-ZpGDBD in attP2	20190906_45_F2	minegishir_is_screen_review	UAS_Chrimson_Venus_X_0070	A01	Fri Sep 20 14:18:24 EDT 2019	198672	Fly Light	Sample#2714987677354033250	f		screen	Dickson	Ryo Minegishi	JRC_IS10619-20190906_45_F2	Drosophila melanogaster	20x
IS10622	this paper	VT020610-p65ADZ in attP40_VT048418-ZpGDBD in attP2	20190322_41_F2	minegishir_is_screen_review	UAS_Chrimson_Venus_X_0070	A01	Mon Apr 08 15:36:52 EDT 2019	188208	Fly Light	Sample#2655213427798048866	m		screen	Dickson	Ryo Minegishi	JRC_IS10622-20190322_41_F2	Drosophila melanogaster	20x
IS10710	this paper	VT004985-p65ADZp in attP40_HAV5; Sco/CyO; 24A03-ZpGdbd in attP2	20170519_51_B1	goldammerj_is_screen_review	UAS_Chrimson_Venus_X_0070	A	Thu Jun 08 16:40:41 EDT 2017	152526	Fly Light	Sample#2412792003331883106	f		screen	Terra Incognita	Jens Goldammer	JRC_IS10710-20170519_51_B1	Drosophila melanogaster	20x
IS10737	this paper	VT057470-p65ADZp in attP40_VT058736-ZpGdbd in attP2	20161021_42_A5	nerna_is_screen_review	UAS_Chrimson_Venus_X_0070	A01	Thu Nov 10 14:49:45 EST 2016	136994	Fly Light	Sample#2336677736493351010	f		screen	Rubin	Aljoscha Nern	JRC_IS10737-20161021_42_A5	Drosophila melanogaster	20x
IS10834	this paper	17A04-p65ADZp in attP40; MKRS/TM6B_37G12-ZpGdbd in attP2	20210423_46_C4	ditp_is_screen_review	UAS_Chrimson_Venus_X_0070	A01	Fri May 14 15:09:38 EDT 2021	226063	Fly Light	Sample#2933158066062884962	f		screen	Descending Interneuron	Shigehiro Namiki	JRC_IS10834-20210423_46_C4	Drosophila melanogaster	20x
IS10843	this paper	59B10-p65ADZp in attP40; MKRS/TM6B_93B10-ZpGdbd in attP2	20160311_51_B2	goldammerj_is_screen_review	UAS_Chrimson_Venus_X_0070	A00	Tue Mar 29 00:43:23 EDT 2016	122574	Fly Light	Sample#2254549983015469093	f		screen	Terra Incognita	Jens Goldammer	JRC_IS10843-20160311_51_B2	Drosophila melanogaster	20x
IS10947	this paper	VT024634-p65ADZp in attP40_48E01-ZpGdbd in attP2	20161014_43_E6	asoy_is_screen_review	UAS_Chrimson_Venus_X_0070	A01	Thu Nov 10 16:29:03 EST 2016	136465	Fly Light	Sample#2336702723266707601	f		screen	Rubin	Yoshi Aso	JRC_IS10947-20161014_43_E6	Drosophila melanogaster	20x
IS10991	this paper	VT058394-p65ADZ in attP40_VT015830-ZpGDBD in attP2	20161007_44_A4	asoy_is_screen_review	UAS_Chrimson_Venus_X_0070	A01	Fri Nov 11 13:07:40 EST 2016	134685	Fly Light	Sample#2337014431478710417	f		screen	Rubin	Yoshi Aso	JRC_IS10991-20161007_44_A4	Drosophila melanogaster	20x
IS11034	this paper	VT056374-p65ADZp in attP40_35G08-ZpGdbd in attP2	20161216_51_I6	rubing_itom10_is_screen_review	UAS_Chrimson_Venus_X_0070	A00	Tue Jan 10 08:29:50 EST 2017	142430	Fly Light	Sample#2358687785868591202	f		screen	Terra Incognita	Masayoshi Ito	JRC_IS11034-20161216_51_I6	Drosophila melanogaster	20x
IS11042	this paper	VT008142-p65ADZ in attP40_35G08-ZpGdbd in attP2	20161216_51_I3	rubing_itom10_is_screen_review	UAS_Chrimson_Venus_X_0070	A00	Tue Jan 10 08:29:50 EST 2017	142439	Fly Light	Sample#2358687785386246242	f		screen	Terra Incognita	Masayoshi Ito	JRC_IS11042-20161216_51_I3	Drosophila melanogaster	20x
IS11135	this paper	VT008142-p65ADZ in attP40_VT056374-ZpGdbd in attP2	20161216_51_I5	rubing_itom10_is_screen_review	UAS_Chrimson_Venus_X_0070	A00	Tue Jan 10 08:29:50 EST 2017	142438	Fly Light	Sample#2358687785709207650	f		screen	Terra Incognita	Masayoshi Ito	JRC_IS11135-20161216_51_I5	Drosophila melanogaster	20x
IS11145	this paper	VT058899-p65ADZp in attP40_VT048655-ZpGdbd in attP2	20210129_43_F6	nerna_is_screen_review	UAS_Chrimson_Venus_X_0070	A01	Mon Mar 01 16:07:10 EST 2021	220759	Fly Light	Sample#2906370943125291106	f		screen	Rubin	Aljoscha Nern	JRC_IS11145-20210129_43_F6	Drosophila melanogaster	20x
IS11162	this paper	VT039344-p65ADZp in attP40_VT026842-ZpGdbd in attP2	20181220_41_E5	wangk11_is_screen_review	UAS_Chrimson_Venus_X_0070	A01	Wed Jan 16 12:47:56 EST 2019	183609	Fly Light	Sample#2625470208881459298	m		screen	Dickson	Kaiyu Wang	JRC_IS11162-20181220_41_E5	Drosophila melanogaster	20x
IS11168	this paper	VT056374-p65ADZp in attP40_22C12-ZpGdbd in attP2/ TM3	20170728_52_A5	sterneg_is_screen_review	UAS_Chrimson_Venus_X_0070	A	Thu Aug 17 16:59:40 EDT 2017	157067	Fly Light	Sample#2438163934549639266	f		screen	Terra Incognita	Gabriella Sterne	JRC_IS11168-20170728_52_A5	Drosophila melanogaster	20x
IS11196	this paper	22C05-p65ADZp in attP40_HAV5; CyO/Sp; 33A01-ZpGDBD in attP2	20190927_44_H2	ditp_is_screen_review	UAS_Chrimson_Venus_X_0070	A01	Fri Oct 25 15:48:42 EDT 2019	200383	Fly Light	Sample#2727693980006350946	f		screen	Descending Interneuron	Shigehiro Namiki	JRC_IS11196-20190927_44_H2	Drosophila melanogaster	20x
IS11200	this paper	w; 26E02-p65ADZp; MKRS/TM6B_HAV5; CyO/Sp; 33A01-ZpGDBD in attP2	20190927_44_I5	ditp_is_screen_review	UAS_Chrimson_Venus_X_0070	A01	Fri Oct 25 15:48:43 EDT 2019	200385	Fly Light	Sample#2727693981306585186	f		screen	Descending Interneuron	Shigehiro Namiki	JRC_IS11200-20190927_44_I5	Drosophila melanogaster	20x
IS11217	this paper	42B02-p65ADZp in attP40; MKRS/TM6B_55A03-ZpGdbd in attP2	20210611_44_F1	ditp_is_screen_review	UAS_Chrimson_Venus_X_0070	A01	Tue Jun 29 13:35:38 EDT 2021	229881	Fly Light	Sample#2949804250416283746	f		screen	Descending Interneuron	Shigehiro Namiki	JRC_IS11217-20210611_44_F1	Drosophila melanogaster	20x
IS11236	this paper	75C10-p65ADZp in attP40; MKRS/TM6B_HAV5; CyO/Sp; 33A01-ZpGDBD in attP2	20190927_44_J1	ditp_is_screen_review	UAS_Chrimson_Venus_X_0070	A01	Fri Oct 25 15:48:43 EDT 2019	200390	Fly Light	Sample#2727693981650518114	f		screen	Descending Interneuron	Shigehiro Namiki	JRC_IS11236-20190927_44_J1	Drosophila melanogaster	20x
IS11333	this paper	VT034628-p65ADZp in attP40_HAV5; CyO/Sp; 33A01-ZpGDBD in attP2	20190927_44_H4	ditp_is_screen_review	UAS_Chrimson_Venus_X_0070	A01	Fri Oct 25 15:48:42 EDT 2019	200375	Fly Light	Sample#2727693980178317410	f		screen	Descending Interneuron	Shigehiro Namiki	JRC_IS11333-20190927_44_H4	Drosophila melanogaster	20x
IS11350	this paper	w; 11H10-p65ADZp; MKRS/TM6B_VT008749-ZpGdbd in attP2	20160701_51_C5	rubing_itom10_is_screen_review	UAS_Chrimson_Venus_X_0070	A00	Tue Jul 26 00:52:56 EDT 2016	130227	Fly Light	Sample#2297676543410831458	f		screen	Terra Incognita	Masayoshi Ito	JRC_IS11350-20160701_51_C5	Drosophila melanogaster	20x
IS11426	this paper	32A11-p65ADZp in attP40_VT028606-ZpGdbd in attP2	20210730_43_G1	nerna_is_screen_review	UAS_Chrimson_Venus_X_0070	A01	Wed Aug 18 16:50:23 EDT 2021	233375	Fly Light	Sample#2967972654377599074	f		screen	Rubin	Aljoscha Nern	JRC_IS11426-20210730_43_G1	Drosophila melanogaster	20x
IS11447	this paper	59E08-p65ADZp in attP40_VT015785-ZpGdbd in attP2	20151016_46_B3	nerna_is_screen_review	HAV5_X_0083	A01	Tue Nov 03 16:29:01 EST 2015	113587	Fly Light	Sample#2201532041739108426	f		screen	Rubin	Aljoscha Nern	JRC_IS11447-20151016_46_B3	Drosophila melanogaster	20x
IS11482	this paper	VT049125-p65ADZp in attP40_VT009671-ZpGDBD in attP2	20201023_46_F4	nerna_is_screen_review	UAS_Chrimson_Venus_X_0070	A01	Thu Nov 19 05:57:38 EST 2020	215326	Fly Light	Sample#2869253987557703778	f		screen	Rubin	Aljoscha Nern	JRC_IS11482-20201023_46_F4	Drosophila melanogaster	20x
IS11494	this paper	VT009671-p65ADZp in attP40_VT049125-ZpGdbd in attP2	20201023_46_E3	nerna_is_screen_review	UAS_Chrimson_Venus_X_0070	A01	Thu Nov 19 05:57:42 EST 2020	215346	Fly Light	Sample#2869254004573995106	f		screen	Rubin	Aljoscha Nern	JRC_IS11494-20201023_46_E3	Drosophila melanogaster	20x
IS11510	this paper	VT046799-p65ADZp in attP40_VT057241-ZpGDBD in attP2	20200214_44_B6	ditp_is_screen_review	UAS_Chrimson_Venus_X_0070	A01	Tue Mar 03 17:45:40 EST 2020	208001	Fly Light	Sample#2774848935741620322	f		screen	Descending Interneuron	Shigehiro Namiki	JRC_IS11510-20200214_44_B6	Drosophila melanogaster	20x
IS11527	this paper	VT045670-p65ADZp in attP40_VT049125-ZpGdbd in attP2	20201023_46_B5	nerna_is_screen_review	UAS_Chrimson_Venus_X_0070	A01	Thu Nov 19 05:57:40 EST 2020	215345	Fly Light	Sample#2869253995086479458	f		screen	Rubin	Aljoscha Nern	JRC_IS11527-20201023_46_B5	Drosophila melanogaster	20x
IS11528	this paper	VT045670-p65ADZp in attP40_VT009671-ZpGDBD in attP2	20201023_46_E2	nerna_is_screen_review	UAS_Chrimson_Venus_X_0070	A01	Thu Nov 19 05:57:42 EST 2020	215325	Fly Light	Sample#2869254003785465954	f		screen	Rubin	Aljoscha Nern	JRC_IS11528-20201023_46_E2	Drosophila melanogaster	20x
IS11546	this paper	65H10-p65ADZp in attP40; MKRS/TM6B_73H08-ZpGdbd in attP2	20210205_42_B2	nerna_is_screen_review	UAS_Chrimson_Venus_X_0070	A01	Thu Feb 25 13:35:41 EST 2021	221162	Fly Light	Sample#2904883268337795170	f		screen	Rubin	Aljoscha Nern	JRC_IS11546-20210205_42_B2	Drosophila melanogaster	20x
IS11630	this paper	VT009671-p65ADZp in attP40_VT045670-ZpGDBD in attP2	20201023_46_E5	nerna_is_screen_review	UAS_Chrimson_Venus_X_0070	A01	Thu Nov 19 05:57:43 EST 2020	215320	Fly Light	Sample#2869254005341552738	f		screen	Rubin	Aljoscha Nern	JRC_IS11630-20201023_46_E5	Drosophila melanogaster	20x
IS11643	this paper	VT056376-p65ADZ in attP40_VT007357-ZpGDBD in attP2	20210326_44_C4	ditp_is_screen_review	UAS_Chrimson_Venus_X_0070	A01	Fri Apr 09 16:46:21 EDT 2021	223946	Fly Light	Sample#2920498830967308386	f		screen	Descending Interneuron	Han Cheong	JRC_IS11643-20210326_44_C4	Drosophila melanogaster	20x
IS11672	this paper	w; 18C12-p65ADZp; MKRS/TM6B_19H10-ZpGdbd in attP2	20160429_52_B4	mckellarc_is_screen_review	HAV5_X_0083	A00	Mon May 23 15:39:21 EDT 2016	124171	Fly Light	Sample#2274706790920749154	f		screen	Terra Incognita	Christa Baker	JRC_IS11672-20160429_52_B4	Drosophila melanogaster	20x
IS11741	this paper	92C07-p65ADZp in attP40; MKRS/TM6B_VT018137-ZpGdbd in attP2	20210806_41_H2	nerna_is_screen_review	UAS_Chrimson_Venus_X_0070	A01	Thu Aug 26 12:17:18 EDT 2021	233840	Fly Light	Sample#2970803034394722402	f		screen	Rubin	Aljoscha Nern	JRC_IS11741-20210806_41_H2	Drosophila melanogaster	20x
IS11773	this paper	VT005404-p65ADZp in attP40_VT009837-ZpGDBD in attP2	20160401_42_D4	nerna_is_screen_review	UAS_Chrimson_Venus_X_0070	A01	Tue Apr 19 15:52:41 EDT 2016	123912	Fly Light	Sample#2262388962318352482	f		screen	Rubin	Aljoscha Nern	JRC_IS11773-20160401_42_D4	Drosophila melanogaster	20x
IS11939	this paper	VT030322-p65ADZ in attP40_VT000605-ZpGdbd in attP2	20210409_41_G2	nerna_is_screen_review	UAS_Chrimson_Venus_X_0070	A01	Thu Apr 22 14:45:43 EDT 2021	225253	Fly Light	Sample#2925179513216172130	f		screen	Rubin	Aljoscha Nern	JRC_IS11939-20210409_41_G2	Drosophila melanogaster	20x
IS12043	this paper	VT026325-p65ADZp in attP40_HAV5; Sco/CyO; 42F06-ZpGdbd in attP2	20151016_47_H1	nerna_is_screen_review	HAV5_X_0083	A01	Sat Nov 28 20:23:24 EST 2015	113588	Fly Light	Sample#2210650722897231970	f		screen	Rubin	Aljoscha Nern	JRC_IS12043-20151016_47_H1	Drosophila melanogaster	20x
IS12089	this paper	VT018764-p65ADZp in attP40_18C12-ZpGdbd in attP2	20170714_46_C1	asoy_is_screen_review	UAS_Chrimson_Venus_X_0070	A01	Fri Dec 15 15:53:34 EST 2017	155571	Fly Light	Sample#2481648943499313250	f		screen	Rubin	Yoshi Aso	JRC_IS12089-20170714_46_C1	Drosophila melanogaster	20x
IS12187	this paper	VT013594-p65ADZp in attP40_80G02-ZpGdbd in attP2	20210326_44_D5	ditp_is_screen_review	UAS_Chrimson_Venus_X_0070	A01	Fri Apr 09 16:46:21 EDT 2021	223962	Fly Light	Sample#2920498831365767266	f		screen	Descending Interneuron	Han Cheong	JRC_IS12187-20210326_44_D5	Drosophila melanogaster	20x
IS12243	this paper	22A02-p65ADZp in attP40_21H11-ZpGdbd in attP2	20180323_47_B3	wangk11_is_screen_review	UAS_Chrimson_Venus_X_0070	A01	Fri Apr 13 15:29:53 EDT 2018	168007	Fly Light	Sample#2524752039909523554	m		screen	Dickson	Kaiyu Wang	JRC_IS12243-20180323_47_B3	Drosophila melanogaster	20x
IS12440	this paper	VT043158-p65ADZp in attP40_VT002435-ZpGdbd in attP2	20170623_52_E2	rubing_itom10_is_screen_review	UAS_Chrimson_Venus_X_0070	A	Thu Jul 13 16:58:47 EDT 2017	154933	Fly Light	Sample#2425480133973377169	f		screen	Terra Incognita	Masayoshi Ito	JRC_IS12440-20170623_52_E2	Drosophila melanogaster	20x
IS12524	this paper	VT012403-p65ADZp in attP40_VT029592-ZpGdbd in attP2	20190927_44_B2	ditp_is_screen_review	UAS_Chrimson_Venus_X_0070	A01	Fri Oct 25 15:48:41 EDT 2019	200273	Fly Light	Sample#2727693975174512738	f		screen	Descending Interneuron	Shigehiro Namiki	JRC_IS12524-20190927_44_B2	Drosophila melanogaster	20x
IS12540	this paper	VT043158-p65ADZp in attP40_VT000877-ZpGdbd in attP2	20170623_52_B6	rubing_itom10_is_screen_review	UAS_Chrimson_Venus_X_0070	A	Thu Jul 13 16:58:46 EDT 2017	154935	Fly Light	Sample#2425480132589256849	f		screen	Terra Incognita	Masayoshi Ito	JRC_IS12540-20170623_52_B6	Drosophila melanogaster	20x
IS12548	this paper	VT007170-p65ADZp in attP40_VT029822-ZpGdbd in attP2	20190816_48_D6	wangk11_is_screen_review	UAS_Chrimson_Venus_X_0070	A01	Fri Sep 06 17:43:09 EDT 2019	195681	Fly Light	Sample#2709965773597573218	f		screen	dickson	Kaiyu Wang	JRC_IS12548-20190816_48_D6	Drosophila melanogaster	20x
IS12551	this paper	VT029592-p65ADZp in attP40_VT012403-ZpGDBD in attP2	20190927_45_G4	ditp_is_screen_review	UAS_Chrimson_Venus_X_0070	A01	Wed Nov 06 15:27:23 EST 2019	200243	Fly Light	Sample#2732052367812853858	f		screen	Descending Interneuron	Shigehiro Namiki	JRC_IS12551-20190927_45_G4	Drosophila melanogaster	20x
IS12555	this paper	VT000254-p65ADZp in attP40_VT037566-ZpGdbd in attP2	20170407_43_G6	dicksonb_is_screen_review	HAV5_X_0083	A01	Fri Apr 28 15:03:01 EDT 2017	149026	Fly Light	Sample#2397909525744058466	f		screen	Dickson	Ryo Minegishi	JRC_IS12555-20170407_43_G6	Drosophila melanogaster	20x
IS12598	this paper	56B05-p65ADZp in attP40_VT043927-ZpGDBD in attP2	20151218_42_B3	nerna_is_screen_review	HAV5_X_0083	A01	Fri Jan 08 15:41:00 EST 2016	118314	Fly Light	Sample#2225437556839809122	f		screen	Rubin	Aljoscha Nern	JRC_IS12598-20151218_42_B3	Drosophila melanogaster	20x
IS12599	this paper	56B05-p65ADZp in attP40_VT014708-ZpGdbd in attP2	20160212_51_J4	rubing_itom10_is_screen_review	UAS_Chrimson_Venus_X_0070	A01	Wed Mar 02 00:12:47 EST 2016	121908	Fly Light	Sample#2244772910893891658	f		screen	Terra Incognita	Masayoshi Ito	JRC_IS12599-20160212_51_J4	Drosophila melanogaster	20x
IS12649	this paper	22A12-p65ADZp in attP40_VT049240-ZpGdbd in attP2	20160701_41_E1	ditp_is_screen_review	UAS_Chrimson_Venus_X_0070	A01	Fri Jul 22 16:57:18 EDT 2016	129332	Fly Light	Sample#2296469680568664101	f		screen	Descending Interneuron	Shigehiro Namiki	JRC_IS12649-20160701_41_E1	Drosophila melanogaster	20x
IS12653	this paper	w; 26E02-p65ADZp; MKRS/TM6B_VT048635-ZpGDBD in attP2	20210716_45_F3	ditp_is_screen_review	UAS_Chrimson_Venus_X_0070	A01	Fri Jul 30 14:24:11 EDT 2021	232051	Fly Light	Sample#2961050496195887202	f		screen	Descending Interneuron	Shigehiro Namiki	JRC_IS12653-20210716_45_F3	Drosophila melanogaster	20x
IS12690	this paper	VT042810-p65ADZ in attP40_VT017416-ZpGdbd in attP2	20170210_52_B5	rubing_itom10_is_screen_review	UAS_Chrimson_Venus_X_0070	A	Wed Mar 08 14:05:08 EST 2017	145140	Fly Light	Sample#2379428276494925922	f		screen	Terra Incognita	Masayoshi Ito	JRC_IS12690-20170210_52_B5	Drosophila melanogaster	20x
IS12732	this paper	VT044843-p65ADZp in attP40_54B03-ZpGdbd in attP2	20190913_46_E3	minegishir_is_screen_review	UAS_Chrimson_Venus_X_0070	A01	Tue Oct 08 16:49:49 EDT 2019	199522	Fly Light	Sample#2721548766392877154	f		screen	Dickson	Ryo Minegishi	JRC_IS12732-20190913_46_E3	Drosophila melanogaster	20x
IS12807	this paper	42B02-p65ADZp in attP40; MKRS/TM6B_VT037825-ZpGdbd in attP2	20190927_43_G1	ditp_is_screen_review	UAS_Chrimson_Venus_X_0070	A01	Thu Oct 24 17:31:49 EDT 2019	200287	Fly Light	Sample#2727357541905334370	f		screen	Descending Interneuron	Shigehiro Namiki	JRC_IS12807-20190927_43_G1	Drosophila melanogaster	20x
IS12894	this paper	26H07-p65ADZp in attP40; MKRS/TM6B_VT033647-ZpGDBD in attP2	20170818_52_F3	rubing_itom10_is_screen_review	UAS_Chrimson_Venus_X_0070	A	Wed Sep 06 18:10:23 EDT 2017	158089	Fly Light	Sample#2445429487244935266	f		screen	Terra Incognita	Masayoshi Ito	JRC_IS12894-20170818_52_F3	Drosophila melanogaster	20x
IS12955	this paper	w; 77H03-p65ADZp; MKRS/ TM6B_VT039961-ZpGDBD in attP2	20210122_43_J2	minegishir_is_screen_review	UAS_Chrimson_Venus_X_0070	A01	Thu Feb 11 13:34:44 EST 2021	220187	Fly Light	Sample#2899809599685132386	f		screen	Dickson	Ryo Minegishi	JRC_IS12955-20210122_43_J2	Drosophila melanogaster	20x
IS13261	this paper	VT045108-p65ADZp in attP40_VT031567-ZpGDBD in attP2	20160701_41_H3	ditp_is_screen_review	UAS_Chrimson_Venus_X_0070	A01	Fri Jul 22 16:57:18 EDT 2016	129334	Fly Light	Sample#2296469682661621797	f		screen	Descending Interneuron	Shigehiro Namiki	JRC_IS13261-20160701_41_H3	Drosophila melanogaster	20x
IS13273	this paper	VT011132-p65ADZp in attP40_VT027273-ZpGdbd in attP2	20190927_44_E4	ditp_is_screen_review	UAS_Chrimson_Venus_X_0070	A01	Fri Oct 25 15:48:42 EDT 2019	200298	Fly Light	Sample#2727693978282492002	f		screen	Descending Interneuron	Shigehiro Namiki	JRC_IS13273-20190927_44_E4	Drosophila melanogaster	20x
IS13337	this paper	w; 56H08-p65ADZp; MKRS/ TM6B_VT027273-ZpGdbd in attP2	20190927_44_F4	ditp_is_screen_review	UAS_Chrimson_Venus_X_0070	A01	Fri Oct 25 15:48:42 EDT 2019	200300	Fly Light	Sample#2727693978974552162	f		screen	Descending Interneuron	Shigehiro Namiki	JRC_IS13337-20190927_44_F4	Drosophila melanogaster	20x
IS13386	this paper	VT032228-p65ADZp in attP40_61A01-ZpGdbd in attP2	20160304_43_G3	nerna_is_screen_review	HAV5_X_0083	A01	Wed Mar 30 00:30:50 EDT 2016	122325	Fly Light	Sample#2254909211756462154	f		screen	Rubin	Aljoscha Nern	JRC_IS13386-20160304_43_G3	Drosophila melanogaster	20x
IS13399	this paper	81D05-p65ADZp in attP40/ CyO_VT038823-ZpGdbd in attP2	20210716_48_I1	ditp_is_screen_review	UAS_Chrimson_Venus_X_0070	A01	Fri Jul 30 14:20:11 EDT 2021	232114	Fly Light	Sample#2961049489122525282	f		screen	Descending Interneuron	Shigehiro Namiki	JRC_IS13399-20210716_48_I1	Drosophila melanogaster	20x
IS13423	this paper	VT013947-p65ADZp in attP40_76F12-ZpGDBD in attP2	20160408_52_B1	goldammerj_is_screen_review	UAS_Chrimson_Venus_X_0070	A00	Mon Apr 25 16:35:58 EDT 2016	124580	Fly Light	Sample#2264574182463373349	f		screen	Terra Incognita	Jens Goldammer	JRC_IS13423-20160408_52_B1	Drosophila melanogaster	20x
IS13470	this paper	VT057286-p65ADZp in attP40_VT023749-ZpGDBD in attP2	20161007_42_G1	nerna_is_screen_review	UAS_Chrimson_Venus_X_0070	A01	Mon Oct 31 10:16:14 EDT 2016	136099	Fly Light	Sample#2332969923820650594	f		screen	Rubin	Aljoscha Nern	JRC_IS13470-20161007_42_G1	Drosophila melanogaster	20x
IS13545	this paper	VT046828-p65ADZp in attP40_VT049105-ZpGdbd in attP2	20160429_42_J4	nerna_is_screen_review	UAS_Chrimson_Venus_X_0070	A01	Wed May 25 07:35:21 EDT 2016	125612	Fly Light	Sample#2275309765850562658	f		screen	Rubin	Aljoscha Nern	JRC_IS13545-20160429_42_J4	Drosophila melanogaster	20x
IS13569	this paper	26A02-p65ADZp in attP40_VT028450-ZpGdbd in attP2	20190719_44_B1	ditp_is_screen_review	UAS_Chrimson_Venus_X_0070	A01	Wed Aug 14 18:05:43 EDT 2019	196187	Fly Light	Sample#2701636532212596834	f		screen	Descending Interneuron	Shigehiro Namiki	JRC_IS13569-20190719_44_B1	Drosophila melanogaster	20x
IS13616	this paper	VT038216-p65ADZp in attP40_53A05-ZpGdbd in attP2	20210611_41_C2	schretterc_is_screen_review	UAS_Chrimson_Venus_X_0070	A01	Thu Jun 24 14:32:39 EDT 2021	230053	Fly Light	Sample#2948006661983305826	f		screen	Rubin	Katie Schretter	JRC_IS13616-20210611_41_C2	Drosophila melanogaster	20x
IS13623	this paper	10A12-p65ADZp in attP40_VT042001-ZpGdbd in attP2	20160701_41_J1	ditp_is_screen_review	UAS_Chrimson_Venus_X_0070	A01	Fri Jul 22 16:57:18 EDT 2016	129336	Fly Light	Sample#2296469683605340197	f		screen	Descending Interneuron	Shigehiro Namiki	JRC_IS13623-20160701_41_J1	Drosophila melanogaster	20x
IS13709	this paper	w; 72B05-p65ADZ; MKRS/TM6B_42A06-ZpGdbd in attP2	20170106_42_B2	dicksonb_is_screen_review	HAV5_X_0083	A01	Wed Jan 25 09:04:43 EST 2017	142875	Fly Light	Sample#2364132383961120866	m		screen	Dickson	Ryo Minegishi	JRC_IS13709-20170106_42_B2	Drosophila melanogaster	20x
IS13712	this paper	w; 92H07-p65ADZp; MKRS/ TM6B_72B05-ZpGdbd in attP2	20170728_42_C6	dicksonb_is_screen_review	UAS_Chrimson_Venus_X_0070	A01	Wed Aug 30 16:50:14 EDT 2017	156461	Fly Light	Sample#2442872603249999970	m		screen	Dickson	Ryo Minegishi	JRC_IS13712-20170728_42_C6	Drosophila melanogaster	20x
IS13727	this paper	60A10-p65ADZp in attP40_VT057286-ZpGDBD in attP2	20161021_41_D5	nerna_is_screen_review	UAS_Chrimson_Venus_X_0070	A01	Fri Nov 11 14:00:05 EST 2016	136995	Fly Light	Sample#2337027622971637905	f		screen	Rubin	Aljoscha Nern	JRC_IS13727-20161021_41_D5	Drosophila melanogaster	20x
IS14066	this paper	11D02-p65ADZp in attP40; MKRS/TM6B_VT010661-ZpGDBD in attP2	20160325_42_H5	nerna_is_screen_review	UAS_Chrimson_Venus_X_0070	A01	Wed Apr 13 16:42:47 EDT 2016	123527	Fly Light	Sample#2260227241604546658	f		screen	Rubin	Aljoscha Nern	JRC_IS14066-20160325_42_H5	Drosophila melanogaster	20x
IS14731	this paper	VT046782-p65ADZp in attP40_VT009081-ZpGdbd in attP2	20160909_43_A1	dicksonb_is_screen_review	HAV5_X_0083	A01	Tue Oct 04 09:48:28 EDT 2016	133959	Fly Light	Sample#2323178464011616401	m		screen	Dickson	Barry Dickson	JRC_IS14731-20160909_43_A1	Drosophila melanogaster	20x
IS14822	this paper	VT017491-p65ADZ in attP40_VT048573-ZpGdbd in attP2	20210806_42_G4	nerna_is_screen_review	UAS_Chrimson_Venus_X_0070	A01	Tue Aug 24 13:08:45 EDT 2021	233867	Fly Light	Sample#2970091207838924898	f		screen	Rubin	Aljoscha Nern	JRC_IS14822-20210806_42_G4	Drosophila melanogaster	20x
IS14829	this paper	VT020742-p65ADZp in attP40_VT004422-ZpGdbd in attP2	20161223_44_C3	nerna_is_screen_review	UAS_Chrimson_Venus_X_0070	A01	Tue Jan 24 09:00:00 EST 2017	141802	Fly Light	Sample#2363768807891140706	f		screen	Rubin	Aljoscha Nern	JRC_IS14829-20161223_44_C3	Drosophila melanogaster	20x
IS14997	this paper	22D03-p65ADZp in attP40_92E10-ZpGdbd in attP2	20210319_42_E2	schretterc_is_screen_review	UAS_Chrimson_Venus_X_0070	A01	Tue Apr 06 13:15:05 EDT 2021	223901	Fly Light	Sample#2919358500146511970	f		screen	Rubin	Katie Schretter	JRC_IS14997-20210319_42_E2	Drosophila melanogaster	20x
IS15111	this paper	13E04-p65ADZp in attP40; MKRS/TM6B_48G01-ZpGdbd in attP2	20210108_46_I4	minegishir_is_screen_review	UAS_Chrimson_Venus_X_0070	A01	Tue Jan 26 14:05:36 EST 2021	219405	Fly Light	Sample#2894019159916544098	f		screen	Dickson	Ryo Minegishi	JRC_IS15111-20210108_46_I4	Drosophila melanogaster	20x
IS15202	this paper	VT017491-p65ADZ in attP40_84E05-ZpGdbd in attP2	20210806_42_A2	nerna_is_screen_review	UAS_Chrimson_Venus_X_0070	A01	Tue Aug 24 13:08:44 EDT 2021	233951	Fly Light	Sample#2970091201924956258	f		screen	Rubin	Aljoscha Nern	JRC_IS15202-20210806_42_A2	Drosophila melanogaster	20x
IS15256	this paper	22A12-p65ADZp in attP40_31B01-ZpGdbd in attP2	20150918_52_A1	rubing_dolanm_is_screen_review	UAS_Chrimson_Venus_X_0070	A01	Fri Oct 02 15:22:46 EDT 2015	112400	Fly Light	Sample#2189903857373413474	f		screen	Terra Incognita	Michael-John Dolan	JRC_IS15256-20150918_52_A1	Drosophila melanogaster	20x
IS15260	this paper	31D07-p65ADZp in attP40_45F12-ZpGdbd in attP2	20201016_48_B4	nerna_is_screen_review	UAS_Chrimson_Venus_X_0070	A01	Tue Nov 03 15:13:12 EST 2020	215047	Fly Light	Sample#2863595591898759266	f		screen	Rubin	Aljoscha Nern	JRC_IS15260-20201016_48_B4	Drosophila melanogaster	20x
IS15260	this paper	31D07-p65ADZp in attP40_45F12-ZpGdbd in attP2	20150918_52_A3	rubing_dolanm_is_screen_review	UAS_Chrimson_Venus_X_0070	A01	Fri Oct 02 15:22:46 EDT 2015	112403	Fly Light	Sample#2189903861303488610	f		screen	Terra Incognita	Michael-John Dolan	JRC_IS15260-20150918_52_A3	Drosophila melanogaster	20x
IS15272	this paper	50H07-p65ADZp in attP40; MKRS/TM6B_59C09-ZpGdbd in attP2	20150918_52_C3	rubing_dolanm_is_screen_review	UAS_Chrimson_Venus_X_0070	A01	Fri Oct 02 15:22:48 EDT 2015	112413	Fly Light	Sample#2189903867943059554	f		screen	Terra Incognita	Michael-John Dolan	JRC_IS15272-20150918_52_C3	Drosophila melanogaster	20x
IS15273	this paper	54G12-p65ADZp in attP40; MKRS/TM6B_24C08-ZpGdbd in attP2	20160129_52_B5	rubing_dolanm_is_screen_review	UAS_Chrimson_Venus_X_0070	A00	Thu Feb 18 13:33:06 EST 2016	120964	Fly Light	Sample#2240263272504754274	f		screen	Terra Incognita	Michael-John Dolan	JRC_IS15273-20160129_52_B5	Drosophila melanogaster	20x
IS15276	this paper	55C05-p65ADZp in attP40_HAV5; CyO/Sco; 47B01-ZpGDBD in attP2	20150918_52_A4	rubing_dolanm_is_screen_review	UAS_Chrimson_Venus_X_0070	A01	Fri Oct 02 15:22:47 EDT 2015	112404	Fly Light	Sample#2189903861626437730	f		screen	Terra Incognita	Michael-John Dolan	JRC_IS15276-20150918_52_A4	Drosophila melanogaster	20x
IS15431	this paper	22D03-p65ADZp in attP40_48H01-ZpGdbd in attP2	20201204_43_F1	schretterc_is_screen_review	UAS_Chrimson_Venus_X_0070	A01	Fri Jan 08 09:15:38 EST 2021	218327	Fly Light	Sample#2887423209286664231	f		screen	Rubin	Katie Schretter	JRC_IS15431-20201204_43_F1	Drosophila melanogaster	20x
IS15441	this paper	94D12-p65ADZp in attP40_48H01-ZpGdbd in attP2	20160519_51_B4	rubing_itom10_is_screen_review	UAS_Chrimson_Venus_X_0070	A	Mon Jun 06 15:54:06 EDT 2016	127424	Fly Light	Sample#2279783934155817058	f		screen	Terra Incognita	Masayoshi Ito	JRC_IS15441-20160519_51_B4	Drosophila melanogaster	20x
IS15473	this paper	72H06-p65ADZp in attP40_22E12-ZpGdbd in attP2	20170310_52_B1	goldammerj_is_screen_review	UAS_Chrimson_Venus_X_0070	A	Thu Mar 30 17:34:43 EDT 2017	147730	Fly Light	Sample#2387438453982756962	f		screen	Terra Incognita	Jens Goldammer	JRC_IS15473-20170310_52_B1	Drosophila melanogaster	20x
IS15515	this paper	71F06-p65ADZp in attP40_VT040010-ZpGDBD in attP2	20210326_45_E6	nerna_is_screen_review	UAS_Chrimson_Venus_X_0070	A01	Thu Apr 15 14:49:43 EDT 2021	224265	Fly Light	Sample#2922643807310708834	f		screen	Rubin	Aljoscha Nern	JRC_IS15515-20210326_45_E6	Drosophila melanogaster	20x
IS15578	this paper	50H07-p65ADZp in attP40; MKRS/TM6B_13F12-ZpGdbd in attP2	20210115_41_B6	rubing_wolfft_is_screen_review	UAS_Chrimson_Venus_X_0070	A01	Fri Jan 29 13:50:07 EST 2021	220064	Fly Light	Sample#2895102427889926242	f		screen	Rubin	Tanya Wolff	JRC_IS15578-20210115_41_B6	Drosophila melanogaster	20x
IS15614	this paper	VT008142-p65ADZ in attP40_71D01-ZpGdbd in attP2	20170407_42_B4	nerna_is_screen_review	UAS_Chrimson_Venus_X_0070	A01	Fri Apr 28 15:16:17 EDT 2017	149115	Fly Light	Sample#2397912861335617634	f		screen	Rubin	Aljoscha Nern	JRC_IS15614-20170407_42_B4	Drosophila melanogaster	20x
IS15658	this paper	72D06-p65ADZp in attP40_69A01-ZpGdbd in attP2	20170714_41_A5	rubing_wolfft_is_screen_review	UAS_Chrimson_Venus_X_0070	A01	Tue Aug 01 14:20:52 EDT 2017	155526	Fly Light	Sample#2432325763073048674	f		screen	Rubin	Tanya Wolff	JRC_IS15658-20170714_41_A5	Drosophila melanogaster	20x
IS15659	this paper	72D06-p65ADZp in attP40_72B07-ZpGdbd in attP2	20210115_43_B5	rubing_wolfft_is_screen_review	UAS_Chrimson_Venus_X_0070	A01	Wed Feb 03 14:03:05 EST 2021	220022	Fly Light	Sample#2896917632529727586	f		screen	Rubin	Tanya Wolff	JRC_IS15659-20210115_43_B5	Drosophila melanogaster	20x
IS15698	this paper	VT029517-p65ADZ in attP40_72B05-ZpGdbd in attP2	20170421_51_A4	goldammerj_is_screen_review	UAS_Chrimson_Venus_X_0070	A	Fri May 12 17:56:50 EDT 2017	150698	Fly Light	Sample#2403026696463712354	f		screen	Terra Incognita	Jens Goldammer	JRC_IS15698-20170421_51_A4	Drosophila melanogaster	20x
IS15725	this paper	VT033636-p65ADZp in attP40_VT019345-ZpGdbd in attP2	20210716_45_B2	ditp_is_screen_review	UAS_Chrimson_Venus_X_0070	A01	Fri Jul 30 14:24:11 EDT 2021	232115	Fly Light	Sample#2961050494983733346	f		screen	Descending Interneuron	Shigehiro Namiki	JRC_IS15725-20210716_45_B2	Drosophila melanogaster	20x
IS15725	this paper	VT033636-p65ADZp in attP40_VT019345-ZpGdbd in attP2	20161014_54_A2	sterneg_is_screen_review	UAS_Chrimson_Venus_X_0070	A00	Thu Nov 03 18:05:57 EDT 2016	137484	Fly Light	Sample#2334175296376275018	f		screen	Terra Incognita	Gabriella Sterne	JRC_IS15725-20161014_54_A2	Drosophila melanogaster	20x
IS15833	this paper	22A02-p65ADZp in attP40_VT043158-ZpGdbd in attP2	20210423_41_J6	nerna_is_screen_review	UAS_Chrimson_Venus_X_0070	A01	Mon May 17 15:08:13 EDT 2021	226152	Fly Light	Sample#2934244873202565218	f		screen	Rubin	Aljoscha Nern	JRC_IS15833-20210423_41_J6	Drosophila melanogaster	20x
IS15850	this paper	w; 72B05-p65ADZ; MKRS/TM6B_VT029517-ZpGdbd in attP2	20170421_51_B1	goldammerj_is_screen_review	UAS_Chrimson_Venus_X_0070	A	Fri May 12 17:56:50 EDT 2017	150718	Fly Light	Sample#2403026696883142754	f		screen	Terra Incognita	Jens Goldammer	JRC_IS15850-20170421_51_B1	Drosophila melanogaster	20x
IS15896	this paper	w; 76E09-p65ADZ; MKRS/TM6B_VT030307-ZpGdbd in attP2	20170428_44_A1	nerna_is_screen_review	UAS_Chrimson_Venus_X_0070	A01	Mon Jun 12 16:19:16 EDT 2017	150542	Fly Light	Sample#2414236168372617314	f		screen	Rubin	Aljoscha Nern	JRC_IS15896-20170428_44_A1	Drosophila melanogaster	20x
IS15897	this paper	w; 76E09-p65ADZ; MKRS/TM6B_VT028450-ZpGdbd in attP2	20170428_42_H2	nerna_is_screen_review	UAS_Chrimson_Venus_X_0070	A01	Wed Jun 07 15:11:03 EDT 2017	150543	Fly Light	Sample#2412407060206452834	f		screen	Rubin	Aljoscha Nern	JRC_IS15897-20170428_42_H2	Drosophila melanogaster	20x
IS15979	this paper	VT008650-p65ADZp in attP40_VT026761-ZpGdbd in attP2	20170721_41_G3	asoy_is_screen_review	UAS_Chrimson_Venus_X_0070	A01	Thu Jan 11 20:30:06 EST 2018	155849	Fly Light	Sample#2491503005531111522	f		screen	Rubin	Yoshi Aso	JRC_IS15979-20170721_41_G3	Drosophila melanogaster	20x
IS15980	this paper	VT008650-p65ADZp in attP40_VT044178-ZpGdbd in attP2	20170721_41_G2	asoy_is_screen_review	UAS_Chrimson_Venus_X_0070	A01	Thu Jan 11 20:30:06 EST 2018	155851	Fly Light	Sample#2491503005472391266	f		screen	Rubin	Yoshi Aso	JRC_IS15980-20170721_41_G2	Drosophila melanogaster	20x
IS15981	this paper	VT008650-p65ADZp in attP40_VT050649-ZpGdbd in attP2	20170721_41_F6	asoy_is_screen_review	UAS_Chrimson_Venus_X_0070	A01	Thu Jan 11 20:30:06 EST 2018	155853	Fly Light	Sample#2491503005359145058	f		screen	Rubin	Yoshi Aso	JRC_IS15981-20170721_41_F6	Drosophila melanogaster	20x
IS16000	this paper	VT044178-p65ADZp in attP40_VT050649-ZpGdbd in attP2	20170721_41_F2	asoy_is_screen_review	UAS_Chrimson_Venus_X_0070	A01	Thu Jan 11 20:30:06 EST 2018	155863	Fly Light	Sample#2491503005128458338	f		screen	Rubin	Yoshi Aso	JRC_IS16000-20170721_41_F2	Drosophila melanogaster	20x
IS16004	this paper	VT050649-p65ADZp in attP40_VT044178-ZpGdbd in attP2	20170714_45_E1	asoy_is_screen_review	UAS_Chrimson_Venus_X_0070	A01	Tue Jan 16 14:27:51 EST 2018	155591	Fly Light	Sample#2493223783628800098	f		screen	Rubin	Yoshi Aso	JRC_IS16004-20170714_45_E1	Drosophila melanogaster	20x
IS16058	this paper	65H10-p65ADZp in attP40; MKRS/TM6B_33F04-ZpGDBD in attP2	20170331_51_I5	rubing_itom10_is_screen_review	UAS_Chrimson_Venus_X_0070	A	Tue Apr 18 17:05:13 EDT 2017	149405	Fly Light	Sample#2394316399624323170	f		screen	Terra Incognita	Masayoshi Ito	JRC_IS16058-20170331_51_I5	Drosophila melanogaster	20x
IS16163	this paper	VT050229-p65ADZp in attP40_VT013596-ZpGDBD in attP2	20160513_51_B4	goldammerj_is_screen_review	UAS_Chrimson_Venus_X_0070	A00	Wed Jun 01 09:49:28 EDT 2016	127067	Fly Light	Sample#2277880230259458085	f		screen	Terra Incognita	Jens Goldammer	JRC_IS16163-20160513_51_B4	Drosophila melanogaster	20x
IS16315	this paper	11B07-p65ADZp in attP40; MKRS/TM6B_65C07-ZpGDBD in attP2	20150918_52_D4	rubing_dolanm_is_screen_review	UAS_Chrimson_Venus_X_0070	A01	Fri Oct 02 15:22:49 EDT 2015	112422	Fly Light	Sample#2189903869914382434	f		screen	Terra Incognita	Michael-John Dolan	JRC_IS16315-20150918_52_D4	Drosophila melanogaster	20x
IS16317	this paper	11E08-p65ADZp in attP40_94F11-ZpGdbd in attP2	20150918_52_C4	rubing_dolanm_is_screen_review	UAS_Chrimson_Venus_X_0070	A01	Fri Oct 02 15:22:48 EDT 2015	112417	Fly Light	Sample#2189903868249243746	f		screen	Terra Incognita	Michael-John Dolan	JRC_IS16317-20150918_52_C4	Drosophila melanogaster	20x
IS16325	this paper	20G10-p65ADZp in attP40_41H07-ZpGDBD in attP2	20150918_52_B5	rubing_dolanm_is_screen_review	UAS_Chrimson_Venus_X_0070	A01	Fri Oct 02 15:22:48 EDT 2015	112410	Fly Light	Sample#2189903866898677858	f		screen	Terra Incognita	Michael-John Dolan	JRC_IS16325-20150918_52_B5	Drosophila melanogaster	20x
IS16329	this paper	24C08-p65ADZp in attP40; MKRS/TM6B_94F11-ZpGdbd in attP2	20150918_52_B2	rubing_dolanm_is_screen_review	UAS_Chrimson_Venus_X_0070	A01	Fri Oct 02 15:22:47 EDT 2015	112407	Fly Light	Sample#2189903862591127650	f		screen	Terra Incognita	Michael-John Dolan	JRC_IS16329-20150918_52_B2	Drosophila melanogaster	20x
IS16364	this paper	53A03-p65ADZp in attP40_30A10-ZpGDBD in attP2	20150918_52_C1	rubing_dolanm_is_screen_review	UAS_Chrimson_Venus_X_0070	A01	Fri Oct 02 15:22:48 EDT 2015	112411	Fly Light	Sample#2189903867355856994	f		screen	Terra Incognita	Michael-John Dolan	JRC_IS16364-20150918_52_C1	Drosophila melanogaster	20x
IS16366	this paper	54G12-p65ADZp in attP40; MKRS/TM6B_94F11-ZpGdbd in attP2	20150918_52_D2	rubing_dolanm_is_screen_review	UAS_Chrimson_Venus_X_0070	A01	Fri Oct 02 15:22:48 EDT 2015	112420	Fly Light	Sample#2189903869272653922	f		screen	Terra Incognita	Michael-John Dolan	JRC_IS16366-20150918_52_D2	Drosophila melanogaster	20x
IS16373	this paper	76E07-p65ADZp in attP40_53D01-ZpGdbd in attP2	20150918_52_D5	rubing_dolanm_is_screen_review	UAS_Chrimson_Venus_X_0070	A01	Fri Oct 02 15:22:49 EDT 2015	112423	Fly Light	Sample#2189903870199595106	f		screen	Terra Incognita	Michael-John Dolan	JRC_IS16373-20150918_52_D5	Drosophila melanogaster	20x
IS16374	this paper	82F03-p65ADZp in attP40_65G08-ZpGDBD in attP2	20160916_52_A5	mckellarc_is_screen_review	UAS_Chrimson_Venus_X_0070	A00	Mon Oct 03 16:12:43 EDT 2016	135222	Fly Light	Sample#2322912777053667473	f		screen	Dickson	Claire McKellar	JRC_IS16374-20160916_52_A5	Drosophila melanogaster	20x
IS16377	this paper	85A07-p65ADZp in attP40_59C09-ZpGdbd in attP2	20150918_52_B4	rubing_dolanm_is_screen_review	UAS_Chrimson_Venus_X_0070	A01	Fri Oct 02 15:22:47 EDT 2015	112409	Fly Light	Sample#2189903863232856162	f		screen	Terra Incognita	Michael-John Dolan	JRC_IS16377-20150918_52_B4	Drosophila melanogaster	20x
IS16486	this paper	VT040747-p65ADZp in attP40_12G09-ZpGdbd in attP2	20210806_50_E5	minegishir_is_screen_review	UAS_Chrimson_Venus_X_0070	A01	Mon Aug 30 13:23:14 EDT 2021	233765	Fly Light	Sample#2972269177785548898	f		screen	Dickson	Ryo Minegishi	JRC_IS16486-20210806_50_E5	Drosophila melanogaster	20x
IS16507	this paper	12G09-p65ADZp in attP40_VT040747-ZpGDBD in attP2	20210806_49_C2	minegishir_is_screen_review	UAS_Chrimson_Venus_X_0070	A01	Mon Aug 30 13:37:00 EDT 2021	233599	Fly Light	Sample#2972272645459935330	f		screen	Dickson	Ryo Minegishi	JRC_IS16507-20210806_49_C2	Drosophila melanogaster	20x
IS16520	this paper	VT046799-p65ADZp in attP40_VT023749-ZpGDBD in attP2	20200214_47_D6	ditp_is_screen_review	UAS_Chrimson_Venus_X_0070	A01	Tue Mar 03 18:19:32 EST 2020	207992	Fly Light	Sample#2774857457233559650	f		screen	Descending Interneuron	Shigehiro Namiki	JRC_IS16520-20200214_47_D6	Drosophila melanogaster	20x
IS16546	this paper	11E08-p65ADZp in attP40_25B07-ZpGdbd in attP2	20151113_53_H2	rubing_dolanm_is_screen_review	UAS_Chrimson_Venus_X_0070	A01	Wed Dec 09 12:32:18 EST 2015	116901	Fly Light	Sample#2214518433360379941	f		screen	Terra Incognita	Michael-John Dolan	JRC_IS16546-20151113_53_H2	Drosophila melanogaster	20x
IS16638	this paper	VT008882-p65ADZp in attP40_VT060202-ZpGDBD in attP2	20170210_52_A1	rubing_itom10_is_screen_review	UAS_Chrimson_Venus_X_0070	A	Wed Mar 08 14:05:08 EST 2017	145142	Fly Light	Sample#2379428275370852450	f		screen	Terra Incognita	Masayoshi Ito	JRC_IS16638-20170210_52_A1	Drosophila melanogaster	20x
IS16725	this paper	VT005404-p65ADZp in attP40_VT045670-ZpGDBD in attP2	20170818_42_A1	wangk11_is_screen_review	UAS_Chrimson_Venus_X_0070	A01	Tue Sep 05 15:03:04 EDT 2017	157301	Fly Light	Sample#2445019959202414690	m		screen	Dickson	Kaiyu Wang	JRC_IS16725-20170818_42_A1	Drosophila melanogaster	20x
IS16745	this paper	VT044326-p65ADZp in attP40_VT019841-ZpGDBD in attP2	20201002_41_B5	nerna_is_screen_review	UAS_Chrimson_Venus_X_0070	A01	Mon Oct 19 18:12:09 EDT 2020	214251	Fly Light	Sample#2858189709752926306	f		screen	Rubin	Aljoscha Nern	JRC_IS16745-20201002_41_B5	Drosophila melanogaster	20x
IS16751	this paper	VT044326-p65ADZp in attP40_VT050384-ZpGDBD in attP2	20201002_41_G2	nerna_is_screen_review	UAS_Chrimson_Venus_X_0070	A01	Mon Oct 19 17:54:38 EDT 2020	214252	Fly Light	Sample#2858185300495040610	f		screen	Rubin	Aljoscha Nern	JRC_IS16751-20201002_41_G2	Drosophila melanogaster	20x
IS16781	this paper	49H05-p65ADZp in attP40_41H07-ZpGDBD in attP2	20170331_51_G6	rubing_itom10_is_screen_review	UAS_Chrimson_Venus_X_0070	A	Tue Apr 18 17:05:13 EDT 2017	149393	Fly Light	Sample#2394316398303117410	f		screen	Terra Incognita	Masayoshi Ito	JRC_IS16781-20170331_51_G6	Drosophila melanogaster	20x
IS16827	this paper	VT008424-p65ADZp in attP40_VT008424-ZpGdbd in attP2	20170106_42_D3	dicksonb_is_screen_review	HAV5_X_0083	A01	Wed Jan 25 09:04:44 EST 2017	142822	Fly Light	Sample#2364132384930005090	m		screen	Dickson	Ryo Minegishi	JRC_IS16827-20170106_42_D3	Drosophila melanogaster	20x
IS16827	this paper	VT008424-p65ADZp in attP40_VT008424-ZpGdbd in attP2	20151125_41_B1	nerna_is_screen_review	HAV5_X_0083	A01	Fri Dec 11 11:31:42 EST 2015	116769	Fly Light	Sample#2215227961378865189	f		screen	Rubin	Aljoscha Nern	JRC_IS16827-20151125_41_B1	Drosophila melanogaster	20x
IS16839	this paper	VT016996-p65ADZp in attP40_49H08-ZpGdbd in attP2	20210604_43_C3	nerna_is_screen_review	UAS_Chrimson_Venus_X_0070	A01	Thu Jun 17 15:56:43 EDT 2021	229550	Fly Light	Sample#2945491104423739490	f		screen	Rubin	Aljoscha Nern	JRC_IS16839-20210604_43_C3	Drosophila melanogaster	20x
IS16878	this paper	VT038873-p65ADZ in attP40_VT038873-ZpGdbd in attP2	20170428_41_E6	rubing_wolfft_is_screen_review	UAS_Chrimson_Venus_X_0070	A01	Fri May 19 09:41:41 EDT 2017	150544	Fly Light	Sample#2405438803645825122	f		screen	Rubin	Tanya Wolff	JRC_IS16878-20170428_41_E6	Drosophila melanogaster	20x
IS16969	this paper	VT010661-p65ADZp in attP40_23E12-ZpGdbd in attP2/ TM3	20170224_43_A1	rubing_wolfft_is_screen_review	UAS_Chrimson_Venus_X_0070	A01	Fri Mar 10 16:25:22 EST 2017	145802	Fly Light	Sample#2380188340948303970	f		screen	Rubin	Tanya Wolff	JRC_IS16969-20170224_43_A1	Drosophila melanogaster	20x
IS17020	this paper	10E07-p65ADZp in attP40; MKRS/TM6B_VT013616-ZpGDBD in attP2	20170428_41_E5	rubing_wolfft_is_screen_review	UAS_Chrimson_Venus_X_0070	A01	Fri May 19 09:41:41 EDT 2017	150545	Fly Light	Sample#2405438803528384610	f		screen	Rubin	Tanya Wolff	JRC_IS17020-20170428_41_E5	Drosophila melanogaster	20x
IS17045	this paper	VT042758-p65ADZ in attP40_VT008424-ZpGdbd in attP2	20210528_45_D3	asoy_is_screen_review	UAS_Chrimson_Venus_X_0070	A01	Mon Jul 26 14:58:41 EDT 2021	228408	Fly Light	Sample#2959609625655115874	f		screen	Aso	Yoshi Aso	JRC_IS17045-20210528_45_D3	Drosophila melanogaster	20x
IS17048	this paper	41G11-p65ADZp in attP40_72G06-ZpGdbd in attP2	20210423_44_A2	minegishir_is_screen_review	UAS_Chrimson_Venus_X_0070	A01	Fri May 07 16:01:09 EDT 2021	225879	Fly Light	Sample#2930634314284531810	f		screen	Dickson	Ryo Minegishi	JRC_IS17048-20210423_44_A2	Drosophila melanogaster	20x
IS17068	this paper	VT000605-p65ADZp in attP40_VT015970-ZpGdbd in attP2	20170901_51_F5	rubing_itom10_is_screen_review	UAS_Chrimson_Venus_X_0070	A	Thu Sep 21 09:55:21 EDT 2017	159054	Fly Light	Sample#2450740725206220898	f		screen	Terra Incognita	Masayoshi Ito	JRC_IS17068-20170901_51_F5	Drosophila melanogaster	20x
IS17076	this paper	VT008997-p65ADZp in attP40_VT030322-ZpGdbd in attP2	20210226_43_A6	nerna_is_screen_review	UAS_Chrimson_Venus_X_0070	A01	Mon Mar 15 15:51:13 EDT 2021	222555	Fly Light	Sample#2911425258974085218	f		screen	Rubin	Aljoscha Nern	JRC_IS17076-20210226_43_A6	Drosophila melanogaster	20x
IS17084	this paper	VT030322-p65ADZ in attP40_VT008997-ZpGdbd in attP2	20210226_43_B3	nerna_is_screen_review	UAS_Chrimson_Venus_X_0070	A01	Mon Mar 15 15:51:13 EDT 2021	222558	Fly Light	Sample#2911425259695505506	f		screen	Rubin	Aljoscha Nern	JRC_IS17084-20210226_43_B3	Drosophila melanogaster	20x
IS17146	this paper	49C05-p65ADZp in attP40; MKRS/TM6B_HAV5; CyO/Sco; 18B11-ZpGDBD in attP2	20170428_42_I1	nerna_is_screen_review	UAS_Chrimson_Venus_X_0070	A01	Wed Jun 07 15:11:03 EDT 2017	150541	Fly Light	Sample#2412407060449722466	f		screen	Rubin	Aljoscha Nern	JRC_IS17146-20170428_42_I1	Drosophila melanogaster	20x
IS17149	this paper	49C05-p65ADZp in attP40; MKRS/TM6B_49C05-ZpGdbd in attP2	20161223_44_E4	nerna_is_screen_review	UAS_Chrimson_Venus_X_0070	A01	Tue Jan 24 09:00:01 EST 2017	141803	Fly Light	Sample#2363768810000875618	f		screen	Rubin	Aljoscha Nern	JRC_IS17149-20161223_44_E4	Drosophila melanogaster	20x
IS17186	this paper	49C05-p65ADZp in attP40; MKRS/TM6B_VT019841-ZpGDBD in attP2	20170407_42_A1	nerna_is_screen_review	UAS_Chrimson_Venus_X_0070	A01	Fri Apr 28 15:16:16 EDT 2017	149117	Fly Light	Sample#2397912860198961250	f		screen	Rubin	Aljoscha Nern	JRC_IS17186-20170407_42_A1	Drosophila melanogaster	20x
IS17187	this paper	49C05-p65ADZp in attP40; MKRS/TM6B_VT026669-ZpGDBD in attP2	20170407_42_A2	nerna_is_screen_review	UAS_Chrimson_Venus_X_0070	A01	Fri Apr 28 15:16:16 EDT 2017	149118	Fly Light	Sample#2397912860341567586	f		screen	Rubin	Aljoscha Nern	JRC_IS17187-20170407_42_A2	Drosophila melanogaster	20x
IS17188	this paper	49C05-p65ADZp in attP40; MKRS/TM6B_VT050229-ZpGDBD in attP2	20170407_42_A3	nerna_is_screen_review	UAS_Chrimson_Venus_X_0070	A01	Fri Apr 28 15:16:17 EDT 2017	149119	Fly Light	Sample#2397912860484173922	f		screen	Rubin	Aljoscha Nern	JRC_IS17188-20170407_42_A3	Drosophila melanogaster	20x
IS17191	this paper	49C05-p65ADZp in attP40; MKRS/TM6B_VT043781-ZpGdbd in attP2	20170407_42_A4	nerna_is_screen_review	UAS_Chrimson_Venus_X_0070	A01	Fri Apr 28 15:16:17 EDT 2017	149120	Fly Light	Sample#2397912860626780258	f		screen	Rubin	Aljoscha Nern	JRC_IS17191-20170407_42_A4	Drosophila melanogaster	20x
IS17192	this paper	49C05-p65ADZp in attP40; MKRS/TM6B_VT050384-ZpGDBD in attP2	20170407_42_A5	nerna_is_screen_review	UAS_Chrimson_Venus_X_0070	A01	Fri Apr 28 15:16:17 EDT 2017	149121	Fly Light	Sample#2397912860769386594	f		screen	Rubin	Aljoscha Nern	JRC_IS17192-20170407_42_A5	Drosophila melanogaster	20x
IS17195	this paper	49C05-p65ADZp in attP40; MKRS/TM6B_VT005002-ZpGdbd in attP2	20170407_42_B2	nerna_is_screen_review	UAS_Chrimson_Venus_X_0070	A01	Fri Apr 28 15:16:17 EDT 2017	149122	Fly Light	Sample#2397912861054599266	f		screen	Rubin	Aljoscha Nern	JRC_IS17195-20170407_42_B2	Drosophila melanogaster	20x
IS17240	this paper	71D01-p65ADZp in attP40; MKRS/TM6B_26D09-ZpGdbd in attP2	20170224_41_F1	nerna_is_screen_review	UAS_Chrimson_Venus_X_0070	A01	Fri Mar 31 18:06:18 EDT 2017	145794	Fly Light	Sample#2387808789752447074	f		screen	Rubin	Aljoscha Nern	JRC_IS17240-20170224_41_F1	Drosophila melanogaster	20x
IS17242	this paper	VT007394-p65ADZp in attP40_26D09-ZpGdbd in attP2	20170407_42_B3	nerna_is_screen_review	UAS_Chrimson_Venus_X_0070	A01	Fri Apr 28 15:16:17 EDT 2017	149113	Fly Light	Sample#2397912861193011298	f		screen	Rubin	Aljoscha Nern	JRC_IS17242-20170407_42_B3	Drosophila melanogaster	20x
IS17245	this paper	VT014712-p65ADZp in attP40_92G12-ZpGdbd in attP2	20170224_45_B3	nerna_is_screen_review	UAS_Chrimson_Venus_X_0070	A01	Wed Mar 29 16:26:39 EDT 2017	145730	Fly Light	Sample#2387058935061282914	f		screen	Rubin	Aljoscha Nern	JRC_IS17245-20170224_45_B3	Drosophila melanogaster	20x
IS17246	this paper	VT002033-p65ADZp in attP40_26D09-ZpGdbd in attP2	20170224_45_B4	nerna_is_screen_review	UAS_Chrimson_Venus_X_0070	A01	Wed Mar 29 16:26:39 EDT 2017	145739	Fly Light	Sample#2387058935224860770	f		screen	Rubin	Aljoscha Nern	JRC_IS17246-20170224_45_B4	Drosophila melanogaster	20x
IS17247	this paper	VT002033-p65ADZp in attP40_49A11-ZpGdbd in attP2	20201002_44_D4	rubing_is_screen_review	UAS_Chrimson_Venus_X_0070	A01	Thu Oct 22 15:11:10 EDT 2020	214326	Fly Light	Sample#2859231326983159906	f		screen	Rubin	Gerry Rubin	JRC_IS17247-20201002_44_D4	Drosophila melanogaster	20x
IS17250	this paper	VT008142-p65ADZ in attP40_26D09-ZpGdbd in attP2	20170224_41_A4	nerna_is_screen_review	UAS_Chrimson_Venus_X_0070	A01	Fri Mar 31 18:06:18 EDT 2017	145741	Fly Light	Sample#2387808786577358946	f		screen	Rubin	Aljoscha Nern	JRC_IS17250-20170224_41_A4	Drosophila melanogaster	20x
IS17251	this paper	VT037865-p65ADZp in attP40_26D09-ZpGdbd in attP2	20170224_45_D2	nerna_is_screen_review	UAS_Chrimson_Venus_X_0070	A01	Wed Mar 29 16:26:39 EDT 2017	145751	Fly Light	Sample#2387058936369905762	f		screen	Rubin	Aljoscha Nern	JRC_IS17251-20170224_45_D2	Drosophila melanogaster	20x
IS17252	this paper	VT037865-p65ADZp in attP40_71D01-ZpGdbd in attP2	20170224_45_C4	nerna_is_screen_review	UAS_Chrimson_Venus_X_0070	A01	Wed Mar 29 16:26:39 EDT 2017	145752	Fly Light	Sample#2387058936042750050	f		screen	Rubin	Aljoscha Nern	JRC_IS17252-20170224_45_C4	Drosophila melanogaster	20x
IS17273	this paper	VT002033-p65ADZp in attP40_VT037865-ZpGdbd in attP2	20170407_42_A6	nerna_is_screen_review	UAS_Chrimson_Venus_X_0070	A01	Fri Apr 28 15:16:17 EDT 2017	149114	Fly Light	Sample#2397912860911992930	f		screen	Rubin	Aljoscha Nern	JRC_IS17273-20170407_42_A6	Drosophila melanogaster	20x
IS17291	this paper	52F08-p65ADZp in attP40; MKRS/TM6B_HAV5; CyO/Sco; 67B01-ZpGDBD in attP2	20160429_52_A4	mckellarc_is_screen_review	HAV5_X_0083	A00	Mon May 23 15:39:21 EDT 2016	124192	Fly Light	Sample#2274706790144802914	f		screen	Terra Incognita	Christa Baker	JRC_IS17291-20160429_52_A4	Drosophila melanogaster	20x
IS17380	this paper	VT033636-p65ADZp in attP40_VT008650-ZpGDBD in attP2	20210716_42_F5	ditp_is_screen_review	UAS_Chrimson_Venus_X_0070	A01	Thu Jul 29 15:57:41 EDT 2021	232042	Fly Light	Sample#2960711636685422690	f		screen	Descending Interneuron	Shigehiro Namiki	JRC_IS17380-20210716_42_F5	Drosophila melanogaster	20x
IS17387	this paper	VT026341-p65ADZp in attP40_VT058695-ZpGdbd in attP2	20170217_41_D2	nerna_is_screen_review	UAS_Chrimson_Venus_X_0070	A01	Tue Mar 07 09:28:45 EST 2017	145276	Fly Light	Sample#2378996332716097634	f		screen	Rubin	Aljoscha Nern	JRC_IS17387-20170217_41_D2	Drosophila melanogaster	20x
IS17397	this paper	VT007747-p65ADZp in attP40_VT061709-ZpGDBD in attP2	20170217_41_B4	nerna_is_screen_review	UAS_Chrimson_Venus_X_0070	A01	Tue Mar 07 09:28:45 EST 2017	145277	Fly Light	Sample#2378996331524915298	f		screen	Rubin	Aljoscha Nern	JRC_IS17397-20170217_41_B4	Drosophila melanogaster	20x
IS17406	this paper	23B05-p65ADZp in attP40; MKRS/TM6B_22D03-ZpGdbd in attP2	20210319_44_I5	rubing_is_screen_review	UAS_Chrimson_Venus_X_0070	A01	Thu Apr 01 15:30:18 EDT 2021	223781	Fly Light	Sample#2917580589705986146	f		screen	Rubin	Gerry Rubin	JRC_IS17406-20210319_44_I5	Drosophila melanogaster	20x
IS17409	this paper	54D12-p65ADZp in attP40; MKRS/TM6B_69H11-ZpGdbd in attP2	20160318_43_A4	nerna_is_screen_review	HAV5_X_0083	A01	Tue Apr 05 07:33:53 EDT 2016	123170	Fly Light	Sample#2257190003299844133	f		screen	Rubin	Aljoscha Nern	JRC_IS17409-20160318_43_A4	Drosophila melanogaster	20x
IS17409	this paper	54D12-p65ADZp in attP40; MKRS/TM6B_69H11-ZpGdbd in attP2	20210226_47_D6	rubing_is_screen_review	UAS_Chrimson_Venus_X_0070	A01	Fri Mar 12 13:22:39 EST 2021	222293	Fly Light	Sample#2910315807709855842	f		screen	Rubin	Gerry Rubin	JRC_IS17409-20210226_47_D6	Drosophila melanogaster	20x
IS17419	this paper	VT059225-p65ADZp in attP40_58F07-ZpGdbd in attP2	20170331_51_H6	rubing_itom10_is_screen_review	UAS_Chrimson_Venus_X_0070	A	Tue Apr 18 17:05:13 EDT 2017	149372	Fly Light	Sample#2394316398965817442	f		screen	Terra Incognita	Masayoshi Ito	JRC_IS17419-20170331_51_H6	Drosophila melanogaster	20x
IS17427	this paper	23B05-p65ADZp in attP40; MKRS/TM6B_VT050139-ZpGDBD in attP2	20210319_46_G6	rubing_is_screen_review	UAS_Chrimson_Venus_X_0070	A01	Fri Apr 02 13:56:42 EDT 2021	223534	Fly Light	Sample#2917919421987029090	f		screen	Rubin	Gerry Rubin	JRC_IS17427-20210319_46_G6	Drosophila melanogaster	20x
IS17440	this paper	54D12-p65ADZp in attP40; MKRS/TM6B_VT038119-ZpGdbd in attP2	20160401_44_I2	nerna_is_screen_review	UAS_Chrimson_Venus_X_0070	A01	Wed Apr 20 15:10:19 EDT 2016	123914	Fly Light	Sample#2262740685557858402	f		screen	Rubin	Aljoscha Nern	JRC_IS17440-20160401_44_I2	Drosophila melanogaster	20x
IS17444	this paper	69H11-p65ADZp in attP40_VT038119-ZpGdbd in attP2	20160401_44_I3	nerna_is_screen_review	UAS_Chrimson_Venus_X_0070	A01	Wed Apr 20 15:10:19 EDT 2016	123915	Fly Light	Sample#2262740686048591970	f		screen	Rubin	Aljoscha Nern	JRC_IS17444-20160401_44_I3	Drosophila melanogaster	20x
IS17459	this paper	VT008975-p65ADZp in attP40_VT043166-ZpGdbd in attP2	20151106_44_D2	nerna_is_screen_review	HAV5_X_0083	A01	Mon Nov 23 11:29:41 EST 2015	115119	Fly Light	Sample#2208704470445981794	f		screen	Rubin	Aljoscha Nern	JRC_IS17459-20151106_44_D2	Drosophila melanogaster	20x
IS17463	this paper	VT016127-p65ADZp in attP40_VT008975-ZpGDBD in attP2	20161216_52_C5	goldammerj_is_screen_review	UAS_Chrimson_Venus_X_0070	A00	Thu Jan 12 16:09:31 EST 2017	142233	Fly Light	Sample#2359528244564197474	f		screen	Terra Incognita	Jens Goldammer	JRC_IS17463-20161216_52_C5	Drosophila melanogaster	20x
IS17463	this paper	VT016127-p65ADZp in attP40_VT008975-ZpGDBD in attP2	20151120_45_A2	nerna_is_screen_review	HAV5_X_0083	A01	Fri Dec 11 11:31:24 EST 2015	116214	Fly Light	Sample#2215227882970546213	f		screen	Rubin	Aljoscha Nern	JRC_IS17463-20151120_45_A2	Drosophila melanogaster	20x
IS17486	this paper	VT023830-p65ADZp in attP40_VT043166-ZpGdbd in attP2	20160819_42_A1	dicksonb_is_screen_review	HAV5_X_0083	A01	Fri Sep 23 12:53:48 EDT 2016	132890	Fly Light	Sample#2319238838771253393	m		screen	Dickson	Barry Dickson	JRC_IS17486-20160819_42_A1	Drosophila melanogaster	20x
IS17494	this paper	VT050247-p65ADZp in attP40_VT037865-ZpGdbd in attP2	20160826_42_E5	nerna_is_screen_review	UAS_Chrimson_Venus_X_0070	A01	Wed Sep 14 14:54:39 EDT 2016	133231	Fly Light	Sample#2316007759121744017	f		screen	Rubin	Aljoscha Nern	JRC_IS17494-20160826_42_E5	Drosophila melanogaster	20x
IS17507	this paper	VT059225-p65ADZp in attP40_22D03-ZpGdbd in attP2	20210108_41_D1	rubing_wolfft_is_screen_review	UAS_Chrimson_Venus_X_0070	A01	Fri Jan 29 13:39:36 EST 2021	219541	Fly Light	Sample#2895099782684999778	f		screen	Rubin	Tanya Wolff	JRC_IS17507-20210108_41_D1	Drosophila melanogaster	20x
IS17510	this paper	VT059225-p65ADZp in attP40_89G07-ZpGdbd in attP2/ TM3	20210326_45_J1	nerna_is_screen_review	UAS_Chrimson_Venus_X_0070	A01	Thu Apr 15 14:49:45 EDT 2021	224329	Fly Light	Sample#2922643812935270498	f		screen	Rubin	Aljoscha Nern	JRC_IS17510-20210326_45_J1	Drosophila melanogaster	20x
IS17537	this paper	VT059225-p65ADZp in attP40_VT002015-ZpGDBD in attP2	20160129_45_A5	dicksonb_is_screen_review	HAV5_X_0083	A01	Thu Feb 18 07:32:05 EST 2016	120519	Fly Light	Sample#2240172420788912165	m		screen	Dickson	Barry Dickson	JRC_IS17537-20160129_45_A5	Drosophila melanogaster	20x
IS17559	this paper	20A03-p65ADZp in attP40_72A10-ZpGDBD in attP2	20210507_47_B4	wangk11_is_screen_review	UAS_Chrimson_Venus_X_0070	A01	Fri May 21 16:24:08 EDT 2021	227010	Fly Light	Sample#2935713529023430754	f		screen	Dickson	Kaiyu Wang	JRC_IS17559-20210507_47_B4	Drosophila melanogaster	20x
IS17582	this paper	VT058563-p65ADZp in attP40_14E09-ZpGdbd in attP2	20210402_43_D5	nerna_is_screen_review	UAS_Chrimson_Venus_X_0070	A01	Wed Apr 14 17:05:57 EDT 2021	224834	Fly Light	Sample#2922315704197709922	f		screen	Rubin	Aljoscha Nern	JRC_IS17582-20210402_43_D5	Drosophila melanogaster	20x
IS17623	this paper	22D03-p65ADZp in attP40_VT049362-ZpGdbd in attP2	20210521_43_H6	schretterc_is_screen_review	UAS_Chrimson_Venus_X_0070	A01	Fri Jun 04 13:11:08 EDT 2021	228196	Fly Light	Sample#2940738391240605794	f		screen	Rubin	Katie Schretter	JRC_IS17623-20210521_43_H6	Drosophila melanogaster	20x
IS17626	this paper	22D12-p65ADZp in attP40_VT002015-ZpGDBD in attP2	20170224_41_D2	nerna_is_screen_review	UAS_Chrimson_Venus_X_0070	A01	Mon Apr 10 08:59:24 EDT 2017	145783	Fly Light	Sample#2391295036324053090	f		screen	Rubin	Aljoscha Nern	JRC_IS17626-20170224_41_D2	Drosophila melanogaster	20x
IS17638	this paper	30E08-p65ADZp in attP40/ CyO_VT050246-ZpGdbd in attP2	20210310_42_A5	nerna_is_screen_review	UAS_Chrimson_Venus_X_0070	A01	Wed Apr 14 17:15:26 EDT 2021	223073	Fly Light	Sample#2922318088391098466	f		screen	Rubin	Aljoscha Nern	JRC_IS17638-20210310_42_A5	Drosophila melanogaster	20x
IS17656	this paper	VT014013-p65ADZp in attP40_VT002015-ZpGDBD in attP2	20170224_45_A1	nerna_is_screen_review	UAS_Chrimson_Venus_X_0070	A01	Wed Mar 29 16:26:39 EDT 2017	145757	Fly Light	Sample#2387058933895266402	f		screen	Rubin	Aljoscha Nern	JRC_IS17656-20170224_45_A1	Drosophila melanogaster	20x
IS17674	this paper	w; 31C03-p65ADZp; MKRS/ TM6B_56B05-ZpGdbd in attP2	20150814_43_B5	nerna_is_screen_review	HAV5_X_0083	A01	Fri Sep 04 09:37:25 EDT 2015	109562	Fly Light	Sample#2179670087798095970	f		screen	Rubin	Aljoscha Nern	JRC_IS17674-20150814_43_B5	Drosophila melanogaster	20x
IS17676	this paper	42B05-p65ADZp in attP40_22D12-ZpGdbd in attP2	20150814_42_D3	nerna_is_screen_review	HAV5_X_0083	A01	Tue Sep 01 14:44:18 EDT 2015	109571	Fly Light	Sample#2178660153803407458	f		screen	Rubin	Aljoscha Nern	JRC_IS17676-20150814_42_D3	Drosophila melanogaster	20x
IS17678	this paper	42B05-p65ADZp in attP40_44H01-ZpGdbd in attP2	20150814_42_D1	nerna_is_screen_review	HAV5_X_0083	A01	Tue Sep 01 14:44:18 EDT 2015	109573	Fly Light	Sample#2178660153392365666	f		screen	Rubin	Aljoscha Nern	JRC_IS17678-20150814_42_D1	Drosophila melanogaster	20x
IS17682	this paper	45F05-p65ADZp in attP40_89G07-ZpGdbd in attP2/ TM3	20150814_41_B3	nerna_is_screen_review	HAV5_X_0083	A01	Fri Sep 04 09:37:23 EDT 2015	109580	Fly Light	Sample#2179670081615691874	f		screen	Rubin	Aljoscha Nern	JRC_IS17682-20150814_41_B3	Drosophila melanogaster	20x
IS17685	this paper	46H03-p65ADZp in attP40_94F11-ZpGdbd in attP2	20150814_43_B3	nerna_is_screen_review	HAV5_X_0083	A01	Fri Sep 04 09:37:25 EDT 2015	109585	Fly Light	Sample#2179670087508688994	f		screen	Rubin	Aljoscha Nern	JRC_IS17685-20150814_43_B3	Drosophila melanogaster	20x
IS17686	this paper	w; 49C08-p65ADZp; MKRS/ TM6B_85H06-ZpGdbd in attP2	20150814_44_A3	nerna_is_screen_review	HAV5_X_0083	A01	Fri Sep 04 09:37:25 EDT 2015	109589	Fly Light	Sample#2179670090377592930	f		screen	Rubin	Aljoscha Nern	JRC_IS17686-20150814_44_A3	Drosophila melanogaster	20x
IS17687	this paper	w; 49E07-p65ADZp; MKRS/ TM6B_41C05-ZpGdbd in attP2	20150814_43_C2	nerna_is_screen_review	HAV5_X_0083	A01	Fri Sep 04 09:37:25 EDT 2015	109590	Fly Light	Sample#2179670088083308642	f		screen	Rubin	Aljoscha Nern	JRC_IS17687-20150814_43_C2	Drosophila melanogaster	20x
IS17688	this paper	w; 49E07-p65ADZp; MKRS/ TM6B_85F11-ZpGdbd in attP2	20150814_42_C4	nerna_is_screen_review	HAV5_X_0083	A01	Tue Sep 01 14:44:17 EDT 2015	109591	Fly Light	Sample#2178660152104714338	f		screen	Rubin	Aljoscha Nern	JRC_IS17688-20150814_42_C4	Drosophila melanogaster	20x
IS17689	this paper	50C03-p65ADZp in attP40; MKRS/TM6B_41C05-ZpGdbd in attP2	20150814_43_D6	nerna_is_screen_review	HAV5_X_0083	A01	Fri Sep 04 09:37:25 EDT 2015	109592	Fly Light	Sample#2179670088964112482	f		screen	Rubin	Aljoscha Nern	JRC_IS17689-20150814_43_D6	Drosophila melanogaster	20x
IS17690	this paper	50C03-p65ADZp in attP40; MKRS/TM6B_85F11-ZpGdbd in attP2	20150814_42_C3	nerna_is_screen_review	HAV5_X_0083	A01	Tue Sep 01 14:44:17 EDT 2015	109593	Fly Light	Sample#2178660151668506722	f		screen	Rubin	Aljoscha Nern	JRC_IS17690-20150814_42_C3	Drosophila melanogaster	20x
IS17694	this paper	55C04-p65ADZp in attP40_50C03-ZpGdbd in attP2	20150814_44_G2	nerna_is_screen_review	HAV5_X_0083	A01	Fri Sep 04 09:37:26 EDT 2015	109605	Fly Light	Sample#2179670093728841826	f		screen	Rubin	Aljoscha Nern	JRC_IS17694-20150814_44_G2	Drosophila melanogaster	20x
IS17696	this paper	55C09-p65ADZp in VK00027_72G03-ZpGdbd in attP2	20150814_41_B4	nerna_is_screen_review	HAV5_X_0083	A01	Fri Sep 04 09:37:23 EDT 2015	109610	Fly Light	Sample#2179670081909293154	f		screen	Rubin	Aljoscha Nern	JRC_IS17696-20150814_41_B4	Drosophila melanogaster	20x
IS17697	this paper	55C09-p65ADZp in VK00027_82F03-ZpGDBD in attP2	20150814_44_A4	nerna_is_screen_review	HAV5_X_0083	A01	Fri Sep 04 09:37:25 EDT 2015	109611	Fly Light	Sample#2179670090646028386	f		screen	Rubin	Aljoscha Nern	JRC_IS17697-20150814_44_A4	Drosophila melanogaster	20x
IS17698	this paper	65H10-p65ADZp in attP40; MKRS/TM6B_22A12-ZpGdbd in attP2	20161223_42_H4	nerna_is_screen_review	UAS_Chrimson_Venus_X_0070	A01	Tue Jan 24 09:34:41 EST 2017	141804	Fly Light	Sample#2363777535692505186	f		screen	Rubin	Aljoscha Nern	JRC_IS17698-20161223_42_H4	Drosophila melanogaster	20x
IS17700	this paper	67B01-p65ADZp in attP40_52F08-ZpGdbd in attP2	20170224_45_B6	nerna_is_screen_review	UAS_Chrimson_Venus_X_0070	A01	Wed Mar 29 16:26:39 EDT 2017	145791	Fly Light	Sample#2387058935384244322	f		screen	Rubin	Aljoscha Nern	JRC_IS17700-20170224_45_B6	Drosophila melanogaster	20x
IS17701	this paper	71C11-p65ADZp in attP40_22E12-ZpGdbd in attP2	20170310_51_H2	goldammerj_is_screen_review	UAS_Chrimson_Venus_X_0070	A	Thu Mar 30 18:08:46 EDT 2017	147731	Fly Light	Sample#2387447021989527650	f		screen	Terra Incognita	Jens Goldammer	JRC_IS17701-20170310_51_H2	Drosophila melanogaster	20x
IS17701	this paper	71C11-p65ADZp in attP40_22E12-ZpGdbd in attP2	20170224_41_E1	nerna_is_screen_review	UAS_Chrimson_Venus_X_0070	A01	Fri Mar 31 18:06:18 EDT 2017	145793	Fly Light	Sample#2387808789274296418	f		screen	Rubin	Aljoscha Nern	JRC_IS17701-20170224_41_E1	Drosophila melanogaster	20x
IS17702	this paper	72A10-p65ADZp in attP40; MKRS/TM6B_20A03-ZpGdbd in attP2	20150814_43_E1	nerna_is_screen_review	HAV5_X_0083	A01	Fri Sep 04 09:37:25 EDT 2015	109631	Fly Light	Sample#2179670089245130850	f		screen	Rubin	Aljoscha Nern	JRC_IS17702-20150814_43_E1	Drosophila melanogaster	20x
IS17702	this paper	72A10-p65ADZp in attP40; MKRS/TM6B_20A03-ZpGdbd in attP2	20210507_49_G3	wangk11_is_screen_review	UAS_Chrimson_Venus_X_0070	A01	Fri May 28 13:10:36 EDT 2021	226957	Fly Light	Sample#2938201541636522082	f		screen	Dickson	Kaiyu Wang	JRC_IS17702-20210507_49_G3	Drosophila melanogaster	20x
IS17704	this paper	72A10-p65ADZp in attP40; MKRS/TM6B_94F11-ZpGdbd in attP2	20150814_43_D1	nerna_is_screen_review	HAV5_X_0083	A01	Fri Sep 04 09:37:25 EDT 2015	109633	Fly Light	Sample#2179670088670511202	f		screen	Rubin	Aljoscha Nern	JRC_IS17704-20150814_43_D1	Drosophila melanogaster	20x
IS17705	this paper	72F09-p65ADZp in attP40_76E09-ZpGdbd in attP2	20170714_43_B3	nerna_is_screen_review	UAS_Chrimson_Venus_X_0070	A01	Tue Aug 01 15:23:40 EDT 2017	155524	Fly Light	Sample#2432341567772557410	f		screen	Rubin	Aljoscha Nern	JRC_IS17705-20170714_43_B3	Drosophila melanogaster	20x
IS17706	this paper	72F09-p65ADZp in attP40_81C11-ZpGdbd in attP2	20170714_43_B4	nerna_is_screen_review	UAS_Chrimson_Venus_X_0070	A01	Tue Aug 01 15:23:40 EDT 2017	155525	Fly Light	Sample#2432341567856443490	f		screen	Rubin	Aljoscha Nern	JRC_IS17706-20170714_43_B4	Drosophila melanogaster	20x
IS17707	this paper	72G03-p65ADZp in VK00027_55C09-ZpGdbd in attP2	20150814_42_B2	nerna_is_screen_review	HAV5_X_0083	A01	Tue Sep 01 14:44:17 EDT 2015	109639	Fly Light	Sample#2178660148858323042	f		screen	Rubin	Aljoscha Nern	JRC_IS17707-20150814_42_B2	Drosophila melanogaster	20x
IS17708	this paper	72G03-p65ADZp in su(Hw)attP8_55C09-ZpGdbd in attP2	20150814_42_B1	nerna_is_screen_review	HAV5_X_0083	A01	Tue Sep 01 14:44:16 EDT 2015	109641	Fly Light	Sample#2178660148388560994	f		screen	Rubin	Aljoscha Nern	JRC_IS17708-20150814_42_B1	Drosophila melanogaster	20x
IS17709	this paper	72G03-p65ADZp in attP40_44H01-ZpGdbd in attP2	20150814_42_C6	nerna_is_screen_review	HAV5_X_0083	A01	Tue Sep 01 14:44:18 EDT 2015	109643	Fly Light	Sample#2178660152968740962	f		screen	Rubin	Aljoscha Nern	JRC_IS17709-20150814_42_C6	Drosophila melanogaster	20x
IS17710	this paper	72G03-p65ADZp in attP40_55C09-ZpGdbd in attP2	20150814_42_A6	nerna_is_screen_review	HAV5_X_0083	A01	Tue Sep 01 14:44:16 EDT 2015	109644	Fly Light	Sample#2178660147914604642	f		screen	Rubin	Aljoscha Nern	JRC_IS17710-20150814_42_A6	Drosophila melanogaster	20x
IS17713	this paper	72H06-p65ADZp in attP40_71C11-ZpGdbd in attP2	20150814_44_B4	nerna_is_screen_review	HAV5_X_0083	A01	Fri Sep 04 09:37:26 EDT 2015	109653	Fly Light	Sample#2179670091786879074	f		screen	Rubin	Aljoscha Nern	JRC_IS17713-20150814_44_B4	Drosophila melanogaster	20x
IS17714	this paper	w; 73E05-p65ADZ; MKRS/TM6B_22D12-ZpGdbd in attP2	20150814_42_D4	nerna_is_screen_review	HAV5_X_0083	A01	Tue Sep 01 14:44:18 EDT 2015	109657	Fly Light	Sample#2178660154231226466	f		screen	Rubin	Aljoscha Nern	JRC_IS17714-20150814_42_D4	Drosophila melanogaster	20x
IS17716	this paper	w; 73E05-p65ADZ; MKRS/TM6B_44H01-ZpGdbd in attP2	20150814_42_C5	nerna_is_screen_review	HAV5_X_0083	A01	Tue Sep 01 14:44:17 EDT 2015	109659	Fly Light	Sample#2178660152545116258	f		screen	Rubin	Aljoscha Nern	JRC_IS17716-20150814_42_C5	Drosophila melanogaster	20x
IS17719	this paper	76E07-p65ADZp in attP40_25C03-ZpGdbd in attP2	20150814_41_B6	nerna_is_screen_review	HAV5_X_0083	A01	Fri Sep 04 09:37:23 EDT 2015	109666	Fly Light	Sample#2179670082488107106	f		screen	Rubin	Aljoscha Nern	JRC_IS17719-20150814_41_B6	Drosophila melanogaster	20x
IS17720	this paper	76E07-p65ADZp in attP40_76E09-ZpGdbd in attP2	20150814_44_A6	nerna_is_screen_review	HAV5_X_0083	A01	Fri Sep 04 09:37:26 EDT 2015	109667	Fly Light	Sample#2179670091224842338	f		screen	Rubin	Aljoscha Nern	JRC_IS17720-20150814_44_A6	Drosophila melanogaster	20x
IS17721	this paper	w; 76E09-p65ADZ; MKRS/TM6B_72F09-ZpGDBD in attP2	20150814_44_B1	nerna_is_screen_review	HAV5_X_0083	A01	Fri Sep 04 09:37:26 EDT 2015	109671	Fly Light	Sample#2179670091505860706	f		screen	Rubin	Aljoscha Nern	JRC_IS17721-20150814_44_B1	Drosophila melanogaster	20x
IS17722	this paper	w; 76E09-p65ADZ; MKRS/TM6B_81C11-ZpGdbd in attP2	20150814_44_A5	nerna_is_screen_review	HAV5_X_0083	A01	Fri Sep 04 09:37:25 EDT 2015	109672	Fly Light	Sample#2179670090927046754	f		screen	Rubin	Aljoscha Nern	JRC_IS17722-20150814_44_A5	Drosophila melanogaster	20x
IS17727	this paper	w; 31C03-p65ADZp; MKRS/ TM6B_VT039959-ZpGDBD in attP2	20150814_43_B1	nerna_is_screen_review	HAV5_X_0083	A01	Fri Sep 04 09:37:25 EDT 2015	109558	Fly Light	Sample#2179670086950846562	f		screen	Rubin	Aljoscha Nern	JRC_IS17727-20150814_43_B1	Drosophila melanogaster	20x
IS17728	this paper	w; 31C03-p65ADZp; MKRS/ TM6B_VT002015-ZpGDBD in attP2	20150814_42_A2	nerna_is_screen_review	HAV5_X_0083	A01	Tue Sep 01 14:44:16 EDT 2015	109559	Fly Light	Sample#2178660147415482466	f		screen	Rubin	Aljoscha Nern	JRC_IS17728-20150814_42_A2	Drosophila melanogaster	20x
IS17729	this paper	w; 31C03-p65ADZp; MKRS/ TM6B_VT014013-ZpGdbd in attP2	20150814_44_E2	nerna_is_screen_review	HAV5_X_0083	A01	Fri Sep 04 09:37:26 EDT 2015	109560	Fly Light	Sample#2179670092332138594	f		screen	Rubin	Aljoscha Nern	JRC_IS17729-20150814_44_E2	Drosophila melanogaster	20x
IS17730	this paper	37G11-p65ADZp in attP40_VT065290-ZpGDBD in attP2	20150814_41_A2	nerna_is_screen_review	HAV5_X_0083	A01	Fri Sep 04 09:37:23 EDT 2015	109563	Fly Light	Sample#2179670079484985442	f		screen	Rubin	Aljoscha Nern	JRC_IS17730-20150814_41_A2	Drosophila melanogaster	20x
IS17731	this paper	37H09-p65ADZp in attP40_VT002851-ZpGdbd in attP2	20150814_41_B1	nerna_is_screen_review	HAV5_X_0083	A01	Fri Sep 04 09:37:23 EDT 2015	109564	Fly Light	Sample#2179670081074626658	f		screen	Rubin	Aljoscha Nern	JRC_IS17731-20150814_41_B1	Drosophila melanogaster	20x
IS17736	this paper	42B05-p65ADZp in attP40_VT014013-ZpGdbd in attP2	20150814_44_E4	nerna_is_screen_review	HAV5_X_0083	A01	Fri Sep 04 09:37:26 EDT 2015	109570	Fly Light	Sample#2179670092877398114	f		screen	Rubin	Aljoscha Nern	JRC_IS17736-20150814_44_E4	Drosophila melanogaster	20x
IS17737	this paper	44A02-p65ADZp in attP40_VT025493-ZpGdbd in attP2	20150814_42_F4	nerna_is_screen_review	HAV5_X_0083	A01	Tue Sep 01 14:44:19 EDT 2015	109575	Fly Light	Sample#2178660157108519010	f		screen	Rubin	Aljoscha Nern	JRC_IS17737-20150814_42_F4	Drosophila melanogaster	20x
IS17738	this paper	45F05-p65ADZp in attP40_VT059224-ZpGdbd in attP2	20150814_41_A3	nerna_is_screen_review	HAV5_X_0083	A01	Fri Sep 04 09:37:23 EDT 2015	109577	Fly Light	Sample#2179670080424509538	f		screen	Rubin	Aljoscha Nern	JRC_IS17738-20150814_41_A3	Drosophila melanogaster	20x
IS17739	this paper	45F05-p65ADZp in attP40_VT050247-ZpGDBD in attP2	20150814_43_A4	nerna_is_screen_review	HAV5_X_0083	A01	Fri Sep 04 09:37:24 EDT 2015	109578	Fly Light	Sample#2179670086648856674	f		screen	Rubin	Aljoscha Nern	JRC_IS17739-20150814_43_A4	Drosophila melanogaster	20x
IS17740	this paper	46H03-p65ADZp in attP40_VT002042-ZpGdbd in attP2	20150814_42_C2	nerna_is_screen_review	HAV5_X_0083	A01	Tue Sep 01 14:44:17 EDT 2015	109581	Fly Light	Sample#2178660151202938978	f		screen	Rubin	Aljoscha Nern	JRC_IS17740-20150814_42_C2	Drosophila melanogaster	20x
IS17743	this paper	w; 49C08-p65ADZp; MKRS/ TM6B_VT061709-ZpGDBD in attP2	20150814_43_A1	nerna_is_screen_review	HAV5_X_0083	A01	Fri Sep 04 09:37:24 EDT 2015	109588	Fly Light	Sample#2179670086074237026	f		screen	Rubin	Aljoscha Nern	JRC_IS17743-20150814_43_A1	Drosophila melanogaster	20x
IS17744	this paper	52F08-p65ADZp in attP40; MKRS/TM6B_VT000455-ZpGDBD in attP2	20150814_43_B2	nerna_is_screen_review	HAV5_X_0083	A01	Fri Sep 04 09:37:25 EDT 2015	109597	Fly Light	Sample#2179670087227670626	f		screen	Rubin	Aljoscha Nern	JRC_IS17744-20150814_43_B2	Drosophila melanogaster	20x
IS17745	this paper	52F08-p65ADZp in attP40; MKRS/TM6B_VT002015-ZpGDBD in attP2	20150814_42_A1	nerna_is_screen_review	HAV5_X_0083	A01	Tue Sep 01 14:44:15 EDT 2015	109598	Fly Light	Sample#2178660143879684194	f		screen	Rubin	Aljoscha Nern	JRC_IS17745-20150814_42_A1	Drosophila melanogaster	20x
IS17746	this paper	52F08-p65ADZp in attP40; MKRS/TM6B_VT014013-ZpGdbd in attP2	20150814_44_E3	nerna_is_screen_review	HAV5_X_0083	A01	Fri Sep 04 09:37:26 EDT 2015	109599	Fly Light	Sample#2179670092608962658	f		screen	Rubin	Aljoscha Nern	JRC_IS17746-20150814_44_E3	Drosophila melanogaster	20x
IS17747	this paper	52F08-p65ADZp in attP40; MKRS/TM6B_VT019398-ZpGdbd in attP2	20150814_43_E2	nerna_is_screen_review	HAV5_X_0083	A01	Fri Sep 04 09:37:25 EDT 2015	109600	Fly Light	Sample#2179670089521954914	f		screen	Rubin	Aljoscha Nern	JRC_IS17747-20150814_43_E2	Drosophila melanogaster	20x
IS17748	this paper	54G12-p65ADZp in VK00027_VT050300-ZpGdbd in attP2	20150814_42_B5	nerna_is_screen_review	HAV5_X_0083	A01	Tue Sep 01 14:44:17 EDT 2015	109601	Fly Light	Sample#2178660150255026274	f		screen	Rubin	Aljoscha Nern	JRC_IS17748-20150814_42_B5	Drosophila melanogaster	20x
IS17749	this paper	54G12-p65ADZp in attP40; MKRS/TM6B_VT050300-ZpGdbd in attP2	20150814_42_B4	nerna_is_screen_review	HAV5_X_0083	A01	Tue Sep 01 14:44:17 EDT 2015	109602	Fly Light	Sample#2178660149789458530	f		screen	Rubin	Aljoscha Nern	JRC_IS17749-20150814_42_B4	Drosophila melanogaster	20x
IS17750	this paper	55C04-p65ADZp in attP40_VT026341-ZpGDBD in attP2	20150814_41_A5	nerna_is_screen_review	HAV5_X_0083	A01	Fri Sep 04 09:37:23 EDT 2015	109603	Fly Light	Sample#2179670080768442466	f		screen	Rubin	Aljoscha Nern	JRC_IS17750-20150814_41_A5	Drosophila melanogaster	20x
IS17751	this paper	55C04-p65ADZp in attP40_VT058695-ZpGdbd in attP2	20150814_43_A2	nerna_is_screen_review	HAV5_X_0083	A01	Fri Sep 04 09:37:24 EDT 2015	109604	Fly Light	Sample#2179670086367838306	f		screen	Rubin	Aljoscha Nern	JRC_IS17751-20150814_43_A2	Drosophila melanogaster	20x
IS17755	this paper	65H10-p65ADZp in attP40; MKRS/TM6B_VT000926-ZpGDBD in attP2	20150814_41_B2	nerna_is_screen_review	HAV5_X_0083	A01	Fri Sep 04 09:37:23 EDT 2015	109612	Fly Light	Sample#2179670081330479202	f		screen	Rubin	Aljoscha Nern	JRC_IS17755-20150814_41_B2	Drosophila melanogaster	20x
IS17757	this paper	65H10-p65ADZp in attP40; MKRS/TM6B_VT008149-ZpGdbd in attP2	20150814_42_E6	nerna_is_screen_review	HAV5_X_0083	A01	Tue Sep 01 14:44:18 EDT 2015	109614	Fly Light	Sample#2178660155883782242	f		screen	Rubin	Aljoscha Nern	JRC_IS17757-20150814_42_E6	Drosophila melanogaster	20x
IS17759	this paper	65H10-p65ADZp in attP40; MKRS/TM6B_VT002828-ZpGdbd in attP2	20150814_41_C5	nerna_is_screen_review	HAV5_X_0083	A01	Fri Sep 04 09:37:24 EDT 2015	109616	Fly Light	Sample#2179670083071115362	f		screen	Rubin	Aljoscha Nern	JRC_IS17759-20150814_41_C5	Drosophila melanogaster	20x
IS17760	this paper	67B01-p65ADZp in attP40_VT000455-ZpGDBD in attP2	20150814_43_C6	nerna_is_screen_review	HAV5_X_0083	A01	Fri Sep 04 09:37:25 EDT 2015	109619	Fly Light	Sample#2179670088372715618	f		screen	Rubin	Aljoscha Nern	JRC_IS17760-20150814_43_C6	Drosophila melanogaster	20x
IS17761	this paper	67B01-p65ADZp in attP40_VT002015-ZpGDBD in attP2	20150814_44_E1	nerna_is_screen_review	HAV5_X_0083	A01	Fri Sep 04 09:37:26 EDT 2015	109620	Fly Light	Sample#2179670092063703138	f		screen	Rubin	Aljoscha Nern	JRC_IS17761-20150814_44_E1	Drosophila melanogaster	20x
IS17762	this paper	67B01-p65ADZp in attP40_VT014013-ZpGdbd in attP2	20150814_44_F1	nerna_is_screen_review	HAV5_X_0083	A01	Fri Sep 04 09:37:26 EDT 2015	109621	Fly Light	Sample#2179670093162610786	f		screen	Rubin	Aljoscha Nern	JRC_IS17762-20150814_44_F1	Drosophila melanogaster	20x
IS17763	this paper	67B01-p65ADZp in attP40_VT019398-ZpGdbd in attP2	20150814_42_E1	nerna_is_screen_review	HAV5_X_0083	A01	Tue Sep 01 14:44:18 EDT 2015	109622	Fly Light	Sample#2178660154642268258	f		screen	Rubin	Aljoscha Nern	JRC_IS17763-20150814_42_E1	Drosophila melanogaster	20x
IS17765	this paper	71C11-p65ADZp in attP40_VT017421-ZpGDBD in attP2	20150814_42_F5	nerna_is_screen_review	HAV5_X_0083	A01	Tue Sep 01 14:44:19 EDT 2015	109625	Fly Light	Sample#2178660157486006370	f		screen	Rubin	Aljoscha Nern	JRC_IS17765-20150814_42_F5	Drosophila melanogaster	20x
IS17766	this paper	71C11-p65ADZp in attP40_VT017422-ZpGdbd in attP2	20170310_51_H4	goldammerj_is_screen_review	UAS_Chrimson_Venus_X_0070	A	Thu Mar 30 18:08:46 EDT 2017	147732	Fly Light	Sample#2387447022295711842	f		screen	Terra Incognita	Jens Goldammer	JRC_IS17766-20170310_51_H4	Drosophila melanogaster	20x
IS17766	this paper	71C11-p65ADZp in attP40_VT017422-ZpGdbd in attP2	20150814_42_E2	nerna_is_screen_review	HAV5_X_0083	A01	Tue Sep 01 14:44:18 EDT 2015	109626	Fly Light	Sample#2178660155053310050	f		screen	Rubin	Aljoscha Nern	JRC_IS17766-20150814_42_E2	Drosophila melanogaster	20x
IS17768	this paper	72A10-p65ADZp in attP40; MKRS/TM6B_VT002042-ZpGdbd in attP2	20150814_42_B6	nerna_is_screen_review	HAV5_X_0083	A01	Tue Sep 01 14:44:17 EDT 2015	109629	Fly Light	Sample#2178660150754148450	f		screen	Rubin	Aljoscha Nern	JRC_IS17768-20150814_42_B6	Drosophila melanogaster	20x
IS17768	this paper	72A10-p65ADZp in attP40; MKRS/TM6B_VT002042-ZpGdbd in attP2	20210507_48_D5	wangk11_is_screen_review	UAS_Chrimson_Venus_X_0070	A01	Thu May 27 14:27:08 EDT 2021	226817	Fly Light	Sample#2937858415101214818	f		screen	Dickson	Kaiyu Wang	JRC_IS17768-20210507_48_D5	Drosophila melanogaster	20x
IS17770	this paper	72F09-p65ADZp in attP40_VT019906-ZpGdbd in attP2	20170714_43_A6	nerna_is_screen_review	UAS_Chrimson_Venus_X_0070	A01	Tue Aug 01 15:23:40 EDT 2017	155522	Fly Light	Sample#2432341567520899170	f		screen	Rubin	Aljoscha Nern	JRC_IS17770-20170714_43_A6	Drosophila melanogaster	20x
IS17771	this paper	72F09-p65ADZp in attP40_VT043155-ZpGdbd in attP2	20170714_43_A1	nerna_is_screen_review	UAS_Chrimson_Venus_X_0070	A01	Tue Aug 01 15:23:40 EDT 2017	155523	Fly Light	Sample#2432341567072108642	f		screen	Rubin	Aljoscha Nern	JRC_IS17771-20170714_43_A1	Drosophila melanogaster	20x
IS17773	this paper	72G03-p65ADZp in su(Hw)attP8_VT014013-ZpGdbd in attP2	20150814_44_G1	nerna_is_screen_review	HAV5_X_0083	A01	Fri Sep 04 09:37:26 EDT 2015	109640	Fly Light	Sample#2179670093452017762	f		screen	Rubin	Aljoscha Nern	JRC_IS17773-20150814_44_G1	Drosophila melanogaster	20x
IS17777	this paper	72H06-p65ADZp in attP40_VT017422-ZpGdbd in attP2	20170310_52_B3	goldammerj_is_screen_review	UAS_Chrimson_Venus_X_0070	A	Thu Mar 30 17:34:43 EDT 2017	147733	Fly Light	Sample#2387438454272163938	f		screen	Terra Incognita	Jens Goldammer	JRC_IS17777-20170310_52_B3	Drosophila melanogaster	20x
IS17777	this paper	72H06-p65ADZp in attP40_VT017422-ZpGdbd in attP2	20150814_43_E5	nerna_is_screen_review	HAV5_X_0083	A01	Fri Sep 04 09:37:25 EDT 2015	109648	Fly Light	Sample#2179670089807167586	f		screen	Rubin	Aljoscha Nern	JRC_IS17777-20150814_43_E5	Drosophila melanogaster	20x
IS17780	this paper	w; 73E05-p65ADZ; MKRS/TM6B_VT050300-ZpGdbd in attP2	20150814_42_B3	nerna_is_screen_review	HAV5_X_0083	A01	Tue Sep 01 14:44:17 EDT 2015	109654	Fly Light	Sample#2178660149323890786	f		screen	Rubin	Aljoscha Nern	JRC_IS17780-20150814_42_B3	Drosophila melanogaster	20x
IS17782	this paper	w; 73E05-p65ADZ; MKRS/TM6B_VT014013-ZpGdbd in attP2	20150814_41_B5	nerna_is_screen_review	HAV5_X_0083	A01	Fri Sep 04 09:37:23 EDT 2015	109656	Fly Light	Sample#2179670082202894434	f		screen	Rubin	Aljoscha Nern	JRC_IS17782-20150814_41_B5	Drosophila melanogaster	20x
IS17784	this paper	76E07-p65ADZp in attP40_VT040018-ZpGdbd in attP2	20150814_42_E5	nerna_is_screen_review	HAV5_X_0083	A01	Tue Sep 01 14:44:18 EDT 2015	109663	Fly Light	Sample#2178660155468546146	f		screen	Rubin	Aljoscha Nern	JRC_IS17784-20150814_42_E5	Drosophila melanogaster	20x
IS17786	this paper	76E07-p65ADZp in attP40_VT046799-ZpGdbd in attP2	20150814_41_E1	nerna_is_screen_review	HAV5_X_0083	A01	Fri Sep 04 09:37:24 EDT 2015	109665	Fly Light	Sample#2179670083394076770	f		screen	Rubin	Aljoscha Nern	JRC_IS17786-20150814_41_E1	Drosophila melanogaster	20x
IS17787	this paper	w; 76E09-p65ADZ; MKRS/TM6B_VT019906-ZpGdbd in attP2	20150814_44_A1	nerna_is_screen_review	HAV5_X_0083	A01	Fri Sep 04 09:37:25 EDT 2015	109668	Fly Light	Sample#2179670090100768866	f		screen	Rubin	Aljoscha Nern	JRC_IS17787-20150814_44_A1	Drosophila melanogaster	20x
IS17788	this paper	w; 76E09-p65ADZ; MKRS/TM6B_VT058699-ZpGdbd in attP2	20150814_42_F6	nerna_is_screen_review	HAV5_X_0083	A01	Tue Sep 01 14:44:19 EDT 2015	109669	Fly Light	Sample#2178660157892853858	f		screen	Rubin	Aljoscha Nern	JRC_IS17788-20150814_42_F6	Drosophila melanogaster	20x
IS17789	this paper	w; 76E09-p65ADZ; MKRS/TM6B_VT043155-ZpGdbd in attP2	20150814_42_F3	nerna_is_screen_review	HAV5_X_0083	A01	Tue Sep 01 14:44:18 EDT 2015	109670	Fly Light	Sample#2178660156697477218	f		screen	Rubin	Aljoscha Nern	JRC_IS17789-20150814_42_F3	Drosophila melanogaster	20x
IS17802	this paper	VT040575-p65ADZp in attP40_64F02-ZpGdbd in attP2	20150821_41_B3	nerna_is_screen_review	HAV5_X_0083	A01	Fri Sep 11 07:56:29 EDT 2015	110012	Fly Light	Sample#2182181401388908642	f		screen	Rubin	Aljoscha Nern	JRC_IS17802-20150821_41_B3	Drosophila melanogaster	20x
IS17804	this paper	VT040575-p65ADZp in attP40_76E11-ZpGdbd in attP2	20150821_43_A6	nerna_is_screen_review	HAV5_X_0083	A01	Fri Sep 11 15:02:15 EDT 2015	110014	Fly Light	Sample#2182288550857277538	f		screen	Rubin	Aljoscha Nern	JRC_IS17804-20150821_43_A6	Drosophila melanogaster	20x
IS17805	this paper	VT013741-p65ADZp in attP40_38A07-ZpGDBD in attP2	20150821_42_C6	nerna_is_screen_review	HAV5_X_0083	A01	Fri Sep 04 09:37:24 EDT 2015	110019	Fly Light	Sample#2179670084014833762	f		screen	Rubin	Aljoscha Nern	JRC_IS17805-20150821_42_C6	Drosophila melanogaster	20x
IS17806	this paper	VT014724-p65ADZp in attP40_10G03-ZpGdbd in attP2	20170714_46_B6	asoy_is_screen_review	UAS_Chrimson_Venus_X_0070	A01	Fri Dec 15 15:53:34 EST 2017	155566	Fly Light	Sample#2481648943444787298	f		screen	Rubin	Yoshi Aso	JRC_IS17806-20170714_46_B6	Drosophila melanogaster	20x
IS17806	this paper	VT014724-p65ADZp in attP40_10G03-ZpGdbd in attP2	20150821_42_G1	nerna_is_screen_review	HAV5_X_0083	A01	Fri Sep 04 09:37:24 EDT 2015	110024	Fly Light	Sample#2179670085461868642	f		screen	Rubin	Aljoscha Nern	JRC_IS17806-20150821_42_G1	Drosophila melanogaster	20x
IS17810	this paper	VT043145-p65ADZp in attP40_21F03-ZpGDBD in attP2	20200131_44_F1	ditp_is_screen_review	UAS_Chrimson_Venus_X_0070	A01	Thu Feb 20 14:54:50 EST 2020	207074	Fly Light	Sample#2770457288274608226	f		screen	Descending Interneuron	Shigehiro Namiki	JRC_IS17810-20200131_44_F1	Drosophila melanogaster	20x
IS17811	this paper	VT043145-p65ADZp in attP40_87A08-ZpGDBD in attP2	20150821_43_B2	nerna_is_screen_review	HAV5_X_0083	A01	Fri Sep 11 15:02:15 EDT 2015	110033	Fly Light	Sample#2182288551150878818	f		screen	Rubin	Aljoscha Nern	JRC_IS17811-20150821_43_B2	Drosophila melanogaster	20x
IS17815	this paper	VT026034-p65ADZp in attP40_10G03-ZpGdbd in attP2	20170714_45_A2	asoy_is_screen_review	UAS_Chrimson_Venus_X_0070	A01	Tue Jan 16 14:27:51 EST 2018	155579	Fly Light	Sample#2493223782185959522	f		screen	Rubin	Yoshi Aso	JRC_IS17815-20170714_45_A2	Drosophila melanogaster	20x
IS17815	this paper	VT026034-p65ADZp in attP40_10G03-ZpGdbd in attP2	20150821_41_E4	nerna_is_screen_review	HAV5_X_0083	A01	Fri Sep 11 07:56:29 EDT 2015	110069	Fly Light	Sample#2182181404761129058	f		screen	Rubin	Aljoscha Nern	JRC_IS17815-20150821_41_E4	Drosophila melanogaster	20x
IS17819	this paper	VT019012-p65ADZp in attP40_71F06-ZpGdbd in attP2	20150821_41_B4	nerna_is_screen_review	HAV5_X_0083	A01	Fri Sep 11 07:56:29 EDT 2015	110079	Fly Light	Sample#2182181401854476386	f		screen	Rubin	Aljoscha Nern	JRC_IS17819-20150821_41_B4	Drosophila melanogaster	20x
IS17831	this paper	VT008974-p65ADZp in attP40_VT048581-ZpGDBD in attP2	20150821_42_G4	nerna_is_screen_review	HAV5_X_0083	A01	Fri Sep 04 09:37:24 EDT 2015	109984	Fly Light	Sample#2179670085768052834	f		screen	Rubin	Aljoscha Nern	JRC_IS17831-20150821_42_G4	Drosophila melanogaster	20x
IS17832	this paper	VT026647-p65ADZp in attP40_VT048581-ZpGDBD in attP2	20150821_41_D3	nerna_is_screen_review	HAV5_X_0083	A01	Fri Sep 11 07:56:29 EDT 2015	109989	Fly Light	Sample#2182181403146322018	f		screen	Rubin	Aljoscha Nern	JRC_IS17832-20150821_41_D3	Drosophila melanogaster	20x
IS17833	this paper	VT027001-p65ADZp in attP40_VT026477-ZpGdbd in attP2	20170714_45_D4	asoy_is_screen_review	UAS_Chrimson_Venus_X_0070	A01	Tue Jan 16 14:27:51 EST 2018	155560	Fly Light	Sample#2493223783440056418	f		screen	Rubin	Yoshi Aso	JRC_IS17833-20170714_45_D4	Drosophila melanogaster	20x
IS17833	this paper	VT027001-p65ADZp in attP40_VT026477-ZpGdbd in attP2	20170224_44_D2	nerna_is_screen_review	UAS_Chrimson_Venus_X_0070	A01	Wed Mar 29 16:27:06 EDT 2017	145732	Fly Light	Sample#2387059046550077538	f		screen	Rubin	Aljoscha Nern	JRC_IS17833-20170224_44_D2	Drosophila melanogaster	20x
IS17834	this paper	VT027001-p65ADZp in attP40_VT014958-ZpGdbd in attP2	20170224_44_E2	nerna_is_screen_review	UAS_Chrimson_Venus_X_0070	A01	Wed Mar 29 16:27:06 EDT 2017	145733	Fly Light	Sample#2387059046898204770	f		screen	Rubin	Aljoscha Nern	JRC_IS17834-20170224_44_E2	Drosophila melanogaster	20x
IS17836	this paper	VT027001-p65ADZp in attP40_VT045568-ZpGdbd in attP2	20170224_41_C6	nerna_is_screen_review	UAS_Chrimson_Venus_X_0070	A01	Fri Mar 31 18:06:18 EDT 2017	145735	Fly Light	Sample#2387808788485767266	f		screen	Rubin	Aljoscha Nern	JRC_IS17836-20170224_41_C6	Drosophila melanogaster	20x
IS17839	this paper	VT048416-p65ADZp in attP40_VT040575-ZpGdbd in attP2	20150821_42_E1	nerna_is_screen_review	HAV5_X_0083	A01	Fri Sep 04 09:37:24 EDT 2015	109996	Fly Light	Sample#2179670084635590754	f		screen	Rubin	Aljoscha Nern	JRC_IS17839-20150821_42_E1	Drosophila melanogaster	20x
IS17841	this paper	VT026477-p65ADZp in attP40_VT027001-ZpGdbd in attP2	20170714_45_D3	asoy_is_screen_review	UAS_Chrimson_Venus_X_0070	A01	Tue Jan 16 14:27:51 EST 2018	155561	Fly Light	Sample#2493223783377141858	f		screen	Rubin	Yoshi Aso	JRC_IS17841-20170714_45_D3	Drosophila melanogaster	20x
IS17843	this paper	VT026477-p65ADZp in attP40_VT061927-ZpGdbd in attP2	20150821_42_A3	nerna_is_screen_review	HAV5_X_0083	A01	Fri Sep 04 09:37:24 EDT 2015	110001	Fly Light	Sample#2179670083708649570	f		screen	Rubin	Aljoscha Nern	JRC_IS17843-20150821_42_A3	Drosophila melanogaster	20x
IS17850	this paper	VT040575-p65ADZp in attP40_VT048416-ZpGdbd in attP2	20150821_42_D5	nerna_is_screen_review	HAV5_X_0083	A01	Fri Sep 04 09:37:24 EDT 2015	110008	Fly Light	Sample#2179670084341989474	f		screen	Rubin	Aljoscha Nern	JRC_IS17850-20150821_42_D5	Drosophila melanogaster	20x
IS17851	this paper	VT040575-p65ADZp in attP40_VT043014-ZpGDBD in attP2	20150821_42_E3	nerna_is_screen_review	HAV5_X_0083	A01	Fri Sep 04 09:37:24 EDT 2015	110009	Fly Light	Sample#2179670084916609122	f		screen	Rubin	Aljoscha Nern	JRC_IS17851-20150821_42_E3	Drosophila melanogaster	20x
IS17852	this paper	VT040575-p65ADZp in attP40_VT008153-ZpGdbd in attP2	20150821_41_A1	nerna_is_screen_review	HAV5_X_0083	A01	Fri Sep 11 07:56:28 EDT 2015	110010	Fly Light	Sample#2182181399522443362	f		screen	Rubin	Aljoscha Nern	JRC_IS17852-20150821_41_A1	Drosophila melanogaster	20x
IS17853	this paper	VT040575-p65ADZp in attP40_VT013872-ZpGDBD in attP2	20150821_41_A3	nerna_is_screen_review	HAV5_X_0083	A01	Fri Sep 11 07:56:28 EDT 2015	110011	Fly Light	Sample#2182181401007226978	f		screen	Rubin	Aljoscha Nern	JRC_IS17853-20150821_41_A3	Drosophila melanogaster	20x
IS17861	this paper	VT014724-p65ADZp in attP40_VT013531-ZpGdbd in attP2	20150821_42_F2	nerna_is_screen_review	HAV5_X_0083	A01	Fri Sep 04 09:37:24 EDT 2015	110023	Fly Light	Sample#2179670085180850274	f		screen	Rubin	Aljoscha Nern	JRC_IS17861-20150821_42_F2	Drosophila melanogaster	20x
IS17876	this paper	VT026761-p65ADZp in attP40_VT037862-ZpGdbd in attP2	20150821_41_B6	nerna_is_screen_review	HAV5_X_0083	A01	Fri Sep 11 07:56:29 EDT 2015	110048	Fly Light	Sample#2182181402257129570	f		screen	Rubin	Aljoscha Nern	JRC_IS17876-20150821_41_B6	Drosophila melanogaster	20x
IS17883	this paper	VT056765-p65ADZ in attP40_VT061221-ZpGDBD in attP2	20150821_43_C4	nerna_is_screen_review	HAV5_X_0083	A01	Fri Sep 11 15:02:15 EDT 2015	110056	Fly Light	Sample#2182288551465451618	f		screen	Rubin	Aljoscha Nern	JRC_IS17883-20150821_43_C4	Drosophila melanogaster	20x
IS17884	this paper	VT056765-p65ADZ in attP40_VT037862-ZpGdbd in attP2	20150821_41_D4	nerna_is_screen_review	HAV5_X_0083	A01	Fri Sep 11 07:56:29 EDT 2015	110057	Fly Light	Sample#2182181403557363810	f		screen	Rubin	Aljoscha Nern	JRC_IS17884-20150821_41_D4	Drosophila melanogaster	20x
IS17891	this paper	VT026034-p65ADZp in attP40_VT014724-ZpGDBD in attP2	20170714_45_G4	asoy_is_screen_review	UAS_Chrimson_Venus_X_0070	A01	Tue Jan 16 14:27:52 EST 2018	155578	Fly Light	Sample#2493223784530575458	f		screen	Rubin	Yoshi Aso	JRC_IS17891-20170714_45_G4	Drosophila melanogaster	20x
IS17891	this paper	VT026034-p65ADZp in attP40_VT014724-ZpGDBD in attP2	20150821_41_C3	nerna_is_screen_review	HAV5_X_0083	A01	Fri Sep 11 07:56:29 EDT 2015	110064	Fly Light	Sample#2182181402689142882	f		screen	Rubin	Aljoscha Nern	JRC_IS17891-20150821_41_C3	Drosophila melanogaster	20x
IS17895	this paper	VT026034-p65ADZp in attP40_VT013531-ZpGdbd in attP2	20150821_41_D5	nerna_is_screen_review	HAV5_X_0083	A01	Fri Sep 11 07:56:29 EDT 2015	110068	Fly Light	Sample#2182181403964211298	f		screen	Rubin	Aljoscha Nern	JRC_IS17895-20150821_41_D5	Drosophila melanogaster	20x
IS17902	this paper	VT029799-p65ADZ in attP40_VT048581-ZpGDBD in attP2	20150821_41_F1	nerna_is_screen_review	HAV5_X_0083	A01	Fri Sep 11 07:56:29 EDT 2015	110082	Fly Light	Sample#2182181405134422114	f		screen	Rubin	Aljoscha Nern	JRC_IS17902-20150821_41_F1	Drosophila melanogaster	20x
IS17903	this paper	VT032407-p65ADZ in attP40_VT048581-ZpGDBD in attP2	20150821_43_H2	nerna_is_screen_review	HAV5_X_0083	A01	Fri Sep 11 15:02:15 EDT 2015	110083	Fly Light	Sample#2182288552526610530	f		screen	Rubin	Aljoscha Nern	JRC_IS17903-20150821_43_H2	Drosophila melanogaster	20x
IS17906	this paper	VT002856-p65ADZp in attP40_VT021374-ZpGdbd in attP2	20150821_41_D6	nerna_is_screen_review	HAV5_X_0083	A01	Fri Sep 11 07:56:29 EDT 2015	110086	Fly Light	Sample#2182181404350087266	f		screen	Rubin	Aljoscha Nern	JRC_IS17906-20150821_41_D6	Drosophila melanogaster	20x
IS17907	this paper	VT002856-p65ADZp in attP40_VT002856-ZpGdbd in attP2	20170224_41_G1	nerna_is_screen_review	UAS_Chrimson_Venus_X_0070	A01	Fri Mar 31 18:06:18 EDT 2017	145755	Fly Light	Sample#2387808790398369890	f		screen	Rubin	Aljoscha Nern	JRC_IS17907-20170224_41_G1	Drosophila melanogaster	20x
IS17914	this paper	VT013531-p65ADZ in attP40_VT014724-ZpGDBD in attP2	20150821_43_G3	nerna_is_screen_review	HAV5_X_0083	A01	Fri Sep 11 15:02:15 EDT 2015	110100	Fly Light	Sample#2182288552245592162	f		screen	Rubin	Aljoscha Nern	JRC_IS17914-20150821_43_G3	Drosophila melanogaster	20x
IS17915	this paper	VT013531-p65ADZ in attP40_VT020837-ZpGdbd in attP2	20150821_43_F4	nerna_is_screen_review	HAV5_X_0083	A01	Fri Sep 11 15:02:15 EDT 2015	110101	Fly Light	Sample#2182288551985545314	f		screen	Rubin	Aljoscha Nern	JRC_IS17915-20150821_43_F4	Drosophila melanogaster	20x
IS17917	this paper	VT013531-p65ADZ in attP40_VT002856-ZpGdbd in attP2	20150821_43_F3	nerna_is_screen_review	HAV5_X_0083	A01	Fri Sep 11 15:02:15 EDT 2015	110103	Fly Light	Sample#2182288551725498466	f		screen	Rubin	Aljoscha Nern	JRC_IS17917-20150821_43_F3	Drosophila melanogaster	20x
IS17919	this paper	11A03-p65ADZp/ CyO in attP40_83D05-ZpGdbd in attP2	20150828_42_E1	nerna_is_screen_review	HAV5_X_0083	A01	Fri Sep 11 15:02:16 EDT 2015	110512	Fly Light	Sample#2182288556330844258	f		screen	Rubin	Aljoscha Nern	JRC_IS17919-20150828_42_E1	Drosophila melanogaster	20x
IS17924	this paper	23F02-p65ADZp in attP40_71F06-ZpGdbd in attP2	20150828_44_D6	nerna_is_screen_review	HAV5_X_0083	A01	Fri Sep 18 10:14:32 EDT 2015	110525	Fly Light	Sample#2184752860686712930	f		screen	Rubin	Aljoscha Nern	JRC_IS17924-20150828_44_D6	Drosophila melanogaster	20x
IS17925	this paper	23F02-p65ADZp in attP40_72C08-ZpGdbd in attP2	20150828_42_C6	nerna_is_screen_review	HAV5_X_0083	A01	Fri Sep 11 15:02:16 EDT 2015	110526	Fly Light	Sample#2182288555265491042	f		screen	Rubin	Aljoscha Nern	JRC_IS17925-20150828_42_C6	Drosophila melanogaster	20x
IS17927	this paper	23H07-p65ADZp in attP40_26A02-ZpGdbd in attP2	20150828_42_A3	nerna_is_screen_review	HAV5_X_0083	A01	Fri Sep 11 15:02:16 EDT 2015	110528	Fly Light	Sample#2182288553373859938	f		screen	Rubin	Aljoscha Nern	JRC_IS17927-20150828_42_A3	Drosophila melanogaster	20x
IS17928	this paper	23H07-p65ADZp in attP40_75H08-ZpGdbd in attP2	20150828_42_D3	nerna_is_screen_review	HAV5_X_0083	A01	Fri Sep 11 15:02:16 EDT 2015	110529	Fly Light	Sample#2182288555768807522	f		screen	Rubin	Aljoscha Nern	JRC_IS17928-20150828_42_D3	Drosophila melanogaster	20x
IS17929	this paper	26A02-p65ADZp in attP40_23H07-ZpGdbd in attP2	20150828_45_B6	nerna_is_screen_review	HAV5_X_0083	A01	Sun Sep 20 00:06:17 EDT 2015	110530	Fly Light	Sample#2185324564177748066	f		screen	Rubin	Aljoscha Nern	JRC_IS17929-20150828_45_B6	Drosophila melanogaster	20x
IS17936	this paper	42G10-p65ADZp in attP40_83D05-ZpGdbd in attP2	20150828_44_A1	nerna_is_screen_review	HAV5_X_0083	A01	Fri Sep 18 10:14:32 EDT 2015	110545	Fly Light	Sample#2184752858300153954	f		screen	Rubin	Aljoscha Nern	JRC_IS17936-20150828_44_A1	Drosophila melanogaster	20x
IS17937	this paper	48F07-p65ADZp in attP40; MKRS/TM6B_21F03-ZpGDBD in attP2	20150828_42_C5	nerna_is_screen_review	HAV5_X_0083	A01	Fri Sep 11 15:02:16 EDT 2015	110546	Fly Light	Sample#2182288554929946722	f		screen	Rubin	Aljoscha Nern	JRC_IS17937-20150828_42_C5	Drosophila melanogaster	20x
IS17942	this paper	54B01-p65ADZp in attP40_51B11-ZpGdbd in attP2	20150828_44_C6	nerna_is_screen_review	HAV5_X_0083	A01	Fri Sep 18 10:14:32 EDT 2015	110555	Fly Light	Sample#2184752859529085026	f		screen	Rubin	Aljoscha Nern	JRC_IS17942-20150828_44_C6	Drosophila melanogaster	20x
IS17945	this paper	54B03-p65ADZp in attP40_75H08-ZpGdbd in attP2	20150828_42_D4	nerna_is_screen_review	HAV5_X_0083	A01	Fri Sep 11 15:02:16 EDT 2015	110558	Fly Light	Sample#2182288556033048674	f		screen	Rubin	Aljoscha Nern	JRC_IS17945-20150828_42_D4	Drosophila melanogaster	20x
IS17946	this paper	64F02-p65ADZp in attP40_69A01-ZpGdbd in attP2	20150828_44_D4	nerna_is_screen_review	HAV5_X_0083	A01	Fri Sep 18 10:14:32 EDT 2015	110562	Fly Light	Sample#2184752860120481890	f		screen	Rubin	Aljoscha Nern	JRC_IS17946-20150828_44_D4	Drosophila melanogaster	20x
IS17948	this paper	w; 65C02-p65ADZ; MKRS/TM6B_51B11-ZpGdbd in attP2	20150828_44_D1	nerna_is_screen_review	HAV5_X_0083	A01	Fri Sep 18 10:14:32 EDT 2015	110567	Fly Light	Sample#2184752859835269218	f		screen	Rubin	Aljoscha Nern	JRC_IS17948-20150828_44_D1	Drosophila melanogaster	20x
IS17950	this paper	w; 65C02-p65ADZ; MKRS/TM6B_54B03-ZpGdbd in attP2	20150828_41_B3	nerna_is_screen_review	HAV5_X_0083	A01	Mon Sep 14 11:54:46 EDT 2015	110569	Fly Light	Sample#2183328533353332834	f		screen	Rubin	Aljoscha Nern	JRC_IS17950-20150828_41_B3	Drosophila melanogaster	20x
IS17953	this paper	71F06-p65ADZp in attP40_72C08-ZpGdbd in attP2	20150828_42_D1	nerna_is_screen_review	HAV5_X_0083	A01	Fri Sep 11 15:02:16 EDT 2015	110577	Fly Light	Sample#2182288555508760674	f		screen	Rubin	Aljoscha Nern	JRC_IS17953-20150828_42_D1	Drosophila melanogaster	20x
IS17956	this paper	72C08-p65ADZp in attP40_71F06-ZpGdbd in attP2	20150828_42_B3	nerna_is_screen_review	HAV5_X_0083	A01	Fri Sep 11 15:02:16 EDT 2015	110585	Fly Light	Sample#2182288554426630242	f		screen	Rubin	Aljoscha Nern	JRC_IS17956-20150828_42_B3	Drosophila melanogaster	20x
IS17958	this paper	75C12-p65ADZp in attP40_69A01-ZpGdbd in attP2	20150828_44_D5	nerna_is_screen_review	HAV5_X_0083	A01	Fri Sep 18 10:14:32 EDT 2015	110588	Fly Light	Sample#2184752860405694562	f		screen	Rubin	Aljoscha Nern	JRC_IS17958-20150828_44_D5	Drosophila melanogaster	20x
IS17960	this paper	75H08-p65ADZp in attP40; MKRS/TM6B_54B03-ZpGdbd in attP2	20150828_43_A2	nerna_is_screen_review	HAV5_X_0083	A01	Thu Sep 17 12:48:27 EDT 2015	110590	Fly Light	Sample#2184429204286734434	f		screen	Rubin	Aljoscha Nern	JRC_IS17960-20150828_43_A2	Drosophila melanogaster	20x
IS17961	this paper	76F12-p65ADZp in attP40; MKRS/TM6B_21B12-ZpGdbd in attP2	20150828_42_A2	nerna_is_screen_review	HAV5_X_0083	A01	Fri Sep 11 15:02:16 EDT 2015	110593	Fly Light	Sample#2182288553063481442	f		screen	Rubin	Aljoscha Nern	JRC_IS17961-20150828_42_A2	Drosophila melanogaster	20x
IS17962	this paper	76F12-p65ADZp in attP40; MKRS/TM6B_37H04-ZpGdbd in attP2	20150828_42_A5	nerna_is_screen_review	HAV5_X_0083	A01	Fri Sep 11 15:02:16 EDT 2015	110594	Fly Light	Sample#2182288553625518178	f		screen	Rubin	Aljoscha Nern	JRC_IS17962-20150828_42_A5	Drosophila melanogaster	20x
IS17963	this paper	81C11-p65ADZp in attP40_72F09-ZpGDBD in attP2	20150828_42_B1	nerna_is_screen_review	HAV5_X_0083	A01	Fri Sep 11 15:02:16 EDT 2015	110597	Fly Light	Sample#2182288553881370722	f		screen	Rubin	Aljoscha Nern	JRC_IS17963-20150828_42_B1	Drosophila melanogaster	20x
IS17964	this paper	81C11-p65ADZp in attP40_76E09-ZpGdbd in attP2	20150828_42_B2	nerna_is_screen_review	HAV5_X_0083	A01	Fri Sep 11 15:02:16 EDT 2015	110598	Fly Light	Sample#2182288554174972002	f		screen	Rubin	Aljoscha Nern	JRC_IS17964-20150828_42_B2	Drosophila melanogaster	20x
IS17967	this paper	81D05-p65ADZp in attP40/ CyO_21D11-ZpGdbd in attP2	20150828_45_B4	nerna_is_screen_review	HAV5_X_0083	A01	Sun Sep 20 00:06:17 EDT 2015	110605	Fly Light	Sample#2185324563892535394	f		screen	Rubin	Aljoscha Nern	JRC_IS17967-20150828_45_B4	Drosophila melanogaster	20x
IS17981	this paper	23F02-p65ADZp in attP40_VT019012-ZpGdbd in attP2	20150828_41_C3	nerna_is_screen_review	HAV5_X_0083	A01	Mon Sep 14 11:54:46 EDT 2015	110521	Fly Light	Sample#2183328533886009442	f		screen	Rubin	Aljoscha Nern	JRC_IS17981-20150828_41_C3	Drosophila melanogaster	20x
IS17982	this paper	23F02-p65ADZp in attP40_VT029570-ZpGdbd in attP2	20150828_41_C4	nerna_is_screen_review	HAV5_X_0083	A01	Mon Sep 14 11:54:46 EDT 2015	110522	Fly Light	Sample#2183328534162833506	f		screen	Rubin	Aljoscha Nern	JRC_IS17982-20150828_41_C4	Drosophila melanogaster	20x
IS17983	this paper	23F02-p65ADZp in attP40_VT017649-ZpGdbd in attP2	20150828_41_C5	nerna_is_screen_review	HAV5_X_0083	A01	Mon Sep 14 11:54:46 EDT 2015	110523	Fly Light	Sample#2183328534435463266	f		screen	Rubin	Aljoscha Nern	JRC_IS17983-20150828_41_C5	Drosophila melanogaster	20x
IS17984	this paper	26E12-p65ADZp in attP40_VT048581-ZpGDBD in attP2	20150828_45_C5	nerna_is_screen_review	HAV5_X_0083	A01	Sun Sep 20 00:06:17 EDT 2015	110531	Fly Light	Sample#2185324564458766434	f		screen	Rubin	Aljoscha Nern	JRC_IS17984-20150828_45_C5	Drosophila melanogaster	20x
IS17986	this paper	38A07-p65ADZp in attP40_VT013741-ZpGdbd in attP2	20150828_44_C1	nerna_is_screen_review	HAV5_X_0083	A01	Fri Sep 18 10:14:32 EDT 2015	110533	Fly Light	Sample#2184752859248066658	f		screen	Rubin	Aljoscha Nern	JRC_IS17986-20150828_44_C1	Drosophila melanogaster	20x
IS17992	this paper	51B11-p65ADZp in attP40_VT044966-ZpGDBD in attP2	20150828_43_C5	nerna_is_screen_review	HAV5_X_0083	A01	Thu Sep 17 12:48:27 EDT 2015	110548	Fly Light	Sample#2184429205133983842	f		screen	Rubin	Aljoscha Nern	JRC_IS17992-20150828_43_C5	Drosophila melanogaster	20x
IS17994	this paper	54B01-p65ADZp in attP40_VT048581-ZpGDBD in attP2	20150828_41_B6	nerna_is_screen_review	HAV5_X_0083	A01	Mon Sep 14 11:54:46 EDT 2015	110552	Fly Light	Sample#2183328533617573986	f		screen	Rubin	Aljoscha Nern	JRC_IS17994-20150828_41_B6	Drosophila melanogaster	20x
IS18000	this paper	w; 65C02-p65ADZ; MKRS/TM6B_VT044966-ZpGDBD in attP2	20150828_41_A4	nerna_is_screen_review	HAV5_X_0083	A01	Mon Sep 14 11:54:46 EDT 2015	110564	Fly Light	Sample#2183328532413808738	f		screen	Rubin	Aljoscha Nern	JRC_IS18000-20150828_41_A4	Drosophila melanogaster	20x
IS18004	this paper	71F06-p65ADZp in attP40_VT019012-ZpGdbd in attP2	20150828_41_A5	nerna_is_screen_review	HAV5_X_0083	A01	Mon Sep 14 11:54:46 EDT 2015	110573	Fly Light	Sample#2183328532816461922	f		screen	Rubin	Aljoscha Nern	JRC_IS18004-20150828_41_A5	Drosophila melanogaster	20x
IS18006	this paper	71F06-p65ADZp in attP40_VT017649-ZpGdbd in attP2	20150828_41_B1	nerna_is_screen_review	HAV5_X_0083	A01	Mon Sep 14 11:54:46 EDT 2015	110575	Fly Light	Sample#2183328533089091682	f		screen	Rubin	Aljoscha Nern	JRC_IS18006-20150828_41_B1	Drosophila melanogaster	20x
IS18011	this paper	72C08-p65ADZp in attP40_VT017649-ZpGdbd in attP2	20150828_45_D4	nerna_is_screen_review	HAV5_X_0083	A01	Sun Sep 20 00:06:17 EDT 2015	110583	Fly Light	Sample#2185324564748173410	f		screen	Rubin	Aljoscha Nern	JRC_IS18011-20150828_45_D4	Drosophila melanogaster	20x
IS18015	this paper	81C11-p65ADZp in attP40_VT019906-ZpGdbd in attP2	20150828_44_B2	nerna_is_screen_review	HAV5_X_0083	A01	Fri Sep 18 10:14:32 EDT 2015	110595	Fly Light	Sample#2184752858686029922	f		screen	Rubin	Aljoscha Nern	JRC_IS18015-20150828_44_B2	Drosophila melanogaster	20x
IS18016	this paper	81C11-p65ADZp in attP40_VT043155-ZpGdbd in attP2	20150828_44_B4	nerna_is_screen_review	HAV5_X_0083	A01	Fri Sep 18 10:14:32 EDT 2015	110596	Fly Light	Sample#2184752858967048290	f		screen	Rubin	Aljoscha Nern	JRC_IS18016-20150828_44_B4	Drosophila melanogaster	20x
IS18018	this paper	81D05-p65ADZp in VK00027_VT041832-ZpGdbd in attP2	20150828_45_B3	nerna_is_screen_review	HAV5_X_0083	A01	Sun Sep 20 00:06:17 EDT 2015	110600	Fly Light	Sample#2185324563611517026	f		screen	Rubin	Aljoscha Nern	JRC_IS18018-20150828_45_B3	Drosophila melanogaster	20x
IS18030	this paper	VT037862-p65ADZp in attP40_VT061221-ZpGDBD in attP2	20150828_43_A4	nerna_is_screen_review	HAV5_X_0083	A01	Thu Sep 17 12:48:27 EDT 2015	110502	Fly Light	Sample#2184429204576141410	f		screen	Rubin	Aljoscha Nern	JRC_IS18030-20150828_43_A4	Drosophila melanogaster	20x
IS18034	this paper	VT050649-p65ADZp in attP40_VT044494-ZpGdbd in attP2	20170714_45_D5	asoy_is_screen_review	UAS_Chrimson_Venus_X_0070	A01	Tue Jan 16 14:27:51 EST 2018	155589	Fly Light	Sample#2493223783502970978	f		screen	Rubin	Yoshi Aso	JRC_IS18034-20170714_45_D5	Drosophila melanogaster	20x
IS18038	this paper	11A03-p65ADZp/ CyO in attP40_42A08-ZpGDBD in attP2	20150918_41_C3	nerna_is_screen_review	HAV5_X_0083	A01	Tue Oct 06 00:20:45 EDT 2015	112023	Fly Light	Sample#2191126412251889762	f		screen	Rubin	Aljoscha Nern	JRC_IS18038-20150918_41_C3	Drosophila melanogaster	20x
IS18040	this paper	11B12-p65ADZp in attP40_79H02-ZpGdbd in attP2	20150918_41_D4	nerna_is_screen_review	HAV5_X_0083	A01	Tue Oct 06 00:20:46 EDT 2015	112026	Fly Light	Sample#2191126413099139170	f		screen	Rubin	Aljoscha Nern	JRC_IS18040-20150918_41_D4	Drosophila melanogaster	20x
IS18041	this paper	11B12-p65ADZp in attP40_93A05-ZpGDBD in attP2	20150918_41_E1	nerna_is_screen_review	HAV5_X_0083	A01	Tue Oct 06 00:20:46 EDT 2015	112027	Fly Light	Sample#2191126413673758818	f		screen	Rubin	Aljoscha Nern	JRC_IS18041-20150918_41_E1	Drosophila melanogaster	20x
IS18043	this paper	w; 13D05-p65ADZp/ MKRS/TM6B_95F10-ZpGdbd in attP2	20150918_42_A1	nerna_is_screen_review	HAV5_X_0083	A01	Tue Oct 06 00:20:46 EDT 2015	112030	Fly Light	Sample#2191126414835581026	f		screen	Rubin	Aljoscha Nern	JRC_IS18043-20150918_42_A1	Drosophila melanogaster	20x
IS18044	this paper	14E12-p65ADZp in attP40; MKRS/TM6B_82C10-ZpGdbd in attP2	20170217_41_A1	nerna_is_screen_review	UAS_Chrimson_Venus_X_0070	A01	Tue Mar 07 09:28:44 EST 2017	145284	Fly Light	Sample#2378996330627334242	f		screen	Rubin	Aljoscha Nern	JRC_IS18044-20170217_41_A1	Drosophila melanogaster	20x
IS18048	this paper	VT008974-p65ADZp in attP40_52A05-ZpGdbd in attP2	20150918_41_G1	nerna_is_screen_review	HAV5_X_0083	A01	Tue Oct 06 00:20:47 EDT 2015	111931	Fly Light	Sample#2191126417444438114	f		screen	Rubin	Aljoscha Nern	JRC_IS18048-20150918_41_G1	Drosophila melanogaster	20x
IS18049	this paper	VT008462-p65ADZp in attP40_42A08-ZpGDBD in attP2	20150918_41_C1	nerna_is_screen_review	HAV5_X_0083	A01	Tue Oct 06 00:20:45 EDT 2015	111933	Fly Light	Sample#2191126411966677090	f		screen	Rubin	Aljoscha Nern	JRC_IS18049-20150918_41_C1	Drosophila melanogaster	20x
IS18050	this paper	VT010264-p65ADZp in attP40_41A08-ZpGdbd in attP2	20150918_42_C3	nerna_is_screen_review	HAV5_X_0083	A01	Tue Oct 06 00:20:47 EDT 2015	111935	Fly Light	Sample#2191126418300076130	f		screen	Rubin	Aljoscha Nern	JRC_IS18050-20150918_42_C3	Drosophila melanogaster	20x
IS18053	this paper	VT039305-p65ADZp in attP40_38A07-ZpGDBD in attP2	20150918_41_E6	nerna_is_screen_review	HAV5_X_0083	A01	Tue Oct 06 00:20:46 EDT 2015	111940	Fly Light	Sample#2191126415120793698	f		screen	Rubin	Aljoscha Nern	JRC_IS18053-20150918_41_E6	Drosophila melanogaster	20x
IS18055	this paper	VT049125-p65ADZp in attP40_11D02-ZpGDBD in attP2/TM3 (weak/TM3)	20150918_41_B4	nerna_is_screen_review	HAV5_X_0083	A01	Tue Oct 06 00:20:45 EDT 2015	111942	Fly Light	Sample#2191126411673075810	f		screen	Rubin	Aljoscha Nern	JRC_IS18055-20150918_41_B4	Drosophila melanogaster	20x
IS18058	this paper	VT057295-p65ADZp in attP40_51H04-ZpGDBD in attP2	20150918_41_D1	nerna_is_screen_review	HAV5_X_0083	A01	Tue Oct 06 00:20:45 EDT 2015	111946	Fly Light	Sample#2191126412532908130	f		screen	Rubin	Aljoscha Nern	JRC_IS18058-20150918_41_D1	Drosophila melanogaster	20x
IS18060	this paper	VT063300-p65ADZp in attP40_20F03-ZpGdbd in attP2	20150918_42_B5	nerna_is_screen_review	HAV5_X_0083	A01	Tue Oct 06 00:20:47 EDT 2015	111951	Fly Light	Sample#2191126417729650786	f		screen	Rubin	Aljoscha Nern	JRC_IS18060-20150918_42_B5	Drosophila melanogaster	20x
IS18062	this paper	VT063300-p65ADZp in attP40_49C03-ZpGdbd in attP2	20150918_42_I2	nerna_is_screen_review	HAV5_X_0083	A01	Tue Oct 06 00:20:48 EDT 2015	111953	Fly Light	Sample#2191126423211606114	f		screen	Rubin	Aljoscha Nern	JRC_IS18062-20150918_42_I2	Drosophila melanogaster	20x
IS18064	this paper	VT063300-p65ADZp in attP40_92D05-ZpGdbd in attP2	20150918_41_D6	nerna_is_screen_review	HAV5_X_0083	A01	Tue Oct 06 00:20:46 EDT 2015	111955	Fly Light	Sample#2191126413384351842	f		screen	Rubin	Aljoscha Nern	JRC_IS18064-20150918_41_D6	Drosophila melanogaster	20x
IS18070	this paper	VT042724-p65ADZp in attP40_92A10-ZpGdbd in attP2	20161111_52_I2	goldammerj_is_screen_review	UAS_Chrimson_Venus_X_0070	A00	Fri Dec 02 10:36:41 EST 2016	139686	Fly Light	Sample#2344586580586397733	f		screen	Terra Incognita	Jens Goldammer	JRC_IS18070-20161111_52_I2	Drosophila melanogaster	20x
IS18070	this paper	VT042724-p65ADZp in attP40_92A10-ZpGdbd in attP2	20150918_42_E5	nerna_is_screen_review	HAV5_X_0083	A01	Tue Oct 06 00:20:47 EDT 2015	111971	Fly Light	Sample#2191126420602749026	f		screen	Rubin	Aljoscha Nern	JRC_IS18070-20150918_42_E5	Drosophila melanogaster	20x
IS18071	this paper	VT044519-p65ADZ in attP40_38A07-ZpGDBD in attP2	20150918_41_F1	nerna_is_screen_review	HAV5_X_0083	A01	Tue Oct 06 00:20:46 EDT 2015	111973	Fly Light	Sample#2191126415687024738	f		screen	Rubin	Aljoscha Nern	JRC_IS18071-20150918_41_F1	Drosophila melanogaster	20x
IS18073	this paper	VT014724-p65ADZp in attP40_52A05-ZpGdbd in attP2	20150918_41_G2	nerna_is_screen_review	HAV5_X_0083	A01	Tue Oct 06 00:20:47 EDT 2015	111975	Fly Light	Sample#2191126418014863458	f		screen	Rubin	Aljoscha Nern	JRC_IS18073-20150918_41_G2	Drosophila melanogaster	20x
IS18074	this paper	VT014724-p65ADZp in attP40_89C01-ZpGdbd in attP2	20150918_41_I2	nerna_is_screen_review	HAV5_X_0083	A01	Tue Oct 06 00:20:47 EDT 2015	111976	Fly Light	Sample#2191126418593677410	f		screen	Rubin	Aljoscha Nern	JRC_IS18074-20150918_41_I2	Drosophila melanogaster	20x
IS18075	this paper	VT014724-p65ADZp in attP40_89H06-ZpGdbd in attP2	20150918_42_E3	nerna_is_screen_review	HAV5_X_0083	A01	Tue Oct 06 00:20:47 EDT 2015	111977	Fly Light	Sample#2191126420321730658	f		screen	Rubin	Aljoscha Nern	JRC_IS18075-20150918_42_E3	Drosophila melanogaster	20x
IS18080	this paper	VT007747-p65ADZp in attP40_11D02-ZpGDBD in attP2/TM3 (weak/TM3)	20150918_41_E3	nerna_is_screen_review	HAV5_X_0083	A01	Tue Oct 06 00:20:46 EDT 2015	111984	Fly Light	Sample#2191126413967360098	f		screen	Rubin	Aljoscha Nern	JRC_IS18080-20150918_41_E3	Drosophila melanogaster	20x
IS18082	this paper	VT044167-p65ADZp in attP40_38A07-ZpGDBD in attP2	20150918_41_F2	nerna_is_screen_review	HAV5_X_0083	A01	Tue Oct 06 00:20:46 EDT 2015	111987	Fly Light	Sample#2191126416270032994	f		screen	Rubin	Aljoscha Nern	JRC_IS18082-20150918_41_F2	Drosophila melanogaster	20x
IS18085	this paper	VT002026-p65ADZp in attP40_11D02-ZpGDBD in attP2/TM3 (weak/TM3)	20150918_41_E4	nerna_is_screen_review	HAV5_X_0083	A01	Tue Oct 06 00:20:46 EDT 2015	111991	Fly Light	Sample#2191126414273544290	f		screen	Rubin	Aljoscha Nern	JRC_IS18085-20150918_41_E4	Drosophila melanogaster	20x
IS18089	this paper	VT008153-p65ADZp in attP40_64F02-ZpGdbd in attP2	20150918_42_H4	nerna_is_screen_review	HAV5_X_0083	A01	Tue Oct 06 00:20:48 EDT 2015	112002	Fly Light	Sample#2191126422922199138	f		screen	Rubin	Aljoscha Nern	JRC_IS18089-20150918_42_H4	Drosophila melanogaster	20x
IS18090	this paper	VT008153-p65ADZp in attP40_69A01-ZpGdbd in attP2	20150918_42_H3	nerna_is_screen_review	HAV5_X_0083	A01	Tue Oct 06 00:20:48 EDT 2015	112003	Fly Light	Sample#2191126422632792162	f		screen	Rubin	Aljoscha Nern	JRC_IS18090-20150918_42_H3	Drosophila melanogaster	20x
IS18091	this paper	VT008153-p65ADZp in attP40_76E11-ZpGdbd in attP2	20150918_42_H1	nerna_is_screen_review	HAV5_X_0083	A01	Tue Oct 06 00:20:48 EDT 2015	112004	Fly Light	Sample#2191126422330802274	f		screen	Rubin	Aljoscha Nern	JRC_IS18091-20150918_42_H1	Drosophila melanogaster	20x
IS18097	this paper	VT047535-p65ADZ in attP40_24F06-ZpGdbd in attP2	20150918_42_B2	nerna_is_screen_review	HAV5_X_0083	A01	Tue Oct 06 00:20:46 EDT 2015	112014	Fly Light	Sample#2191126416559439970	f		screen	Rubin	Aljoscha Nern	JRC_IS18097-20150918_42_B2	Drosophila melanogaster	20x
IS18098	this paper	VT047535-p65ADZ in attP40_51H04-ZpGDBD in attP2	20150918_41_D2	nerna_is_screen_review	HAV5_X_0083	A01	Tue Oct 06 00:20:45 EDT 2015	112015	Fly Light	Sample#2191126412813926498	f		screen	Rubin	Aljoscha Nern	JRC_IS18098-20150918_41_D2	Drosophila melanogaster	20x
IS18099	this paper	VT048829-p65ADZp in attP40_11D02-ZpGDBD in attP2/TM3 (weak/TM3)	20150918_41_E5	nerna_is_screen_review	HAV5_X_0083	A01	Tue Oct 06 00:20:46 EDT 2015	112016	Fly Light	Sample#2191126414550368354	f		screen	Rubin	Aljoscha Nern	JRC_IS18099-20150918_41_E5	Drosophila melanogaster	20x
IS18102	this paper	VT058716-p65ADZp in attP40_92A10-ZpGdbd in attP2	20150918_42_E6	nerna_is_screen_review	HAV5_X_0083	A01	Tue Oct 06 00:20:47 EDT 2015	112020	Fly Light	Sample#2191126420892156002	f		screen	Rubin	Aljoscha Nern	JRC_IS18102-20150918_42_E6	Drosophila melanogaster	20x
IS18106	this paper	11D02-p65ADZp in attP40; MKRS/TM6B_VT048829-ZpGDBD in attP2	20150918_41_I4	nerna_is_screen_review	HAV5_X_0083	A01	Tue Oct 06 00:20:47 EDT 2015	112028	Fly Light	Sample#2191126418878890082	f		screen	Rubin	Aljoscha Nern	JRC_IS18106-20150918_41_I4	Drosophila melanogaster	20x
IS18107	this paper	24F06-p65ADZp in attP40_VT047535-ZpGdbd in attP2	20150918_42_A5	nerna_is_screen_review	HAV5_X_0083	A01	Tue Oct 06 00:20:46 EDT 2015	112032	Fly Light	Sample#2191126415976431714	f		screen	Rubin	Aljoscha Nern	JRC_IS18107-20150918_42_A5	Drosophila melanogaster	20x
IS18108	this paper	VT008462-p65ADZp in attP40_VT014430-ZpGdbd in attP2	20150918_41_A1	nerna_is_screen_review	HAV5_X_0083	A01	Tue Oct 06 00:20:45 EDT 2015	111932	Fly Light	Sample#2191126411379474530	f		screen	Rubin	Aljoscha Nern	JRC_IS18108-20150918_41_A1	Drosophila melanogaster	20x
IS18109	this paper	VT010264-p65ADZp in attP40_VT002033-ZpGdbd in attP2	20150918_42_F4	nerna_is_screen_review	HAV5_X_0083	A01	Tue Oct 06 00:20:48 EDT 2015	111934	Fly Light	Sample#2191126421475164258	f		screen	Rubin	Aljoscha Nern	JRC_IS18109-20150918_42_F4	Drosophila melanogaster	20x
IS18112	this paper	VT057295-p65ADZp in attP40_VT047535-ZpGdbd in attP2	20150918_42_A4	nerna_is_screen_review	HAV5_X_0083	A01	Tue Oct 06 00:20:46 EDT 2015	111944	Fly Light	Sample#2191126415397617762	f		screen	Rubin	Aljoscha Nern	JRC_IS18112-20150918_42_A4	Drosophila melanogaster	20x
IS18113	this paper	VT063300-p65ADZp in attP40_VT063300-ZpGdbd in attP2	20150918_42_D4	nerna_is_screen_review	HAV5_X_0083	A01	Tue Oct 06 00:20:47 EDT 2015	111947	Fly Light	Sample#2191126420032323682	f		screen	Rubin	Aljoscha Nern	JRC_IS18113-20150918_42_D4	Drosophila melanogaster	20x
IS18125	this paper	VT042724-p65ADZp in attP40_VT058716-ZpGdbd in attP2	20150918_41_I6	nerna_is_screen_review	HAV5_X_0083	A01	Tue Oct 06 00:20:47 EDT 2015	111970	Fly Light	Sample#2191126419457704034	f		screen	Rubin	Aljoscha Nern	JRC_IS18125-20150918_41_I6	Drosophila melanogaster	20x
IS18128	this paper	VT002033-p65ADZp in attP40_VT010264-ZpGDBD in attP2	20150918_42_C5	nerna_is_screen_review	HAV5_X_0083	A01	Tue Oct 06 00:20:47 EDT 2015	111979	Fly Light	Sample#2191126419168297058	f		screen	Rubin	Aljoscha Nern	JRC_IS18128-20150918_42_C5	Drosophila melanogaster	20x
IS18134	this paper	VT008153-p65ADZp in attP40_VT048416-ZpGdbd in attP2	20150918_42_D2	nerna_is_screen_review	HAV5_X_0083	A01	Tue Oct 06 00:20:47 EDT 2015	111997	Fly Light	Sample#2191126419747111010	f		screen	Rubin	Aljoscha Nern	JRC_IS18134-20150918_42_D2	Drosophila melanogaster	20x
IS18135	this paper	VT008153-p65ADZp in attP40_VT040575-ZpGdbd in attP2	20150918_42_G3	nerna_is_screen_review	HAV5_X_0083	A01	Tue Oct 06 00:20:48 EDT 2015	111998	Fly Light	Sample#2191126422045589602	f		screen	Rubin	Aljoscha Nern	JRC_IS18135-20150918_42_G3	Drosophila melanogaster	20x
IS18136	this paper	VT008153-p65ADZp in attP40_VT043014-ZpGDBD in attP2	20150918_42_F1	nerna_is_screen_review	HAV5_X_0083	A01	Tue Oct 06 00:20:47 EDT 2015	111999	Fly Light	Sample#2191126421185757282	f		screen	Rubin	Aljoscha Nern	JRC_IS18136-20150918_42_F1	Drosophila melanogaster	20x
IS18137	this paper	VT008153-p65ADZp in attP40_VT013872-ZpGDBD in attP2	20150918_42_B3	nerna_is_screen_review	HAV5_X_0083	A01	Tue Oct 06 00:20:47 EDT 2015	112000	Fly Light	Sample#2191126417142448226	f		screen	Rubin	Aljoscha Nern	JRC_IS18137-20150918_42_B3	Drosophila melanogaster	20x
IS18142	this paper	VT058716-p65ADZp in attP40_VT042724-ZpGDBD in attP2	20150918_42_G2	nerna_is_screen_review	HAV5_X_0083	A01	Tue Oct 06 00:20:48 EDT 2015	112019	Fly Light	Sample#2191126421760376930	f		screen	Rubin	Aljoscha Nern	JRC_IS18142-20150918_42_G2	Drosophila melanogaster	20x
IS18354	this paper	w; 10F10-p65ADZp; MKRS/TM6B_10F08-ZpGdbd in attP2	20190222_43_H5	ditp_is_screen_review	UAS_Chrimson_Venus_X_0070	A01	Fri Mar 22 13:39:11 EDT 2019	186697	Fly Light	Sample#2649023219331235938	f		screen	Descending Interneuron	Shigehiro Namiki	JRC_IS18354-20190222_43_H5	Drosophila melanogaster	20x
IS18445	this paper	w; 80G04-p65ADZp; MKRS/ TM6B_32C05-ZpGdbd in attP2	20210402_41_G4	nerna_is_screen_review	UAS_Chrimson_Venus_X_0070	A01	Wed Apr 14 17:00:14 EDT 2021	224869	Fly Light	Sample#2922314263437508706	f		screen	Rubin	Aljoscha Nern	JRC_IS18445-20210402_41_G4	Drosophila melanogaster	20x
IS18624	this paper	12G03-p65ADZp in attP40_10F08-ZpGdbd in attP2	20151002_51_A1	goldammerj_is_screen_review	UAS_Chrimson_Venus_X_0070	A00	Wed Oct 21 14:01:15 EDT 2015	113246	Fly Light	Sample#2196768714777428066	f		screen	Terra Incognita	Jens Goldammer	JRC_IS18624-20151002_51_A1	Drosophila melanogaster	20x
IS18641	this paper	16H01-p65ADZp in attP40; MKRS/TM6B_HAV5; CyO/Sco; 14B02-ZpGDBD in attP2	20190517_44_C4	ditp_is_screen_review	UAS_Chrimson_Venus_X_0070	A01	Tue Jul 23 18:10:44 EDT 2019	191948	Fly Light	Sample#2693665264666411106	f		screen	Descending Interneuron	Shigehiro Namiki	JRC_IS18641-20190517_44_C4	Drosophila melanogaster	20x
IS18867	this paper	w; 10F08-p65ADZp; MKRS/ TM6B_10F08-ZpGdbd in attP2	20151002_42_J5	nerna_is_screen_review	UAS_Chrimson_Venus_X_0070	A01	Wed Oct 21 14:02:28 EDT 2015	112667	Fly Light	Sample#2196769019959181410	f		screen	Rubin	Aljoscha Nern	JRC_IS18867-20151002_42_J5	Drosophila melanogaster	20x
IS18907	this paper	30E11-p65ADZp /CyO in attP40_21C11-ZpGdbd in attP2	20200228_43_F3	minegishir_is_screen_review	UAS_Chrimson_Venus_X_0070	A01	Fri Jun 05 17:19:40 EDT 2020	209393	Fly Light	Sample#2808891750783909986	f		screen	Dickson	Ryo Minegishi	JRC_IS18907-20200228_43_F3	Drosophila melanogaster	20x
IS18973	this paper	w; 80G04-p65ADZp; MKRS/ TM6B_HAV5; CyO/Sp; 80G04-ZpGDBD in attP2	20160902_42_F6	nerna_is_screen_review	UAS_Chrimson_Venus_X_0070	A01	Thu Sep 22 09:21:16 EDT 2016	133808	Fly Light	Sample#2318822964608368785	f		screen	Rubin	Aljoscha Nern	JRC_IS18973-20160902_42_F6	Drosophila melanogaster	20x
IS19088	this paper	35A03-p65ADZp in attP40; MKRS/TM6B_VT008485-ZpGdbd in attP2	20210528_48_C1	asoy_is_screen_review	UAS_Chrimson_Venus_X_0070	A01	Fri Aug 06 12:36:10 EDT 2021	228429	Fly Light	Sample#2963560025760464994	f		screen	Aso	Yoshi Aso	JRC_IS19088-20210528_48_C1	Drosophila melanogaster	20x
IS19188	this paper	VT045617-p65ADZp in attP40_VT033301-ZpGdbd in attP2	20210430_42_F4	nerna_is_screen_review	UAS_Chrimson_Venus_X_0070	A01	Mon May 17 16:39:11 EDT 2021	226569	Fly Light	Sample#2934267765122400354	f		screen	Rubin	Aljoscha Nern	JRC_IS19188-20210430_42_F4	Drosophila melanogaster	20x
IS19364	this paper	14C08-p65ADZp in attP40/ CyO (backcrossed to CSMH for 5 gen)_VT026018-ZpGDBD in attP2	20200313_43_H6	rubing_is_screen_review	UAS_Chrimson_Venus_X_0070	A	Wed Jul 08 09:59:05 EDT 2020	210385	Fly Light	Sample#2820739676984311906	f		screen	Rubin	Gerry Rubin	JRC_IS19364-20200313_43_H6	Drosophila melanogaster	20x
IS19425	this paper	VT028551-p65ADZp in attP40_VT049130-ZpGDBD in attP2	20181130_48_C3	rubing_wolfft_is_screen_review	UAS_Chrimson_Venus_X_0070	A01	Tue Dec 18 16:27:51 EST 2018	182477	Fly Light	Sample#2615016304347709538	f		screen	Rubin	Tanya Wolff	JRC_IS19425-20181130_48_C3	Drosophila melanogaster	20x
IS20046	this paper	VT000355-p65ADZp in attP40_21E02-ZpGdbd in attP2	20170922_43_B4	rubing_wolfft_is_screen_review	UAS_Chrimson_Venus_X_0070	A01	Mon Oct 16 15:12:21 EDT 2017	159372	Fly Light	Sample#2459880196673634402	f		screen	Rubin	Tanya Wolff	JRC_IS20046-20170922_43_B4	Drosophila melanogaster	20x
IS20138	this paper	VT014961-p65ADZp in attP40_HAV5; CyO/Sco; 31E06-ZpGDBD in attP2	20190412_41_F3	ditp_is_screen_review	UAS_Chrimson_Venus_X_0070	A01	Mon May 06 16:37:52 EDT 2019	189678	Fly Light	Sample#2665375639057465442	f		screen	Descending Interneuron	Shigehiro Namiki	JRC_IS20138-20190412_41_F3	Drosophila melanogaster	20x
IS20247	this paper	30H02-p65ADZp in attP40; MKRS/TM6B_41G09-ZpGDBD in attP2	20160422_42_C3	nerna_is_screen_review	UAS_Chrimson_Venus_X_0070	A01	Fri Jun 03 15:16:46 EDT 2016	125220	Fly Light	Sample#2278687372650479653	f		screen	Rubin	Aljoscha Nern	JRC_IS20247-20160422_42_C3	Drosophila melanogaster	20x
IS20265	this paper	VT032336-p65ADZ in attP40_VT050658-ZpGDBD in attP2	20160909_41_D2	dicksonb_is_screen_review	HAV5_X_0083	A01	Tue Oct 04 09:15:19 EDT 2016	133961	Fly Light	Sample#2323170120039399569	m		screen	Dickson	Barry Dickson	JRC_IS20265-20160909_41_D2	Drosophila melanogaster	20x
IS20268	this paper	VT064562-p65ADZp in attP40_VT044946-ZpGdbd in attP2	20170728_45_E4	dicksonb_is_screen_review	UAS_Chrimson_Venus_X_0070	A01	Tue Aug 22 14:48:22 EDT 2017	156446	Fly Light	Sample#2439942830597079138	m		screen	Dickson	Ryo Minegishi	JRC_IS20268-20170728_45_E4	Drosophila melanogaster	20x
IS20739	this paper	VT044494-p65ADZp in attP40_VT044964-ZpGdbd in attP2	20161216_44_E5	dicksonb_is_screen_review	HAV5_X_0083	A01	Mon Jan 09 14:45:16 EST 2017	141124	Fly Light	Sample#2358419879805059170	m		screen	Dickson	Ryo Minegishi	JRC_IS20739-20161216_44_E5	Drosophila melanogaster	20x
IS20745	this paper	VT044964-p65ADZp in attP40_VT046303-ZpGDBD in attP2	20161216_44_A1	dicksonb_is_screen_review	HAV5_X_0083	A01	Mon Jan 09 14:45:16 EST 2017	141146	Fly Light	Sample#2358419877775016034	m		screen	Dickson	Ryo Minegishi	JRC_IS20745-20161216_44_A1	Drosophila melanogaster	20x
IS20747	this paper	26C06-p65ADZp in attP40; MKRS/TM6B_54G12-ZpGdbd /TM3 in attP2	20210108_46_B4	minegishir_is_screen_review	UAS_Chrimson_Venus_X_0070	A01	Tue Jan 26 13:53:34 EST 2021	219377	Fly Light	Sample#2894016133885591650	f		screen	Dickson	Ryo Minegishi	JRC_IS20747-20210108_46_B4	Drosophila melanogaster	20x
IS20804	this paper	VT019718-p65ADZp in attP40_75F06-ZpGdbd in attP2	20190906_41_C4	rubing_wolfft_is_screen_review	UAS_Chrimson_Venus_X_0070	A01	Tue Oct 01 15:58:50 EDT 2019	199141	Fly Light	Sample#2718999220630585442	f		screen	Rubin	Tanya Wolff	JRC_IS20804-20190906_41_C4	Drosophila melanogaster	20x
IS20834	this paper	22H01-p65ADZp in attP40; MKRS/TM6B_HAV5; CyO/Sco; 22E06-ZpGDBD in attP2	20210326_48_D2	minegishir_is_screen_review	UAS_Chrimson_Venus_X_0070	A01	Fri Apr 09 16:58:42 EDT 2021	224056	Fly Light	Sample#2920501937960910946	f		screen	Dickson	Ryo Minegishi	JRC_IS20834-20210326_48_D2	Drosophila melanogaster	20x
IS20857	this paper	VT032228-p65ADZp in attP40_VT042478-ZpGDBD in attP2	20160909_41_D4	dicksonb_is_screen_review	HAV5_X_0083	A01	Tue Oct 04 09:15:19 EDT 2016	133962	Fly Light	Sample#2323170120282669201	m		screen	Dickson	Barry Dickson	JRC_IS20857-20160909_41_D4	Drosophila melanogaster	20x
IS20920	this paper	w; 56H09-p65ADZ; MKRS/TM6B_30A07-ZpGdbd in attP2	20150911_51_A1	goldammerj_is_screen_review	UAS_Chrimson_Venus_X_0070	A02	Fri Sep 25 14:51:36 EDT 2015	112333	Fly Light	Sample#2187359300215636066	f		screen	Terra Incognita	Jens Goldammer	JRC_IS20920-20150911_51_A1	Drosophila melanogaster	20x
IS20921	this paper	w; 56H09-p65ADZ; MKRS/TM6B_49A11-ZpGdbd in attP2	20150911_51_A2	goldammerj_is_screen_review	UAS_Chrimson_Venus_X_0070	A02	Fri Sep 25 14:51:36 EDT 2015	112334	Fly Light	Sample#2187359302639943778	f		screen	Terra Incognita	Jens Goldammer	JRC_IS20921-20150911_51_A2	Drosophila melanogaster	20x
IS20922	this paper	65G08-p65ADZp in attP40_30A07-ZpGdbd in attP2	20150911_51_C4	goldammerj_is_screen_review	UAS_Chrimson_Venus_X_0070	A02	Fri Sep 25 14:51:37 EDT 2015	112335	Fly Light	Sample#2187359304560935010	f		screen	Terra Incognita	Jens Goldammer	JRC_IS20922-20150911_51_C4	Drosophila melanogaster	20x
IS20923	this paper	65G08-p65ADZp in attP40_49A11-ZpGdbd in attP2	20150911_51_B2	goldammerj_is_screen_review	UAS_Chrimson_Venus_X_0070	A02	Fri Sep 25 14:51:37 EDT 2015	112336	Fly Light	Sample#2187359303218757730	f		screen	Terra Incognita	Jens Goldammer	JRC_IS20923-20150911_51_B2	Drosophila melanogaster	20x
IS20924	this paper	65G08-p65ADZp in attP40_64G09-ZpGdbd in attP2	20150911_51_B1	goldammerj_is_screen_review	UAS_Chrimson_Venus_X_0070	A02	Fri Sep 25 14:51:36 EDT 2015	112337	Fly Light	Sample#2187359302899990626	f		screen	Terra Incognita	Jens Goldammer	JRC_IS20924-20150911_51_B1	Drosophila melanogaster	20x
IS20925	this paper	65G11-p65ADZp in attP40_30A07-ZpGdbd in attP2	20150911_51_B3	goldammerj_is_screen_review	UAS_Chrimson_Venus_X_0070	A02	Fri Sep 25 14:51:37 EDT 2015	112338	Fly Light	Sample#2187359303487193186	f		screen	Terra Incognita	Jens Goldammer	JRC_IS20925-20150911_51_B3	Drosophila melanogaster	20x
IS20926	this paper	65G11-p65ADZp in attP40_49A11-ZpGdbd in attP2	20150911_51_C1	goldammerj_is_screen_review	UAS_Chrimson_Venus_X_0070	A02	Fri Sep 25 14:51:37 EDT 2015	112339	Fly Light	Sample#2187359303747240034	f		screen	Terra Incognita	Jens Goldammer	JRC_IS20926-20150911_51_C1	Drosophila melanogaster	20x
IS20927	this paper	65G11-p65ADZp in attP40_64G09-ZpGdbd in attP2	20150911_51_C2	goldammerj_is_screen_review	UAS_Chrimson_Venus_X_0070	A02	Fri Sep 25 14:51:37 EDT 2015	112340	Fly Light	Sample#2187359304019869794	f		screen	Terra Incognita	Jens Goldammer	JRC_IS20927-20150911_51_C2	Drosophila melanogaster	20x
IS20928	this paper	65G11-p65ADZp in attP40_HAV5; CyO/Sco; 56H09-ZpGDBD in attP2	20150911_51_C3	goldammerj_is_screen_review	UAS_Chrimson_Venus_X_0070	A02	Fri Sep 25 14:51:37 EDT 2015	112341	Fly Light	Sample#2187359304279916642	f		screen	Terra Incognita	Jens Goldammer	JRC_IS20928-20150911_51_C3	Drosophila melanogaster	20x
IS20929	this paper	53G02-p65ADZp in attP40_49A11-ZpGdbd in attP2	20150911_51_D1	goldammerj_is_screen_review	UAS_Chrimson_Venus_X_0070	A02	Fri Sep 25 14:51:37 EDT 2015	112342	Fly Light	Sample#2187359304829370466	f		screen	Terra Incognita	Jens Goldammer	JRC_IS20929-20150911_51_D1	Drosophila melanogaster	20x
IS20930	this paper	53G02-p65ADZp in attP40_64G09-ZpGdbd in attP2	20150911_51_D5	goldammerj_is_screen_review	UAS_Chrimson_Venus_X_0070	A02	Fri Sep 25 14:51:37 EDT 2015	112343	Fly Light	Sample#2187359305357852770	f		screen	Terra Incognita	Jens Goldammer	JRC_IS20930-20150911_51_D5	Drosophila melanogaster	20x
IS20931	this paper	37F03-p65ADZp in attP40_72C10-ZpGdbd in attP2	20150911_51_D3	goldammerj_is_screen_review	UAS_Chrimson_Venus_X_0070	A02	Fri Sep 25 14:51:37 EDT 2015	112344	Fly Light	Sample#2187359305093611618	f		screen	Terra Incognita	Jens Goldammer	JRC_IS20931-20150911_51_D3	Drosophila melanogaster	20x
IS20932	this paper	37F03-p65ADZp in attP40_44H01-ZpGdbd in attP2	20150911_51_E1	goldammerj_is_screen_review	UAS_Chrimson_Venus_X_0070	A02	Fri Sep 25 14:51:37 EDT 2015	112345	Fly Light	Sample#2187359305626288226	f		screen	Terra Incognita	Jens Goldammer	JRC_IS20932-20150911_51_E1	Drosophila melanogaster	20x
IS20933	this paper	VT040005-p65ADZp in attP40_VT017183-ZpGDBD in attP2	20150911_51_E2	goldammerj_is_screen_review	UAS_Chrimson_Venus_X_0070	A02	Fri Sep 25 14:51:37 EDT 2015	112346	Fly Light	Sample#2187359305907306594	f		screen	Terra Incognita	Jens Goldammer	JRC_IS20933-20150911_51_E2	Drosophila melanogaster	20x
IS20933	this paper	VT040005-p65ADZp in attP40_VT017183-ZpGDBD in attP2	20160304_42_G2	nerna_is_screen_review	HAV5_X_0083	A01	Wed Mar 30 00:30:45 EDT 2016	122326	Fly Light	Sample#2254909190772359242	f		screen	Rubin	Aljoscha Nern	JRC_IS20933-20160304_42_G2	Drosophila melanogaster	20x
IS20934	this paper	VT040005-p65ADZp in attP40_VT016971-ZpGDBD in attP2	20150911_51_E3	goldammerj_is_screen_review	UAS_Chrimson_Venus_X_0070	A02	Fri Sep 25 14:51:37 EDT 2015	112347	Fly Light	Sample#2187359306167353442	f		screen	Terra Incognita	Jens Goldammer	JRC_IS20934-20150911_51_E3	Drosophila melanogaster	20x
IS20935	this paper	VT024620-p65ADZp in attP40_VT008191-ZpGdbd in attP2	20150911_51_F1	goldammerj_is_screen_review	UAS_Chrimson_Venus_X_0070	A02	Fri Sep 25 14:51:37 EDT 2015	112348	Fly Light	Sample#2187359306431594594	f		screen	Terra Incognita	Jens Goldammer	JRC_IS20935-20150911_51_F1	Drosophila melanogaster	20x
IS20936	this paper	VT024620-p65ADZp in attP40_VT050157-ZpGdbd in attP2	20150911_51_F2	goldammerj_is_screen_review	UAS_Chrimson_Venus_X_0070	A02	Fri Sep 25 14:51:37 EDT 2015	112349	Fly Light	Sample#2187359306695835746	f		screen	Terra Incognita	Jens Goldammer	JRC_IS20936-20150911_51_F2	Drosophila melanogaster	20x
IS20937	this paper	VT024620-p65ADZp in attP40_VT018834-ZpGdbd in attP2	20150911_51_F3	goldammerj_is_screen_review	UAS_Chrimson_Venus_X_0070	A02	Fri Sep 25 14:51:37 EDT 2015	112350	Fly Light	Sample#2187359306955882594	f		screen	Terra Incognita	Jens Goldammer	JRC_IS20937-20150911_51_F3	Drosophila melanogaster	20x
IS20959	this paper	25D01-p65ADZp in VK00027_VT007747-ZpGDBD in attP2	20150925_42_A5	nerna_is_screen_review	HAV5_X_0083	A01	Mon Oct 12 16:49:40 EDT 2015	112429	Fly Light	Sample#2193549607164706914	f		screen	Rubin	Aljoscha Nern	JRC_IS20959-20150925_42_A5	Drosophila melanogaster	20x
IS20960	this paper	25D01-p65ADZp in VK00027_VT048829-ZpGDBD in attP2	20150925_42_B4	nerna_is_screen_review	HAV5_X_0083	A01	Mon Oct 12 16:49:40 EDT 2015	112430	Fly Light	Sample#2193549607827406946	f		screen	Rubin	Aljoscha Nern	JRC_IS20960-20150925_42_B4	Drosophila melanogaster	20x
IS20961	this paper	25D01-p65ADZp in VK00027_11D02-ZpGDBD in attP2/TM3 (weak/TM3)	20150925_42_A6	nerna_is_screen_review	HAV5_X_0083	A01	Mon Oct 12 16:49:40 EDT 2015	112431	Fly Light	Sample#2193549607487668322	f		screen	Rubin	Aljoscha Nern	JRC_IS20961-20150925_42_A6	Drosophila melanogaster	20x
IS20963	this paper	25D01-p65ADZp in su(Hw)attP8_11D02-ZpGDBD in attP2/TM3 (weak/TM3)	20150925_42_A1	nerna_is_screen_review	HAV5_X_0083	A01	Mon Oct 12 16:49:40 EDT 2015	112433	Fly Light	Sample#2193549606820773986	f		screen	Rubin	Aljoscha Nern	JRC_IS20963-20150925_42_A1	Drosophila melanogaster	20x
IS20966	this paper	25D01-p65ADZp in attP40_VT007747-ZpGDBD in attP2	20150925_43_D2	nerna_is_screen_review	HAV5_X_0083	A01	Sat Oct 10 11:23:48 EDT 2015	112436	Fly Light	Sample#2192742825374777442	f		screen	Rubin	Aljoscha Nern	JRC_IS20966-20150925_43_D2	Drosophila melanogaster	20x
IS20967	this paper	25D01-p65ADZp in attP40_VT048829-ZpGDBD in attP2	20150925_43_G6	nerna_is_screen_review	HAV5_X_0083	A01	Sat Oct 10 11:23:52 EDT 2015	112437	Fly Light	Sample#2192742842760167522	f		screen	Rubin	Aljoscha Nern	JRC_IS20967-20150925_43_G6	Drosophila melanogaster	20x
IS20968	this paper	25D01-p65ADZp in attP40_11D02-ZpGDBD in attP2/TM3 (weak/TM3)	20150925_42_G2	nerna_is_screen_review	HAV5_X_0083	A01	Mon Oct 12 16:49:42 EDT 2015	112438	Fly Light	Sample#2193549616614473826	f		screen	Rubin	Aljoscha Nern	JRC_IS20968-20150925_42_G2	Drosophila melanogaster	20x
IS20970	this paper	31D07-p65ADZp in attP40_VT014430-ZpGdbd in attP2	20150925_43_A2	nerna_is_screen_review	HAV5_X_0083	A01	Sat Oct 10 11:23:47 EDT 2015	112440	Fly Light	Sample#2192742820979146850	f		screen	Rubin	Aljoscha Nern	JRC_IS20970-20150925_43_A2	Drosophila melanogaster	20x
IS20972	this paper	31D07-p65ADZp in attP40_95F10-ZpGdbd in attP2	20150925_43_B2	nerna_is_screen_review	HAV5_X_0083	A01	Sat Oct 10 11:23:47 EDT 2015	112442	Fly Light	Sample#2192742821969002594	f		screen	Rubin	Aljoscha Nern	JRC_IS20972-20150925_43_B2	Drosophila melanogaster	20x
IS20974	this paper	41A08-p65ADZp in attP40_VT010264-ZpGDBD in attP2	20150925_43_E2	nerna_is_screen_review	HAV5_X_0083	A01	Sat Oct 10 11:23:48 EDT 2015	112444	Fly Light	Sample#2192742826360438882	f		screen	Rubin	Aljoscha Nern	JRC_IS20974-20150925_43_E2	Drosophila melanogaster	20x
IS20980	this paper	46F09-p65ADZp_VT042724-ZpGDBD in attP2	20150925_43_C3	nerna_is_screen_review	HAV5_X_0083	A01	Sat Oct 10 11:23:48 EDT 2015	112450	Fly Light	Sample#2192742823709638754	f		screen	Rubin	Aljoscha Nern	JRC_IS20980-20150925_43_C3	Drosophila melanogaster	20x
IS20981	this paper	46F09-p65ADZp_VT058716-ZpGdbd in attP2	20150925_43_C6	nerna_is_screen_review	HAV5_X_0083	A01	Sat Oct 10 11:23:48 EDT 2015	112451	Fly Light	Sample#2192742824699494498	f		screen	Rubin	Aljoscha Nern	JRC_IS20981-20150925_43_C6	Drosophila melanogaster	20x
IS20982	this paper	46F09-p65ADZp_92A10-ZpGdbd in attP2	20150925_43_A6	nerna_is_screen_review	HAV5_X_0083	A01	Sat Oct 10 11:23:47 EDT 2015	112452	Fly Light	Sample#2192742821306302562	f		screen	Rubin	Aljoscha Nern	JRC_IS20982-20150925_43_A6	Drosophila melanogaster	20x
IS20983	this paper	52A05-p65ADZp in JK22C_VT008974-pZpGdbd in attP2	20150925_43_B3	nerna_is_screen_review	HAV5_X_0083	A01	Sat Oct 10 11:23:48 EDT 2015	112453	Fly Light	Sample#2192742822300352610	f		screen	Rubin	Aljoscha Nern	JRC_IS20983-20150925_43_B3	Drosophila melanogaster	20x
IS20984	this paper	52A05-p65ADZp in JK22C_VT003232-ZpGdbd in attP2	20150925_42_D5	nerna_is_screen_review	HAV5_X_0083	A01	Mon Oct 12 16:49:42 EDT 2015	112454	Fly Light	Sample#2193549614987083874	f		screen	Rubin	Aljoscha Nern	JRC_IS20984-20150925_42_D5	Drosophila melanogaster	20x
IS20985	this paper	52A05-p65ADZp in JK22C_VT014724-ZpGDBD in attP2	20150925_42_C6	nerna_is_screen_review	HAV5_X_0083	A01	Mon Oct 12 16:49:42 EDT 2015	112455	Fly Light	Sample#2193549614227914850	f		screen	Rubin	Aljoscha Nern	JRC_IS20985-20150925_42_C6	Drosophila melanogaster	20x
IS20987	this paper	52A05-p65ADZp in JK22C_VT032162-ZpGdbd in attP2	20150925_43_C1	nerna_is_screen_review	HAV5_X_0083	A01	Sat Oct 10 11:23:48 EDT 2015	112457	Fly Light	Sample#2192742823046938722	f		screen	Rubin	Aljoscha Nern	JRC_IS20987-20150925_43_C1	Drosophila melanogaster	20x
IS20989	this paper	52A05-p65ADZp in JK22C_48H01-ZpGdbd in attP2	20150925_43_F2	nerna_is_screen_review	HAV5_X_0083	A01	Sat Oct 10 11:23:52 EDT 2015	112459	Fly Light	Sample#2192742841195692130	f		screen	Rubin	Aljoscha Nern	JRC_IS20989-20150925_43_F2	Drosophila melanogaster	20x
IS20990	this paper	52A05-p65ADZp in JK22C_55B09-ZpGdbd in attP2	20150925_43_F5	nerna_is_screen_review	HAV5_X_0083	A01	Sat Oct 10 11:23:52 EDT 2015	112460	Fly Light	Sample#2192742841556402274	f		screen	Rubin	Aljoscha Nern	JRC_IS20990-20150925_43_F5	Drosophila melanogaster	20x
IS20991	this paper	52A05-p65ADZp in JK22C_70F05-ZpGdbd in attP2	20150925_43_G1	nerna_is_screen_review	HAV5_X_0083	A01	Sat Oct 10 11:23:52 EDT 2015	112461	Fly Light	Sample#2192742841883557986	f		screen	Rubin	Aljoscha Nern	JRC_IS20991-20150925_43_G1	Drosophila melanogaster	20x
IS20992	this paper	52A05-p65ADZp in JK22C_79H02-ZpGdbd in attP2	20150925_43_G4	nerna_is_screen_review	HAV5_X_0083	A01	Sat Oct 10 11:23:52 EDT 2015	112462	Fly Light	Sample#2192742842164576354	f		screen	Rubin	Aljoscha Nern	JRC_IS20992-20150925_43_G4	Drosophila melanogaster	20x
IS20993	this paper	52A05-p65ADZp in JK22C_80E07-ZpGdbd in attP2	20150925_42_F4	nerna_is_screen_review	HAV5_X_0083	A01	Mon Oct 12 16:49:42 EDT 2015	112463	Fly Light	Sample#2193549615951773794	f		screen	Rubin	Aljoscha Nern	JRC_IS20993-20150925_42_F4	Drosophila melanogaster	20x
IS20994	this paper	52A05-p65ADZp in JK22C_89C01-ZpGdbd in attP2	20150925_43_E1	nerna_is_screen_review	HAV5_X_0083	A01	Sat Oct 10 11:23:48 EDT 2015	112464	Fly Light	Sample#2192742826033283170	f		screen	Rubin	Aljoscha Nern	JRC_IS20994-20150925_43_E1	Drosophila melanogaster	20x
IS20995	this paper	52A05-p65ADZp in JK22C_89H06-ZpGdbd in attP2	20150925_42_H3	nerna_is_screen_review	HAV5_X_0083	A01	Mon Oct 12 16:49:42 EDT 2015	112465	Fly Light	Sample#2193549616983572578	f		screen	Rubin	Aljoscha Nern	JRC_IS20995-20150925_42_H3	Drosophila melanogaster	20x
IS20996	this paper	52A05-p65ADZp in JK22C_93A05-ZpGDBD in attP2	20150925_43_B1	nerna_is_screen_review	HAV5_X_0083	A01	Sat Oct 10 11:23:47 EDT 2015	112466	Fly Light	Sample#2192742821633458274	f		screen	Rubin	Aljoscha Nern	JRC_IS20996-20150925_43_B1	Drosophila melanogaster	20x
IS21002	this paper	58G11-p65ADZp in attP40; MKRS/TM6B_VT019398-ZpGdbd in attP2	20150925_43_B6	nerna_is_screen_review	HAV5_X_0083	A01	Sat Oct 10 11:23:48 EDT 2015	112472	Fly Light	Sample#2192742822640091234	f		screen	Rubin	Aljoscha Nern	JRC_IS21002-20150925_43_B6	Drosophila melanogaster	20x
IS21006	this paper	60A10-p65ADZp in attP40_38A07-ZpGDBD in attP2	20150925_43_I1	nerna_is_screen_review	HAV5_X_0083	A01	Sat Oct 10 11:23:53 EDT 2015	112476	Fly Light	Sample#2192742844005875810	f		screen	Rubin	Aljoscha Nern	JRC_IS21006-20150925_43_I1	Drosophila melanogaster	20x
IS21011	this paper	70G12-p65ADZp in attP40_52A05-ZpGdbd in attP2	20150925_43_D3	nerna_is_screen_review	HAV5_X_0083	A01	Sat Oct 10 11:23:48 EDT 2015	112482	Fly Light	Sample#2192742825706127458	f		screen	Rubin	Aljoscha Nern	JRC_IS21011-20150925_43_D3	Drosophila melanogaster	20x
IS21024	this paper	82C10-p65ADZp in VK00027_14E12-ZpGdbd in attP2	20150925_42_B6	nerna_is_screen_review	HAV5_X_0083	A01	Mon Oct 12 16:49:41 EDT 2015	112495	Fly Light	Sample#2193549613204504674	f		screen	Rubin	Aljoscha Nern	JRC_IS21024-20150925_42_B6	Drosophila melanogaster	20x
IS21025	this paper	82C10-p65ADZp in attP40; MKRS/TM6B_14E12-ZpGdbd in attP2	20150925_42_F5	nerna_is_screen_review	HAV5_X_0083	A01	Mon Oct 12 16:49:42 EDT 2015	112496	Fly Light	Sample#2193549616274735202	f		screen	Rubin	Aljoscha Nern	JRC_IS21025-20150925_42_F5	Drosophila melanogaster	20x
IS21027	this paper	85F11-p65ADZp in attP40; MKRS/TM6B_41C05-ZpGdbd in attP2	20150925_43_I2	nerna_is_screen_review	HAV5_X_0083	A01	Sat Oct 10 11:23:53 EDT 2015	112498	Fly Light	Sample#2192742844316254306	f		screen	Rubin	Aljoscha Nern	JRC_IS21027-20150925_43_I2	Drosophila melanogaster	20x
IS21032	this paper	89F06-p65ADZp in attP40_VT002033-ZpGdbd in attP2	20150925_43_E6	nerna_is_screen_review	HAV5_X_0083	A01	Sat Oct 10 11:23:50 EDT 2015	112503	Fly Light	Sample#2192742834174427234	f		screen	Rubin	Aljoscha Nern	JRC_IS21032-20150925_43_E6	Drosophila melanogaster	20x
IS21035	this paper	w; 89G07-p65ADZ; MKRS/TM6B_VT002015-ZpGDBD in attP2	20150925_43_H2	nerna_is_screen_review	HAV5_X_0083	A01	Sat Oct 10 11:23:52 EDT 2015	112506	Fly Light	Sample#2192742843083128930	f		screen	Rubin	Aljoscha Nern	JRC_IS21035-20150925_43_H2	Drosophila melanogaster	20x
IS21037	this paper	w; 89G07-p65ADZ; MKRS/TM6B_VT059224-ZpGdbd in attP2	20150925_42_C4	nerna_is_screen_review	HAV5_X_0083	A01	Mon Oct 12 16:49:42 EDT 2015	112508	Fly Light	Sample#2193549613883981922	f		screen	Rubin	Aljoscha Nern	JRC_IS21037-20150925_42_C4	Drosophila melanogaster	20x
IS21038	this paper	w; 89G07-p65ADZ; MKRS/TM6B_VT059225-ZpGdbd in attP2	20191004_44_G4	minegishir_is_screen_review	UAS_Chrimson_Venus_X_0070	A01	Thu Oct 24 18:04:18 EDT 2019	200726	Fly Light	Sample#2727365716368949346	f		screen	Dickson	Ryo Minegishi	JRC_IS21038-20191004_44_G4	Drosophila melanogaster	20x
IS21038	this paper	w; 89G07-p65ADZ; MKRS/TM6B_VT059225-ZpGdbd in attP2	20150925_43_C5	nerna_is_screen_review	HAV5_X_0083	A01	Sat Oct 10 11:23:48 EDT 2015	112509	Fly Light	Sample#2192742824372338786	f		screen	Rubin	Aljoscha Nern	JRC_IS21038-20150925_43_C5	Drosophila melanogaster	20x
IS21038	this paper	w; 89G07-p65ADZ; MKRS/TM6B_VT059225-ZpGdbd in attP2	20210326_45_E4	nerna_is_screen_review	UAS_Chrimson_Venus_X_0070	A01	Thu Apr 15 14:49:43 EDT 2021	224275	Fly Light	Sample#2922643806706729058	f		screen	Rubin	Aljoscha Nern	JRC_IS21038-20210326_45_E4	Drosophila melanogaster	20x
IS21039	this paper	w; 89G07-p65ADZ; MKRS/TM6B_VT050247-ZpGDBD in attP2	20150925_43_C2	nerna_is_screen_review	HAV5_X_0083	A01	Sat Oct 10 11:23:48 EDT 2015	112510	Fly Light	Sample#2192742823378288738	f		screen	Rubin	Aljoscha Nern	JRC_IS21039-20150925_43_C2	Drosophila melanogaster	20x
IS21040	this paper	w; 89G07-p65ADZ; MKRS/TM6B_37H04-ZpGdbd in attP2	20150925_43_H6	nerna_is_screen_review	HAV5_X_0083	A01	Sat Oct 10 11:23:53 EDT 2015	112511	Fly Light	Sample#2192742843682914402	f		screen	Rubin	Aljoscha Nern	JRC_IS21040-20150925_43_H6	Drosophila melanogaster	20x
IS21042	this paper	92A09-p65ADZp in attP40; MKRS/TM6B_VT010264-ZpGDBD in attP2	20150925_43_E4	nerna_is_screen_review	HAV5_X_0083	A01	Sat Oct 10 11:23:50 EDT 2015	112513	Fly Light	Sample#2192742833775968354	f		screen	Rubin	Aljoscha Nern	JRC_IS21042-20150925_43_E4	Drosophila melanogaster	20x
IS21043	this paper	92A09-p65ADZp in attP40; MKRS/TM6B_VT002033-ZpGdbd in attP2	20150925_43_G5	nerna_is_screen_review	HAV5_X_0083	A01	Sat Oct 10 11:23:52 EDT 2015	112514	Fly Light	Sample#2192742842462371938	f		screen	Rubin	Aljoscha Nern	JRC_IS21043-20150925_43_G5	Drosophila melanogaster	20x
IS21044	this paper	92A09-p65ADZp in attP40; MKRS/TM6B_41A08-ZpGdbd in attP2	20150925_42_E5	nerna_is_screen_review	HAV5_X_0083	A01	Mon Oct 12 16:49:42 EDT 2015	112515	Fly Light	Sample#2193549615633006690	f		screen	Rubin	Aljoscha Nern	JRC_IS21044-20150925_42_E5	Drosophila melanogaster	20x
IS21045	this paper	92A09-p65ADZp in attP40; MKRS/TM6B_89F06-ZpGdbd in attP2	20150925_43_A1	nerna_is_screen_review	HAV5_X_0083	A01	Sat Oct 10 11:23:47 EDT 2015	112516	Fly Light	Sample#2192742820635213922	f		screen	Rubin	Aljoscha Nern	JRC_IS21045-20150925_43_A1	Drosophila melanogaster	20x
IS21046	this paper	92A10-p65ADZp in attP40; MKRS/TM6B_VT042724-ZpGDBD in attP2	20150925_43_C4	nerna_is_screen_review	HAV5_X_0083	A01	Sat Oct 10 11:23:48 EDT 2015	112517	Fly Light	Sample#2192742824049377378	f		screen	Rubin	Aljoscha Nern	JRC_IS21046-20150925_43_C4	Drosophila melanogaster	20x
IS21047	this paper	92A10-p65ADZp in attP40; MKRS/TM6B_VT058716-ZpGdbd in attP2	20150925_43_D1	nerna_is_screen_review	HAV5_X_0083	A01	Sat Oct 10 11:23:48 EDT 2015	112518	Fly Light	Sample#2192742825026650210	f		screen	Rubin	Aljoscha Nern	JRC_IS21047-20150925_43_D1	Drosophila melanogaster	20x
IS21051	this paper	92D05-p65ADZp in attP40_VT063300-ZpGdbd in attP2	20150925_42_D6	nerna_is_screen_review	HAV5_X_0083	A01	Mon Oct 12 16:49:42 EDT 2015	112522	Fly Light	Sample#2193549615305850978	f		screen	Rubin	Aljoscha Nern	JRC_IS21051-20150925_42_D6	Drosophila melanogaster	20x
IS21053	this paper	92D05-p65ADZp in attP40_VT039488-ZpGdbd in attP2	20150925_42_D1	nerna_is_screen_review	HAV5_X_0083	A01	Mon Oct 12 16:49:42 EDT 2015	112524	Fly Light	Sample#2193549614571847778	f		screen	Rubin	Aljoscha Nern	JRC_IS21053-20150925_42_D1	Drosophila melanogaster	20x
IS21054	this paper	92D05-p65ADZp in attP40_13D05-ZpGdbd in attP2	20150925_43_H3	nerna_is_screen_review	HAV5_X_0083	A01	Sat Oct 10 11:23:53 EDT 2015	112525	Fly Light	Sample#2192742843385118818	f		screen	Rubin	Aljoscha Nern	JRC_IS21054-20150925_43_H3	Drosophila melanogaster	20x
IS21058	this paper	92E10-p65ADZp in VK00027_VT002014-ZpGdbd in attP2	20150925_42_B5	nerna_is_screen_review	HAV5_X_0083	A01	Mon Oct 12 16:49:41 EDT 2015	112529	Fly Light	Sample#2193549612852183138	f		screen	Rubin	Aljoscha Nern	JRC_IS21058-20150925_42_B5	Drosophila melanogaster	20x
IS21060	this paper	92E10-p65ADZp in VK00027_VT059225-ZpGdbd in attP2	20150925_42_C3	nerna_is_screen_review	HAV5_X_0083	A01	Mon Oct 12 16:49:42 EDT 2015	112531	Fly Light	Sample#2193549613548437602	f		screen	Rubin	Aljoscha Nern	JRC_IS21060-20150925_42_C3	Drosophila melanogaster	20x
IS21062	this paper	58H05-p65ADZp in attP40_VT018130-ZpGDBD in attP2	20150911_51_G1	goldammerj_is_screen_review	UAS_Chrimson_Venus_X_0070	A02	Fri Sep 25 14:51:38 EDT 2015	112533	Fly Light	Sample#2187359307224318050	f		screen	Terra Incognita	Jens Goldammer	JRC_IS21062-20150911_51_G1	Drosophila melanogaster	20x
IS21063	this paper	47E07-p65ADZp in attP40; MKRS/TM6B_VT020732-ZpGdbd in attP2	20150911_51_G2	goldammerj_is_screen_review	UAS_Chrimson_Venus_X_0070	A02	Fri Sep 25 14:51:38 EDT 2015	112534	Fly Light	Sample#2187359307488559202	f		screen	Terra Incognita	Jens Goldammer	JRC_IS21063-20150911_51_G2	Drosophila melanogaster	20x
IS21064	this paper	47E07-p65ADZp in attP40; MKRS/TM6B_VT030279-ZpGdbd in attP2	20150911_51_G3	goldammerj_is_screen_review	UAS_Chrimson_Venus_X_0070	A02	Fri Sep 25 14:51:38 EDT 2015	112535	Fly Light	Sample#2187359307752800354	f		screen	Terra Incognita	Jens Goldammer	JRC_IS21064-20150911_51_G3	Drosophila melanogaster	20x
IS21068	this paper	VT036271-p65ADZp in attP40_VT047316-ZpGdbd in attP2	20150911_51_H4	goldammerj_is_screen_review	UAS_Chrimson_Venus_X_0070	A02	Fri Sep 25 14:51:38 EDT 2015	112539	Fly Light	Sample#2187359308788793442	f		screen	Terra Incognita	Jens Goldammer	JRC_IS21068-20150911_51_H4	Drosophila melanogaster	20x
IS21083	this paper	47E07-p65ADZp in attP40; MKRS/TM6B_VT025782-ZpGDBD in attP2	20150925_52_E1	goldammerj_is_screen_review	UAS_Chrimson_Venus_X_0070	A03	Mon Oct 12 12:03:41 EDT 2015	112617	Fly Light	Sample#2193477637622464610	f		screen	Terra Incognita	Jens Goldammer	JRC_IS21083-20150925_52_E1	Drosophila melanogaster	20x
IS21084	this paper	VT030303-p65ADZp in attP40_VT014718-ZpGDBD in attP2	20150925_52_E2	goldammerj_is_screen_review	UAS_Chrimson_Venus_X_0070	A03	Mon Oct 12 12:03:41 EDT 2015	112618	Fly Light	Sample#2193477638197084258	f		screen	Terra Incognita	Jens Goldammer	JRC_IS21084-20150925_52_E2	Drosophila melanogaster	20x
IS21085	this paper	VT030279-p65ADZp in attP40_26C12-ZpGdbd in attP2	20150925_52_A2	goldammerj_is_screen_review	UAS_Chrimson_Venus_X_0070	A03	Mon Oct 12 12:03:24 EDT 2015	112619	Fly Light	Sample#2193477564045983842	f		screen	Terra Incognita	Jens Goldammer	JRC_IS21085-20150925_52_A2	Drosophila melanogaster	20x
IS21086	this paper	VT030279-p65ADZp in attP40_VT014718-ZpGDBD in attP2	20150925_52_A3	goldammerj_is_screen_review	UAS_Chrimson_Venus_X_0070	A03	Mon Oct 12 12:03:24 EDT 2015	112620	Fly Light	Sample#2193477564406693986	f		screen	Terra Incognita	Jens Goldammer	JRC_IS21086-20150925_52_A3	Drosophila melanogaster	20x
IS21087	this paper	VT036271-p65ADZp in attP40_VT018446-ZpGDBD in attP2	20150925_52_A4	goldammerj_is_screen_review	UAS_Chrimson_Venus_X_0070	A03	Mon Oct 12 12:03:25 EDT 2015	112621	Fly Light	Sample#2193477569771208802	f		screen	Terra Incognita	Jens Goldammer	JRC_IS21087-20150925_52_A4	Drosophila melanogaster	20x
IS21088	this paper	VT036271-p65ADZp in attP40_VT030303-ZpGDBD in attP2	20150925_52_F1	goldammerj_is_screen_review	UAS_Chrimson_Venus_X_0070	A03	Mon Oct 12 12:03:42 EDT 2015	112622	Fly Light	Sample#2193477639258243170	f		screen	Terra Incognita	Jens Goldammer	JRC_IS21088-20150925_52_F1	Drosophila melanogaster	20x
IS21089	this paper	VT036271-p65ADZp in attP40_26C12-ZpGdbd in attP2	20150925_52_F2	goldammerj_is_screen_review	UAS_Chrimson_Venus_X_0070	A03	Mon Oct 12 12:03:42 EDT 2015	112623	Fly Light	Sample#2193477639522484322	f		screen	Terra Incognita	Jens Goldammer	JRC_IS21089-20150925_52_F2	Drosophila melanogaster	20x
IS21091	this paper	VT016279-p65ADZp in attP40_VT058566-ZpGdbd in attP2	20151002_42_E3	nerna_is_screen_review	UAS_Chrimson_Venus_X_0070	A01	Wed Oct 21 14:02:27 EDT 2015	112669	Fly Light	Sample#2196769014691135586	f		screen	Rubin	Aljoscha Nern	JRC_IS21091-20151002_42_E3	Drosophila melanogaster	20x
IS21094	this paper	VT021537-p65ADZp in attP40_VT059775-ZpGdbd in attP2	20151002_42_B4	nerna_is_screen_review	UAS_Chrimson_Venus_X_0070	A01	Wed Oct 21 14:02:26 EDT 2015	112672	Fly Light	Sample#2196769013168603234	f		screen	Rubin	Aljoscha Nern	JRC_IS21094-20151002_42_B4	Drosophila melanogaster	20x
IS21098	this paper	VT034262-p65ADZ in attP40_VT049240-ZpGdbd in attP2	20151002_41_A1	nerna_is_screen_review	UAS_Chrimson_Venus_X_0070	A01	Mon Oct 19 13:25:52 EDT 2015	112676	Fly Light	Sample#2196035035654520930	f		screen	Rubin	Aljoscha Nern	JRC_IS21098-20151002_41_A1	Drosophila melanogaster	20x
IS21100	this paper	VT059775-p65ADZp in attP40_VT021537-ZpGdbd in attP2	20151002_42_A1	nerna_is_screen_review	UAS_Chrimson_Venus_X_0070	A01	Wed Oct 21 14:02:26 EDT 2015	112678	Fly Light	Sample#2196769010803015778	f		screen	Rubin	Aljoscha Nern	JRC_IS21100-20151002_42_A1	Drosophila melanogaster	20x
IS21105	this paper	VT020818-p65ADZp in attP40_VT014093-ZpGdbd in attP2	20151002_41_C3	nerna_is_screen_review	UAS_Chrimson_Venus_X_0070	A01	Mon Oct 19 13:26:08 EDT 2015	112683	Fly Light	Sample#2196035099856732258	f		screen	Rubin	Aljoscha Nern	JRC_IS21105-20151002_41_C3	Drosophila melanogaster	20x
IS21109	this paper	VT002051-p65ADZp in attP40_21E02-ZpGdbd in attP2	20151002_42_F4	nerna_is_screen_review	UAS_Chrimson_Venus_X_0070	A01	Wed Oct 21 14:02:27 EDT 2015	112687	Fly Light	Sample#2196769015454498914	f		screen	Rubin	Aljoscha Nern	JRC_IS21109-20151002_42_F4	Drosophila melanogaster	20x
IS21111	this paper	VT002051-p65ADZp in attP40_42G10-ZpGdbd in attP2	20151002_42_G2	nerna_is_screen_review	UAS_Chrimson_Venus_X_0070	A01	Wed Oct 21 14:02:27 EDT 2015	112689	Fly Light	Sample#2196769016188502114	f		screen	Rubin	Aljoscha Nern	JRC_IS21111-20151002_42_G2	Drosophila melanogaster	20x
IS21112	this paper	VT002051-p65ADZp in attP40_48H04-ZpGdbd in attP2	20151002_42_H4	nerna_is_screen_review	UAS_Chrimson_Venus_X_0070	A01	Wed Oct 21 14:02:27 EDT 2015	112690	Fly Light	Sample#2196769017744588898	f		screen	Rubin	Aljoscha Nern	JRC_IS21112-20151002_42_H4	Drosophila melanogaster	20x
IS21113	this paper	VT002051-p65ADZp in attP40_60H09-ZpGdbd in attP2	20151002_42_J3	nerna_is_screen_review	UAS_Chrimson_Venus_X_0070	A01	Wed Oct 21 14:02:28 EDT 2015	112691	Fly Light	Sample#2196769019598471266	f		screen	Rubin	Aljoscha Nern	JRC_IS21113-20151002_42_J3	Drosophila melanogaster	20x
IS21120	this paper	VT049240-p65ADZp in attP40_VT034262-ZpGdbd in attP2	20151002_42_B6	nerna_is_screen_review	UAS_Chrimson_Venus_X_0070	A01	Wed Oct 21 14:02:26 EDT 2015	112698	Fly Light	Sample#2196769013638365282	f		screen	Rubin	Aljoscha Nern	JRC_IS21120-20151002_42_B6	Drosophila melanogaster	20x
IS21124	this paper	VT010063-p65ADZp in JK22C_VT014093-ZpGdbd in attP2	20151002_42_H3	nerna_is_screen_review	UAS_Chrimson_Venus_X_0070	A01	Wed Oct 21 14:02:27 EDT 2015	112702	Fly Light	Sample#2196769017333547106	f		screen	Rubin	Aljoscha Nern	JRC_IS21124-20151002_42_H3	Drosophila melanogaster	20x
IS21125	this paper	VT015970-p65ADZp in attP40_VT014093-ZpGdbd in attP2	20151002_41_B4	nerna_is_screen_review	UAS_Chrimson_Venus_X_0070	A01	Mon Oct 19 13:25:56 EDT 2015	112703	Fly Light	Sample#2196035051223777378	f		screen	Rubin	Aljoscha Nern	JRC_IS21125-20151002_41_B4	Drosophila melanogaster	20x
IS21128	this paper	VT026046-p65ADZp in attP40_VT020818-ZpGDBD in attP2	20151002_42_A5	nerna_is_screen_review	UAS_Chrimson_Venus_X_0070	A01	Wed Oct 21 14:02:26 EDT 2015	112706	Fly Light	Sample#2196769011969032290	f		screen	Rubin	Aljoscha Nern	JRC_IS21128-20151002_42_A5	Drosophila melanogaster	20x
IS21129	this paper	VT026046-p65ADZp in attP40_VT014093-ZpGdbd in attP2	20151002_41_C2	nerna_is_screen_review	UAS_Chrimson_Venus_X_0070	A01	Mon Oct 19 13:25:59 EDT 2015	112707	Fly Light	Sample#2196035062061858914	f		screen	Rubin	Aljoscha Nern	JRC_IS21129-20151002_41_C2	Drosophila melanogaster	20x
IS21130	this paper	VT045239-p65ADZp in attP40_VT019345-ZpGdbd in attP2	20151002_42_A4	nerna_is_screen_review	UAS_Chrimson_Venus_X_0070	A01	Wed Oct 21 14:02:26 EDT 2015	112708	Fly Light	Sample#2196769011562184802	f		screen	Rubin	Aljoscha Nern	JRC_IS21130-20151002_42_A4	Drosophila melanogaster	20x
IS21132	this paper	VT008657-p65ADZp in attP40_10F08-ZpGdbd in attP2	20151002_41_H2	nerna_is_screen_review	UAS_Chrimson_Venus_X_0070	A01	Mon Oct 19 13:26:25 EDT 2015	112710	Fly Light	Sample#2196035173181554786	f		screen	Rubin	Aljoscha Nern	JRC_IS21132-20151002_41_H2	Drosophila melanogaster	20x
IS21133	this paper	VT008657-p65ADZp in attP40_22E12-ZpGdbd in attP2	20151002_41_E6	nerna_is_screen_review	UAS_Chrimson_Venus_X_0070	A01	Mon Oct 19 13:26:15 EDT 2015	112711	Fly Light	Sample#2196035130798112866	f		screen	Rubin	Aljoscha Nern	JRC_IS21133-20151002_41_E6	Drosophila melanogaster	20x
IS21134	this paper	VT008657-p65ADZp in attP40_52H09-ZpGdbd in attP2	20151002_42_I6	nerna_is_screen_review	UAS_Chrimson_Venus_X_0070	A01	Wed Oct 21 14:02:28 EDT 2015	112712	Fly Light	Sample#2196769018780581986	f		screen	Rubin	Aljoscha Nern	JRC_IS21134-20151002_42_I6	Drosophila melanogaster	20x
IS21136	this paper	VT014093-p65ADZp in attP40_VT020818-ZpGDBD in attP2	20151002_42_A6	nerna_is_screen_review	UAS_Chrimson_Venus_X_0070	A01	Wed Oct 21 14:02:26 EDT 2015	112714	Fly Light	Sample#2196769012359102562	f		screen	Rubin	Aljoscha Nern	JRC_IS21136-20151002_42_A6	Drosophila melanogaster	20x
IS21138	this paper	VT014093-p65ADZp in attP40_VT008186-ZpGdbd in attP2	20151002_41_D6	nerna_is_screen_review	UAS_Chrimson_Venus_X_0070	A01	Mon Oct 19 13:26:08 EDT 2015	112716	Fly Light	Sample#2196035100964028514	f		screen	Rubin	Aljoscha Nern	JRC_IS21138-20151002_41_D6	Drosophila melanogaster	20x
IS21139	this paper	VT014093-p65ADZp in attP40_53B06-ZpGdbd in attP2	20151002_42_I5	nerna_is_screen_review	UAS_Chrimson_Venus_X_0070	A01	Wed Oct 21 14:02:27 EDT 2015	112717	Fly Light	Sample#2196769018432454754	f		screen	Rubin	Aljoscha Nern	JRC_IS21139-20151002_42_I5	Drosophila melanogaster	20x
IS21144	this paper	VT033463-p65ADZ in attP40_VT009837-ZpGDBD in attP2	20151002_41_E1	nerna_is_screen_review	UAS_Chrimson_Venus_X_0070	A01	Mon Oct 19 13:26:08 EDT 2015	112722	Fly Light	Sample#2196035101324738658	f		screen	Rubin	Aljoscha Nern	JRC_IS21144-20151002_41_E1	Drosophila melanogaster	20x
IS21145	this paper	VT033463-p65ADZ in attP40_VT058566-ZpGdbd in attP2	20151002_41_H1	nerna_is_screen_review	UAS_Chrimson_Venus_X_0070	A01	Mon Oct 19 13:26:25 EDT 2015	112723	Fly Light	Sample#2196035172774707298	f		screen	Rubin	Aljoscha Nern	JRC_IS21145-20151002_41_H1	Drosophila melanogaster	20x
IS21147	this paper	VT013605-p65ADZp in attP40_VT010063-ZpGDBD in attP2	20151002_41_A3	nerna_is_screen_review	UAS_Chrimson_Venus_X_0070	A01	Mon Oct 19 13:25:55 EDT 2015	112725	Fly Light	Sample#2196035045553078370	f		screen	Rubin	Aljoscha Nern	JRC_IS21147-20151002_41_A3	Drosophila melanogaster	20x
IS21152	this paper	VT008186-p65ADZp in attP40_VT014093-ZpGdbd in attP2	20151002_41_C6	nerna_is_screen_review	UAS_Chrimson_Venus_X_0070	A01	Mon Oct 19 13:26:08 EDT 2015	112730	Fly Light	Sample#2196035100288745570	f		screen	Rubin	Aljoscha Nern	JRC_IS21152-20151002_41_C6	Drosophila melanogaster	20x
IS21160	this paper	w; 10F08-p65ADZp; MKRS/ TM6B_21E02-ZpGdbd in attP2	20151002_42_G6	nerna_is_screen_review	UAS_Chrimson_Venus_X_0070	A01	Wed Oct 21 14:02:27 EDT 2015	112738	Fly Light	Sample#2196769016930893922	f		screen	Rubin	Aljoscha Nern	JRC_IS21160-20151002_42_G6	Drosophila melanogaster	20x
IS21162	this paper	w; 10F08-p65ADZp; MKRS/ TM6B_52H09-ZpGdbd in attP2	20151002_42_I2	nerna_is_screen_review	UAS_Chrimson_Venus_X_0070	A01	Wed Oct 21 14:02:27 EDT 2015	112740	Fly Light	Sample#2196769018092716130	f		screen	Rubin	Aljoscha Nern	JRC_IS21162-20151002_42_I2	Drosophila melanogaster	20x
IS21165	this paper	19C05-p65ADZp in attP40_VT020818-ZpGDBD in attP2	20151002_42_B1	nerna_is_screen_review	UAS_Chrimson_Venus_X_0070	A01	Wed Oct 21 14:02:26 EDT 2015	112743	Fly Light	Sample#2196769012724007010	f		screen	Rubin	Aljoscha Nern	JRC_IS21165-20151002_42_B1	Drosophila melanogaster	20x
IS21166	this paper	19C05-p65ADZp in attP40_VT014093-ZpGdbd in attP2	20151002_41_B6	nerna_is_screen_review	UAS_Chrimson_Venus_X_0070	A01	Mon Oct 19 13:25:58 EDT 2015	112744	Fly Light	Sample#2196035061369798754	f		screen	Rubin	Aljoscha Nern	JRC_IS21166-20151002_41_B6	Drosophila melanogaster	20x
IS21167	this paper	21A05-p65ADZp in attP40; MKRS/TM6B_VT010063-ZpGDBD in attP2	20151002_41_A4	nerna_is_screen_review	UAS_Chrimson_Venus_X_0070	A01	Mon Oct 19 13:25:55 EDT 2015	112745	Fly Light	Sample#2196035045993480290	f		screen	Rubin	Aljoscha Nern	JRC_IS21167-20151002_41_A4	Drosophila melanogaster	20x
IS21168	this paper	21A05-p65ADZp in attP40; MKRS/TM6B_VT008186-ZpGdbd in attP2	20151002_42_D4	nerna_is_screen_review	UAS_Chrimson_Venus_X_0070	A01	Wed Oct 21 14:02:26 EDT 2015	112746	Fly Light	Sample#2196769013999075426	f		screen	Rubin	Aljoscha Nern	JRC_IS21168-20151002_42_D4	Drosophila melanogaster	20x
IS21170	this paper	22A02-p65ADZp in attP40_VT014093-ZpGdbd in attP2	20151002_41_B5	nerna_is_screen_review	UAS_Chrimson_Venus_X_0070	A01	Mon Oct 19 13:25:58 EDT 2015	112748	Fly Light	Sample#2196035061004894306	f		screen	Rubin	Aljoscha Nern	JRC_IS21170-20151002_41_B5	Drosophila melanogaster	20x
IS21175	this paper	42G10-p65ADZp in attP40_VT019345-ZpGdbd in attP2	20151002_42_A2	nerna_is_screen_review	UAS_Chrimson_Venus_X_0070	A01	Wed Oct 21 14:02:26 EDT 2015	112753	Fly Light	Sample#2196769011155337314	f		screen	Rubin	Aljoscha Nern	JRC_IS21175-20151002_42_A2	Drosophila melanogaster	20x
IS21176	this paper	47F07-p65ADZp in attP40; MKRS/TM6B_VT043859-ZpGDBD in attP2	20151002_41_F6	nerna_is_screen_review	UAS_Chrimson_Venus_X_0070	A01	Mon Oct 19 13:26:15 EDT 2015	112754	Fly Light	Sample#2196035131251097698	f		screen	Rubin	Aljoscha Nern	JRC_IS21176-20151002_41_F6	Drosophila melanogaster	20x
IS21178	this paper	55E10-p65ADZp in attP40_VT043859-ZpGDBD in attP2	20151002_41_G1	nerna_is_screen_review	UAS_Chrimson_Venus_X_0070	A01	Mon Oct 19 13:26:18 EDT 2015	112756	Fly Light	Sample#2196035141124489314	f		screen	Rubin	Aljoscha Nern	JRC_IS21178-20151002_41_G1	Drosophila melanogaster	20x
IS21182	this paper	60H09-p65ADZp in attP40_48H04-ZpGdbd in attP2	20151002_42_G4	nerna_is_screen_review	UAS_Chrimson_Venus_X_0070	A01	Wed Oct 21 14:02:27 EDT 2015	112760	Fly Light	Sample#2196769016578572386	f		screen	Rubin	Aljoscha Nern	JRC_IS21182-20151002_42_G4	Drosophila melanogaster	20x
IS21186	this paper	61H01-p65ADZp in attP40_VT025493-ZpGdbd in attP2	20151002_41_E2	nerna_is_screen_review	UAS_Chrimson_Venus_X_0070	A01	Mon Oct 19 13:26:08 EDT 2015	112764	Fly Light	Sample#2196035101907746914	f		screen	Rubin	Aljoscha Nern	JRC_IS21186-20151002_41_E2	Drosophila melanogaster	20x
IS21201	this paper	VT038225-p65ADZp in attP40_VT017248-ZpGDBD in attP2	20151211_42_G6	nerna_is_screen_review	HAV5_X_0083	A01	Wed Jan 06 10:19:55 EST 2016	117702	Fly Light	Sample#2224631979670765642	f		screen	Rubin	Aljoscha Nern	JRC_IS21201-20151211_42_G6	Drosophila melanogaster	20x
IS21225	this paper	w; 35D03-p65ADZp; MKRS/TM6B_VT030303-ZpGDBD in attP2	20150925_52_E3	goldammerj_is_screen_review	UAS_Chrimson_Venus_X_0070	A03	Mon Oct 12 12:03:41 EDT 2015	112920	Fly Light	Sample#2193477638532628578	f		screen	Terra Incognita	Jens Goldammer	JRC_IS21225-20150925_52_E3	Drosophila melanogaster	20x
IS21225	this paper	w; 35D03-p65ADZp; MKRS/TM6B_VT030303-ZpGDBD in attP2	20160318_52_J4	goldammerj_is_screen_review	UAS_Chrimson_Venus_X_0070	A00	Sat Apr 02 10:36:07 EDT 2016	123730	Fly Light	Sample#2256148701162504290	f		screen	Terra Incognita	Jens Goldammer	JRC_IS21225-20160318_52_J4	Drosophila melanogaster	20x
IS21226	this paper	VT032282-p65ADZp in attP40_26C12-ZpGdbd in attP2	20150925_52_E4	goldammerj_is_screen_review	UAS_Chrimson_Venus_X_0070	A03	Mon Oct 12 12:03:41 EDT 2015	112921	Fly Light	Sample#2193477638922698850	f		screen	Terra Incognita	Jens Goldammer	JRC_IS21226-20150925_52_E4	Drosophila melanogaster	20x
IS21227	this paper	VT032282-p65ADZp in attP40_VT014718-ZpGDBD in attP2	20150925_52_D1	goldammerj_is_screen_review	UAS_Chrimson_Venus_X_0070	A03	Mon Oct 12 12:03:39 EDT 2015	112922	Fly Light	Sample#2193477630508925026	f		screen	Terra Incognita	Jens Goldammer	JRC_IS21227-20150925_52_D1	Drosophila melanogaster	20x
IS21228	this paper	VT032282-p65ADZp in attP40_VT047316-ZpGdbd in attP2	20150925_52_D2	goldammerj_is_screen_review	UAS_Chrimson_Venus_X_0070	A03	Mon Oct 12 12:03:40 EDT 2015	112923	Fly Light	Sample#2193477630798332002	f		screen	Terra Incognita	Jens Goldammer	JRC_IS21228-20150925_52_D2	Drosophila melanogaster	20x
IS21229	this paper	VT036271-p65ADZp in attP40_72D01-ZpGdbd in attP2	20150925_52_F3	goldammerj_is_screen_review	UAS_Chrimson_Venus_X_0070	A03	Mon Oct 12 12:03:42 EDT 2015	112924	Fly Light	Sample#2193477639828668514	f		screen	Terra Incognita	Jens Goldammer	JRC_IS21229-20150925_52_F3	Drosophila melanogaster	20x
IS21230	this paper	VT036271-p65ADZp in attP40_VT044966-ZpGDBD in attP2	20150925_52_F4	goldammerj_is_screen_review	UAS_Chrimson_Venus_X_0070	A03	Mon Oct 12 12:03:43 EDT 2015	112925	Fly Light	Sample#2193477644438208610	f		screen	Terra Incognita	Jens Goldammer	JRC_IS21230-20150925_52_F4	Drosophila melanogaster	20x
IS21231	this paper	VT030303-p65ADZp in attP40_26C12-ZpGdbd in attP2	20150925_52_D3	goldammerj_is_screen_review	UAS_Chrimson_Venus_X_0070	A03	Mon Oct 12 12:03:40 EDT 2015	112926	Fly Light	Sample#2193477631213568098	f		screen	Terra Incognita	Jens Goldammer	JRC_IS21231-20150925_52_D3	Drosophila melanogaster	20x
IS21232	this paper	VT030303-p65ADZp in attP40_VT047316-ZpGdbd in attP2	20150925_52_D4	goldammerj_is_screen_review	UAS_Chrimson_Venus_X_0070	A03	Mon Oct 12 12:03:40 EDT 2015	112927	Fly Light	Sample#2193477632148897890	f		screen	Terra Incognita	Jens Goldammer	JRC_IS21232-20150925_52_D4	Drosophila melanogaster	20x
IS21233	this paper	VT030303-p65ADZp in attP40_VT018446-ZpGDBD in attP2	20150925_52_C1	goldammerj_is_screen_review	UAS_Chrimson_Venus_X_0070	A03	Mon Oct 12 12:03:27 EDT 2015	112928	Fly Light	Sample#2193477577698443362	f		screen	Terra Incognita	Jens Goldammer	JRC_IS21233-20150925_52_C1	Drosophila melanogaster	20x
IS21234	this paper	VT030279-p65ADZp in attP40_72D01-ZpGdbd in attP2	20150925_52_C2	goldammerj_is_screen_review	UAS_Chrimson_Venus_X_0070	A03	Mon Oct 12 12:03:28 EDT 2015	112929	Fly Light	Sample#2193477582769356898	f		screen	Terra Incognita	Jens Goldammer	JRC_IS21234-20150925_52_C2	Drosophila melanogaster	20x
IS21235	this paper	37H01-p65ADZp in attP40_37G02-ZpGdbd in attP2	20150925_52_C3	goldammerj_is_screen_review	UAS_Chrimson_Venus_X_0070	A03	Mon Oct 12 12:03:35 EDT 2015	112930	Fly Light	Sample#2193477611500339298	f		screen	Terra Incognita	Jens Goldammer	JRC_IS21235-20150925_52_C3	Drosophila melanogaster	20x
IS21236	this paper	37H01-p65ADZp in attP40_21C05-ZpGdbd in attP2	20150925_52_C4	goldammerj_is_screen_review	UAS_Chrimson_Venus_X_0070	A03	Mon Oct 12 12:03:39 EDT 2015	112931	Fly Light	Sample#2193477629871394914	f		screen	Terra Incognita	Jens Goldammer	JRC_IS21236-20150925_52_C4	Drosophila melanogaster	20x
IS21237	this paper	41H07-p65ADZp in attP40_21C05-ZpGdbd in attP2	20150925_52_B1	goldammerj_is_screen_review	UAS_Chrimson_Venus_X_0070	A03	Mon Oct 12 12:03:26 EDT 2015	112932	Fly Light	Sample#2193477574858899554	f		screen	Terra Incognita	Jens Goldammer	JRC_IS21237-20150925_52_B1	Drosophila melanogaster	20x
IS21238	this paper	41H07-p65ADZp in attP40_34H12-ZpGdbd in attP2	20150925_52_B2	goldammerj_is_screen_review	UAS_Chrimson_Venus_X_0070	A03	Mon Oct 12 12:03:26 EDT 2015	112933	Fly Light	Sample#2193477575743897698	f		screen	Terra Incognita	Jens Goldammer	JRC_IS21238-20150925_52_B2	Drosophila melanogaster	20x
IS21239	this paper	41H07-p65ADZp in attP40_37G02-ZpGdbd in attP2	20150925_52_B3	goldammerj_is_screen_review	UAS_Chrimson_Venus_X_0070	A03	Mon Oct 12 12:03:27 EDT 2015	112934	Fly Light	Sample#2193477576884748386	f		screen	Terra Incognita	Jens Goldammer	JRC_IS21239-20150925_52_B3	Drosophila melanogaster	20x
IS21240	this paper	41H07-p65ADZp in attP40_85A07-ZpGDBD in attP2	20150925_52_B4	goldammerj_is_screen_review	UAS_Chrimson_Venus_X_0070	A03	Mon Oct 12 12:03:27 EDT 2015	112935	Fly Light	Sample#2193477577165766754	f		screen	Terra Incognita	Jens Goldammer	JRC_IS21240-20150925_52_B4	Drosophila melanogaster	20x
IS21241	this paper	85A07-p65ADZp in attP40_21C05-ZpGdbd in attP2	20150925_52_A1	goldammerj_is_screen_review	UAS_Chrimson_Venus_X_0070	A03	Mon Oct 12 12:03:24 EDT 2015	112936	Fly Light	Sample#2193477563735634018	f		screen	Terra Incognita	Jens Goldammer	JRC_IS21241-20150925_52_A1	Drosophila melanogaster	20x
IS21245	this paper	VT022019-p65ADZp in attP40_VT049899-ZpGDBD in attP2	20151009_42_C3	nerna_is_screen_review	HAV5_X_0083	A01	Tue Oct 27 02:49:28 EDT 2015	113042	Fly Light	Sample#2198773982268751946	f		screen	Rubin	Aljoscha Nern	JRC_IS21245-20151009_42_C3	Drosophila melanogaster	20x
IS21250	this paper	VT049899-p65ADZp in attP40_VT000605-ZpGdbd in attP2	20151009_42_F1	nerna_is_screen_review	HAV5_X_0083	A01	Tue Oct 27 02:49:29 EDT 2015	113047	Fly Light	Sample#2198773984940523594	f		screen	Rubin	Aljoscha Nern	JRC_IS21250-20151009_42_F1	Drosophila melanogaster	20x
IS21253	this paper	VT006545-p65ADZp in attP40_VT045607-ZpGdbd in attP2	20151009_42_A2	nerna_is_screen_review	HAV5_X_0083	A01	Sat Nov 28 20:23:06 EST 2015	113050	Fly Light	Sample#2210650647546560610	f		screen	Rubin	Aljoscha Nern	JRC_IS21253-20151009_42_A2	Drosophila melanogaster	20x
IS21256	this paper	VT009671-p65ADZp in attP40_92G12-ZpGdbd in attP2	20151009_42_B3	nerna_is_screen_review	HAV5_X_0083	A01	Tue Oct 27 02:49:28 EDT 2015	113053	Fly Light	Sample#2198773981434085450	f		screen	Rubin	Aljoscha Nern	JRC_IS21256-20151009_42_B3	Drosophila melanogaster	20x
IS21259	this paper	VT002033-p65ADZp in attP40_VT045607-ZpGdbd in attP2	20151009_42_B6	nerna_is_screen_review	HAV5_X_0083	A01	Tue Oct 27 02:49:28 EDT 2015	113056	Fly Light	Sample#2198773981857710154	f		screen	Rubin	Aljoscha Nern	JRC_IS21259-20151009_42_B6	Drosophila melanogaster	20x
IS21260	this paper	VT038873-p65ADZ in attP40_VT000267-ZpGdbd in attP2	20151009_42_G5	nerna_is_screen_review	HAV5_X_0083	A01	Tue Oct 27 02:49:30 EDT 2015	113057	Fly Light	Sample#2198773991055818826	f		screen	Rubin	Aljoscha Nern	JRC_IS21260-20151009_42_G5	Drosophila melanogaster	20x
IS21266	this paper	VT014093-p65ADZp in attP40_48H02-ZpGDBD in attP2	20151009_42_A3	nerna_is_screen_review	HAV5_X_0083	A01	Tue Oct 27 02:49:28 EDT 2015	113063	Fly Light	Sample#2198773980557475914	f		screen	Rubin	Aljoscha Nern	JRC_IS21266-20151009_42_A3	Drosophila melanogaster	20x
IS21267	this paper	VT031392-p65ADZp in attP40_VT008179-ZpGdbd in attP2	20151009_42_F2	nerna_is_screen_review	HAV5_X_0083	A01	Tue Oct 27 02:49:29 EDT 2015	113064	Fly Light	Sample#2198773986123317322	f		screen	Rubin	Aljoscha Nern	JRC_IS21267-20151009_42_F2	Drosophila melanogaster	20x
IS21268	this paper	VT031392-p65ADZp in attP40_VT045607-ZpGdbd in attP2	20210430_42_F3	nerna_is_screen_review	UAS_Chrimson_Venus_X_0070	A01	Mon May 17 16:39:11 EDT 2021	226579	Fly Light	Sample#2934267764858159202	f		screen	Rubin	Aljoscha Nern	JRC_IS21268-20210430_42_F3	Drosophila melanogaster	20x
IS21275	this paper	VT025976-p65ADZp in attP40_VT025976-ZpGdbd in attP2	20151009_42_H2	nerna_is_screen_review	HAV5_X_0083	A01	Tue Oct 27 02:49:31 EDT 2015	113072	Fly Light	Sample#2198773992532213834	f		screen	Rubin	Aljoscha Nern	JRC_IS21275-20151009_42_H2	Drosophila melanogaster	20x
IS21280	this paper	VT058716-p65ADZp in attP40_VT008179-ZpGdbd in attP2	20151009_42_F3	nerna_is_screen_review	HAV5_X_0083	A01	Tue Oct 27 02:49:29 EDT 2015	113077	Fly Light	Sample#2198773986953789514	f		screen	Rubin	Aljoscha Nern	JRC_IS21280-20151009_42_F3	Drosophila melanogaster	20x
IS21282	this paper	VT058716-p65ADZp in attP40_VT045607-ZpGdbd in attP2	20151009_43_C2	nerna_is_screen_review	HAV5_X_0083	A01	Tue Oct 27 02:49:29 EDT 2015	113079	Fly Light	Sample#2198773986525970506	f		screen	Rubin	Aljoscha Nern	JRC_IS21282-20151009_43_C2	Drosophila melanogaster	20x
IS21286	this paper	16E11-p65ADZp in attP40_VT049484-ZpGDBD in attP2	20151009_42_D6	nerna_is_screen_review	HAV5_X_0083	A01	Tue Oct 27 02:49:28 EDT 2015	113083	Fly Light	Sample#2198773983719981130	f		screen	Rubin	Aljoscha Nern	JRC_IS21286-20151009_42_D6	Drosophila melanogaster	20x
IS21287	this paper	16E11-p65ADZp in attP40_VT009671-ZpGDBD in attP2	20151009_43_B6	nerna_is_screen_review	HAV5_X_0083	A01	Tue Oct 27 02:49:29 EDT 2015	113084	Fly Light	Sample#2198773985733247050	f		screen	Rubin	Aljoscha Nern	JRC_IS21287-20151009_43_B6	Drosophila melanogaster	20x
IS21289	this paper	21B12-p65ADZp in attP40_VT026477-ZpGdbd in attP2	20151009_43_C6	nerna_is_screen_review	HAV5_X_0083	A01	Tue Oct 27 02:49:29 EDT 2015	113086	Fly Light	Sample#2198773987352248394	f		screen	Rubin	Aljoscha Nern	JRC_IS21289-20151009_43_C6	Drosophila melanogaster	20x
IS21290	this paper	21B12-p65ADZp in attP40_22G07-ZpGdbd in attP2	20151009_43_E1	nerna_is_screen_review	HAV5_X_0083	A01	Tue Oct 27 02:49:30 EDT 2015	113087	Fly Light	Sample#2198773990632194122	f		screen	Rubin	Aljoscha Nern	JRC_IS21290-20151009_43_E1	Drosophila melanogaster	20x
IS21291	this paper	w; 21F05-p65ADZp; MKRS/TM6B_VT012790-ZpGdbd in attP2	20151009_42_J1	nerna_is_screen_review	HAV5_X_0083	A01	Tue Oct 27 02:49:31 EDT 2015	113088	Fly Light	Sample#2198773995870879818	f		screen	Rubin	Aljoscha Nern	JRC_IS21291-20151009_42_J1	Drosophila melanogaster	20x
IS21292	this paper	22A02-p65ADZp in attP40_VT050300-ZpGdbd in attP2	20151009_43_H6	nerna_is_screen_review	HAV5_X_0083	A01	Tue Oct 27 02:49:31 EDT 2015	113089	Fly Light	Sample#2198773996269338698	f		screen	Rubin	Aljoscha Nern	JRC_IS21292-20151009_43_H6	Drosophila melanogaster	20x
IS21293	this paper	22A02-p65ADZp in attP40_VT020037-ZpGDBD in attP2	20151009_43_H5	nerna_is_screen_review	HAV5_X_0083	A01	Tue Oct 27 02:49:31 EDT 2015	113090	Fly Light	Sample#2198773995413700682	f		screen	Rubin	Aljoscha Nern	JRC_IS21293-20151009_43_H5	Drosophila melanogaster	20x
IS21295	this paper	22D12-p65ADZp in attP40_22G07-ZpGdbd in attP2	20151009_43_E2	nerna_is_screen_review	HAV5_X_0083	A01	Tue Oct 27 02:49:30 EDT 2015	113092	Fly Light	Sample#2198773991462666314	f		screen	Rubin	Aljoscha Nern	JRC_IS21295-20151009_43_E2	Drosophila melanogaster	20x
IS21300	this paper	w; 27A02-p65ADZp; MKRS/ TM6B_VT014093-ZpGdbd in attP2	20151009_42_F6	nerna_is_screen_review	HAV5_X_0083	A01	Tue Oct 27 02:49:30 EDT 2015	113097	Fly Light	Sample#2198773989411651658	f		screen	Rubin	Aljoscha Nern	JRC_IS21300-20151009_42_F6	Drosophila melanogaster	20x
IS21302	this paper	w; 27A02-p65ADZp; MKRS/ TM6B_11D02-ZpGDBD in attP2/TM3 (weak/TM3)	20151009_43_D3	nerna_is_screen_review	HAV5_X_0083	A01	Tue Oct 27 02:49:30 EDT 2015	113099	Fly Light	Sample#2198773989013192778	f		screen	Rubin	Aljoscha Nern	JRC_IS21302-20151009_43_D3	Drosophila melanogaster	20x
IS21307	this paper	28F07-p65ADZp in attP40_VT042724-ZpGDBD in attP2	20151009_43_D6	nerna_is_screen_review	HAV5_X_0083	A01	Tue Oct 27 02:49:30 EDT 2015	113104	Fly Light	Sample#2198773989810110538	f		screen	Rubin	Aljoscha Nern	JRC_IS21307-20151009_43_D6	Drosophila melanogaster	20x
IS21309	this paper	30A02-p65ADZp in attP40_VT045607-ZpGdbd in attP2	20151009_42_E3	nerna_is_screen_review	HAV5_X_0083	A01	Tue Oct 27 02:49:29 EDT 2015	113106	Fly Light	Sample#2198773984118440010	f		screen	Rubin	Aljoscha Nern	JRC_IS21309-20151009_42_E3	Drosophila melanogaster	20x
IS21311	this paper	42B05-p65ADZp in attP40_VT038873-ZpGdbd in attP2	20151009_42_E4	nerna_is_screen_review	HAV5_X_0083	A01	Tue Oct 27 02:49:29 EDT 2015	113108	Fly Light	Sample#2198773984521093194	f		screen	Rubin	Aljoscha Nern	JRC_IS21311-20151009_42_E4	Drosophila melanogaster	20x
IS21314	this paper	46F09-p65ADZp_67D09-ZpGdbd in attP2	20151009_42_C5	nerna_is_screen_review	HAV5_X_0083	A01	Tue Oct 27 02:49:28 EDT 2015	113111	Fly Light	Sample#2198773982700765258	f		screen	Rubin	Aljoscha Nern	JRC_IS21314-20151009_42_C5	Drosophila melanogaster	20x
IS21315	this paper	48H02-p65ADZp in attP40_VT019053-ZpGdbd in attP2	20210212_44_B3	minegishir_is_screen_review	UAS_Chrimson_Venus_X_0070	A01	Tue Mar 02 15:48:10 EST 2021	221268	Fly Light	Sample#2906728547429122146	f		screen	Dickson	Ryo Minegishi	JRC_IS21315-20210212_44_B3	Drosophila melanogaster	20x
IS21317	this paper	48H02-p65ADZp in attP40_VT014093-ZpGdbd in attP2	20151009_43_G5	nerna_is_screen_review	HAV5_X_0083	A01	Tue Oct 27 02:49:31 EDT 2015	113114	Fly Light	Sample#2198773994591617098	f		screen	Rubin	Aljoscha Nern	JRC_IS21317-20151009_43_G5	Drosophila melanogaster	20x
IS21324	this paper	65H03-p65ADZp in attP40_60H09-ZpGdbd in attP2	20151009_42_A4	nerna_is_screen_review	HAV5_X_0083	A01	Tue Oct 27 02:49:28 EDT 2015	113121	Fly Light	Sample#2198773980976906314	f		screen	Rubin	Aljoscha Nern	JRC_IS21324-20151009_42_A4	Drosophila melanogaster	20x
IS21327	this paper	66A01-p65ADZp in attP40_VT002051-ZpGdbd in attP2	20151009_43_D2	nerna_is_screen_review	HAV5_X_0083	A01	Tue Oct 27 02:49:30 EDT 2015	113124	Fly Light	Sample#2198773988186914890	f		screen	Rubin	Aljoscha Nern	JRC_IS21327-20151009_43_D2	Drosophila melanogaster	20x
IS21328	this paper	66A01-p65ADZp in attP40_VT008657-ZpGDBD in attP2	20151009_42_F4	nerna_is_screen_review	HAV5_X_0083	A01	Tue Oct 27 02:49:29 EDT 2015	113125	Fly Light	Sample#2198773987763290186	f		screen	Rubin	Aljoscha Nern	JRC_IS21328-20151009_42_F4	Drosophila melanogaster	20x
IS21333	this paper	76E11-p65ADZp in JK22C_VT020818-ZpGDBD in attP2	20151009_42_H6	nerna_is_screen_review	HAV5_X_0083	A01	Tue Oct 27 02:49:31 EDT 2015	113130	Fly Light	Sample#2198773993362686026	f		screen	Rubin	Aljoscha Nern	JRC_IS21333-20151009_42_H6	Drosophila melanogaster	20x
IS21334	this paper	76E11-p65ADZp in JK22C_VT014093-ZpGdbd in attP2	20151009_42_I1	nerna_is_screen_review	HAV5_X_0083	A01	Tue Oct 27 02:49:31 EDT 2015	113131	Fly Light	Sample#2198773994176381002	f		screen	Rubin	Aljoscha Nern	JRC_IS21334-20151009_42_I1	Drosophila melanogaster	20x
IS21338	this paper	82E12-p65ADZp in attP40_VT020037-ZpGDBD in attP2	20151009_42_I2	nerna_is_screen_review	HAV5_X_0083	A01	Tue Oct 27 02:49:31 EDT 2015	113135	Fly Light	Sample#2198773995011047498	f		screen	Rubin	Aljoscha Nern	JRC_IS21338-20151009_42_I2	Drosophila melanogaster	20x
IS21340	this paper	89F06-p65ADZp in attP40_VT045607-ZpGdbd in attP2	20151009_42_F5	nerna_is_screen_review	HAV5_X_0083	A01	Tue Oct 27 02:49:30 EDT 2015	113137	Fly Light	Sample#2198773988593762378	f		screen	Rubin	Aljoscha Nern	JRC_IS21340-20151009_42_F5	Drosophila melanogaster	20x
IS21350	this paper	21C05-p65ADZp in attP40_85A07-ZpGDBD in attP2	20151002_52_A1	goldammerj_is_screen_review	UAS_Chrimson_Venus_X_0070	A00	Wed Oct 21 14:01:17 EDT 2015	113224	Fly Light	Sample#2196768720896917602	f		screen	Terra Incognita	Jens Goldammer	JRC_IS21350-20151002_52_A1	Drosophila melanogaster	20x
IS21351	this paper	21C05-p65ADZp in attP40_37G02-ZpGdbd in attP2	20151002_52_A6	goldammerj_is_screen_review	UAS_Chrimson_Venus_X_0070	A00	Wed Oct 21 14:01:17 EDT 2015	113225	Fly Light	Sample#2196768722289426530	f		screen	Terra Incognita	Jens Goldammer	JRC_IS21351-20151002_52_A6	Drosophila melanogaster	20x
IS21352	this paper	21D03-p65ADZp in attP40_VT064569-ZpGDBD in attP2	20151002_52_A3	goldammerj_is_screen_review	UAS_Chrimson_Venus_X_0070	A00	Wed Oct 21 14:01:17 EDT 2015	113226	Fly Light	Sample#2196768721236656226	f		screen	Terra Incognita	Jens Goldammer	JRC_IS21352-20151002_52_A3	Drosophila melanogaster	20x
IS21353	this paper	41H07-p65ADZp in attP40_92C03-ZpGdbd in attP2	20151002_52_A4	goldammerj_is_screen_review	UAS_Chrimson_Venus_X_0070	A00	Wed Oct 21 14:01:17 EDT 2015	113227	Fly Light	Sample#2196768721580589154	f		screen	Terra Incognita	Jens Goldammer	JRC_IS21353-20151002_52_A4	Drosophila melanogaster	20x
IS21354	this paper	41H07-p65ADZp in attP40_VT064569-ZpGDBD in attP2	20151002_52_A5	goldammerj_is_screen_review	UAS_Chrimson_Venus_X_0070	A00	Wed Oct 21 14:01:17 EDT 2015	113228	Fly Light	Sample#2196768721945493602	f		screen	Terra Incognita	Jens Goldammer	JRC_IS21354-20151002_52_A5	Drosophila melanogaster	20x
IS21355	this paper	85A07-p65ADZp in attP40_37G02-ZpGdbd in attP2	20151002_51_D1	goldammerj_is_screen_review	UAS_Chrimson_Venus_X_0070	A00	Wed Oct 21 14:01:16 EDT 2015	113229	Fly Light	Sample#2196768719202418786	f		screen	Terra Incognita	Jens Goldammer	JRC_IS21355-20151002_51_D1	Drosophila melanogaster	20x
IS21356	this paper	38H01-p65ADZp in attP40_10F08-ZpGdbd in attP2	20151002_51_D2	goldammerj_is_screen_review	UAS_Chrimson_Venus_X_0070	A00	Wed Oct 21 14:01:16 EDT 2015	113230	Fly Light	Sample#2196768719542157410	f		screen	Terra Incognita	Jens Goldammer	JRC_IS21356-20151002_51_D2	Drosophila melanogaster	20x
IS21357	this paper	38H01-p65ADZp in attP40_20D06-ZpGdbd in attP2	20151002_51_D3	goldammerj_is_screen_review	UAS_Chrimson_Venus_X_0070	A00	Wed Oct 21 14:01:16 EDT 2015	113231	Fly Light	Sample#2196768719873507426	f		screen	Terra Incognita	Jens Goldammer	JRC_IS21357-20151002_51_D3	Drosophila melanogaster	20x
IS21358	this paper	38H01-p65ADZp in attP40_HAV5; CyO/ Sco; 21D07-ZpGDBD in attP2	20151002_51_C1	goldammerj_is_screen_review	UAS_Chrimson_Venus_X_0070	A00	Wed Oct 21 14:01:16 EDT 2015	113232	Fly Light	Sample#2196768718137065570	f		screen	Terra Incognita	Jens Goldammer	JRC_IS21358-20151002_51_C1	Drosophila melanogaster	20x
IS21359	this paper	37H01-p65ADZp in attP40_85A07-ZpGDBD in attP2	20151002_51_C2	goldammerj_is_screen_review	UAS_Chrimson_Venus_X_0070	A00	Wed Oct 21 14:01:16 EDT 2015	113233	Fly Light	Sample#2196768718506164322	f		screen	Terra Incognita	Jens Goldammer	JRC_IS21359-20151002_51_C2	Drosophila melanogaster	20x
IS21360	this paper	37H01-p65ADZp in attP40_92C03-ZpGdbd in attP2	20151211_53_J2	goldammerj_is_screen_review	UAS_Chrimson_Venus_X_0070	A00	Tue Jan 12 00:38:01 EST 2016	118594	Fly Light	Sample#2226659866548633698	f		screen	Terra Incognita	Jens Goldammer	JRC_IS21360-20151211_53_J2	Drosophila melanogaster	20x
IS21361	this paper	37H01-p65ADZp in attP40_VT064569-ZpGDBD in attP2	20151002_51_D4	goldammerj_is_screen_review	UAS_Chrimson_Venus_X_0070	A00	Wed Oct 21 14:01:16 EDT 2015	113235	Fly Light	Sample#2196768720230023266	f		screen	Terra Incognita	Jens Goldammer	JRC_IS21361-20151002_51_D4	Drosophila melanogaster	20x
IS21362	this paper	VT030279-p65ADZp in attP40_VT047316-ZpGdbd in attP2	20151002_51_B1	goldammerj_is_screen_review	UAS_Chrimson_Venus_X_0070	A00	Wed Oct 21 14:01:15 EDT 2015	113236	Fly Light	Sample#2196768716425789538	f		screen	Terra Incognita	Jens Goldammer	JRC_IS21362-20151002_51_B1	Drosophila melanogaster	20x
IS21363	this paper	w; 13A08-p65ADZp; MKRS/TM6B_72C10-ZpGdbd in attP2	20151002_51_B2	goldammerj_is_screen_review	UAS_Chrimson_Venus_X_0070	A00	Wed Oct 21 14:01:16 EDT 2015	113237	Fly Light	Sample#2196768716778111074	f		screen	Terra Incognita	Jens Goldammer	JRC_IS21363-20151002_51_B2	Drosophila melanogaster	20x
IS21364	this paper	w; 16C03-p65ADZp; MKRS/ TM6B_20D06-ZpGdbd in attP2	20151002_51_B3	goldammerj_is_screen_review	UAS_Chrimson_Venus_X_0070	A00	Wed Oct 21 14:01:16 EDT 2015	113238	Fly Light	Sample#2196768717134626914	f		screen	Terra Incognita	Jens Goldammer	JRC_IS21364-20151002_51_B3	Drosophila melanogaster	20x
IS21367	this paper	w; 13A08-p65ADZp; MKRS/TM6B_44H01-ZpGdbd in attP2	20151002_51_A2	goldammerj_is_screen_review	UAS_Chrimson_Venus_X_0070	A00	Wed Oct 21 14:01:15 EDT 2015	113247	Fly Light	Sample#2196768715393990754	f		screen	Terra Incognita	Jens Goldammer	JRC_IS21367-20151002_51_A2	Drosophila melanogaster	20x
IS21368	this paper	09B08-p65ADZp in attP40; MKRS/TM6B_VT025782-ZpGDBD in attP2	20151002_51_A3	goldammerj_is_screen_review	UAS_Chrimson_Venus_X_0070	A00	Wed Oct 21 14:01:15 EDT 2015	113248	Fly Light	Sample#2196768715737923682	f		screen	Terra Incognita	Jens Goldammer	JRC_IS21368-20151002_51_A3	Drosophila melanogaster	20x
IS21368	this paper	09B08-p65ADZp in attP40; MKRS/TM6B_VT025782-ZpGDBD in attP2	20160318_52_J1	goldammerj_is_screen_review	UAS_Chrimson_Venus_X_0070	A00	Sat Apr 02 10:36:07 EDT 2016	123731	Fly Light	Sample#2256148700491415650	f		screen	Terra Incognita	Jens Goldammer	JRC_IS21368-20160318_52_J1	Drosophila melanogaster	20x
IS21369	this paper	09B08-p65ADZp in attP40; MKRS/TM6B_47E07-ZpGdbd in attP2	20151002_51_A4	goldammerj_is_screen_review	UAS_Chrimson_Venus_X_0070	A00	Wed Oct 21 14:01:15 EDT 2015	113249	Fly Light	Sample#2196768716081856610	f		screen	Terra Incognita	Jens Goldammer	JRC_IS21369-20151002_51_A4	Drosophila melanogaster	20x
IS21370	this paper	09B08-p65ADZp in attP40; MKRS/TM6B_VT032162-ZpGdbd in attP2	20151002_52_B1	goldammerj_is_screen_review	UAS_Chrimson_Venus_X_0070	A00	Wed Oct 21 14:01:17 EDT 2015	113250	Fly Light	Sample#2196768722616582242	f		screen	Terra Incognita	Jens Goldammer	JRC_IS21370-20151002_52_B1	Drosophila melanogaster	20x
IS21371	this paper	09B08-p65ADZp in attP40; MKRS/TM6B_VT020732-ZpGdbd in attP2	20151002_52_B2	goldammerj_is_screen_review	UAS_Chrimson_Venus_X_0070	A00	Wed Oct 21 14:01:17 EDT 2015	113251	Fly Light	Sample#2196768722956320866	f		screen	Terra Incognita	Jens Goldammer	JRC_IS21371-20151002_52_B2	Drosophila melanogaster	20x
IS21372	this paper	09B08-p65ADZp in attP40; MKRS/TM6B_VT049126-ZpGDBD in attP2	20151002_52_B3	goldammerj_is_screen_review	UAS_Chrimson_Venus_X_0070	A00	Wed Oct 21 14:01:17 EDT 2015	113252	Fly Light	Sample#2196768723300253794	f		screen	Terra Incognita	Jens Goldammer	JRC_IS21372-20151002_52_B3	Drosophila melanogaster	20x
IS21373	this paper	23E12-p65ADZp in attP40; MKRS/TM6B_10F08-ZpGdbd in attP2	20151002_52_B4	goldammerj_is_screen_review	UAS_Chrimson_Venus_X_0070	A00	Wed Oct 21 14:01:17 EDT 2015	113253	Fly Light	Sample#2196768723652575330	f		screen	Terra Incognita	Jens Goldammer	JRC_IS21373-20151002_52_B4	Drosophila melanogaster	20x
IS21374	this paper	23E12-p65ADZp in attP40; MKRS/TM6B_32D10-ZpGdbd in attP2	20151002_52_C1	goldammerj_is_screen_review	UAS_Chrimson_Venus_X_0070	A00	Wed Oct 21 14:01:17 EDT 2015	113254	Fly Light	Sample#2196768724340441186	f		screen	Terra Incognita	Jens Goldammer	JRC_IS21374-20151002_52_C1	Drosophila melanogaster	20x
IS21375	this paper	23E12-p65ADZp in attP40; MKRS/TM6B_34B03-ZpGdbd in attP2	20151002_52_C2	goldammerj_is_screen_review	UAS_Chrimson_Venus_X_0070	A00	Wed Oct 21 14:01:17 EDT 2015	113255	Fly Light	Sample#2196768724751482978	f		screen	Terra Incognita	Jens Goldammer	JRC_IS21375-20151002_52_C2	Drosophila melanogaster	20x
IS21376	this paper	23E12-p65ADZp in attP40; MKRS/TM6B_HAV5; CyO/ Sco; 21D07-ZpGDBD in attP2	20151002_52_C3	goldammerj_is_screen_review	UAS_Chrimson_Venus_X_0070	A00	Wed Oct 21 14:01:18 EDT 2015	113256	Fly Light	Sample#2196768725095415906	f		screen	Terra Incognita	Jens Goldammer	JRC_IS21376-20151002_52_C3	Drosophila melanogaster	20x
IS21377	this paper	23E12-p65ADZp in attP40; MKRS/TM6B_20D06-ZpGdbd in attP2	20151002_52_B5	goldammerj_is_screen_review	UAS_Chrimson_Venus_X_0070	A00	Wed Oct 21 14:01:17 EDT 2015	113257	Fly Light	Sample#2196768723988119650	f		screen	Terra Incognita	Jens Goldammer	JRC_IS21377-20151002_52_B5	Drosophila melanogaster	20x
IS21378	this paper	12G03-p65ADZp in attP40_34B03-ZpGdbd in attP2	20151002_52_D1	goldammerj_is_screen_review	UAS_Chrimson_Venus_X_0070	A00	Wed Oct 21 14:01:18 EDT 2015	113258	Fly Light	Sample#2196768726055911522	f		screen	Terra Incognita	Jens Goldammer	JRC_IS21378-20151002_52_D1	Drosophila melanogaster	20x
IS21379	this paper	12G03-p65ADZp in attP40_HAV5; CyO/ Sco; 21D07-ZpGDBD in attP2	20151002_52_D2	goldammerj_is_screen_review	UAS_Chrimson_Venus_X_0070	A00	Wed Oct 21 14:01:18 EDT 2015	113259	Fly Light	Sample#2196768726420815970	f		screen	Terra Incognita	Jens Goldammer	JRC_IS21379-20151002_52_D2	Drosophila melanogaster	20x
IS21380	this paper	12G03-p65ADZp in attP40_32D10-ZpGdbd in attP2	20151002_52_C4	goldammerj_is_screen_review	UAS_Chrimson_Venus_X_0070	A00	Wed Oct 21 14:01:18 EDT 2015	113260	Fly Light	Sample#2196768725418377314	f		screen	Terra Incognita	Jens Goldammer	JRC_IS21380-20151002_52_C4	Drosophila melanogaster	20x
IS21381	this paper	w; 16C03-p65ADZp; MKRS/ TM6B_HAV5; CyO/ Sco; 21D07-ZpGDBD in attP2	20151002_52_C5	goldammerj_is_screen_review	UAS_Chrimson_Venus_X_0070	A00	Wed Oct 21 14:01:18 EDT 2015	113261	Fly Light	Sample#2196768725737144418	f		screen	Terra Incognita	Jens Goldammer	JRC_IS21381-20151002_52_C5	Drosophila melanogaster	20x
IS21382	this paper	w; 16C03-p65ADZp; MKRS/ TM6B_32D10-ZpGdbd in attP2	20151002_52_E1	goldammerj_is_screen_review	UAS_Chrimson_Venus_X_0070	A00	Wed Oct 21 14:01:18 EDT 2015	113262	Fly Light	Sample#2196768727737827426	f		screen	Terra Incognita	Jens Goldammer	JRC_IS21382-20151002_52_E1	Drosophila melanogaster	20x
IS21383	this paper	w; 16C03-p65ADZp; MKRS/ TM6B_34B03-ZpGdbd in attP2	20151002_52_D3	goldammerj_is_screen_review	UAS_Chrimson_Venus_X_0070	A00	Wed Oct 21 14:01:18 EDT 2015	113263	Fly Light	Sample#2196768726756360290	f		screen	Terra Incognita	Jens Goldammer	JRC_IS21383-20151002_52_D3	Drosophila melanogaster	20x
IS21385	this paper	38H01-p65ADZp in attP40_34B03-ZpGdbd in attP2	20151002_52_D4	goldammerj_is_screen_review	UAS_Chrimson_Venus_X_0070	A00	Wed Oct 21 14:01:18 EDT 2015	113265	Fly Light	Sample#2196768727083516002	f		screen	Terra Incognita	Jens Goldammer	JRC_IS21385-20151002_52_D4	Drosophila melanogaster	20x
IS21386	this paper	22H01-p65ADZp in attP40; MKRS/TM6B_72C10-ZpGdbd in attP2	20151002_52_D5	goldammerj_is_screen_review	UAS_Chrimson_Venus_X_0070	A00	Wed Oct 21 14:01:18 EDT 2015	113266	Fly Light	Sample#2196768727406477410	f		screen	Terra Incognita	Jens Goldammer	JRC_IS21386-20151002_52_D5	Drosophila melanogaster	20x
IS21387	this paper	44A07-p65ADZp in attP40_32D10-ZpGdbd in attP2	20151002_51_D5	goldammerj_is_screen_review	UAS_Chrimson_Venus_X_0070	A00	Wed Oct 21 14:01:16 EDT 2015	113267	Fly Light	Sample#2196768720536207458	f		screen	Terra Incognita	Jens Goldammer	JRC_IS21387-20151002_51_D5	Drosophila melanogaster	20x
IS21388	this paper	VT030279-p65ADZp in attP40_VT030303-ZpGDBD in attP2	20151002_52_E2	goldammerj_is_screen_review	UAS_Chrimson_Venus_X_0070	A00	Wed Oct 21 14:01:18 EDT 2015	113268	Fly Light	Sample#2196768728060788834	f		screen	Terra Incognita	Jens Goldammer	JRC_IS21388-20151002_52_E2	Drosophila melanogaster	20x
IS21389	this paper	VT030279-p65ADZp in attP40_VT044966-ZpGDBD in attP2	20151002_52_E3	goldammerj_is_screen_review	UAS_Chrimson_Venus_X_0070	A00	Wed Oct 21 14:01:18 EDT 2015	113269	Fly Light	Sample#2196768728387944546	f		screen	Terra Incognita	Jens Goldammer	JRC_IS21389-20151002_52_E3	Drosophila melanogaster	20x
IS21390	this paper	VT030303-p65ADZp in attP40_VT044966-ZpGDBD in attP2	20151009_52_A5	goldammerj_is_screen_review	UAS_Chrimson_Venus_X_0070	A00	Sat Oct 24 10:52:25 EDT 2015	113270	Fly Light	Sample#2197808358344360034	f		screen	Terra Incognita	Jens Goldammer	JRC_IS21390-20151009_52_A5	Drosophila melanogaster	20x
IS21391	this paper	13E12-p65ADZp in attP40_32D10-ZpGdbd in attP2	20151009_52_A6	goldammerj_is_screen_review	UAS_Chrimson_Venus_X_0070	A00	Sat Oct 24 10:52:26 EDT 2015	113271	Fly Light	Sample#2197808358738624610	f		screen	Terra Incognita	Jens Goldammer	JRC_IS21391-20151009_52_A6	Drosophila melanogaster	20x
IS21392	this paper	13E12-p65ADZp in attP40_34B03-ZpGdbd in attP2	20151211_53_J6	goldammerj_is_screen_review	UAS_Chrimson_Venus_X_0070	A00	Tue Jan 12 00:38:01 EST 2016	118583	Fly Light	Sample#2226659867282636898	f		screen	Terra Incognita	Jens Goldammer	JRC_IS21392-20151211_53_J6	Drosophila melanogaster	20x
IS21393	this paper	13E12-p65ADZp in attP40_HAV5; CyO/ Sco; 21D07-ZpGDBD in attP2	20151009_52_B2	goldammerj_is_screen_review	UAS_Chrimson_Venus_X_0070	A00	Sat Oct 24 10:52:26 EDT 2015	113273	Fly Light	Sample#2197808359166443618	f		screen	Terra Incognita	Jens Goldammer	JRC_IS21393-20151009_52_B2	Drosophila melanogaster	20x
IS21394	this paper	13E12-p65ADZp in attP40_42G10-ZpGdbd in attP2	20151009_52_B3	goldammerj_is_screen_review	UAS_Chrimson_Venus_X_0070	A00	Sat Oct 24 10:52:26 EDT 2015	113274	Fly Light	Sample#2197808359632011362	f		screen	Terra Incognita	Jens Goldammer	JRC_IS21394-20151009_52_B3	Drosophila melanogaster	20x
IS21395	this paper	64G09-p65ADZp in attP40; MKRS/TM6B_49A11-ZpGdbd in attP2	20151002_52_E4	goldammerj_is_screen_review	UAS_Chrimson_Venus_X_0070	A00	Wed Oct 21 14:01:18 EDT 2015	113275	Fly Light	Sample#2196768728731877474	f		screen	Terra Incognita	Jens Goldammer	JRC_IS21395-20151002_52_E4	Drosophila melanogaster	20x
IS21396	this paper	64G09-p65ADZp in attP40; MKRS/TM6B_HAV5; CyO/Sco; 56H09-ZpGDBD in attP2	20151002_52_E5	goldammerj_is_screen_review	UAS_Chrimson_Venus_X_0070	A00	Wed Oct 21 14:01:18 EDT 2015	113276	Fly Light	Sample#2196768729063227490	f		screen	Terra Incognita	Jens Goldammer	JRC_IS21396-20151002_52_E5	Drosophila melanogaster	20x
IS21397	this paper	VT012287-p65ADZp in attP40_VT045978-ZpGdbd in attP2	20151016_47_A1	nerna_is_screen_review	HAV5_X_0083	A01	Sat Nov 28 20:23:22 EST 2015	113589	Fly Light	Sample#2210650717205561442	f		screen	Rubin	Aljoscha Nern	JRC_IS21397-20151016_47_A1	Drosophila melanogaster	20x
IS21398	this paper	VT012287-p65ADZp in attP40_VT048350-ZpGdbd in attP2	20151016_47_A3	nerna_is_screen_review	HAV5_X_0083	A01	Sat Nov 28 20:23:23 EST 2015	113590	Fly Light	Sample#2210650718048616546	f		screen	Rubin	Aljoscha Nern	JRC_IS21398-20151016_47_A3	Drosophila melanogaster	20x
IS21399	this paper	VT012287-p65ADZp in attP40_VT028447-ZpGdbd in attP2	20151016_47_A6	nerna_is_screen_review	HAV5_X_0083	A01	Sat Nov 28 20:23:23 EST 2015	113591	Fly Light	Sample#2210650718455464034	f		screen	Rubin	Aljoscha Nern	JRC_IS21399-20151016_47_A6	Drosophila melanogaster	20x
IS21400	this paper	VT012287-p65ADZp in attP40_VT012290-ZpGdbd in attP2	20151016_47_B3	nerna_is_screen_review	HAV5_X_0083	A01	Sat Nov 28 20:23:23 EST 2015	113592	Fly Light	Sample#2210650718862311522	f		screen	Rubin	Aljoscha Nern	JRC_IS21400-20151016_47_B3	Drosophila melanogaster	20x
IS21401	this paper	VT012287-p65ADZp in attP40_VT062617-ZpGdbd in attP2	20151016_47_H4	nerna_is_screen_review	HAV5_X_0083	A01	Sat Nov 28 20:23:25 EST 2015	113593	Fly Light	Sample#2210650729977217122	f		screen	Rubin	Aljoscha Nern	JRC_IS21401-20151016_47_H4	Drosophila melanogaster	20x
IS21407	this paper	VT016266-p65ADZp in attP40_VT025805-ZpGDBD in attP2	20151016_47_D2	nerna_is_screen_review	HAV5_X_0083	A01	Sat Nov 28 20:23:23 EST 2015	113599	Fly Light	Sample#2210650721299202146	f		screen	Rubin	Aljoscha Nern	JRC_IS21407-20151016_47_D2	Drosophila melanogaster	20x
IS21408	this paper	VT016266-p65ADZp in attP40_VT058394-ZpGdbd in attP2	20151016_47_D3	nerna_is_screen_review	HAV5_X_0083	A01	Sat Nov 28 20:23:24 EST 2015	113600	Fly Light	Sample#2210650723274719330	f		screen	Rubin	Aljoscha Nern	JRC_IS21408-20151016_47_D3	Drosophila melanogaster	20x
IS21409	this paper	VT016266-p65ADZp in attP40_VT019079-ZpGdbd in attP2	20151016_47_E3	nerna_is_screen_review	HAV5_X_0083	A01	Sat Nov 28 20:23:24 EST 2015	113601	Fly Light	Sample#2210650725246042210	f		screen	Rubin	Aljoscha Nern	JRC_IS21409-20151016_47_E3	Drosophila melanogaster	20x
IS21410	this paper	VT025805-p65ADZp in attP40_VT016266-ZpGDBD in attP2	20151016_47_C5	nerna_is_screen_review	HAV5_X_0083	A01	Sat Nov 28 20:23:23 EST 2015	113602	Fly Light	Sample#2210650720904937570	f		screen	Rubin	Aljoscha Nern	JRC_IS21410-20151016_47_C5	Drosophila melanogaster	20x
IS21411	this paper	VT025805-p65ADZp in attP40_VT058394-ZpGdbd in attP2	20160930_53_I6	mckellarc_is_screen_review	UAS_Chrimson_Venus_X_0070	A00	Tue Oct 18 13:35:52 EDT 2016	135705	Fly Light	Sample#2328309120391708817	f		screen	Dickson	Claire McKellar	JRC_IS21411-20160930_53_I6	Drosophila melanogaster	20x
IS21411	this paper	VT025805-p65ADZp in attP40_VT058394-ZpGdbd in attP2	20151016_47_D4	nerna_is_screen_review	HAV5_X_0083	A01	Sat Nov 28 20:23:24 EST 2015	113603	Fly Light	Sample#2210650723656400994	f		screen	Rubin	Aljoscha Nern	JRC_IS21411-20151016_47_D4	Drosophila melanogaster	20x
IS21412	this paper	VT025805-p65ADZp in attP40_VT019079-ZpGdbd in attP2	20151016_47_E4	nerna_is_screen_review	HAV5_X_0083	A01	Sat Nov 28 20:23:24 EST 2015	113604	Fly Light	Sample#2210650725623529570	f		screen	Rubin	Aljoscha Nern	JRC_IS21412-20151016_47_E4	Drosophila melanogaster	20x
IS21414	this paper	VT040564-p65ADZp in attP40_VT044494-ZpGdbd in attP2	20151016_45_A5	nerna_is_screen_review	HAV5_X_0083	A01	Tue Nov 03 16:28:59 EST 2015	113606	Fly Light	Sample#2201532035472818250	f		screen	Rubin	Aljoscha Nern	JRC_IS21414-20151016_45_A5	Drosophila melanogaster	20x
IS21415	this paper	VT063626-p65ADZp in attP40_VT043377-ZpGdbd in attP2	20170217_41_D4	nerna_is_screen_review	UAS_Chrimson_Venus_X_0070	A01	Tue Mar 07 09:28:45 EST 2017	145273	Fly Light	Sample#2378996333005504610	f		screen	Rubin	Aljoscha Nern	JRC_IS21415-20170217_41_D4	Drosophila melanogaster	20x
IS21417	this paper	VT008975-p65ADZp in attP40_VT058387-ZpGdbd in attP2	20151016_47_C2	nerna_is_screen_review	HAV5_X_0083	A01	Sat Nov 28 20:23:23 EST 2015	113609	Fly Light	Sample#2210650719692783714	f		screen	Rubin	Aljoscha Nern	JRC_IS21417-20151016_47_C2	Drosophila melanogaster	20x
IS21419	this paper	VT043070-p65ADZp in attP40_42F06-ZpGdbd in attP2	20151016_47_G5	nerna_is_screen_review	HAV5_X_0083	A01	Sat Nov 28 20:23:25 EST 2015	113611	Fly Light	Sample#2210650728454684770	f		screen	Rubin	Aljoscha Nern	JRC_IS21419-20151016_47_G5	Drosophila melanogaster	20x
IS21422	this paper	VT048350-p65ADZp in attP40_VT049245-ZpGdbd in attP2	20151016_45_D5	nerna_is_screen_review	HAV5_X_0083	A01	Tue Nov 03 16:29:00 EST 2015	113614	Fly Light	Sample#2201532037343477834	f		screen	Rubin	Aljoscha Nern	JRC_IS21422-20151016_45_D5	Drosophila melanogaster	20x
IS21423	this paper	VT048350-p65ADZp in attP40_70B08-ZpGdbd in attP2	20151016_46_G1	nerna_is_screen_review	HAV5_X_0083	A01	Tue Nov 03 16:29:02 EST 2015	113615	Fly Light	Sample#2201532045321044042	f		screen	Rubin	Aljoscha Nern	JRC_IS21423-20151016_46_G1	Drosophila melanogaster	20x
IS21425	this paper	VT031490-p65ADZp in attP40_VT016681-ZpGdbd in attP2	20151016_47_F3	nerna_is_screen_review	HAV5_X_0083	A01	Sat Nov 28 20:23:25 EST 2015	113617	Fly Light	Sample#2210650726906986594	f		screen	Rubin	Aljoscha Nern	JRC_IS21425-20151016_47_F3	Drosophila melanogaster	20x
IS21428	this paper	VT044650-p65ADZp in attP40_VT016681-ZpGdbd in attP2	20151016_47_F4	nerna_is_screen_review	HAV5_X_0083	A01	Sat Nov 28 20:23:25 EST 2015	113620	Fly Light	Sample#2210650727276085346	f		screen	Rubin	Aljoscha Nern	JRC_IS21428-20151016_47_F4	Drosophila melanogaster	20x
IS21430	this paper	VT058394-p65ADZ in attP40_VT016266-ZpGDBD in attP2	20151016_47_C6	nerna_is_screen_review	HAV5_X_0083	A01	Sat Nov 28 20:23:23 EST 2015	113622	Fly Light	Sample#2210650721735409762	f		screen	Rubin	Aljoscha Nern	JRC_IS21430-20151016_47_C6	Drosophila melanogaster	20x
IS21431	this paper	VT058394-p65ADZ in attP40_VT025805-ZpGDBD in attP2	20151016_45_F2	nerna_is_screen_review	HAV5_X_0083	A01	Tue Nov 03 16:29:00 EST 2015	113623	Fly Light	Sample#2201532038257836106	f		screen	Rubin	Aljoscha Nern	JRC_IS21431-20151016_45_F2	Drosophila melanogaster	20x
IS21432	this paper	VT058394-p65ADZ in attP40_VT019079-ZpGdbd in attP2	20151016_47_E5	nerna_is_screen_review	HAV5_X_0083	A01	Sat Nov 28 20:23:24 EST 2015	113624	Fly Light	Sample#2210650726005211234	f		screen	Rubin	Aljoscha Nern	JRC_IS21432-20151016_47_E5	Drosophila melanogaster	20x
IS21437	this paper	VT016681-p65ADZp in attP40_VT044650-ZpGdbd in attP2	20151016_46_C6	nerna_is_screen_review	HAV5_X_0083	A01	Tue Nov 03 16:29:01 EST 2015	113629	Fly Light	Sample#2201532043945312330	f		screen	Rubin	Aljoscha Nern	JRC_IS21437-20151016_46_C6	Drosophila melanogaster	20x
IS21440	this paper	VT028447-p65ADZp in attP40_70B08-ZpGdbd in attP2	20151016_46_G2	nerna_is_screen_review	HAV5_X_0083	A01	Tue Nov 03 16:29:02 EST 2015	113632	Fly Light	Sample#2201532045778223178	f		screen	Rubin	Aljoscha Nern	JRC_IS21440-20151016_46_G2	Drosophila melanogaster	20x
IS21446	this paper	VT024643-p65ADZp in attP40_20C09-ZpGdbd in attP2	20151016_45_G1	nerna_is_screen_review	HAV5_X_0083	A01	Tue Nov 03 16:29:00 EST 2015	113638	Fly Light	Sample#2201532040224964682	f		screen	Rubin	Aljoscha Nern	JRC_IS21446-20151016_45_G1	Drosophila melanogaster	20x
IS21448	this paper	VT040713-p65ADZp in attP40_VT044650-ZpGdbd in attP2	20151016_46_D1	nerna_is_screen_review	HAV5_X_0083	A01	Tue Nov 03 16:29:01 EST 2015	113640	Fly Light	Sample#2201532044402491466	f		screen	Rubin	Aljoscha Nern	JRC_IS21448-20151016_46_D1	Drosophila melanogaster	20x
IS21449	this paper	VT040713-p65ADZp in attP40_VT016681-ZpGdbd in attP2	20151016_47_F5	nerna_is_screen_review	HAV5_X_0083	A01	Sat Nov 28 20:23:25 EST 2015	113641	Fly Light	Sample#2210650727653572706	f		screen	Rubin	Aljoscha Nern	JRC_IS21449-20151016_47_F5	Drosophila melanogaster	20x
IS21452	this paper	VT055812-p65ADZp in attP40_42F06-ZpGdbd in attP2	20151016_47_G6	nerna_is_screen_review	HAV5_X_0083	A01	Sat Nov 28 20:23:25 EST 2015	113644	Fly Light	Sample#2210650728836366434	f		screen	Rubin	Aljoscha Nern	JRC_IS21452-20151016_47_G6	Drosophila melanogaster	20x
IS21453	this paper	VT062636-p65ADZp in attP40_50C10-ZpGdbd in attP2	20151016_45_H2	nerna_is_screen_review	HAV5_X_0083	A01	Tue Nov 03 16:29:01 EST 2015	113645	Fly Light	Sample#2201532041273540682	f		screen	Rubin	Aljoscha Nern	JRC_IS21453-20151016_45_H2	Drosophila melanogaster	20x
IS21456	this paper	VT024647-p65ADZp in attP40_VT047325-ZpGdbd in attP2	20151016_47_F1	nerna_is_screen_review	HAV5_X_0083	A01	Sat Nov 28 20:23:25 EST 2015	113648	Fly Light	Sample#2210650726504333410	f		screen	Rubin	Aljoscha Nern	JRC_IS21456-20151016_47_F1	Drosophila melanogaster	20x
IS21458	this paper	VT013605-p65ADZp in attP40_VT043059-ZpGdbd in attP2	20151016_47_D6	nerna_is_screen_review	HAV5_X_0083	A01	Sat Nov 28 20:23:24 EST 2015	113650	Fly Light	Sample#2210650724453318754	f		screen	Rubin	Aljoscha Nern	JRC_IS21458-20151016_47_D6	Drosophila melanogaster	20x
IS21460	this paper	VT013605-p65ADZp in attP40_67E03-ZpGdbd in attP2	20151016_45_A1	nerna_is_screen_review	HAV5_X_0083	A01	Tue Nov 03 16:28:59 EST 2015	113652	Fly Light	Sample#2201532034327773258	f		screen	Rubin	Aljoscha Nern	JRC_IS21460-20151016_45_A1	Drosophila melanogaster	20x
IS21463	this paper	VT024637-p65ADZ in attP40_VT020714-ZpGDBD in attP2	20151016_45_C5	nerna_is_screen_review	HAV5_X_0083	A01	Tue Nov 03 16:28:59 EST 2015	113655	Fly Light	Sample#2201532035921608778	f		screen	Rubin	Aljoscha Nern	JRC_IS21463-20151016_45_C5	Drosophila melanogaster	20x
IS21466	this paper	VT062617-p65ADZ in attP40_VT049245-ZpGdbd in attP2	20151016_45_E1	nerna_is_screen_review	HAV5_X_0083	A01	Tue Nov 03 16:29:00 EST 2015	113658	Fly Light	Sample#2201532037800656970	f		screen	Rubin	Aljoscha Nern	JRC_IS21466-20151016_45_E1	Drosophila melanogaster	20x
IS21467	this paper	VT062617-p65ADZ in attP40_70B08-ZpGdbd in attP2	20151016_46_G3	nerna_is_screen_review	HAV5_X_0083	A01	Tue Nov 03 16:29:02 EST 2015	113659	Fly Light	Sample#2201532046256373834	f		screen	Rubin	Aljoscha Nern	JRC_IS21467-20151016_46_G3	Drosophila melanogaster	20x
IS21470	this paper	VT033629-p65ADZp in attP40_VT020822-ZpGDBD in attP2	20151016_46_E6	nerna_is_screen_review	HAV5_X_0083	A01	Tue Nov 03 16:29:01 EST 2015	113662	Fly Light	Sample#2201532044876447818	f		screen	Rubin	Aljoscha Nern	JRC_IS21470-20151016_46_E6	Drosophila melanogaster	20x
IS21473	this paper	VT019079-p65ADZp in attP40_VT016266-ZpGDBD in attP2	20151016_47_D1	nerna_is_screen_review	HAV5_X_0083	A01	Sat Nov 28 20:23:24 EST 2015	113665	Fly Light	Sample#2210650722511356002	f		screen	Rubin	Aljoscha Nern	JRC_IS21473-20151016_47_D1	Drosophila melanogaster	20x
IS21474	this paper	VT019079-p65ADZp in attP40_VT025805-ZpGDBD in attP2	20151016_45_F3	nerna_is_screen_review	HAV5_X_0083	A01	Tue Nov 03 16:29:00 EST 2015	113666	Fly Light	Sample#2201532039331577930	f		screen	Rubin	Aljoscha Nern	JRC_IS21474-20151016_45_F3	Drosophila melanogaster	20x
IS21475	this paper	VT019079-p65ADZp in attP40_VT058394-ZpGdbd in attP2	20151016_47_D5	nerna_is_screen_review	HAV5_X_0083	A01	Sat Nov 28 20:23:24 EST 2015	113667	Fly Light	Sample#2210650724050665570	f		screen	Rubin	Aljoscha Nern	JRC_IS21475-20151016_47_D5	Drosophila melanogaster	20x
IS21488	this paper	VT025965-p65ADZp in attP40_42F06-ZpGdbd in attP2	20151016_47_H2	nerna_is_screen_review	HAV5_X_0083	A01	Sat Nov 28 20:23:25 EST 2015	113680	Fly Light	Sample#2210650729213853794	f		screen	Rubin	Aljoscha Nern	JRC_IS21488-20151016_47_H2	Drosophila melanogaster	20x
IS21489	this paper	VT049732-p65ADZ in attP40_VT049113-ZpGdbd in attP2	20151016_47_C4	nerna_is_screen_review	HAV5_X_0083	A01	Sat Nov 28 20:23:23 EST 2015	113681	Fly Light	Sample#2210650720468729954	f		screen	Rubin	Aljoscha Nern	JRC_IS21489-20151016_47_C4	Drosophila melanogaster	20x
IS21493	this paper	VT049732-p65ADZ in attP40_67E03-ZpGdbd in attP2	20151016_45_A2	nerna_is_screen_review	HAV5_X_0083	A01	Tue Nov 03 16:28:59 EST 2015	113685	Fly Light	Sample#2201532035011444810	f		screen	Rubin	Aljoscha Nern	JRC_IS21493-20151016_45_A2	Drosophila melanogaster	20x
IS21500	this paper	14A11-p65ADZp in attP40; MKRS/TM6B_VT044166-ZpGdbd in attP2	20151016_46_A6	nerna_is_screen_review	HAV5_X_0083	A01	Tue Nov 03 16:29:01 EST 2015	113692	Fly Light	Sample#2201532040782807114	f		screen	Rubin	Aljoscha Nern	JRC_IS21500-20151016_46_A6	Drosophila melanogaster	20x
IS21501	this paper	14A11-p65ADZp in attP40; MKRS/TM6B_VT062636-ZpGdbd in attP2	20151016_47_B5	nerna_is_screen_review	HAV5_X_0083	A01	Sat Nov 28 20:23:23 EST 2015	113693	Fly Light	Sample#2210650719281741922	f		screen	Rubin	Aljoscha Nern	JRC_IS21501-20151016_47_B5	Drosophila melanogaster	20x
IS21507	this paper	59E08-p65ADZp in attP40_VT043070-ZpGDBD in attP2	20151016_46_B4	nerna_is_screen_review	HAV5_X_0083	A01	Tue Nov 03 16:29:01 EST 2015	113699	Fly Light	Sample#2201532042615717962	f		screen	Rubin	Aljoscha Nern	JRC_IS21507-20151016_46_B4	Drosophila melanogaster	20x
IS21508	this paper	59E08-p65ADZp in attP40_VT047164-ZpGdbd in attP2	20151016_47_A2	nerna_is_screen_review	HAV5_X_0083	A01	Sat Nov 28 20:23:22 EST 2015	113700	Fly Light	Sample#2210650717608214626	f		screen	Rubin	Aljoscha Nern	JRC_IS21508-20151016_47_A2	Drosophila melanogaster	20x
IS21509	this paper	59E08-p65ADZp in attP40_VT006199-ZpGDBD in attP2	20151016_45_D1	nerna_is_screen_review	HAV5_X_0083	A01	Tue Nov 03 16:28:59 EST 2015	113701	Fly Light	Sample#2201532036366205002	f		screen	Rubin	Aljoscha Nern	JRC_IS21509-20151016_45_D1	Drosophila melanogaster	20x
IS21511	this paper	59E08-p65ADZp in attP40_73F02-ZpGdbd in attP2	20151016_45_H3	nerna_is_screen_review	HAV5_X_0083	A01	Tue Nov 03 16:29:01 EST 2015	113703	Fly Light	Sample#2201532042179510346	f		screen	Rubin	Aljoscha Nern	JRC_IS21511-20151016_45_H3	Drosophila melanogaster	20x
IS21512	this paper	59E08-p65ADZp in attP40_79D04-ZpGDBD in attP2	20151016_46_A3	nerna_is_screen_review	HAV5_X_0083	A01	Tue Nov 03 16:29:00 EST 2015	113704	Fly Light	Sample#2201532038840844362	f		screen	Rubin	Aljoscha Nern	JRC_IS21512-20151016_46_A3	Drosophila melanogaster	20x
IS21515	this paper	67E03-p65ADZp in attP40_VT049113-ZpGdbd in attP2	20151016_47_C3	nerna_is_screen_review	HAV5_X_0083	A01	Sat Nov 28 20:23:23 EST 2015	113707	Fly Light	Sample#2210650720091242594	f		screen	Rubin	Aljoscha Nern	JRC_IS21515-20151016_47_C3	Drosophila melanogaster	20x
IS21516	this paper	67E03-p65ADZp in attP40_VT043059-ZpGdbd in attP2	20151016_47_E2	nerna_is_screen_review	HAV5_X_0083	A01	Sat Nov 28 20:23:24 EST 2015	113708	Fly Light	Sample#2210650724881137762	f		screen	Rubin	Aljoscha Nern	JRC_IS21516-20151016_47_E2	Drosophila melanogaster	20x
IS21521	this paper	w; 73E05-p65ADZ; MKRS/TM6B_VT044494-ZpGdbd in attP2	20151016_47_G3	nerna_is_screen_review	HAV5_X_0083	A01	Sat Nov 28 20:23:24 EST 2015	113713	Fly Light	Sample#2210650722129674338	f		screen	Rubin	Aljoscha Nern	JRC_IS21521-20151016_47_G3	Drosophila melanogaster	20x
IS21522	this paper	73F02-p65ADZp in attP40_42F06-ZpGdbd in attP2	20151016_47_H3	nerna_is_screen_review	HAV5_X_0083	A01	Sat Nov 28 20:23:25 EST 2015	113714	Fly Light	Sample#2210650729599729762	f		screen	Rubin	Aljoscha Nern	JRC_IS21522-20151016_47_H3	Drosophila melanogaster	20x
IS21523	this paper	78A04-p65ADZp in attP40_VT047325-ZpGdbd in attP2	20151016_46_C4	nerna_is_screen_review	HAV5_X_0083	A01	Tue Nov 03 16:29:01 EST 2015	113715	Fly Light	Sample#2201532043039342666	f		screen	Rubin	Aljoscha Nern	JRC_IS21523-20151016_46_C4	Drosophila melanogaster	20x
IS21527	this paper	w; 91C05-p65ADZ; MKRS/TM6B_VT042758-ZpGdbd in attP2	20151016_45_D3	nerna_is_screen_review	HAV5_X_0083	A01	Tue Nov 03 16:29:00 EST 2015	113719	Fly Light	Sample#2201532036873715786	f		screen	Rubin	Aljoscha Nern	JRC_IS21527-20151016_45_D3	Drosophila melanogaster	20x
IS21528	this paper	VT019906-p65ADZp in attP40_10B02-ZpGdbd in attP2	20170217_41_A6	nerna_is_screen_review	UAS_Chrimson_Venus_X_0070	A01	Tue Mar 07 09:28:44 EST 2017	145271	Fly Light	Sample#2378996331084513378	f		screen	Rubin	Aljoscha Nern	JRC_IS21528-20170217_41_A6	Drosophila melanogaster	20x
IS21529	this paper	VT019906-p65ADZp in attP40_38B09-ZpGdbd in attP2	20151023_45_C3	nerna_is_screen_review	HAV5_X_0083	A01	Tue Nov 10 11:18:15 EST 2015	113774	Fly Light	Sample#2203990552720965706	f		screen	Rubin	Aljoscha Nern	JRC_IS21529-20151023_45_C3	Drosophila melanogaster	20x
IS21532	this paper	VT015785-p65ADZp in attP40_94H01-ZpGdbd in attP2	20151023_43_E4	nerna_is_screen_review	HAV5_X_0083	A01	Mon Nov 09 16:16:25 EST 2015	113777	Fly Light	Sample#2203703198714167370	f		screen	Rubin	Aljoscha Nern	JRC_IS21532-20151023_43_E4	Drosophila melanogaster	20x
[truncated: 121,818 more rows]

## Sheet: Effectors
Code	Robot ID	DOI	Genotype
[truncated: 19 more rows]
